# Supplementary material for: New approaches for capturing and estimating variation in complex animal color patterns from digital photographs: application to the Eastern Box Turtle (Terrapene carolina)
Source: PeerJ journal article supplement (doi:10.7717/peerj.19690), 2025-07-21
Supplement: PeerJ_All_DataAnalysisFiles.zip [file PeerJ_Data_Angle_Variation_Figure9.xlsx]

## Sheet: Raw Data
	red	blue	green	yellow	centrality	occupation	normalized	euclidean	intensity
'g10l_29m_T_276.6.png'	62.3406	6.4298	42.4105	10.6572	0.7584	0.7562	0.0468	75.6726	44.2784	'g10l	29m	T	276.6.png'
'g05l_29m_T_280.6.png'	59.4901	6.9977	40.8784	10.5724	0.7571	0.7478	0.0427	72.5195	42.5866	'g05l	29m	T	280.6.png'
'g00H_29m_T_285.2.png'	63.7413	7.2518	41.2476	10.9634	0.75	0.7382	0.0323	76.2687	44.0968	'g00H	29m	T	285.2.png'
'g05r_29m_T_274.3.png'	49.9387	9.6946	35.9472	14.3936	0.759	0.7435	0.0529	62.2902	37.144	'g05r	29m	T	274.3.png'
'g10r_29m_T_282.3.png'	60.5862	6.7333	41.6659	12.6793	0.7541	0.7459	0.0407	73.8382	43.3486	'g10r	29m	T	282.3.png'
'h10l_29m_T_276.8.png'	62.5219	6.9023	42.6111	10.8885	0.7593	0.7569	0.041	75.9759	44.4934	'h10l	29m	T	276.8.png'
'h05l_29m_T_276.7.png'	58.801	6.5364	40.0534	10.1406	0.7491	0.7368	0.0406	71.4462	41.844	'h05l	29m	T	276.7.png'
'h00H_29m_T_288.5.png'	64.4697	7.8525	42.0228	11.4304	0.7619	0.761	0.0286	77.3558	44.841	'h00H	29m	T	288.5.png'
'h05r_29m_T_280.3.png'	47.9597	8.6723	34.2859	13.3989	0.7424	0.7223	0.0426	59.5892	35.4562	'h05r	29m	T	280.3.png'
'h10r_29m_T_279.2.png'	59.824	6.5979	41.1047	12.3125	0.7476	0.7456	0.0362	72.8838	42.7663	'h10r	29m	T	279.2.png'
'i10l_29m_T_279.0.png'	61.9746	6.6138	42.08	10.569	0.7481	0.7396	0.039	75.2018	43.9881	'i10l	29m	T	279.0.png'
'i05l_29m_T_283.8.png'	60.4424	6.5126	41.249	10.5098	0.7577	0.7585	0.0387	73.4655	43.034	'i05l	29m	T	283.8.png'
'i00H_29m_T_290.4.png'	64.1946	7.5823	41.9467	11.1276	0.757	0.7487	0.028	77.0582	44.6778	'i00H	29m	T	290.4.png'
'i05r_29m_T_280.2.png'	48.3086	9.1958	34.9313	14.1532	0.7534	0.7373	0.0484	60.3198	36.0094	'i05r	29m	T	280.2.png'
'i10r_29m_T_281.3.png'	59.5086	6.4026	40.6792	12.1146	0.7334	0.7149	0.0383	72.3676	42.4032	'i10r	29m	T	281.3.png'
'd10l_30m_T_274.0.png'	94.1982	36.7458	78.1496	51.1238	0.8139	0.9446	0.0535	127.793	78.23	'd10l	30m	T	274.0.png'
'd05l_30m_T_280.0.png'	90.1093	36.0738	74.1988	45.8712	0.8211	0.9511	0.0574	122.174	74.6152	'd05l	30m	T	280.0.png'
'd00H_30m_T_270.0.png'	103.474	40.4599	83.1115	59.2459	0.8177	0.9465	0.057	138.749	84.3424	'd00H	30m	T	270.0.png'
'd05r_30m_T_268.2.png'	96.0882	38.5315	80.1147	52.6999	0.8263	0.9652	0.0553	130.904	80.147	'd05r	30m	T	268.2.png'
'd10r_30m_T_268.4.png'	96.2194	38.6392	80.3815	49.8367	0.8213	0.9451	0.055	131.196	80.3618	'd10r	30m	T	268.4.png'
'e10l_30m_T_273.4.png'	92.5888	36.0683	77.1847	50.1593	0.8227	0.9589	0.0529	125.822	77.1053	'e10l	30m	T	273.4.png'
'e05l_30m_T_277.1.png'	90.7294	36.3659	74.8879	46.1366	0.8206	0.9516	0.0526	123.136	75.2312	'e05l	30m	T	277.1.png'
'e00H_30m_T_269.9.png'	102.949	38.083	80.9464	53.7393	0.8309	0.9638	0.0576	136.386	82.6428	'e00H	30m	T	269.9.png'
'e05r_30m_T_275.4.png'	96.6643	38.8941	79.9657	53.2895	0.8312	0.9715	0.0548	131.344	80.2747	'e05r	30m	T	275.4.png'
'e10r_30m_T_273.8.png'	96.2304	38.1146	79.3405	49.848	0.8263	0.9612	0.0537	130.414	79.6909	'e10r	30m	T	273.8.png'
'f10l_30m_T_276.0.png'	94.508	36.741	79.0706	51.1281	0.8097	0.9413	0.052	128.584	78.8638	'f10l	30m	T	276.0.png'
'f05l_30m_T_281.1.png'	90.039	36.5021	74.2915	46.343	0.8143	0.9336	0.0545	122.305	74.693	'f05l	30m	T	281.1.png'
'f00H_30m_T_274.0.png'	103.364	40.9072	82.8968	59.4192	0.8148	0.9363	0.0581	138.67	84.2303	'f00H	30m	T	274.0.png'
'f05r_30m_T_266.2.png'	96.758	39.4711	80.0353	53.7999	0.8116	0.9323	0.0539	131.627	80.4108	'f05r	30m	T	266.2.png'
'f10r_30m_T_267.6.png'	94.4978	38.0279	78.6052	49.1442	0.8155	0.948	0.0498	128.665	78.7331	'f10r	30m	T	267.6.png'
'a10l_2-4_T_364.7.png'	94.2049	21.0514	78.5272	27.1617	0.8397	0.9299	0.0161	124.436	76.6509	'a10l	2024-02-04	T	364.7.png'
'a00H_2-4_T_354.2.png'	108.68	24.5875	92.2056	43.5056	0.8553	0.9536	0.0287	144.63	89.4214	'a00H	2024-02-04	T	354.2.png'
'a10r_2-4_T_356.2.png'	83.7986	21.1432	73.4963	28.7717	0.839	0.93	0.0178	113.45	70.6082	'a10r	2024-02-04	T	356.2.png'
'b10l_2-4_T_363.5.png'	96.9003	21.0603	79.7321	27.2646	0.8337	0.9205	0.0256	127.242	78.1587	'b10l	2024-02-04	T	363.5.png'
'b00H_2-4_T_355.3.png'	110.603	23.4049	95.5536	42.3734	0.8404	0.9295	0.0244	148.025	91.8299	'b00H	2024-02-04	T	355.3.png'
'b10r_2-4_T_354.3.png'	82.2665	20.1108	71.8395	27.8989	0.8316	0.9153	0.0248	111.055	69.059	'b10r	2024-02-04	T	354.3.png'
'c10l_2-4_T_365.0.png'	97.0534	21.1899	79.8699	27.3979	0.8324	0.9162	0.0253	127.466	78.2998	'c10l	2024-02-04	T	365.0.png'
'c00H_2-4_T_354.5.png'	108.473	24.3176	92.4132	42.9791	0.8434	0.9346	0.026	144.561	89.4459	'c00H	2024-02-04	T	354.5.png'
'c10r_2-4_T_354.9.png'	83.1195	20.9194	73.0498	28.527	0.8306	0.9159	0.0228	112.618	70.1099	'c10r	2024-02-04	T	354.9.png'
'a00S_30m_F_624.9.png'	107.478	35.2818	84.9471	59.956	0.7749	0.736	0.0541	141.465	86.0209	'a00S	30m	F	624.9.png'
'a05f_30m_F_633.7.png'	78.9083	34.05	70.0495	51.9973	0.7774	0.6966	0.031	110.873	68.5878	'a05f	30m	F	633.7.png'
'a10f_30m_F_781.4.png'	57.378	26.3067	50.2709	34.3726	0.7754	0.6932	0.007	80.6935	49.6446	'a10f	30m	F	781.4.png'
'b00S_30m_F_650.9.png'	107.38	34.7386	84.748	59.8537	0.7809	0.7465	0.0524	141.136	85.8131	'b00S	30m	F	650.9.png'
'b05f_30m_F_611.2.png'	79.474	34.3555	70.3062	52.1851	0.7773	0.6989	0.0355	111.532	68.9366	'b05f	30m	F	611.2.png'
'b10f_30m_F_724.8.png'	57.4788	26.3169	50.0696	34.5819	0.7779	0.6976	0.0056	80.6434	49.558	'b10f	30m	F	724.8.png'
'c00S_30m_F_637.5.png'	108.699	35.3978	86.0103	60.5149	0.7807	0.7454	0.0478	143.06	87.0284	'c00S	30m	F	637.5.png'
'c05f_30m_F_612.4.png'	78.8195	34.0073	69.8217	51.8465	0.7751	0.7005	0.0296	110.653	68.424	'c05f	30m	F	612.4.png'
'c10f_30m_F_718.1.png'	57.6266	26.4365	50.4599	34.6709	0.786	0.7113	0.0133	81.0304	49.8438	'c10f	30m	F	718.1.png'
'g00S_29m_F_672.5.png'	54.7	1.0234	32.1079	5.6721	0.713	0.7849	0.0675	63.4354	35.3204	'g00S	29m	F	672.5.png'
'g05f_29m_F_651.0.png'	22.7871	3.2629	14.411	3.7473	0.6957	0.7093	0.0567	27.1583	15.6816	'g05f	29m	F	651.0.png'
'g10f_29m_F_606.1.png'	23.6287	4.0922	14.5566	4.6025	0.6826	0.6877	0.0419	28.0528	16.1227	'g10f	29m	F	606.1.png'
'h00S_29m_F_687.0.png'	39.6274	3.7079	24.3556	6.4871	0.7227	0.7861	0.0575	46.6613	26.5614	'h00S	29m	F	687.0.png'
'h05f_29m_F_672.4.png'	23.6088	4.0088	14.5189	4.5326	0.6926	0.6995	0.0487	28.0043	16.0837	'h05f	29m	F	672.4.png'
'h10f_29m_F_591.0.png'	22.4713	4.0841	14.0172	4.5727	0.7039	0.7141	0.0483	26.7978	15.4686	'h10f	29m	F	591.0.png'
'i00S_29m_F_687.1.png'	42.5756	3.0232	25.6905	6.468	0.7051	0.7816	0.0622	49.8179	28.1468	'i00S	29m	F	687.1.png'
'i05f_29m_F_672.1.png'	22.5017	4.165	14.0419	4.6431	0.6911	0.6884	0.052	26.8487	15.5026	'i05f	29m	F	672.1.png'
'i10f_29m_F_624.2.png'	23.158	4.3321	14.5504	4.7738	0.6989	0.7106	0.0456	27.6907	16.0139	'i10f	29m	F	624.2.png'
'a00S_2-4_F_788.1.png'	67.2126	-6.9817	44.7336	23.1907	0.9476	0.921	0.0392	81.0393	45.5557	'a00S	2024-02-04	F	788.1.png'
'a10f_2-4_F_926.3.png'	82.8757	15.0852	60.1296	22.0821	0.8821	0.8124	0.0113	103.496	61.7971	'a10f	2024-02-04	F	926.3.png'
'b00S_2-4_F_748.0.png'	66.9302	-6.6987	44.4498	22.8273	0.9363	0.9005	0.0415	80.6245	45.3387	'b00S	2024-02-04	F	748.0.png'
'b10f_2-4_F_916.1.png'	80.7551	14.6352	59.0433	21.8504	0.8818	0.8137	0.0108	101.102	60.4726	'b10f	2024-02-04	F	916.1.png'
'c00S_2-4_F_837.0.png'	64.9419	-5.264	43.1572	23.3486	0.9382	0.8998	0.0409	78.1518	44.1493	'c00S	2024-02-04	F	837.0.png'
'c10f_2-4_F_926.0.png'	83.0525	15.0072	60.1314	21.8174	0.8847	0.8158	0.0131	103.628	61.8402	'c10f	2024-02-04	F	926.0.png'
'a00S_30m_B_651.6.png'	50.1667	21.7432	39.9239	22.9972	0.8777	0.8098	0.1098	67.7007	40.9317	'a00S	30m	B	651.6.png'
'a05b_30m_B_634.6.png'	11.6854	5.5926	9.9609	5.7295	0.8383	0.6976	0.1108	16.3415	9.9481	'a05b	30m	B	634.6.png'
'a10b_30m_B_723.4.png'	17.7568	8.235	14.6285	8.3976	0.8399	0.6765	0.151	24.4359	14.8168	'a10b	30m	B	723.4.png'
'b00S_30m_B_639.0.png'	50.2853	21.8054	40.1371	23.0452	0.8853	0.814	0.1121	67.9343	41.1012	'b00S	30m	B	639.0.png'
'b05b_30m_B_611.8.png'	12.737	6.0182	10.8262	6.1469	0.8521	0.7263	0.109	17.7667	10.8366	'b05b	30m	B	611.8.png'
'b10b_30m_B_720.6.png'	18.1533	8.3371	14.9201	8.5029	0.8646	0.7098	0.1347	24.9331	15.1246	'b10b	30m	B	720.6.png'
'c00S_30m_B_621.5.png'	50.5187	22.0362	40.1538	23.3004	0.8793	0.8108	0.1115	68.1913	41.2047	'c00S	30m	B	621.5.png'
'c05b_30m_B_640.0.png'	12.9266	6.1568	11.0539	6.2799	0.8489	0.7104	0.1149	18.0885	11.0422	'c05b	30m	B	640.0.png'
'c10b_30m_B_717.9.png'	18.5631	8.4825	15.2922	8.6573	0.8669	0.7258	0.1322	25.5028	15.4876	'c10b	30m	B	717.9.png'
'g00S_29m_B_778.1.png'	29.011	7.5544	18.3231	8.0505	0.6845	0.5429	0.0482	35.1346	20.3424	'g00S	29m	B	778.1.png'
'g05b_29m_B_606.1.png'	20.5246	4.9182	12.66	4.9821	0.6793	0.5535	0.0535	24.6115	14.1982	'g05b	29m	B	606.1.png'
'g10b_29m_B_594.1.png'	20.8069	5.3179	13.0052	5.4736	0.6669	0.5468	0.046	25.1066	14.5264	'g10b	29m	B	594.1.png'
'h00S_29m_B_830.9.png'	35.4606	9.018	22.4381	9.7147	0.6692	0.5147	0.0645	42.9214	24.8464	'h00S	29m	B	830.9.png'
'h05b_29m_B_609.0.png'	20.7775	4.6416	12.5432	4.7227	0.6801	0.5633	0.0217	24.71	14.1826	'h05b	29m	B	609.0.png'
'i00S_29m_B_818.0.png'	34.5248	8.9148	22.0034	9.5346	0.675	0.5259	0.0651	41.8997	24.3084	'i00S	29m	B	818.0.png'
'i05b_29m_B_615.1.png'	21.2415	4.8647	12.7915	4.9259	0.6828	0.5609	0.0438	25.2683	14.4992	'i05b	29m	B	615.1.png'
'i10b_29m_B_597.0.png'	21.3071	4.9746	12.9063	5.1154	0.6861	0.5704	0.0265	25.403	14.5847	'i10b	29m	B	597.0.png'
'a00S_2-4_B_851.1.png'	32.2149	12.4096	27.6372	13.8463	0.7732	0.6606	0.0883	44.2224	27.2794	'a00S	2024-02-04	B	851.1.png'
'a10b_2-4_B_895.8.png'	31.9937	12.689	27.4281	15.6366	0.7811	0.8336	0.0433	44.0103	27.1334	'a10b	2024-02-04	B	895.8.png'
'b00S_2-4_B_854.8.png'	32.3255	12.2403	27.6796	13.7145	0.7792	0.763	0.0847	44.2823	27.3158	'b00S	2024-02-04	B	854.8.png'
'b10b_2-4_B_929.6.png'	30.8868	12.3985	26.3622	15.1407	0.7763	0.8225	0.0492	42.458	26.1419	'b10b	2024-02-04	B	929.6.png'
'c00S_2-4_B_850.7.png'	31.6386	11.9652	27.2724	13.4746	0.774	0.7587	0.0805	43.4506	26.8422	'c00S	2024-02-04	B	850.7.png'
'c10b_2-4_B_941.5.png'	30.1744	11.9441	25.6969	14.7986	0.7878	0.8322	0.0404	41.3943	25.4862	'c10b	2024-02-04	B	941.5.png'
'a00S_30m_L_625.8.png'	38.5054	1.6321	25.1095	14.5277	0.8622	0.8862	0.0626	45.998	26.4113	'a00S	30m	L	625.8.png'
'a05l_30m_L_647.2.png'	19.3496	0.0176	13.6023	7.2468	0.8263	0.8363	0.0582	23.6523	13.7141	'a05l	30m	L	647.2.png'
'a10l_30m_L_698.3.png'	10.0831	-5.5853	4.6889	1.2529	0.8297	0.8604	0.0905	12.4439	5.0724	'a10l	30m	L	698.3.png'
'b00S_30m_L_630.0.png'	36.9335	0.3058	23.6348	13.3325	0.8807	0.9019	0.0691	43.8495	24.9229	'b00S	30m	L	630.0.png'
'b05l_30m_L_605.2.png'	19.5969	-0.0797	13.6563	7.2588	0.8296	0.837	0.0593	23.8859	13.8055	'b05l	30m	L	605.2.png'
'b10l_30m_L_703.1.png'	10.4598	-5.304	5.1001	1.43	0.8193	0.8557	0.0881	12.7887	5.459	'b10l	30m	L	703.1.png'
'c00S_30m_L_639.2.png'	37.918	0.8518	24.5886	13.8535	0.8695	0.9009	0.0651	45.2006	25.8419	'c00S	30m	L	639.2.png'
'c05l_30m_L_613.2.png'	18.8027	-0.8722	12.8091	6.5158	0.8352	0.8633	0.0642	22.7679	12.9834	'c05l	30m	L	613.2.png'
'c10l_30m_L_689.8.png'	10.7225	-5.1347	5.3388	1.6874	0.8219	0.8577	0.0884	13.0323	5.6958	'c10l	30m	L	689.8.png'
'g00S_29m_L_717.2.png'	39.3138	5.2445	26.9554	8.1828	0.8408	0.7144	0.0181	47.9549	28.1839	'g00S	29m	L	717.2.png'
'g05l_29m_L_711.0.png'	23.7644	4.4604	15.7074	4.8122	0.8389	0.7872	0.0278	28.8334	16.8867	'g05l	29m	L	711.0.png'
'g10l_29m_L_774.3.png'	21.5008	3.8226	13.7279	3.9893	0.8062	0.7523	0.021	25.7944	14.995	'g10l	29m	L	774.3.png'
'h00S_29m_L_702.2.png'	36.5956	5.3854	24.995	8.1512	0.8438	0.7264	0.0183	44.6429	26.2353	'h00S	29m	L	702.2.png'
'h05l_29m_L_693.0.png'	23.6648	4.4865	15.61	4.7837	0.8449	0.7997	0.0313	28.7023	16.8067	'h05l	29m	L	693.0.png'
'h10l_29m_L_771.1.png'	21.8223	3.8549	13.8622	4.0079	0.8114	0.7689	0.0285	26.1387	15.1795	'h10l	29m	L	771.1.png'
'i00S_29m_L_726.4.png'	35.8081	5.0307	24.4319	7.6592	0.8407	0.7237	0.0187	43.64	25.6319	'i00S	29m	L	726.4.png'
'i05l_29m_L_693.1.png'	23.7306	4.4674	15.5599	4.8058	0.8432	0.7104	0.0276	28.7264	16.797	'i05l	29m	L	693.1.png'
'i10l_29m_L_759.1.png'	20.6869	3.8634	13.2771	3.9832	0.8081	0.6915	0.0197	24.8828	14.4826	'i10l	29m	L	759.1.png'
'a00S_2-4_L_807.0.png'	-1.2709	-29.5962	-12.5159	-13.3744	0.8016	0.9356	0.1089	32.1589	-11.1314	'a00S	2024-02-04	L	807.0.png'
'a10l_2-4_L_734.0.png'	36.0676	5.8777	26.6581	16.5127	0.8276	0.8862	0.0108	45.2336	27.1072	'a10l	2024-02-04	L	734.0.png'
'b00S_2-4_L_748.0.png'	13.534	-16.6142	2.6065	-2.7709	0.7768	0.8619	0.0643	21.5869	3.6827	'b00S	2024-02-04	L	748.0.png'
'b10l_2-4_L_655.5.png'	36.3269	8.6561	27.6681	17.2959	0.8234	0.883	0.0043	46.4768	28.1056	'b10l	2024-02-04	L	655.5.png'
'c00S_2-4_L_777.1.png'	14.9963	-17.5395	3.1002	-2.8523	0.778	0.8789	0.0661	23.2838	4.3	'c00S	2024-02-04	L	777.1.png'
'c10l_2-4_L_705.7.png'	38.7545	7.938	29.1502	17.9315	0.8302	0.8857	0.0029	49.1392	29.6142	'c10l	2024-02-04	L	705.7.png'
'a00S_30m_R_626.2.png'	39.9918	3.3387	27.6418	16.3532	0.961	0.8955	0.0881	48.7294	28.5398	'a00S	30m	R	626.2.png'
'a05r_30m_R_797.3.png'	19.7449	5.53	15.8617	9.591	0.8493	0.8947	0.0229	25.9236	15.8007	'a05r	30m	R	797.3.png'
'a10r_30m_R_721.9.png'	11.9361	-2.0564	7.7906	3.4374	0.9698	0.886	0.136	14.4012	7.8725	'a10r	30m	R	721.9.png'
'b00S_30m_R_637.0.png'	41.0109	4.2119	28.5833	17.1551	0.9523	0.8888	0.0825	50.1661	29.4946	'b00S	30m	R	637.0.png'
'b05r_30m_R_795.7.png'	23.4164	8.1757	19.3891	12.0741	0.8401	0.8376	0.0034	31.4819	19.2711	'b05r	30m	R	795.7.png'
'b10r_30m_R_706.6.png'	11.2484	-2.812	7.0296	2.8608	0.985	0.8946	0.1439	13.5591	7.133	'b10r	30m	R	706.6.png'
'c00S_30m_R_617.9.png'	40.8896	3.8838	28.3863	16.7773	0.9478	0.8845	0.086	49.9282	29.3052	'c00S	30m	R	617.9.png'
'c05r_30m_R_794.9.png'	23.3056	8.0201	19.2538	11.8984	0.8343	0.826	0.0036	31.2759	19.1396	'c05r	30m	R	794.9.png'
'c10r_30m_R_731.6.png'	12.0824	-2.0186	7.9011	3.5696	0.9924	0.9066	0.1393	14.5769	7.9863	'c10r	30m	R	731.6.png'
'g00S_29m_R_642.3.png'	31.282	6.2108	20.8441	8.6407	0.8385	0.6995	0.014	38.1	22.3041	'g00S	29m	R	642.3.png'
'g05r_29m_R_636.0.png'	15.7382	3.9286	10.7096	4.0339	0.7898	0.6699	0.0426	19.4376	11.4923	'g05r	29m	R	636.0.png'
'g10r_29m_R_660.0.png'	12.105	2.7107	8.2622	2.7756	0.7864	0.6851	0.0502	14.9044	8.8996	'g10r	29m	R	660.0.png'
'h00S_29m_R_681.2.png'	30.7726	5.8385	20.1569	8.4467	0.831	0.7019	0.0255	37.2471	21.7134	'h00S	29m	R	681.2.png'
'h05r_29m_R_663.1.png'	14.966	3.4725	10.3644	3.5255	0.7889	0.6818	0.0399	18.5327	11.0267	'h05r	29m	R	663.1.png'
'h10r_29m_R_657.0.png'	12.0403	2.4973	8.0832	2.5694	0.7795	0.6603	0.0292	14.7154	8.7655	'h10r	29m	R	657.0.png'
'i00S_29m_R_660.7.png'	31.1278	6.2173	20.4361	8.8004	0.819	0.6862	0.0207	37.7522	22.0298	'i00S	29m	R	660.7.png'
'i05r_29m_R_666.1.png'	14.8048	3.4366	10.1856	3.4847	0.7922	0.679	0.0378	18.2959	10.8698	'i05r	29m	R	666.1.png'
'i10r_29m_R_669.2.png'	12.1647	2.4772	8.0684	2.5659	0.7636	0.6524	0.0156	14.806	8.7932	'i10r	29m	R	669.2.png'
'a00S_2-4_R_726.9.png'	-9.2006	-27.8995	-17.0789	-15.5481	0.8981	0.9931	0.1392	33.9812	-16.0088	'a00S	2024-02-04	R	726.9.png'
'a10r_2-4_R_790.0.png'	35.3309	4.2938	26.085	16.1696	0.8128	0.883	0.0162	44.1264	26.3528	'a10r	2024-02-04	R	790.0.png'
'b00S_2-4_R_825.4.png'	-12.6169	-37.2965	-22.9944	-21.2519	0.9135	0.9667	0.153	45.5956	-21.5731	'b00S	2024-02-04	R	825.4.png'
'b10r_2-4_R_811.6.png'	35.8866	4.5128	26.6119	16.246	0.8171	0.8908	0.0164	44.9044	26.8551	'b10r	2024-02-04	R	811.6.png'
'c00S_2-4_R_801.5.png'	-13.8098	-41.025	-25.1808	-23.1209	0.9139	0.9801	0.1543	50.0783	-23.6493	'c00S	2024-02-04	R	801.5.png'
'c10r_2-4_R_802.7.png'];	35.5903	4.3249	26.3395	16.1471	0.813	0.8878	0.0145	44.4876	26.586	'c10r	2024-02-04	R	802.7.png'];

## Sheet: Parse Raw Data
82	'a00S_2-4_B_851.1.png'	'a00S	2024-02-04	B	851.1.png'	3	'a	0	S
84	'b00S_2-4_B_854.8.png'	'b00S	2024-02-04	B	854.8.png'	14	'b	0	S
86	'c00S_2-4_B_850.7.png'	'c00S	2024-02-04	B	850.7.png'	25	'c	0	S
83	'a10b_2-4_B_895.8.png'	'a10b	2024-02-04	B	895.8.png'	6	'a	10	b
85	'b10b_2-4_B_929.6.png'	'b10b	2024-02-04	B	929.6.png'	17	'b	10	b
87	'c10b_2-4_B_941.5.png'	'c10b	2024-02-04	B	941.5.png'	28	'c	10	b
59	'a00S_2-4_F_788.1.png'	'a00S	2024-02-04	F	788.1.png'	2	'a	0	S
61	'b00S_2-4_F_748.0.png'	'b00S	2024-02-04	F	748.0.png'	13	'b	0	S
63	'c00S_2-4_F_837.0.png'	'c00S	2024-02-04	F	837.0.png'	24	'c	0	S
60	'a10f_2-4_F_926.3.png'	'a10f	2024-02-04	F	926.3.png'	7	'a	10	f
62	'b10f_2-4_F_916.1.png'	'b10f	2024-02-04	F	916.1.png'	18	'b	10	f
64	'c10f_2-4_F_926.0.png'	'c10f	2024-02-04	F	926.0.png'	29	'c	10	f
106	'a00S_2-4_L_807.0.png'	'a00S	2024-02-04	L	807.0.png'	4	'a	0	S
108	'b00S_2-4_L_748.0.png'	'b00S	2024-02-04	L	748.0.png'	15	'b	0	S
110	'c00S_2-4_L_777.1.png'	'c00S	2024-02-04	L	777.1.png'	26	'c	0	S
107	'a10l_2-4_L_734.0.png'	'a10l	2024-02-04	L	734.0.png'	9	'a	10	l
109	'b10l_2-4_L_655.5.png'	'b10l	2024-02-04	L	655.5.png'	20	'b	10	l
111	'c10l_2-4_L_705.7.png'	'c10l	2024-02-04	L	705.7.png'	31	'c	10	l
130	'a00S_2-4_R_726.9.png'	'a00S	2024-02-04	R	726.9.png'	5	'a	0	S
132	'b00S_2-4_R_825.4.png'	'b00S	2024-02-04	R	825.4.png'	16	'b	0	S
134	'c00S_2-4_R_801.5.png'	'c00S	2024-02-04	R	801.5.png'	27	'c	0	S
131	'a10r_2-4_R_790.0.png'	'a10r	2024-02-04	R	790.0.png'	11	'a	10	r
133	'b10r_2-4_R_811.6.png'	'b10r	2024-02-04	R	811.6.png'	22	'b	10	r
135	'c10r_2-4_R_802.7.png'];	'c10r	2024-02-04	R	802.7.png'];	33	'c	10	r
33	'a00H_2-4_T_354.2.png'	'a00H	2024-02-04	T	354.2.png'	1	'a	0	H
36	'b00H_2-4_T_355.3.png'	'b00H	2024-02-04	T	355.3.png'	12	'b	0	H
39	'c00H_2-4_T_354.5.png'	'c00H	2024-02-04	T	354.5.png'	23	'c	0	H
32	'a10l_2-4_T_364.7.png'	'a10l	2024-02-04	T	364.7.png'	8	'a	10	l
34	'a10r_2-4_T_356.2.png'	'a10r	2024-02-04	T	356.2.png'	10	'a	10	r
35	'b10l_2-4_T_363.5.png'	'b10l	2024-02-04	T	363.5.png'	19	'b	10	l
37	'b10r_2-4_T_354.3.png'	'b10r	2024-02-04	T	354.3.png'	21	'b	10	r
38	'c10l_2-4_T_365.0.png'	'c10l	2024-02-04	T	365.0.png'	30	'c	10	l
40	'c10r_2-4_T_354.9.png'	'c10r	2024-02-04	T	354.9.png'	32	'c	10	r
74	'g00S_29m_B_778.1.png'	'g00S	29m	B	778.1.png'	3	'g	0	S
77	'h00S_29m_B_830.9.png'	'h00S	29m	B	830.9.png'	20	'h	0	S
79	'i00S_29m_B_818.0.png'	'i00S	29m	B	818.0.png'	36	'i	0	S
75	'g05b_29m_B_606.1.png'	'g05b	29m	B	606.1.png'	6	'g	5	b
78	'h05b_29m_B_609.0.png'	'h05b	29m	B	609.0.png'	23	'h	5	b
80	'i05b_29m_B_615.1.png'	'i05b	29m	B	615.1.png'	39	'i	5	b
76	'g10b_29m_B_594.1.png'	'g10b	29m	B	594.1.png'	12	'g	10	b
81	'i10b_29m_B_597.0.png'	'i10b	29m	B	597.0.png'	45	'i	10	b
50	'g00S_29m_F_672.5.png'	'g00S	29m	F	672.5.png'	2	'g	0	S
53	'h00S_29m_F_687.0.png'	'h00S	29m	F	687.0.png'	19	'h	0	S
56	'i00S_29m_F_687.1.png'	'i00S	29m	F	687.1.png'	35	'i	0	S
51	'g05f_29m_F_651.0.png'	'g05f	29m	F	651.0.png'	7	'g	5	f
54	'h05f_29m_F_672.4.png'	'h05f	29m	F	672.4.png'	24	'h	5	f
57	'i05f_29m_F_672.1.png'	'i05f	29m	F	672.1.png'	40	'i	5	f
52	'g10f_29m_F_606.1.png'	'g10f	29m	F	606.1.png'	13	'g	10	f
55	'h10f_29m_F_591.0.png'	'h10f	29m	F	591.0.png'	29	'h	10	f
58	'i10f_29m_F_624.2.png'	'i10f	29m	F	624.2.png'	46	'i	10	f
97	'g00S_29m_L_717.2.png'	'g00S	29m	L	717.2.png'	4	'g	0	S
100	'h00S_29m_L_702.2.png'	'h00S	29m	L	702.2.png'	21	'h	0	S
103	'i00S_29m_L_726.4.png'	'i00S	29m	L	726.4.png'	37	'i	0	S
98	'g05l_29m_L_711.0.png'	'g05l	29m	L	711.0.png'	9	'g	5	l
101	'h05l_29m_L_693.0.png'	'h05l	29m	L	693.0.png'	26	'h	5	l
104	'i05l_29m_L_693.1.png'	'i05l	29m	L	693.1.png'	42	'i	5	l
99	'g10l_29m_L_774.3.png'	'g10l	29m	L	774.3.png'	15	'g	10	l
102	'h10l_29m_L_771.1.png'	'h10l	29m	L	771.1.png'	31	'h	10	l
105	'i10l_29m_L_759.1.png'	'i10l	29m	L	759.1.png'	48	'i	10	l
121	'g00S_29m_R_642.3.png'	'g00S	29m	R	642.3.png'	5	'g	0	S
124	'h00S_29m_R_681.2.png'	'h00S	29m	R	681.2.png'	22	'h	0	S
127	'i00S_29m_R_660.7.png'	'i00S	29m	R	660.7.png'	38	'i	0	S
122	'g05r_29m_R_636.0.png'	'g05r	29m	R	636.0.png'	11	'g	5	r
125	'h05r_29m_R_663.1.png'	'h05r	29m	R	663.1.png'	28	'h	5	r
128	'i05r_29m_R_666.1.png'	'i05r	29m	R	666.1.png'	44	'i	5	r
123	'g10r_29m_R_660.0.png'	'g10r	29m	R	660.0.png'	17	'g	10	r
126	'h10r_29m_R_657.0.png'	'h10r	29m	R	657.0.png'	33	'h	10	r
129	'i10r_29m_R_669.2.png'	'i10r	29m	R	669.2.png'	50	'i	10	r
4	'g00H_29m_T_285.2.png'	'g00H	29m	T	285.2.png'	1	'g	0	H
9	'h00H_29m_T_288.5.png'	'h00H	29m	T	288.5.png'	18	'h	0	H
14	'i00H_29m_T_290.4.png'	'i00H	29m	T	290.4.png'	34	'i	0	H
3	'g05l_29m_T_280.6.png'	'g05l	29m	T	280.6.png'	8	'g	5	l
5	'g05r_29m_T_274.3.png'	'g05r	29m	T	274.3.png'	10	'g	5	r		51
8	'h05l_29m_T_276.7.png'	'h05l	29m	T	276.7.png'	25	'h	5	l
10	'h05r_29m_T_280.3.png'	'h05r	29m	T	280.3.png'	27	'h	5	r
13	'i05l_29m_T_283.8.png'	'i05l	29m	T	283.8.png'	41	'i	5	l
15	'i05r_29m_T_280.2.png'	'i05r	29m	T	280.2.png'	43	'i	5	r
2	'g10l_29m_T_276.6.png'	'g10l	29m	T	276.6.png'	14	'g	10	l
6	'g10r_29m_T_282.3.png'	'g10r	29m	T	282.3.png'	16	'g	10	r
7	'h10l_29m_T_276.8.png'	'h10l	29m	T	276.8.png'	30	'h	10	l
11	'h10r_29m_T_279.2.png'	'h10r	29m	T	279.2.png'	32	'h	10	r
12	'i10l_29m_T_279.0.png'	'i10l	29m	T	279.0.png'	47	'i	10	l
16	'i10r_29m_T_281.3.png'	'i10r	29m	T	281.3.png'	49	'i	10	r
65	'a00S_30m_B_651.6.png'	'a00S	30m	B	651.6.png'	2	'a	0	S
68	'b00S_30m_B_639.0.png'	'b00S	30m	B	639.0.png'	14	'b	0	S
71	'c00S_30m_B_621.5.png'	'c00S	30m	B	621.5.png'	26	'c	0	S
66	'a05b_30m_B_634.6.png'	'a05b	30m	B	634.6.png'	5	'a	5	b
69	'b05b_30m_B_611.8.png'	'b05b	30m	B	611.8.png'	17	'b	5	b
72	'c05b_30m_B_640.0.png'	'c05b	30m	B	640.0.png'	29	'c	5	b
67	'a10b_30m_B_723.4.png'	'a10b	30m	B	723.4.png'	9	'a	10	b
70	'b10b_30m_B_720.6.png'	'b10b	30m	B	720.6.png'	21	'b	10	b
73	'c10b_30m_B_717.9.png'	'c10b	30m	B	717.9.png'	33	'c	10	b
41	'a00S_30m_F_624.9.png'	'a00S	30m	F	624.9.png'	1	'a	0	S
44	'b00S_30m_F_650.9.png'	'b00S	30m	F	650.9.png'	13	'b	0	S
47	'c00S_30m_F_637.5.png'	'c00S	30m	F	637.5.png'	25	'c	0	S
42	'a05f_30m_F_633.7.png'	'a05f	30m	F	633.7.png'	6	'a	5	f
45	'b05f_30m_F_611.2.png'	'b05f	30m	F	611.2.png'	18	'b	5	f
48	'c05f_30m_F_612.4.png'	'c05f	30m	F	612.4.png'	30	'c	5	f
43	'a10f_30m_F_781.4.png'	'a10f	30m	F	781.4.png'	10	'a	10	f
46	'b10f_30m_F_724.8.png'	'b10f	30m	F	724.8.png'	22	'b	10	f
49	'c10f_30m_F_718.1.png'	'c10f	30m	F	718.1.png'	34	'c	10	f
88	'a00S_30m_L_625.8.png'	'a00S	30m	L	625.8.png'	3	'a	0	S
91	'b00S_30m_L_630.0.png'	'b00S	30m	L	630.0.png'	15	'b	0	S
94	'c00S_30m_L_639.2.png'	'c00S	30m	L	639.2.png'	27	'c	0	S
89	'a05l_30m_L_647.2.png'	'a05l	30m	L	647.2.png'	7	'a	5	l
92	'b05l_30m_L_605.2.png'	'b05l	30m	L	605.2.png'	19	'b	5	l
95	'c05l_30m_L_613.2.png'	'c05l	30m	L	613.2.png'	31	'c	5	l
90	'a10l_30m_L_698.3.png'	'a10l	30m	L	698.3.png'	11	'a	10	l
93	'b10l_30m_L_703.1.png'	'b10l	30m	L	703.1.png'	23	'b	10	l
96	'c10l_30m_L_689.8.png'	'c10l	30m	L	689.8.png'	35	'c	10	l
112	'a00S_30m_R_626.2.png'	'a00S	30m	R	626.2.png'	4	'a	0	S
115	'b00S_30m_R_637.0.png'	'b00S	30m	R	637.0.png'	16	'b	0	S
118	'c00S_30m_R_617.9.png'	'c00S	30m	R	617.9.png'	28	'c	0	S
113	'a05r_30m_R_797.3.png'	'a05r	30m	R	797.3.png'	8	'a	5	r
116	'b05r_30m_R_795.7.png'	'b05r	30m	R	795.7.png'	20	'b	5	r
119	'c05r_30m_R_794.9.png'	'c05r	30m	R	794.9.png'	32	'c	5	r
114	'a10r_30m_R_721.9.png'	'a10r	30m	R	721.9.png'	12	'a	10	r
117	'b10r_30m_R_706.6.png'	'b10r	30m	R	706.6.png'	24	'b	10	r
120	'c10r_30m_R_731.6.png'	'c10r	30m	R	731.6.png'	36	'c	10	r
19	'd00H_30m_T_270.0.png'	'd00H	30m	T	270.0.png'	37	'd	0	H
24	'e00H_30m_T_269.9.png'	'e00H	30m	T	269.9.png'	42	'e	0	H
29	'f00H_30m_T_274.0.png'	'f00H	30m	T	274.0.png'	47	'f	0	H
18	'd05l_30m_T_280.0.png'	'd05l	30m	T	280.0.png'	38	'd	5	l
20	'd05r_30m_T_268.2.png'	'd05r	30m	T	268.2.png'	39	'd	5	r
23	'e05l_30m_T_277.1.png'	'e05l	30m	T	277.1.png'	43	'e	5	l
25	'e05r_30m_T_275.4.png'	'e05r	30m	T	275.4.png'	44	'e	5	r
28	'f05l_30m_T_281.1.png'	'f05l	30m	T	281.1.png'	48	'f	5	l
30	'f05r_30m_T_266.2.png'	'f05r	30m	T	266.2.png'	49	'f	5	r
17	'd10l_30m_T_274.0.png'	'd10l	30m	T	274.0.png'	40	'd	10	l
21	'd10r_30m_T_268.4.png'	'd10r	30m	T	268.4.png'	41	'd	10	r
22	'e10l_30m_T_273.4.png'	'e10l	30m	T	273.4.png'	45	'e	10	l
26	'e10r_30m_T_273.8.png'	'e10r	30m	T	273.8.png'	46	'e	10	r
27	'f10l_30m_T_276.0.png'	'f10l	30m	T	276.0.png'	50	'f	10	l
31	'f10r_30m_T_267.6.png'	'f10r	30m	T	267.6.png'	51	'f	10	r
1

## Sheet: Top 
	Red Contrast																Blue contrast																Green Contrast																Yellow Contrast
	Images (-10,-5,0,5,10)															CV	Images (-10,-5,0,5,10)															CV	Images (-10,-5,0,5,10)															CV	Images (-10,-5,0,5,10)
MN29m	62.3406	59.4901	63.7413	49.9387	60.5862	62.5219	58.801	64.4697	47.9597	59.824	61.9746	60.4424	64.1946	48.3086	59.5086	0.0946664	6.4298	6.9977	7.2518	9.6946	6.7333	6.9023	6.5364	7.8525	8.6723	6.5979	6.6138	6.5126	7.5823	9.1958	6.4026	0.14528	42.4105	40.8784	41.2476	35.9472	41.6659	42.6111	40.0534	42.0228	34.2859	41.1047	42.08	41.249	41.9467	34.9313	40.6792	0.0688556	10.6572
MN30m	94.1982	90.1093	103.474	96.0882	96.2194	92.5888	90.7294	102.949	96.6643	96.2304	94.508	90.039	103.364	96.758	94.4978	0.0463612	36.7458	36.0738	40.4599	38.5315	38.6392	36.0683	36.3659	38.083	38.8941	38.1146	36.741	36.5021	40.9072	39.4711	38.0279	0.0408453	78.1496	74.1988	83.1115	80.1147	80.3815	77.1847	74.8879	80.9464	79.9657	79.3405	79.0706	74.2915	82.8968	80.0353	78.6052	0.0350875	51.1238
MN2-4	94.2049	108.68	83.7986	96.9003	110.603	82.2665	97.0534	108.473	83.1195							0.118504	21.0514	24.5875	21.1432	21.0603	23.4049	20.1108	21.1899	24.3176	20.9194							0.0753655	78.5272	92.2056	73.4963	79.7321	95.5536	71.8395	79.8699	92.4132	73.0498							0.112094	27.1617
															Total CV	0.0865106															Total CV	0.0871637															Total CV	0.0720122
[truncated: 95 more columns]

## Sheet: Front
	Red Contrast										Blue Contrast										Green Contrast										Yellow Contrast										Centrality Ratio
	Images (0,5,10)									CV	Images (0,5,10)									CV	Images (0,5,10)									CV	Images (0,5,10)									CV	Images (0,5,10)
MN29m	107.478	78.9083	57.378	107.38	79.474	57.4788	108.699	78.8195	57.6266	0.268608	35.2818	34.05	26.3067	34.7386	34.3555	26.3169	35.3978	34.0073	26.4365	0.130822	84.9471	70.0495	50.2709	84.748	70.3062	50.0696	86.0103	69.8217	50.4599	0.221689	59.956	51.9973	34.3726	59.8537	52.1851	34.5819	60.5149	51.8465	34.6709	0.231508	0.7749	0.7774	0.7754	0.7809	0.7773	0.7779	0.7807	0.7751	0.786
MN30m	54.7	22.7871	23.6287	39.6274	23.6088	22.4713	42.5756	22.5017	23.158	0.392518	1.0234	3.2629	4.0922	3.7079	4.0088	4.0841	3.0232	4.165	4.3321	0.293363	32.1079	14.411	14.5566	24.3556	14.5189	14.0172	25.6905	14.0419	14.5504	0.365997	5.6721	3.7473	4.6025	6.4871	4.5326	4.5727	6.468	4.6431	4.7738	0.186313	0.713	0.6957	0.6826	0.7227	0.6926	0.7039	0.7051	0.6911	0.6989
MN2-4	67.2126	82.8757	66.9302	80.7551	64.9419	83.0525				0.117947	-6.9817	15.0852	-6.6987	14.6352	-5.264	15.0072				2.70884	44.7336	60.1296	44.4498	59.0433	43.1572	60.1314				0.165573	23.1907	22.0821	22.8273	21.8504	23.3486	21.8174				0.0305378	0.9476	0.8821	0.9363	0.8818	0.9382	0.8847
									Total CV	0.259691									Total CV	1.04434									Total CV	0.251086									Total CV	0.149453									Total CV
[truncated: 41 more columns]

## Sheet: Back 
	Red Contrast										Blue Contrast										Green Contrast										Yellow Contrast										Centrality Ratio
	Images (0,5,10)									CV	Images (0,5,10)									CV	Images (0,5,10)									CV	Images (0,5,10)									CV	Images (0,5,10)
MN29m	50.1667	11.6854	17.7568	50.2853	12.737	18.1533	50.5187	12.9266	18.5631	0.655672	21.7432	5.5926	8.235	21.8054	6.0182	8.3371	22.0362	6.1568	8.4825	0.617601	39.9239	9.9609	14.6285	40.1371	10.8262	14.9201	40.1538	11.0539	15.2922	0.629792	22.9972	5.7295	8.3976	23.0452	6.1469	8.5029	23.3004	6.2799	8.6573	0.635896	0.8777	0.8383	0.8399	0.8853	0.8521	0.8646	0.8793	0.8489	0.8669
MN30m	29.011	20.5246	20.8069	35.4606	20.7775	34.5248	21.2415	21.3071		0.256205	7.5544	4.9182	5.3179	9.018	4.6416	8.9148	4.8647	4.9746		0.30255	18.3231	12.66	13.0052	22.4381	12.5432	22.0034	12.7915	12.9063		0.276946	8.0505	4.9821	5.4736	9.7147	4.7227	9.5346	4.9259	5.1154		0.329853	0.6845	0.6793	0.6669	0.6692	0.6801	0.675	0.6828	0.6861
MN2-4	32.2149	31.9937	32.3255	30.8868	31.6386	30.1744				0.0268277	12.4096	12.689	12.2403	12.3985	11.9652	11.9441				0.0233704	27.6372	27.4281	27.6796	26.3622	27.2724	25.6969				0.0297506	13.8463	15.6366	13.7145	15.1407	13.4746	14.7986				0.0608842	0.7732	0.7811	0.7792	0.7763	0.774	0.7878
									Total CV	0.312902									Total CV	0.314507									Total CV	0.312163									Total CV	0.342211									Total CV
[truncated: 41 more columns]

## Sheet: Left
	Red Contrast										Blue Contrast										Green Contrast										Yellow Contrast										Centrality Ratio
	Images (0,5,10)									CV	Images (0,5,10)									CV	Images (0,5,10)									CV	Images (0,5,10)									CV	Images (0,5,10)
MN29m	38.5054	19.3496	10.0831	36.9335	19.5969	10.4598	37.918	18.8027	10.7225	0.538305	1.6321	0.0176	-5.5853	0.3058	-0.0797	-5.304	0.8518	-0.8722	-5.1347	-1.84699	25.1095	13.6023	4.6889	23.6348	13.6563	5.1001	24.5886	12.8091	5.3388	0.591208	14.5277	7.2468	1.2529	13.3325	7.2588	1.43	13.8535	6.5158	1.6874	0.726132	0.8622	0.8263	0.8297	0.8807	0.8296	0.8193	0.8695	0.8352	0.8219
MN30m	39.3138	23.7644	21.5008	36.5956	23.6648	21.8223	35.8081	23.7306	20.6869	0.273038	5.2445	4.4604	3.8226	5.3854	4.4865	3.8549	5.0307	4.4674	3.8634	0.133448	26.9554	15.7074	13.7279	24.995	15.61	13.8622	24.4319	15.5599	13.2771	0.30321	8.1828	4.8122	3.9893	8.1512	4.7837	4.0079	7.6592	4.8058	3.9832	0.328707	0.8408	0.8389	0.8062	0.8438	0.8449	0.8114	0.8407	0.8432	0.8081
MN2-4	-1.2709	36.0676	13.534	36.3269	14.9963	38.7545				0.70948	-29.5962	5.8777	-16.6142	8.6561	-17.5395	7.938				-2.38676	-12.5159	26.6581	2.6065	27.6681	3.1002	29.1502				1.36421	-13.3744	16.5127	-2.7709	17.2959	-2.8523	17.9315				2.47129	0.8016	0.8276	0.7768	0.8234	0.778	0.8302
									Total CV	0.506941									Total CV	-1.36677									Total CV	0.752876									Total CV	1.17538									Total CV
[truncated: 41 more columns]

## Sheet: RIght
	Red Contrast										Blue Contrast										Green Contrast										Yellow Contrast										Centrality Ratio
	Images (0,5,10)									CV	Images (0,5,10)									CV	Images (0,5,10)									CV	Images (0,5,10)									CV	Images (0,5,10)
MN29m	39.9918	19.7449	11.9361	41.0109	23.4164	11.2484	40.8896	23.3056	12.0824	0.511652	3.3387	5.53	-2.0564	4.2119	8.1757	-2.812	3.8838	8.0201	-2.0186	1.45952	27.6418	15.8617	7.7906	28.5833	19.3891	7.0296	28.3863	19.2538	7.9011	0.500304	16.3532	9.591	3.4374	17.1551	12.0741	2.8608	16.7773	11.8984	3.5696	0.56755	0.961	0.8493	0.9698	0.9523	0.8401	0.985	0.9478	0.8343	0.9924
MN30m	31.282	15.7382	12.105	30.7726	14.966	12.0403	31.1278	14.8048	12.1647	0.453457	6.2108	3.9286	2.7107	5.8385	3.4725	2.4973	6.2173	3.4366	2.4772	0.386366	20.8441	10.7096	8.2622	20.1569	10.3644	8.0832	20.4361	10.1856	8.0684	0.437357	8.6407	4.0339	2.7756	8.4467	3.5255	2.5694	8.8004	3.4847	2.5659	0.557641	0.8385	0.7898	0.7864	0.831	0.7889	0.7795	0.819	0.7922	0.7636
MN2-4	-9.2006	35.3309	-12.6169	35.8866	-13.8098	35.5903				2.19579	-27.8995	4.2938	-37.2965	4.5128	-41.025	4.3249				-1.43131	-17.0789	26.085	-22.9944	26.6119	-25.1808	26.3395				11.5267	-15.5481	16.1696	-21.2519	16.246	-23.1209	16.1471				-10.5454	0.8981	0.8128	0.9135	0.8171	0.9139	0.813
									Total CV	1.05363									Total CV	0.138192									Total CV	4.15477									Total CV	-3.14008									Total CV
[truncated: 41 more columns]

## Sheet: Averages
	Pattern measurement	Angle CV,	Angle CV, Front View	Angle CV, Back View	Angle CV, Left View	Angle CV, Right View	Angle CV, Across Views	STDEV, Across Views
		Top View
	Mean Eccentricity	0.0369	0.0494	0.0376	0.0504	0.0335	0.04156	0.00777772
	Euclidean Distance	0.078	0.2517	0.3109	0.3811	0.3549	0.27532	0.120708
	Intensity Ratio	0.076	0.2551	0.3114	0.7096	0.3103	0.33248	0.2318
	Average Area of Objects	0.1027	0.4284	0.2948	0.2948	0.4013	0.3044	0.128095
	Red Contrast	0.0865	0.2597	0.3129	0.5069	1.054	0.444	0.372497
	Blue Contrast	0.0872	1.044	0.3145	-1.3668	0.1382	0.04342	0.876679
	Green Contrast	0.072	0.251	0.3121	0.7529	4.1548	1.10856	1.72121
	Yellow Contrast	0.1429	0.1494	0.3422	1.1754	-3.14	-0.26602	1.66186
	Centrality Ratio	0.0091	0.019	0.0125	0.026	0.054	0.02412	0.0179108
	Occupation Factor	0.0144	0.0497	0.0645	0.0355	0.0371	0.04024	0.0185612
	Normalized Offset	0.1287	0.4575	0.2709	0.4751	0.676	0.40164	0.209392

## Sheet: Visual
	WS Name	Average Views
	Centrality Ratio	0.02412	0.0179108
	Occupation Factor	0.04024	0.0185612
	Mean Eccentricity	0.04156	0.00777772
	Euclidean Distance	0.27532	0.120708
	Average Area of Objects	0.3044	0.128095
	Intensity Ratio	0.33248	0.2318
	Normalized Offset	0.40164	0.209392
