# Supplementary material for: New approaches for capturing and estimating variation in complex animal color patterns from digital photographs: application to the Eastern Box Turtle (Terrapene carolina)
Source: PeerJ journal article supplement (doi:10.7717/peerj.19690), 2025-07-21
Supplement: PeerJ_All_DataAnalysisFiles.zip [file PeerJ_Data_Between_Individual_Variation_Figure7.xlsx]

## Sheet: Fractional Area
	Top view front		Mean +/-SD		CV	Right side		Mean +/-SD		CV	Left side		Mean +/-SD		CV	Front		Mean +/-SD		CV	Back		Mean +/-SD		CV
Indiv	image 1	image 2	mean	sd		Image 1	Image2	mean	sd		Image 1	Image2	mean	sd		Image 1	Image2	mean	sd		Image 1	Image2	mean	sd		MEAN				MEAN Views	STD Views	CV Views
17923	0.394	0.408	0.401	0.00989949	0.024687	0.3239	0.3464	0.33515	0.0159099	0.047471	0.3703	0.3751	0.3727	0.00339411	0.00910682	0.3489	0.3213	0.3351	0.0195161	0.0582398	0.4036	0.3923	0.39795	0.00799031	0.0200787	0.36838	0.36838			0.36838	0.0322835	0.0876365
20544	0.3602	0.3666	0.3634	0.00452548	0.0124532	0.3951	0.4062	0.40065	0.00784889	0.0195904	0.3902	0.3896	0.3899	0.000424264	0.00108814	0.2955	0.2965	0.296	0.000707107	0.00238887	0.3286	0.3527	0.34065	0.0170413	0.0500258	0.35812				0.35812	0.0418651	0.116902
22468	0.3649	0.3735	0.3692	0.00608112	0.0164711	0.4556	0.459	0.4573	0.00240416	0.0052573	0.4598	0.4553	0.45755	0.00318198	0.00695439	0.3591	0.3582	0.35865	0.000636396	0.00177442	0.299	0.3068	0.3029	0.00551543	0.0182088	0.38912				0.38912	0.0672501	0.172826
22609	0.3891	0.3921	0.3906	0.00212132	0.00543093	0.401	0.4043	0.40265	0.00233345	0.00579524	0.4059	0.3996	0.40275	0.00445477	0.0110609	0.3053	0.3063	0.3058	0.000707107	0.00231232	0.3799	0.3964	0.38815	0.0116673	0.0300586	0.37799				0.37799	0.0409109	0.108233
22612	0.2839	0.2519	0.2679	0.0226274	0.0844622	0.3146	0.3114	0.313	0.00226274	0.00722921	0.3814	0.4044	0.3929	0.0162635	0.0413934	0.179	0.2145	0.19675	0.0251023	0.127585	0.294	0.2692	0.2816	0.0175362	0.0622736	0.29043				0.29043	0.0713635	0.245717
22613	0.2786	0.2812	0.2799	0.00183848	0.00656834	0.2773	0.2823	0.2798	0.00353553	0.0126359	0.2106	0.2219	0.21625	0.00799031	0.0369494	0.2065	0.2116	0.20905	0.00360624	0.0172506	0.3957	0.3771	0.3864	0.0131522	0.0340377	0.27428				0.27428	0.0711607	0.259445
22614	0.2979	0.3046	0.30125	0.00473762	0.0157265	0.2863	0.2857	0.286	0.000424264	0.00148344	0.3264	0.3218	0.3241	0.00325269	0.0100361	0.2326	0.2461	0.23935	0.00954594	0.0398828	0.3691	0.388	0.37855	0.0133643	0.035304	0.30585				0.30585	0.0511268	0.167163
27761	0.2919	0.3204	0.30615	0.0201525	0.0658257	0.3607	0.358	0.35935	0.00190919	0.00531289	0.3455	0.3501	0.3478	0.00325269	0.00935219	0.2707	0.2794	0.27505	0.00615183	0.0223662	0.2978	0.2869	0.29235	0.00770746	0.0263638	0.31614				0.31614	0.0361373	0.114308
36684	0.3437	0.3395	0.3416	0.00296985	0.00869394	0.3566	0.3598	0.3582	0.00226274	0.00631698	0.3367	0.3355	0.3361	0.000848528	0.00252463	0.3154	0.3082	0.3118	0.00509117	0.0163283	0.3005	0.3051	0.3028	0.00325269	0.010742	0.3301				0.3301	0.0225723	0.0683803
42824	0.3172	0.3094	0.3133	0.00551543	0.0176043	0.3697	0.3739	0.3718	0.00296985	0.00798776	0.369	0.3726	0.3708	0.00254558	0.00686511	0.2282	0.2197	0.22395	0.00601041	0.0268382	0.3309	0.3422	0.33655	0.00799031	0.0237418	0.32328				0.32328	0.060734	0.187868
42825	0.3427	0.342	0.34235	0.000494975	0.00144581	0.2967	0.2913	0.294	0.00381838	0.0129877	0.3083	0.3056	0.30695	0.00190919	0.00621987	0.3119	0.3095	0.3107	0.00169706	0.00546204	0.3244	0.3201	0.32225	0.00304056	0.0094354	0.31525				0.31525	0.0181973	0.0577234
45769	0.38	0.3748	0.3774	0.00367696	0.00974286	0.4042	0.4031	0.40365	0.000777817	0.00192696	0.3637	0.3697	0.3667	0.00424264	0.0115698	0.3597	0.3651	0.3624	0.00381838	0.0105364	0.3333	0.348	0.34065	0.0103945	0.0305136	0.37016				0.37016	0.0230056	0.0621504
45779	0.2314	0.2459	0.23865	0.010253	0.0429627	0.3327	0.3367	0.3347	0.00282843	0.00845063	0.3052	0.2767	0.29095	0.0201525	0.0692646	0.2344	0.2656	0.25	0.0220617	0.0882469	0.3224	0.3451	0.33375	0.0160513	0.0480939	0.28961				0.28961	0.0451362	0.155852
49607	0.2318	0.2337	0.23275	0.0013435	0.0057723	0.2774	0.2823	0.27985	0.00346482	0.012381	0.2798	0.2944	0.2871	0.0103238	0.0359588	0.2387	0.2503	0.2445	0.00820244	0.0335478	0.343	0.3398	0.3414	0.00226274	0.00662783	0.27712				0.27712	0.0426372	0.153858
52615	0.2984	0.2994	0.2989	0.000707107	0.0023657	0.335	0.3358	0.3354	0.000565685	0.0016866	0.3218	0.3267	0.32425	0.00346482	0.0106857	0.2608	0.2637	0.26225	0.00205061	0.00781929	0.3044	0.3065	0.30545	0.00148492	0.00486143	0.30525				0.30525	0.0281042	0.0920695
65908	0.2918	0.3012	0.2965	0.0066468	0.0224176	0.3649	0.3732	0.36905	0.00586899	0.015903	0.362	0.3759	0.36895	0.00982878	0.0266399	0.2727	0.2862	0.27945	0.00954594	0.0341597	0.2887	0.275	0.28185	0.00968736	0.0343706	0.31916				0.31916	0.0459632	0.144013
139661	0.3406	0.3494	0.345	0.00622254	0.0180363	0.4613	0.4535	0.4574	0.00551543	0.0120582	0.3907	0.3781	0.3844	0.00890955	0.0231778	0.2892	0.2727	0.28095	0.0116673	0.0415279	0.2689	0.2468	0.25785	0.0156271	0.0606052	0.34512				0.34512	0.0804419	0.233084
141485	0.2026	0.1937	0.19815	0.00629325	0.03176	0.3011	0.2967	0.2989	0.00311127	0.0104091	0.2897	0.3091	0.2994	0.0137179	0.0458179	0.2423	0.2389	0.2406	0.00240416	0.00999237	0.288	0.2873	0.28765	0.000494975	0.00172075	0.26494				0.26494	0.0444687	0.167844
203066	0.267	0.2637	0.26535	0.00233345	0.00879387	0.335	0.3367	0.33585	0.00120208	0.00357922	0.329	0.3284	0.3287	0.000424264	0.00129073	0.2541	0.2639	0.259	0.00692965	0.0267554	0.2665	0.274	0.27025	0.0053033	0.0196237	0.29183				0.29183	0.0372218	0.127546
203309	0.2216	0.2145	0.21805	0.00502046	0.0230243	0.2431	0.2418	0.24245	0.000919239	0.00379146	0.2546	0.2658	0.2602	0.0079196	0.0304366	0.2309	0.2249	0.2279	0.00424264	0.0186162	0.2926	0.2949	0.29375	0.00162635	0.0055365	0.24847				0.24847	0.0298857	0.120279
288185	0.4184	0.3948	0.4066	0.0166877	0.0410421	0.374	0.3828	0.3784	0.00622254	0.0164443	0.3022	0.3344	0.3183	0.0227688	0.0715326	0.2755	0.261	0.26825	0.010253	0.038222	0.2775	0.2654	0.27145	0.00855599	0.0315196	0.3286				0.3286	0.0624067	0.189917
288186	0.3243	0.3139	0.3191	0.00735391	0.0230458	0.3652	0.342	0.3536	0.0164049	0.0463939	0.3444	0.3373	0.34085	0.00502046	0.0147292	0.3264	0.3043	0.31535	0.0156271	0.0495547	0.37	0.3791	0.37455	0.00643467	0.0171797	0.34069				0.34069	0.024604	0.0722183
288187	0.2349	0.2133	0.2241	0.0152735	0.0681549	0.3011	0.2895	0.2953	0.00820244	0.0277766	0.2695	0.251	0.26025	0.0130815	0.050265	0.2268	0.2074	0.2171	0.0137179	0.0631869	0.2304	0.235	0.2327	0.00325269	0.013978	0.24589				0.24589	0.0321139	0.130603
288189	0.2784	0.3038	0.2911	0.0179605	0.0616988	0.3169	0.3042	0.31055	0.00898026	0.0289173	0.2842	0.2819	0.28305	0.00162635	0.00574579	0.3118	0.3174	0.3146	0.0039598	0.0125868	0.3496	0.3443	0.34695	0.00374767	0.0108017	0.30925				0.30925	0.0248368	0.080313
288199	0.2188	0.232	0.2254	0.00933381	0.04141	0.2683	0.2793	0.2738	0.00777817	0.0284082	0.294	0.2865	0.29025	0.0053033	0.0182715	0.2168	0.2074	0.2121	0.0066468	0.0313381	0.3531	0.332	0.34255	0.01492	0.0435555	0.26882				0.26882	0.0524943	0.195277
288210	0.3161	0.3181	0.3171	0.00141421	0.00445983	0.3944	0.3696	0.382	0.0175362	0.0459064	0.395	0.4052	0.4001	0.00721249	0.0180267	0.2993	0.3005	0.2999	0.000848528	0.00282937	0.4071	0.3949	0.401	0.0086267	0.021513	0.36002				0.36002	0.0480245	0.133394
324296	0.2968	0.3043	0.30055	0.0053033	0.0176453	0.3786	0.3811	0.37985	0.00176777	0.00465386	0.3435	0.3464	0.34495	0.00205061	0.00594466	0.2177	0.212	0.21485	0.00403051	0.0187596	0.2605	0.2628	0.26165	0.00162635	0.00621573	0.30037				0.30037	0.0654167	0.217787
326308	0.2634	0.2716	0.2675	0.00579828	0.0216758	0.3163	0.3072	0.31175	0.00643467	0.0206405	0.2993	0.3033	0.3013	0.00282843	0.00938741	0.2767	0.2822	0.27945	0.00388909	0.0139169	0.2944	0.3039	0.29915	0.00671751	0.0224553	0.29183				0.29183	0.0179254	0.0614242
497193	0.2697	0.261	0.26535	0.00615183	0.0231838	0.3167	0.3048	0.31075	0.00841457	0.0270783	0.2761	0.2766	0.27635	0.000353553	0.00127937	0.2713	0.2883	0.2798	0.0120208	0.0429622	0.3217	0.3262	0.32395	0.00318198	0.00982244	0.29124				0.29124	0.024867	0.085383
497202	0.3586	0.3655	0.36205	0.00487904	0.0134761	0.3369	0.3396	0.33825	0.00190919	0.00564431	0.3801	0.3873	0.3837	0.00509117	0.0132686	0.3744	0.3576	0.366	0.0118794	0.0324574	0.3933	0.3894	0.39135	0.00275772	0.00704668	0.36827				0.36827	0.0207112	0.0562391
497203	0.1473	0.1532	0.15025	0.00417193	0.0277666	0.2339	0.2348	0.23435	0.000636396	0.00271558	0.1777	0.2123	0.195	0.0244659	0.125466	0.2084	0.1989	0.20365	0.00671751	0.0329856	0.2197	0.2186	0.21915	0.000777817	0.00354925	0.20048				0.20048	0.0318547	0.158892
497237	0.2697	0.275	0.27235	0.00374767	0.0137605	0.2763	0.2763	0.2763	0	0	0.2667	0.2762	0.27145	0.00671751	0.0247468	0.2458	0.2252	0.2355	0.0145664	0.0618531	0.2878	0.3239	0.30585	0.0255266	0.083461	0.27229				0.27229	0.0249828	0.0917508
497243	0.2061	0.201	0.20355	0.00360624	0.0177168	0.2885	0.2968	0.29265	0.00586899	0.0200546	0.2867	0.2858	0.28625	0.000636396	0.00222322	0.1803	0.1889	0.1846	0.00608112	0.0329421	0.2286	0.2325	0.23055	0.00275772	0.0119615	0.23952				0.23952	0.0484691	0.202359
497248	0.3666	0.3499	0.35825	0.0118087	0.0329621	0.2736	0.266	0.2698	0.00537401	0.0199185	0.287	0.2828	0.2849	0.00296985	0.0104242	0.3066	0.3038	0.3052	0.0019799	0.00648722	0.3304	0.3288	0.3296	0.00113137	0.00343256	0.30955				0.30955	0.0352856	0.11399
497251	0.3199	0.3187	0.3193	0.000848528	0.00265746	0.3393	0.3438	0.34155	0.00318198	0.00931629	0.359	0.3579	0.35845	0.000777817	0.00216995	0.3271	0.3214	0.32425	0.00403051	0.0124303	0.4278	0.4417	0.43475	0.00982878	0.0226079	0.35566				0.35566	0.0468261	0.13166
497252	0.2876	0.2835	0.28555	0.00289914	0.0101528	0.2853	0.2924	0.28885	0.00502046	0.0173808	0.2983	0.2942	0.29625	0.00289914	0.00978612	0.2579	0.2555	0.2567	0.00169706	0.00661105	0.3447	0.341	0.34285	0.0026163	0.00763102	0.29404				0.29404	0.0311472	0.105928
497261	0.1797	0.1913	0.1855	0.00820244	0.044218	0.2719	0.2869	0.2794	0.0106066	0.0379621	0.2881	0.2868	0.28745	0.000919239	0.00319791	0.1901	0.1643	0.1772	0.0182434	0.102953	0.2792	0.3146	0.2969	0.0250316	0.0843098	0.24529				0.24529	0.05877	0.239594
497272	0.2397	0.2361	0.2379	0.00254558	0.0107002	0.3057	0.2972	0.30145	0.00601041	0.0199383	0.2868	0.2954	0.2911	0.00608112	0.0208901	0.2061	0.2054	0.20575	0.000494975	0.00240571	0.3038	0.2967	0.30025	0.00502046	0.0167209	0.26729				0.26729	0.0432178	0.161689
497276	0.16	0.1667	0.16335	0.00473762	0.0290028	0.2577	0.2486	0.25315	0.00643467	0.0254184	0.2467	0.2525	0.2496	0.00410122	0.0164312	0.1863	0.1769	0.1816	0.0066468	0.0366013	0.208	0.2069	0.20745	0.000777817	0.00374942	0.21103				0.21103	0.0400439	0.189755
497302	0.3799	0.3961	0.388	0.0114551	0.0295235	0.3778	0.3999	0.38885	0.0156271	0.0401879	0.4005	0.408	0.40425	0.0053033	0.0131189	0.3358	0.3164	0.3261	0.0137179	0.0420665	0.3629	0.3715	0.3672	0.00608112	0.0165608	0.37488				0.37488	0.0302835	0.0807819
519611	0.1732	0.1586	0.1659	0.0103238	0.0622288	0.2339	0.2253	0.2296	0.00608112	0.0264857	0.2266	0.2277	0.22715	0.000777817	0.00342425	0.1958	0.1951	0.19545	0.000494975	0.00253249	0.2859	0.326	0.30595	0.028355	0.0926785	0.22481				0.22481	0.052308	0.232677
519622	0.3102	0.3235	0.31685	0.00940452	0.0296813	0.2745	0.2669	0.2707	0.00537401	0.0198523	0.2867	0.2718	0.27925	0.0105359	0.0377292	0.3017	0.3093	0.3055	0.00537401	0.0175909	0.2894	0.2977	0.29355	0.00586899	0.0199931	0.29317				0.29317	0.0187855	0.0640772
575054	0.2675	0.2737	0.2706	0.00438406	0.0162013	0.3102	0.3111	0.31065	0.000636396	0.0020486	0.3121	0.3109	0.3115	0.000848528	0.00272401	0.2696	0.2728	0.2712	0.00226274	0.00834344	0.2965	0.2966	0.29655	7.07107e-05	0.000238444	0.2921				0.2921	0.0202443	0.069306
mn1	0.3471	0.3472	0.34715	7.07107e-05	0.000203689	0.2965	0.2957	0.2961	0.000565685	0.00191045	0.3935	0.3979	0.3957	0.00311127	0.0078627	0.1256	0.1316	0.1286	0.00424264	0.032991	0.4039	0.428	0.41595	0.0170413	0.0409695	0.3167				0.3167	0.114918	0.362861
mn2	0.2161	0.2152	0.21565	0.000636396	0.00295106	0.2501	0.2501	0.2501	0	0	0.2217	0.2213	0.2215	0.000282843	0.00127694	0.2242	0.2262	0.2252	0.00141421	0.00627981	0.2643	0.255	0.25965	0.00657609	0.0253268	0.23442				0.23442	0.0192786	0.0822397
mn3	0.285	0.2893	0.28715	0.00304056	0.0105887	0.2075	0.2016	0.20455	0.00417193	0.0203956	0.2793	0.262	0.27065	0.0122329	0.0451984	0.3358	0.325	0.3304	0.00763675	0.0231137	0.283	0.2737	0.27835	0.00657609	0.0236253	0.27422				0.27422	0.0452965	0.165183
mn8	0.3169	0.3029	0.3099	0.00989949	0.0319442	0.3715	0.3792	0.37535	0.00544472	0.0145057	0.3512	0.3593	0.35525	0.00572756	0.0161226	0.3163	0.3012	0.30875	0.0106773	0.0345824	0.302	0.2994	0.3007	0.00183848	0.00611399	0.32999				0.32999	0.0331973	0.100601
mn9	0.2918	0.2977	0.29475	0.00417193	0.0141541	0.3209	0.3359	0.3284	0.0106066	0.0322978	0.2999	0.2986	0.29925	0.000919239	0.00307181	0.3266	0.3252	0.3259	0.000989949	0.00303759	0.2432	0.2327	0.23795	0.00742462	0.0312024	0.29725				0.29725	0.0364619	0.122664
mn10	0.3229	0.323	0.32295	7.07107e-05	0.000218952	0.2869	0.2776	0.28225	0.00657609	0.0232988	0.3191	0.3181	0.3186	0.000707107	0.00221942	0.1532	0.1516	0.1524	0.00113137	0.00742369	0.2239	0.2736	0.24875	0.0351432	0.141279	0.26499				0.26499	0.0697702	0.263294
mn14	0.3287	0.3418	0.33525	0.0092631	0.0276304	0.348	0.3523	0.35015	0.00304056	0.00868359	0.3541	0.3514	0.35275	0.00190919	0.0054123	0.324	0.3255	0.32475	0.00106066	0.00326608	0.3681	0.3703	0.3692	0.00155563	0.00421353	0.34642				0.34642	0.0170827	0.049312
mn15	0.3483	0.3459	0.3471	0.00169706	0.00488924	0.4126	0.4091	0.41085	0.00247487	0.00602379	0.4144	0.4128	0.4136	0.00113137	0.00273542	0.3904	0.3962	0.3933	0.00410122	0.0104277	0.3524	0.3495	0.35095	0.00205061	0.00584303	0.38316				0.38316	0.0321479	0.0839021
mn16	0.2806	0.2886	0.2846	0.00565685	0.0198765	0.3839	0.3827	0.3833	0.000848528	0.00221374	0.3726	0.3719	0.37225	0.000494975	0.00132968	0.3256	0.3283	0.32695	0.00190919	0.00583939	0.3372	0.3269	0.33205	0.0072832	0.021934	0.33983				0.33983	0.0394255	0.116015
mn22	0.2657	0.2625	0.2641	0.00226274	0.00856775	0.3051	0.3025	0.3038	0.00183848	0.00605161	0.3118	0.3162	0.314	0.00311127	0.0099085	0.2037	0.204	0.20385	0.000212132	0.00104063	0.2843	0.279	0.28165	0.00374767	0.0133061	0.27348				0.27348	0.0434863	0.159011
mn24	0.2146	0.2111	0.21285	0.00247487	0.0116273	0.2308	0.2344	0.2326	0.00254558	0.010944	0.2372	0.231	0.2341	0.00438406	0.0187273	0.2535	0.2435	0.2485	0.00707107	0.028455	0.2261	0.2204	0.22325	0.00403051	0.0180538	0.23026				0.23026	0.0132775	0.057663
mn2i	0.2685	0.2634	0.26595	0.00360624	0.0135599	0.3142	0.3108	0.3125	0.00240416	0.00769332	0.3271	0.3269	0.327	0.000141421	0.000432481	0.2926	0.3123	0.30245	0.01393	0.0460572	0.3462	0.3352	0.3407	0.00777817	0.02283	0.30972				0.30972	0.0284374	0.0918166
MEAN			0.289655	0.00608369	0.0220513			0.322121	0.00481733	0.0150803			0.320815	0.00532773	0.0180268			0.266916	0.00671366	0.0266502			0.313778	0.0081073	0.0261437					0.302657	0.0238677	0.0788607
STD			0.0628819					0.0567667					0.0567476					0.0584457					0.0529568					0.191589				0.136452
CV			0.217093					0.176228					0.176886					0.218966					0.168772			MEAN	0.302657
																										STD	0.0463119
																										CV	0.153018

## Sheet: Eccentricity
	Top view front		Mean +/-SD		CV	Right side		Mean +/-SD		CV	Left side		Mean +/-SD		CV	Front		Mean +/-SD		CV	Back		Mean +/-SD		CV
Indiv	image 1	image 2	mean	sd		Image 1	Image2	mean	sd		Image 1	Image2	mean	sd		Image 1	Image2	mean	sd		Image 1	Image2	mean	sd		MEAN				MEAN Views	STD Views	CV Views
17923	0.8408	0.8456	0.8432	0.00339411	0.00402528	0.801	0.8337	0.81735	0.0231224	0.0282895	0.8126	0.8293	0.82095	0.0118087	0.0143842	0.6332	0.6368	0.635	0.00254558	0.00400879	0.9206	0.9217	0.92115	0.000777817	0.000844398	0.80753	0.80753			0.80753	0.105149	0.13021
20544	0.8366	0.8241	0.83035	0.00883883	0.0106447	0.8614	0.8615	0.86145	7.07107e-05	8.20833e-05	0.8064	0.7968	0.8016	0.00678823	0.00846834	0.866	0.887	0.8765	0.0148492	0.0169415	0.7313	0.7084	0.71985	0.0161927	0.0224946	0.81795				0.81795	0.0619779	0.0757722
22468	0.9248	0.9233	0.92405	0.00106066	0.00114784	0.8217	0.8213	0.8215	0.000282843	0.0003443	0.8586	0.8372	0.8479	0.0151321	0.0178465	0.7919	0.7938	0.79285	0.0013435	0.00169452	0.8599	0.858	0.85895	0.0013435	0.00156412	0.84905				0.84905	0.0490963	0.0578249
22609	0.7797	0.773	0.77635	0.00473762	0.00610242	0.8366	0.7941	0.81535	0.030052	0.0368578	0.7133	0.7131	0.7132	0.000141421	0.000198291	0.8657	0.8632	0.86445	0.00176777	0.00204496	0.7757	0.7826	0.77915	0.00487904	0.006262	0.7897				0.7897	0.055649	0.0704686
22612	0.8243	0.7567	0.7905	0.0478004	0.0604686	0.8725	0.8858	0.87915	0.00940452	0.0106973	0.8382	0.8501	0.84415	0.00841457	0.0099681	0.8498	0.8816	0.8657	0.022486	0.0259744	0.8461	0.7972	0.82165	0.0345775	0.042083	0.84023				0.84023	0.0353452	0.0420661
22613	0.7806	0.8415	0.81105	0.0430628	0.0530951	0.8279	0.8456	0.83675	0.0125158	0.0149576	0.8641	0.8624	0.86325	0.00120208	0.00139251	0.6563	0.6746	0.66545	0.0129401	0.0194456	0.7857	0.7109	0.7483	0.0528916	0.0706823	0.78496				0.78496	0.0792446	0.100954
22614	0.8333	0.8138	0.82355	0.0137886	0.0167429	0.809	0.7914	0.8002	0.0124451	0.0155525	0.8312	0.8289	0.83005	0.00162635	0.00195933	0.8674	0.8174	0.8424	0.0353553	0.0419698	0.6819	0.6743	0.6781	0.00537401	0.0079251	0.79486				0.79486	0.0670502	0.0843547
27761	0.8409	0.8485	0.8447	0.00537401	0.00636204	0.8555	0.8479	0.8517	0.00537401	0.00630975	0.8692	0.8708	0.87	0.00113137	0.00130043	0.8273	0.8551	0.8412	0.0196576	0.0233685	0.8541	0.6849	0.7695	0.119642	0.155481	0.83542				0.83542	0.0384896	0.0460721
36684	0.566	0.5586	0.5623	0.00523259	0.00930569	0.8203	0.823	0.82165	0.00190919	0.0023236	0.7882	0.7912	0.7897	0.00212132	0.00268624	0.8347	0.8747	0.8547	0.0282843	0.0330926	0.8939	0.9044	0.89915	0.00742462	0.00825738	0.7855				0.7855	0.131194	0.16702
42824	0.7666	0.7666	0.7666	0	0	0.8696	0.8705	0.87005	0.000636396	0.000731448	0.8164	0.8293	0.82285	0.00912168	0.0110855	0.8432	0.834	0.8386	0.00650538	0.00775743	0.8764	0.869	0.8727	0.00523259	0.00599586	0.83416				0.83416	0.0432591	0.0518595
42825	0.7945	0.7913	0.7929	0.00226274	0.00285375	0.6777	0.6669	0.6723	0.00763675	0.0113591	0.8704	0.8782	0.8743	0.00551543	0.0063084	0.893	0.8967	0.89485	0.0026163	0.00292372	0.7717	0.7631	0.7674	0.00608112	0.00792431	0.80035				0.80035	0.0893544	0.111644
45769	0.7579	0.758	0.75795	7.07107e-05	9.3292e-05	0.9254	0.9236	0.9245	0.00127279	0.00137674	0.8332	0.8469	0.84005	0.00968736	0.0115319	0.8714	0.8746	0.873	0.00226274	0.00259191	0.8845	0.8858	0.88515	0.000919239	0.00103851	0.85613				0.85613	0.062648	0.0731758
45779	0.7506	0.7658	0.7582	0.010748	0.0141757	0.8009	0.7802	0.79055	0.0146371	0.0185151	0.8159	0.8026	0.80925	0.00940452	0.0116213	0.816	0.8842	0.8501	0.0482247	0.0567282	0.7096	0.7537	0.73165	0.0311834	0.0426207	0.78795				0.78795	0.0457652	0.0580814
49607	0.719	0.7171	0.71805	0.0013435	0.00187104	0.798	0.7738	0.7859	0.017112	0.0217737	0.7746	0.7591	0.76685	0.0109602	0.0142924	0.8738	0.8888	0.8813	0.0106066	0.0120352	0.6964	0.6744	0.6854	0.0155563	0.0226967	0.7675				0.7675	0.0749585	0.0976659
52615	0.755	0.772	0.7635	0.0120208	0.0157444	0.7892	0.806	0.7976	0.0118794	0.0148939	0.8056	0.805	0.8053	0.000424264	0.00052684	0.8527	0.8713	0.862	0.0131522	0.0152578	0.7339	0.6715	0.7027	0.0441235	0.0627913	0.78622				0.78622	0.0585832	0.0745124
65908	0.76	0.7605	0.76025	0.000353553	0.000465049	0.7851	0.8018	0.79345	0.0118087	0.0148827	0.7851	0.7667	0.7759	0.0130108	0.0167686	0.8467	0.8717	0.8592	0.0176777	0.0205746	0.7703	0.8105	0.7904	0.0284257	0.0359637	0.79584				0.79584	0.0377957	0.0474915
139661	0.6551	0.6539	0.6545	0.000848528	0.00129645	0.8748	0.8775	0.87615	0.00190919	0.00217907	0.8407	0.8076	0.82415	0.0234052	0.0283992	0.8695	0.9122	0.89085	0.0301935	0.0338929	0.8991	0.9099	0.9045	0.00763675	0.00844307	0.83003				0.83003	0.102734	0.123772
141485	0.6894	0.826	0.7577	0.0965908	0.127479	0.8276	0.8655	0.84655	0.0267993	0.0316571	0.7684	0.7808	0.7746	0.00876812	0.0113196	0.7593	0.7614	0.76035	0.00148492	0.00195295	0.8692	0.8743	0.87175	0.00360624	0.00413679	0.80219				0.80219	0.053145	0.0662499
203066	0.8457	0.8406	0.84315	0.00360624	0.00427711	0.814	0.8849	0.84945	0.0501339	0.0590192	0.9146	0.8776	0.8961	0.026163	0.0291965	0.8335	0.8224	0.82795	0.00784889	0.0094799	0.7683	0.7217	0.745	0.0329512	0.0442298	0.83233				0.83233	0.0550511	0.0661409
203309	0.7925	0.8328	0.81265	0.0284964	0.035066	0.773	0.6973	0.73515	0.053528	0.0728123	0.8041	0.8184	0.81125	0.0101116	0.0124643	0.9251	0.9174	0.92125	0.00544472	0.00591015	0.8111	0.7452	0.77815	0.0465983	0.0598835	0.81169				0.81169	0.0688981	0.0848823
288185	0.7868	0.8402	0.8135	0.0377595	0.0464161	0.8395	0.7534	0.79645	0.0608819	0.0764416	0.8256	0.8256	0.8256	0	0	0.755	0.7755	0.76525	0.0144957	0.0189424	0.8043	0.7848	0.79455	0.0137886	0.017354	0.79907				0.79907	0.0228208	0.0285592
288186	0.8803	0.8781	0.8792	0.00155563	0.00176938	0.8359	0.8405	0.8382	0.00325269	0.00388057	0.7883	0.782	0.78515	0.00445477	0.00567379	0.8495	0.856	0.85275	0.00459619	0.00538985	0.8662	0.8605	0.86335	0.00403051	0.00466845	0.84373				0.84373	0.0360091	0.0426785
288187	0.7745	0.73	0.75225	0.0314663	0.0418295	0.8001	0.7604	0.78025	0.0280721	0.0359784	0.8609	0.8537	0.8573	0.00509117	0.00593861	0.7554	0.7735	0.76445	0.0127986	0.0167423	0.7491	0.8074	0.77825	0.0412243	0.0529705	0.7865				0.7865	0.0411674	0.0523426
288189	0.6705	0.7138	0.69215	0.0306177	0.0442357	0.7936	0.7761	0.78485	0.0123744	0.0157665	0.8687	0.8661	0.8674	0.00183848	0.00211953	0.8013	0.8407	0.821	0.02786	0.0339342	0.8483	0.8557	0.852	0.00523259	0.00614154	0.80348				0.80348	0.0698003	0.0868725
288199	0.7915	0.8019	0.7967	0.00735391	0.00923046	0.8776	0.866	0.8718	0.00820244	0.00940862	0.8843	0.8749	0.8796	0.0066468	0.00755662	0.7872	0.8105	0.79885	0.0164756	0.0206241	0.7934	0.8207	0.80705	0.019304	0.0239192	0.8308				0.8308	0.0412617	0.049665
288210	0.8069	0.7623	0.7846	0.031537	0.040195	0.9327	0.9422	0.93745	0.00671751	0.00716573	0.8612	0.8725	0.86685	0.00799031	0.00921763	0.874	0.8449	0.85945	0.0205768	0.0239418	0.7323	0.7718	0.75205	0.0279307	0.0371394	0.84008				0.84008	0.0731438	0.0870677
324296	0.7835	0.7679	0.7757	0.0110309	0.0142205	0.8154	0.8147	0.81505	0.000494975	0.000607294	0.8232	0.8117	0.81745	0.00813173	0.00994768	0.8843	0.8629	0.8736	0.0151321	0.0173215	0.8477	0.8992	0.87345	0.036416	0.0416921	0.83105				0.83105	0.0421688	0.0507416
326308	0.7673	0.7437	0.7555	0.0166877	0.0220883	0.9218	0.9159	0.91885	0.00417193	0.00454038	0.914	0.9144	0.9142	0.000282843	0.000309388	0.9449	0.9444	0.94465	0.000353553	0.000374269	0.8448	0.8804	0.8626	0.025173	0.0291827	0.87916				0.87916	0.075263	0.0856078
497193	0.7044	0.7532	0.7288	0.0345068	0.0473474	0.8843	0.8845	0.8844	0.000141421	0.000159907	0.821	0.8216	0.8213	0.000424264	0.000516576	0.8474	0.8403	0.84385	0.00502046	0.00594947	0.7267	0.7443	0.7355	0.0124451	0.0169206	0.80277				0.80277	0.0683579	0.0851525
497202	0.8189	0.764	0.79145	0.0388202	0.0490494	0.7725	0.7895	0.781	0.0120208	0.0153916	0.8161	0.828	0.82205	0.00841457	0.0102361	0.7665	0.7814	0.77395	0.0105359	0.0136131	0.6937	0.6625	0.6781	0.0220617	0.0325346	0.76931				0.76931	0.0541967	0.0704485
497203	0.7799	0.7799	0.7799	0	0	0.8918	0.9094	0.9006	0.0124451	0.0138187	0.8302	0.8408	0.8355	0.00749533	0.00897107	0.8379	0.7967	0.8173	0.0291328	0.0356452	0.7899	0.7589	0.7744	0.0219203	0.0283062	0.82154				0.82154	0.0510378	0.0621245
497237	0.7927	0.8239	0.8083	0.0220617	0.027294	0.7989	0.8508	0.82485	0.0366988	0.0444915	0.86	0.8564	0.8582	0.00254558	0.00296619	0.8748	0.8535	0.86415	0.0150614	0.0174291	0.8543	0.7967	0.8255	0.0407294	0.049339	0.8362				0.8362	0.0239109	0.0285947
497243	0.7637	0.7361	0.7499	0.0195161	0.026025	0.8745	0.8919	0.8832	0.0123037	0.0139308	0.8869	0.8857	0.8863	0.000848528	0.000957383	0.8529	0.8624	0.85765	0.00671751	0.00783247	0.6955	0.7986	0.74705	0.0729027	0.0975875	0.82482				0.82482	0.0705815	0.085572
497248	0.8015	0.6925	0.747	0.0770746	0.103179	0.879	0.8595	0.86925	0.0137886	0.0158626	0.7946	0.7946	0.7946	0	0	0.7939	0.794	0.79395	7.07107e-05	8.90619e-05	0.7273	0.7695	0.7484	0.0298399	0.0398716	0.79064				0.79064	0.0497364	0.0629065
497251	0.8261	0.8231	0.8246	0.00212132	0.00257254	0.8169	0.8159	0.8164	0.000707107	0.000866128	0.7831	0.7939	0.7885	0.00763675	0.00968517	0.8861	0.952	0.91905	0.0465983	0.0507027	0.8622	0.8622	0.8622	0	0	0.84215				0.84215	0.0504108	0.0598597
497252	0.7326	0.7501	0.74135	0.0123744	0.0166917	0.8114	0.7816	0.7965	0.0210718	0.0264555	0.8238	0.8249	0.82435	0.000777817	0.000943552	0.7414	0.7392	0.7403	0.00155563	0.00210136	0.9221	0.9265	0.9243	0.00311127	0.00336608	0.80536				0.80536	0.07569	0.0939829
497261	0.6724	0.7176	0.695	0.0319612	0.0459874	0.837	0.7571	0.79705	0.0564978	0.0708837	0.8289	0.8661	0.8475	0.0263044	0.0310376	0.7848	0.6851	0.73495	0.0704985	0.0959229	0.831	0.8416	0.8363	0.00749533	0.00896249	0.78216				0.78216	0.0656655	0.083954
497272	0.8049	0.7258	0.76535	0.0559321	0.0730805	0.7664	0.7456	0.756	0.0147078	0.0194548	0.7156	0.6919	0.70375	0.0167584	0.023813	0.9622	0.9626	0.9624	0.000282843	0.000293893	0.9427	0.8853	0.914	0.0405879	0.0444069	0.8203				0.8203	0.111479	0.1359
497276	0.8846	0.8819	0.88325	0.00190919	0.00216155	0.8961	0.9112	0.90365	0.0106773	0.0118158	0.8815	0.887	0.88425	0.00388909	0.00439818	0.8913	0.8899	0.8906	0.000989949	0.00111155	0.8562	0.8939	0.87505	0.0266579	0.0304645	0.88736				0.88736	0.0106532	0.0120055
497302	0.8631	0.8681	0.8656	0.00353553	0.00408449	0.6194	0.7988	0.7091	0.126855	0.178896	0.7503	0.8088	0.77955	0.0413657	0.0530636	0.6294	0.8148	0.7221	0.131098	0.18155	0.9194	0.9203	0.91985	0.000636396	0.000691848	0.79924				0.79924	0.0913974	0.114355
519611	0.891	0.8853	0.88815	0.00403051	0.00453809	0.843	0.8392	0.8411	0.00268701	0.00319463	0.8463	0.8184	0.83235	0.0197283	0.0237019	0.8735	0.9425	0.908	0.0487904	0.0537339	0.6962	0.8175	0.75685	0.0857721	0.113328	0.84529				0.84529	0.0586859	0.069427
519622	0.8574	0.6759	0.76665	0.12834	0.167403	0.8576	0.842	0.8498	0.0110309	0.0129805	0.7032	0.8411	0.77215	0.09751	0.126284	0.941	0.9393	0.94015	0.00120208	0.00127861	0.6555	0.5557	0.6056	0.0705693	0.116528	0.78687				0.78687	0.123429	0.156861
575054	0.7733	0.7749	0.7741	0.00113137	0.00146153	0.8658	0.8513	0.85855	0.010253	0.0119423	0.8959	0.9013	0.8986	0.00381838	0.00424925	0.8586	0.8179	0.83825	0.0287792	0.0343325	0.8244	0.8205	0.82245	0.00275772	0.00335305	0.83839				0.83839	0.0458775	0.0547209
mn1	0.8097	0.8102	0.80995	0.000353553	0.000436513	0.8602	0.86	0.8601	0.000141421	0.000164424	0.7901	0.8234	0.80675	0.0235467	0.0291871	0.9115	0.9231	0.9173	0.00820244	0.00894194	0.8063	0.8696	0.83795	0.0447599	0.0534159	0.84641				0.84641	0.04524	0.0534493
mn2	0.8571	0.868	0.86255	0.00770746	0.00893567	0.8802	0.8802	0.8802	0	0	0.8269	0.8451	0.836	0.0128693	0.015394	0.8792	0.8784	0.8788	0.000565685	0.000643702	0.7675	0.7742	0.77085	0.00473762	0.00614596	0.84568				0.84568	0.0454599	0.0537554
mn3	0.7861	0.7945	0.7903	0.0059397	0.00751575	0.835	0.85	0.8425	0.0106066	0.0125894	0.7814	0.782	0.7817	0.000424264	0.000542745	0.805	0.7779	0.79145	0.0191626	0.024212	0.883	0.9014	0.8922	0.0130108	0.0145828	0.81963				0.81963	0.0471235	0.0574936
mn8	0.6926	0.6947	0.69365	0.00148492	0.00214074	0.7596	0.7768	0.7682	0.0121622	0.0158321	0.8182	0.7975	0.80785	0.0146371	0.0181186	0.7633	0.8418	0.80255	0.0555079	0.0691644	0.7446	0.7381	0.74135	0.00459619	0.00619976	0.76272				0.76272	0.0471183	0.0617766
mn9	0.85	0.8358	0.8429	0.0100409	0.0119123	0.644	0.68	0.662	0.0254558	0.0384529	0.7508	0.7427	0.74675	0.00572756	0.00766999	0.8189	0.8923	0.8556	0.0519016	0.0606611	0.7905	0.7956	0.79305	0.00360624	0.00454731	0.78006				0.78006	0.0788537	0.101087
mn10	0.7886	0.7857	0.78715	0.00205061	0.00260511	0.7845	0.7854	0.78495	0.000636396	0.000810747	0.788	0.8305	0.80925	0.030052	0.0371357	0.7925	0.7958	0.79415	0.00233345	0.0029383	0.7558	0.8467	0.80125	0.064276	0.0802197	0.79535				0.79535	0.0100606	0.0126492
mn14	0.8259	0.8383	0.8321	0.00876812	0.0105373	0.7465	0.7423	0.7444	0.00296985	0.00398959	0.8367	0.7942	0.81545	0.030052	0.0368533	0.8763	0.8668	0.87155	0.00671751	0.00770755	0.6073	0.6221	0.6147	0.0104652	0.0170249	0.77564				0.77564	0.101056	0.130287
mn15	0.8404	0.8468	0.8436	0.00452548	0.00536449	0.8801	0.8916	0.88585	0.00813173	0.00917958	0.9473	0.9405	0.9439	0.00480833	0.00509411	0.806	0.8417	0.82385	0.0252437	0.0306412	0.8894	0.797	0.8432	0.0653367	0.0774866	0.86808				0.86808	0.0480599	0.0553635
mn16	0.7207	0.7131	0.7169	0.00537401	0.00749618	0.7138	0.6333	0.67355	0.0569221	0.0845106	0.7789	0.7911	0.785	0.0086267	0.0109894	0.8766	0.8717	0.87415	0.00346482	0.00396365	0.8717	0.8773	0.8745	0.0039598	0.00452807	0.78482				0.78482	0.0908522	0.115762
mn22	0.7471	0.8008	0.77395	0.0379716	0.0490621	0.8324	0.8208	0.8266	0.00820244	0.00992311	0.8287	0.8103	0.8195	0.0130108	0.0158765	0.9001	0.9083	0.9042	0.00579828	0.0064126	0.8866	0.8889	0.88775	0.00162635	0.00183199	0.8424				0.8424	0.0532337	0.0631929
mn24	0.7468	0.7621	0.75445	0.0108187	0.0143399	0.8336	0.8278	0.8307	0.00410122	0.00493706	0.7492	0.7911	0.77015	0.0296278	0.0384701	0.8128	0.8461	0.82945	0.0235467	0.0283883	0.6543	0.7889	0.7216	0.0951766	0.131897	0.78127				0.78127	0.0478751	0.0612786
mn2i	0.7795	0.7636	0.77155	0.011243	0.014572	0.8297	0.8418	0.83575	0.00855599	0.0102375	0.7294	0.7381	0.73375	0.00615183	0.00838409	0.9189	0.923	0.92095	0.00289914	0.00314799	0.6828	0.6661	0.67445	0.0118087	0.0175086	0.78729				0.78729	0.094948	0.120601
MEAN			0.784174	0.0181315	0.0235817			0.822835	0.0162995	0.0208941			0.821817	0.0113896	0.0141276			0.840879	0.0181675	0.0222423			0.79986	0.025443	0.0331897					0.813913	0.022086	0.0271355
STD			0.0616915					0.0607505					0.0480534					0.065817					0.0791634					0.0776434				0.0750616
CV			0.0786707					0.0738308					0.0584722					0.0782716					0.0989716			MEAN	0.813913
																										STD	0.0294345
																										CV	0.0361642

## Sheet: Average Object Area
	Top view front		Mean +/-SD		CV	Right side		Mean +/-SD		CV	Left side		Mean +/-SD		CV	Front		Mean +/-SD		CV	Back		Mean +/-SD		CV
Indiv	image 1	image 2	mean	sd		Image 1	Image2	mean	sd		Image 1	Image2	mean	sd		Image 1	Image2	mean	sd		Image 1	Image2	mean	sd		MEAN				MEAN Views	STD Views	CV Views
17923	216.45	211.429	213.939	3.55003	0.0165936	27.8348	24.636	26.2354	2.26189	0.0862153	52.1971	52.8967	52.5469	0.494692	0.00941429	17.0091	23.7339	20.3715	4.75515	0.233422	125.55	131.178	128.364	3.97953	0.0310018	88.2915	88.2915			88.2915	82.3634	0.932859
20544	40.9766	38.6538	39.8152	1.64247	0.0412523	33.642	43.1554	38.3987	6.72699	0.175188	32.6952	29.2651	30.9802	2.42545	0.0782904	20.6519	21.4142	21.0331	0.539027	0.0256276	42.3531	26.1907	34.2719	11.4285	0.333467	32.8998				32.8998	7.4908	0.227685
22468	105.695	108.762	107.228	2.16848	0.020223	139.899	150.57	145.234	7.5449	0.0519498	291.386	145.132	218.259	103.417	0.473828	52.5982	54.9254	53.7618	1.64558	0.0306087	120.383	144.368	132.375	16.9602	0.128122	131.372				131.372	59.8931	0.455905
22609	34.5598	37.7657	36.1628	2.26691	0.0626864	40.8834	38.0416	39.4625	2.00946	0.0509206	23.085	22.5901	22.8376	0.349947	0.0153233	11.6177	12.8449	12.2313	0.867761	0.070946	23.3837	25.1602	24.272	1.25618	0.0517542	26.9932				26.9932	10.979	0.406731
22612	25.5456	22.7147	24.1302	2.00175	0.0829563	17.7556	18.8881	18.3219	0.800798	0.0437073	39.1498	27.7966	33.4732	8.02792	0.239831	7.4742	6.2691	6.87165	0.852134	0.124007	44.8269	42.571	43.6989	1.59516	0.0365034	25.2992				25.2992	14.0978	0.557243
22613	34.9319	26.8232	30.8775	5.73372	0.185692	18.6332	17.4595	18.0463	0.829931	0.0459889	15.3619	15.3242	15.343	0.0266579	0.00173746	18.7444	24.7964	21.7704	4.27941	0.19657	84.5077	103.767	94.1373	13.6183	0.144664	36.0349				36.0349	33.0065	0.915957
22614	39.809	44.9753	42.3922	3.65313	0.0861746	21.7859	28.7654	25.2756	4.93525	0.195257	24.8166	24.5417	24.6791	0.194384	0.00787643	13.9098	14.4159	14.1629	0.357867	0.025268	123.65	116.419	120.035	5.11323	0.042598	45.3089				45.3089	42.9809	0.94862
27761	25.6104	18.8284	22.2194	4.7956	0.215829	17.5298	16.722	17.1259	0.571201	0.033353	16.8436	18.4997	17.6716	1.17104	0.0662666	10.269	11.4419	10.8555	0.829366	0.0764008	52.846	114.7	83.7729	43.7372	0.522093	30.3291				30.3291	30.1487	0.994052
36684	68.6904	60.7348	64.7126	5.62546	0.0869299	29.5666	31.8118	30.6892	1.5876	0.0517314	39.6091	33.981	36.7951	3.97967	0.108158	20.5147	19.1535	19.8341	0.962514	0.0485282	31.5945	36.9293	34.2619	3.77227	0.110101	37.2586				37.2586	16.656	0.447038
42824	55.5264	46.1806	50.8535	6.60848	0.129951	41.2923	41.279	41.2857	0.00940452	0.000227792	47.9889	39.2679	43.6284	6.16668	0.141346	23.9717	17.3333	20.6525	4.69406	0.227288	49.9058	62.5035	56.2047	8.90792	0.158491	42.5249				42.5249	13.5799	0.31934
42825	67.6139	68.1042	67.859	0.346694	0.00510904	82.0646	78.2081	80.1363	2.72696	0.034029	69.8574	88.3231	79.0902	13.0572	0.165093	32.1447	33.1156	32.6302	0.68653	0.0210397	125.279	130.39	127.835	3.61416	0.0282721	77.5101				77.5101	34.093	0.439852
45769	80.3095	80.321	80.3152	0.00813173	0.000101248	48.8123	48.4532	48.6328	0.253922	0.00522122	31.26	30.9599	31.11	0.212203	0.00682106	21.8386	21.4248	21.6317	0.292601	0.0135265	43.0942	43.6714	43.3828	0.408142	0.00940792	45.0145				45.0145	22.3718	0.496991
45779	37.398	37.8384	37.6182	0.31141	0.00827817	20.426	18.5538	19.4899	1.32385	0.0679247	16.1813	17.745	16.9631	1.1057	0.0651826	21.3239	13.4612	17.3925	5.55977	0.319664	81.7078	75.1029	78.4053	4.67037	0.059567	33.9738				33.9738	26.2751	0.773393
49607	47.1074	43.1929	45.1501	2.76797	0.0613059	28.17	32.0821	30.126	2.76627	0.0918233	20.0066	21.2709	20.6388	0.893995	0.0433163	14.5371	15.0575	14.7973	0.367978	0.0248679	64.6577	65.1259	64.8918	0.331067	0.00510184	35.1208				35.1208	20.2152	0.575591
52615	28.9797	30.9873	29.9835	1.41959	0.0473456	27.8828	27.4324	27.6576	0.318481	0.0115151	21.9737	22.5115	22.2426	0.380282	0.017097	20.0482	17.631	18.8396	1.70922	0.0907248	96.2174	62.0593	79.1384	24.1534	0.305205	35.5723				35.5723	24.7464	0.695665
65908	20.9705	21.0064	20.9885	0.0253851	0.00120948	18.9526	22.5791	20.7659	2.56432	0.123487	23.1788	20.3064	21.7426	2.03109	0.0934154	12.1022	13.0101	12.5561	0.641982	0.0511289	16.1694	16.4432	16.3063	0.193606	0.0118731	18.4719				18.4719	3.93633	0.213098
139661	51.5813	39.1405	45.3609	8.79697	0.193933	80.7682	85.3814	83.0748	3.26203	0.0392661	64.2863	102.124	83.2052	26.7553	0.321558	17.2342	29.6443	23.4393	8.77527	0.374383	13.9478	19.9629	16.9554	4.25332	0.250854	50.4071				50.4071	31.6806	0.628495
141485	15.012	18.9536	16.9828	2.78713	0.164115	20.9698	27.0779	24.0238	4.31908	0.179783	16.9781	16.004	16.4911	0.688793	0.0417677	21.4612	22.3035	21.8824	0.595596	0.0272181	12.9778	11.4294	12.2036	1.09488	0.0897181	18.3167				18.3167	4.68422	0.255735
203066	24.1405	27.3812	25.7608	2.29152	0.0889536	20.3757	22.7982	21.587	1.71297	0.0793519	30.401	55.1341	42.7675	17.4889	0.40893	15.664	14.291	14.9775	0.970858	0.0648211	37.4842	31.1312	34.3077	4.49225	0.13094	27.8801				27.8801	10.8803	0.390253
203309	51.9534	39.0103	45.4819	9.15215	0.201227	22.9621	26.1488	24.5555	2.25334	0.0917653	25.3162	30.0542	27.6852	3.35027	0.121013	35.0232	29.6908	32.357	3.77058	0.11653	99.7197	41.2628	70.4913	41.3353	0.586389	40.1142				40.1142	18.7637	0.467758
288185	66.8436	44.7932	55.8184	15.592	0.279334	59.6471	37.0731	48.3601	15.9622	0.33007	26.3542	20.1891	23.2717	4.35938	0.187326	20.8223	28.6715	24.7469	5.55022	0.22428	20.5967	22.7766	21.6867	1.54142	0.071077	34.7767				34.7767	16.0591	0.461776
288186	75.5807	59.0444	67.3126	11.6929	0.173711	29.6623	35.7095	32.6859	4.27602	0.130821	26.9177	30.2649	28.5913	2.36683	0.0827814	27.2214	34.3122	30.7668	5.01395	0.162966	92.8953	94.5939	93.7446	1.20109	0.0128124	50.6202				50.6202	28.8938	0.570796
288187	17.3585	17.05	17.2043	0.218142	0.0126796	28.8481	21.1717	25.0099	5.42803	0.217035	27.0991	23.3261	25.2126	2.66791	0.105817	17.509	21.8208	19.6649	3.0489	0.155043	32.9429	31.5423	32.2426	0.990374	0.0307163	23.8668				23.8668	5.8163	0.243698
288189	43.8178	36.482	40.1499	5.18719	0.129196	24.8927	29.3318	27.1123	3.13892	0.115775	34.6633	29.8211	32.2422	3.42395	0.106195	24.9092	36.9951	30.9521	8.54602	0.276104	80.1556	79.2748	79.7152	0.62282	0.00781306	42.0343				42.0343	21.5915	0.513663
288199	25.244	31.4458	28.3449	4.38533	0.154713	14.4268	15.8316	15.1292	0.993344	0.0656574	26.6378	30.6404	28.6391	2.83027	0.0988252	8.633	12.8014	10.7172	2.9475	0.275026	54.1121	69.9361	62.0241	11.1893	0.180402	28.9709				28.9709	20.111	0.694179
288210	20.1236	29.0264	24.575	6.29523	0.256164	41.1217	48.5149	44.8183	5.22778	0.116644	63.1155	64.1953	63.6554	0.763534	0.0119948	19.8203	27.7356	23.778	5.59696	0.235385	87.9045	89.6047	88.7546	1.20222	0.0135455	49.1163				49.1163	27.5924	0.561777
324296	68.8396	74.0269	71.4333	3.66798	0.0513483	35.1091	39.9492	37.5292	3.42247	0.0911949	38.4359	43.4553	40.9456	3.54925	0.0866821	18.0625	14.0535	16.058	2.83479	0.176535	30.0169	57.0884	43.5526	19.1424	0.439524	41.9037				41.9037	19.7659	0.471699
326308	100.073	93.3389	96.7058	4.76152	0.0492371	47.2252	36.0983	41.6617	7.86791	0.188852	71.0005	70.9084	70.9545	0.0651245	0.000917836	32.1911	31.5248	31.8579	0.471145	0.0147889	59.9375	124.251	92.0942	45.4764	0.493804	66.6548				66.6548	29.1727	0.437668
497193	24.617	21.3142	22.9656	2.33543	0.101693	32.2558	33.9209	33.0884	1.1774	0.0355836	20.0876	20.7959	20.4417	0.500844	0.024501	18.0863	12.1788	15.1326	4.17723	0.276043	20.4215	24.809	22.6153	3.10243	0.137183	22.8487				22.8487	6.52401	0.285531
497202	38.4651	56.5172	47.4912	12.7648	0.268782	18.9668	19.248	19.1074	0.198838	0.0104064	23.7541	23.7915	23.7728	0.0264458	0.00111244	42.0224	66.9308	54.4766	17.6129	0.323311	66.2424	77.2506	71.7465	7.78397	0.108493	43.3189				43.3189	21.8991	0.505532
497203	27.5651	23.5482	25.5567	2.84038	0.11114	51.1175	25.9309	38.5242	17.8096	0.462297	15.8422	16.5548	16.1985	0.503884	0.0311068	11.5398	13.6963	12.6181	1.52488	0.120849	21.08	27.0003	24.0401	4.18628	0.174137	23.3875				23.3875	10.0239	0.4286
497237	17.2401	22.3075	19.7738	3.58319	0.181209	32.3519	27.2001	29.776	3.64287	0.122343	94.1778	57.1784	75.6781	26.1625	0.345708	15.3287	16.9106	16.1197	1.11857	0.0693918	48.0891	32.6093	40.3492	10.9459	0.271279	36.3394				36.3394	23.9267	0.658424
497243	31.4731	27.2624	29.3678	2.97741	0.101384	33.4649	39.968	36.7165	4.59839	0.12524	48.0009	48.894	48.4475	0.631517	0.0130351	17.0607	21.4447	19.2527	3.09996	0.161014	30.6445	45.7407	38.1926	10.6746	0.279495	34.3954				34.3954	10.861	0.315769
497248	64.2269	56.6713	60.4491	5.34262	0.0883821	24.0134	24.9204	24.4669	0.641346	0.0262128	35.0215	35.5315	35.2765	0.360624	0.0102228	21.0063	21.1583	21.0823	0.10748	0.00509813	73.6571	50.5812	62.1192	16.3171	0.262675	40.6788				40.6788	19.5358	0.480245
497251	122.75	63.6569	93.2035	41.7852	0.448322	28.2048	30.482	29.3434	1.61022	0.0548752	65.7377	82.7873	74.2625	12.0559	0.162342	44.3536	34.5905	39.472	6.90355	0.174897	172.603	185.249	178.926	8.94214	0.0499768	83.0414				83.0414	59.4893	0.716381
497252	17.9012	21.0624	19.4818	2.23531	0.114738	19.3715	17.4614	18.4165	1.35064	0.073339	19.0463	23.3058	21.1761	3.01192	0.142232	13.1955	8.1228	10.6592	3.58694	0.336513	46.4004	32.9665	39.6835	9.4992	0.239374	21.8834				21.8834	10.7368	0.490636
497261	39.3076	29.9358	34.6217	6.62686	0.191408	41.9375	37.0929	39.5152	3.42565	0.0866919	67.9898	46.3968	57.1933	15.2686	0.266964	12.5486	18.6636	15.6061	4.32396	0.277068	185.503	212.364	198.934	18.9932	0.0954749	69.174				69.174	74.034	1.07026
497272	90.0537	103.195	96.6245	9.29259	0.0961721	38.0948	33.8718	35.9833	2.98611	0.0829861	62.5135	61.3516	61.9325	0.821587	0.0132658	36.4034	37.944	37.1737	1.08937	0.0293048	44.862	93.3739	69.118	34.3031	0.496298	60.1664				60.1664	25.1293	0.417664
497276	27.4076	31.9862	29.6969	3.23756	0.10902	23.3635	23.3616	23.3625	0.0013435	5.75067e-05	26.7253	25.6518	26.1885	0.759079	0.0289852	8.2527	7.8835	8.0681	0.261064	0.0323575	14.2658	17.4611	15.8635	2.25942	0.142429	20.6359				20.6359	8.67603	0.420434
497302	98.9003	96.845	97.8726	1.45332	0.0148491	74.298	70.7447	72.5213	2.51256	0.0346458	147.439	71.4652	109.452	53.7217	0.490824	23.6915	23.7849	23.7382	0.0660438	0.00278217	89.0163	88.8005	88.9084	0.152594	0.0017163	78.4986				78.4986	33.4525	0.426154
519611	10.3242	11.5791	10.9517	0.887348	0.0810242	13.9621	15.432	14.6971	1.03938	0.0707201	13.1184	17.7678	15.4431	3.28762	0.212886	9.281	5.8792	7.5801	2.40544	0.317336	37.1694	32.1544	34.6619	3.54614	0.102307	16.6668				16.6668	10.5408	0.632443
519622	156.096	149.105	152.6	4.94345	0.0323948	39.3234	38.9926	39.158	0.233911	0.00597352	24.4566	23.3326	23.8946	0.794788	0.0332622	16.9474	16.5175	16.7325	0.303985	0.0181674	56.8144	31.2014	44.0079	18.1111	0.411543	55.2786				55.2786	55.5183	1.00434
575054	36.8683	35.0298	35.949	1.30002	0.0361627	19.4928	22.614	21.0534	2.20702	0.10483	29.653	33.1678	31.4104	2.48534	0.0791247	11.3088	12.7638	12.0363	1.02884	0.0854781	34.6156	35.1754	34.8955	0.395838	0.0113435	27.0689				27.0689	10.2607	0.379058
mn1	53.6216	53.8063	53.7139	0.130603	0.00243145	43.485	36.9039	40.1945	4.65354	0.115776	43.5414	74.1058	58.8236	21.6123	0.367409	10.0372	9.5525	9.79485	0.342735	0.0349913	74.5856	46.7752	60.6804	19.6649	0.324074	44.6414				44.6414	21.0639	0.471846
mn2	25.6895	29.0094	27.3494	2.34752	0.0858344	33.2616	33.2616	33.2616	0	0	27.0583	26.5428	26.8006	0.364514	0.013601	27.2459	28.7573	28.0016	1.06872	0.0381664	37.7905	46.2517	42.0211	5.98297	0.14238	31.4869				31.4869	6.42936	0.204192
mn3	22.0862	20.7889	21.4376	0.91733	0.0427908	21.2593	24.4146	22.837	2.23113	0.0976984	17.0923	23.0103	20.0513	4.18466	0.208698	12.5729	16.2247	14.3988	2.58221	0.179335	41.8005	44.5547	43.1776	1.94751	0.0451047	24.3804				24.3804	10.9858	0.450599
mn8	31.4243	30.4967	30.9605	0.655912	0.0211855	33.8933	33.042	33.4677	0.60196	0.0179863	26.6517	26.4008	26.5263	0.177413	0.00668821	15.943	19.8137	17.8784	2.737	0.15309	30.4779	31.2457	30.8618	0.542917	0.0175919	27.9389				27.9389	6.15327	0.22024
mn9	81.8182	83.2732	82.5457	1.02884	0.0124639	71.1881	48.0414	59.6148	16.3672	0.274549	57.107	91.2696	74.1883	24.1566	0.325612	24.5723	31.0327	27.8025	4.56819	0.164309	80.5837	84.3079	82.4458	2.63341	0.0319411	65.3194				65.3194	22.9607	0.351514
mn10	46.5548	53.2637	49.9093	4.74391	0.0950507	38.6006	41.0454	39.823	1.72873	0.0434105	54.2506	59.4073	56.8289	3.64634	0.0641634	8.3255	8.9503	8.6379	0.4418	0.0511467	17.7166	27.0176	22.3671	6.5768	0.294039	35.5132				35.5132	19.8449	0.558803
mn14	29.5945	26.1187	27.8566	2.45776	0.0882291	23.8098	27.5877	25.6988	2.67138	0.10395	21.3122	21.1577	21.2349	0.109248	0.00514473	24.7782	25.3183	25.0482	0.381908	0.0152469	56.3976	55.7148	56.0562	0.482813	0.00861301	31.1789				31.1789	14.1104	0.452563
mn15	31.0887	31.1175	31.1031	0.0203647	0.000654747	66.614	93.2278	79.9209	18.8188	0.235468	58.7041	58.9427	58.8234	0.168716	0.00286817	18.7598	21.946	20.3529	2.25298	0.110696	130.199	130.831	130.515	0.446821	0.00342352	64.143				64.143	43.8511	0.683646
mn16	36.5977	37.1968	36.8972	0.423628	0.0114813	53.1897	55.1327	54.1612	1.37391	0.025367	31.5467	33.3925	32.4696	1.30518	0.0401969	18.1521	19.2335	18.6928	0.764665	0.0409069	17.664	18.8835	18.2737	0.862317	0.0471888	32.0989				32.0989	14.8388	0.462285
mn22	27.0901	28.0386	27.5643	0.670691	0.0243318	52.4253	56.7726	54.599	3.07401	0.0563015	43.788	49.9143	46.8511	4.33195	0.0924619	25.3423	23.4891	24.4157	1.31041	0.0536708	114.675	120.092	117.384	3.83004	0.0326284	54.1628				54.1628	37.5596	0.693458
mn24	26.0619	26.9289	26.4954	0.613062	0.0231384	29.5351	31.2839	30.4095	1.23659	0.0406645	21.7655	21.7842	21.7749	0.0132229	0.000607255	35.2159	28.5127	31.8643	4.73988	0.148752	48.3467	58.462	53.4044	7.1526	0.133933	32.7897				32.7897	12.1699	0.371152
mn2i	25.4555	25.8203	25.6379	0.257953	0.0100614	50.1996	51.0686	50.6341	0.614476	0.0121356	50.2215	50.8108	50.5161	0.416698	0.00824881	25.1515	28.863	27.0072	2.62443	0.0971749	80.2465	80.975	80.6107	0.515127	0.00639031	46.8812				46.8812	22.4234	0.478302
MEAN			48.4991	4.24775	0.0945561			37.3233	3.48913	0.0915321			41.9513	7.14769	0.110874			21.1679	2.7016	0.127269			63.8361	8.65695	0.148306					42.5555	15.5994	0.366565
STD			36.1121					22.0225					32.2695					10.0562					41.1531					0.644718				0.519538
CV			0.744592					0.590045					0.769214					0.475071					0.644668			MEAN	42.5555
																										STD	21.0676
																										CV	0.495062

## Sheet: Peak Length
	Top view front		Mean +/-SD		CV	Right side		Mean +/-SD		CV	Left side		Mean +/-SD		CV	Front		Mean +/-SD		CV	Back		Mean +/-SD		CV
Indiv	image 1	image 2	mean	sd		Image 1	Image2	mean	sd		Image 1	Image2	mean	sd		Image 1	Image2	mean	sd		Image 1	Image2	mean	sd		MEAN				MEAN Views	STD Views	CV Views
17923	7.3926	8.2178	7.8052	0.583505	0.0747584	5.5616	5.3396	5.4506	0.156978	0.0288001	4.6744	4.9112	4.7928	0.167443	0.0349363	4.0504	4.4264	4.2384	0.265872	0.0627294	5.5114	5.8521	5.68175	0.240911	0.0424009	5.59375	5.59375			5.59375	1.35989	0.243109
20544	6.5051	6.2449	6.375	0.183989	0.028861	4.7906	4.9399	4.86525	0.105571	0.021699	4.5897	4.4321	4.5109	0.11144	0.0247046	4.9594	5.0922	5.0258	0.0939038	0.0186843	5.3593	5.2061	5.2827	0.108329	0.0205063	5.21193				5.21193	0.707816	0.135807
22468	8.4945	8.7234	8.60895	0.161857	0.018801	6.7579	6.9246	6.84125	0.117875	0.01723	7.5381	7.2116	7.37485	0.23087	0.0313051	5.0711	5.6159	5.3435	0.385232	0.0720935	6.2615	7.7678	7.01465	1.06511	0.151841	7.03664				7.03664	1.17174	0.16652
22609	6.4444	6.3101	6.37725	0.0949644	0.0148911	5.1606	5.1869	5.17375	0.0185969	0.00359447	4.7875	4.9112	4.84935	0.0874691	0.0180373	5.1331	5.5076	5.32035	0.264811	0.0497733	4.6352	4.878	4.7566	0.171686	0.0360942	5.29546				5.29546	0.647126	0.122204
22612	6.0079	5.8385	5.9232	0.119784	0.0202228	4.7658	4.8177	4.79175	0.0366988	0.00765876	4.0469	4.1997	4.1233	0.108046	0.0262037	4.1868	5.0234	4.6051	0.591566	0.128459	6.6297	6.0579	6.3438	0.404324	0.0637352	5.15743				5.15743	0.935694	0.181426
22613	6.2371	6.6784	6.45775	0.312046	0.0483212	5.3998	5.2706	5.3352	0.0913582	0.0171237	5.3479	5.5112	5.42955	0.115471	0.0212671	7.071	8.2706	7.6708	0.848245	0.110581	6.0251	6.4507	6.2379	0.300945	0.0482445	6.22624				6.22624	0.94461	0.151714
22614	7.3584	7.3959	7.37715	0.0265165	0.00359441	5.4405	5.5261	5.4833	0.0605283	0.0110387	5.1376	5.2734	5.2055	0.0960251	0.0184469	4.9157	5.4439	5.1798	0.373494	0.0721058	5.0768	5.1216	5.0992	0.0316784	0.00621242	5.66899				5.66899	0.9658	0.170366
27761	5.4094	6.8688	6.1391	1.03195	0.168095	4.8448	4.7524	4.7986	0.0653367	0.0136158	4.348	4.4283	4.38815	0.0567807	0.0129395	4.4041	4.6631	4.5336	0.183141	0.0403963	6.5879	6.1696	6.37875	0.295783	0.04637	5.24764				5.24764	0.938659	0.178873
36684	7.8163	9.0465	8.4314	0.869883	0.103172	5.0977	5.3299	5.2138	0.16419	0.0314915	6.4412	5.9712	6.2062	0.33234	0.0535497	4.7546	4.9054	4.83	0.106632	0.022077	5.9138	6.0549	5.98435	0.0997728	0.0166723	6.13315				6.13315	1.40115	0.228454
42824	7.2879	7.5871	7.4375	0.211566	0.0284459	5.8602	6.0445	5.95235	0.13032	0.0218938	6.0427	6.0717	6.0572	0.0205061	0.00338541	6.8084	6.1014	6.4549	0.499924	0.0774488	5.8241	5.6384	5.73125	0.13131	0.0229112	6.32664				6.32664	0.6741	0.106549
42825	10.202	9.7516	9.9768	0.318481	0.0319221	6.7042	6.7683	6.73625	0.0453255	0.0067286	6.1182	6.056	6.0871	0.043982	0.00722545	6.332	6.5804	6.4562	0.175645	0.0272057	5.7795	5.8321	5.8058	0.0371938	0.00640632	7.01243				7.01243	1.6945	0.241643
45769	9.0245	9.1125	9.0685	0.0622254	0.00686171	5.4733	5.4817	5.4775	0.0059397	0.00108438	5.3497	5.3843	5.367	0.0244659	0.00455858	5.1298	5.2205	5.17515	0.0641346	0.0123928	7.7967	7.6356	7.71615	0.113915	0.0147632	6.56086				6.56086	1.74228	0.265556
45779	7.9554	8.8077	8.38155	0.602667	0.071904	4.4147	4.4444	4.42955	0.0210011	0.00474113	4.7673	4.5832	4.67525	0.130178	0.0278441	5.8078	5.5375	5.67265	0.191131	0.0336934	7.5122	7.2866	7.3994	0.159523	0.0215589	6.11168				6.11168	1.72454	0.282171
49607	10.1045	10.0857	10.0951	0.0132936	0.00131684	5.6103	5.8084	5.70935	0.140078	0.0245348	5.616	6.0172	5.8166	0.283691	0.0487727	5.9404	5.9021	5.92125	0.0270822	0.00457373	5.4724	5.188	5.3302	0.201101	0.0377286	6.5745				6.5745	1.98069	0.301269
52615	7.7685	7.5748	7.67165	0.136967	0.0178536	4.9309	5.1001	5.0155	0.119642	0.0238545	5.4893	5.5262	5.50775	0.0260922	0.00473737	6.05	6.0098	6.0299	0.0284257	0.00471412	7.6193	6.5555	7.0874	0.75222	0.106135	6.26244				6.26244	1.10056	0.17574
65908	6.5515	6.5716	6.56155	0.0142128	0.00216608	5.2674	5.5485	5.40795	0.198768	0.0367547	5.2323	5.3097	5.271	0.0547301	0.0103832	5.3066	5.7668	5.5367	0.325411	0.0587734	4.9854	4.9184	4.9519	0.0473762	0.00956727	5.54582				5.54582	0.608084	0.109647
139661	6.6186	7.2261	6.92235	0.429567	0.0620551	4.7467	4.8096	4.77815	0.044477	0.00930842	4.5763	4.8841	4.7302	0.217647	0.0460123	5.4692	5.5596	5.5144	0.0639225	0.0115919	5.1073	4.8292	4.96825	0.196646	0.0395806	5.38267				5.38267	0.915269	0.17004
141485	8.1938	7.7198	7.9568	0.335169	0.0421235	5.3193	5.4105	5.3649	0.0644881	0.0120204	4.8396	4.7157	4.77765	0.0876105	0.0183376	5.9011	6.0741	5.9876	0.122329	0.0204305	4.4073	4.1468	4.27705	0.184201	0.0430674	5.6728				5.6728	1.42828	0.251777
203066	6.6923	6.4211	6.5567	0.191767	0.0292475	4.4566	4.6243	4.54045	0.118582	0.0261168	4.7314	4.8256	4.7785	0.0666095	0.0139394	5.5428	5.8869	5.71485	0.243315	0.042576	6.5615	5.8249	6.1932	0.520855	0.0841011	5.55674				5.55674	0.875857	0.157621
203309	9.2612	9.4219	9.34155	0.113632	0.0121642	6.2243	6.6315	6.4279	0.287934	0.0447944	6.8529	7.4392	7.14605	0.414577	0.0580148	8.3064	8.2175	8.26195	0.0628618	0.00760859	8.6245	8.8858	8.75515	0.184767	0.0211038	7.98652				7.98652	1.18727	0.148659
288185	4.9629	5.2602	5.11155	0.210223	0.041127	4.9481	5.1377	5.0429	0.134067	0.0265854	4.2387	4.49	4.36435	0.177696	0.0407153	5.6388	6.4401	6.03945	0.566605	0.0938173	4.7979	4.6884	4.74315	0.0774282	0.0163242	5.06028				5.06028	0.621811	0.122881
288186	8.1952	8.3544	8.2748	0.112571	0.0136041	5.4862	5.102	5.2941	0.27167	0.0513157	4.5574	4.7364	4.6469	0.126572	0.027238	6.0829	6.6811	6.382	0.422991	0.0662788	6.8643	6.9319	6.8981	0.0478004	0.0069295	6.29918				6.29918	1.415	0.224632
288187	7.0181	6.3244	6.67125	0.49052	0.0735274	5.9024	5.3967	5.64955	0.357584	0.0632942	6.5983	6.1459	6.3721	0.319895	0.0502025	6.5472	6.6293	6.58825	0.0580535	0.00881167	7.5796	7.1531	7.36635	0.301581	0.0409404	6.5295				6.5295	0.617039	0.0945002
288189	7.3316	8.0141	7.67285	0.4826	0.0628971	5.096	5.5118	5.3039	0.294015	0.0554337	5.6104	5.5624	5.5864	0.0339411	0.00607567	5.5117	5.8263	5.669	0.222456	0.0392407	5.8367	5.3976	5.61715	0.310491	0.0552755	5.96986				5.96986	0.962502	0.161227
288199	8.5938	8.633	8.6134	0.0277186	0.00321808	5.1383	5.1044	5.12135	0.0239709	0.00468059	5.6667	5.4915	5.5791	0.123885	0.0222052	5.3977	5.9673	5.6825	0.402768	0.0708787	5.7133	6.0797	5.8965	0.259084	0.0439386	6.17857				6.17857	1.39024	0.225011
288210	6.7363	6.1323	6.4343	0.427092	0.0663775	5.0522	4.8763	4.96425	0.12438	0.0250552	5.2943	5.3739	5.3341	0.0562857	0.0105521	5.5001	5.8198	5.65995	0.226062	0.0399406	6.2145	5.7659	5.9902	0.317208	0.0529545	5.67656				5.67656	0.569535	0.100331
324296	8.7857	9.2912	9.03845	0.357442	0.0395469	5.4934	5.5688	5.5311	0.0533159	0.00963929	5.8979	5.8273	5.8626	0.0499217	0.00851529	6.4352	5.8929	6.16405	0.383464	0.0622097	7.552	8.1468	7.8494	0.420587	0.0535821	6.88912				6.88912	1.49712	0.217316
326308	8.8923	9.6779	9.2851	0.555503	0.0598274	6.1744	5.6131	5.89375	0.396899	0.0673424	6.3947	6.4196	6.40715	0.017607	0.00274802	6.1892	5.9796	6.0844	0.14821	0.0243589	8.7363	9.9346	9.33545	0.847326	0.0907644	7.40117				7.40117	1.75249	0.236786
497193	7.7105	7.8614	7.78595	0.106702	0.0137045	5.9279	6.1678	6.04785	0.169635	0.0280488	5.9257	6.0819	6.0038	0.11045	0.0183967	5.4154	4.9939	5.20465	0.298046	0.0572652	5.4789	6.2428	5.86085	0.540159	0.0921639	6.18062				6.18062	0.959264	0.155205
497202	6.3163	5.8302	6.07325	0.343725	0.0565965	4.2757	4.1675	4.2216	0.076509	0.0181232	4.1461	4.1469	4.1465	0.000565685	0.000136425	4.9891	5.092	5.04055	0.0727613	0.0144352	5.5416	5.5971	5.56935	0.0392444	0.0070465	5.01025				5.01025	0.838378	0.167333
497203	8.7035	10.0019	9.3527	0.918107	0.098165	6.9312	6.3768	6.654	0.39202	0.0589149	6.1946	6.7543	6.47445	0.395768	0.0611276	5.634	5.9674	5.8007	0.235749	0.0406415	7.4755	6.6772	7.07635	0.564483	0.0797704	7.07164				7.07164	1.35551	0.191682
497237	5.216	5.1653	5.19065	0.0358503	0.00690671	5.6365	5.9047	5.7706	0.189646	0.0328642	6.7686	6.3677	6.56815	0.283479	0.0431597	4.961	5.0401	5.00055	0.0559321	0.0111852	5.7859	5.4978	5.64185	0.203717	0.0361083	5.63436				5.63436	0.610159	0.108292
497243	8.2541	8.5666	8.41035	0.220971	0.0262737	5.9217	5.936	5.92885	0.0101116	0.0017055	6.332	6.2484	6.2902	0.0591141	0.00939781	6.5035	7.4028	6.95315	0.635901	0.0914551	6.1214	7.2183	6.66985	0.775625	0.116288	6.85048				6.85048	0.953897	0.139245
497248	7.4423	7.1121	7.2772	0.233487	0.0320847	5.3856	5.2722	5.3289	0.0801859	0.0150474	5.7441	5.8712	5.80765	0.0898733	0.015475	5.5596	5.5819	5.57075	0.0157685	0.00283058	6.5519	6.5336	6.54275	0.0129401	0.00197777	6.10545				6.10545	0.797159	0.130565
497251	6.407	6.7408	6.5739	0.236032	0.0359044	4.6727	4.7815	4.7271	0.0769332	0.0162749	5.3568	5.4266	5.3917	0.0493561	0.00915408	5.499	5.3469	5.42295	0.107551	0.0198326	5.9579	6.7549	6.3564	0.563564	0.0886609	5.69441				5.69441	0.760386	0.133532
497252	6.1741	5.8645	6.0193	0.21892	0.0363697	4.624	4.6101	4.61705	0.00982878	0.0021288	4.7605	4.7819	4.7712	0.0151321	0.00317155	4.7713	4.0456	4.40845	0.513147	0.116401	5.0623	5.2364	5.14935	0.123107	0.0239073	4.99307				4.99307	0.634423	0.127061
497261	10.2155	12.6253	11.4204	1.70399	0.149205	5.4669	5.8725	5.6697	0.286803	0.0505851	5.6824	5.7081	5.69525	0.0181726	0.00319084	7.1275	6.9009	7.0142	0.16023	0.0228437	7.1106	9.3622	8.2364	1.59212	0.193303	7.60719				7.60719	2.38209	0.313137
497272	9.1244	9.3987	9.26155	0.193959	0.0209424	5.7519	5.6288	5.69035	0.0870448	0.0152969	6.0297	5.9486	5.98915	0.0573464	0.00957504	7.1792	7.2713	7.22525	0.0651245	0.00901346	6.5293	7.6464	7.08785	0.789909	0.111445	7.05083				7.05083	1.40509	0.199281
497276	9.1399	8.7975	8.9687	0.242113	0.0269954	5.5705	5.5059	5.5382	0.0456791	0.008248	4.9587	4.8518	4.90525	0.0755897	0.01541	5.3359	4.9909	5.1634	0.243952	0.0472464	7.0309	7.0248	7.02785	0.00431335	0.000613751	6.32068				6.32068	1.69316	0.267876
497302	6.9689	7.0394	7.00415	0.049851	0.00711736	5.2578	5.3274	5.2926	0.0492146	0.00929876	6.3038	5.7835	6.04365	0.367908	0.0608751	4.1413	4.0147	4.078	0.0895197	0.0219519	4.6033	4.6059	4.6046	0.00183848	0.00039927	5.4046				5.4046	1.15967	0.214571
519611	7.3221	6.1821	6.7521	0.806102	0.119385	6.2398	5.473	5.8564	0.542209	0.0925841	5.414	5.7264	5.5702	0.2209	0.0396575	5.1844	4.6373	4.91085	0.386858	0.0787762	5.0862	5.1929	5.13955	0.0754483	0.0146799	5.64582				5.64582	0.719446	0.12743
519622	7.7442	7.9158	7.83	0.12134	0.0154967	6.6993	6.5091	6.6042	0.134492	0.0203646	6.2355	6.1999	6.2177	0.025173	0.0040486	4.019	4.0821	4.05055	0.0446184	0.0110154	4.4421	4.6996	4.57085	0.18208	0.039835	5.85466				5.85466	1.54099	0.263207
575054	8.735	9.2216	8.9783	0.344078	0.0383233	4.8445	4.9809	4.9127	0.0964494	0.0196327	5.1934	5.0049	5.09915	0.13329	0.0261396	4.3748	4.4602	4.4175	0.0603869	0.0136699	8.5945	8.7307	8.6626	0.0963079	0.0111177	6.41405				6.41405	2.21363	0.345122
mn1	7.1051	6.8907	6.9979	0.151604	0.0216642	6.628	6.9617	6.79485	0.235962	0.0347265	5.9237	6.7075	6.3156	0.55423	0.0877558	7.3801	6.9051	7.1426	0.335876	0.0470243	4.8547	4.841	4.84785	0.00968736	0.00199828	6.41976				6.41976	0.932629	0.145275
mn2	7.4937	7.5024	7.49805	0.00615183	0.000820457	6.5234	6.5234	6.5234	0	0	6.6615	6.6645	6.663	0.00212132	0.000318373	7.2647	7.3762	7.32045	0.0788424	0.0107702	8.0068	8.5265	8.26665	0.367483	0.0444537	7.25431				7.25431	0.702227	0.0968014
mn3	6.6704	6.877	6.7737	0.146088	0.021567	8.2602	8.2811	8.27065	0.0147785	0.00178686	5.9375	6.2947	6.1161	0.252579	0.0412973	4.7899	4.4852	4.63755	0.215455	0.0464589	7.0684	7.2982	7.1833	0.162493	0.022621	6.59626				6.59626	1.34599	0.204054
mn8	7.314	7.5972	7.4556	0.200253	0.0268594	5.778	6.0854	5.9317	0.217365	0.0366446	5.9628	5.9226	5.9427	0.0284257	0.0047833	5.6577	5.6277	5.6427	0.0212132	0.00375941	6.0996	6.1656	6.1326	0.046669	0.00760999	6.22106				6.22106	0.711974	0.114446
mn9	7.8764	7.8068	7.8416	0.0492146	0.0062761	5.3327	6.1266	5.72965	0.561372	0.0979767	7.5107	7.4251	7.4679	0.0605283	0.00810514	5.0201	5.0595	5.0398	0.02786	0.005528	6.1225	5.5773	5.8499	0.385515	0.0659011	6.38577				6.38577	1.20621	0.18889
mn10	5.0842	5.0637	5.07395	0.0144957	0.00285688	6.0209	5.7936	5.90725	0.160725	0.0272082	5.5439	5.5988	5.57135	0.0388202	0.00696782	4.8791	5.0804	4.97975	0.142341	0.0285839	4.6895	8.3787	6.5341	2.60866	0.399238	5.61328				5.61328	0.638029	0.113664
mn14	5.2616	5.2908	5.2762	0.0206475	0.00391333	5.2499	5.2382	5.24405	0.00827315	0.00157763	5.1835	5.0796	5.13155	0.0734684	0.014317	4.7443	5.1563	4.9503	0.291328	0.0588506	6.0448	6.3137	6.17925	0.190141	0.0307709	5.35627				5.35627	0.477392	0.0891276
mn15	6.5058	6.5884	6.5471	0.058407	0.00892105	5.673	5.9473	5.81015	0.193959	0.0333829	5.0617	5.2571	5.1594	0.138169	0.02678	4.8051	4.95	4.87755	0.10246	0.0210064	7.2515	8.1268	7.68915	0.618931	0.080494	6.01667				6.01667	1.13509	0.188657
mn16	5.4346	5.5231	5.47885	0.062579	0.0114219	4.0342	3.8929	3.96355	0.0999142	0.0252083	3.6729	3.7118	3.69235	0.0275065	0.00744958	3.9336	4.0007	3.96715	0.0474469	0.0119599	4.2323	4.2949	4.2636	0.0442649	0.010382	4.2731				4.2731	0.703673	0.164675
mn22	5.4895	5.8729	5.6812	0.271105	0.0477196	8.0121	8.4602	8.23615	0.316855	0.0384712	7.168	7.4405	7.30425	0.192687	0.0263801	7.2558	7.3771	7.31645	0.0857721	0.0117232	9.5121	9.2097	9.3609	0.213829	0.0228428	7.57979				7.57979	1.35583	0.178874
mn24	8.2412	8.0217	8.13145	0.15521	0.0190876	8.4884	8.6331	8.56075	0.102318	0.011952	7.6579	7.5631	7.6105	0.0670337	0.00880806	8.6629	7.7506	8.20675	0.645094	0.0786052	11.8599	10.2008	11.0303	1.17316	0.106358	8.70796				8.70796	1.34194	0.154104
mn2i	7.1612	6.9696	7.0654	0.135482	0.0191754	5.9533	5.9878	5.97055	0.0243952	0.00408592	5.941	6.2327	6.08685	0.206263	0.0338867	4.2162	4.7207	4.46845	0.356735	0.0798343	6.2671	6.7142	6.49065	0.316147	0.0487081	6.01638				6.01638	0.96547	0.160474
MEAN			7.47793	0.282258	0.0367392			5.64358	0.142405	0.0249013			5.62333	0.129559	0.0225203			5.64643	0.230612	0.0408384			6.41303	0.355109	0.051971					6.16086	0.809231	0.13135
STD			1.4016					0.920949					0.892521					1.0374					1.40355					0.182384				0.178317
CV			0.187432					0.163185					0.158718					0.183726					0.218859			MEAN	6.16086
																										STD	0.833381
																										CV	0.13527

## Sheet: Number of Objects
	Top view front		Mean +/-SD		CV	Right side		Mean +/-SD		CV	Left side		Mean +/-SD		CV	Front		Mean +/-SD		CV	Back		Mean +/-SD		CV
Indiv	image 1	image 2	mean	sd		Image 1	Image2	mean	sd		Image 1	Image2	mean	sd		Image 1	Image2	mean	sd		Image 1	Image2	mean	sd		MEAN				MEAN Views	STD Views	CV Views
17923	1	1	1	0	0	6	6	6	0	0	3	3	3	0	0	5	4	4.5	0.707107	0.157135	1	1	1	0	0	3.1	3.1			3.1	2.19089	0.706739
20544	16	14	15	1.41421	0.0942809	15	12	13.5	2.12132	0.157135	14	14	14	0	0	8	7	7.5	0.707107	0.0942809	5	8	6.5	2.12132	0.326357	11.3				11.3	3.97806	0.352041
22468	12	11	11.5	0.707107	0.0614875	15	13	14	1.41421	0.101015	2	2	2	0	0	2	2	2	0	0	1	1	1	0	0	6.1				6.1	6.14817	1.0079
22609	21	22	21.5	0.707107	0.0328887	18	19	18.5	0.707107	0.038222	32	31	31.5	0.707107	0.0224478	12	11	11.5	0.707107	0.0614875	15	13	14	1.41421	0.101015	19.4				19.4	7.79744	0.40193
22612	11	14	12.5	2.12132	0.169706	25	24	24.5	0.707107	0.0288615	16	21	18.5	3.53553	0.19111	9	9	9	0	0	6	7	6.5	0.707107	0.108786	14.2				14.2	7.31095	0.514856
22613	9	8	8.5	0.707107	0.083189	2	2	2	0	0	16	15	15.5	0.707107	0.0456198	4	3	3.5	0.707107	0.202031	2	2	2	0	0	6.3				6.3	5.79439	0.919745
22614	10	11	10.5	0.707107	0.0673435	19	14	16.5	3.53553	0.214275	17	18	17.5	0.707107	0.0404061	19	14	16.5	3.53553	0.214275	17	18	17.5	0.707107	0.0404061	15.7				15.7	2.94958	0.187871
27761	18	14	16	2.82843	0.176777	17	17	17	0	0	22	21	21.5	0.707107	0.0328887	8	7	7.5	0.707107	0.0942809	2	1	1.5	0.707107	0.471405	12.7				12.7	8.0514	0.633968
36684	5	5	5	0	0	12	12	12	0	0	11	11	11	0	0	5	6	5.5	0.707107	0.128565	6	5	5.5	0.707107	0.128565	7.8				7.8	3.40221	0.43618
42824	7	7	7	0	0	2	2	2	0	0	7	7	7	0	0	10	10	10	0	0	12	14	13	1.41421	0.108786	7.8				7.8	4.08656	0.523918
42825	8	8	8	0	0	5	5	5	0	0	5	4	4.5	0.707107	0.157135	5	5	5	0	0	2	2	2	0	0	4.9				4.9	2.13307	0.435321
45769	6	6	6	0	0	9	9	9	0	0	13	13	13	0	0	8	8	8	0	0	4	4	4	0	0	8				8	3.39116	0.423896
45779	6	6	6	0	0	2	2	2	0	0	8	8	8	0	0	8	11	9.5	2.12132	0.223297	3	3	3	0	0	5.7				5.7	3.19374	0.560306
49607	6	6	6	0	0	9	8	8.5	0.707107	0.083189	16	14	15	1.41421	0.0942809	6	6	6	0	0	16	14	15	1.41421	0.0942809	10.1				10.1	4.58803	0.45426
52615	16	16	16	0	0	17	18	17.5	0.707107	0.0404061	21	20	20.5	0.707107	0.034493	8	9	8.5	0.707107	0.083189	2	3	2.5	0.707107	0.282843	13				13	7.34847	0.565267
65908	6	4	5	1.41421	0.282843	19	16	17.5	2.12132	0.121218	17	19	18	1.41421	0.0785674	11	10	10.5	0.707107	0.0673435	11	11	11	0	0	12.4				12.4	5.42448	0.437458
139661	5	4	4.5	0.707107	0.157135	3	3	3	0	0	5	4	4.5	0.707107	0.157135	3	3	3	0	0	3	2	2.5	0.707107	0.282843	3.5				3.5	0.935414	0.267261
141485	5	7	6	1.41421	0.235702	8	6	7	1.41421	0.202031	10	10	10	0	0	3	3	3	0	0	7	8	7.5	0.707107	0.0942809	6.7				6.7	2.53969	0.379057
203066	10	10	10	0	0	10	9	9.5	0.707107	0.0744323	7	4	5.5	2.12132	0.385695	5	5	5	0	0	3	3	3	0	0	6.6				6.6	3.02903	0.458943
203309	8	6	7	1.41421	0.202031	9	8	8.5	0.707107	0.083189	8	7	7.5	0.707107	0.0942809	12	11	11.5	0.707107	0.0614875	2	5	3.5	2.12132	0.606092	7.6				7.6	2.88097	0.379075
288185	10	8	9	1.41421	0.157135	8	12	10	2.82843	0.282843	16	18	17	1.41421	0.083189	8	6	7	1.41421	0.202031	9	8	8.5	0.707107	0.083189	10.3				10.3	3.89872	0.378516
288186	8	7	7.5	0.707107	0.0942809	14	12	13	1.41421	0.108786	13	12	12.5	0.707107	0.0565685	8	7	7.5	0.707107	0.0942809	2	2	2	0	0	8.5				8.5	4.48609	0.527775
288187	9	6	7.5	2.12132	0.282843	2	2	2	0	0	13	15	14	1.41421	0.101015	7	8	7.5	0.707107	0.0942809	4	4	4	0	0	7				7	4.56892	0.652702
288189	10	8	9	1.41421	0.157135	19	17	18	1.41421	0.0785674	14	16	15	1.41421	0.0942809	19	17	18	1.41421	0.0785674	14	16	15	1.41421	0.0942809	15				15	3.67423	0.244949
288199	14	15	14.5	0.707107	0.048766	28	26	27	1.41421	0.0523783	14	12	13	1.41421	0.108786	13	9	11	2.82843	0.25713	5	4	4.5	0.707107	0.157135	14				14	8.20823	0.586302
288210	18	21	19.5	2.12132	0.108786	10	9	9.5	0.707107	0.0744323	5	5	5	0	0	7	5	6	1.41421	0.235702	3	3	3	0	0	8.6				8.6	6.53261	0.759606
324296	7	7	7	0	0	2	1	1.5	0.707107	0.471405	7	7	7	0	0	11	10	10.5	0.707107	0.0673435	10	9	9.5	0.707107	0.0744323	7.1				7.1	3.48927	0.491446
326308	3	3	3	0	0	6	6	6	0	0	4	4	4	0	0	3	3	3	0	0	2	1	1.5	0.707107	0.471405	3.5				3.5	1.65831	0.473804
497193	18	18	18	0	0	9	9	9	0	0	11	11	11	0	0	7	9	8	1.41421	0.176777	6	6	6	0	0	10.4				10.4	4.61519	0.443768
497202	8	7	7.5	0.707107	0.0942809	5	4	4.5	0.707107	0.157135	10	11	10.5	0.707107	0.0673435	3	2	2.5	0.707107	0.282843	2	2	2	0	0	5.4				5.4	3.57771	0.662539
497203	8	8	8	0	0	4	8	6	2.82843	0.471405	14	11	12.5	2.12132	0.169706	8	7	7.5	0.707107	0.0942809	14	11	12.5	2.12132	0.169706	9.3				9.3	3.01247	0.323922
497237	14	18	16	2.82843	0.176777	7	8	7.5	0.707107	0.0942809	3	5	4	1.41421	0.353553	7	7	7	0	0	3	4	3.5	0.707107	0.202031	7.6				7.6	5.01747	0.660193
497243	7	7	7	0	0	6	5	5.5	0.707107	0.128565	5	5	5	0	0	5	4	4.5	0.707107	0.157135	3	2	2.5	0.707107	0.282843	4.9				4.9	1.63554	0.333784
497248	8	8	8	0	0	11	11	11	0	0	8	8	8	0	0	11	11	11	0	0	8	8	8	0	0	9.2				9.2	1.64317	0.178605
497251	5	3	4	1.41421	0.353553	12	11	11.5	0.707107	0.0614875	6	5	5.5	0.707107	0.128565	3	4	3.5	0.707107	0.202031	1	1	1	0	0	5.1				5.1	3.92747	0.770092
497252	13	14	13.5	0.707107	0.0523783	10	11	10.5	0.707107	0.0673435	12	10	11	1.41421	0.128565	9	9	9	0	0	2	3	2.5	0.707107	0.282843	9.3				9.3	4.13219	0.444322
497261	3	3	3	0	0	4	2	3	1.41421	0.471405	7	6	6.5	0.707107	0.108786	7	7	7	0	0	1	1	1	0	0	4.1				4.1	2.5593	0.624219
497272	3	4	3.5	0.707107	0.202031	8	9	8.5	0.707107	0.083189	5	5	5	0	0	3	3	3	0	0	4	2	3	1.41421	0.471405	4.6				4.6	2.32916	0.50634
497276	4	5	4.5	0.707107	0.157135	7	7	7	0	0	7	7	7	0	0	7	8	7.5	0.707107	0.0942809	6	5	5.5	0.707107	0.128565	6.3				6.3	1.25499	0.199205
497302	5	8	6.5	2.12132	0.326357	2	2	2	0	0	1	2	1.5	0.707107	0.471405	2	2	2	0	0	1	1	1	0	0	2.6				2.6	2.21923	0.853552
519611	8	10	9	1.41421	0.157135	7	6	6.5	0.707107	0.108786	8	6	7	1.41421	0.202031	7	6	6.5	0.707107	0.108786	8	6	7	1.41421	0.202031	7.2				7.2	1.03682	0.144003
519622	1	1	1	0	0	3	3	3	0	0	5	5	5	0	0	3	3	3	0	0	1	2	1.5	0.707107	0.471405	2.7				2.7	1.56525	0.579721
575054	10	11	10.5	0.707107	0.0673435	15	13	14	1.41421	0.101015	10	9	9.5	0.707107	0.0744323	8	7	7.5	0.707107	0.0942809	5	5	5	0	0	9.3				9.3	3.36526	0.361856
mn1	8	8	8	0	0	9	8	8.5	0.707107	0.083189	7	6	6.5	0.707107	0.108786	4	4	4	0	0	4	6	5	1.41421	0.282843	6.4				6.4	1.91703	0.299536
mn2	9	9	9	0	0	15	15	15	0	0	15	19	17	2.82843	0.166378	5	5	5	0	0	5	5	5	0	0	10.2				10.2	5.5857	0.547617
mn3	13	14	13.5	0.707107	0.0523783	14	13	13.5	0.707107	0.0523783	21	19	20	1.41421	0.0707107	15	13	14	1.41421	0.101015	4	4	4	0	0	13				13	5.73367	0.441052
mn8	10	11	10.5	0.707107	0.0673435	12	13	12.5	0.707107	0.0565685	13	13	13	0	0	7	6	6.5	0.707107	0.108786	6	6	6	0	0	9.7				9.7	3.29014	0.339189
mn9	2	2	2	0	0	4	6	5	1.41421	0.282843	4	3	3.5	0.707107	0.202031	5	4	4.5	0.707107	0.157135	1	1	1	0	0	3.2				3.2	1.68077	0.525242
mn10	8	7	7.5	0.707107	0.0942809	8	14	11	4.24264	0.385695	7	7	7	0	0	9	9	9	0	0	7	2	4.5	3.53553	0.785674	7.8				7.8	2.4135	0.309424
mn14	10	11	10.5	0.707107	0.0673435	16	14	15	1.41421	0.0942809	17	17	17	0	0	6	6	6	0	0	3	3	3	0	0	10.3				10.3	5.89067	0.57191
mn15	13	13	13	0	0	8	6	7	1.41421	0.202031	8	8	8	0	0	13	11	12	1.41421	0.117851	2	2	2	0	0	8.4				8.4	4.39318	0.522997
mn16	4	4	4	0	0	3	3	3	0	0	6	6	6	0	0	3	3	3	0	0	4	4	4	0	0	4				4	1.22474	0.306186
mn22	10	11	10.5	0.707107	0.0673435	18	18	18	0	0	21	19	20	1.41421	0.0707107	12	13	12.5	0.707107	0.0565685	5	5	5	0	0	13.2				13.2	6.00625	0.455019
mn24	9	9	9	0	0	17	16	16.5	0.707107	0.042855	21	23	22	1.41421	0.0642824	13	17	15	2.82843	0.188562	7	6	6.5	0.707107	0.108786	13.8				13.8	6.17049	0.447137
mn2i	11	11	11	0	0	7	7	7	0	0	7	7	7	0	0	4	4	4	0	0	2	2	2	0	0	6.2				6.2	3.42053	0.551698
MEAN			8.88182	0.681394	0.0790547			9.85455	0.822815	0.0937606			10.7545	0.707107	0.0757306			7.32727	0.642824	0.0792189			5.1	0.578542	0.125713					8.38364	2.23222	0.266259
STD			4.5633					5.89623					6.27375					3.72457					4.07044					0.600381				0.479116
CV			0.51378					0.598326					0.583358					0.508315					0.798126			MEAN	8.38364
																										STD	3.73263
																										CV	0.445228

## Sheet: Perimeter Divided Area
	Top view front		Mean +/-SD		CV	Right side		Mean +/-SD		CV	Left side		Mean +/-SD		CV	Front		Mean +/-SD		CV	Back		Mean +/-SD		CV
Indiv	image 1	image 2	mean	sd		Image 1	Image2	mean	sd		Image 1	Image2	mean	sd		Image 1	Image2	mean	sd		Image 1	Image2	mean	sd		MEAN				MEAN Views	STD Views	CV Views
17923	0.545	0.5329	0.53895	0.00855599	0.0158753	0.9428	0.8885	0.91565	0.0383959	0.0419329	0.8341	0.8264	0.83025	0.00544472	0.00655793	1.0744	1.1649	1.11965	0.0639932	0.0571546	0.6592	0.6875	0.67335	0.0200111	0.0297188	0.81557	0.81557			0.81557	0.223294	0.273789
20544	0.8244	0.8419	0.83315	0.0123744	0.0148525	0.9955	1.0325	1.014	0.026163	0.0258017	1.1392	1.0931	1.11615	0.0325976	0.0292054	1.1069	1.1572	1.13205	0.0355675	0.0314186	0.9076	0.8988	0.9032	0.00622254	0.00688944	0.99971				0.99971	0.130703	0.130741
22468	0.4633	0.4744	0.46885	0.00784889	0.0167407	0.5515	0.5786	0.56505	0.0191626	0.0339131	0.5646	0.5738	0.5692	0.00650538	0.011429	0.8791	0.8979	0.8885	0.0132936	0.0149619	0.5067	0.5702	0.53845	0.0449013	0.0833899	0.60601				0.60601	0.16295	0.26889
22609	0.756	0.7756	0.7658	0.0138593	0.0180978	0.865	0.8457	0.85535	0.0136472	0.0159551	0.9028	0.9222	0.9125	0.0137179	0.0150333	1.2717	1.3096	1.29065	0.0267993	0.0207642	0.9732	0.9822	0.9777	0.00636396	0.00650911	0.9604				0.9604	0.200352	0.208613
22612	1.0623	0.9796	1.02095	0.0584777	0.0572778	1.1829	1.195	1.18895	0.00855599	0.00719626	1.0715	1.08	1.07575	0.00601041	0.00558718	1.7473	1.894	1.82065	0.103733	0.0569756	0.8569	0.9362	0.89655	0.0560736	0.0625437	1.20057				1.20057	0.362252	0.301733
22613	0.9389	0.8936	0.91625	0.0320319	0.0349598	1.0643	1.0541	1.0592	0.00721249	0.00680937	1.0597	1.1041	1.0819	0.0313955	0.0290189	0.9386	0.9959	0.96725	0.0405172	0.0418891	0.6217	0.6896	0.65565	0.0480126	0.0732289	0.93605				0.93605	0.170608	0.182263
22614	0.7391	0.7348	0.73695	0.00304056	0.00412587	0.9976	1.002	0.9998	0.00311127	0.00311189	0.9862	1.0082	0.9972	0.0155563	0.0156	1.2907	1.3998	1.34525	0.0771453	0.0573465	0.7083	0.7061	0.7072	0.00155563	0.00219971	0.95728				0.95728	0.257394	0.268881
27761	1.095	0.8965	0.99575	0.140361	0.14096	1.0106	0.9822	0.9964	0.0200818	0.0201544	1.109	1.1103	1.10965	0.000919239	0.000828404	1.2823	1.3771	1.3297	0.0670337	0.0504127	0.8537	0.8941	0.8739	0.0285671	0.0326892	1.06108				1.06108	0.171758	0.161871
36684	0.6734	0.6307	0.65205	0.0301935	0.0463054	0.9013	0.9354	0.91835	0.0241123	0.0262562	0.8086	0.7462	0.7774	0.0441235	0.0567577	0.994	1.0231	1.00855	0.0205768	0.0204024	0.7371	0.7647	0.7509	0.0195161	0.0259903	0.82145				0.82145	0.14143	0.172171
42824	0.7504	0.6958	0.7231	0.038608	0.0533924	0.8646	0.876	0.8703	0.00806102	0.00926234	0.8215	0.7934	0.80745	0.0198697	0.024608	0.9749	0.9086	0.94175	0.0468812	0.0497809	0.6954	0.6943	0.69485	0.000777817	0.0011194	0.80749				0.80749	0.102201	0.126566
42825	0.512	0.5174	0.5147	0.00381838	0.00741865	0.7023	0.6952	0.69875	0.00502046	0.00718491	0.6414	0.7498	0.6956	0.0766504	0.110193	0.7851	0.7916	0.78835	0.00459619	0.00583014	0.5884	0.591	0.5897	0.00183848	0.00311765	0.65742				0.65742	0.106376	0.161809
45769	0.5609	0.5613	0.5611	0.000282843	0.000504086	0.8856	0.8677	0.87665	0.0126572	0.0144382	0.9863	0.9718	0.97905	0.010253	0.0104724	1.0468	1.0306	1.0387	0.0114551	0.0110283	0.6691	0.6705	0.6698	0.000989949	0.00147798	0.82506				0.82506	0.203591	0.246759
45779	0.752	0.7285	0.74025	0.016617	0.0224478	1.0696	1.0425	1.05605	0.0191626	0.0181455	1.1094	1.1459	1.12765	0.0258094	0.0228878	1.2001	1.128	1.16405	0.0509824	0.0437974	0.5518	0.5687	0.56025	0.0119501	0.02133	0.92965				0.92965	0.265732	0.28584
49607	0.6066	0.5924	0.5995	0.0100409	0.0167488	0.8354	0.8516	0.8435	0.0114551	0.0135805	0.8338	0.8515	0.84265	0.0125158	0.0148529	1.0406	1.0918	1.0662	0.0362039	0.033956	0.7616	0.7389	0.75025	0.0160513	0.0213946	0.82042				0.82042	0.169679	0.20682
52615	0.7278	0.7406	0.7342	0.00905097	0.0123277	0.9604	0.9836	0.972	0.0164049	0.0168774	0.9263	0.9338	0.93005	0.0053033	0.00570217	1.0211	1.0139	1.0175	0.00509117	0.00500361	0.7052	0.6624	0.6838	0.0302642	0.0442588	0.86751				0.86751	0.149036	0.171798
65908	0.9146	0.9217	0.91815	0.00502046	0.00546802	0.9131	0.9475	0.9303	0.0243245	0.0261469	0.9917	0.9686	0.98015	0.0163342	0.016665	1.2237	1.2382	1.23095	0.010253	0.00832938	1.2835	1.3008	1.29215	0.0122329	0.00946713	1.07034				1.07034	0.177414	0.165755
139661	0.8478	0.8129	0.83035	0.024678	0.02972	0.7723	0.8176	0.79495	0.0320319	0.0402943	0.7938	1.0117	0.90275	0.154079	0.170677	1.1215	1.1416	1.13155	0.0142128	0.0125605	1.2477	1.2843	1.266	0.0258801	0.0204424	0.98512				0.98512	0.204474	0.207563
141485	0.9007	0.935	0.91785	0.0242538	0.0264245	0.905	0.9976	0.9513	0.0654781	0.0688301	1.109	1.0492	1.0791	0.042285	0.0391854	0.9655	0.9824	0.97395	0.0119501	0.0122697	1.3785	1.3136	1.34605	0.0458912	0.0340933	1.05365				1.05365	0.174223	0.165352
203066	0.8887	0.9241	0.9064	0.0250316	0.0276165	1.2046	1.1765	1.19055	0.0198697	0.0166895	1.1358	1.1645	1.15015	0.020294	0.0176446	1.1546	1.0916	1.1231	0.0445477	0.039665	0.8774	0.7972	0.8373	0.05671	0.0677296	1.0415				1.0415	0.15861	0.15229
203309	0.7473	0.6664	0.70685	0.0572049	0.0809294	0.973	1.0104	0.9917	0.0264458	0.0266671	0.7981	0.814	0.80605	0.011243	0.0139483	0.8809	0.8388	0.85985	0.0297692	0.0346214	0.7127	0.7089	0.7108	0.00268701	0.00378026	0.81505				0.81505	0.118183	0.145001
288185	0.8675	0.7928	0.83015	0.0528209	0.0636281	0.8761	0.6955	0.7858	0.127703	0.162514	1.2064	1.1295	1.16795	0.0543765	0.0465572	0.9708	1.0565	1.01365	0.0605991	0.059783	1.1944	1.2476	1.221	0.0376181	0.0308092	1.00371				1.00371	0.194869	0.194149
288186	0.6197	0.5879	0.6038	0.022486	0.0372408	0.8723	0.8782	0.87525	0.00417193	0.00476656	1.0132	1.0768	1.045	0.044972	0.0430354	0.8584	0.9409	0.89965	0.0583363	0.0648433	0.5431	0.5427	0.5429	0.000282843	0.000520985	0.79332				0.79332	0.212126	0.26739
288187	0.9786	1.0742	1.0264	0.0675994	0.0658607	0.9965	0.9125	0.9545	0.059397	0.0622284	0.9955	0.8956	0.94555	0.07064	0.0747078	0.9871	1.0976	1.04235	0.0781353	0.0749607	0.8657	0.8325	0.8491	0.0234759	0.027648	0.96358				0.96358	0.076916	0.0798231
288189	0.7256	0.7372	0.7314	0.00820244	0.0112147	0.9675	1.0249	0.9962	0.0405879	0.0407428	0.9349	0.9533	0.9441	0.0130108	0.0137811	0.8837	0.9268	0.90525	0.0304763	0.0336662	0.6622	0.6038	0.633	0.041295	0.065237	0.84199				0.84199	0.153392	0.182177
288199	0.8	0.8841	0.84205	0.0594677	0.0706225	1.2375	1.2255	1.2315	0.00848528	0.0068902	1.0674	1.0558	1.0616	0.00820244	0.00772649	1.2441	1.4684	1.35625	0.158604	0.116943	0.8456	0.8829	0.86425	0.0263751	0.0305179	1.07113				1.07113	0.224933	0.209996
288210	0.867	0.9755	0.92125	0.0767211	0.0832793	0.8847	0.9159	0.9003	0.0220617	0.0245049	0.8423	0.8459	0.8441	0.00254558	0.00301574	1.0265	1.0425	1.0345	0.0113137	0.0109364	0.5998	0.5936	0.5967	0.00438406	0.00734718	0.85937				0.85937	0.16233	0.188894
324296	0.5847	0.6017	0.5932	0.0120208	0.0202644	0.7451	0.7638	0.75445	0.0132229	0.0175265	0.764	0.7471	0.75555	0.0119501	0.0158164	1.1455	1.1007	1.1231	0.0316784	0.0282062	0.6487	0.7558	0.70225	0.0757311	0.107841	0.78571				0.78571	0.19984	0.254344
326308	0.5645	0.5476	0.55605	0.0119501	0.0214911	0.9673	0.8385	0.9029	0.0910754	0.10087	0.8317	0.8308	0.83125	0.000636396	0.000765589	0.9539	0.9245	0.9392	0.0207889	0.0221347	0.4417	0.4803	0.461	0.0272943	0.0592068	0.73808				0.73808	0.215757	0.292322
497193	0.8258	0.794	0.8099	0.022486	0.0277639	0.8215	0.9274	0.87445	0.0748826	0.085634	1.0117	1.0434	1.02755	0.0224153	0.0218143	1.3164	1.1636	1.24	0.108046	0.0871338	0.9352	1.0565	0.99585	0.0857721	0.0861295	0.98955				0.98955	0.165628	0.167377
497202	0.6677	0.7504	0.70905	0.0584777	0.0824734	1.1605	1.1541	1.1573	0.00452548	0.00391038	1.0323	1.0198	1.02605	0.00883883	0.00861443	0.9095	1.047	0.97825	0.0972272	0.0993889	0.5503	0.5639	0.5571	0.00961665	0.017262	0.88555				0.88555	0.245567	0.277305
497203	0.9148	0.8442	0.8795	0.0499217	0.0567615	0.9972	0.8468	0.922	0.106349	0.115346	1.1293	1.1358	1.13255	0.00459619	0.00405827	1.3713	1.3641	1.3677	0.00509117	0.00372243	0.9912	1.0106	1.0009	0.0137179	0.0137055	1.06053				1.06053	0.196887	0.18565
497237	1.0252	1.0684	1.0468	0.030547	0.0291813	0.9123	1.0148	0.96355	0.0724784	0.0752202	0.8062	0.8209	0.81355	0.0103945	0.0127767	1.2628	1.3719	1.31735	0.0771453	0.058561	1.0178	0.8596	0.9387	0.111864	0.119169	1.01599				1.01599	0.188064	0.185105
497243	0.9271	0.8943	0.9107	0.0231931	0.0254673	0.9814	0.988	0.9847	0.0046669	0.00473942	0.9273	0.9312	0.92925	0.00275772	0.00296768	1.0688	1.1086	1.0887	0.0281428	0.02585	0.8124	0.9013	0.85685	0.0628618	0.0733638	0.95404				0.95404	0.0880513	0.0922931
497248	0.667	0.6487	0.65785	0.0129401	0.0196702	1.1326	1.1021	1.11735	0.0215668	0.0193017	0.9641	0.9742	0.96915	0.00714178	0.00736912	0.9558	0.959	0.9574	0.00226274	0.00236342	0.7189	0.724	0.72145	0.00360624	0.00499861	0.88464				0.88464	0.190167	0.214966
497251	0.8105	0.755	0.78275	0.0392444	0.0501366	0.9609	0.9644	0.96265	0.00247487	0.0025709	0.8	0.8087	0.80435	0.00615183	0.0076482	1.0222	1.0173	1.01975	0.00346482	0.00339772	0.5983	0.6178	0.60805	0.0137886	0.0226767	0.83551				0.83551	0.162482	0.19447
497252	0.9574	1.0075	0.98245	0.035426	0.0360589	1.2175	1.1788	1.19815	0.027365	0.0228394	1.1059	1.1185	1.1122	0.00890955	0.00801074	1.4883	1.2234	1.35585	0.187313	0.138151	0.9625	0.9342	0.94835	0.0200111	0.021101	1.1194				1.1194	0.165963	0.148261
497261	0.6986	0.6355	0.66705	0.0446184	0.0668892	0.8512	0.8241	0.83765	0.0191626	0.0228766	0.6431	0.7589	0.701	0.081883	0.116809	1.1779	1.1398	1.15885	0.0269408	0.0232478	0.3733	0.4238	0.39855	0.0357089	0.089597	0.75262				0.75262	0.277311	0.368461
497272	0.6844	0.6465	0.66545	0.0267993	0.0402725	0.9367	0.9538	0.94525	0.0120915	0.0127919	0.9513	0.9391	0.9452	0.0086267	0.00912685	0.937	0.9585	0.94775	0.0152028	0.0160409	0.7575	0.8382	0.79785	0.0570635	0.0715216	0.8603				0.8603	0.12643	0.146961
497276	0.8869	0.9256	0.90625	0.027365	0.0301959	1.3586	1.3614	1.36	0.0019799	0.00145581	1.2687	1.2421	1.2554	0.018809	0.0149825	1.572	1.5463	1.55915	0.0181726	0.0116555	1.1888	1.2945	1.24165	0.0747412	0.0601951	1.26449				1.26449	0.237111	0.187515
497302	0.5912	0.5846	0.5879	0.0046669	0.00793826	0.6686	0.649	0.6588	0.0138593	0.0210372	0.655	0.6309	0.64295	0.0170413	0.0265048	1.212	1.1371	1.17455	0.0529623	0.0450916	0.9388	0.9321	0.93545	0.00473762	0.00506453	0.79993				0.79993	0.24911	0.311415
519611	1.4311	1.5598	1.49545	0.0910046	0.0608544	1.352	1.2084	1.2802	0.101541	0.0793161	1.3429	1.3027	1.3228	0.0284257	0.021489	2.0529	1.8544	1.95365	0.140361	0.0718454	1.0087	0.9609	0.9848	0.0337997	0.0343214	1.40738				1.40738	0.356395	0.253233
519622	0.5615	0.563	0.56225	0.00106066	0.00188646	0.7968	0.7782	0.7875	0.0131522	0.0167012	0.8477	0.7854	0.81655	0.0440528	0.0539499	1.3054	1.256	1.2807	0.0349311	0.027275	1.2688	1.2408	1.2548	0.019799	0.0157786	0.94036				0.94036	0.314788	0.334753
575054	0.6775	0.6402	0.65885	0.0263751	0.040032	1.183	1.2136	1.1983	0.0216375	0.0180568	1.1601	1.1197	1.1399	0.0285671	0.0250611	1.468	1.4276	1.4478	0.0285671	0.0197314	0.757	0.76	0.7585	0.00212132	0.00279673	1.04067				1.04067	0.326288	0.313536
mn1	0.6112	0.6154	0.6133	0.00296985	0.00484241	0.7882	0.8284	0.8083	0.0284257	0.0351673	0.6342	0.7615	0.69785	0.0900147	0.128989	1.4957	1.4727	1.4842	0.0162635	0.0109577	0.7105	0.7019	0.7062	0.00608112	0.00861104	0.86197				0.86197	0.354643	0.411433
mn2	0.8328	0.8302	0.8315	0.00183848	0.00221104	0.8872	0.8872	0.8872	0	0	0.947	0.9851	0.96605	0.0269408	0.0278876	0.8348	0.8597	0.84725	0.017607	0.0207813	0.6388	0.6996	0.6692	0.0429921	0.064244	0.84024				0.84024	0.108873	0.129574
mn3	0.8663	0.8561	0.8612	0.00721249	0.00837493	0.904	0.9567	0.93035	0.0372645	0.0400543	0.9146	1.0096	0.9621	0.0671751	0.0698214	1.1335	1.1816	1.15755	0.0340118	0.0293826	0.724	0.7623	0.74315	0.0270822	0.0364424	0.93087				0.93087	0.15203	0.16332
mn8	0.7644	0.7347	0.74955	0.0210011	0.0280182	0.8205	0.8231	0.8218	0.00183848	0.00223714	0.9066	0.8883	0.89745	0.0129401	0.0144187	0.9561	1.0071	0.9816	0.0360624	0.0367384	0.7606	0.7599	0.76025	0.000494975	0.000651068	0.84213				0.84213	0.0977252	0.116045
mn9	0.6015	0.5965	0.599	0.00353553	0.00590239	0.7357	0.7716	0.75365	0.0253851	0.0336829	0.5703	0.5952	0.58275	0.017607	0.0302136	0.931	0.9066	0.9188	0.0172534	0.0187782	0.7354	0.7625	0.74895	0.0191626	0.0255859	0.72063				0.72063	0.136902	0.189975
mn10	0.8464	0.8513	0.84885	0.00346482	0.00408179	0.6009	0.6926	0.64675	0.0648417	0.100258	0.6533	0.6863	0.6698	0.0233345	0.034838	1.5049	1.5655	1.5352	0.0428507	0.0279121	0.8948	1.0343	0.96455	0.0986414	0.102267	0.93303				0.93303	0.361225	0.387153
mn14	0.8886	0.8843	0.88645	0.00304056	0.00343004	0.9415	0.9348	0.93815	0.00473762	0.00504996	0.9873	0.9775	0.9824	0.00692965	0.00705379	0.9918	1.0317	1.01175	0.0282136	0.0278859	0.7085	0.7156	0.71205	0.00502046	0.00705071	0.90616				0.90616	0.118377	0.130636
mn15	0.7669	0.7692	0.76805	0.00162635	0.0021175	0.7416	0.7559	0.74875	0.0101116	0.0135047	0.8399	0.8564	0.84815	0.0116673	0.0137561	0.9644	0.98	0.9722	0.0110309	0.0113463	0.3584	0.3639	0.36115	0.00388909	0.0107686	0.73966				0.73966	0.229131	0.309778
mn16	0.9067	0.8995	0.9031	0.00509117	0.00563744	1.1598	1.1674	1.1636	0.00537401	0.00461844	1.1404	1.1764	1.1584	0.0254558	0.021975	1.2819	1.3289	1.3054	0.033234	0.0254589	1.1704	1.2646	1.2175	0.0666095	0.05471	1.1496				1.1496	0.149933	0.130422
mn22	0.9375	0.8993	0.9184	0.0270115	0.0294115	0.6386	0.6667	0.65265	0.0198697	0.0304446	0.7053	0.7228	0.71405	0.0123744	0.0173298	0.8727	0.8643	0.8685	0.0059397	0.00683903	0.3856	0.3931	0.38935	0.0053033	0.0136209	0.70859				0.70859	0.208965	0.294902
mn24	0.8526	0.8505	0.85155	0.00148492	0.00174379	0.7415	0.7433	0.7424	0.00127279	0.00171443	0.7746	0.7705	0.77255	0.00289914	0.00375269	0.7678	0.7238	0.7458	0.0311127	0.0417172	0.446	0.4348	0.4404	0.0079196	0.0179827	0.71054				0.71054	0.157292	0.22137
mn2i	0.862	0.8863	0.87415	0.0171827	0.0196565	0.8168	0.8254	0.8211	0.00608112	0.00740606	0.8279	0.8347	0.8313	0.00480833	0.0057841	1.2385	1.2824	1.26045	0.031042	0.0246277	0.6775	0.6944	0.68595	0.0119501	0.0174212	0.89459				0.89459	0.216338	0.241829
MEAN			0.785686	0.0258583	0.030851			0.931859	0.0267453	0.0297314			0.928855	0.0246909	0.0279866			1.13615	0.041727	0.0351913			0.793556	0.0275874	0.034137					0.915222	0.142174	0.155344
STD			0.175895					0.170338					0.171449					0.242573					0.240203					0.221489				0.213155
CV			0.223875					0.182793					0.184581					0.213504					0.302692			MEAN	0.915222
																										STD	0.151579
																										CV	0.16562

## Sheet: Hue
	Top view front		Mean +/-SD		CV	Right side		Mean +/-SD		CV	Left side		Mean +/-SD		CV	Front		Mean +/-SD		CV	Back		Mean +/-SD		CV
Indiv	image 1	image 2	mean	sd		Image 1	Image2	mean	sd		Image 1	Image2	mean	sd		Image 1	Image2	mean	sd		Image 1	Image2	mean	sd		MEAN				MEAN Views	STD Views	CV Views
17923	0.0708	0.0688	0.0698	0.00141421	0.0202609	0.0783	0.0799	0.0791	0.00113137	0.014303	0.0757	0.076	0.07585	0.000212132	0.00279673	0.0864	0.0861	0.08625	0.000212132	0.0024595	0.0741	0.0739	0.074	0.000141421	0.0019111	0.077	0.077			0.077	0.00616715	0.0800929
20544	0.0703	0.0688	0.06955	0.00106066	0.0152503	0.0865	0.0855	0.086	0.000707107	0.00822217	0.086	0.0881	0.08705	0.00148492	0.0170583	0.0846	0.0855	0.08505	0.000636396	0.00748261	0.0746	0.0706	0.0726	0.00282843	0.0389591	0.08005				0.08005	0.0082939	0.103609
22468	0.0844	0.0795	0.08195	0.00346482	0.0422797	0.0869	0.0846	0.08575	0.00162635	0.0189661	0.0814	0.0832	0.0823	0.00127279	0.0154653	0.0832	0.0839	0.08355	0.000494975	0.00592429	0.0825	0.0825	0.0825	0	0	0.08321				0.08321	0.00154005	0.018508
22609	0.0731	0.0708	0.07195	0.00162635	0.0226038	0.0716	0.0722	0.0719	0.000424264	0.00590075	0.07	0.0695	0.06975	0.000353553	0.00506887	0.0886	0.0917	0.09015	0.00219203	0.0243154	0.0706	0.0715	0.07105	0.000636396	0.00895702	0.07496				0.07496	0.00853803	0.113901
22612	0.0747	0.0711	0.0729	0.00254558	0.0349189	0.084	0.0846	0.0843	0.000424264	0.00503279	0.0805	0.0807	0.0806	0.000141421	0.00175461	0.1326	0.1233	0.12795	0.00657609	0.0513958	0.0864	0.0834	0.0849	0.00212132	0.0249861	0.09013				0.09013	0.021676	0.240497
22613	0.0918	0.0836	0.0877	0.00579828	0.0661149	0.0681	0.0694	0.06875	0.000919239	0.0133707	0.08	0.0814	0.0807	0.000989949	0.012267	0.084	0.0837	0.08385	0.000212132	0.0025299	0.074	0.0743	0.07415	0.000212132	0.00286085	0.07903				0.07903	0.00759413	0.0960917
22614	0.0603	0.0592	0.05975	0.000777817	0.0130179	0.0954	0.0931	0.09425	0.00162635	0.0172557	0.0667	0.0678	0.06725	0.000777817	0.0115661	0.1179	0.1133	0.1156	0.00325269	0.0281375	0.1052	0.094	0.0996	0.0079196	0.079514	0.08729				0.08729	0.0232459	0.266307
27761	0.0858	0.0839	0.08485	0.0013435	0.0158339	0.1196	0.1188	0.1192	0.000565685	0.00474568	0.1176	0.1159	0.11675	0.00120208	0.0102962	0.1186	0.1218	0.1202	0.00226274	0.0188248	0.111	0.114	0.1125	0.00212132	0.0188562	0.1107				0.1107	0.0147527	0.133267
36684	0.0778	0.0776	0.0777	0.000141421	0.00182009	0.0928	0.0912	0.092	0.00113137	0.0122975	0.0889	0.0892	0.08905	0.000212132	0.00238217	0.099	0.1009	0.09995	0.0013435	0.0134417	0.0851	0.0858	0.08545	0.000494975	0.00579257	0.08883				0.08883	0.00820142	0.0923271
42824	0.0641	0.0625	0.0633	0.00113137	0.0178732	0.0815	0.0774	0.07945	0.00289914	0.0364901	0.0769	0.0787	0.0778	0.00127279	0.0163598	0.0784	0.0794	0.0789	0.000707107	0.00896206	0.0783	0.0768	0.07755	0.00106066	0.0136771	0.0754				0.0754	0.00680891	0.0903038
42825	0.0912	0.0941	0.09265	0.00205061	0.0221329	0.0931	0.094	0.09355	0.000636396	0.00680274	0.0965	0.0982	0.09735	0.00120208	0.012348	0.0927	0.0925	0.0926	0.000141421	0.00152723	0.0741	0.0753	0.0747	0.000848528	0.0113591	0.09017				0.09017	0.008865	0.0983143
45769	0.0961	0.096	0.09605	7.07107e-05	0.000736186	0.095	0.0949	0.09495	7.07107e-05	0.000744715	0.0928	0.0939	0.09335	0.000777817	0.00833227	0.1052	0.1034	0.1043	0.00127279	0.0122032	0.0847	0.0851	0.0849	0.000282843	0.00333148	0.09471				0.09471	0.00692653	0.073134
45779	0.0849	0.0748	0.07985	0.00714178	0.0894399	0.0752	0.0738	0.0745	0.000989949	0.0132879	0.0761	0.0711	0.0736	0.00353553	0.0480371	0.0835	0.0751	0.0793	0.0059397	0.0749016	0.0775	0.0808	0.07915	0.00233345	0.0294814	0.07728				0.07728	0.00297712	0.0385238
49607	0.0924	0.0915	0.09195	0.000636396	0.00692111	0.0921	0.0924	0.09225	0.000212132	0.00229953	0.0917	0.0923	0.092	0.000424264	0.00461157	0.1007	0.0992	0.09995	0.00106066	0.0106119	0.0871	0.0868	0.08695	0.000212132	0.0024397	0.09262				0.09262	0.00465961	0.0503089
52615	0.0883	0.0892	0.08875	0.000636396	0.00717066	0.0862	0.0865	0.08635	0.000212132	0.00245665	0.0863	0.0866	0.08645	0.000212132	0.00245381	0.0972	0.0982	0.0977	0.000707107	0.00723753	0.0922	0.0922	0.0922	0	0	0.09029				0.09029	0.00477486	0.0528836
65908	0.0693	0.0726	0.07095	0.00233345	0.0328887	0.0798	0.0785	0.07915	0.000919239	0.0116139	0.0795	0.0785	0.079	0.000707107	0.00895072	0.0788	0.08	0.0794	0.000848528	0.0106868	0.0774	0.0799	0.07865	0.00176777	0.0224764	0.07743				0.07743	0.0036326	0.0469146
139661	0.0625	0.0647	0.0636	0.00155563	0.0244597	0.0721	0.0726	0.07235	0.000353553	0.00488671	0.0786	0.0746	0.0766	0.00282843	0.0369246	0.0761	0.077	0.07655	0.000636396	0.00831347	0.0728	0.0716	0.0722	0.000848528	0.0117525	0.07226				0.07226	0.00529733	0.0733094
141485	0.0682	0.0675	0.06785	0.000494975	0.00729513	0.0766	0.0747	0.07565	0.0013435	0.0177595	0.0756	0.0761	0.07585	0.000353553	0.00466122	0.0787	0.0786	0.07865	7.07107e-05	0.000899055	0.0697	0.0691	0.0694	0.000424264	0.00611332	0.07348				0.07348	0.00462055	0.0628818
203066	0.0909	0.0881	0.0895	0.0019799	0.0221218	0.0988	0.1002	0.0995	0.000989949	0.00994924	0.1004	0.1015	0.10095	0.000777817	0.00770498	0.1015	0.107	0.10425	0.00388909	0.0373054	0.0903	0.0917	0.091	0.000989949	0.0108786	0.09704				0.09704	0.00645479	0.0665167
203309	0.0837	0.0854	0.08455	0.00120208	0.0142174	0.1159	0.0972	0.10655	0.0132229	0.1241	0.0921	0.0935	0.0928	0.000989949	0.0106676	0.0978	0.0945	0.09615	0.00233345	0.0242689	0.0912	0.0888	0.09	0.00169706	0.0188562	0.09401				0.09401	0.00819858	0.0872097
288185	0.0548	0.0533	0.05405	0.00106066	0.0196237	0.0648	0.0667	0.06575	0.0013435	0.0204335	0.0645	0.0657	0.0651	0.000848528	0.0130342	0.0645	0.0643	0.0644	0.000141421	0.00219598	0.0697	0.067	0.06835	0.00190919	0.0279325	0.06353				0.06353	0.00550575	0.0866637
288186	0.0635	0.068	0.06575	0.00318198	0.0483951	0.0696	0.0619	0.06575	0.00544472	0.0828095	0.0666	0.0606	0.0636	0.00424264	0.0667082	0.0665	0.0674	0.06695	0.000636396	0.00950554	0.0627	0.063	0.06285	0.000212132	0.00337521	0.06498				0.06498	0.00169617	0.026103
288187	0.0913	0.136	0.11365	0.0316077	0.278114	0.1014	0.0974	0.0994	0.00282843	0.028455	0.082	0.0685	0.07525	0.00954594	0.126856	0.1081	0.1064	0.10725	0.00120208	0.0112082	0.1038	0.1271	0.11545	0.0164756	0.142708	0.1022				0.1022	0.0163272	0.159757
288189	0.0924	0.0775	0.08495	0.0105359	0.124025	0.0701	0.0648	0.06745	0.00374767	0.0555621	0.0682	0.072	0.0701	0.00268701	0.038331	0.0638	0.0627	0.06325	0.000777817	0.0122975	0.0679	0.067	0.06745	0.000636396	0.00943508	0.07064				0.07064	0.00836708	0.118447
288199	0.0953	0.0819	0.0886	0.00947523	0.106944	0.0749	0.0734	0.07415	0.00106066	0.0143043	0.0733	0.0706	0.07195	0.00190919	0.0265349	0.0847	0.0747	0.0797	0.00707107	0.0887211	0.0709	0.0679	0.0694	0.00212132	0.0305666	0.07676				0.07676	0.0076313	0.0994177
288210	0.0629	0.0726	0.06775	0.00685894	0.101239	0.0761	0.0768	0.07645	0.000494975	0.00647449	0.0676	0.0709	0.06925	0.00233345	0.0336961	0.0671	0.0654	0.06625	0.00120208	0.0181446	0.0647	0.0653	0.065	0.000424264	0.00652714	0.06894				0.06894	0.00449088	0.0651419
324296	0.0649	0.0654	0.06515	0.000353553	0.00542676	0.0747	0.0758	0.07525	0.000777817	0.0103364	0.0728	0.0733	0.07305	0.000353553	0.00483988	0.0726	0.0711	0.07185	0.00106066	0.0147621	0.0686	0.068	0.0683	0.000424264	0.00621177	0.07072				0.07072	0.00400337	0.0566088
326308	0.0796	0.0815	0.08055	0.0013435	0.0166791	0.0938	0.093	0.0934	0.000565685	0.00605659	0.0913	0.093	0.09215	0.00120208	0.0130448	0.094	0.0946	0.0943	0.000424264	0.00449909	0.087	0.0828	0.0849	0.00296985	0.0349805	0.08906				0.08906	0.00603256	0.0677359
497193	0.0771	0.0821	0.0796	0.00353553	0.0444163	0.0761	0.0777	0.0769	0.00113137	0.0147122	0.0788	0.0834	0.0811	0.00325269	0.0401072	0.0834	0.0821	0.08275	0.000919239	0.0111086	0.0641	0.0643	0.0642	0.000141421	0.00220282	0.07691				0.07691	0.00742364	0.0965238
497202	0.0643	0.0531	0.0587	0.0079196	0.134916	0.0733	0.0696	0.07145	0.0026163	0.0366171	0.0665	0.0659	0.0662	0.000424264	0.00640882	0.087	0.0879	0.08745	0.000636396	0.00727726	0.0573	0.0586	0.05795	0.000919239	0.0158626	0.06835				0.06835	0.012045	0.176225
497203	0.0898	0.084	0.0869	0.00410122	0.0471947	0.08	0.0822	0.0811	0.00155563	0.0191817	0.087	0.0813	0.08415	0.00403051	0.0478967	0.095	0.0905	0.09275	0.00318198	0.0343071	0.0867	0.0828	0.08475	0.00275772	0.0325394	0.08593				0.08593	0.00434002	0.0505064
497237	0.0862	0.0854	0.0858	0.000565685	0.00659307	0.0851	0.0798	0.08245	0.00374767	0.0454538	0.0777	0.0776	0.07765	7.07107e-05	0.000910633	0.075	0.0744	0.0747	0.000424264	0.00567957	0.076	0.0708	0.0734	0.00367696	0.0500948	0.0788				0.0788	0.00523486	0.0664322
497243	0.0769	0.0786	0.07775	0.00120208	0.0154609	0.0708	0.0725	0.07165	0.00120208	0.0167771	0.0728	0.0726	0.0727	0.000141421	0.00194527	0.0756	0.0793	0.07745	0.0026163	0.0337804	0.0714	0.069	0.0702	0.00169706	0.0241746	0.07395				0.07395	0.00344982	0.0466507
497248	0.0757	0.073	0.07435	0.00190919	0.0256784	0.0789	0.0756	0.07725	0.00233345	0.0302065	0.0757	0.0759	0.0758	0.000141421	0.00186572	0.0856	0.0841	0.08485	0.00106066	0.0125004	0.0769	0.0759	0.0764	0.000707107	0.00925532	0.07773				0.07773	0.00411834	0.0529827
497251	0.0681	0.0684	0.06825	0.000212132	0.00310816	0.0745	0.0749	0.0747	0.000282843	0.00378638	0.0735	0.0738	0.07365	0.000212132	0.00288027	0.0808	0.0794	0.0801	0.000989949	0.0123589	0.0756	0.0753	0.07545	0.000212132	0.00281156	0.07443				0.07443	0.0042445	0.0570267
497252	0.0683	0.0703	0.0693	0.00141421	0.0204071	0.0717	0.0712	0.07145	0.000353553	0.00494826	0.0739	0.0735	0.0737	0.000282843	0.00383776	0.0768	0.0706	0.0737	0.00438406	0.0594852	0.0743	0.0732	0.07375	0.000777817	0.0105467	0.07238				0.07238	0.00198198	0.027383
497261	0.0755	0.0743	0.0749	0.000848528	0.0113288	0.0708	0.0715	0.07115	0.000494975	0.00695678	0.0694	0.0684	0.0689	0.000707107	0.0102628	0.0779	0.0762	0.07705	0.00120208	0.0156013	0.0738	0.0749	0.07435	0.000777817	0.0104616	0.07327				0.07327	0.00322889	0.0440684
497272	0.0837	0.0807	0.0822	0.00212132	0.0258068	0.0782	0.0781	0.07815	7.07107e-05	0.000904807	0.0793	0.0781	0.0787	0.000848528	0.0107818	0.0806	0.0834	0.082	0.0019799	0.0241451	0.0743	0.0766	0.07545	0.00162635	0.0215553	0.0793				0.0793	0.00283747	0.0357815
497276	0.0971	0.0937	0.0954	0.00240416	0.0252009	0.0862	0.0847	0.08545	0.00106066	0.0124126	0.0795	0.0822	0.08085	0.00190919	0.023614	0.0908	0.094	0.0924	0.00226274	0.0244885	0.0797	0.0733	0.0765	0.00452548	0.0591566	0.08612				0.08612	0.00784734	0.091121
497302	0.0828	0.0804	0.0816	0.00169706	0.0207973	0.079	0.0813	0.08015	0.00162635	0.0202913	0.0789	0.0777	0.0783	0.000848528	0.0108369	0.0816	0.0789	0.08025	0.00190919	0.0237905	0.0769	0.0771	0.077	0.000141421	0.00183664	0.07946				0.07946	0.00180811	0.0227549
519611	0.1886	0.2031	0.19585	0.010253	0.0523515	0.0776	0.0809	0.07925	0.00233345	0.0294442	0.0815	0.0929	0.0872	0.00806102	0.0924429	0.1071	0.0943	0.1007	0.00905097	0.0898805	0.0836	0.0882	0.0859	0.00325269	0.037866	0.10978				0.10978	0.0487409	0.443987
519622	0.0774	0.0792	0.0783	0.00127279	0.0162553	0.0815	0.0812	0.08135	0.000212132	0.00260765	0.0847	0.0797	0.0822	0.00353553	0.0430114	0.0777	0.08	0.07885	0.00162635	0.0206258	0.0741	0.0748	0.07445	0.000494975	0.00664842	0.07903				0.07903	0.00304027	0.0384698
575054	0.0881	0.0891	0.0886	0.000707107	0.00798089	0.1047	0.1069	0.1058	0.00155563	0.0147035	0.0949	0.0986	0.09675	0.0026163	0.0270418	0.0997	0.0993	0.0995	0.000282843	0.00284264	0.0949	0.0964	0.09565	0.00106066	0.011089	0.09726				0.09726	0.00624093	0.0641675
mn1	0.101	0.1031	0.10205	0.00148492	0.0145509	0.1503	0.151	0.15065	0.000494975	0.00328559	0.141	0.1405	0.14075	0.000353553	0.00251192	0.1763	0.1837	0.18	0.00523259	0.0290699	0.0925	0.0883	0.0904	0.00296985	0.0328523	0.13277				0.13277	0.036582	0.275529
mn2	0.0859	0.0853	0.0856	0.000424264	0.00495636	0.0902	0.0902	0.0902	0	0	0.0903	0.0909	0.0906	0.000424264	0.00468283	0.088	0.088	0.088	0	0	0.081	0.0826	0.0818	0.00113137	0.0138309	0.08724				0.08724	0.00363703	0.04169
mn3	0.1121	0.114	0.11305	0.0013435	0.0118841	0.0904	0.0887	0.08955	0.00120208	0.0134236	0.0819	0.0836	0.08275	0.00120208	0.0145267	0.0995	0.0997	0.0996	0.000141421	0.00141989	0.0791	0.079	0.07905	7.07107e-05	0.000894506	0.0928				0.0928	0.0137562	0.148235
mn8	0.1565	0.1552	0.15585	0.000919239	0.00589823	0.187	0.1904	0.1887	0.00240416	0.0127407	0.1737	0.1687	0.1712	0.00353553	0.0206515	0.1972	0.1946	0.1959	0.00183848	0.00938478	0.1364	0.1372	0.1368	0.000565685	0.00413513	0.16969				0.16969	0.0241035	0.142045
mn9	0.0729	0.0724	0.07265	0.000353553	0.00486653	0.0692	0.0717	0.07045	0.00176777	0.0250925	0.0723	0.0715	0.0719	0.000565685	0.00786767	0.0732	0.0727	0.07295	0.000353553	0.00484652	0.0534	0.0506	0.052	0.0019799	0.038075	0.06799				0.06799	0.00899079	0.132237
mn10	0.1254	0.1205	0.12295	0.00346482	0.0281808	0.1705	0.1715	0.171	0.000707107	0.00413513	0.1822	0.1833	0.18275	0.000777817	0.00425618	0.211	0.211	0.211	0	0	0.1762	0.172	0.1741	0.00296985	0.0170583	0.17236				0.17236	0.0318089	0.184549
mn14	0.1061	0.1004	0.10325	0.00403051	0.0390364	0.0928	0.0977	0.09525	0.00346482	0.0363761	0.0944	0.0903	0.09235	0.00289914	0.0313929	0.146	0.1132	0.1296	0.0231931	0.178959	0.0816	0.0758	0.0787	0.00410122	0.0521121	0.09983				0.09983	0.0188504	0.188825
mn15	0.1076	0.1055	0.10655	0.00148492	0.0139364	0.114	0.1144	0.1142	0.000282843	0.00247673	0.1072	0.1095	0.10835	0.00162635	0.0150101	0.1264	0.1247	0.12555	0.00120208	0.00957452	0.0939	0.0955	0.0947	0.00113137	0.0119469	0.10987				0.10987	0.0112702	0.102578
mn16	0.0896	0.0883	0.08895	0.000919239	0.0103343	0.0836	0.0834	0.0835	0.000141421	0.00169367	0.0798	0.0803	0.08005	0.000353553	0.00441666	0.0812	0.0819	0.08155	0.000494975	0.00606959	0.1549	0.1604	0.15765	0.00388909	0.0246691	0.09834				0.09834	0.033326	0.338886
mn22	0.0941	0.094	0.09405	7.07107e-05	0.000751841	0.0995	0.0958	0.09765	0.0026163	0.0267926	0.0974	0.0979	0.09765	0.000353553	0.00362062	0.1034	0.0914	0.0974	0.00848528	0.0871179	0.0857	0.0882	0.08695	0.00176777	0.0203308	0.09474				0.09474	0.00461443	0.0487063
mn24	0.1091	0.1142	0.11165	0.00360624	0.0322995	0.0996	0.1002	0.0999	0.000424264	0.00424689	0.103	0.1092	0.1061	0.00438406	0.0413201	0.1131	0.1251	0.1191	0.00848528	0.071245	0.0909	0.0931	0.092	0.00155563	0.0169091	0.10575				0.10575	0.0104456	0.0987761
mn2i	0.0852	0.085	0.0851	0.000141421	0.00166183	0.0884	0.0856	0.087	0.0019799	0.0227575	0.0826	0.082	0.0823	0.000424264	0.00515509	0.0833	0.0816	0.08245	0.00120208	0.0145795	0.0707	0.07	0.07035	0.000494975	0.00703589	0.08144				0.08144	0.0065011	0.0798268
MEAN			0.0859055	0.00291328	0.0327938			0.0887164	0.00150421	0.0175808			0.0865473	0.00157878	0.0189456			0.0953064	0.00237202	0.0236891			0.0833645	0.00177291	0.0201798					0.087968	0.00452427	0.0514308
STD			0.0233022					0.0233965					0.0224775					0.029148					0.0214918					0.271666				0.102003
CV			0.271254					0.263722					0.259714					0.305835					0.257805			MEAN	0.087968
																										STD	0.021136
																										CV	0.240269

## Sheet: Saturation
	Top view front		Mean +/-SD		CV	Right side		Mean +/-SD		CV	Left side		Mean +/-SD		CV	Front		Mean +/-SD		CV	Back		Mean +/-SD		CV
Indiv	image 1	image 2	mean	sd		Image 1	Image2	mean	sd		Image 1	Image2	mean	sd		Image 1	Image2	mean	sd		Image 1	Image2	mean	sd		MEAN				MEAN Views	STD Views	CV Views
17923	0.4492	0.4793	0.46425	0.0212839	0.0458458	0.4469	0.4493	0.4481	0.00169706	0.00378723	0.5018	0.5021	0.50195	0.000212132	0.000422616	0.3581	0.3669	0.3625	0.00622254	0.0171656	0.5528	0.5514	0.5521	0.000989949	0.00179306	0.46578	0.46578			0.46578	0.0702515	0.150825
20544	0.3712	0.3781	0.37465	0.00487904	0.0130229	0.3339	0.3351	0.3345	0.000848528	0.00253671	0.3763	0.3718	0.37405	0.00318198	0.00850683	0.4017	0.3968	0.39925	0.00346482	0.00867833	0.4284	0.4499	0.43915	0.0152028	0.0346187	0.38432				0.38432	0.0384391	0.100018
22468	0.5632	0.5586	0.5609	0.00325269	0.00579906	0.5176	0.5177	0.51765	7.07107e-05	0.000136599	0.4718	0.4715	0.47165	0.000212132	0.000449766	0.437	0.4412	0.4391	0.00296985	0.00676349	0.5414	0.5428	0.5421	0.000989949	0.00182614	0.50628				0.50628	0.0502695	0.0992919
22609	0.7023	0.6903	0.6963	0.00848528	0.0121862	0.5363	0.5491	0.5427	0.00905097	0.0166777	0.6108	0.6039	0.60735	0.00487904	0.00803332	0.3096	0.3052	0.3074	0.00311127	0.0101212	0.5775	0.584	0.58075	0.00459619	0.00791424	0.5469				0.5469	0.145343	0.265758
22612	0.3988	0.4079	0.40335	0.00643467	0.0159531	0.5806	0.5779	0.57925	0.00190919	0.00329597	0.5167	0.5191	0.5179	0.00169706	0.0032768	0.3633	0.3995	0.3814	0.0255973	0.067114	0.426	0.4193	0.42265	0.00473762	0.0112093	0.46091				0.46091	0.0841888	0.182658
22613	0.3585	0.3595	0.359	0.000707107	0.00196966	0.6087	0.6019	0.6053	0.00480833	0.00794371	0.6049	0.6107	0.6078	0.00410122	0.00674765	0.4605	0.4676	0.46405	0.00502046	0.0108188	0.6073	0.6031	0.6052	0.00296985	0.00490722	0.52827				0.52827	0.112864	0.213649
22614	0.689	0.6794	0.6842	0.00678823	0.0099214	0.3573	0.3572	0.35725	7.07107e-05	0.000197931	0.554	0.5592	0.5566	0.00367696	0.0066061	0.3108	0.3197	0.31525	0.00629325	0.0199627	0.2871	0.2978	0.29245	0.00756604	0.0258712	0.44115				0.44115	0.171321	0.388351
27761	0.3563	0.3847	0.3705	0.0200818	0.054202	0.5514	0.5486	0.55	0.0019799	0.00359982	0.5714	0.5686	0.57	0.0019799	0.00347351	0.4529	0.454	0.45345	0.000777817	0.00171533	0.4777	0.4758	0.47675	0.0013435	0.00281804	0.48414				0.48414	0.0800313	0.165306
36684	0.4683	0.4659	0.4671	0.00169706	0.00363318	0.5954	0.5966	0.596	0.000848528	0.0014237	0.6341	0.63	0.63205	0.00289914	0.00458688	0.5815	0.5726	0.57705	0.00629325	0.0109059	0.588	0.5946	0.5913	0.0046669	0.00789262	0.5727				0.5727	0.062413	0.10898
42824	0.5336	0.5481	0.54085	0.010253	0.0189573	0.4248	0.432	0.4284	0.00509117	0.0118841	0.4646	0.4659	0.46525	0.000919239	0.0019758	0.4727	0.4672	0.46995	0.00388909	0.00827553	0.3403	0.343	0.34165	0.00190919	0.00558814	0.44922				0.44922	0.0726077	0.161631
42825	0.7141	0.7065	0.7103	0.00537401	0.00756583	0.5823	0.5822	0.58225	7.07107e-05	0.000121444	0.6357	0.6334	0.63455	0.00162635	0.00256299	0.4657	0.466	0.46585	0.000212132	0.000455366	0.6012	0.6007	0.60095	0.000353553	0.000588324	0.59878				0.59878	0.0889727	0.14859
45769	0.7143	0.7145	0.7144	0.000141421	0.000197958	0.4893	0.4883	0.4888	0.000707107	0.00144662	0.5374	0.5397	0.53855	0.00162635	0.00301986	0.3339	0.3364	0.33515	0.00176777	0.00527455	0.5864	0.5823	0.58435	0.00289914	0.0049613	0.53225				0.53225	0.138446	0.260114
45779	0.391	0.4125	0.40175	0.0152028	0.0378414	0.4183	0.4121	0.4152	0.00438406	0.0105589	0.3937	0.3966	0.39515	0.00205061	0.00518945	0.3482	0.3572	0.3527	0.00636396	0.0180436	0.3392	0.342	0.3406	0.0019799	0.00581297	0.38108				0.38108	0.0325325	0.0853691
49607	0.696	0.6975	0.69675	0.00106066	0.0015223	0.6651	0.6672	0.66615	0.00148492	0.00222911	0.6485	0.6502	0.64935	0.00120208	0.00185121	0.5535	0.5585	0.556	0.00353553	0.00635887	0.6397	0.6396	0.63965	7.07107e-05	0.000110546	0.64158				0.64158	0.0525249	0.081868
52615	0.6997	0.6934	0.69655	0.00445477	0.00639548	0.5988	0.5986	0.5987	0.000141421	0.000236214	0.6393	0.6384	0.63885	0.000636396	0.000996159	0.4363	0.4398	0.43805	0.00247487	0.00564975	0.5911	0.5922	0.59165	0.000777817	0.00131466	0.59276				0.59276	0.0960057	0.161964
65908	0.5283	0.52	0.52415	0.00586899	0.0111972	0.4889	0.4945	0.4917	0.0039598	0.00805328	0.5399	0.536	0.53795	0.00275772	0.00512634	0.4671	0.4613	0.4642	0.00410122	0.00883503	0.4887	0.489	0.48885	0.000212132	0.000433941	0.50137				0.50137	0.0295334	0.0589055
139661	0.4871	0.4897	0.4884	0.00183848	0.00376429	0.5137	0.5145	0.5141	0.000565685	0.00110034	0.4664	0.4675	0.46695	0.000777817	0.00166574	0.432	0.4244	0.4282	0.00537401	0.0125502	0.4137	0.4131	0.4134	0.000424264	0.00102628	0.46221				0.46221	0.0416535	0.0901181
141485	0.466	0.47	0.468	0.00282843	0.00604365	0.4758	0.4769	0.47635	0.000777817	0.00163287	0.462	0.4596	0.4608	0.00169706	0.00368285	0.4003	0.399	0.39965	0.000919239	0.00230011	0.4595	0.4574	0.45845	0.00148492	0.00323901	0.45265				0.45265	0.03044	0.0672484
203066	0.4599	0.4664	0.46315	0.00459619	0.00992377	0.4628	0.4524	0.4576	0.00735391	0.0160706	0.462	0.4601	0.46105	0.0013435	0.00291401	0.4173	0.4158	0.41655	0.00106066	0.0025463	0.3934	0.4069	0.40015	0.00954594	0.0238559	0.4397				0.4397	0.0292671	0.0665616
203309	0.3896	0.4168	0.4032	0.0192333	0.0477016	0.3938	0.4085	0.40115	0.0103945	0.0259117	0.4282	0.4332	0.4307	0.00353553	0.00820881	0.3912	0.3914	0.3913	0.000141421	0.000361414	0.3608	0.3643	0.36255	0.00247487	0.0068263	0.39778				0.39778	0.0245337	0.0616765
288185	0.499	0.5098	0.5044	0.00763675	0.0151403	0.4625	0.4682	0.46535	0.00403051	0.00866124	0.4696	0.4714	0.4705	0.00127279	0.00270519	0.4308	0.4289	0.42985	0.0013435	0.00312552	0.4506	0.4446	0.4476	0.00424264	0.00947864	0.46354				0.46354	0.0278853	0.0601572
288186	0.3632	0.39	0.3766	0.0189505	0.0503199	0.3933	0.4059	0.3996	0.00890955	0.0222962	0.4262	0.4562	0.4412	0.0212132	0.0480807	0.3665	0.3584	0.36245	0.00572756	0.0158024	0.4911	0.4764	0.48375	0.0103945	0.0214873	0.41272				0.41272	0.0496494	0.120298
288187	0.3351	0.3189	0.327	0.0114551	0.035031	0.2913	0.2886	0.28995	0.00190919	0.00658454	0.3363	0.3394	0.33785	0.00219203	0.00648818	0.442	0.4317	0.43685	0.0072832	0.0166721	0.4333	0.4452	0.43925	0.00841457	0.0191567	0.36618				0.36618	0.0679745	0.185631
288189	0.3767	0.3921	0.3844	0.0108894	0.0283284	0.3501	0.3519	0.351	0.00127279	0.00362619	0.3853	0.3868	0.38605	0.00106066	0.00274747	0.3953	0.3993	0.3973	0.00282843	0.00711912	0.4218	0.4245	0.42315	0.00190919	0.00451185	0.38838				0.38838	0.0260147	0.0669825
288199	0.3997	0.4113	0.4055	0.00820244	0.020228	0.4236	0.4252	0.4244	0.00113137	0.00266581	0.4294	0.432	0.4307	0.00183848	0.00426858	0.3748	0.3726	0.3737	0.00155563	0.00416279	0.4198	0.4205	0.42015	0.000494975	0.00117809	0.41089				0.41089	0.0227643	0.0554024
288210	0.454	0.4238	0.4389	0.0213546	0.0486549	0.4403	0.4385	0.4394	0.00127279	0.00289666	0.479	0.4637	0.47135	0.0108187	0.0229527	0.4023	0.4058	0.40405	0.00247487	0.00612517	0.5185	0.5162	0.51735	0.00162635	0.00314361	0.45421				0.45421	0.042574	0.0937321
324296	0.4872	0.4876	0.4874	0.000282843	0.000580309	0.4776	0.4765	0.47705	0.000777817	0.00163047	0.4976	0.4992	0.4984	0.00113137	0.00227001	0.4713	0.4717	0.4715	0.000282843	0.000599878	0.5151	0.5228	0.51895	0.00544472	0.0104918	0.49066				0.49066	0.0188626	0.0384434
326308	0.4082	0.4246	0.4164	0.0115966	0.0278495	0.4243	0.4057	0.415	0.0131522	0.031692	0.4924	0.4922	0.4923	0.000141421	0.000287267	0.3896	0.3979	0.39375	0.00586899	0.0149054	0.4139	0.4189	0.4164	0.00353553	0.00849072	0.42677				0.42677	0.0378752	0.0887484
497193	0.343	0.328	0.3355	0.0106066	0.0316143	0.3466	0.3377	0.34215	0.00629325	0.0183932	0.3615	0.3559	0.3587	0.0039598	0.0110393	0.3382	0.3494	0.3438	0.0079196	0.0230355	0.4093	0.4172	0.41325	0.00558614	0.0135176	0.35868				0.35868	0.0316617	0.0882728
497202	0.456	0.4922	0.4741	0.0255973	0.0539913	0.4129	0.4369	0.4249	0.0169706	0.0399401	0.4601	0.4482	0.45415	0.00841457	0.0185282	0.383	0.3838	0.3834	0.000565685	0.00147544	0.4606	0.472	0.4663	0.00806102	0.0172872	0.44057				0.44057	0.0370293	0.0840486
497203	0.2924	0.3083	0.30035	0.011243	0.037433	0.284	0.2816	0.2828	0.00169706	0.00600091	0.267	0.2832	0.2751	0.0114551	0.0416399	0.2631	0.2603	0.2617	0.0019799	0.00756553	0.3611	0.353	0.35705	0.00572756	0.0160414	0.2954				0.2954	0.0371879	0.12589
497237	0.2797	0.2841	0.2819	0.00311127	0.0110368	0.2736	0.2716	0.2726	0.00141421	0.00518787	0.3253	0.3216	0.32345	0.0026163	0.00808872	0.3344	0.3265	0.33045	0.00558614	0.0169047	0.3349	0.3534	0.34415	0.0130815	0.038011	0.31051				0.31051	0.031434	0.101234
497243	0.3772	0.3927	0.38495	0.0109602	0.0284716	0.3959	0.3985	0.3972	0.00183848	0.00462859	0.4462	0.4448	0.4455	0.000989949	0.00222211	0.3875	0.3867	0.3871	0.000565685	0.00146134	0.3829	0.3871	0.385	0.00296985	0.00771389	0.39995				0.39995	0.0259615	0.0649118
497248	0.4042	0.4255	0.41485	0.0150614	0.0363056	0.3907	0.3882	0.38945	0.00176777	0.00453914	0.4052	0.4038	0.4045	0.000989949	0.00244734	0.3785	0.3819	0.3802	0.00240416	0.00632342	0.4293	0.4301	0.4297	0.000565685	0.00131647	0.40374				0.40374	0.0197248	0.0488551
497251	0.4138	0.4178	0.4158	0.00282843	0.00680237	0.4294	0.4281	0.42875	0.000919239	0.002144	0.4804	0.481	0.4807	0.000424264	0.000882596	0.4115	0.4102	0.41085	0.000919239	0.00223741	0.4997	0.5033	0.5015	0.00254558	0.00507594	0.44752				0.44752	0.0409814	0.0915745
497252	0.4274	0.4295	0.42845	0.00148492	0.00346581	0.4453	0.4468	0.44605	0.00106066	0.0023779	0.4889	0.4924	0.49065	0.00247487	0.00504407	0.4174	0.4184	0.4179	0.000707107	0.00169205	0.4374	0.4299	0.43365	0.0053033	0.0122294	0.44334				0.44334	0.0283213	0.0638816
497261	0.4369	0.4483	0.4426	0.00806102	0.0182129	0.4102	0.4155	0.41285	0.00374767	0.00907755	0.4274	0.4281	0.42775	0.000494975	0.00115716	0.3931	0.3737	0.3834	0.0137179	0.0357795	0.4683	0.4598	0.46405	0.00601041	0.0129521	0.42613				0.42613	0.0304714	0.0715073
497272	0.4421	0.4309	0.4365	0.0079196	0.0181434	0.4669	0.4606	0.46375	0.00445477	0.00960598	0.4833	0.4804	0.48185	0.00205061	0.0042557	0.4431	0.4405	0.4418	0.00183848	0.00416133	0.4568	0.4515	0.45415	0.00374767	0.00825204	0.45561				0.45561	0.0181165	0.0397633
497276	0.3026	0.3384	0.3205	0.0253144	0.0789842	0.3306	0.3191	0.32485	0.00813173	0.0250323	0.4116	0.4116	0.4116	0	0	0.3305	0.3232	0.32685	0.00516188	0.0157928	0.3218	0.3203	0.32105	0.00106066	0.00330372	0.34097				0.34097	0.0395716	0.116056
497302	0.4011	0.4342	0.41765	0.0234052	0.0560403	0.4399	0.4396	0.43975	0.000212132	0.000482392	0.456	0.4565	0.45625	0.000353553	0.000774912	0.3982	0.394	0.3961	0.00296985	0.00749772	0.3802	0.3803	0.38025	7.07107e-05	0.000185958	0.418				0.418	0.0309876	0.074133
519611	0.2975	0.3034	0.30045	0.00417193	0.0138856	0.2878	0.293	0.2904	0.00367696	0.0126617	0.2876	0.2831	0.28535	0.00318198	0.0111511	0.2863	0.2999	0.2931	0.00961665	0.0328101	0.268	0.2665	0.26725	0.00106066	0.00396879	0.28731				0.28731	0.0124697	0.0434017
519622	0.4441	0.449	0.44655	0.00346482	0.00775909	0.4491	0.4513	0.4502	0.00155563	0.00345543	0.4366	0.433	0.4348	0.00254558	0.00585461	0.4084	0.4163	0.41235	0.00558614	0.0135471	0.391	0.3949	0.39295	0.00275772	0.00701798	0.42737				0.42737	0.0242622	0.056771
575054	0.4251	0.4188	0.42195	0.00445477	0.0105576	0.418	0.4216	0.4198	0.00254558	0.0060638	0.4053	0.4035	0.4044	0.00127279	0.00314736	0.4173	0.4146	0.41595	0.00190919	0.00458995	0.4916	0.457	0.4743	0.0244659	0.0515832	0.42728				0.42728	0.0271436	0.0635265
mn1	0.4016	0.403	0.4023	0.000989949	0.00246072	0.1686	0.167	0.1678	0.00113137	0.00674238	0.2218	0.2172	0.2195	0.00325269	0.0148186	0.1487	0.1498	0.14925	0.000777817	0.00521151	0.2677	0.2774	0.27255	0.00685894	0.0251658	0.24228				0.24228	0.101542	0.419112
mn2	0.5246	0.5294	0.527	0.00339411	0.00644044	0.4587	0.4587	0.4587	0	0	0.4658	0.4635	0.46465	0.00162635	0.00350015	0.4698	0.4677	0.46875	0.00148492	0.00316784	0.5596	0.5567	0.55815	0.00205061	0.00367394	0.49545				0.49545	0.0445499	0.0899181
mn3	0.3115	0.3057	0.3086	0.00410122	0.0132898	0.4007	0.4066	0.40365	0.00417193	0.0103355	0.3908	0.3833	0.38705	0.0053033	0.0137018	0.295	0.291	0.293	0.00282843	0.00965333	0.3874	0.3818	0.3846	0.0039598	0.0102959	0.35538				0.35538	0.0506617	0.142556
mn8	0.2918	0.2693	0.28055	0.0159099	0.0567097	0.2391	0.2423	0.2407	0.00226274	0.00940067	0.2602	0.2702	0.2652	0.00707107	0.0266632	0.2076	0.2177	0.21265	0.00714178	0.0335847	0.3715	0.3689	0.3702	0.00183848	0.00496617	0.27386				0.27386	0.0596812	0.217926
mn9	0.6025	0.6065	0.6045	0.00282843	0.00467895	0.5153	0.5117	0.5135	0.00254558	0.00495732	0.5455	0.5518	0.54865	0.00445477	0.00811952	0.4878	0.4888	0.4883	0.000707107	0.0014481	0.6012	0.6007	0.60095	0.000353553	0.000588324	0.55118				0.55118	0.0517208	0.0938364
mn10	0.2609	0.2693	0.2651	0.0059397	0.0224055	0.1676	0.165	0.1663	0.00183848	0.0110552	0.1792	0.1737	0.17645	0.00388909	0.0220407	0.1425	0.1425	0.1425	0	0	0.1307	0.13	0.13035	0.000494975	0.00379727	0.17614				0.17614	0.0530075	0.30094
mn14	0.3976	0.4091	0.40335	0.00813173	0.0201605	0.3079	0.312	0.30995	0.00289914	0.00935357	0.3418	0.3504	0.3461	0.00608112	0.0175704	0.236	0.2531	0.24455	0.0120915	0.049444	0.3842	0.3969	0.39055	0.00898026	0.0229939	0.3389				0.3389	0.0644465	0.190164
mn15	0.424	0.4236	0.4238	0.000282843	0.000667397	0.3383	0.3369	0.3376	0.000989949	0.00293231	0.3397	0.339	0.33935	0.000494975	0.0014586	0.2186	0.2281	0.22335	0.00671751	0.0300762	0.4411	0.4434	0.44225	0.00162635	0.00367743	0.35327				0.35327	0.0869058	0.246004
mn16	0.4556	0.4571	0.45635	0.00106066	0.00232423	0.3621	0.3586	0.36035	0.00247487	0.00686797	0.3596	0.3572	0.3584	0.00169706	0.00473509	0.4279	0.4227	0.4253	0.00367696	0.00864556	0.2082	0.2052	0.2067	0.00212132	0.0102628	0.36142				0.36142	0.0962301	0.266256
mn22	0.6233	0.6225	0.6229	0.000565685	0.000908148	0.5124	0.515	0.5137	0.00183848	0.00357889	0.4918	0.498	0.4949	0.00438406	0.00885848	0.5054	0.5421	0.52375	0.0259508	0.0495481	0.5295	0.5236	0.52655	0.00417193	0.00792314	0.53636				0.53636	0.049942	0.0931129
mn24	0.6634	0.6719	0.66765	0.00601041	0.00900233	0.6006	0.6037	0.60215	0.00219203	0.00364034	0.5766	0.5625	0.56955	0.00997021	0.0175054	0.4857	0.4591	0.4724	0.018809	0.0398159	0.6545	0.6492	0.65185	0.00374767	0.00574928	0.59272				0.59272	0.0778035	0.131265
mn2i	0.6393	0.635	0.63715	0.00304056	0.00477212	0.4862	0.4921	0.48915	0.00417193	0.00852894	0.5691	0.5696	0.56935	0.000353553	0.000620977	0.5994	0.6018	0.6006	0.00169706	0.0028256	0.5367	0.5376	0.53715	0.000636396	0.00118476	0.56668				0.56668	0.0570233	0.100627
MEAN			0.459085	0.00808673	0.0199327			0.430217	0.0031177	0.0077433			0.453105	0.0030997	0.00772587			0.391197	0.00473247	0.0127401			0.446323	0.00402022	0.00962331					0.435985	0.0272616	0.0625288
STD			0.121795					0.107727					0.10567					0.0924972					0.108558					0.245718				0.127078
CV			0.265299					0.250402					0.233214					0.236446					0.243228			MEAN	0.435985
																										STD	0.0943072
																										CV	0.216308

## Sheet: Value
	Top view front		Mean +/-SD		CV	Right side		Mean +/-SD		CV	Left side		Mean +/-SD		CV	Front		Mean +/-SD		CV	Back		Mean +/-SD		CV
Indiv	image 1	image 2	mean	sd		Image 1	Image2	mean	sd		Image 1	Image2	mean	sd		Image 1	Image2	mean	sd		Image 1	Image2	mean	sd		MEAN				MEAN Views	STD Views	CV Views
17923	0.347	0.3375	0.34225	0.00671751	0.0196275	0.3493	0.3671	0.3582	0.0125865	0.0351382	0.3237	0.3263	0.325	0.00183848	0.00565685	0.4801	0.6262	0.55315	0.103308	0.186764	0.3361	0.3163	0.3262	0.0140007	0.0429206	0.38096	0.38096			0.38096	0.097206	0.255161
20544	0.1903	0.1858	0.18805	0.00318198	0.0169209	0.3533	0.3567	0.355	0.00240416	0.00677229	0.3968	0.3892	0.393	0.00537401	0.0136743	0.3808	0.3694	0.3751	0.00806102	0.0214903	0.3249	0.3074	0.31615	0.0123744	0.0391408	0.32546				0.32546	0.0819551	0.251813
22468	0.4041	0.4212	0.41265	0.0120915	0.0293021	0.4057	0.4185	0.4121	0.00905097	0.021963	0.4913	0.4692	0.48025	0.0156271	0.0325394	0.579	0.6125	0.59575	0.0236881	0.0397618	0.4625	0.465	0.46375	0.00176777	0.0038119	0.4729				0.4729	0.0750942	0.158795
22609	0.2005	0.2048	0.20265	0.00304056	0.015004	0.2723	0.2712	0.27175	0.000777817	0.00286225	0.2596	0.2629	0.26125	0.00233345	0.00893188	0.5672	0.5704	0.5688	0.00226274	0.0039781	0.2621	0.268	0.26505	0.00417193	0.0157402	0.3139				0.3139	0.14516	0.46244
22612	0.221	0.2322	0.2266	0.0079196	0.0349497	0.4859	0.4776	0.48175	0.00586899	0.0121826	0.4842	0.4774	0.4808	0.00480833	0.0100007	0.8458	0.8473	0.84655	0.00106066	0.00125292	0.4642	0.4473	0.45575	0.0119501	0.0262207	0.49829				0.49829	0.222199	0.445923
22613	0.194	0.1878	0.1909	0.00438406	0.0229652	0.331	0.3271	0.32905	0.00275772	0.00838084	0.304	0.3134	0.3087	0.0066468	0.0215316	0.6272	0.6305	0.62885	0.00233345	0.00371067	0.3552	0.3596	0.3574	0.00311127	0.00870529	0.36298				0.36298	0.161576	0.445137
22614	0.2258	0.2206	0.2232	0.00367696	0.0164738	0.4741	0.4581	0.4661	0.0113137	0.0242731	0.3291	0.3205	0.3248	0.00608112	0.0187227	0.5912	0.5928	0.592	0.00113137	0.0019111	0.3265	0.3155	0.321	0.00777817	0.0242311	0.38542				0.38542	0.14433	0.374475
27761	0.1924	0.2152	0.2038	0.016122	0.0791071	0.5928	0.5924	0.5926	0.000282843	0.000477291	0.5903	0.5963	0.5933	0.00424264	0.00715092	0.7808	0.7918	0.7863	0.00777817	0.00989212	0.4702	0.4826	0.4764	0.00876812	0.018405	0.53048				0.53048	0.21383	0.403088
36684	0.2475	0.2481	0.2478	0.000424264	0.00171212	0.4455	0.4235	0.4345	0.0155563	0.0358029	0.416	0.4477	0.43185	0.0224153	0.0519053	0.6643	0.546	0.60515	0.0836507	0.138231	0.4057	0.3839	0.3948	0.0154149	0.0390449	0.42282				0.42282	0.127357	0.301209
42824	0.1655	0.1488	0.15715	0.0118087	0.0751428	0.3191	0.325	0.32205	0.00417193	0.0129543	0.2819	0.2772	0.27955	0.0033234	0.0118884	0.3193	0.3263	0.3228	0.00494975	0.0153338	0.3295	0.3259	0.3277	0.00254558	0.00776803	0.28185				0.28185	0.0723715	0.256773
42825	0.4419	0.4215	0.4317	0.014425	0.0334144	0.4324	0.4363	0.43435	0.00275772	0.00634907	0.5717	0.6463	0.609	0.0527502	0.0866177	0.6716	0.6667	0.66915	0.00346482	0.00517795	0.199	0.1998	0.1994	0.000565685	0.00283694	0.46872				0.46872	0.183668	0.39185
45769	0.2303	0.2319	0.2311	0.00113137	0.00489559	0.4711	0.4694	0.47025	0.00120208	0.00255626	0.3697	0.3709	0.3703	0.000848528	0.00229146	0.6542	0.6499	0.65205	0.00304056	0.00466308	0.2649	0.2671	0.266	0.00155563	0.00584825	0.39794				0.39794	0.170153	0.427585
45779	0.1951	0.2215	0.2083	0.0186676	0.0896189	0.3664	0.3585	0.36245	0.00558614	0.0154122	0.3118	0.3065	0.30915	0.00374767	0.0121225	0.2822	0.3041	0.29315	0.0154856	0.052825	0.3818	0.3898	0.3858	0.00565685	0.0146627	0.31177				0.31177	0.0691168	0.221692
49607	0.3424	0.3337	0.33805	0.00615183	0.018198	0.4704	0.4809	0.47565	0.00742462	0.0156094	0.3726	0.3842	0.3784	0.00820244	0.0216766	0.5312	0.5202	0.5257	0.00777817	0.0147958	0.4019	0.4122	0.40705	0.0072832	0.0178926	0.42497				0.42497	0.075432	0.1775
52615	0.1984	0.1918	0.1951	0.0046669	0.0239206	0.3192	0.3181	0.31865	0.000777817	0.00244098	0.3245	0.318	0.32125	0.00459619	0.0143072	0.4818	0.481	0.4814	0.000565685	0.00117508	0.4718	0.4687	0.47025	0.00219203	0.00466142	0.35733				0.35733	0.119646	0.334834
65908	0.2574	0.2482	0.2528	0.00650538	0.0257333	0.3494	0.3412	0.3453	0.00579828	0.016792	0.4579	0.4597	0.4588	0.00127279	0.00277418	0.4782	0.4811	0.47965	0.00205061	0.00427522	0.4055	0.3985	0.402	0.00494975	0.0123128	0.38771				0.38771	0.0918018	0.23678
139661	0.2971	0.3072	0.30215	0.00714178	0.0236365	0.3175	0.3191	0.3183	0.00113137	0.00355442	0.3995	0.3996	0.39955	7.07107e-05	0.000176976	0.5365	0.4989	0.5177	0.0265872	0.0513564	0.352	0.3633	0.35765	0.00799031	0.0223411	0.37907				0.37907	0.0861774	0.227339
141485	0.2921	0.3119	0.302	0.0140007	0.04636	0.3574	0.354	0.3557	0.00240416	0.00675896	0.3563	0.3625	0.3594	0.00438406	0.0121983	0.4789	0.4696	0.47425	0.00657609	0.0138663	0.2889	0.2945	0.2917	0.0039598	0.0135749	0.35661				0.35661	0.0725316	0.203392
203066	0.4192	0.4348	0.427	0.0110309	0.0258334	0.5091	0.5004	0.50475	0.00615183	0.0121879	0.5532	0.5586	0.5559	0.00381838	0.00686882	0.5691	0.553	0.56105	0.0113844	0.0202913	0.3212	0.3902	0.3557	0.0487904	0.137167	0.48088				0.48088	0.0883149	0.183653
203309	0.2292	0.2443	0.23675	0.0106773	0.0450995	0.5027	0.5439	0.5233	0.0291328	0.0556713	0.4286	0.4362	0.4324	0.00537401	0.0124283	0.5185	0.5182	0.51835	0.000212132	0.000409245	0.3307	0.328	0.32935	0.00190919	0.00579684	0.40803				0.40803	0.124076	0.304084
288185	0.1969	0.2101	0.2035	0.00933381	0.0458664	0.2902	0.3303	0.31025	0.028355	0.091394	0.3213	0.3597	0.3405	0.0271529	0.0797442	0.2536	0.2434	0.2485	0.00721249	0.0290241	0.3754	0.3249	0.35015	0.0357089	0.101982	0.29058				0.29058	0.0628115	0.216159
288186	0.1549	0.1802	0.16755	0.0178898	0.106773	0.2345	0.2365	0.2355	0.00141421	0.00600515	0.2239	0.2178	0.22085	0.00431335	0.0195307	0.26	0.2392	0.2496	0.0147078	0.0589256	0.2603	0.2656	0.26295	0.00374767	0.0142524	0.22729				0.22729	0.0369023	0.162358
288187	0.1467	0.1447	0.1457	0.00141421	0.00970634	0.2117	0.2179	0.2148	0.00438406	0.02041	0.2929	0.3045	0.2987	0.00820244	0.0274605	0.2222	0.2509	0.23655	0.020294	0.0857914	0.1527	0.1488	0.15075	0.00275772	0.0182933	0.2093				0.2093	0.0637147	0.304418
288189	0.1673	0.18	0.17365	0.00898026	0.0517147	0.2551	0.3074	0.28125	0.0369817	0.13149	0.365	0.3764	0.3707	0.00806102	0.0217454	0.21	0.2259	0.21795	0.011243	0.0515852	0.3236	0.333	0.3283	0.0066468	0.0202461	0.27437				0.27437	0.0799421	0.291366
288199	0.1774	0.164	0.1707	0.00947523	0.0555081	0.3298	0.3082	0.319	0.0152735	0.0478793	0.3129	0.3171	0.315	0.00296985	0.00942809	0.2955	0.3266	0.31105	0.021991	0.0706993	0.2836	0.2829	0.28325	0.000494975	0.00174748	0.2798				0.2798	0.0625839	0.223674
288210	0.1588	0.1429	0.15085	0.011243	0.074531	0.3283	0.3236	0.32595	0.0033234	0.010196	0.3756	0.3731	0.37435	0.00176777	0.00472223	0.2792	0.2883	0.28375	0.00643467	0.0226773	0.3056	0.2994	0.3025	0.00438406	0.0144928	0.28748				0.28748	0.0835668	0.290687
324296	0.2322	0.2186	0.2254	0.00961665	0.0426648	0.3096	0.3008	0.3052	0.00622254	0.0203884	0.3756	0.3801	0.37785	0.00318198	0.00842128	0.3309	0.3539	0.3424	0.0162635	0.0474984	0.4135	0.4138	0.41365	0.000212132	0.00051283	0.3329				0.3329	0.072379	0.21742
326308	0.2802	0.2986	0.2894	0.0130108	0.0449577	0.3884	0.4053	0.39685	0.0119501	0.0301124	0.4607	0.4585	0.4596	0.00155563	0.00338476	0.3776	0.433	0.4053	0.0391737	0.0966536	0.3692	0.3704	0.3698	0.000848528	0.00229456	0.38419				0.38419	0.062219	0.161948
497193	0.2439	0.2091	0.2265	0.0246073	0.108642	0.3889	0.3427	0.3658	0.0326683	0.0893065	0.395	0.3664	0.3807	0.0202233	0.0531212	0.3274	0.378	0.3527	0.0357796	0.101445	0.2204	0.2382	0.2293	0.0125865	0.054891	0.311				0.311	0.0765101	0.246013
497202	0.1975	0.1905	0.194	0.00494975	0.0255142	0.3029	0.3095	0.3062	0.0046669	0.0152414	0.263	0.256	0.2595	0.00494975	0.0190742	0.3838	0.4394	0.4116	0.0393151	0.0955178	0.2474	0.2893	0.26835	0.0296278	0.110407	0.28793				0.28793	0.0800665	0.278076
497203	0.1735	0.1807	0.1771	0.00509117	0.0287474	0.316	0.3147	0.31535	0.000919239	0.00291498	0.2386	0.2492	0.2439	0.00749533	0.0307312	0.2564	0.2472	0.2518	0.00650538	0.0258355	0.1897	0.1889	0.1893	0.000565685	0.0029883	0.23549				0.23549	0.0553563	0.235069
497237	0.184	0.1793	0.18165	0.0033234	0.0182956	0.3043	0.3232	0.31375	0.0133643	0.0425954	0.4121	0.4032	0.40765	0.00629325	0.0154379	0.2775	0.2531	0.2653	0.0172534	0.0650336	0.2203	0.2313	0.2258	0.00777817	0.0344472	0.27883				0.27883	0.0869672	0.311901
497243	0.1895	0.1997	0.1946	0.00721249	0.0370632	0.2787	0.2813	0.28	0.00183848	0.00656599	0.2916	0.2892	0.2904	0.00169706	0.00584386	0.3434	0.3466	0.345	0.00226274	0.00655867	0.2152	0.2189	0.21705	0.0026163	0.0120539	0.26541				0.26541	0.0602592	0.227042
497248	0.1976	0.2416	0.2196	0.0311127	0.141679	0.2692	0.2722	0.2707	0.00212132	0.00783643	0.3111	0.3107	0.3109	0.000282843	0.000909755	0.3143	0.3282	0.32125	0.00982878	0.0305954	0.3139	0.3198	0.31685	0.00417193	0.0131669	0.28786				0.28786	0.0431279	0.149822
497251	0.2752	0.2551	0.26515	0.0142128	0.053603	0.4168	0.418	0.4174	0.000848528	0.00203289	0.4244	0.4117	0.41805	0.00898026	0.0214813	0.4427	0.4537	0.4482	0.00777817	0.0173542	0.428	0.4507	0.43935	0.0160513	0.0365343	0.39763				0.39763	0.0752607	0.189273
497252	0.2265	0.2266	0.22655	7.07107e-05	0.00031212	0.3709	0.3843	0.3776	0.00947523	0.0250933	0.4111	0.4116	0.41135	0.000353553	0.000859495	0.3664	0.4428	0.4046	0.054023	0.133522	0.3356	0.3347	0.33515	0.000636396	0.00189884	0.35105				0.35105	0.0757655	0.215825
497261	0.2353	0.2472	0.24125	0.00841457	0.034879	0.2845	0.3035	0.294	0.013435	0.0456974	0.3596	0.3634	0.3615	0.00268701	0.00743293	0.3572	0.3677	0.36245	0.00742462	0.0204845	0.2729	0.2513	0.2621	0.0152735	0.0582736	0.30426				0.30426	0.0559363	0.183844
497272	0.2318	0.2127	0.22225	0.0135057	0.0607682	0.4186	0.3754	0.397	0.030547	0.0769446	0.3913	0.384	0.38765	0.00516188	0.0133158	0.439	0.4057	0.42235	0.0235467	0.0557515	0.3247	0.3144	0.31955	0.0072832	0.0227921	0.34976				0.34976	0.0807899	0.230987
497276	0.1863	0.2226	0.20445	0.025668	0.125546	0.3617	0.3717	0.3667	0.00707107	0.019283	0.2966	0.2971	0.29685	0.000353553	0.00119102	0.3615	0.3501	0.3558	0.00806102	0.022656	0.2999	0.2745	0.2872	0.0179605	0.0625366	0.3022				0.3022	0.0648882	0.214719
497302	0.2615	0.3644	0.31295	0.0727613	0.232501	0.5524	0.5539	0.55315	0.00106066	0.00191749	0.5076	0.5306	0.5191	0.0162635	0.0313301	0.4781	0.4531	0.4656	0.0176777	0.0379675	0.5129	0.5038	0.50835	0.00643467	0.012658	0.47183				0.47183	0.0941578	0.199559
519611	0.1558	0.1527	0.15425	0.00219203	0.0142109	0.3863	0.3979	0.3921	0.00820244	0.0209193	0.2819	0.2904	0.28615	0.00601041	0.0210044	0.3157	0.3409	0.3283	0.0178191	0.0542769	0.2807	0.2858	0.28325	0.00360624	0.0127317	0.28881				0.28881	0.0871388	0.301717
519622	0.2553	0.2726	0.26395	0.0122329	0.0463457	0.3275	0.3336	0.33055	0.00431335	0.013049	0.3651	0.3515	0.3583	0.00961665	0.0268397	0.2876	0.343	0.3153	0.0391737	0.124243	0.2362	0.2364	0.2363	0.000141421	0.000598482	0.30088				0.30088	0.0497989	0.165511
575054	0.2953	0.2908	0.29305	0.00318198	0.0108581	0.4847	0.504	0.49435	0.0136472	0.0276063	0.3419	0.3657	0.3538	0.0168291	0.0475668	0.475	0.4545	0.46475	0.0144957	0.0311903	0.6668	0.5715	0.61915	0.0673873	0.108838	0.44502				0.44502	0.127043	0.285478
mn1	0.2139	0.2001	0.207	0.00975807	0.0471405	0.0686	0.0716	0.0701	0.00212132	0.0302613	0.1082	0.1269	0.11755	0.0132229	0.112487	0.2015	0.2104	0.20595	0.00629325	0.0305572	0.0619	0.0569	0.0594	0.00353553	0.0595208	0.132				0.132	0.0714226	0.541081
mn2	0.5901	0.5896	0.58985	0.000353553	0.000599395	0.3007	0.3007	0.3007	0	0	0.2173	0.2174	0.21735	7.07107e-05	0.000325331	0.4329	0.4422	0.43755	0.00657609	0.0150294	0.15	0.1518	0.1509	0.00127279	0.00843467	0.33927				0.33927	0.17627	0.519557
mn3	0.1512	0.1519	0.15155	0.000494975	0.00326608	0.2658	0.3064	0.2861	0.0287085	0.100344	0.2198	0.2026	0.2112	0.0121622	0.0575863	0.4419	0.4348	0.43835	0.00502046	0.0114531	0.0902	0.1038	0.097	0.00961665	0.0991407	0.23684				0.23684	0.132778	0.560623
mn8	0.3858	0.7001	0.54295	0.222244	0.409326	0.3137	0.3346	0.32415	0.0147785	0.0455916	0.2123	0.2155	0.2139	0.00226274	0.0105785	0.5447	0.4324	0.48855	0.0794081	0.162538	0.1828	0.1896	0.1862	0.00480833	0.0258234	0.35115				0.35115	0.160032	0.455737
mn9	0.609	0.6151	0.61205	0.00431335	0.00704738	0.3394	0.2828	0.3111	0.0400222	0.128648	0.2749	0.3017	0.2883	0.0189505	0.0657317	0.5104	0.5337	0.52205	0.0164756	0.0315594	0.1204	0.1359	0.12815	0.0109602	0.085526	0.37233				0.37233	0.193853	0.520648
mn10	0.3582	0.3655	0.36185	0.00516188	0.0142652	0.054	0.0535	0.05375	0.000353553	0.00657774	0.0861	0.0873	0.0867	0.000848528	0.00978695	0.1484	0.1487	0.14855	0.000212132	0.00142802	0.045	0.0592	0.0521	0.0100409	0.192724	0.14059				0.14059	0.129707	0.922587
mn14	0.3212	0.1622	0.2417	0.11243	0.465163	0.3303	0.3581	0.3442	0.0196576	0.0571109	0.3362	0.3562	0.3462	0.0141421	0.0408496	0.5577	0.4923	0.525	0.0462448	0.0880853	0.2568	0.272	0.2644	0.010748	0.0406506	0.3443				0.3443	0.111318	0.323317
mn15	0.2003	0.2032	0.20175	0.00205061	0.0101641	0.1451	0.1499	0.1475	0.00339411	0.0230109	0.1774	0.1753	0.17635	0.00148492	0.00842032	0.2193	0.2038	0.21155	0.0109602	0.0518088	0.1358	0.1412	0.1385	0.00381838	0.0275695	0.17513				0.17513	0.032178	0.183738
mn16	0.4764	0.448	0.4622	0.0200818	0.0434484	0.4061	0.4165	0.4113	0.00735391	0.0178797	0.5257	0.5237	0.5247	0.00141421	0.00269528	0.4513	0.4465	0.4489	0.00339411	0.00756095	0.3012	0.2978	0.2995	0.00240416	0.00802726	0.42932				0.42932	0.0832763	0.193973
mn22	0.4975	0.5079	0.5027	0.00735391	0.0146288	0.4306	0.485	0.4578	0.0384666	0.0840249	0.4801	0.4629	0.4715	0.0121622	0.0257948	0.4091	0.385	0.39705	0.0170413	0.0429197	0.4886	0.482	0.4853	0.0046669	0.00961654	0.46287				0.46287	0.0403794	0.087237
mn24	0.5718	0.5462	0.559	0.0181019	0.0323827	0.3828	0.3976	0.3902	0.0104652	0.02682	0.3537	0.3284	0.34105	0.0178898	0.0524551	0.4163	0.4121	0.4142	0.00296985	0.00717008	0.206	0.2159	0.21095	0.00700036	0.0331849	0.38308				0.38308	0.125859	0.328546
mn2i	0.4905	0.4933	0.4919	0.0019799	0.004025	0.6006	0.6115	0.60605	0.00770746	0.0127175	0.6239	0.6271	0.6255	0.00226274	0.00361749	0.4577	0.4665	0.4621	0.00622254	0.0134658	0.5652	0.5632	0.5642	0.00141421	0.00250658	0.54995				0.54995	0.0709674	0.129043
MEAN			0.275428	0.0159562	0.0558193			0.358149	0.0100409	0.0288365			0.358842	0.00761875	0.0220794			0.428305	0.0173537	0.0425459			0.309165	0.00879898	0.0322626					0.345978	0.0579307	0.16744
STD			0.122174					0.10809					0.113073					0.146643					0.120413					0.358469				0.29107
CV			0.44358					0.301802					0.315106					0.34238					0.389477			MEAN	0.345978
																										STD	0.0913387
																										CV	0.264001

## Sheet: Symmetry 
	Top view front		Mean +/-SD		CV	Right side		Mean +/-SD		CV	Left side		Mean +/-SD		CV	Front		Mean +/-SD		CV	Back		Mean +/-SD		CV
Indiv	image 1	image 2	mean	sd		Image 1	Image2	mean	sd		Image 1	Image2	mean	sd		Image 1	Image2	mean	sd		Image 1	Image2	mean	sd		MEAN				MEAN Views	STD Views	CV Views
17923	0.9147	0.9224	0.91855	0.00544472	0.00592752	0.4824	0.4893	0.48585	0.00487904	0.0100423	0.5606	0.5409	0.55075	0.01393	0.0252928	0.7311	0.7558	0.74345	0.0174655	0.0234926	0.8892	0.8879	0.88855	0.000919239	0.00103454	0.71743	0.71743			0.71743	0.19482	0.271553
20544	0.7077	0.7039	0.7058	0.00268701	0.00380704	0.4424	0.4335	0.43795	0.00629325	0.0143698	0.4948	0.493	0.4939	0.00127279	0.00257702	0.5547	0.5408	0.54775	0.00982878	0.0179439	0.6316	0.5987	0.61515	0.0232638	0.0378181	0.56011				0.56011	0.10454	0.186642
22468	0.947	0.9429	0.94495	0.00289914	0.00306803	0.6054	0.6011	0.60325	0.00304056	0.0050403	0.591	0.5746	0.5828	0.0115966	0.019898	0.8136	0.8043	0.80895	0.00657609	0.00812917	0.8949	0.8885	0.8917	0.00452548	0.00507512	0.76633				0.76633	0.165618	0.216119
22609	0.6286	0.6219	0.62525	0.00473762	0.00757715	0.5508	0.5354	0.5431	0.0108894	0.0200505	0.5648	0.5749	0.56985	0.00714178	0.0125327	0.4303	0.4578	0.44405	0.0194454	0.0437911	0.5135	0.5149	0.5142	0.000989949	0.00192522	0.53929				0.53929	0.0671523	0.12452
22612	0.6084	0.6111	0.60975	0.00190919	0.0031311	0.4543	0.4636	0.45895	0.00657609	0.0143286	0.5425	0.5258	0.53415	0.0118087	0.0221074	0.3693	0.4655	0.4174	0.0680237	0.16297	0.6176	0.5589	0.58825	0.0415072	0.0705604	0.5217				0.5217	0.0823905	0.157927
22613	0.5566	0.5569	0.55675	0.000212132	0.000381018	0.4586	0.467	0.4628	0.0059397	0.0128343	0.5003	0.5143	0.5073	0.00989949	0.0195141	0.8822	0.8987	0.89045	0.0116673	0.0131027	0.8402	0.8425	0.84135	0.00162635	0.00193302	0.65173				0.65173	0.199072	0.305452
22614	0.7627	0.7582	0.76045	0.00318198	0.00418434	0.5049	0.4871	0.496	0.0125865	0.025376	0.5517	0.5382	0.54495	0.00954594	0.0175171	0.4167	0.4727	0.4447	0.039598	0.0890443	0.7337	0.7106	0.72215	0.0163342	0.0226188	0.59365				0.59365	0.140025	0.235871
27761	0.6552	0.6751	0.66515	0.0140714	0.0211553	0.5341	0.5364	0.53525	0.00162635	0.00303848	0.4557	0.456	0.45585	0.000212132	0.000465355	0.5694	0.5849	0.57715	0.0109602	0.0189901	0.649	0.6616	0.6553	0.00890955	0.0135961	0.57774				0.57774	0.0870617	0.150694
36684	0.7607	0.7809	0.7708	0.0142836	0.0185308	0.6032	0.6043	0.60375	0.000777817	0.00128831	0.5915	0.5995	0.5955	0.00565685	0.00949934	0.716	0.7141	0.71505	0.0013435	0.00187889	0.883	0.8655	0.87425	0.0123744	0.0141543	0.71187				0.71187	0.117348	0.164844
42824	0.7959	0.7898	0.79285	0.00431335	0.00544031	0.5736	0.5665	0.57005	0.00502046	0.00880705	0.551	0.5493	0.55015	0.00120208	0.00218501	0.6864	0.6944	0.6904	0.00565685	0.00819359	0.611	0.6171	0.61405	0.00431335	0.00702443	0.6435				0.6435	0.0993497	0.15439
42825	0.7518	0.769	0.7604	0.0121622	0.0159945	0.5839	0.5899	0.5869	0.00424264	0.0072289	0.5996	0.61	0.6048	0.00735391	0.0121592	0.8222	0.8232	0.8227	0.000707107	0.000859495	0.8582	0.8418	0.85	0.0115966	0.013643	0.72496				0.72496	0.122416	0.16886
45769	0.728	0.7316	0.7298	0.00254558	0.00348806	0.5035	0.5094	0.50645	0.00417193	0.0082376	0.453	0.4451	0.44905	0.00558614	0.0124399	0.673	0.6603	0.66665	0.00898026	0.0134707	0.8834	0.8928	0.8881	0.0066468	0.0074843	0.64801				0.64801	0.176284	0.272039
45779	0.7359	0.837	0.78645	0.0714885	0.0909002	0.5154	0.5155	0.51545	7.07107e-05	0.000137182	0.4925	0.5311	0.5118	0.0272943	0.0533301	0.4614	0.4683	0.46485	0.00487904	0.0104959	0.807	0.796	0.8015	0.00777817	0.00970452	0.61601				0.61601	0.163766	0.26585
49607	0.8257	0.7882	0.80695	0.0265165	0.0328602	0.613	0.6116	0.6123	0.000989949	0.00161677	0.5805	0.5778	0.57915	0.00190919	0.00329654	0.8225	0.813	0.81775	0.00671751	0.00821463	0.7558	0.7395	0.74765	0.0115258	0.0154161	0.71276				0.71276	0.110743	0.155372
52615	0.6127	0.6259	0.6193	0.00933381	0.0150715	0.4531	0.4747	0.4639	0.0152735	0.0329241	0.5418	0.5435	0.54265	0.00120208	0.00221521	0.702	0.6883	0.69515	0.00968736	0.0139356	0.6045	0.575	0.58975	0.0208597	0.0353703	0.58215				0.58215	0.0862412	0.148143
65908	0.5541	0.6065	0.5803	0.0370524	0.0638504	0.5386	0.5379	0.53825	0.000494975	0.0009196	0.5704	0.5603	0.56535	0.00714178	0.0126325	0.6122	0.6388	0.6255	0.018809	0.0300704	0.5774	0.574	0.5757	0.00240416	0.00417607	0.57702				0.57702	0.0316311	0.0548181
139661	0.793	0.8082	0.8006	0.010748	0.013425	0.5874	0.596	0.5917	0.00608112	0.0102774	0.5037	0.5241	0.5139	0.014425	0.0280696	0.7871	0.7681	0.7776	0.013435	0.0172776	0.5338	0.514	0.5239	0.0140007	0.026724	0.64154				0.64154	0.138228	0.215462
141485	0.7018	0.6428	0.6723	0.0417193	0.0620546	0.4959	0.5381	0.517	0.0298399	0.0577174	0.5507	0.5504	0.55055	0.000212132	0.000385309	0.7945	0.7947	0.7946	0.000141421	0.000177978	0.6678	0.6773	0.67255	0.00671751	0.00998813	0.6414				0.6414	0.11082	0.172779
203066	0.6881	0.6983	0.6932	0.00721249	0.0104046	0.4511	0.4651	0.4581	0.00989949	0.0216099	0.4696	0.4555	0.46255	0.00997021	0.0215549	0.8734	0.8466	0.86	0.0189505	0.0220354	0.7694	0.7381	0.75375	0.0221324	0.0293631	0.64552				0.64552	0.179299	0.27776
203309	0.7308	0.7516	0.7412	0.0147078	0.0198433	0.5231	0.4913	0.5072	0.022486	0.0443336	0.4671	0.4689	0.468	0.00127279	0.00271964	0.8449	0.8266	0.83575	0.0129401	0.0154832	0.7456	0.7594	0.7525	0.00975807	0.0129675	0.66093				0.66093	0.162976	0.246587
288185	0.7057	0.7632	0.73445	0.0406586	0.0553593	0.5583	0.6292	0.59375	0.0501339	0.084436	0.5321	0.5464	0.53925	0.0101116	0.0187513	0.7276	0.5152	0.6214	0.150189	0.241695	0.6456	0.5648	0.6052	0.0571342	0.0944055	0.61881				0.61881	0.0716281	0.115751
288186	0.8142	0.7489	0.78155	0.0461741	0.0590801	0.5744	0.6144	0.5944	0.0282843	0.0475846	0.5029	0.5209	0.5119	0.0127279	0.0248641	0.7239	0.6517	0.6878	0.0510531	0.0742267	0.6973	0.6917	0.6945	0.0039598	0.00570165	0.65403				0.65403	0.103436	0.158152
288187	0.6582	0.6671	0.66265	0.00629325	0.0094971	0.5227	0.5182	0.52045	0.00318198	0.0061139	0.4616	0.4706	0.4661	0.00636396	0.0136536	0.5699	0.7588	0.66435	0.133572	0.201057	0.7477	0.7177	0.7327	0.0212132	0.0289521	0.60925				0.60925	0.111248	0.182599
288189	0.7537	0.7115	0.7326	0.0298399	0.0407315	0.4594	0.473	0.4662	0.00961665	0.0206277	0.5542	0.5536	0.5539	0.000424264	0.000765958	0.7719	0.7539	0.7629	0.0127279	0.0166836	0.7407	0.7461	0.7434	0.00381838	0.00513637	0.6518				0.6518	0.133505	0.204825
288199	0.6291	0.6273	0.6282	0.00127279	0.00202609	0.4352	0.4011	0.41815	0.0241123	0.0576643	0.4717	0.431	0.45135	0.0287792	0.0637626	0.4948	0.6541	0.57445	0.112642	0.196087	0.6494	0.6703	0.65985	0.0147785	0.0223968	0.5464				0.5464	0.107041	0.195903
288210	0.486	0.4479	0.46695	0.0269408	0.0576952	0.5665	0.5804	0.57345	0.00982878	0.0171397	0.5605	0.5513	0.5559	0.00650538	0.0117024	0.6433	0.6158	0.62955	0.0194454	0.0308878	0.7133	0.7034	0.70835	0.00700036	0.00988262	0.58684				0.58684	0.089581	0.15265
324296	0.7706	0.769	0.7698	0.00113137	0.00146969	0.6821	0.6764	0.67925	0.00403051	0.00593376	0.6401	0.6453	0.6427	0.00367696	0.00572111	0.8263	0.8422	0.83425	0.011243	0.0134768	0.8418	0.8669	0.85435	0.0177484	0.0207741	0.75607				0.75607	0.093158	0.123213
326308	0.7896	0.7364	0.763	0.0376181	0.0493029	0.6297	0.5767	0.6032	0.0374767	0.0621297	0.5835	0.5824	0.58295	0.000777817	0.00133428	0.7865	0.814	0.80025	0.0194454	0.0242992	0.925	0.9356	0.9303	0.00749533	0.0080569	0.73594				0.73594	0.144629	0.196522
497193	0.6353	0.619	0.62715	0.0115258	0.0183781	0.516	0.5343	0.52515	0.0129401	0.0246407	0.4809	0.5015	0.4912	0.0145664	0.0296547	0.6177	0.6514	0.63455	0.0238295	0.0375534	0.5929	0.7956	0.69425	0.143331	0.206454	0.59446				0.59446	0.0838159	0.140995
497202	0.5717	0.6106	0.59115	0.0275065	0.0465304	0.4918	0.4966	0.4942	0.00339411	0.00686789	0.4965	0.4988	0.49765	0.00162635	0.00326805	0.6517	0.6654	0.65855	0.00968736	0.0147101	0.8413	0.8471	0.8442	0.00410122	0.00485811	0.61715				0.61715	0.144342	0.233885
497203	0.7282	0.7144	0.7213	0.00975807	0.0135285	0.6375	0.55	0.59375	0.0618718	0.104205	0.4469	0.4457	0.4463	0.000848528	0.00190125	0.6054	0.6087	0.60705	0.00233345	0.00384392	0.7686	0.797	0.7828	0.0200818	0.0256538	0.63024				0.63024	0.129682	0.205766
497237	0.4975	0.508	0.50275	0.00742462	0.014768	0.5375	0.557	0.54725	0.0137886	0.0251961	0.5471	0.5597	0.5534	0.00890955	0.0160996	0.5558	0.5924	0.5741	0.0258801	0.0450794	0.67	0.7011	0.68555	0.021991	0.0320779	0.57261				0.57261	0.0682829	0.119249
497243	0.6688	0.6669	0.66785	0.0013435	0.00201168	0.4879	0.4866	0.48725	0.000919239	0.00188659	0.6063	0.6111	0.6087	0.00339411	0.005576	0.6956	0.7951	0.74535	0.0703571	0.0943947	0.7805	0.7883	0.7844	0.00551543	0.0070314	0.65871				0.65871	0.117567	0.17848
497248	0.7457	0.7565	0.7511	0.00763675	0.0101674	0.4606	0.474	0.4673	0.00947523	0.0202765	0.4885	0.4913	0.4899	0.0019799	0.00404143	0.8314	0.7858	0.8086	0.0322441	0.0398764	0.8211	0.8222	0.82165	0.000777817	0.000946653	0.66771				0.66771	0.174844	0.261856
497251	0.7498	0.7958	0.7728	0.0325269	0.0420897	0.6103	0.6073	0.6088	0.00212132	0.00348443	0.6211	0.6307	0.6259	0.00678823	0.0108455	0.6368	0.6709	0.65385	0.0241123	0.0368775	0.8899	0.9137	0.9018	0.0168291	0.0186617	0.71263				0.71263	0.123656	0.173521
497252	0.7194	0.7213	0.72035	0.0013435	0.00186507	0.5465	0.5446	0.54555	0.0013435	0.00246266	0.5739	0.5795	0.5767	0.0039598	0.0068663	0.7356	0.7858	0.7607	0.0354968	0.0466633	0.7923	0.7707	0.7815	0.0152735	0.0195438	0.67696				0.67696	0.108564	0.16037
497261	0.8358	0.8643	0.85005	0.0201525	0.0237075	0.6447	0.4751	0.5599	0.119925	0.214191	0.7331	0.7444	0.73875	0.00799031	0.010816	0.7693	0.7327	0.751	0.0258801	0.0344609	0.9181	0.9461	0.9321	0.019799	0.0212413	0.76636				0.76636	0.13973	0.182329
497272	0.7203	0.7215	0.7209	0.000848528	0.00117704	0.6092	0.5995	0.60435	0.00685894	0.0113493	0.5865	0.5674	0.57695	0.0135057	0.0234089	0.7873	0.8371	0.8122	0.0352139	0.0433562	0.6665	0.6783	0.6724	0.00834386	0.0124091	0.67736				0.67736	0.0942268	0.139109
497276	0.6086	0.7283	0.66845	0.0846407	0.126622	0.3812	0.4365	0.40885	0.039103	0.0956414	0.5101	0.4984	0.50425	0.00827315	0.0164068	0.687	0.6597	0.67335	0.019304	0.0286686	0.5572	0.5774	0.5673	0.0142836	0.0251781	0.56444				0.56444	0.112382	0.199103
497302	0.8564	0.8563	0.85635	7.07107e-05	8.25722e-05	0.7225	0.7117	0.7171	0.00763675	0.0106495	0.7961	0.7821	0.7891	0.00989949	0.0125453	0.8673	0.8063	0.8368	0.0431335	0.0515458	0.8367	0.8668	0.85175	0.0212839	0.0249885	0.81022				0.81022	0.0584735	0.0721699
519611	0.4843	0.5082	0.49625	0.0168999	0.0340551	0.5323	0.5345	0.5334	0.00155563	0.00291645	0.5424	0.5573	0.54985	0.0105359	0.0191614	0.6881	0.6213	0.6547	0.0472347	0.0721471	0.8422	0.8245	0.83335	0.0125158	0.0150186	0.61351				0.61351	0.136241	0.222068
519622	0.9182	0.9283	0.92325	0.00714178	0.00773548	0.6903	0.6851	0.6877	0.00367696	0.00534674	0.6686	0.6552	0.6619	0.00947523	0.0143152	0.8092	0.7774	0.7933	0.022486	0.0283449	0.7441	0.7123	0.7282	0.022486	0.0308789	0.75887				0.75887	0.104421	0.137601
575054	0.7348	0.7287	0.73175	0.00431335	0.00589457	0.4771	0.4874	0.48225	0.0072832	0.0151025	0.4265	0.4231	0.4248	0.00240416	0.00565952	0.5475	0.5422	0.54485	0.00374767	0.00687834	0.6686	0.6719	0.67025	0.00233345	0.00348147	0.57078				0.57078	0.128088	0.224408
mn1	0.7813	0.7784	0.77985	0.00205061	0.00262949	0.5754	0.5824	0.5789	0.00494975	0.00855026	0.6119	0.6121	0.612	0.000141421	0.000231081	0.5821	0.5586	0.57035	0.016617	0.0291348	0.7702	0.7573	0.76375	0.00912168	0.0119433	0.66097				0.66097	0.10252	0.155106
mn2	0.5294	0.5371	0.53325	0.00544472	0.0102104	0.42	0.42	0.42	0	0	0.5111	0.4986	0.50485	0.00883883	0.0175078	0.696	0.6863	0.69115	0.00685894	0.00992395	0.7382	0.7174	0.7278	0.0147078	0.0202086	0.57541				0.57541	0.12993	0.225804
mn3	0.4855	0.655	0.57025	0.119855	0.210179	0.4746	0.4783	0.47645	0.0026163	0.00549123	0.4616	0.468	0.4648	0.00452548	0.00973641	0.6732	0.6379	0.65555	0.0249609	0.0380762	0.7329	0.7271	0.73	0.00410122	0.00561811	0.57941				0.57941	0.11434	0.197339
mn8	0.5603	0.5983	0.5793	0.0268701	0.0463837	0.5707	0.5541	0.5624	0.011738	0.0208712	0.5535	0.553	0.55325	0.000353553	0.000639048	0.5407	0.5847	0.5627	0.0311127	0.0552918	0.7523	0.7434	0.74785	0.00629325	0.00841512	0.6011				0.6011	0.0825722	0.137368
mn9	0.8918	0.8646	0.8782	0.0192333	0.0219008	0.5326	0.6216	0.5771	0.0629325	0.10905	0.6491	0.6286	0.63885	0.0144957	0.0226903	0.8624	0.8068	0.8346	0.0393151	0.0471066	0.8664	0.8598	0.8631	0.0046669	0.00540714	0.75837				0.75837	0.139895	0.184468
mn10	0.6295	0.6358	0.63265	0.00445477	0.00704145	0.7245	0.7086	0.71655	0.011243	0.0156905	0.7302	0.7124	0.7213	0.0125865	0.0174497	0.4605	0.4597	0.4601	0.000565685	0.00122948	0.4534	0.6944	0.5739	0.170413	0.296938	0.6209				0.6209	0.108895	0.175383
mn14	0.6789	0.5919	0.6354	0.0615183	0.0968182	0.5228	0.5334	0.5281	0.00749533	0.014193	0.5626	0.5745	0.56855	0.00841457	0.0148001	0.6838	0.7333	0.70855	0.0350018	0.0493992	0.8544	0.7808	0.8176	0.0520431	0.0636534	0.65164				0.65164	0.115338	0.176996
mn15	0.606	0.5668	0.5864	0.0277186	0.0472691	0.5294	0.5069	0.51815	0.0159099	0.0307052	0.5777	0.5327	0.5552	0.0318198	0.0573123	0.6317	0.5393	0.5855	0.0653367	0.111591	0.866	0.8597	0.86285	0.00445477	0.00516286	0.62162				0.62162	0.137709	0.221532
mn16	0.7623	0.8306	0.79645	0.0482954	0.0606383	0.5016	0.4955	0.49855	0.00431335	0.00865179	0.595	0.5982	0.5966	0.00226274	0.00379273	0.7705	0.756	0.76325	0.010253	0.0134334	0.7067	0.7062	0.70645	0.000353553	0.000500465	0.67226				0.67226	0.123259	0.18335
mn22	0.5718	0.5869	0.57935	0.0106773	0.0184298	0.5128	0.4209	0.46685	0.0649831	0.139195	0.4761	0.4761	0.4761	0	0	0.6729	0.7377	0.7053	0.0458205	0.064966	0.8339	0.8296	0.83175	0.00304056	0.00365562	0.61187				0.61187	0.156204	0.255289
mn24	0.6658	0.6889	0.67735	0.0163342	0.0241148	0.4379	0.4323	0.4351	0.0039598	0.00910089	0.4929	0.4851	0.489	0.00551543	0.011279	0.6704	0.6311	0.65075	0.0277893	0.0427035	0.8605	0.8453	0.8529	0.010748	0.0126017	0.62102				0.62102	0.165696	0.266813
mn2i	0.6322	0.6168	0.6245	0.0108894	0.0174371	0.5275	0.5001	0.5138	0.0193747	0.0377087	0.5391	0.541	0.54005	0.0013435	0.00248774	0.5712	0.5989	0.58505	0.0195869	0.0334789	0.7151	0.7302	0.72265	0.0106773	0.0147752	0.59721				0.59721	0.0819334	0.137194
MEAN			0.700989	0.0193387	0.0288713			0.536324	0.0148955	0.0280951			0.548963	0.00749919	0.013808			0.681757	0.0280053	0.0436128			0.746202	0.0178345	0.0260579					0.642847	0.0945228	0.147038
STD			0.109855					0.0722389					0.0737423					0.118396					0.108814					0.149045				0.185534
CV			0.156715					0.134693					0.13433					0.173664					0.145824			MEAN	0.642847
																										STD	0.0660571
																										CV	0.102757

[truncated: 16 more sheets: Euclidean Distance, Intensity Contrast, Red Contrast, Blue contrast, Green Contrast, Yellow Contrast, Centrality Ratio, Occupation Factor, Normalized Offset, Scute Radius, Scute Eccentricity, SCORES_ALLVIEWS, SCORES_PER_VIEW, Visual, Ratio, CV Between Views]
