# Supplementary material for: New approaches for capturing and estimating variation in complex animal color patterns from digital photographs: application to the Eastern Box Turtle (Terrapene carolina)
Source: PeerJ journal article supplement (doi:10.7717/peerj.19690), 2025-07-21
Supplement: PeerJ_All_DataAnalysisFiles.zip [file PeerJ_Data_ConsensusCitizenSurvey_Figure10.xlsx]

## Sheet: Turtle 1
2024 Number	Categories
	M-shaped	Single spotted	Striated	Blotchy	Spotted	Starburst	Speckled	Banded	Patchy	TOTAL
student01	0	0	0	1	0	0	0	0	1	2		9.56935
student02	0	0	0	0	1	0	0	0	0	1
student03	0	0	0	1	1	0	1	0	0	3
student04	0	0	1	1	0	0	0	0	1	3
student05	0	0	1	0	1	0	0	0	0	2
student06	0	0	0	0	0	0	1	0	1	2
student07	1	0	0	1	0	0	1	0	1	4
student08	0	0	1	1	0	0	0	0	1	3
student09	0	0	0	1	1	0	0	0	1	3
student10	0	0	0	1	0	0	0	0	1	2
student11	0	0	0	1	1	0	1	0	1	4
student12	0	0	0	1	1	0	1	0	1	4
student13	0	0	0	0	0	0	1	1	1	3
student14	0	1	0	0	0	1	0	0	1	3
student15	1	0	0	1	0	0	0	1	1	4
student16	0	0	0	0	1	0	0	0	0	1
student17	0	0	1	1	0	0	1	0	1	4
student18	0	0	0	1	0	0	1	0	1	3
student19	0	0	0	1	0	0	1	0	0	2
student20	0	0	0	1	1	0	0	0	1	3
student21	1	0	1	1	0	0	0	0	1	4
student22	0	0	0	1	0	0	0	0	1	2
student23	1	0	1	1	0	0	0	1	1	5
student24	0	0	0	1	1	0	1	0	1	4
student25	1	0	1	1	0	0	0	0	1	4
student26	0	0	0	1	1	0	0	0	1	3
student27	1	0	0	0	1	0	0	0	0	2
student28	0	0	0	1	1	0	0	0	1	3
student29	1	0	0	1	0	0	1	0	1	4
student30	0	0	0	1	1	0	1	0	1	4
student31	0	0	0	1	1	0	1	0	1	4
TOTAL	24	30	24	24	17	30	18	28	25	220
	0.774194	0.967742	0.774194	0.774194	0.548387	0.967742	0.580645	0.903226	0.806452	0.78853

## Sheet: Turtle8
2024 Number	Categories
	M-shaped	Single spotted	Striated	Blotchy	Spotted	Starburst	Speckled	Banded	Patchy	TOTAL
student01	1	0	1	0	0	1	0	1	0	4		#DIV/0!
student02	1	0	0	0	0	0	0	0	0	1
student03	1	0	0	0	0	0	0	0	0	1
student04	1	0	1	0	0	0	0	0	0	2
student05	1	0	0	0	0	0	0	0	0	1
student06	1	0	0	0	0	0	0	0	0	1
student07	1	0	0	0	0	0	1	1	1	3
student08	1	0	0	0	0	0	0	0	0	1
student09	1	0	0	0	0	0	0	1	0	2
student10	1	0	0	0	0	0	0	0	0	1
student11	1	0	0	0	0	0	0	0	0	1
student12	1	0	0	0	1	0	1	1	0	4
student13	1	0	0	1	1	0	0	1	0	4
student14	1	0	0	0	0	0	0	1	0	2
student15	1	0	0	0	1	0	0	0	0	2
student16	1	0	0	0	0	0	0	0	0	1
student17	1	1	1	0	1	0	0	0	0	4
student18	1	0	0	0	0	0	0	0	0	1
student19	1	0	0	0	0	0	0	0	0	1
student20	1	0	0	0	0	0	0	1	0	2
student21	1	0	1	0	1	0	0	0	0	3
student22	1	0	0	0	0	0	0	0	0	1
student23	1	1	0	0	0	0	0	1	0	3
student24	1	1	0	0	0	0	1	0	0	3
student25	1	0	1	1	0	0	0	1	0	4
student26	1	1	0	0	0	0	0	0	0	2
student27	1	0	0	0	0	0	0	0	0	1
student28	1	0	0	0	0	1	0	0	0	2
student29	1	1	0	0	0	0	0	0	0	2
student30	1	0	1	0	1	0	0	1	0	4
student31	1	0	0	0	0	0	0	0	0	1
TOTAL	31	26	25	29	25	29	28	21	30	244
	1	0.83871	0.806452	0.935484	0.806452	0.935484	0.903226	0.677419	0.967742	0.874552

## Sheet: Turtle15
2024 Number	Categories
	M-shaped	Single spotted	Striated	Blotchy	Spotted	Starburst	Speckled	Banded	Patchy	TOTAL
student01	1	0	0	0	1	1	0	0	0	3		9.2358
student02	1	1	0	0	0	0	0	0	0	2
student03	1	0	0	1	0	0	0	0	0	2
student04	1	0	1	0	0	0	0	1	1	4
student05	1	0	0	0	0	0	0	0	1	2
student06	0	0	0	1	0	1	0	0	1	3
student07	1	0	1	1	0	0	0	1	0	4
student08	1	0	0	1	0	0	0	1	0	3
student09	1	0	0	0	0	0	0	0	0	1
student10	1	0	0	1	0	0	0	0	0	2
student11	1	0	1	0	0	0	0	1	0	3
student12	1	0	0	1	0	0	1	1	0	4
student13	1	0	0	0	0	0	0	1	1	3
student14	1	0	0	0	0	0	0	0	0	1
student15	1	0	0	0	0	0	0	0	1	2
student16	1	0	0	0	0	1	0	0	0	2
student17	0	0	1	1	0	0	0	1	0	3
student18	0	0	0	1	0	0	0	0	1	2
student19	1	0	0	0	0	0	0	0	0	1
student20	1	0	1	1	0	1	0	0	0	4
student21	1	0	1	1	0	0	0	1	0	4
student22	1	0	0	0	1	0	0	0	0	2
student23	1	0	0	0	0	0	0	1	0	2
student24	1	0	0	0	1	0	1	0	0	3
student25	1	0	1	0	0	0	1	0	1	4
student26	1	1	0	1	0	0	0	0	1	4
student27	1	0	1	0	0	1	0	1	0	4
student28	1	0	0	0	0	0	0	1	1	3
student29	1	0	1	1	0	0	0	0	0	3
student30	1	0	0	0	1	0	0	1	1	4
student31	1	0	0	0	0	0	0	0	1	2
TOTAL	28	29	22	19	27	26	28	19	20	218
	0.903226	0.935484	0.709677	0.612903	0.870968	0.83871	0.903226	0.612903	0.645161	0.781362

## Sheet: Turtle35
2024 Number	Categories
	M-shaped	Single spotted	Striated	Blotchy	Spotted	Starburst	Speckled	Banded	Patchy	TOTAL
student01	0	0	0	1	0	0	0	0	1	2		8.50679
student02	0	0	1	0	0	1	0	1	0	3
student03	0	0	1	1	0	0	0	0	1	3
student04	0	0	1	1	0	0	0	0	1	3
student05	1	0	0	1	0	0	0	0	0	2
student06	0	0	0	0	0	0	1	0	0	1
student07	0	0	1	0	0	0	1	1	1	4
student08	0	0	0	1	0	0	0	1	0	2
student09	1	0	0	1	0	0	0	0	0	2
student10	0	1	0	0	0	0	0	0	0	1
student11	0	0	1	1	0	0	1	0	0	3
student12	1	0	0	1	0	0	0	0	1	3
student13	0	0	0	0	0	1	0	1	1	3
student14	1	0	1	0	0	0	0	0	1	3
student15	0	0	0	1	0	0	0	0	1	2
student16	1	0	0	0	0	1	0	0	0	2
student17	0	0	0	1	0	0	1	0	1	3
student18	0	0	0	0	0	0	0	1	1	2
student19	0	0	0	0	0	0	0	0	1	1
student20	0	0	0	0	1	1	1	0	0	3
student21	1	0	1	0	0	0	0	0	1	3
student22	1	0	1	0	0	0	0	0	0	2
student23	1	0	0	1	0	0	0	1	0	3
student24	0	0	0	1	1	0	0	0	1	3
student25	1	0	1	0	0	1	0	1	0	4
student26	0	0	0	1	0	0	0	0	1	2
student27	0	0	1	0	0	1	0	1	1	4
student28	0	0	1	0	0	0	0	1	0	2
student29	1	0	0	0	0	0	0	1	0	2
student30	0	0	1	1	0	1	0	0	1	4
student31	0	0	0	0	1	0	0	0	0	1
TOTAL	21	30	19	17	28	24	26	21	16	202
	0.677419	0.967742	0.612903	0.548387	0.903226	0.774194	0.83871	0.677419	0.516129	0.724014

## Sheet: Turtle66
2024 Number	Categories
	M-shaped	Single spotted	Striated	Blotchy	Spotted	Starburst	Speckled	Banded	Patchy	TOTAL
student01	0	0	0	1	1	1	1	0	0	4		8.56566
student02	1	0	1	0	0	1	0	0	0	3
student03	1	0	0	0	1	0	0	1	1	4
student04	1	0	1	0	0	0	0	1	1	4
student05	0	0	0	0	0	0	0	0	1	1
student06	0	0	0	0	0	1	1	0	0	2
student07	0	0	1	0	0	1	0	1	1	4
student08	1	0	0	1	0	0	1	0	1	4
student09	1	0	0	0	0	0	0	0	0	1
student10	0	0	0	1	0	0	0	0	0	1
student11	0	0	1	0	1	0	1	1	0	4
student12	1	0	1	0	1	0	1	0	0	4
student13	0	0	0	1	0	0	0	1	0	2
student14	0	0	1	1	0	1	0	1	1	5
student15	1	0	1	0	0	0	0	0	0	2
student16	1	0	0	0	0	0	0	0	0	1
student17	1	0	1	0	0	0	1	1	0	4
student18	0	0	1	0	0	0	0	0	1	2
student19	1	0	0	0	0	1	0	0	1	3
student20	0	0	0	1	1	0	1	0	0	3
student21	0	0	1	1	0	0	0	0	1	3
student22	1	0	0	0	0	0	0	1	0	2
student23	1	0	0	1	0	0	0	1	1	4
student24	0	0	1	1	0	0	0	1	1	4
student25	1	0	1	0	0	1	0	0	1	4
student26	1	0	0	0	1	0	1	0	0	3
student27	0	0	1	1	0	0	0	0	1	3
student28	1	0	1	0	0	0	0	1	1	4
student29	1	0	0	1	0	0	0	1	0	3
student30	0	1	0	1	0	1	0	1	0	4
student31	1	0	1	1	0	0	0	1	0	4
TOTAL	17	30	16	18	25	23	23	17	17	186
	0.548387	0.967742	0.516129	0.580645	0.806452	0.741935	0.741935	0.548387	0.548387	0.666667

## Sheet: Turtle72
2024 Number	Categories
	M-shaped	Single spotted	Striated	Blotchy	Spotted	Starburst	Speckled	Banded	Patchy	TOTAL
student01	1	0	0	1	0	0	0	0	1	3		9.35669
student02	1	0	0	1	0	0	0	0	0	2
student03	1	0	0	1	0	0	0	1	1	4
student04	1	0	1	1	0	0	0	0	1	4
student05	1	0	0	0	0	0	0	0	1	2
student06	0	0	0	1	0	0	1	0	0	2
student07	0	1	0	1	0	0	0	1	1	4
student08	1	0	0	1	0	0	0	1	0	3
student09	1	0	0	1	0	0	0	0	0	2
student10	0	0	0	1	0	0	0	0	1	2
student11	1	0	0	0	1	0	0	1	0	3
student12	1	0	0	0	0	1	0	1	0	3
student13	1	0	0	1	0	0	0	1	0	3
student14	1	0	1	1	0	0	0	0	0	3
student15	1	0	1	0	0	0	0	0	0	2
student16	1	0	0	1	0	0	0	0	1	3
student17	0	1	1	0	0	1	0	0	1	4
student18	0	0	1	1	0	0	0	0	0	2
student19	1	0	0	0	0	1	0	0	1	3
student20	0	0	0	1	1	0	1	0	0	3
student21	1	0	1	1	0	0	0	0	1	4
student22	1	0	0	1	0	0	1	0	1	4
student23	1	0	0	1	0	0	0	1	1	4
student24	1	0	0	1	0	0	1	0	1	4
student25	1	1	0	0	0	1	0	0	1	4
student26	1	0	0	0	1	0	0	0	0	2
student27	0	0	1	1	0	1	0	0	0	3
student28	1	0	0	1	0	0	0	0	1	3
student29	1	0	1	0	0	0	0	0	1	3
student30	1	0	1	1	0	0	1	0	0	4
student31	1	0	0	0	0	0	0	0	0	1
TOTAL	24	28	22	21	28	26	26	24	16	215
	0.774194	0.903226	0.709677	0.677419	0.903226	0.83871	0.83871	0.774194	0.516129	0.770609

## Sheet: Results
turtle	consensus_score from ExtractExcelData.m	one of the 55?						min/max consensus score		min/max consensus score
turtle54	0.8136	17923	1					0.6631	turtle 11	0.6667	turtle 66	139661
turtle06	0.6953	20544	2		55 Turtles	2024 Number		0.8746	turtle 8	0.8746	turtle 8	519622
turtle67	0.8423	22468	3		45779	1001
turtle25	0.7491	22609	4		497243	1002
turtle42	0.6918	22612	5		288187	1004		<70	13	13.2653
turtle36	0.724	22613	6		42825	1005		>80	15	15.3061
turtle86	0.6989	22614	7		20544	1006		0.755467
turtle92	0.7419	27761	8		519622	1008		0.708568
turtle84	0.7133	36684	9		141485	1009		0.802367
turtle56	0.7204	42824	10		575054	1013		0.0468998
turtle05	0.7133	42825	11		497302	1015
turtle79	0.7563	45769	12		203309	1018			8	0.150943
turtle01	0.7885	45779	13		mn2	1019			11	0.207547
turtle64	0.7921	49607	14		22609	1025			0.762834
turtle55	0.724	52615	15		mn14	1027			0.0504692
turtle81	0.81	65908	16		497248	1032
turtle66	0.6667	139661	17		497261	1033
turtle09	0.7957	141485	18		288199	1034
turtle82	0.7993	203066	19		22613	1036
turtle18	0.7455	203309	20		mn16	1038
turtle44	0.6989	288185	21		22612	1042
turtle72	0.7706	288186	22		288185	1044
turtle04	0.724	288187	23		324296	1045
turtle46	0.7025	288189	24		288189	1046
turtle34	0.7419	288199	25		mn1	1047
turtle53	0.7706	288210	26		mn15	1049
turtle45	0.7993	324296	27		497193	1051
turtle97	0.8065	326308	28		288210	1053
turtle51	0.7885	497193	29		17923	1054
turtle95	0.8172	497202	30		52615	1055
turtle60	0.7491	497203	31		42824	1056
turtle57	0.853	497237	32		497237	1057
turtle02	0.7814	497243	33		497203	1060
turtle32	0.7993	497248	34		497272	1062
turtle91	0.8495	497251	35		49607	1064
turtle65	0.6846	497252	36		497252	1065
turtle33	0.7634	497261	37		139661	1066
turtle62	0.7599	497272	38		22468	1067
turtle98	0.767	497276	39		519611	1070
turtle15	0.7814	497302	40		288186	1072
turtle70	0.8351	519611	41		mn9	1075
turtle08	0.8746	519622	42		45769	1079
turtle13	0.7957	575054	43		mn10	1080
turtle47	0.6882	mn1	1		65908	1081
turtle80	0.7276	mn10	2		203066	1082
turtle27	0.7849	mn14	3		mn2i	1083		mean(individual_consensus_scores) from ExtractExcelData.m
turtle49	0.6989	mn15	4		36684	1084		M-shaped	Single spotted	Striated	Blotchy	Spotted	Starburst	Speckled	Banded	Patchy
turtle38	0.7814	mn16	5		mn3	1085		0.7962	0.9101	0.6959	0.6722	0.7584	0.8173	0.7666	0.714	0.6685	0.6685
turtle19	0.8495	mn2	6		22614	1086											0.9101
turtle83	0.7133	mn2i	7		mn8	1090
turtle85	0.7312	mn3	8		497251	1091
turtle90	0.7563	mn8	9		27761	1092
turtle75	0.8029	mn9	10		497202	1095
turtle03	0.7563				326308	1097
turtle07	0.724				497276	1098
turtle10	0.8208				mn22	N/A
turtle11	0.6631				mn24	N/A
turtle12	0.7025
turtle14	0.7491
turtle16	0.7921
turtle17	0.8136
turtle20	0.7527
turtle21	0.7814
turtle22	0.7061
turtle23	0.724
turtle24	0.7097
turtle26	0.7778
turtle28	0.7814
turtle29	0.7133
turtle30	0.7204
turtle31	0.7742
turtle35	0.724
turtle37	0.7204
turtle39	0.6953
turtle40	0.8602
turtle41	0.7097
turtle43	0.7527
turtle48	0.7348
turtle50	0.7348
turtle52	0.8315
turtle58	0.7706
turtle59	0.6989
turtle61	0.724
turtle63	0.7849
turtle68	0.7097
turtle69	0.7706
turtle71	0.7706
turtle73	0.7993
turtle74	0.7742
turtle76	0.7204
turtle77	0.7455
turtle78	0.7348
turtle87	0.6989
turtle88	0.7742
turtle89	0.6953
turtle93	0.7419
turtle94	0.724
turtle96	0.7419
			53

## Sheet: ConsensusVsIDforCorrelation
	Score August 2024
turtle	consensus_score from ExtractExcelData.m	one of the 55?		Turtle	ID	ID	Correlation Consensus ID	Complexity					older ref	older ref
turtle54	0.8136	17923		1093	17923	17923	17923	0.1864					id45779	1001
turtle06	0.6953	20544		1011	20544	20544	20544	0.3047					id497243	1002
turtle67	0.8423	22468		1117	22468	22468	22468	0.1577					id26172	1003
turtle25	0.7491	22609		1042	22609	22609	22609	0.2509					id141486	1004
turtle42	0.6918	22612		1070	22612	22612	22612	0.3082					id230328	1005
turtle36	0.724	22613		1061	22613	22613	22613	0.276					id7-5_94	1006
turtle86	0.6989	22614		1141	22614	22614	22614	0.3011					id288187	1007
turtle92	0.7419	27761		1148	27761	27761	27761	0.2581					id54750	1008
turtle84	0.7133	36684		1139	36684	36684	36684	0.2867					id42825	1009
turtle56	0.7204	42824		1097	42824	42824	42824	0.2796					id519654	1010
turtle05	0.7133	42825		1009	42825	42825	42825	0.2867					id20544	1011
turtle79	0.7563	45769		1134	45769	45769	45769	0.2437					id22608	1012
turtle01	0.7885	45779		1001	45779	45779	45779	0.2115					id16229	1013
turtle64	0.7921	49607		1112	49607	49607	49607	0.2079					id519622	1014
turtle55	0.724	52615		1095	52615	52615	52615	0.276					id141485	1015
turtle81	0.81	65908		1136	65908	65908	65908	0.19					id519670	1016
turtle66	0.6667	139661		1116	139661	139661	139661	0.3333					id519665	1017
turtle09	0.7957	141485		1015	141485	141485	141485	0.2043					id519644	1018
turtle82	0.7993	203066		1137	203066	203066	203066	0.2007					id141937	1019
turtle18	0.7455	203309		1033	203309	203309	203309	0.2545					id519671	1020
turtle44	0.6989	288185		1078	288185	288185	288185	0.3011					id38892	1021
turtle72	0.7706	288186		1125	288186	288186	288186	0.2294					id22289	1022
turtle04	0.724	288187		1007	288187	288187	288187	0.276					id67773	1023
turtle46	0.7025	288189		1080	288189	288189	288189	0.2975					id497301	1024
turtle34	0.7419	288199		1058	288199	288199	288199	0.2581					id22611	1025
turtle53	0.7706	288210		1091	288210	288210	288210	0.2294					id519624	1026
turtle45	0.7993	324296		1079	324296	324296	324296	0.2007					id497300	1027
turtle97	0.8065	326308		1158	326308	326308	326308	0.1935					id519632	1028
turtle51	0.7885	497193		1087	497193	497193	497193	0.2115					id7-5_57	1029
turtle95	0.8172	497202		1156	497202	497202	497202	0.1828					id497302	1030
turtle60	0.7491	497203		1106	497203	497203	497203	0.2509					id288184	1031
turtle57	0.853	497237		1099	497237	497237	497237	0.147					id7-27_11x	1032
turtle02	0.7814	497243		1002	497243	497243	497243	0.2186					id203309	1033
turtle32	0.7993	497248		1053	497248	497248	497248	0.2007					id7-11_2	1034
turtle91	0.8495	497251		1147	497251	497251	497251	0.1505					id519664	1035
turtle65	0.6846	497252		1115	497252	497252	497252	0.3154					id29774	1036
turtle33	0.7634	497261		1055	497261	497261	497261	0.2366					id67772	1037
turtle62	0.7599	497272		1109	497272	497272	497272	0.2401					id575054	1038
turtle98	0.767	497276		1160	497276	497276	497276	0.233					id7-20_12	1039
turtle15	0.7814	497302		1030	497302	497302	497302	0.2186					id7-20_11	1040
turtle70	0.8351	519611		1121	519611	519611	519611	0.1649					id45346	1041
turtle08	0.8746	519622		1014	519622	519622	519622	0.1254					id22609	1042
turtle13	0.7957	575054		1038	575054	575054	575054	0.2043					id49960	1043
turtle47	0.6882	mn01		1081	mn1	id7-11_1	mn1	0.3118					id7-21_14	1044
turtle19	0.8495	mn02		1034	mn2	id7-11_2	mn2	0.1505					id288188	1045
turtle85	0.7312	mn03		1140	mn3	id7-11_3	mn3	0.2688					id54749	1046
turtle90	0.7563	mn08		1146	mn8	id7-13_8	mn8	0.2437					id497299	1047
turtle75	0.8029	mn09		1129	mn9	id7-13_9	mn9	0.1971					id22291	1048
turtle80	0.7276	mn10		1135	mn10	id7-20_10	mn10	0.2724					id288190	1049
turtle27	0.7849	mn14		1044	mn14	id7-21_14	mn14	0.2151					id7-11_4	1050
turtle49	0.6989	mn15		1084	mn15	id7-21_15	mn15	0.3011					id6-24_71	1051
turtle38	0.7814	mn16		1065	mn16	id7-25_16	mn16	0.2186					id7-30_108	1052
turtle83	0.7133	mn2i		1138	mn2i	id7-21_21x	mn2i	0.2867					id497248	1053
													id519653	1054
													id497261	1055
													id519649	1056
													id519627	1057
													id288199	1058
													id519655	1059
													id22290	1060
													id22613	1061
													id519666	1062
													id519626	1063
													id45781	1064
													id7-25_16	1065
													id7-13_6	1066
													id497246	1067
													id22465	1068
													id80304	1069
													id22612	1070
													id519633	1071
													id519634	1072
													id54751	1073
													id519631	1074
													id26173	1075
													id497232	1076
													id519646	1077
													id288185	1078
													id324296	1079
													id288189	1080
													id7-11_1	1081
													id22618	1082
													id519656	1083
													id7-21_15	1084
													id37783	1085
													id103824	1086
													id497193	1087
													id6-29_84	1088
													id8-2_17	1089
													id22616	1090
													id288210	1091
													id519667	1092
													id17923	1093
													id17461	1094
													id52615	1095
													id38891	1096
													id42824	1097
													id519652	1098
													id497237	1099
													id22619	1100
													id139660	1101
													id497250	1102
													id67771	1103
													id519669	1104
													id519642	1105
													id497203	1106
													id497254	1107
													id588439	1108
													id497272	1109
													id519668	1110
													id288209	1111
													id49607	1112
													id519661	1113
													id519663	1114
													id497252	1115
													id139661	1116
													id22468	1117
													id519618	1118
													id519625	1119
													id7-25_440x	1120
													id519611	1121
													id519662	1122
													id45780	1123
													id519643	1124
													id288186	1125
													id17375	1126
													id48676	1127
													id7-13_7	1128
													id7-13_9	1129
													id22610	1130
													id497236	1131
													id6-30_93	1132
													id497268	1133
													id45769	1134
													id7-20_10	1135
													id65908	1136
													id203066	1137
													id7-21_21x	1138
													id36684	1139
													id7-11_3	1140
													id22614	1141
													id17014	1142
													id519630	1143
													id7-20_13	1144
													id497235	1145
													id7-13_8	1146
													id497251	1147
													id27761	1148
													id288179	1149
													id374959	1150
													id519647	1151
													id62012	1152
													id7-22_107	1153
													id7-5_91	1154
													id7-12_5	1155
													id497202	1156
													id11600	1157
													id326308	1158
													id19036	1159
													id497276	1160
