# Supplementary material for: New approaches for capturing and estimating variation in complex animal color patterns from digital photographs: application to the Eastern Box Turtle (Terrapene carolina)
Source: PeerJ journal article supplement (doi:10.7717/peerj.19690), 2025-07-21
Supplement: PeerJ_All_DataAnalysisFiles.zip [file PeerJ_Data_ConsensusScores_Measures_Figure11.xlsx]

## Sheet: ConsensusScoreVsMeasures
Consensus Score	Fractional Area	Eccentricity	Average object areas	Peak Length	Objects	perimeter/area	Hue	Saturation	Brightness	Symmetry	Euclidean Distance	Intensity Contrast	Red contrast	Blue Contrast	Green Contrst	Yellow Contrast	Centrality Ratio	Occupation Factor	normalized offset
0.8136	0.401	0.8432	213.939	7.8052	1	0.53895	0.0698	0.46425	0.34225	0.91855	60.987	35.7234	47.8593	18.6891	32.8517	18.7227	0.83065	0.6901	0.0068
0.6953	0.3634	0.83035	39.8152	6.375	15	0.83315	0.06955	0.37465	0.18805	0.7058	21.7959	12.4709	18.0759	5.1691	11.0258	5.3331	0.8525	0.92945	0.0199
0.8423	0.3692	0.92405	107.228	8.60895	11.5	0.46885	0.08195	0.5609	0.41265	0.94495	96.9669	57.6523	75.5867	26.7364	54.523	26.8747	0.6591	0.6007	0.03855
0.7491	0.3906	0.77635	36.1628	6.37725	21.5	0.7658	0.07195	0.6963	0.20265	0.62525	33.8404	18.3084	30.0087	1.7196	15.5457	2.1375	0.97385	0.9564	0.0367
0.6918	0.2679	0.7905	24.1302	5.9232	12.5	1.02095	0.0729	0.40335	0.2266	0.60975	23.1537	13.2632	19.1056	5.7624	11.738	5.86415	0.81795	0.79185	0.02125
0.724	0.2799	0.81105	30.8775	6.45775	8.5	0.91625	0.0877	0.359	0.1909	0.55675	27.7187	16.309	21.1089	9.68045	15.1333	9.80735	0.78825	0.73945	0.1523
0.6989	0.30125	0.82355	42.3922	7.37715	10.5	0.73695	0.05975	0.6842	0.2232	0.76045	28.2044	12.3923	26.3929	-4.96195	8.61535	-3.5335	0.75945	0.7017	0.0529
0.7419	0.30615	0.8447	22.2194	6.1391	16	0.99575	0.08485	0.3705	0.2038	0.66515	24.6337	14.9537	18.2657	7.5531	14.7015	7.612	0.9184	0.99195	0.07525
0.7133	0.3416	0.5623	64.7126	8.4314	5	0.65205	0.0777	0.4671	0.2478	0.7708	44.6188	26.6211	34.6646	12.1828	25.3126	12.2331	0.71155	0.73755	0.0296
0.7204	0.3133	0.7666	50.8535	7.4375	7	0.7231	0.0633	0.54085	0.15715	0.79285	33.3616	19.1125	27.6579	7.7587	16.9637	8.00275	0.7711	0.75525	0.083
0.7133	0.34235	0.7929	67.859	9.9768	8	0.5147	0.09265	0.7103	0.4317	0.7604	95.6368	57.3782	75.618	17.7605	55.7874	17.9766	0.7439	0.6756	0.02255
0.7563	0.3774	0.75795	80.3152	9.0685	6	0.5611	0.09605	0.7144	0.2311	0.7298	58.4419	34.9098	46.5713	10.6836	33.6516	10.7981	0.90595	0.87455	0.0282
0.7885	0.23865	0.7582	37.6182	8.38155	6	0.74025	0.07985	0.40175	0.2083	0.78645	30.4272	17.7219	24.674	7.4443	16.1721	7.58435	0.729	0.5767	0.04035
0.7921	0.23275	0.71805	45.1501	10.0951	6	0.5995	0.09195	0.69675	0.33805	0.80695	83.2042	49.8219	65.9804	15.7632	48.177	16.1587	0.69225	0.70305	0.05285
0.724	0.2989	0.7635	29.9835	7.67165	16	0.7342	0.08875	0.69655	0.1951	0.6193	47.5358	28.2822	38.0673	8.9524	27.0256	9.01885	0.86645	0.80755	0.02515
0.81	0.2965	0.76025	20.9885	6.56155	5	0.91815	0.07095	0.52415	0.2528	0.5803	56.2979	33.1361	44.2324	16.4496	30.6923	16.5002	0.9764	0.89275	0.06005
0.6667	0.345	0.6545	45.3609	6.92235	4.5	0.83035	0.0636	0.4884	0.30215	0.8006	36.6606	21.2003	29.8835	9.2735	19.1031	9.28955	0.80795	0.8006	0.1076
0.7957	0.19815	0.7577	16.9828	7.9568	6	0.91785	0.06785	0.468	0.302	0.6723	47.3193	27.9089	37.1247	13.6029	25.994	13.6253	0.5695	0.4719	0.0257
0.7993	0.26535	0.84315	25.7608	6.5567	10	0.9064	0.0895	0.46315	0.427	0.6932	106.347	64.6098	76.7648	36.5615	63.8698	36.6504	0.7717	0.71115	0.0193
0.7455	0.21805	0.81265	45.4819	9.34155	7	0.70685	0.08455	0.4032	0.23675	0.7412	48.5709	29.2023	36.6453	14.9154	28.1724	15.1733	0.6572	0.55615	0.04445
0.6989	0.4066	0.8135	55.8184	5.11155	9	0.83015	0.05405	0.5044	0.2035	0.73445	23.0799	12.9931	19.692	4.22535	11.2709	4.2505	0.92275	0.95365	0.0291
0.7706	0.3191	0.8792	67.3126	8.2748	7.5	0.6038	0.06575	0.3766	0.16755	0.78155	20.9997	11.9908	17.4438	5.0593	10.5361	5.1701	0.74485	0.6687	0.0773
0.724	0.2241	0.75225	17.2043	6.67125	7.5	1.0264	0.11365	0.327	0.1457	0.66265	15.3601	8.714	12.7642	3.99935	7.5501	4.19425	0.7415	0.87175	0.0313
0.7025	0.2911	0.69215	40.1499	7.67285	9	0.7314	0.08495	0.3844	0.17365	0.7326	19.4781	10.8449	16.7043	4.0102	9.17315	4.1298	0.7127	0.64585	0.0557
0.7419	0.2254	0.7967	28.3449	8.6134	14.5	0.84205	0.0886	0.4055	0.1707	0.6282	29.1647	17.2425	22.7588	8.54505	16.1112	8.72375	0.91455	0.8028	0.0705
0.7706	0.3171	0.7846	24.575	6.4343	19.5	0.92125	0.06775	0.4389	0.15085	0.46695	20.888	11.9236	17.4304	4.6955	10.5075	4.8192	0.9727	0.9262	0.0583
0.7993	0.30055	0.7757	71.4333	9.03845	7	0.5932	0.06515	0.4874	0.2254	0.7698	39.3381	22.5382	32.3708	10.1594	19.9099	10.2001	0.69885	0.6322	0.0316
0.8065	0.2675	0.7555	96.7058	9.2851	3	0.55605	0.08055	0.4164	0.2894	0.763	62.2163	37.1077	47.4732	19.3102	35.2745	19.6568	0.5685	0.51165	0.02985
0.7885	0.26535	0.7288	22.9656	7.78595	18	0.8099	0.0796	0.3355	0.2265	0.62715	26.6831	15.6026	21.2963	7.37715	14.283	7.4793	0.78285	0.82635	0.03365
0.8172	0.36205	0.79145	47.4912	6.07325	7.5	0.70905	0.0587	0.4741	0.194	0.59115	27.8652	15.8126	23.3498	6.4052	13.7869	6.47915	0.7911	0.8359	0.05665
0.7491	0.15025	0.7799	25.5567	9.3527	8	0.8795	0.0869	0.30035	0.1771	0.7213	25.8281	14.9659	20.4117	8.33275	13.454	8.55235	0.6153	0.4144	0.06655
0.853	0.27235	0.8083	19.7738	5.19065	16	1.0468	0.0858	0.2819	0.18165	0.50275	22.6604	13.3734	17.054	8.1772	12.4809	8.3139	0.8698	0.77845	0.0991
0.7814	0.20355	0.7499	29.3678	8.41035	7	0.9107	0.07775	0.38495	0.1946	0.66785	29.6227	17.0793	24.2626	7.443	15.2755	8.00185	0.6598	0.6129	0.03665
0.7993	0.35825	0.747	60.4491	7.2772	8	0.65785	0.07435	0.41485	0.2196	0.7511	42.183	24.6156	33.4575	12.4886	22.4488	12.9159	0.8441	0.76865	0.0511
0.8495	0.3193	0.8246	93.2035	6.5739	4	0.78275	0.06825	0.4158	0.26515	0.7728	42.098	24.5027	33.5151	12.4187	22.2429	12.4657	0.74535	0.61775	0.0567
0.6846	0.28555	0.74135	19.4818	6.0193	13.5	0.98245	0.0693	0.42845	0.22655	0.72035	42.1641	24.585	33.4803	12.5007	22.3741	12.5916	0.772	0.64425	0.0176
0.7634	0.1855	0.695	34.6217	11.4204	3	0.66705	0.0749	0.4426	0.24125	0.85005	49.2717	28.7853	39.2456	13.9894	26.3017	14.236	0.6094	0.4819	0.04465
0.7599	0.2379	0.76535	96.6245	9.26155	3.5	0.66545	0.0822	0.4365	0.22225	0.7209	44.1611	26.2919	34.3696	12.1441	24.9112	12.4041	0.6457	0.5207	0.0313
0.767	0.16335	0.88325	29.6969	8.9687	4.5	0.90625	0.0954	0.3205	0.20445	0.66845	35.2529	20.6657	27.4106	11.3831	19.0218	11.9901	0.59215	0.44065	0.04735
0.7814	0.388	0.8656	97.8726	7.00415	6.5	0.5879	0.0816	0.41765	0.31295	0.85635	54.9204	32.9128	40.3887	19.4732	31.7129	19.5091	0.7667	0.62955	0.0393
0.8351	0.1659	0.88815	10.9517	6.7521	9	1.49545	0.19585	0.30045	0.15425	0.49625	15.6928	9.2896	12.4103	4.06535	8.7015	4.19675	0.9593	0.92845	0.1858
0.8746	0.31685	0.76665	152.6	7.83	1	0.56225	0.0783	0.44655	0.26395	0.92325	45.0397	26.5815	35.3128	12.9908	24.755	13.1435	0.60395	0.46095	0.0164
0.7957	0.2706	0.7741	35.949	8.9783	10.5	0.65885	0.0886	0.42195	0.29305	0.73175	66.739	40.1427	49.7867	21.6836	38.7968	21.8259	0.77695	0.87845	0.0504
0.6882	0.34715	0.80995	53.7139	6.9979	8	0.6133	0.10205	0.4023	0.207	0.77985	50.4181	30.0908	38.1178	16.1091	28.8008	17.1127	0.73695	0.7275	0.06055
0.8495	0.21565	0.86255	27.3494	7.49805	9	0.8315	0.0856	0.527	0.58985	0.53325	126.807	73.5694	104.23	27.2257	66.8957	27.6379	0.7341	0.5566	0.05005
0.7312	0.28715	0.7903	21.4376	6.7737	13.5	0.8612	0.11305	0.3086	0.15155	0.57025	33.6875	20.2373	25.1411	10.4948	19.8133	13.2797	0.8578	0.7251	0.11475
0.7563	0.3099	0.69365	30.9605	7.4556	10.5	0.74955	0.15585	0.28055	0.54295	0.5793	135.823	83.4569	97.461	42.9108	84.1935	58.0079	0.8171	0.85095	0.05785
0.8029	0.29475	0.8429	82.5457	7.8416	2	0.599	0.07265	0.6045	0.61205	0.8782	125.191	69.4203	108.661	18.9115	59.228	19.4581	0.7091	0.60275	0.0504
0.7276	0.32295	0.78715	49.9093	5.07395	7.5	0.84885	0.12295	0.2651	0.36185	0.63265	75.425	45.8757	55.4475	23.7108	45.3017	30.1562	0.7326	0.6834	0.0142
0.7849	0.33525	0.8321	27.8566	5.2762	10.5	0.88645	0.10325	0.40335	0.2417	0.6354	50.8715	30.3895	39.6837	12.721	29.1578	14.7408	0.80575	0.80895	0.0859
0.6989	0.3471	0.8436	31.1031	6.5471	13	0.76805	0.10655	0.4238	0.20175	0.5864	46.4066	27.7386	35.4995	13.8188	26.5027	14.622	0.81805	0.90125	0.05565
0.7814	0.2846	0.7169	36.8972	5.47885	4	0.9031	0.08895	0.45635	0.4622	0.79645	96.1927	55.4528	79.9558	18.5148	50.1712	24.9802	0.71875	0.6203	0.0181
0.7133	0.26595	0.77155	25.6379	7.0654	11	0.87415	0.0851	0.63715	0.4919	0.6245	131.897	77.1517	106.695	31.0507	71.0539	31.0692	0.75185	0.6973	0.0459

## Sheet: CorrelationDataAdjustedPvalue
Variable	Correlation	P_Value	Adj_P_Value
Average object areas.cor	0.326216	0.0171313	0.246989
Eccentricity.cor	0.29671	0.0309734	0.246989
Blue Contrast.cor	0.250108	0.070884	0.246989
Brightness.cor	0.244231	0.0779966	0.246989
Red contrast.cor	0.212485	0.126629	0.253446
Euclidean Distance.cor	0.212477	0.126643	0.253446
Intensity Contrast.cor	0.212062	0.127404	0.253446
Green Contrst.cor	0.203131	0.144617	0.253446
Yellow Contrast.cor	0.202089	0.146732	0.253446
Peak Length.cor	0.125899	0.369035	0.500834
Symmetry.cor	0.0797471	0.570287	0.682022
Hue.cor	0.0604291	0.667317	0.70439
normalized offset.cor	0.0330581	0.814215	0.814215
perimeter/area.cor	-0.0716371	0.61023	0.682022
Saturation.cor	-0.0731722	0.602577	0.682022
Centrality Ratio.cor	-0.154452	0.269481	0.393857
Fractional Area.cor	-0.157661	0.259535	0.393857
Objects.cor	-0.256572	0.0636658	0.246989
Occupation Factor.cor	-0.27565	0.045738	0.246989

## Sheet: FigureData
Variable	Correlation	P_Value	Adj_P_Value		Measure	Correlation
Average object areas.cor	0.326216	0.0171313	0.246989		Occupation Factor	-0.27565
Eccentricity.cor	0.29671	0.0309734	0.246989		Objects	-0.256572
Blue Contrast.cor	0.250108	0.070884	0.246989		Fractional Area	-0.157661
Brightness.cor	0.244231	0.0779966	0.246989		Centrality Ratio	-0.154452
Red contrast.cor	0.212485	0.126629	0.253446		Saturation	-0.0731722
Euclidean Distance.cor	0.212477	0.126643	0.253446		Perimeter/Area	-0.0716371
Intensity Contrast.cor	0.212062	0.127404	0.253446		Normalized Offset	0.0330581
Green Contrst.cor	0.203131	0.144617	0.253446		Hue	0.0604291
Yellow Contrast.cor	0.202089	0.146732	0.253446		Symmetry	0.0797471
Peak Length.cor	0.125899	0.369035	0.500834		Peak Length	0.125899
Symmetry.cor	0.0797471	0.570287	0.682022		Yellow Contrast	0.202089
Hue.cor	0.0604291	0.667317	0.70439		Green Contrast	0.203131
normalized offset.cor	0.0330581	0.814215	0.814215		Intensity Contrast	0.212062
perimeter/area.cor	-0.0716371	0.61023	0.682022		Euclidean Distance	0.212477
Saturation.cor	-0.0731722	0.602577	0.682022		Red Contrast	0.212485
Centrality Ratio.cor	-0.154452	0.269481	0.393857		Brightness	0.244231
Fractional Area.cor	-0.157661	0.259535	0.393857		Blue Contrast	0.250108
Objects.cor	-0.256572	0.0636658	0.246989		Eccentricity	0.29671
Occupation Factor.cor	-0.27565	0.045738	0.246989		Average Object Areas	0.326216

## Sheet: WithIDs
Consensus Score	Fractional Area	Eccentricity	Average object areas	Peak Length	Objects	perimeter/area	Hue	Saturation	Brightness	Symmetry	Euclidean Distance	Intensity Contrast	Red contrast	Blue Contrast	Green Contrst	Yellow Contrast	Centrality Ratio	Occupation Factor	normalized offset	Turtle	ID
0.8136	0.401	0.8432	213.939	7.8052	1	0.53895	0.0698	0.46425	0.34225	0.91855	60.987	35.7234	47.8593	18.6891	32.8517	18.7227	0.83065	0.6901	0.0068	1093	17923
0.6953	0.3634	0.83035	39.8152	6.375	15	0.83315	0.06955	0.37465	0.18805	0.7058	21.7959	12.4709	18.0759	5.1691	11.0258	5.3331	0.8525	0.92945	0.0199	1011	20544
0.8423	0.3692	0.92405	107.228	8.60895	11.5	0.46885	0.08195	0.5609	0.41265	0.94495	96.9669	57.6523	75.5867	26.7364	54.523	26.8747	0.6591	0.6007	0.03855	1117	22468
0.7491	0.3906	0.77635	36.1628	6.37725	21.5	0.7658	0.07195	0.6963	0.20265	0.62525	33.8404	18.3084	30.0087	1.7196	15.5457	2.1375	0.97385	0.9564	0.0367	1042	22609
0.6918	0.2679	0.7905	24.1302	5.9232	12.5	1.02095	0.0729	0.40335	0.2266	0.60975	23.1537	13.2632	19.1056	5.7624	11.738	5.86415	0.81795	0.79185	0.02125	1070	22612
0.724	0.2799	0.81105	30.8775	6.45775	8.5	0.91625	0.0877	0.359	0.1909	0.55675	27.7187	16.309	21.1089	9.68045	15.1333	9.80735	0.78825	0.73945	0.1523	1061	22613
0.6989	0.30125	0.82355	42.3922	7.37715	10.5	0.73695	0.05975	0.6842	0.2232	0.76045	28.2044	12.3923	26.3929	-4.96195	8.61535	-3.5335	0.75945	0.7017	0.0529	1141	22614
0.7419	0.30615	0.8447	22.2194	6.1391	16	0.99575	0.08485	0.3705	0.2038	0.66515	24.6337	14.9537	18.2657	7.5531	14.7015	7.612	0.9184	0.99195	0.07525	1148	27761
0.7133	0.3416	0.5623	64.7126	8.4314	5	0.65205	0.0777	0.4671	0.2478	0.7708	44.6188	26.6211	34.6646	12.1828	25.3126	12.2331	0.71155	0.73755	0.0296	1139	36684
0.7204	0.3133	0.7666	50.8535	7.4375	7	0.7231	0.0633	0.54085	0.15715	0.79285	33.3616	19.1125	27.6579	7.7587	16.9637	8.00275	0.7711	0.75525	0.083	1097	42824
0.7133	0.34235	0.7929	67.859	9.9768	8	0.5147	0.09265	0.7103	0.4317	0.7604	95.6368	57.3782	75.618	17.7605	55.7874	17.9766	0.7439	0.6756	0.02255	1009	42825
0.7563	0.3774	0.75795	80.3152	9.0685	6	0.5611	0.09605	0.7144	0.2311	0.7298	58.4419	34.9098	46.5713	10.6836	33.6516	10.7981	0.90595	0.87455	0.0282	1134	45769
0.7885	0.23865	0.7582	37.6182	8.38155	6	0.74025	0.07985	0.40175	0.2083	0.78645	30.4272	17.7219	24.674	7.4443	16.1721	7.58435	0.729	0.5767	0.04035	1001	45779
0.7921	0.23275	0.71805	45.1501	10.0951	6	0.5995	0.09195	0.69675	0.33805	0.80695	83.2042	49.8219	65.9804	15.7632	48.177	16.1587	0.69225	0.70305	0.05285	1112	49607
0.724	0.2989	0.7635	29.9835	7.67165	16	0.7342	0.08875	0.69655	0.1951	0.6193	47.5358	28.2822	38.0673	8.9524	27.0256	9.01885	0.86645	0.80755	0.02515	1095	52615
0.81	0.2965	0.76025	20.9885	6.56155	5	0.91815	0.07095	0.52415	0.2528	0.5803	56.2979	33.1361	44.2324	16.4496	30.6923	16.5002	0.9764	0.89275	0.06005	1136	65908
0.6667	0.345	0.6545	45.3609	6.92235	4.5	0.83035	0.0636	0.4884	0.30215	0.8006	36.6606	21.2003	29.8835	9.2735	19.1031	9.28955	0.80795	0.8006	0.1076	1116	139661
0.7957	0.19815	0.7577	16.9828	7.9568	6	0.91785	0.06785	0.468	0.302	0.6723	47.3193	27.9089	37.1247	13.6029	25.994	13.6253	0.5695	0.4719	0.0257	1015	141485
0.7993	0.26535	0.84315	25.7608	6.5567	10	0.9064	0.0895	0.46315	0.427	0.6932	106.347	64.6098	76.7648	36.5615	63.8698	36.6504	0.7717	0.71115	0.0193	1137	203066
0.7455	0.21805	0.81265	45.4819	9.34155	7	0.70685	0.08455	0.4032	0.23675	0.7412	48.5709	29.2023	36.6453	14.9154	28.1724	15.1733	0.6572	0.55615	0.04445	1033	203309
0.6989	0.4066	0.8135	55.8184	5.11155	9	0.83015	0.05405	0.5044	0.2035	0.73445	23.0799	12.9931	19.692	4.22535	11.2709	4.2505	0.92275	0.95365	0.0291	1078	288185
0.7706	0.3191	0.8792	67.3126	8.2748	7.5	0.6038	0.06575	0.3766	0.16755	0.78155	20.9997	11.9908	17.4438	5.0593	10.5361	5.1701	0.74485	0.6687	0.0773	1125	288186
0.724	0.2241	0.75225	17.2043	6.67125	7.5	1.0264	0.11365	0.327	0.1457	0.66265	15.3601	8.714	12.7642	3.99935	7.5501	4.19425	0.7415	0.87175	0.0313	1007	288187
0.7025	0.2911	0.69215	40.1499	7.67285	9	0.7314	0.08495	0.3844	0.17365	0.7326	19.4781	10.8449	16.7043	4.0102	9.17315	4.1298	0.7127	0.64585	0.0557	1080	288189
0.7419	0.2254	0.7967	28.3449	8.6134	14.5	0.84205	0.0886	0.4055	0.1707	0.6282	29.1647	17.2425	22.7588	8.54505	16.1112	8.72375	0.91455	0.8028	0.0705	1058	288199
0.7706	0.3171	0.7846	24.575	6.4343	19.5	0.92125	0.06775	0.4389	0.15085	0.46695	20.888	11.9236	17.4304	4.6955	10.5075	4.8192	0.9727	0.9262	0.0583	1091	288210
0.7993	0.30055	0.7757	71.4333	9.03845	7	0.5932	0.06515	0.4874	0.2254	0.7698	39.3381	22.5382	32.3708	10.1594	19.9099	10.2001	0.69885	0.6322	0.0316	1079	324296
0.8065	0.2675	0.7555	96.7058	9.2851	3	0.55605	0.08055	0.4164	0.2894	0.763	62.2163	37.1077	47.4732	19.3102	35.2745	19.6568	0.5685	0.51165	0.02985	1158	326308
0.7885	0.26535	0.7288	22.9656	7.78595	18	0.8099	0.0796	0.3355	0.2265	0.62715	26.6831	15.6026	21.2963	7.37715	14.283	7.4793	0.78285	0.82635	0.03365	1087	497193
0.8172	0.36205	0.79145	47.4912	6.07325	7.5	0.70905	0.0587	0.4741	0.194	0.59115	27.8652	15.8126	23.3498	6.4052	13.7869	6.47915	0.7911	0.8359	0.05665	1156	497202
0.7491	0.15025	0.7799	25.5567	9.3527	8	0.8795	0.0869	0.30035	0.1771	0.7213	25.8281	14.9659	20.4117	8.33275	13.454	8.55235	0.6153	0.4144	0.06655	1106	497203
0.853	0.27235	0.8083	19.7738	5.19065	16	1.0468	0.0858	0.2819	0.18165	0.50275	22.6604	13.3734	17.054	8.1772	12.4809	8.3139	0.8698	0.77845	0.0991	1099	497237
0.7814	0.20355	0.7499	29.3678	8.41035	7	0.9107	0.07775	0.38495	0.1946	0.66785	29.6227	17.0793	24.2626	7.443	15.2755	8.00185	0.6598	0.6129	0.03665	1002	497243
0.7993	0.35825	0.747	60.4491	7.2772	8	0.65785	0.07435	0.41485	0.2196	0.7511	42.183	24.6156	33.4575	12.4886	22.4488	12.9159	0.8441	0.76865	0.0511	1053	497248
0.8495	0.3193	0.8246	93.2035	6.5739	4	0.78275	0.06825	0.4158	0.26515	0.7728	42.098	24.5027	33.5151	12.4187	22.2429	12.4657	0.74535	0.61775	0.0567	1147	497251
0.6846	0.28555	0.74135	19.4818	6.0193	13.5	0.98245	0.0693	0.42845	0.22655	0.72035	42.1641	24.585	33.4803	12.5007	22.3741	12.5916	0.772	0.64425	0.0176	1115	497252
0.7634	0.1855	0.695	34.6217	11.4204	3	0.66705	0.0749	0.4426	0.24125	0.85005	49.2717	28.7853	39.2456	13.9894	26.3017	14.236	0.6094	0.4819	0.04465	1055	497261
0.7599	0.2379	0.76535	96.6245	9.26155	3.5	0.66545	0.0822	0.4365	0.22225	0.7209	44.1611	26.2919	34.3696	12.1441	24.9112	12.4041	0.6457	0.5207	0.0313	1109	497272
0.767	0.16335	0.88325	29.6969	8.9687	4.5	0.90625	0.0954	0.3205	0.20445	0.66845	35.2529	20.6657	27.4106	11.3831	19.0218	11.9901	0.59215	0.44065	0.04735	1160	497276
0.7814	0.388	0.8656	97.8726	7.00415	6.5	0.5879	0.0816	0.41765	0.31295	0.85635	54.9204	32.9128	40.3887	19.4732	31.7129	19.5091	0.7667	0.62955	0.0393	1030	497302
0.8351	0.1659	0.88815	10.9517	6.7521	9	1.49545	0.19585	0.30045	0.15425	0.49625	15.6928	9.2896	12.4103	4.06535	8.7015	4.19675	0.9593	0.92845	0.1858	1121	519611
0.8746	0.31685	0.76665	152.6	7.83	1	0.56225	0.0783	0.44655	0.26395	0.92325	45.0397	26.5815	35.3128	12.9908	24.755	13.1435	0.60395	0.46095	0.0164	1014	519622
0.7957	0.2706	0.7741	35.949	8.9783	10.5	0.65885	0.0886	0.42195	0.29305	0.73175	66.739	40.1427	49.7867	21.6836	38.7968	21.8259	0.77695	0.87845	0.0504	1038	575054
0.6882	0.34715	0.80995	53.7139	6.9979	8	0.6133	0.10205	0.4023	0.207	0.77985	50.4181	30.0908	38.1178	16.1091	28.8008	17.1127	0.73695	0.7275	0.06055	1081	mn1
0.8495	0.21565	0.86255	27.3494	7.49805	9	0.8315	0.0856	0.527	0.58985	0.53325	126.807	73.5694	104.23	27.2257	66.8957	27.6379	0.7341	0.5566	0.05005	1034	mn2
0.7312	0.28715	0.7903	21.4376	6.7737	13.5	0.8612	0.11305	0.3086	0.15155	0.57025	33.6875	20.2373	25.1411	10.4948	19.8133	13.2797	0.8578	0.7251	0.11475	1140	mn3
0.7563	0.3099	0.69365	30.9605	7.4556	10.5	0.74955	0.15585	0.28055	0.54295	0.5793	135.823	83.4569	97.461	42.9108	84.1935	58.0079	0.8171	0.85095	0.05785	1146	mn8
0.8029	0.29475	0.8429	82.5457	7.8416	2	0.599	0.07265	0.6045	0.61205	0.8782	125.191	69.4203	108.661	18.9115	59.228	19.4581	0.7091	0.60275	0.0504	1129	mn9
0.7276	0.32295	0.78715	49.9093	5.07395	7.5	0.84885	0.12295	0.2651	0.36185	0.63265	75.425	45.8757	55.4475	23.7108	45.3017	30.1562	0.7326	0.6834	0.0142	1135	mn10
0.7849	0.33525	0.8321	27.8566	5.2762	10.5	0.88645	0.10325	0.40335	0.2417	0.6354	50.8715	30.3895	39.6837	12.721	29.1578	14.7408	0.80575	0.80895	0.0859	1044	mn14
0.6989	0.3471	0.8436	31.1031	6.5471	13	0.76805	0.10655	0.4238	0.20175	0.5864	46.4066	27.7386	35.4995	13.8188	26.5027	14.622	0.81805	0.90125	0.05565	1084	mn15
0.7814	0.2846	0.7169	36.8972	5.47885	4	0.9031	0.08895	0.45635	0.4622	0.79645	96.1927	55.4528	79.9558	18.5148	50.1712	24.9802	0.71875	0.6203	0.0181	1065	mn16
0.7133	0.26595	0.77155	25.6379	7.0654	11	0.87415	0.0851	0.63715	0.4919	0.6245	131.897	77.1517	106.695	31.0507	71.0539	31.0692	0.75185	0.6973	0.0459	1138	mn2i
