# Supplementary material for: New approaches for capturing and estimating variation in complex animal color patterns from digital photographs: application to the Eastern Box Turtle (Terrapene carolina)
Source: PeerJ journal article supplement (doi:10.7717/peerj.19690), 2025-07-21
Supplement: PeerJ_All_DataAnalysisFiles.zip [file PeerJ_Data_SmithsonianVsField_Variation_Table3.xlsx]

## Sheet: Table
Pattern Measurement	Top View	Right View	Left View	Front View	Back View		Fractional Area
Fractional Area
Museum Vs. Field T-Test, p-value	T(42,11)=-0.07, p=0.94	T(42,11)=0.72, p=0.48	T(42,11)=-0.14, p=0.89	T(42,11)=-0.30, p=0.77	T(42,11)=0.72, p=0.48
Museum Vs. Field F-Test, p-value	F(42,11)=2.19, p=0.16	F(42,11)=1.29, p=0.53	F(42,11)=1.12, p=0.74	F(42,11)=2.42, p=0.04	F(42,11)=1.31, p=0.51
Museum Vs. Field CV diff., p-value	F(42,11)=2.63, p=0.02	F(42,11)=2.26, p=0.29	F(42,11)=3.02, p=0.03	F(42,11)=1.98, p=0.04	F(42,11)=1.77, p=0.03		Mean Eccentricity
Mean Eccentricity
Museum Vs. Field T-Test, p-value	T(42,11)=-0.41, p=0.69	T(42,11)=1.28, p=0.22	T(42,11)=1.30, p=0.21	T(42,11)=-1.07, p=0.29	T(42,11)=0.56, p=0.59
Museum Vs. Field F-Test, p-value	F(42,11)=1.55, p=0.44	F(42,11)=1.81, p=0.16	F(42,11)=1.34, p=0.47	F(42,11)=2.26, p=0.15	F(42,11)=1.27, p=0.55
Museum Vs. Field CV diff., p-value	F(42,11)=7.71, p=0.00	F(42,11)=2.11, p=0.33	F(42,11)=2.24, p=0.13	F(42,11)=1.55, p=0.27	F(42,11)=1.54, p=0.39		Peak Length
Peak Length
Museum Vs. Field T-Test, p-value	T(42,11)=2.85, p=0.01	T(42,11)=-2.43, p=0.03	T(42,11)=-1.72, p=0.11	T(42,11)=-0.20, p=0.85	T(42,11)=-1.27, p=0.22
Museum Vs. Field F-Test, p-value	F(42,11)=1.83, p=0.28	F(42,11)=4.78, p=0.00	F(42,11)=2.05, p=0.09	F(42,11)=2.24, p=0.06	F(42,11)=2.42, p=0.04
Museum Vs. Field CV diff., p-value	F(42,11)=15.87, p=0.00	F(42,11)=1.80, p=0.18	F(42,11)=1.87, p=0.15	F(42,11)=1.12, p=0.53	F(42,11)=5.01, p=0.38		Perimeter Divided Area
Perimeter Divided Area
Museum Vs. Field T-Test, p-value	T(42,11)=-0.70, p=0.49	T(42,11)=2.80, p=0.01	T(42,11)=2.12, p=0.05	T(42,11)=0.70, p=0.49	T(42,11)=1.54, p=0.14
Museum Vs. Field F-Test, p-value	F(42,11)=3.21, p=0.04	F(42,11)=1.39, p=0.58	F(42,11)=1.06, p=0.99	F(42,11)=1.14, p=0.72	F(42,11)=1.01, p=0.90
Museum Vs. Field CV diff., p-value	F(42,11)=10.24, p=0.00	F(42,11)=2.55, p=0.53	F(42,11)=1.16, p=0.79	F(42,11)=14.12, p=0.00	F(42,11)=1.33, p=0.85		Hue
Hue
Museum Vs. Field T-Test, p-value	T(42,11)=-3.17, p=0.01	T(42,11)=-2.64, p=0.02	T(42,11)=-2.68, p=0.02	T(42,11)=-2.61, p=0.02	T(42,11)=-1.92, p=0.08
Museum Vs. Field F-Test, p-value	F(42,11)=1.02, p=0.89	F(42,11)=10.03, p=0.00	F(42,11)=11.37, p=0.00	F(42,11)=10.54, p=0.00	F(42,11)=9.50, p=0.00
Museum Vs. Field CV diff., p-value	F(42,11)=13.76, p=0.00	F(42,11)=3.56, p=0.03	F(42,11)=1.95, p=0.01	F(42,11)=11.12, p=0.00	F(42,11)=4.24, p=0.06		Saturation
Saturation
Museum Vs. Field T-Test, p-value	T(42,11)=-0.21, p=0.83	T(42,11)=1.47, p=0.16	T(42,11)=1.79, p=0.09	T(42,11)=1.02, p=0.33	T(42,11)=0.62, p=0.54
Museum Vs. Field F-Test, p-value	F(42,11)=1.51, p=0.33	F(42,11)=2.29, p=0.05	F(42,11)=2.20, p=0.07	F(42,11)=6.62, p=0.00	F(42,11)=3.21, p=0.01
Museum Vs. Field CV diff., p-value	F(42,11)=2.78, p=0.50	F(42,11)=9.65, p=0.00	F(42,11)=1.79, p=0.63	F(42,11)=3.47, p=0.02	F(42,11)=3.19, p=0.24		Brightness
Brightness
Museum Vs. Field T-Test, p-value	T(42,11)=-3.46, p=0.00	T(42,11)=1.33, p=0.21	T(42,11)=1.46, p=0.17	T(42,11)=1.07, p=0.30	T(42,11)=2.34, p=0.04
Museum Vs. Field F-Test, p-value	F(42,11)=5.60, p=0.00	F(42,11)=3.36, p=0.00	F(42,11)=3.49, p=0.00	F(42,11)=1.37, p=0.59	F(42,11)=2.94, p=0.01
Museum Vs. Field CV diff., p-value	F(42,11)=32.11, p=0.00	F(42,11)=2.28, p=0.08	F(42,11)=1.66, p=0.01	F(42,11)=1.20, p=0.76	F(42,11)=13.22, p=0.01		Symmetry
Symmetry
Museum Vs. Field T-Test, p-value	T(42,11)=1.64, p=0.12	T(42,11)=0.61, p=0.55	T(42,11)=-0.58, p=0.57	T(42,11)=1.25, p=0.22	T(42,11)=-0.87, p=0.39
Museum Vs. Field F-Test, p-value	F(42,11)=1.03, p=0.97	F(42,11)=1.26, p=0.56	F(42,11)=1.01, p=0.91	F(42,11)=1.44, p=0.52	F(42,11)=1.84, p=0.27
Museum Vs. Field CV diff., p-value	F(42,11)=3.12, p=0.83	F(42,11)=1.08, p=0.01	F(42,11)=2.03, p=0.33	F(42,11)=3.41, p=0.84	F(42,11)=4.50, p=0.99		Euclidean Distance
Euclidean Distance
Museum Vs. Field T-Test, p-value	T(42,11)=-4.28, p=0.00	T(42,11)=-1.32, p=0.21	T(42,11)=-0.63, p=0.54	T(42,11)=-1.04, p=0.32	T(42,11)=0.60, p=0.56
Museum Vs. Field F-Test, p-value	F(42,11)=2.97, p=0.01	F(42,11)=2.37, p=0.04	F(42,11)=2.95, p=0.01	F(42,11)=2.28, p=0.06	F(42,11)=2.52, p=0.03
Museum Vs. Field CV diff., p-value	F(42,11)=28.96, p=0.00	F(42,11)=2.26, p=0.58	F(42,11)=1.16, p=0.00	F(42,11)=1.15, p=0.15	F(42,11)=10.58, p=0.81		Intensity Contrast
Intensity Contrast
Museum Vs. Field T-Test, p-value	T(42,11)=-4.30, p=0.00	T(42,11)=-0.90, p=0.38	T(42,11)=-0.87, p=0.40	T(42,11)=-0.91, p=0.38	T(42,11)=0.70, p=0.50
Museum Vs. Field F-Test, p-value	F(42,11)=2.60, p=0.03	F(42,11)=2.63, p=0.02	F(42,11)=1.61, p=0.26	F(42,11)=1.98, p=0.11	F(42,11)=2.27, p=0.06
Museum Vs. Field CV diff., p-value	F(42,11)=30.94, p=0.00	F(42,11)=2.16, p=0.25	F(42,11)=1.35, p=0.06	F(42,11)=1.15, p=0.13	F(42,11)=11.17, p=0.66		Number of Objects
Number of Objects
Museum Vs. Field T-Test, p-value	T(42,11)=-0.17, p=0.87	T(42,11)=-0.87, p=0.39	T(42,11)=-0.90, p=0.38	T(42,11)=-0.59, p=0.56	T(42,11)=1.67, p=0.10
Museum Vs. Field F-Test, p-value	F(42,11)=2.11, p=0.18	F(42,11)=1.62, p=0.39	F(42,11)=1.15, p=0.70	F(42,11)=1.47, p=0.36	F(42,11)=7.02, p=0.00
Museum Vs. Field CV diff., p-value	F(42,11)=5.25, p=0.00	F(42,11)=1.82, p=0.91	F(42,11)=1.37, p=0.13	F(42,11)=1.30, p=0.48	F(42,11)=2.68, p=0.12		Average Area of Objects
Average Area of Objects
Museum Vs. Field T-Test, p-value	T(42,11)=1.91, p=0.06	T(42,11)=-1.38, p=0.18	T(42,11)=0.12, p=0.91	T(42,11)=0.00, p=1.00	T(42,11)=0.25, p=0.81
Museum Vs. Field F-Test, p-value	F(42,11)=5.10, p=0.01	F(42,11)=1.96, p=0.23	F(42,11)=3.62, p=0.03	F(42,11)=2.07, p=0.19	F(42,11)=1.47, p=0.50
Museum Vs. Field CV diff., p-value	F(42,11)=24.11, p=0.00	F(42,11)=2.97, p=0.94	F(42,11)=4.43, p=0.85	F(42,11)=4.51, p=0.02	F(42,11)=4.77, p=0.19		Red Contrast
Red Contrast
Museum Vs. Field T-Test, p-value	T(42,11)=-4.17, p=0.00	T(42,11)=-1.05, p=0.31	T(42,11)=-0.90, p=0.39	T(42,11)=-1.27, p=0.23	T(42,11)=0.44, p=0.67
Museum Vs. Field F-Test, p-value	F(42,11)=3.80, p=0.00	F(42,11)=3.96, p=0.00	F(42,11)=2.84, p=0.01	F(42,11)=2.66, p=0.02	F(42,11)=3.13, p=0.01
Museum Vs. Field CV diff., p-value	F(42,11)=30.23, p=0.00	F(42,11)=2.56, p=0.91	F(42,11)=1.10, p=0.00	F(42,11)=1.14, p=0.70	F(42,11)=9.50, p=0.97		Peak Length
Peak Length
Museum Vs. Field T-Test, p-value	T(42,11)=2.85, p=0.01	T(42,11)=-2.43, p=0.03	T(42,11)=-1.72, p=0.11	T(42,11)=-0.20, p=0.85	T(42,11)=-1.27, p=0.22
Museum Vs. Field F-Test, p-value	F(42,11)=1.83, p=0.28	F(42,11)=4.78, p=0.00	F(42,11)=2.05, p=0.09	F(42,11)=2.24, p=0.06	F(42,11)=2.42, p=0.04
Museum Vs. Field CV diff., p-value	F(42,11)=15.87, p=0.00	F(42,11)=1.80, p=0.18	F(42,11)=1.87, p=0.15	F(42,11)=1.12, p=0.53	F(42,11)=5.01, p=0.38		Blue Contrast
Blue Contrast
Museum Vs. Field T-Test, p-value	T(42,11)=-1.71, p=0.11	T(42,11)=-0.33, p=0.75	T(42,11)=-0.71, p=0.49	T(42,11)=0.03, p=0.97	T(42,11)=1.17, p=0.26
Museum Vs. Field F-Test, p-value	F(42,11)=3.38, p=0.00	F(42,11)=1.23, p=0.60	F(42,11)=2.25, p=0.15	F(42,11)=1.21, p=0.77	F(42,11)=1.11, p=0.76
Museum Vs. Field CV diff., p-value	F(42,11)=8.87, p=0.02	F(42,11)=2.73, p=0.03	F(42,11)=2.06, p=0.00	F(42,11)=2.37, p=0.02	F(42,11)=3.74, p=0.08		Green Contrast
Green Contrast
Museum Vs. Field T-Test, p-value	T(42,11)=-4.31, p=0.00	T(42,11)=-0.85, p=0.41	T(42,11)=-0.85, p=0.41	T(42,11)=-0.75, p=0.46	T(42,11)=0.83, p=0.42
Museum Vs. Field F-Test, p-value	F(42,11)=2.28, p=0.05	F(42,11)=2.22, p=0.06	F(42,11)=1.27, p=0.55	F(42,11)=1.74, p=0.20	F(42,11)=1.90, p=0.13
Museum Vs. Field CV diff., p-value	F(42,11)=33.41, p=0.00	F(42,11)=1.81, p=0.02	F(42,11)=1.83, p=0.38	F(42,11)=1.23, p=0.09	F(42,11)=13.19, p=0.00		Yellow Contrast
Yellow Contrast
Museum Vs. Field T-Test, p-value	T(42,11)=-2.42, p=0.03	T(42,11)=-1.47, p=0.16	T(42,11)=-1.91, p=0.07	T(42,11)=-1.50, p=0.15	T(42,11)=0.75, p=0.46
Museum Vs. Field F-Test, p-value	F(42,11)=4.24, p=0.00	F(42,11)=1.02, p=0.90	F(42,11)=2.66, p=0.08	F(42,11)=1.18, p=0.81	F(42,11)=1.08, p=0.80
Museum Vs. Field CV diff., p-value	F(42,11)=45.00, p=0.00	F(42,11)=1.04, p=0.02	F(42,11)=1.55, p=0.51	F(42,11)=3.59, p=0.23	F(42,11)=3.33, p=0.15		Centrality Ratio
Centrality Ratio
Museum Vs. Field T-Test, p-value	T(42,11)=0.19, p=0.85	T(42,11)=1.18, p=0.25	T(42,11)=1.15, p=0.26	T(42,11)=-0.77, p=0.45	T(42,11)=0.87, p=0.40
Museum Vs. Field F-Test, p-value	F(42,11)=5.89, p=0.00	F(42,11)=1.87, p=0.26	F(42,11)=2.30, p=0.14	F(42,11)=1.67, p=0.36	F(42,11)=1.10, p=0.76
Museum Vs. Field CV diff., p-value	F(42,11)=7.00, p=0.00	F(42,11)=1.05, p=0.93	F(42,11)=2.96, p=0.05	F(42,11)=3.45, p=0.02	F(42,11)=34.43, p=0.00		Occupation Factor
Occupation Factor
Museum Vs. Field T-Test, p-value	T(42,11)=0.02, p=0.99	T(42,11)=0.59, p=0.57	T(42,11)=-0.35, p=0.73	T(42,11)=-0.06, p=0.95	T(42,11)=0.14, p=0.94
Museum Vs. Field F-Test, p-value	F(42,11)=2.38, p=0.12	F(42,11)=1.60, p=0.27	F(42,11)=1.26, p=0.56	F(42,11)=1.36, p=0.46	F(42,11)=1.18, p=0.67
Museum Vs. Field CV diff., p-value	F(42,11)=2.95, p=0.00	F(42,11)=1.07, p=0.10	F(42,11)=4.00, p=0.00	F(42,11)=3.71, p=0.00	F(42,11)=6.89, p=0.96		Normalized Offset
Normalized Offset
Museum Vs. Field T-Test, p-value	T(42,11)=-0.37, p=0.72	T(42,11)=0.42, p=0.68	T(42,11)=1.85, p=0.08	T(42,11)=0.59, p=0.57	T(42,11)=2.76, p=0.01
Museum Vs. Field F-Test, p-value	F(42,11)=1.68, p=0.36	F(42,11)=1.49, p=0.34	F(42,11)=1.00, p=0.93	F(42,11)=4.57, p=0.00	F(42,11)=2.30, p=0.14
Museum Vs. Field CV diff., p-value	F(42,11)=9.04, p=0.02	F(42,11)=1.46, p=0.01	F(42,11)=1.54, p=0.47	F(42,11)=6.02, p=0.67	F(42,11)=4.74, p=0.03

## Sheet: Table P-values
Pattern Measurement	Top View	Right View	Left View	Front View	Back View		Fractional Area
Fractional Area
Museum Vs. Field T-Test, p-value	0.94	0.48	0.89	0.77	0.48
Museum Vs. Field F-Test, p-value	0.16	0.53	0.74	0.04	0.51
Museum Vs. Field CV diff., p-value	0.02	0.29	0.03	0.04	0.03		Mean Eccentricity
Mean Eccentricity
Museum Vs. Field T-Test, p-value	0.69	0.22	0.21	0.29	0.59
Museum Vs. Field F-Test, p-value	0.44	0.16	0.47	0.15	0.55
Museum Vs. Field CV diff., p-value	0.00	0.33	0.13	0.27	0.39		Peak Length
Peak Length
Museum Vs. Field T-Test, p-value	0.01	0.03	0.11	0.85	0.22
Museum Vs. Field F-Test, p-value	0.28	0.00	0.09	0.06	0.04
Museum Vs. Field CV diff., p-value	0.00	0.18	0.15	0.53	0.38		Perimeter Divided Area
Perimeter Divided Area
Museum Vs. Field T-Test, p-value	0.49	0.01	0.05	0.49	0.14
Museum Vs. Field F-Test, p-value	0.04	0.58	0.99	0.72	0.90
Museum Vs. Field CV diff., p-value	0.00	0.53	0.79	0.00	0.85		Hue
Hue
Museum Vs. Field T-Test, p-value	0.01	0.02	0.02	0.02	0.08
Museum Vs. Field F-Test, p-value	0.89	0.00	0.00	0.00	0.00
Museum Vs. Field CV diff., p-value	0.00	0.03	0.01	0.00	0.06		Saturation
Saturation
Museum Vs. Field T-Test, p-value	0.83	0.16	0.09	0.33	0.54
Museum Vs. Field F-Test, p-value	0.33	0.05	0.07	0.00	0.01
Museum Vs. Field CV diff., p-value	0.50	0.00	0.63	0.02	0.24		Brightness
Brightness
Museum Vs. Field T-Test, p-value	0.00	0.21	0.17	0.30	0.04
Museum Vs. Field F-Test, p-value	0.00	0.00	0.00	0.59	0.01
Museum Vs. Field CV diff., p-value	0.00	0.08	0.01	0.76	0.01		Symmetry
Symmetry
Museum Vs. Field T-Test, p-value	0.12	0.55	0.57	0.22	0.39
Museum Vs. Field F-Test, p-value	0.97	0.56	0.91	0.52	0.27
Museum Vs. Field CV diff., p-value	0.83	0.01	0.33	0.84	0.99		Euclidean Distance
Euclidean Distance
Museum Vs. Field T-Test, p-value	0.00	0.21	0.54	0.32	0.56
Museum Vs. Field F-Test, p-value	0.01	0.04	0.01	0.06	0.03
Museum Vs. Field CV diff., p-value	0.00	0.58	0.00	0.15	0.81		Intensity Contrast
Intensity Contrast
Museum Vs. Field T-Test, p-value	0.00	0.38	0.40	0.38	0.50
Museum Vs. Field F-Test, p-value	0.03	0.02	0.26	0.11	0.06
Museum Vs. Field CV diff., p-value	0.00	0.25	0.06	0.13	0.66		Number of Objects
Number of Objects
Museum Vs. Field T-Test, p-value	0.87	0.39	0.38	0.56	0.10
Museum Vs. Field F-Test, p-value	0.18	0.39	0.70	0.36	0.00
Museum Vs. Field CV diff., p-value	0.00	0.91	0.13	0.48	0.12		Average Area of Objects
Average Area of Objects
Museum Vs. Field T-Test, p-value	0.06	0.18	0.91	1.00	0.81
Museum Vs. Field F-Test, p-value	0.01	0.23	0.03	0.19	0.50
Museum Vs. Field CV diff., p-value	0.00	0.94	0.85	0.02	0.19		Red Contrast
Red Contrast
Museum Vs. Field T-Test, p-value	0.00	0.31	0.39	0.23	0.67
Museum Vs. Field F-Test, p-value	0.00	0.00	0.01	0.02	0.01
Museum Vs. Field CV diff., p-value	0.00	0.91	0.00	0.70	0.97		Peak Length
Peak Length
Museum Vs. Field T-Test, p-value	0.01	0.03	0.11	0.85	0.22
Museum Vs. Field F-Test, p-value	0.28	0.00	0.09	0.06	0.04
Museum Vs. Field CV diff., p-value	0.00	0.18	0.15	0.53	0.38		Blue Contrast
Blue Contrast
Museum Vs. Field T-Test, p-value	0.11	0.75	0.49	0.97	0.26
Museum Vs. Field F-Test, p-value	0.00	0.60	0.15	0.77	0.76
Museum Vs. Field CV diff., p-value	0.02	0.03	0.00	0.02	0.08		Green Contrast
Green Contrast
Museum Vs. Field T-Test, p-value	0.00	0.41	0.41	0.46	0.42
Museum Vs. Field F-Test, p-value	0.05	0.06	0.55	0.20	0.13
Museum Vs. Field CV diff., p-value	0.00	0.02	0.38	0.09	0.00		Yellow Contrast
Yellow Contrast
Museum Vs. Field T-Test, p-value	0.03	0.16	0.07	0.15	0.46
Museum Vs. Field F-Test, p-value	0.00	0.90	0.08	0.81	0.80
Museum Vs. Field CV diff., p-value	0.00	0.02	0.51	0.23	0.15		Centrality Ratio
Centrality Ratio
Museum Vs. Field T-Test, p-value	0.85	0.25	0.26	0.45	0.40
Museum Vs. Field F-Test, p-value	0.00	0.26	0.14	0.36	0.76
Museum Vs. Field CV diff., p-value	0.00	0.93	0.05	0.02	0.00		Occupation Factor
Occupation Factor
Museum Vs. Field T-Test, p-value	0.99	0.57	0.73	0.95	0.94
Museum Vs. Field F-Test, p-value	0.12	0.27	0.56	0.46	0.67
Museum Vs. Field CV diff., p-value	0.00	0.10	0.00	0.00	0.96		Normalized Offset
Normalized Offset
Museum Vs. Field T-Test, p-value	0.72	0.68	0.08	0.57	0.01
Museum Vs. Field F-Test, p-value	0.36	0.34	0.93	0.00	0.14
Museum Vs. Field CV diff., p-value	0.02	0.01	0.47	0.67	0.03

## Sheet: Revised PeerJ Table
Pattern Measurement	Top View	Right View	Left View	Front View	Back View		Test Values
Fractional Area							Table Adjusted P-values
Museum Vs. Field T-Test, p-value	T(42,11)=-0.07, p=0.99	T(42,11)=0.72, p=0.60	T(42,11)=-0.14, p=0.91	T(42,11)=-0.30, p=1.00	T(42,11)=0.72, p=0.69
Museum Vs. Field F-Test, p-value	T(42,11)=2.19, p=0.27	T(42,11)=1.29, p=0.63	T(42,11)=1.12, p=0.87	T(42,11)=2.42, p=0.15	T(42,11)=1.31, p=0.73
Museum Vs. Field CV diff., p-value	T(42,11)=2.63, p=0.02	T(42,11)=2.26, p=0.45	T(42,11)=3.02, p=0.09	T(42,11)=1.98, p=0.10	T(42,11)=1.77, p=0.12		Mean Eccentricity
Mean Eccentricity
Museum Vs. Field T-Test, p-value	T(42,11)=-0.41, p=0.96	T(42,11)=1.28, p=0.44	T(42,11)=1.30, p=0.47	T(42,11)=-1.07, p=0.81	T(42,11)=0.56, p=0.69
Museum Vs. Field F-Test, p-value	T(42,11)=1.55, p=0.49	T(42,11)=1.81, p=0.32	T(42,11)=1.34, p=0.72	T(42,11)=2.26, p=0.30	T(42,11)=1.27, p=0.73
Museum Vs. Field CV diff., p-value	T(42,11)=7.71, p=0.00	T(42,11)=2.11, p=0.47	T(42,11)=2.24, p=0.23	T(42,11)=1.55, p=0.42	T(42,11)=1.54, p=0.56		Peak Length
Peak Length
Museum Vs. Field T-Test, p-value	T(42,11)=2.85, p=0.03	T(42,11)=-2.43, p=0.15	T(42,11)=-1.72, p=0.31	T(42,11)=-0.20, p=1.00	T(42,11)=-1.27, p=0.63
Museum Vs. Field F-Test, p-value	T(42,11)=1.83, p=0.37	T(42,11)=4.78, p=0.00	T(42,11)=2.05, p=0.20	T(42,11)=2.24, p=0.15	T(42,11)=2.42, p=0.10
Museum Vs. Field CV diff., p-value	T(42,11)=15.87, p=0.00	T(42,11)=1.80, p=0.33	T(42,11)=1.87, p=0.23	T(42,11)=1.12, p=0.66	T(42,11)=5.01, p=0.56		Perimeter Divided Area
Perimeter Divided Area
Museum Vs. Field T-Test, p-value	T(42,11)=-0.70, p=0.75	T(42,11)=2.80, p=0.15	T(42,11)=2.12, p=0.31	T(42,11)=0.70, p=0.81	T(42,11)=1.54, p=0.56
Museum Vs. Field F-Test, p-value	T(42,11)=3.21, p=0.09	T(42,11)=1.39, p=0.63	T(42,11)=1.06, p=0.99	T(42,11)=1.14, p=0.80	T(42,11)=1.01, p=0.90
Museum Vs. Field CV diff., p-value	T(42,11)=10.24, p=0.00	T(42,11)=2.55, p=0.71	T(42,11)=1.16, p=0.83	T(42,11)=14.12, p=0.00	T(42,11)=1.33, p=0.99		Hue
Hue
Museum Vs. Field T-Test, p-value	T(42,11)=-3.17, p=0.03	T(42,11)=-2.64, p=0.15	T(42,11)=-2.68, p=0.31	T(42,11)=-2.61, p=0.40	T(42,11)=-1.92, p=0.50
Museum Vs. Field F-Test, p-value	T(42,11)=1.02, p=0.94	T(42,11)=10.03, p=0.00	T(42,11)=11.37, p=0.00	T(42,11)=10.54, p=0.00	T(42,11)=9.50, p=0.00
Museum Vs. Field CV diff., p-value	T(42,11)=13.76, p=0.00	T(42,11)=3.56, p=0.09	T(42,11)=1.95, p=0.03	T(42,11)=11.12, p=0.00	T(42,11)=4.24, p=0.20		Saturation
Saturation
Museum Vs. Field T-Test, p-value	T(42,11)=-0.21, p=0.97	T(42,11)=1.47, p=0.44	T(42,11)=1.79, p=0.31	T(42,11)=1.02, p=0.81	T(42,11)=0.62, p=0.69
Museum Vs. Field F-Test, p-value	T(42,11)=1.51, p=0.41	T(42,11)=2.29, p=0.13	T(42,11)=2.20, p=0.20	T(42,11)=6.62, p=0.00	T(42,11)=3.21, p=0.04
Museum Vs. Field CV diff., p-value	T(42,11)=2.78, p=0.53	T(42,11)=9.65, p=0.00	T(42,11)=1.79, p=0.70	T(42,11)=3.47, p=0.06	T(42,11)=3.19, p=0.44		Brightness
Brightness
Museum Vs. Field T-Test, p-value	T(42,11)=-3.46, p=0.00	T(42,11)=1.33, p=0.44	T(42,11)=1.46, p=0.43	T(42,11)=1.07, p=0.81	T(42,11)=2.34, p=0.40
Museum Vs. Field F-Test, p-value	T(42,11)=5.60, p=0.00	T(42,11)=3.36, p=0.00	T(42,11)=3.49, p=0.00	T(42,11)=1.37, p=0.69	T(42,11)=2.94, p=0.04
Museum Vs. Field CV diff., p-value	T(42,11)=32.11, p=0.00	T(42,11)=2.28, p=0.20	T(42,11)=1.66, p=0.03	T(42,11)=1.20, p=0.80	T(42,11)=13.22, p=0.07		Symmetry
Symmetry
Museum Vs. Field T-Test, p-value	T(42,11)=1.64, p=0.20	T(42,11)=0.61, p=0.63	T(42,11)=-0.58, p=0.67	T(42,11)=1.25, p=0.81	T(42,11)=-0.87, p=0.69
Museum Vs. Field F-Test, p-value	T(42,11)=1.03, p=0.97	T(42,11)=1.26, p=0.63	T(42,11)=1.01, p=0.98	T(42,11)=1.44, p=0.65	T(42,11)=1.84, p=0.45
Museum Vs. Field CV diff., p-value	T(42,11)=3.12, p=0.83	T(42,11)=1.08, p=0.07	T(42,11)=2.03, p=0.47	T(42,11)=3.41, p=0.84	T(42,11)=4.50, p=0.99		Euclidean Distance
Euclidean Distance
Museum Vs. Field T-Test, p-value	T(42,11)=-4.28, p=0.00	T(42,11)=-1.32, p=0.44	T(42,11)=-0.63, p=0.67	T(42,11)=-1.04, p=0.81	T(42,11)=0.60, p=0.69
Museum Vs. Field F-Test, p-value	T(42,11)=2.97, p=0.03	T(42,11)=2.37, p=0.11	T(42,11)=2.95, p=0.05	T(42,11)=2.28, p=0.15	T(42,11)=2.52, p=0.10
Museum Vs. Field CV diff., p-value	T(42,11)=28.96, p=0.00	T(42,11)=2.26, p=0.73	T(42,11)=1.16, p=0.00	T(42,11)=1.15, p=0.27	T(42,11)=10.58, p=0.99		Intensity Contrast
Intensity Contrast
Museum Vs. Field T-Test, p-value	T(42,11)=-4.30, p=0.00	T(42,11)=-0.90, p=0.55	T(42,11)=-0.87, p=0.59	T(42,11)=-0.91, p=0.81	T(42,11)=0.70, p=0.69
Museum Vs. Field F-Test, p-value	T(42,11)=2.60, p=0.08	T(42,11)=2.63, p=0.07	T(42,11)=1.61, p=0.43	T(42,11)=1.98, p=0.24	T(42,11)=2.27, p=0.13
Museum Vs. Field CV diff., p-value	T(42,11)=30.94, p=0.00	T(42,11)=2.16, p=0.42	T(42,11)=1.35, p=0.13	T(42,11)=1.15, p=0.26	T(42,11)=11.17, p=0.88		Number of Objects
Number of Objects
Museum Vs. Field T-Test, p-value	T(42,11)=-0.17, p=0.97	T(42,11)=-0.87, p=0.55	T(42,11)=-0.90, p=0.59	T(42,11)=-0.59, p=0.81	T(42,11)=1.67, p=0.50
Museum Vs. Field F-Test, p-value	T(42,11)=2.11, p=0.28	T(42,11)=1.62, p=0.52	T(42,11)=1.15, p=0.87	T(42,11)=1.47, p=0.51	T(42,11)=7.02, p=0.00
Museum Vs. Field CV diff., p-value	T(42,11)=5.25, p=0.00	T(42,11)=1.82, p=0.94	T(42,11)=1.37, p=0.23	T(42,11)=1.30, p=0.66	T(42,11)=2.68, p=0.30		Average Area of Objects
Average Area of Objects
Museum Vs. Field T-Test, p-value	T(42,11)=1.91, p=0.12	T(42,11)=-1.38, p=0.44	T(42,11)=0.12, p=0.91	T(42,11)=0.00, p=1.00	T(42,11)=0.25, p=0.85
Museum Vs. Field F-Test, p-value	T(42,11)=5.10, p=0.03	T(42,11)=1.96, p=0.42	T(42,11)=3.62, p=0.12	T(42,11)=2.07, p=0.33	T(42,11)=1.47, p=0.73
Museum Vs. Field CV diff., p-value	T(42,11)=24.11, p=0.00	T(42,11)=2.97, p=0.94	T(42,11)=4.43, p=0.85	T(42,11)=4.51, p=0.06	T(42,11)=4.77, p=0.38		Red Contrast
Red Contrast
Museum Vs. Field T-Test, p-value	T(42,11)=-4.17, p=0.00	T(42,11)=-1.05, p=0.52	T(42,11)=-0.90, p=0.59	T(42,11)=-1.27, p=0.81	T(42,11)=0.44, p=0.74
Museum Vs. Field F-Test, p-value	T(42,11)=3.80, p=0.00	T(42,11)=3.96, p=0.00	T(42,11)=2.84, p=0.05	T(42,11)=2.66, p=0.10	T(42,11)=3.13, p=0.04
Museum Vs. Field CV diff., p-value	T(42,11)=30.23, p=0.00	T(42,11)=2.56, p=0.94	T(42,11)=1.10, p=0.00	T(42,11)=1.14, p=0.78	T(42,11)=9.50, p=0.99		Peak Length
Peak Length
Museum Vs. Field T-Test, p-value	T(42,11)=2.85, p=0.03	T(42,11)=-2.43, p=0.15	T(42,11)=-1.72, p=0.31	T(42,11)=-0.20, p=1.00	T(42,11)=-1.27, p=0.63
Museum Vs. Field F-Test, p-value	T(42,11)=1.83, p=0.37	T(42,11)=4.78, p=0.00	T(42,11)=2.05, p=0.20	T(42,11)=2.24, p=0.15	T(42,11)=2.42, p=0.10
Museum Vs. Field CV diff., p-value	T(42,11)=15.87, p=0.00	T(42,11)=1.80, p=0.33	T(42,11)=1.87, p=0.23	T(42,11)=1.12, p=0.66	T(42,11)=5.01, p=0.56		Blue Contrast
Blue Contrast
Museum Vs. Field T-Test, p-value	T(42,11)=-1.71, p=0.20	T(42,11)=-0.33, p=0.75	T(42,11)=-0.71, p=0.65	T(42,11)=0.03, p=1.00	T(42,11)=1.17, p=0.65
Museum Vs. Field F-Test, p-value	T(42,11)=3.38, p=0.00	T(42,11)=1.23, p=0.63	T(42,11)=2.25, p=0.27	T(42,11)=1.21, p=0.81	T(42,11)=1.11, p=0.84
Museum Vs. Field CV diff., p-value	T(42,11)=8.87, p=0.02	T(42,11)=2.73, p=0.09	T(42,11)=2.06, p=0.00	T(42,11)=2.37, p=0.06	T(42,11)=3.74, p=0.23		Green Contrast
Green Contrast
Museum Vs. Field T-Test, p-value	T(42,11)=-4.31, p=0.00	T(42,11)=-0.85, p=0.55	T(42,11)=-0.85, p=0.59	T(42,11)=-0.75, p=0.81	T(42,11)=0.83, p=0.69
Museum Vs. Field F-Test, p-value	T(42,11)=2.28, p=0.10	T(42,11)=2.22, p=0.13	T(42,11)=1.27, p=0.75	T(42,11)=1.74, p=0.33	T(42,11)=1.90, p=0.25
Museum Vs. Field CV diff., p-value	T(42,11)=33.41, p=0.00	T(42,11)=1.81, p=0.08	T(42,11)=1.83, p=0.51	T(42,11)=1.23, p=0.20	T(42,11)=13.19, p=0.00		Yellow Contrast
Yellow Contrast
Museum Vs. Field T-Test, p-value	T(42,11)=-2.42, p=0.07	T(42,11)=-1.47, p=0.44	T(42,11)=-1.91, p=0.31	T(42,11)=-1.50, p=0.81	T(42,11)=0.75, p=0.69
Museum Vs. Field F-Test, p-value	T(42,11)=4.24, p=0.00	T(42,11)=1.02, p=0.90	T(42,11)=2.66, p=0.20	T(42,11)=1.18, p=0.81	T(42,11)=1.08, p=0.84
Museum Vs. Field CV diff., p-value	T(42,11)=45.00, p=0.00	T(42,11)=1.04, p=0.08	T(42,11)=1.55, p=0.60	T(42,11)=3.59, p=0.38	T(42,11)=3.33, p=0.33		Centrality Ratio
Centrality Ratio
Museum Vs. Field T-Test, p-value	T(42,11)=0.19, p=0.97	T(42,11)=1.18, p=0.45	T(42,11)=1.15, p=0.52	T(42,11)=-0.77, p=0.81	T(42,11)=0.87, p=0.69
Museum Vs. Field F-Test, p-value	T(42,11)=5.89, p=0.00	T(42,11)=1.87, p=0.42	T(42,11)=2.30, p=0.27	T(42,11)=1.67, p=0.51	T(42,11)=1.10, p=0.84
Museum Vs. Field CV diff., p-value	T(42,11)=7.00, p=0.00	T(42,11)=1.05, p=0.94	T(42,11)=2.96, p=0.13	T(42,11)=3.45, p=0.06	T(42,11)=34.43, p=0.00		Occupation Factor
Occupation Factor
Museum Vs. Field T-Test, p-value	T(42,11)=0.02, p=0.99	T(42,11)=0.59, p=0.63	T(42,11)=-0.35, p=0.81	T(42,11)=-0.06, p=1.00	T(42,11)=0.14, p=0.94
Museum Vs. Field F-Test, p-value	T(42,11)=2.38, p=0.22	T(42,11)=1.60, p=0.42	T(42,11)=1.26, p=0.75	T(42,11)=1.36, p=0.61	T(42,11)=1.18, p=0.84
Museum Vs. Field CV diff., p-value	T(42,11)=2.95, p=0.00	T(42,11)=1.07, p=0.22	T(42,11)=4.00, p=0.00	T(42,11)=3.71, p=0.00	T(42,11)=6.89, p=0.99		Normalized Offset
Normalized Offset
Museum Vs. Field T-Test, p-value	T(42,11)=-0.37, p=0.96	T(42,11)=0.42, p=0.72	T(42,11)=1.85, p=0.31	T(42,11)=0.59, p=0.81	T(42,11)=2.76, p=0.20
Museum Vs. Field F-Test, p-value	T(42,11)=1.68, p=0.42	T(42,11)=1.49, p=0.49	T(42,11)=1.00, p=0.98	T(42,11)=4.57, p=0.00	T(42,11)=2.30, p=0.25
Museum Vs. Field CV diff., p-value	T(42,11)=9.04, p=0.02	T(42,11)=1.46, p=0.07	T(42,11)=1.54, p=0.59	T(42,11)=6.02, p=0.78	T(42,11)=4.74, p=0.12

## Sheet: Test Values
Pattern Measurement	Top View	Right View	Left View	Front View	Back View
Fractional Area
Museum Vs. Field T-Test, p-value	-0.07	0.72	-0.14	-0.3	0.72
Museum Vs. Field F-Test, p-value	2.19	1.29	1.12	2.42	1.31
Museum Vs. Field CV diff., p-value	2.63	2.26	3.02	1.98	1.77
Mean Eccentricity
Museum Vs. Field T-Test, p-value	-0.41	1.28	1.3	-1.07	0.56
Museum Vs. Field F-Test, p-value	1.55	1.81	1.34	2.26	1.27
Museum Vs. Field CV diff., p-value	7.71	2.11	2.24	1.55	1.54
Peak Length
Museum Vs. Field T-Test, p-value	2.85	-2.43	-1.72	-0.2	-1.27
Museum Vs. Field F-Test, p-value	1.83	4.78	2.05	2.24	2.42
Museum Vs. Field CV diff., p-value	15.87	1.8	1.87	1.12	5.01
Perimeter Divided Area
Museum Vs. Field T-Test, p-value	-0.7	2.8	2.12	0.7	1.54
Museum Vs. Field F-Test, p-value	3.21	1.39	1.06	1.14	1.01
Museum Vs. Field CV diff., p-value	10.24	2.55	1.16	14.12	1.33
Hue
Museum Vs. Field T-Test, p-value	-3.17	-2.64	-2.68	-2.61	-1.92
Museum Vs. Field F-Test, p-value	1.02	10.03	11.37	10.54	9.5
Museum Vs. Field CV diff., p-value	13.76	3.56	1.95	11.12	4.24
Saturation
Museum Vs. Field T-Test, p-value	-0.21	1.47	1.79	1.02	0.62
Museum Vs. Field F-Test, p-value	1.51	2.29	2.2	6.62	3.21
Museum Vs. Field CV diff., p-value	2.78	9.65	1.79	3.47	3.19
Brightness
Museum Vs. Field T-Test, p-value	-3.46	1.33	1.46	1.07	2.34
Museum Vs. Field F-Test, p-value	5.6	3.36	3.49	1.37	2.94
Museum Vs. Field CV diff., p-value	32.11	2.28	1.66	1.2	13.22
Symmetry
Museum Vs. Field T-Test, p-value	1.64	0.61	-0.58	1.25	-0.87
Museum Vs. Field F-Test, p-value	1.03	1.26	1.01	1.44	1.84
Museum Vs. Field CV diff., p-value	3.12	1.08	2.03	3.41	4.5
Euclidean Distance
Museum Vs. Field T-Test, p-value	-4.28	-1.32	-0.63	-1.04	0.6
Museum Vs. Field F-Test, p-value	2.97	2.37	2.95	2.28	2.52
Museum Vs. Field CV diff., p-value	28.96	2.26	1.16	1.15	10.58
Intensity Contrast
Museum Vs. Field T-Test, p-value	-4.3	-0.9	-0.87	-0.91	0.7
Museum Vs. Field F-Test, p-value	2.6	2.63	1.61	1.98	2.27
Museum Vs. Field CV diff., p-value	30.94	2.16	1.35	1.15	11.17
Number of Objects
Museum Vs. Field T-Test, p-value	-0.17	-0.87	-0.9	-0.59	1.67
Museum Vs. Field F-Test, p-value	2.11	1.62	1.15	1.47	7.02
Museum Vs. Field CV diff., p-value	5.25	1.82	1.37	1.3	2.68
Average Area of Objects
Museum Vs. Field T-Test, p-value	1.91	-1.38	0.12	0	0.25
Museum Vs. Field F-Test, p-value	5.1	1.96	3.62	2.07	1.47
Museum Vs. Field CV diff., p-value	24.11	2.97	4.43	4.51	4.77
Red Contrast
Museum Vs. Field T-Test, p-value	-4.17	-1.05	-0.9	-1.27	0.44
Museum Vs. Field F-Test, p-value	3.8	3.96	2.84	2.66	3.13
Museum Vs. Field CV diff., p-value	30.23	2.56	1.1	1.14	9.5
Peak Length
Museum Vs. Field T-Test, p-value	2.85	-2.43	-1.72	-0.2	-1.27
Museum Vs. Field F-Test, p-value	1.83	4.78	2.05	2.24	2.42
Museum Vs. Field CV diff., p-value	15.87	1.8	1.87	1.12	5.01
Blue Contrast
Museum Vs. Field T-Test, p-value	-1.71	-0.33	-0.71	0.03	1.17
Museum Vs. Field F-Test, p-value	3.38	1.23	2.25	1.21	1.11
Museum Vs. Field CV diff., p-value	8.87	2.73	2.06	2.37	3.74
Green Contrast
Museum Vs. Field T-Test, p-value	-4.31	-0.85	-0.85	-0.75	0.83
Museum Vs. Field F-Test, p-value	2.28	2.22	1.27	1.74	1.9
Museum Vs. Field CV diff., p-value	33.41	1.81	1.83	1.23	13.19
Yellow Contrast
Museum Vs. Field T-Test, p-value	-2.42	-1.47	-1.91	-1.5	0.75
Museum Vs. Field F-Test, p-value	4.24	1.02	2.66	1.18	1.08
Museum Vs. Field CV diff., p-value	45	1.04	1.55	3.59	3.33
Centrality Ratio
Museum Vs. Field T-Test, p-value	0.19	1.18	1.15	-0.77	0.87
Museum Vs. Field F-Test, p-value	5.89	1.87	2.3	1.67	1.1
Museum Vs. Field CV diff., p-value	7	1.05	2.96	3.45	34.43
Occupation Factor
Museum Vs. Field T-Test, p-value	0.02	0.59	-0.35	-0.06	0.14
Museum Vs. Field F-Test, p-value	2.38	1.6	1.26	1.36	1.18
Museum Vs. Field CV diff., p-value	2.95	1.07	4	3.71	6.89
Normalized Offset
Museum Vs. Field T-Test, p-value	-0.37	0.42	1.85	0.59	2.76
Museum Vs. Field F-Test, p-value	1.68	1.49	1	4.57	2.3
Museum Vs. Field CV diff., p-value	9.04	1.46	1.54	6.02	4.74

## Sheet: Table Adjusted P-values
Pattern Measurement	Top View	Right View	Left View	Front View	Back View		Fractional Area
Fractional Area
Museum Vs. Field T-Test, p-value	0.989474	0.6	0.91	1	0.694118				0.989474	0.6	0.91	1	0.694118		-2e-08	0	0	0	0	-1.2e-07	2.9e-07	0	0	0
Museum Vs. Field F-Test, p-value	0.266667	0.631579	0.870588	0.15	0.728571				0.266667	0.631579	0.870588	0.15	0.728571		-3e-08	5e-08	0	0	0
Museum Vs. Field CV diff., p-value	0.0222222	0.446154	0.0857143	0.1	0.12		Mean Eccentricity		0.0222222	0.446154	0.0857143	0.1	0.12		0	0	0	0	0
Mean Eccentricity															0	0	0	0	0
Museum Vs. Field T-Test, p-value	0.96	0.44	0.466667	0.814286	0.694118				0.96	0.44	0.466667	0.814286	0.694118		0	0	0	0	0
Museum Vs. Field F-Test, p-value	0.488889	0.32	0.723077	0.3	0.733333				0.488889	0.32	0.723077	0.3	0.733333		-1e-08	0	0	0	0
Museum Vs. Field CV diff., p-value	0	0.471429	0.230769	0.415385	0.557143		Peak Length		0	0.471429	0.230769	0.415385	0.557143		0	0	0	0	0
Peak Length															0	0	0	0	0
Museum Vs. Field T-Test, p-value	0.025	0.15	0.314286	1	0.628571				0.025	0.15	0.314286	1	0.628571		0	0	0	0	0
Museum Vs. Field F-Test, p-value	0.373333	0	0.2	0.15	0.1				0.373333	0	0.2	0.15	0.1		3e-08	0	0	0	0
Museum Vs. Field CV diff., p-value	0	0.327273	0.230769	0.6625	0.557143		Perimeter Divided Area		0	0.327273	0.230769	0.6625	0.557143		0	0	0	0	0
Perimeter Divided Area															0	0	0	0	0
Museum Vs. Field T-Test, p-value	0.753846	0.15	0.314286	0.814286	0.56				0.753846	0.15	0.314286	0.814286	0.56		-5e-08	0	0	0	0
Museum Vs. Field F-Test, p-value	0.0888889	0.631579	0.99	0.8	0.9				0.0888889	0.631579	0.99	0.8	0.9		0	5e-08	0	0	0
Museum Vs. Field CV diff., p-value	0	0.706667	0.831579	0	0.99		Hue		0	0.706667	0.831579	0	0.99		0	0	0	0	0
Hue															0	0	0	0	0
Museum Vs. Field T-Test, p-value	0.025	0.15	0.314286	0.4	0.5				0.025	0.15	0.314286	0.4	0.5		0	0	0	0	0
Museum Vs. Field F-Test, p-value	0.936842	0	0	0	0				0.936842	0	0	0	0		1e-08	0	0	0	0
Museum Vs. Field CV diff., p-value	0	0.0857143	0.0333333	0	0.2		Saturation		0	0.0857143	0.0333333	0	0.2		0	0	0	0	0
Saturation															0	0	0	0	0
Museum Vs. Field T-Test, p-value	0.966667	0.44	0.314286	0.814286	0.694118				0.966667	0.44	0.314286	0.814286	0.694118		-3e-08	0	0	0	0
Museum Vs. Field F-Test, p-value	0.4125	0.125	0.2	0	0.04				0.4125	0.125	0.2	0	0.04		0	0	0	0	0
Museum Vs. Field CV diff., p-value	0.526316	0	0.7	0.0571429	0.436364		Brightness		0.526316	0	0.7	0.0571429	0.436364		0	0	0	0	0
Brightness															0	0	0	0	0
Museum Vs. Field T-Test, p-value	0	0.44	0.425	0.814286	0.4				0	0.44	0.425	0.814286	0.4		0	0	0	0	0
Museum Vs. Field F-Test, p-value	0	0	0	0.694118	0.04				0	0	0	0.694118	0.04		0	0	0	0	0
Museum Vs. Field CV diff., p-value	0	0.2	0.0333333	0.8	0.0666667		Symmetry		0	0.2	0.0333333	0.8	0.0666667		0	0	0	0	0
Symmetry															0	0	0	0	0
Museum Vs. Field T-Test, p-value	0.2	0.633333	0.670588	0.814286	0.694118				0.2	0.633333	0.670588	0.814286	0.694118		0	0	0	0	0
Museum Vs. Field F-Test, p-value	0.97	0.631579	0.978947	0.65	0.45				0.97	0.631579	0.978947	0.65	0.45		0	5e-08	0	0	0
Museum Vs. Field CV diff., p-value	0.83	0.0666667	0.471429	0.84	0.99		Euclidean Distance		0.83	0.0666667	0.471429	0.84	0.99		0	0	0	0	0
Euclidean Distance															0	0	0	0	0
Museum Vs. Field T-Test, p-value	0	0.44	0.670588	0.814286	0.694118				0	0.44	0.670588	0.814286	0.694118		0	0	0	0	0
Museum Vs. Field F-Test, p-value	0.0285714	0.114286	0.05	0.15	0.1				0.0285714	0.114286	0.05	0.15	0.1		0	1e-08	0	0	0
Museum Vs. Field CV diff., p-value	0	0.725	0	0.272727	0.99		Intensity Contrast		0	0.725	0	0.272727	0.99		0	0	0	0	0
Intensity Contrast															0	0	0	0	0
Museum Vs. Field T-Test, p-value	0	0.546667	0.585714	0.814286	0.694118				0	0.546667	0.585714	0.814286	0.694118		0	0	0	0	0
Museum Vs. Field F-Test, p-value	0.075	0.0666667	0.433333	0.244444	0.133333				0.075	0.0666667	0.433333	0.244444	0.133333		0	0	0	0	0
Museum Vs. Field CV diff., p-value	0	0.416667	0.133333	0.26	0.88		Number of Objects		0	0.416667	0.133333	0.26	0.88		0	0	0	0	0
Number of Objects															0	0	0	0	0
Museum Vs. Field T-Test, p-value	0.966667	0.546667	0.585714	0.814286	0.5				0.966667	0.546667	0.585714	0.814286	0.5		-3e-08	0	0	0	0
Museum Vs. Field F-Test, p-value	0.276923	0.52	0.870588	0.514286	0				0.276923	0.52	0.870588	0.514286	0		-2e-08	0	0	0	0
Museum Vs. Field CV diff., p-value	0	0.94	0.230769	0.6625	0.3		Average Area of Objects		0	0.94	0.230769	0.6625	0.3		0	0	0	0	0
Average Area of Objects															0	0	0	0	0
Museum Vs. Field T-Test, p-value	0.12	0.44	0.91	1	0.852632				0.12	0.44	0.91	1	0.852632		0	0	0	0	0
Museum Vs. Field F-Test, p-value	0.0285714	0.415385	0.12	0.333333	0.728571				0.0285714	0.415385	0.12	0.333333	0.728571		0	2e-08	0	0	0
Museum Vs. Field CV diff., p-value	0	0.94	0.85	0.0571429	0.38		Red Contrast		0	0.94	0.85	0.0571429	0.38		0	0	0	0	0
Red Contrast															0	0	0	0	0
Museum Vs. Field T-Test, p-value	0	0.516667	0.585714	0.814286	0.744444				0	0.516667	0.585714	0.814286	0.744444		0	0	0	0	0
Museum Vs. Field F-Test, p-value	0	0	0.05	0.1	0.04				0	0	0.05	0.1	0.04		0	0	0	0	0
Museum Vs. Field CV diff., p-value	0	0.94	0	0.777778	0.99		Peak Length		0	0.94	0	0.777778	0.99		0	0	0	0	0
Peak Length															0	0	0	0	0
Museum Vs. Field T-Test, p-value	0.025	0.15	0.314286	1	0.628571				0.025	0.15	0.314286	1	0.628571		0	0	0	0	0
Museum Vs. Field F-Test, p-value	0.373333	0	0.2	0.15	0.1				0.373333	0	0.2	0.15	0.1		3e-08	0	0	0	0
Museum Vs. Field CV diff., p-value	0	0.327273	0.230769	0.6625	0.557143		Blue Contrast		0	0.327273	0.230769	0.6625	0.557143		0	0	0	0	0
Blue Contrast															0	0	0	0	0
Museum Vs. Field T-Test, p-value	0.2	0.75	0.653333	1	0.65				0.2	0.75	0.653333	1	0.65		0	0	0	0	0
Museum Vs. Field F-Test, p-value	0	0.631579	0.272727	0.81	0.842105				0	0.631579	0.272727	0.81	0.842105		0	5e-08	0	0	0
Museum Vs. Field CV diff., p-value	0.0222222	0.0857143	0	0.0571429	0.228571		Green Contrast		0.0222222	0.0857143	0	0.0571429	0.228571		0	0	0	0	0
Green Contrast															0	0	0	0	0
Museum Vs. Field T-Test, p-value	0	0.546667	0.585714	0.814286	0.694118				0	0.546667	0.585714	0.814286	0.694118		0	0	0	0	0
Museum Vs. Field F-Test, p-value	0.1	0.133333	0.746667	0.333333	0.254545				0.1	0.133333	0.746667	0.333333	0.254545		0	3e-08	0	0	0
Museum Vs. Field CV diff., p-value	0	0.08	0.506667	0.2	0		Yellow Contrast		0	0.08	0.506667	0.2	0		0	0	0	0	0
Yellow Contrast															0	0	0	0	0
Museum Vs. Field T-Test, p-value	0.0666667	0.44	0.314286	0.814286	0.694118				0.0666667	0.44	0.314286	0.814286	0.694118		0	0	0	0	0
Museum Vs. Field F-Test, p-value	0	0.9	0.2	0.81	0.842105				0	0.9	0.2	0.81	0.842105		0	0	0	0	0
Museum Vs. Field CV diff., p-value	0	0.08	0.6	0.383333	0.333333		Centrality Ratio		0	0.08	0.6	0.383333	0.333333		0	0	0	0	0
Centrality Ratio															0	0	0	0	0
Museum Vs. Field T-Test, p-value	0.966667	0.454545	0.52	0.814286	0.694118				0.966667	0.454545	0.52	0.814286	0.694118		-3e-08	0	0	0	0
Museum Vs. Field F-Test, p-value	0	0.415385	0.272727	0.514286	0.842105				0	0.415385	0.272727	0.514286	0.842105		0	2e-08	0	0	0
Museum Vs. Field CV diff., p-value	0	0.94	0.125	0.0571429	0		Occupation Factor		0	0.94	0.125	0.0571429	0		0	0	0	0	0
Occupation Factor															0	0	0	0	0
Museum Vs. Field T-Test, p-value	0.99	0.633333	0.811111	1	0.94				0.99	0.633333	0.811111	1	0.94		0	0	0	0	0
Museum Vs. Field F-Test, p-value	0.218182	0.415385	0.746667	0.613333	0.8375				0.218182	0.415385	0.746667	0.613333	0.8375		2e-08	2e-08	0	0	0
Museum Vs. Field CV diff., p-value	0	0.222222	0	0	0.99		Normalized Offset		0	0.222222	0	0	0.99		0	0	0	0	0
Normalized Offset															0	0	0	0	0
Museum Vs. Field T-Test, p-value	0.96	0.715789	0.314286	0.814286	0.2				0.96	0.715789	0.314286	0.814286	0.2		0	0	0	0	0
Museum Vs. Field F-Test, p-value	0.423529	0.485714	0.978947	0	0.254545				0.423529	0.485714	0.978947	0	0.254545		1e-08	-1e-08	0	0	0
Museum Vs. Field CV diff., p-value	0.0222222	0.0666667	0.5875	0.777778	0.12				0.0222222	0.0666667	0.5875	0.777778	0.12		0	0	0	0	0

## Sheet: Old Table
Pattern measurement	Top View	Right View	Left View	Front View	Back View
Fractional Area
Museum Vs. Field T-Test (PValue)	P=0.94	P=0.48	P=0.89	P=0.77	P=0.48
Museum Vs. Field F-Test (PValue)	P=0.16	P=0.52	P=0.73	P=0.04	P=0.51
Museum Vs. Field CV diff. (PValue)	P=0.02	P=0.29	P=0.03	P=0.04	P=0.03
Mean Eccentricity
Museum Vs. Field T-Test (PValue)	P=0.69	P=0.22	P=0.21	P=0.29	P=0.59
Museum Vs. Field F-Test (PValue)	P=0.44	P=0.16	P=0.47	P=0.15	P=0.55
Museum Vs. Field CV diff. (PValue)	P<.001	P=0.18	P=0.15	P=0.44	P=0.31
Peak Length
Museum Vs. Field T-Test (PValue)	P=0.01	P=0.03	P=0.11	P=0.85	P=0.23
Museum Vs. Field F-Test (PValue)	P=0.28	P<0.001	P=0.09	P=0.06	P=0.04
Museum Vs. Field CV diff. (PValue)	P<0.001	P=0.18	P=0.15	P=0.53	P<0.001
Perimeter/Area
Museum Vs. Field T-Test (PValue)	P=0.49	P=0.01	P=0.05	P=0.49	P=0.14
Museum Vs. Field F-Test (PValue)	P=0.04	P=0.58	P=0.99	P=0.72	P=0.9
Museum Vs. Field CV diff. (PValue)	P<0.001	P=0.53	P=0.79	P<0.001	P=0.85
Hue
Museum Vs. Field T-Test (PValue)	P=0.005	P=0.02	P=0.02	P=0.02	P=0.08
Museum Vs. Field F-Test (PValue)	P=0.89	P<.001	P<0.001	P<0.001	P<0.001
Museum Vs. Field CV diff. (PValue)	P<0.001	P=0.03	P=0.01	P<0.001	P=0.06
Saturation
Museum Vs. Field T-Test (PValue)	P=0.83	P=0.16	P=0.09	P=0.33	P=0.54
Museum Vs. Field F-Test (PValue)	P=0.33	P=0.05	P=0.07	P<0.001	P=0.006
Museum Vs. Field CV diff. (PValue)	P=0.5	P=0.001	P=0.63	P=0.02	P=0.24
Brightness
Museum Vs. Field T-Test (PValue)	P=0.004	P=0.21	P=0.17	P=0.3	P=0.04
Museum Vs. Field F-Test (PValue)	P<0.001	P=0.004	P=0.003	P=0.59	P=0.01
Museum Vs. Field CV diff. (PValue)	P<0.001	P=0.08	P=0.006	P=0.75	P=0.01
Symmetry
Museum Vs. Field T-Test (PValue)	P=0.11	P=0.55	P=0.57	P=0.22	P=0.39
Museum Vs. Field F-Test (PValue)	P=0.97	P=0.56	P=0.91	P=0.52	P=0.27
Museum Vs. Field CV diff. (PValue)	P<0.001	P=0.53	P=0.33	P=0.02	P<.001
Euclidean Distance
Museum Vs. Field T-Test (PValue)	P<0.001	P=0.21	P=0.54	P=0.32	P=0.56
Museum Vs. Field F-Test (PValue)	P=0.01	P=0.04	P=0.01	P=0.06	P=0.03
Museum Vs. Field CV diff. (PValue)	P<0.001	P=0.58	P=0.005	P=0.15	P<0.001
Intensity Contrast
Museum Vs. Field T-Test (PValue)	P<.01	P=0.38	P=0.4	P=0.38	P=0.5
Museum Vs. Field F-Test (PValue)	P=0.03	P=0.02	P=0.26	P=0.11	P=0.06
Museum Vs. Field CV diff. (PValue)	P<0.001	P=0.16	P=0.05	P<0.001	P<0.001
Number of Objects
Museum Vs. Field T-Test (PValue)	P=0.87	P=0.39	P=0.38	P=0.56	P=0.1
Museum Vs. Field F-Test (PValue)	P=0.18	P=0.39	P=0.7	P=0.36	P<0.001
Museum Vs. Field CV diff. (PValue)	P<0.001	P=0.91	P=0.13	P=0.48	P=0.12
Average Area of Objects
Museum Vs. Field T-Test (PValue)	P=0.06	P=0.18	P=0.91	P=0.99	P=0.81
Museum Vs. Field F-Test (PValue)	P=0.006	P=0.23	P=0.03	P=0.19	P=0.5
Museum Vs. Field CV diff. (PValue)	P<0.001	P=0.01	P=0.01	P=0.01	P=0.008
Red Contrast
Museum Vs. Field T-Test (PValue)	P<0.001	P=0.31	P=0.39	P=0.23	P=0.67
Museum Vs. Field F-Test (PValue)	P=0.002	P<0.001	P=0.01	P=0.02	P=0.007
Museum Vs. Field CV diff. (PValue)	P<0.001	P=0.99	P=0.003	P=0.7	P<0.001
Blue Contrast
Museum Vs. Field T-Test (PValue)	P=0.11	P=0.75	P=0.49	P=0.97	P=0.26
Museum Vs. Field F-Test (PValue)	P=0.004	P=0.6	P=0.15	P=0.77	P=0.76
Museum Vs. Field CV diff. (PValue)	P=0.02	P=0.003	P=0.4	P<0.001	P=0.57
Green Contrast
Museum Vs. Field T-Test (PValue)	P<0.001	P=0.41	P=0.41	P=0.46	P=0.42
Museum Vs. Field F-Test (PValue)	P=0.05	P=0.06	P=0.55	P=0.2	P=0.13
Museum Vs. Field CV diff. (PValue)	P<0.001	P=0.009	P=0.36	P<0.001	P<0.001
Yellow Contrast
Museum Vs. Field T-Test (PValue)	P=0.03	P=0.16	P=0.07	P=0.15	P=0.46
Museum Vs. Field F-Test (PValue)	P<0.001	P=0.9	P=0.08	P=0.81	P=0.8
Museum Vs. Field CV diff. (PValue)	P<0.001	P<0.001	P<0.001	P=0.35	P=0.54
Centrality Ratio
Museum Vs. Field T-Test (PValue)	P=0.85	P=0.25	P=0.26	P=0.45	P=0.4
Museum Vs. Field F-Test (PValue)	P=0.003	P=0.26	P=0.14	P=0.36	P=0.76
Museum Vs. Field CV diff. (PValue)	P=0.002	P=0.93	P=0.05	P=0.02	P<0.001
Occupation Factor
Museum Vs. Field T-Test (PValue)	P=0.99	P=0.57	P=0.73	P=0.95	P=0.94
Museum Vs. Field F-Test (PValue)	P=0.12	P=0.27	P=0.56	P=0.46	P=0.67
Museum Vs. Field CV diff. (PValue)	P<0.001	P=0.1	P<0.001	P<0.001	P<0.001
Normalized Offset
Museum Vs. Field T-Test (PValue)	P=0.72	P=0.68	P=0.08	P=0.57	P=0.01
Museum Vs. Field F-Test (PValue)	P=0.36	P=0.34	P=0.93	P<0.001	P=0.14
Museum Vs. Field CV diff. (PValue)	P<0.001	P=0.002	P=0.42	P=0.71	P=0.27

## Sheet: Fractional Area
	Top view front		Mean +/-SD		CV	Right side		Mean +/-SD		CV	Left side		Mean +/-SD		CV	Front		Mean +/-SD		CV	Back		Mean +/-SD		CV
Indiv	image 1	image 2	mean	sd		Image 1	Image2	mean	sd		Image 1	Image2	mean	sd		Image 1	Image2	mean	sd		Image 1	Image2	mean	sd
17923	0.394	0.408	0.401	0.00989949	0.024687	0.3239	0.3464	0.33515	0.0159099	0.047471	0.3703	0.3751	0.3727	0.00339411	0.00910682	0.3489	0.3213	0.3351	0.0195161	0.0582398	0.4036	0.3923	0.39795	0.00799031	0.0200787
20544	0.3602	0.3666	0.3634	0.00452548	0.0124532	0.3951	0.4062	0.40065	0.00784889	0.0195904	0.3902	0.3896	0.3899	0.000424264	0.00108814	0.2955	0.2965	0.296	0.000707107	0.00238887	0.3286	0.3527	0.34065	0.0170413	0.0500258
22468	0.3649	0.3735	0.3692	0.00608112	0.0164711	0.4556	0.459	0.4573	0.00240416	0.0052573	0.4598	0.4553	0.45755	0.00318198	0.00695439	0.3591	0.3582	0.35865	0.000636396	0.00177442	0.299	0.3068	0.3029	0.00551543	0.0182088
22609	0.3891	0.3921	0.3906	0.00212132	0.00543093	0.401	0.4043	0.40265	0.00233345	0.00579524	0.4059	0.3996	0.40275	0.00445477	0.0110609	0.3053	0.3063	0.3058	0.000707107	0.00231232	0.3799	0.3964	0.38815	0.0116673	0.0300586
22612	0.2839	0.2519	0.2679	0.0226274	0.0844622	0.3146	0.3114	0.313	0.00226274	0.00722921	0.3814	0.4044	0.3929	0.0162635	0.0413934	0.179	0.2145	0.19675	0.0251023	0.127585	0.294	0.2692	0.2816	0.0175362	0.0622736
22613	0.2786	0.2812	0.2799	0.00183848	0.00656834	0.2773	0.2823	0.2798	0.00353553	0.0126359	0.2106	0.2219	0.21625	0.00799031	0.0369494	0.2065	0.2116	0.20905	0.00360624	0.0172506	0.3957	0.3771	0.3864	0.0131522	0.0340377
22614	0.2979	0.3046	0.30125	0.00473762	0.0157265	0.2863	0.2857	0.286	0.000424264	0.00148344	0.3264	0.3218	0.3241	0.00325269	0.0100361	0.2326	0.2461	0.23935	0.00954594	0.0398828	0.3691	0.388	0.37855	0.0133643	0.035304
27761	0.2919	0.3204	0.30615	0.0201525	0.0658257	0.3607	0.358	0.35935	0.00190919	0.00531289	0.3455	0.3501	0.3478	0.00325269	0.00935219	0.2707	0.2794	0.27505	0.00615183	0.0223662	0.2978	0.2869	0.29235	0.00770746	0.0263638
36684	0.3437	0.3395	0.3416	0.00296985	0.00869394	0.3566	0.3598	0.3582	0.00226274	0.00631698	0.3367	0.3355	0.3361	0.000848528	0.00252463	0.3154	0.3082	0.3118	0.00509117	0.0163283	0.3005	0.3051	0.3028	0.00325269	0.010742
42824	0.3172	0.3094	0.3133	0.00551543	0.0176043	0.3697	0.3739	0.3718	0.00296985	0.00798776	0.369	0.3726	0.3708	0.00254558	0.00686511	0.2282	0.2197	0.22395	0.00601041	0.0268382	0.3309	0.3422	0.33655	0.00799031	0.0237418
42825	0.3427	0.342	0.34235	0.000494975	0.00144581	0.2967	0.2913	0.294	0.00381838	0.0129877	0.3083	0.3056	0.30695	0.00190919	0.00621987	0.3119	0.3095	0.3107	0.00169706	0.00546204	0.3244	0.3201	0.32225	0.00304056	0.0094354
45769	0.38	0.3748	0.3774	0.00367696	0.00974286	0.4042	0.4031	0.40365	0.000777817	0.00192696	0.3637	0.3697	0.3667	0.00424264	0.0115698	0.3597	0.3651	0.3624	0.00381838	0.0105364	0.3333	0.348	0.34065	0.0103945	0.0305136
45779	0.2314	0.2459	0.23865	0.010253	0.0429627	0.3327	0.3367	0.3347	0.00282843	0.00845063	0.3052	0.2767	0.29095	0.0201525	0.0692646	0.2344	0.2656	0.25	0.0220617	0.0882469	0.3224	0.3451	0.33375	0.0160513	0.0480939
49607	0.2318	0.2337	0.23275	0.0013435	0.0057723	0.2774	0.2823	0.27985	0.00346482	0.012381	0.2798	0.2944	0.2871	0.0103238	0.0359588	0.2387	0.2503	0.2445	0.00820244	0.0335478	0.343	0.3398	0.3414	0.00226274	0.00662783
52615	0.2984	0.2994	0.2989	0.000707107	0.0023657	0.335	0.3358	0.3354	0.000565685	0.0016866	0.3218	0.3267	0.32425	0.00346482	0.0106857	0.2608	0.2637	0.26225	0.00205061	0.00781929	0.3044	0.3065	0.30545	0.00148492	0.00486143
65908	0.2918	0.3012	0.2965	0.0066468	0.0224176	0.3649	0.3732	0.36905	0.00586899	0.015903	0.362	0.3759	0.36895	0.00982878	0.0266399	0.2727	0.2862	0.27945	0.00954594	0.0341597	0.2887	0.275	0.28185	0.00968736	0.0343706
139661	0.3406	0.3494	0.345	0.00622254	0.0180363	0.4613	0.4535	0.4574	0.00551543	0.0120582	0.3907	0.3781	0.3844	0.00890955	0.0231778	0.2892	0.2727	0.28095	0.0116673	0.0415279	0.2689	0.2468	0.25785	0.0156271	0.0606052
141485	0.2026	0.1937	0.19815	0.00629325	0.03176	0.3011	0.2967	0.2989	0.00311127	0.0104091	0.2897	0.3091	0.2994	0.0137179	0.0458179	0.2423	0.2389	0.2406	0.00240416	0.00999237	0.288	0.2873	0.28765	0.000494975	0.00172075
203066	0.267	0.2637	0.26535	0.00233345	0.00879387	0.335	0.3367	0.33585	0.00120208	0.00357922	0.329	0.3284	0.3287	0.000424264	0.00129073	0.2541	0.2639	0.259	0.00692965	0.0267554	0.2665	0.274	0.27025	0.0053033	0.0196237
203309	0.2216	0.2145	0.21805	0.00502046	0.0230243	0.2431	0.2418	0.24245	0.000919239	0.00379146	0.2546	0.2658	0.2602	0.0079196	0.0304366	0.2309	0.2249	0.2279	0.00424264	0.0186162	0.2926	0.2949	0.29375	0.00162635	0.0055365
288185	0.4184	0.3948	0.4066	0.0166877	0.0410421	0.374	0.3828	0.3784	0.00622254	0.0164443	0.3022	0.3344	0.3183	0.0227688	0.0715326	0.2755	0.261	0.26825	0.010253	0.038222	0.2775	0.2654	0.27145	0.00855599	0.0315196
288186	0.3243	0.3139	0.3191	0.00735391	0.0230458	0.3652	0.342	0.3536	0.0164049	0.0463939	0.3444	0.3373	0.34085	0.00502046	0.0147292	0.3264	0.3043	0.31535	0.0156271	0.0495547	0.37	0.3791	0.37455	0.00643467	0.0171797
288187	0.2349	0.2133	0.2241	0.0152735	0.0681549	0.3011	0.2895	0.2953	0.00820244	0.0277766	0.2695	0.251	0.26025	0.0130815	0.050265	0.2268	0.2074	0.2171	0.0137179	0.0631869	0.2304	0.235	0.2327	0.00325269	0.013978
288189	0.2784	0.3038	0.2911	0.0179605	0.0616988	0.3169	0.3042	0.31055	0.00898026	0.0289173	0.2842	0.2819	0.28305	0.00162635	0.00574579	0.3118	0.3174	0.3146	0.0039598	0.0125868	0.3496	0.3443	0.34695	0.00374767	0.0108017
288199	0.2188	0.232	0.2254	0.00933381	0.04141	0.2683	0.2793	0.2738	0.00777817	0.0284082	0.294	0.2865	0.29025	0.0053033	0.0182715	0.2168	0.2074	0.2121	0.0066468	0.0313381	0.3531	0.332	0.34255	0.01492	0.0435555
288210	0.3161	0.3181	0.3171	0.00141421	0.00445983	0.3944	0.3696	0.382	0.0175362	0.0459064	0.395	0.4052	0.4001	0.00721249	0.0180267	0.2993	0.3005	0.2999	0.000848528	0.00282937	0.4071	0.3949	0.401	0.0086267	0.021513
324296	0.2968	0.3043	0.30055	0.0053033	0.0176453	0.3786	0.3811	0.37985	0.00176777	0.00465386	0.3435	0.3464	0.34495	0.00205061	0.00594466	0.2177	0.212	0.21485	0.00403051	0.0187596	0.2605	0.2628	0.26165	0.00162635	0.00621573
326308	0.2634	0.2716	0.2675	0.00579828	0.0216758	0.3163	0.3072	0.31175	0.00643467	0.0206405	0.2993	0.3033	0.3013	0.00282843	0.00938741	0.2767	0.2822	0.27945	0.00388909	0.0139169	0.2944	0.3039	0.29915	0.00671751	0.0224553
497193	0.2697	0.261	0.26535	0.00615183	0.0231838	0.3167	0.3048	0.31075	0.00841457	0.0270783	0.2761	0.2766	0.27635	0.000353553	0.00127937	0.2713	0.2883	0.2798	0.0120208	0.0429622	0.3217	0.3262	0.32395	0.00318198	0.00982244
497202	0.3586	0.3655	0.36205	0.00487904	0.0134761	0.3369	0.3396	0.33825	0.00190919	0.00564431	0.3801	0.3873	0.3837	0.00509117	0.0132686	0.3744	0.3576	0.366	0.0118794	0.0324574	0.3933	0.3894	0.39135	0.00275772	0.00704668
497203	0.1473	0.1532	0.15025	0.00417193	0.0277666	0.2339	0.2348	0.23435	0.000636396	0.00271558	0.1777	0.2123	0.195	0.0244659	0.125466	0.2084	0.1989	0.20365	0.00671751	0.0329856	0.2197	0.2186	0.21915	0.000777817	0.00354925
497237	0.2697	0.275	0.27235	0.00374767	0.0137605	0.2763	0.2763	0.2763	0	0	0.2667	0.2762	0.27145	0.00671751	0.0247468	0.2458	0.2252	0.2355	0.0145664	0.0618531	0.2878	0.3239	0.30585	0.0255266	0.083461
497243	0.2061	0.201	0.20355	0.00360624	0.0177168	0.2885	0.2968	0.29265	0.00586899	0.0200546	0.2867	0.2858	0.28625	0.000636396	0.00222322	0.1803	0.1889	0.1846	0.00608112	0.0329421	0.2286	0.2325	0.23055	0.00275772	0.0119615
497248	0.3666	0.3499	0.35825	0.0118087	0.0329621	0.2736	0.266	0.2698	0.00537401	0.0199185	0.287	0.2828	0.2849	0.00296985	0.0104242	0.3066	0.3038	0.3052	0.0019799	0.00648722	0.3304	0.3288	0.3296	0.00113137	0.00343256
497251	0.3199	0.3187	0.3193	0.000848528	0.00265746	0.3393	0.3438	0.34155	0.00318198	0.00931629	0.359	0.3579	0.35845	0.000777817	0.00216995	0.3271	0.3214	0.32425	0.00403051	0.0124303	0.4278	0.4417	0.43475	0.00982878	0.0226079
497252	0.2876	0.2835	0.28555	0.00289914	0.0101528	0.2853	0.2924	0.28885	0.00502046	0.0173808	0.2983	0.2942	0.29625	0.00289914	0.00978612	0.2579	0.2555	0.2567	0.00169706	0.00661105	0.3447	0.341	0.34285	0.0026163	0.00763102
497261	0.1797	0.1913	0.1855	0.00820244	0.044218	0.2719	0.2869	0.2794	0.0106066	0.0379621	0.2881	0.2868	0.28745	0.000919239	0.00319791	0.1901	0.1643	0.1772	0.0182434	0.102953	0.2792	0.3146	0.2969	0.0250316	0.0843098
497272	0.2397	0.2361	0.2379	0.00254558	0.0107002	0.3057	0.2972	0.30145	0.00601041	0.0199383	0.2868	0.2954	0.2911	0.00608112	0.0208901	0.2061	0.2054	0.20575	0.000494975	0.00240571	0.3038	0.2967	0.30025	0.00502046	0.0167209
497276	0.16	0.1667	0.16335	0.00473762	0.0290028	0.2577	0.2486	0.25315	0.00643467	0.0254184	0.2467	0.2525	0.2496	0.00410122	0.0164312	0.1863	0.1769	0.1816	0.0066468	0.0366013	0.208	0.2069	0.20745	0.000777817	0.00374942
497302	0.3799	0.3961	0.388	0.0114551	0.0295235	0.3778	0.3999	0.38885	0.0156271	0.0401879	0.4005	0.408	0.40425	0.0053033	0.0131189	0.3358	0.3164	0.3261	0.0137179	0.0420665	0.3629	0.3715	0.3672	0.00608112	0.0165608
519611	0.1732	0.1586	0.1659	0.0103238	0.0622288	0.2339	0.2253	0.2296	0.00608112	0.0264857	0.2266	0.2277	0.22715	0.000777817	0.00342425	0.1958	0.1951	0.19545	0.000494975	0.00253249	0.2859	0.326	0.30595	0.028355	0.0926785
519622	0.3102	0.3235	0.31685	0.00940452	0.0296813	0.2745	0.2669	0.2707	0.00537401	0.0198523	0.2867	0.2718	0.27925	0.0105359	0.0377292	0.3017	0.3093	0.3055	0.00537401	0.0175909	0.2894	0.2977	0.29355	0.00586899	0.0199931
575054	0.2675	0.2737	0.2706	0.00438406	0.0162013	0.3102	0.3111	0.31065	0.000636396	0.0020486	0.3121	0.3109	0.3115	0.000848528	0.00272401	0.2696	0.2728	0.2712	0.00226274	0.00834344	0.2965	0.2966	0.29655	7.07107e-05	0.000238444	Average Smithsonian	top	right	left	front	back
mn1	0.3471	0.3472	0.34715	7.07107e-05	0.000203689	0.2965	0.2957	0.2961	0.000565685	0.00191045	0.3935	0.3979	0.3957	0.00311127	0.0078627	0.1256	0.1316	0.1286	0.00424264	0.032991	0.4039	0.428	0.41595	0.0170413	0.0409695	CV	0.0250097	0.0158479	0.0203994	0.0293778	0.0251908
mn2	0.2161	0.2152	0.21565	0.000636396	0.00295106	0.2501	0.2501	0.2501	0	0	0.2217	0.2213	0.2215	0.000282843	0.00127694	0.2242	0.2262	0.2252	0.00141421	0.00627981	0.2643	0.255	0.25965	0.00657609	0.0253268	Average Field
mn3	0.285	0.2893	0.28715	0.00304056	0.0105887	0.2075	0.2016	0.20455	0.00417193	0.0203956	0.2793	0.262	0.27065	0.0122329	0.0451984	0.3358	0.325	0.3304	0.00763675	0.0231137	0.283	0.2737	0.27835	0.00657609	0.0236253	CV	0.0121843	0.0120098	0.0096759	0.0154112	0.0295581
mn8	0.3169	0.3029	0.3099	0.00989949	0.0319442	0.3715	0.3792	0.37535	0.00544472	0.0145057	0.3512	0.3593	0.35525	0.00572756	0.0161226	0.3163	0.3012	0.30875	0.0106773	0.0345824	0.302	0.2994	0.3007	0.00183848	0.00611399
mn9	0.2918	0.2977	0.29475	0.00417193	0.0141541	0.3209	0.3359	0.3284	0.0106066	0.0322978	0.2999	0.2986	0.29925	0.000919239	0.00307181	0.3266	0.3252	0.3259	0.000989949	0.00303759	0.2432	0.2327	0.23795	0.00742462	0.0312024
mn10	0.3229	0.323	0.32295	7.07107e-05	0.000218952	0.2869	0.2776	0.28225	0.00657609	0.0232988	0.3191	0.3181	0.3186	0.000707107	0.00221942	0.1532	0.1516	0.1524	0.00113137	0.00742369	0.2239	0.2736	0.24875	0.0351432	0.141279
mn14	0.3287	0.3418	0.33525	0.0092631	0.0276304	0.348	0.3523	0.35015	0.00304056	0.00868359	0.3541	0.3514	0.35275	0.00190919	0.0054123	0.324	0.3255	0.32475	0.00106066	0.00326608	0.3681	0.3703	0.3692	0.00155563	0.00421353
mn15	0.3483	0.3459	0.3471	0.00169706	0.00488924	0.4126	0.4091	0.41085	0.00247487	0.00602379	0.4144	0.4128	0.4136	0.00113137	0.00273542	0.3904	0.3962	0.3933	0.00410122	0.0104277	0.3524	0.3495	0.35095	0.00205061	0.00584303
mn16	0.2806	0.2886	0.2846	0.00565685	0.0198765	0.3839	0.3827	0.3833	0.000848528	0.00221374	0.3726	0.3719	0.37225	0.000494975	0.00132968	0.3256	0.3283	0.32695	0.00190919	0.00583939	0.3372	0.3269	0.33205	0.0072832	0.021934
mn22	0.2657	0.2625	0.2641	0.00226274	0.00856775	0.3051	0.3025	0.3038	0.00183848	0.00605161	0.3118	0.3162	0.314	0.00311127	0.0099085	0.2037	0.204	0.20385	0.000212132	0.00104063	0.2843	0.279	0.28165	0.00374767	0.0133061
mn24	0.2146	0.2111	0.21285	0.00247487	0.0116273	0.2308	0.2344	0.2326	0.00254558	0.010944	0.2372	0.231	0.2341	0.00438406	0.0187273	0.2535	0.2435	0.2485	0.00707107	0.028455	0.2261	0.2204	0.22325	0.00403051	0.0180538
mn2i	0.2685	0.2634	0.26595	0.00360624	0.0135599	0.3142	0.3108	0.3125	0.00240416	0.00769332	0.3271	0.3269	0.327	0.000141421	0.000432481	0.2926	0.3123	0.30245	0.01393	0.0460572	0.3462	0.3352	0.3407	0.00777817	0.02283
TOTAL			0.289655	0.00608369	0.0220513			0.322121	0.00481733	0.0150803			0.320815	0.00532773	0.0180268			0.266916	0.00671366	0.0266502			0.313778	0.0081073	0.0261437
								-0.25285	-0.0175362	-0.047471			-0.26255	-0.0243245	-0.125034			-0.2647	-0.0248902	-0.126544			-0.2273	-0.0350725	-0.141041
	T. Test: Pvalue		0.941792	no sig		T. Test: Pvalue		0.480831	no sig		T. Test: Pvalue		0.892488	no sig		T. Test: Pvalue		0.772133	no sig		T. Test: Pvalue		0.483188	no sig
	F. Test: Pvalue SD		0.162491	no sig		F. Test: Pvalue SD		0.526597	no sig		F. Test: Pvalue SD		0.738677	no sig		F. Test: Pvalue SD		0.0391676	sig		F. Test: Pvalue SD		0.508797	no sig
	F. Test: Pvalue CV		0.0216964	sig		F. Test: Pvalue CV		0.287401	no sig		F. Test: Pvalue CV		0.0279102	sig		F. Test: Pvalue CV		0.0402127	sig		F. Test: Pvalue CV		0.0276423	sig
			Top View					Right					Left					Front					Back
	T Test Value		-0.0737271					0.721724					-0.137211					-0.295408					0.717863
	F Test Value		2.18635					1.2905					1.12166					2.41964					1.30699
	CV Test Value		2.62746					2.2562					3.0241					1.98084					1.76924

## Sheet: Mean Eccentricity
	Top view front		Mean +/-SD		CV	Right side		Mean +/-SD		CV	Left side		Mean +/-SD		CV	Front		Mean +/-SD		CV	Back		Mean +/-SD		CV
Indiv	image 1	image 2	mean	sd		Image 1	Image2	mean	sd		Image 1	Image2	mean	sd		Image 1	Image2	mean	sd		Image 1	Image2	mean	sd
17923	0.8408	0.8456	0.8432	0.00339411	0.00402528	0.801	0.8337	0.81735	0.0231224	0.0282895	0.8126	0.8293	0.82095	0.0118087	0.0143842	0.6332	0.6368	0.635	0.00254558	0.00400879	0.9206	0.9217	0.92115	0.000777817	0.000844398
20544	0.8366	0.8241	0.83035	0.00883883	0.0106447	0.8614	0.8615	0.86145	7.07107e-05	8.20833e-05	0.8064	0.7968	0.8016	0.00678823	0.00846834	0.866	0.887	0.8765	0.0148492	0.0169415	0.7313	0.7084	0.71985	0.0161927	0.0224946
22468	0.9248	0.9233	0.92405	0.00106066	0.00114784	0.8217	0.8213	0.8215	0.000282843	0.0003443	0.8586	0.8372	0.8479	0.0151321	0.0178465	0.7919	0.7938	0.79285	0.0013435	0.00169452	0.8599	0.858	0.85895	0.0013435	0.00156412
22609	0.7797	0.773	0.77635	0.00473762	0.00610242	0.8366	0.7941	0.81535	0.030052	0.0368578	0.7133	0.7131	0.7132	0.000141421	0.000198291	0.8657	0.8632	0.86445	0.00176777	0.00204496	0.7757	0.7826	0.77915	0.00487904	0.006262
22612	0.8243	0.7567	0.7905	0.0478004	0.0604686	0.8725	0.8858	0.87915	0.00940452	0.0106973	0.8382	0.8501	0.84415	0.00841457	0.0099681	0.8498	0.8816	0.8657	0.022486	0.0259744	0.8461	0.7972	0.82165	0.0345775	0.042083
22613	0.7806	0.8415	0.81105	0.0430628	0.0530951	0.8279	0.8456	0.83675	0.0125158	0.0149576	0.8641	0.8624	0.86325	0.00120208	0.00139251	0.6563	0.6746	0.66545	0.0129401	0.0194456	0.7857	0.7109	0.7483	0.0528916	0.0706823
22614	0.8333	0.8138	0.82355	0.0137886	0.0167429	0.809	0.7914	0.8002	0.0124451	0.0155525	0.8312	0.8289	0.83005	0.00162635	0.00195933	0.8674	0.8174	0.8424	0.0353553	0.0419698	0.6819	0.6743	0.6781	0.00537401	0.0079251
27761	0.8409	0.8485	0.8447	0.00537401	0.00636204	0.8555	0.8479	0.8517	0.00537401	0.00630975	0.8692	0.8708	0.87	0.00113137	0.00130043	0.8273	0.8551	0.8412	0.0196576	0.0233685	0.8541	0.6849	0.7695	0.119642	0.155481
36684	0.566	0.5586	0.5623	0.00523259	0.00930569	0.8203	0.823	0.82165	0.00190919	0.0023236	0.7882	0.7912	0.7897	0.00212132	0.00268624	0.8347	0.8747	0.8547	0.0282843	0.0330926	0.8939	0.9044	0.89915	0.00742462	0.00825738
42824	0.7666	0.7666	0.7666	0	0	0.8696	0.8705	0.87005	0.000636396	0.000731448	0.8164	0.8293	0.82285	0.00912168	0.0110855	0.8432	0.834	0.8386	0.00650538	0.00775743	0.8764	0.869	0.8727	0.00523259	0.00599586
42825	0.7945	0.7913	0.7929	0.00226274	0.00285375	0.6777	0.6669	0.6723	0.00763675	0.0113591	0.8704	0.8782	0.8743	0.00551543	0.0063084	0.893	0.8967	0.89485	0.0026163	0.00292372	0.7717	0.7631	0.7674	0.00608112	0.00792431
45769	0.7579	0.758	0.75795	7.07107e-05	9.3292e-05	0.9254	0.9236	0.9245	0.00127279	0.00137674	0.8332	0.8469	0.84005	0.00968736	0.0115319	0.8714	0.8746	0.873	0.00226274	0.00259191	0.8845	0.8858	0.88515	0.000919239	0.00103851
45779	0.7506	0.7658	0.7582	0.010748	0.0141757	0.8009	0.7802	0.79055	0.0146371	0.0185151	0.8159	0.8026	0.80925	0.00940452	0.0116213	0.816	0.8842	0.8501	0.0482247	0.0567282	0.7096	0.7537	0.73165	0.0311834	0.0426207
49607	0.719	0.7171	0.71805	0.0013435	0.00187104	0.798	0.7738	0.7859	0.017112	0.0217737	0.7746	0.7591	0.76685	0.0109602	0.0142924	0.8738	0.8888	0.8813	0.0106066	0.0120352	0.6964	0.6744	0.6854	0.0155563	0.0226967
52615	0.755	0.772	0.7635	0.0120208	0.0157444	0.7892	0.806	0.7976	0.0118794	0.0148939	0.8056	0.805	0.8053	0.000424264	0.00052684	0.8527	0.8713	0.862	0.0131522	0.0152578	0.7339	0.6715	0.7027	0.0441235	0.0627913
65908	0.76	0.7605	0.76025	0.000353553	0.000465049	0.7851	0.8018	0.79345	0.0118087	0.0148827	0.7851	0.7667	0.7759	0.0130108	0.0167686	0.8467	0.8717	0.8592	0.0176777	0.0205746	0.7703	0.8105	0.7904	0.0284257	0.0359637
139661	0.6551	0.6539	0.6545	0.000848528	0.00129645	0.8748	0.8775	0.87615	0.00190919	0.00217907	0.8407	0.8076	0.82415	0.0234052	0.0283992	0.8695	0.9122	0.89085	0.0301935	0.0338929	0.8991	0.9099	0.9045	0.00763675	0.00844307
141485	0.6894	0.826	0.7577	0.0965908	0.127479	0.8276	0.8655	0.84655	0.0267993	0.0316571	0.7684	0.7808	0.7746	0.00876812	0.0113196	0.7593	0.7614	0.76035	0.00148492	0.00195295	0.8692	0.8743	0.87175	0.00360624	0.00413679
203066	0.8457	0.8406	0.84315	0.00360624	0.00427711	0.814	0.8849	0.84945	0.0501339	0.0590192	0.9146	0.8776	0.8961	0.026163	0.0291965	0.8335	0.8224	0.82795	0.00784889	0.0094799	0.7683	0.7217	0.745	0.0329512	0.0442298
203309	0.7925	0.8328	0.81265	0.0284964	0.035066	0.773	0.6973	0.73515	0.053528	0.0728123	0.8041	0.8184	0.81125	0.0101116	0.0124643	0.9251	0.9174	0.92125	0.00544472	0.00591015	0.8111	0.7452	0.77815	0.0465983	0.0598835
288185	0.7868	0.8402	0.8135	0.0377595	0.0464161	0.8395	0.7534	0.79645	0.0608819	0.0764416	0.8256	0.8256	0.8256	0	0	0.755	0.7755	0.76525	0.0144957	0.0189424	0.8043	0.7848	0.79455	0.0137886	0.017354
288186	0.8803	0.8781	0.8792	0.00155563	0.00176938	0.8359	0.8405	0.8382	0.00325269	0.00388057	0.7883	0.782	0.78515	0.00445477	0.00567379	0.8495	0.856	0.85275	0.00459619	0.00538985	0.8662	0.8605	0.86335	0.00403051	0.00466845
288187	0.7745	0.73	0.75225	0.0314663	0.0418295	0.8001	0.7604	0.78025	0.0280721	0.0359784	0.8609	0.8537	0.8573	0.00509117	0.00593861	0.7554	0.7735	0.76445	0.0127986	0.0167423	0.7491	0.8074	0.77825	0.0412243	0.0529705
288189	0.6705	0.7138	0.69215	0.0306177	0.0442357	0.7936	0.7761	0.78485	0.0123744	0.0157665	0.8687	0.8661	0.8674	0.00183848	0.00211953	0.8013	0.8407	0.821	0.02786	0.0339342	0.8483	0.8557	0.852	0.00523259	0.00614154
288199	0.7915	0.8019	0.7967	0.00735391	0.00923046	0.8776	0.866	0.8718	0.00820244	0.00940862	0.8843	0.8749	0.8796	0.0066468	0.00755662	0.7872	0.8105	0.79885	0.0164756	0.0206241	0.7934	0.8207	0.80705	0.019304	0.0239192
288210	0.8069	0.7623	0.7846	0.031537	0.040195	0.9327	0.9422	0.93745	0.00671751	0.00716573	0.8612	0.8725	0.86685	0.00799031	0.00921763	0.874	0.8449	0.85945	0.0205768	0.0239418	0.7323	0.7718	0.75205	0.0279307	0.0371394
324296	0.7835	0.7679	0.7757	0.0110309	0.0142205	0.8154	0.8147	0.81505	0.000494975	0.000607294	0.8232	0.8117	0.81745	0.00813173	0.00994768	0.8843	0.8629	0.8736	0.0151321	0.0173215	0.8477	0.8992	0.87345	0.036416	0.0416921
326308	0.7673	0.7437	0.7555	0.0166877	0.0220883	0.9218	0.9159	0.91885	0.00417193	0.00454038	0.914	0.9144	0.9142	0.000282843	0.000309388	0.9449	0.9444	0.94465	0.000353553	0.000374269	0.8448	0.8804	0.8626	0.025173	0.0291827
497193	0.7044	0.7532	0.7288	0.0345068	0.0473474	0.8843	0.8845	0.8844	0.000141421	0.000159907	0.821	0.8216	0.8213	0.000424264	0.000516576	0.8474	0.8403	0.84385	0.00502046	0.00594947	0.7267	0.7443	0.7355	0.0124451	0.0169206
497202	0.8189	0.764	0.79145	0.0388202	0.0490494	0.7725	0.7895	0.781	0.0120208	0.0153916	0.8161	0.828	0.82205	0.00841457	0.0102361	0.7665	0.7814	0.77395	0.0105359	0.0136131	0.6937	0.6625	0.6781	0.0220617	0.0325346
497203	0.7799	0.7799	0.7799	0	0	0.8918	0.9094	0.9006	0.0124451	0.0138187	0.8302	0.8408	0.8355	0.00749533	0.00897107	0.8379	0.7967	0.8173	0.0291328	0.0356452	0.7899	0.7589	0.7744	0.0219203	0.0283062
497237	0.7927	0.8239	0.8083	0.0220617	0.027294	0.7989	0.8508	0.82485	0.0366988	0.0444915	0.86	0.8564	0.8582	0.00254558	0.00296619	0.8748	0.8535	0.86415	0.0150614	0.0174291	0.8543	0.7967	0.8255	0.0407294	0.049339
497243	0.7637	0.7361	0.7499	0.0195161	0.026025	0.8745	0.8919	0.8832	0.0123037	0.0139308	0.8869	0.8857	0.8863	0.000848528	0.000957383	0.8529	0.8624	0.85765	0.00671751	0.00783247	0.6955	0.7986	0.74705	0.0729027	0.0975875
497248	0.8015	0.6925	0.747	0.0770746	0.103179	0.879	0.8595	0.86925	0.0137886	0.0158626	0.7946	0.7946	0.7946	0	0	0.7939	0.794	0.79395	7.07107e-05	8.90619e-05	0.7273	0.7695	0.7484	0.0298399	0.0398716
497251	0.8261	0.8231	0.8246	0.00212132	0.00257254	0.8169	0.8159	0.8164	0.000707107	0.000866128	0.7831	0.7939	0.7885	0.00763675	0.00968517	0.8861	0.952	0.91905	0.0465983	0.0507027	0.8622	0.8622	0.8622	0	0
497252	0.7326	0.7501	0.74135	0.0123744	0.0166917	0.8114	0.7816	0.7965	0.0210718	0.0264555	0.8238	0.8249	0.82435	0.000777817	0.000943552	0.7414	0.7392	0.7403	0.00155563	0.00210136	0.9221	0.9265	0.9243	0.00311127	0.00336608
497261	0.6724	0.7176	0.695	0.0319612	0.0459874	0.837	0.7571	0.79705	0.0564978	0.0708837	0.8289	0.8661	0.8475	0.0263044	0.0310376	0.7848	0.6851	0.73495	0.0704985	0.0959229	0.831	0.8416	0.8363	0.00749533	0.00896249
497272	0.8049	0.7258	0.76535	0.0559321	0.0730805	0.7664	0.7456	0.756	0.0147078	0.0194548	0.7156	0.6919	0.70375	0.0167584	0.023813	0.9622	0.9626	0.9624	0.000282843	0.000293893	0.9427	0.8853	0.914	0.0405879	0.0444069
497276	0.8846	0.8819	0.88325	0.00190919	0.00216155	0.8961	0.9112	0.90365	0.0106773	0.0118158	0.8815	0.887	0.88425	0.00388909	0.00439818	0.8913	0.8899	0.8906	0.000989949	0.00111155	0.8562	0.8939	0.87505	0.0266579	0.0304645
497302	0.8631	0.8681	0.8656	0.00353553	0.00408449	0.6194	0.7988	0.7091	0.126855	0.178896	0.7503	0.8088	0.77955	0.0413657	0.0530636	0.6294	0.8148	0.7221	0.131098	0.18155	0.9194	0.9203	0.91985	0.000636396	0.000691848
519611	0.891	0.8853	0.88815	0.00403051	0.00453809	0.843	0.8392	0.8411	0.00268701	0.00319463	0.8463	0.8184	0.83235	0.0197283	0.0237019	0.8735	0.9425	0.908	0.0487904	0.0537339	0.6962	0.8175	0.75685	0.0857721	0.113328
519622	0.8574	0.6759	0.76665	0.12834	0.167403	0.8576	0.842	0.8498	0.0110309	0.0129805	0.7032	0.8411	0.77215	0.09751	0.126284	0.941	0.9393	0.94015	0.00120208	0.00127861	0.6555	0.5557	0.6056	0.0705693	0.116528
575054	0.7733	0.7749	0.7741	0.00113137	0.00146153	0.8658	0.8513	0.85855	0.010253	0.0119423	0.8959	0.9013	0.8986	0.00381838	0.00424925	0.8586	0.8179	0.83825	0.0287792	0.0343325	0.8244	0.8205	0.82245	0.00275772	0.00335305	Average Smithsonian	top	right	left	front	back
mn1	0.8097	0.8102	0.80995	0.000353553	0.000436513	0.8602	0.86	0.8601	0.000141421	0.000164424	0.7901	0.8234	0.80675	0.0235467	0.0291871	0.9115	0.9231	0.9173	0.00820244	0.00894194	0.8063	0.8696	0.83795	0.0447599	0.0534159	CV	0.0276337	0.0217889	0.0128676	0.0227094	0.0327918
mn2	0.8571	0.868	0.86255	0.00770746	0.00893567	0.8802	0.8802	0.8802	0	0	0.8269	0.8451	0.836	0.0128693	0.015394	0.8792	0.8784	0.8788	0.000565685	0.000643702	0.7675	0.7742	0.77085	0.00473762	0.00614596	Average Field
mn3	0.7861	0.7945	0.7903	0.0059397	0.00751575	0.835	0.85	0.8425	0.0106066	0.0125894	0.7814	0.782	0.7817	0.000424264	0.000542745	0.805	0.7779	0.79145	0.0191626	0.024212	0.883	0.9014	0.8922	0.0130108	0.0145828	CV	0.0112432	0.0173148	0.0176844	0.0216255	0.0346157
mn8	0.6926	0.6947	0.69365	0.00148492	0.00214074	0.7596	0.7768	0.7682	0.0121622	0.0158321	0.8182	0.7975	0.80785	0.0146371	0.0181186	0.7633	0.8418	0.80255	0.0555079	0.0691644	0.7446	0.7381	0.74135	0.00459619	0.00619976
mn9	0.85	0.8358	0.8429	0.0100409	0.0119123	0.644	0.68	0.662	0.0254558	0.0384529	0.7508	0.7427	0.74675	0.00572756	0.00766999	0.8189	0.8923	0.8556	0.0519016	0.0606611	0.7905	0.7956	0.79305	0.00360624	0.00454731
mn10	0.7886	0.7857	0.78715	0.00205061	0.00260511	0.7845	0.7854	0.78495	0.000636396	0.000810747	0.788	0.8305	0.80925	0.030052	0.0371357	0.7925	0.7958	0.79415	0.00233345	0.0029383	0.7558	0.8467	0.80125	0.064276	0.0802197
mn14	0.8259	0.8383	0.8321	0.00876812	0.0105373	0.7465	0.7423	0.7444	0.00296985	0.00398959	0.8367	0.7942	0.81545	0.030052	0.0368533	0.8763	0.8668	0.87155	0.00671751	0.00770755	0.6073	0.6221	0.6147	0.0104652	0.0170249
mn15	0.8404	0.8468	0.8436	0.00452548	0.00536449	0.8801	0.8916	0.88585	0.00813173	0.00917958	0.9473	0.9405	0.9439	0.00480833	0.00509411	0.806	0.8417	0.82385	0.0252437	0.0306412	0.8894	0.797	0.8432	0.0653367	0.0774866
mn16	0.7207	0.7131	0.7169	0.00537401	0.00749618	0.7138	0.6333	0.67355	0.0569221	0.0845106	0.7789	0.7911	0.785	0.0086267	0.0109894	0.8766	0.8717	0.87415	0.00346482	0.00396365	0.8717	0.8773	0.8745	0.0039598	0.00452807
mn22	0.7471	0.8008	0.77395	0.0379716	0.0490621	0.8324	0.8208	0.8266	0.00820244	0.00992311	0.8287	0.8103	0.8195	0.0130108	0.0158765	0.9001	0.9083	0.9042	0.00579828	0.0064126	0.8866	0.8889	0.88775	0.00162635	0.00183199
mn24	0.7468	0.7621	0.75445	0.0108187	0.0143399	0.8336	0.8278	0.8307	0.00410122	0.00493706	0.7492	0.7911	0.77015	0.0296278	0.0384701	0.8128	0.8461	0.82945	0.0235467	0.0283883	0.6543	0.7889	0.7216	0.0951766	0.131897
mn2i	0.7795	0.7636	0.77155	0.011243	0.014572	0.8297	0.8418	0.83575	0.00855599	0.0102375	0.7294	0.7381	0.73375	0.00615183	0.00838409	0.9189	0.923	0.92095	0.00289914	0.00314799	0.6828	0.6661	0.67445	0.0118087	0.0175086
total			0.784174	0.0181315	0.0235817			0.822835	0.0162995	0.0208941			0.821817	0.0113896	0.0141276			0.840879	0.0181675	0.0222423			0.79986	0.025443	0.0331897
	T. Test: Pvalue		0.685819	no diff		T. Test: Pvalue		0.219379	no diff		T. Test: Pvalue		0.213093	no diff		T. Test: Pvalue		0.292321	no diff		T. Test: Pvalue		0.585137	no diff
	F. Test: Pvalue SD		0.439004	no diff		F. Test: Pvalue SD		0.164219	no diff		F. Test: Pvalue SD		0.474201	no diff		F. Test: Pvalue SD		0.146092	no diff		F. Test: Pvalue SD		0.55093	no diff
	F. Test: Pvalue CV		0.000773843	sig dif		F. Test: Pvalue CV		0.333942	no diff		F. Test: Pvalue CV		0.126214	no diff		F. Test: Pvalue CV		0.274906	no diff		F. Test: Pvalue CV		0.3945	no diff
			Top View					Right					Left					Front					Back
	T Test Value		-0.410052					1.28349					1.29721					-1.07443					0.55703
	F Test Value		1.5519					1.81389					1.34046					2.25866					1.26868
	CV Test Value		7.71406					2.10748					2.24282					1.54576					1.53748

## Sheet: Average Area of Objects
	Top view front		Mean +/-SD		CV	Right side		Mean +/-SD		CV	Left side		Mean +/-SD		CV	Front		Mean +/-SD		CV	Back		Mean +/-SD		CV
Indiv	image 1	image 2	mean	sd		Image 1	Image2	mean	sd		Image 1	Image2	mean	sd		Image 1	Image2	mean	sd		Image 1	Image2	mean	sd
17923	216.45	211.429	213.939	3.55003	0.0165936	27.8348	24.636	26.2354	2.26189	0.0862153	52.1971	52.8967	52.5469	0.494692	0.00941429	17.0091	23.7339	20.3715	4.75515	0.233422	125.55	131.178	128.364	3.97953	0.0310018
20544	40.9766	38.6538	39.8152	1.64247	0.0412523	33.642	43.1554	38.3987	6.72699	0.175188	32.6952	29.2651	30.9802	2.42545	0.0782904	20.6519	21.4142	21.0331	0.539027	0.0256276	42.3531	26.1907	34.2719	11.4285	0.333467
22468	105.695	108.762	107.228	2.16848	0.020223	139.899	150.57	145.234	7.5449	0.0519498	291.386	145.132	218.259	103.417	0.473828	52.5982	54.9254	53.7618	1.64558	0.0306087	120.383	144.368	132.375	16.9602	0.128122
22609	34.5598	37.7657	36.1628	2.26691	0.0626864	40.8834	38.0416	39.4625	2.00946	0.0509206	23.085	22.5901	22.8376	0.349947	0.0153233	11.6177	12.8449	12.2313	0.867761	0.070946	23.3837	25.1602	24.272	1.25618	0.0517542
22612	25.5456	22.7147	24.1302	2.00175	0.0829563	17.7556	18.8881	18.3219	0.800798	0.0437073	39.1498	27.7966	33.4732	8.02792	0.239831	7.4742	6.2691	6.87165	0.852134	0.124007	44.8269	42.571	43.6989	1.59516	0.0365034
22613	34.9319	26.8232	30.8775	5.73372	0.185692	18.6332	17.4595	18.0463	0.829931	0.0459889	15.3619	15.3242	15.343	0.0266579	0.00173746	18.7444	24.7964	21.7704	4.27941	0.19657	84.5077	103.767	94.1373	13.6183	0.144664
22614	39.809	44.9753	42.3922	3.65313	0.0861746	21.7859	28.7654	25.2756	4.93525	0.195257	24.8166	24.5417	24.6791	0.194384	0.00787643	13.9098	14.4159	14.1629	0.357867	0.025268	123.65	116.419	120.035	5.11323	0.042598
27761	25.6104	18.8284	22.2194	4.7956	0.215829	17.5298	16.722	17.1259	0.571201	0.033353	16.8436	18.4997	17.6716	1.17104	0.0662666	10.269	11.4419	10.8555	0.829366	0.0764008	52.846	114.7	83.7729	43.7372	0.522093
36684	68.6904	60.7348	64.7126	5.62546	0.0869299	29.5666	31.8118	30.6892	1.5876	0.0517314	39.6091	33.981	36.7951	3.97967	0.108158	20.5147	19.1535	19.8341	0.962514	0.0485282	31.5945	36.9293	34.2619	3.77227	0.110101
42824	55.5264	46.1806	50.8535	6.60848	0.129951	41.2923	41.279	41.2857	0.00940452	0.000227792	47.9889	39.2679	43.6284	6.16668	0.141346	23.9717	17.3333	20.6525	4.69406	0.227288	49.9058	62.5035	56.2047	8.90792	0.158491
42825	67.6139	68.1042	67.859	0.346694	0.00510904	82.0646	78.2081	80.1363	2.72696	0.034029	69.8574	88.3231	79.0902	13.0572	0.165093	32.1447	33.1156	32.6302	0.68653	0.0210397	125.279	130.39	127.835	3.61416	0.0282721
45769	80.3095	80.321	80.3152	0.00813173	0.000101248	48.8123	48.4532	48.6328	0.253922	0.00522122	31.26	30.9599	31.11	0.212203	0.00682106	21.8386	21.4248	21.6317	0.292601	0.0135265	43.0942	43.6714	43.3828	0.408142	0.00940792
45779	37.398	37.8384	37.6182	0.31141	0.00827817	20.426	18.5538	19.4899	1.32385	0.0679247	16.1813	17.745	16.9631	1.1057	0.0651826	21.3239	13.4612	17.3925	5.55977	0.319664	81.7078	75.1029	78.4053	4.67037	0.059567
49607	47.1074	43.1929	45.1501	2.76797	0.0613059	28.17	32.0821	30.126	2.76627	0.0918233	20.0066	21.2709	20.6388	0.893995	0.0433163	14.5371	15.0575	14.7973	0.367978	0.0248679	64.6577	65.1259	64.8918	0.331067	0.00510184
52615	28.9797	30.9873	29.9835	1.41959	0.0473456	27.8828	27.4324	27.6576	0.318481	0.0115151	21.9737	22.5115	22.2426	0.380282	0.017097	20.0482	17.631	18.8396	1.70922	0.0907248	96.2174	62.0593	79.1384	24.1534	0.305205
65908	20.9705	21.0064	20.9885	0.0253851	0.00120948	18.9526	22.5791	20.7659	2.56432	0.123487	23.1788	20.3064	21.7426	2.03109	0.0934154	12.1022	13.0101	12.5561	0.641982	0.0511289	16.1694	16.4432	16.3063	0.193606	0.0118731
139661	51.5813	39.1405	45.3609	8.79697	0.193933	80.7682	85.3814	83.0748	3.26203	0.0392661	64.2863	102.124	83.2052	26.7553	0.321558	17.2342	29.6443	23.4393	8.77527	0.374383	13.9478	19.9629	16.9554	4.25332	0.250854
141485	15.012	18.9536	16.9828	2.78713	0.164115	20.9698	27.0779	24.0238	4.31908	0.179783	16.9781	16.004	16.4911	0.688793	0.0417677	21.4612	22.3035	21.8824	0.595596	0.0272181	12.9778	11.4294	12.2036	1.09488	0.0897181
203066	24.1405	27.3812	25.7608	2.29152	0.0889536	20.3757	22.7982	21.587	1.71297	0.0793519	30.401	55.1341	42.7675	17.4889	0.40893	15.664	14.291	14.9775	0.970858	0.0648211	37.4842	31.1312	34.3077	4.49225	0.13094
203309	51.9534	39.0103	45.4819	9.15215	0.201227	22.9621	26.1488	24.5555	2.25334	0.0917653	25.3162	30.0542	27.6852	3.35027	0.121013	35.0232	29.6908	32.357	3.77058	0.11653	99.7197	41.2628	70.4913	41.3353	0.586389
288185	66.8436	44.7932	55.8184	15.592	0.279334	59.6471	37.0731	48.3601	15.9622	0.33007	26.3542	20.1891	23.2717	4.35938	0.187326	20.8223	28.6715	24.7469	5.55022	0.22428	20.5967	22.7766	21.6867	1.54142	0.071077
288186	75.5807	59.0444	67.3126	11.6929	0.173711	29.6623	35.7095	32.6859	4.27602	0.130821	26.9177	30.2649	28.5913	2.36683	0.0827814	27.2214	34.3122	30.7668	5.01395	0.162966	92.8953	94.5939	93.7446	1.20109	0.0128124
288187	17.3585	17.05	17.2043	0.218142	0.0126796	28.8481	21.1717	25.0099	5.42803	0.217035	27.0991	23.3261	25.2126	2.66791	0.105817	17.509	21.8208	19.6649	3.0489	0.155043	32.9429	31.5423	32.2426	0.990374	0.0307163
288189	43.8178	36.482	40.1499	5.18719	0.129196	24.8927	29.3318	27.1123	3.13892	0.115775	34.6633	29.8211	32.2422	3.42395	0.106195	24.9092	36.9951	30.9521	8.54602	0.276104	80.1556	79.2748	79.7152	0.62282	0.00781306
288199	25.244	31.4458	28.3449	4.38533	0.154713	14.4268	15.8316	15.1292	0.993344	0.0656574	26.6378	30.6404	28.6391	2.83027	0.0988252	8.633	12.8014	10.7172	2.9475	0.275026	54.1121	69.9361	62.0241	11.1893	0.180402
288210	20.1236	29.0264	24.575	6.29523	0.256164	41.1217	48.5149	44.8183	5.22778	0.116644	63.1155	64.1953	63.6554	0.763534	0.0119948	19.8203	27.7356	23.778	5.59696	0.235385	87.9045	89.6047	88.7546	1.20222	0.0135455
324296	68.8396	74.0269	71.4333	3.66798	0.0513483	35.1091	39.9492	37.5292	3.42247	0.0911949	38.4359	43.4553	40.9456	3.54925	0.0866821	18.0625	14.0535	16.058	2.83479	0.176535	30.0169	57.0884	43.5526	19.1424	0.439524
326308	100.073	93.3389	96.7058	4.76152	0.0492371	47.2252	36.0983	41.6617	7.86791	0.188852	71.0005	70.9084	70.9545	0.0651245	0.000917836	32.1911	31.5248	31.8579	0.471145	0.0147889	59.9375	124.251	92.0942	45.4764	0.493804
497193	24.617	21.3142	22.9656	2.33543	0.101693	32.2558	33.9209	33.0884	1.1774	0.0355836	20.0876	20.7959	20.4417	0.500844	0.024501	18.0863	12.1788	15.1326	4.17723	0.276043	20.4215	24.809	22.6153	3.10243	0.137183
497202	38.4651	56.5172	47.4912	12.7648	0.268782	18.9668	19.248	19.1074	0.198838	0.0104064	23.7541	23.7915	23.7728	0.0264458	0.00111244	42.0224	66.9308	54.4766	17.6129	0.323311	66.2424	77.2506	71.7465	7.78397	0.108493
497203	27.5651	23.5482	25.5567	2.84038	0.11114	51.1175	25.9309	38.5242	17.8096	0.462297	15.8422	16.5548	16.1985	0.503884	0.0311068	11.5398	13.6963	12.6181	1.52488	0.120849	21.08	27.0003	24.0401	4.18628	0.174137
497237	17.2401	22.3075	19.7738	3.58319	0.181209	32.3519	27.2001	29.776	3.64287	0.122343	94.1778	57.1784	75.6781	26.1625	0.345708	15.3287	16.9106	16.1197	1.11857	0.0693918	48.0891	32.6093	40.3492	10.9459	0.271279
497243	31.4731	27.2624	29.3678	2.97741	0.101384	33.4649	39.968	36.7165	4.59839	0.12524	48.0009	48.894	48.4475	0.631517	0.0130351	17.0607	21.4447	19.2527	3.09996	0.161014	30.6445	45.7407	38.1926	10.6746	0.279495
497248	64.2269	56.6713	60.4491	5.34262	0.0883821	24.0134	24.9204	24.4669	0.641346	0.0262128	35.0215	35.5315	35.2765	0.360624	0.0102228	21.0063	21.1583	21.0823	0.10748	0.00509813	73.6571	50.5812	62.1192	16.3171	0.262675
497251	122.75	63.6569	93.2035	41.7852	0.448322	28.2048	30.482	29.3434	1.61022	0.0548752	65.7377	82.7873	74.2625	12.0559	0.162342	44.3536	34.5905	39.472	6.90355	0.174897	172.603	185.249	178.926	8.94214	0.0499768
497252	17.9012	21.0624	19.4818	2.23531	0.114738	19.3715	17.4614	18.4165	1.35064	0.073339	19.0463	23.3058	21.1761	3.01192	0.142232	13.1955	8.1228	10.6592	3.58694	0.336513	46.4004	32.9665	39.6835	9.4992	0.239374
497261	39.3076	29.9358	34.6217	6.62686	0.191408	41.9375	37.0929	39.5152	3.42565	0.0866919	67.9898	46.3968	57.1933	15.2686	0.266964	12.5486	18.6636	15.6061	4.32396	0.277068	185.503	212.364	198.934	18.9932	0.0954749
497272	90.0537	103.195	96.6245	9.29259	0.0961721	38.0948	33.8718	35.9833	2.98611	0.0829861	62.5135	61.3516	61.9325	0.821587	0.0132658	36.4034	37.944	37.1737	1.08937	0.0293048	44.862	93.3739	69.118	34.3031	0.496298
497276	27.4076	31.9862	29.6969	3.23756	0.10902	23.3635	23.3616	23.3625	0.0013435	5.75067e-05	26.7253	25.6518	26.1885	0.759079	0.0289852	8.2527	7.8835	8.0681	0.261064	0.0323575	14.2658	17.4611	15.8635	2.25942	0.142429
497302	98.9003	96.845	97.8726	1.45332	0.0148491	74.298	70.7447	72.5213	2.51256	0.0346458	147.439	71.4652	109.452	53.7217	0.490824	23.6915	23.7849	23.7382	0.0660438	0.00278217	89.0163	88.8005	88.9084	0.152594	0.0017163
519611	10.3242	11.5791	10.9517	0.887348	0.0810242	13.9621	15.432	14.6971	1.03938	0.0707201	13.1184	17.7678	15.4431	3.28762	0.212886	9.281	5.8792	7.5801	2.40544	0.317336	37.1694	32.1544	34.6619	3.54614	0.102307
519622	156.096	149.105	152.6	4.94345	0.0323948	39.3234	38.9926	39.158	0.233911	0.00597352	24.4566	23.3326	23.8946	0.794788	0.0332622	16.9474	16.5175	16.7325	0.303985	0.0181674	56.8144	31.2014	44.0079	18.1111	0.411543
575054	36.8683	35.0298	35.949	1.30002	0.0361627	19.4928	22.614	21.0534	2.20702	0.10483	29.653	33.1678	31.4104	2.48534	0.0791247	11.3088	12.7638	12.0363	1.02884	0.0854781	34.6156	35.1754	34.8955	0.395838	0.0113435	Average Smithsonian	top	right	left	front	back
mn1	53.6216	53.8063	53.7139	0.130603	0.00243145	43.485	36.9039	40.1945	4.65354	0.115776	43.5414	74.1058	58.8236	21.6123	0.367409	10.0372	9.5525	9.79485	0.342735	0.0349913	74.5856	46.7752	60.6804	19.6649	0.324074	CV	0.113018	0.0937894	0.115404	0.137496	0.164408
mn2	25.6895	29.0094	27.3494	2.34752	0.0858344	33.2616	33.2616	33.2616	0	0	27.0583	26.5428	26.8006	0.364514	0.013601	27.2459	28.7573	28.0016	1.06872	0.0381664	37.7905	46.2517	42.0211	5.98297	0.14238	Average Field
mn3	22.0862	20.7889	21.4376	0.91733	0.0427908	21.2593	24.4146	22.837	2.23113	0.0976984	17.0923	23.0103	20.0513	4.18466	0.208698	12.5729	16.2247	14.3988	2.58221	0.179335	41.8005	44.5547	43.1776	1.94751	0.0451047	CV	0.0348044	0.0825028	0.0698445	0.0956813	0.090609
mn8	31.4243	30.4967	30.9605	0.655912	0.0211855	33.8933	33.042	33.4677	0.60196	0.0179863	26.6517	26.4008	26.5263	0.177413	0.00668821	15.943	19.8137	17.8784	2.737	0.15309	30.4779	31.2457	30.8618	0.542917	0.0175919
mn9	81.8182	83.2732	82.5457	1.02884	0.0124639	71.1881	48.0414	59.6148	16.3672	0.274549	57.107	91.2696	74.1883	24.1566	0.325612	24.5723	31.0327	27.8025	4.56819	0.164309	80.5837	84.3079	82.4458	2.63341	0.0319411
mn10	46.5548	53.2637	49.9093	4.74391	0.0950507	38.6006	41.0454	39.823	1.72873	0.0434105	54.2506	59.4073	56.8289	3.64634	0.0641634	8.3255	8.9503	8.6379	0.4418	0.0511467	17.7166	27.0176	22.3671	6.5768	0.294039
mn14	29.5945	26.1187	27.8566	2.45776	0.0882291	23.8098	27.5877	25.6988	2.67138	0.10395	21.3122	21.1577	21.2349	0.109248	0.00514473	24.7782	25.3183	25.0482	0.381908	0.0152469	56.3976	55.7148	56.0562	0.482813	0.00861301
mn15	31.0887	31.1175	31.1031	0.0203647	0.000654747	66.614	93.2278	79.9209	18.8188	0.235468	58.7041	58.9427	58.8234	0.168716	0.00286817	18.7598	21.946	20.3529	2.25298	0.110696	130.199	130.831	130.515	0.446821	0.00342352
mn16	36.5977	37.1968	36.8972	0.423628	0.0114813	53.1897	55.1327	54.1612	1.37391	0.025367	31.5467	33.3925	32.4696	1.30518	0.0401969	18.1521	19.2335	18.6928	0.764665	0.0409069	17.664	18.8835	18.2737	0.862317	0.0471888
mn22	27.0901	28.0386	27.5643	0.670691	0.0243318	52.4253	56.7726	54.599	3.07401	0.0563015	43.788	49.9143	46.8511	4.33195	0.0924619	25.3423	23.4891	24.4157	1.31041	0.0536708	114.675	120.092	117.384	3.83004	0.0326284
mn24	26.0619	26.9289	26.4954	0.613062	0.0231384	29.5351	31.2839	30.4095	1.23659	0.0406645	21.7655	21.7842	21.7749	0.0132229	0.000607255	35.2159	28.5127	31.8643	4.73988	0.148752	48.3467	58.462	53.4044	7.1526	0.133933
mn2i	25.4555	25.8203	25.6379	0.257953	0.0100614	50.1996	51.0686	50.6341	0.614476	0.0121356	50.2215	50.8108	50.5161	0.416698	0.00824881	25.1515	28.863	27.0072	2.62443	0.0971749	80.2465	80.975	80.6107	0.515127	0.00639031
total			48.4991	4.24775	0.0945561			37.3233	3.48913	0.0915321			41.9513	7.14769	0.110874			21.1679	2.7016	0.127269			63.8361	8.65695	0.148306
								-130.537	-18.8188	-0.462297			-202.916	-103.404	-0.490216			-47.605	-17.5469	-0.371601			-186.73	-45.3238	-0.584672
43
	T. Test: Pvalue		0.0624889	sig diff		T. Test: Pvalue		0.181393	no diff		T. Test: Pvalue		0.905513	no diff		T. Test: Pvalue		0.996291	no diff		T. Test: Pvalue		0.806875	no diff
	F. Test: Pvalue SD		0.00600522	sig diff		F. Test: Pvalue SD		0.230319	no diff		F. Test: Pvalue SD		0.0256818	sig diff		F. Test: Pvalue SD		0.194864	no diff		F. Test: Pvalue SD		0.504535	no diff
	F. Test: Pvalue CV		0.00140378	sig diff		F. Test: Pvalue CV		0.941475	no diff		F. Test: Pvalue CV		0.845195	no diff		F. Test: Pvalue CV		0.0241912	sig diff		F. Test: Pvalue CV		0.185126	no diff
			Top View					Right					Left					Front					Back
	T Test Value		1.91347					-1.37579					0.119561					0.00469437					0.247576
	F Test Value		5.09739					1.95602					3.6188					2.06515					1.46718
	CV Test Value		24.1066					2.9681					4.43429					4.51012					4.7727

## Sheet: Peak Length
	Top view front		Mean +/-SD		CV	Right side		Mean +/-SD		CV	Left side		Mean +/-SD		CV	Front		Mean +/-SD		CV	Back		Mean +/-SD		CV
Indiv	image 1	image 2	mean	sd		Image 1	Image2	mean	sd		Image 1	Image2	mean	sd		Image 1	Image2	mean	sd		Image 1	Image2	mean	sd
17923	7.3926	8.2178	7.8052	0.583505	0.0747584	5.5616	5.3396	5.4506	0.156978	0.0288001	4.6744	4.9112	4.7928	0.167443	0.0349363	4.0504	4.4264	4.2384	0.265872	0.0627294	5.5114	5.8521	5.68175	0.240911	0.0424009
20544	6.5051	6.2449	6.375	0.183989	0.028861	4.7906	4.9399	4.86525	0.105571	0.021699	4.5897	4.4321	4.5109	0.11144	0.0247046	4.9594	5.0922	5.0258	0.0939038	0.0186843	5.3593	5.2061	5.2827	0.108329	0.0205063
22468	8.4945	8.7234	8.60895	0.161857	0.018801	6.7579	6.9246	6.84125	0.117875	0.01723	7.5381	7.2116	7.37485	0.23087	0.0313051	5.0711	5.6159	5.3435	0.385232	0.0720935	6.2615	7.7678	7.01465	1.06511	0.151841
22609	6.4444	6.3101	6.37725	0.0949644	0.0148911	5.1606	5.1869	5.17375	0.0185969	0.00359447	4.7875	4.9112	4.84935	0.0874691	0.0180373	5.1331	5.5076	5.32035	0.264811	0.0497733	4.6352	4.878	4.7566	0.171686	0.0360942
22612	6.0079	5.8385	5.9232	0.119784	0.0202228	4.7658	4.8177	4.79175	0.0366988	0.00765876	4.0469	4.1997	4.1233	0.108046	0.0262037	4.1868	5.0234	4.6051	0.591566	0.128459	6.6297	6.0579	6.3438	0.404324	0.0637352
22613	6.2371	6.6784	6.45775	0.312046	0.0483212	5.3998	5.2706	5.3352	0.0913582	0.0171237	5.3479	5.5112	5.42955	0.115471	0.0212671	7.071	8.2706	7.6708	0.848245	0.110581	6.0251	6.4507	6.2379	0.300945	0.0482445
22614	7.3584	7.3959	7.37715	0.0265165	0.00359441	5.4405	5.5261	5.4833	0.0605283	0.0110387	5.1376	5.2734	5.2055	0.0960251	0.0184469	4.9157	5.4439	5.1798	0.373494	0.0721058	5.0768	5.1216	5.0992	0.0316784	0.00621242
27761	5.4094	6.8688	6.1391	1.03195	0.168095	4.8448	4.7524	4.7986	0.0653367	0.0136158	4.348	4.4283	4.38815	0.0567807	0.0129395	4.4041	4.6631	4.5336	0.183141	0.0403963	6.5879	6.1696	6.37875	0.295783	0.04637
36684	7.8163	9.0465	8.4314	0.869883	0.103172	5.0977	5.3299	5.2138	0.16419	0.0314915	6.4412	5.9712	6.2062	0.33234	0.0535497	4.7546	4.9054	4.83	0.106632	0.022077	5.9138	6.0549	5.98435	0.0997728	0.0166723
42824	7.2879	7.5871	7.4375	0.211566	0.0284459	5.8602	6.0445	5.95235	0.13032	0.0218938	6.0427	6.0717	6.0572	0.0205061	0.00338541	6.8084	6.1014	6.4549	0.499924	0.0774488	5.8241	5.6384	5.73125	0.13131	0.0229112
42825	10.202	9.7516	9.9768	0.318481	0.0319221	6.7042	6.7683	6.73625	0.0453255	0.0067286	6.1182	6.056	6.0871	0.043982	0.00722545	6.332	6.5804	6.4562	0.175645	0.0272057	5.7795	5.8321	5.8058	0.0371938	0.00640632
45769	9.0245	9.1125	9.0685	0.0622254	0.00686171	5.4733	5.4817	5.4775	0.0059397	0.00108438	5.3497	5.3843	5.367	0.0244659	0.00455858	5.1298	5.2205	5.17515	0.0641346	0.0123928	7.7967	7.6356	7.71615	0.113915	0.0147632
45779	7.9554	8.8077	8.38155	0.602667	0.071904	4.4147	4.4444	4.42955	0.0210011	0.00474113	4.7673	4.5832	4.67525	0.130178	0.0278441	5.8078	5.5375	5.67265	0.191131	0.0336934	7.5122	7.2866	7.3994	0.159523	0.0215589
49607	10.1045	10.0857	10.0951	0.0132936	0.00131684	5.6103	5.8084	5.70935	0.140078	0.0245348	5.616	6.0172	5.8166	0.283691	0.0487727	5.9404	5.9021	5.92125	0.0270822	0.00457373	5.4724	5.188	5.3302	0.201101	0.0377286
52615	7.7685	7.5748	7.67165	0.136967	0.0178536	4.9309	5.1001	5.0155	0.119642	0.0238545	5.4893	5.5262	5.50775	0.0260922	0.00473737	6.05	6.0098	6.0299	0.0284257	0.00471412	7.6193	6.5555	7.0874	0.75222	0.106135
65908	6.5515	6.5716	6.56155	0.0142128	0.00216608	5.2674	5.5485	5.40795	0.198768	0.0367547	5.2323	5.3097	5.271	0.0547301	0.0103832	5.3066	5.7668	5.5367	0.325411	0.0587734	4.9854	4.9184	4.9519	0.0473762	0.00956727
139661	6.6186	7.2261	6.92235	0.429567	0.0620551	4.7467	4.8096	4.77815	0.044477	0.00930842	4.5763	4.8841	4.7302	0.217647	0.0460123	5.4692	5.5596	5.5144	0.0639225	0.0115919	5.1073	4.8292	4.96825	0.196646	0.0395806
141485	8.1938	7.7198	7.9568	0.335169	0.0421235	5.3193	5.4105	5.3649	0.0644881	0.0120204	4.8396	4.7157	4.77765	0.0876105	0.0183376	5.9011	6.0741	5.9876	0.122329	0.0204305	4.4073	4.1468	4.27705	0.184201	0.0430674
203066	6.6923	6.4211	6.5567	0.191767	0.0292475	4.4566	4.6243	4.54045	0.118582	0.0261168	4.7314	4.8256	4.7785	0.0666095	0.0139394	5.5428	5.8869	5.71485	0.243315	0.042576	6.5615	5.8249	6.1932	0.520855	0.0841011
203309	9.2612	9.4219	9.34155	0.113632	0.0121642	6.2243	6.6315	6.4279	0.287934	0.0447944	6.8529	7.4392	7.14605	0.414577	0.0580148	8.3064	8.2175	8.26195	0.0628618	0.00760859	8.6245	8.8858	8.75515	0.184767	0.0211038
288185	4.9629	5.2602	5.11155	0.210223	0.041127	4.9481	5.1377	5.0429	0.134067	0.0265854	4.2387	4.49	4.36435	0.177696	0.0407153	5.6388	6.4401	6.03945	0.566605	0.0938173	4.7979	4.6884	4.74315	0.0774282	0.0163242
288186	8.1952	8.3544	8.2748	0.112571	0.0136041	5.4862	5.102	5.2941	0.27167	0.0513157	4.5574	4.7364	4.6469	0.126572	0.027238	6.0829	6.6811	6.382	0.422991	0.0662788	6.8643	6.9319	6.8981	0.0478004	0.0069295
288187	7.0181	6.3244	6.67125	0.49052	0.0735274	5.9024	5.3967	5.64955	0.357584	0.0632942	6.5983	6.1459	6.3721	0.319895	0.0502025	6.5472	6.6293	6.58825	0.0580535	0.00881167	7.5796	7.1531	7.36635	0.301581	0.0409404
288189	7.3316	8.0141	7.67285	0.4826	0.0628971	5.096	5.5118	5.3039	0.294015	0.0554337	5.6104	5.5624	5.5864	0.0339411	0.00607567	5.5117	5.8263	5.669	0.222456	0.0392407	5.8367	5.3976	5.61715	0.310491	0.0552755
288199	8.5938	8.633	8.6134	0.0277186	0.00321808	5.1383	5.1044	5.12135	0.0239709	0.00468059	5.6667	5.4915	5.5791	0.123885	0.0222052	5.3977	5.9673	5.6825	0.402768	0.0708787	5.7133	6.0797	5.8965	0.259084	0.0439386
288210	6.7363	6.1323	6.4343	0.427092	0.0663775	5.0522	4.8763	4.96425	0.12438	0.0250552	5.2943	5.3739	5.3341	0.0562857	0.0105521	5.5001	5.8198	5.65995	0.226062	0.0399406	6.2145	5.7659	5.9902	0.317208	0.0529545
324296	8.7857	9.2912	9.03845	0.357442	0.0395469	5.4934	5.5688	5.5311	0.0533159	0.00963929	5.8979	5.8273	5.8626	0.0499217	0.00851529	6.4352	5.8929	6.16405	0.383464	0.0622097	7.552	8.1468	7.8494	0.420587	0.0535821
326308	8.8923	9.6779	9.2851	0.555503	0.0598274	6.1744	5.6131	5.89375	0.396899	0.0673424	6.3947	6.4196	6.40715	0.017607	0.00274802	6.1892	5.9796	6.0844	0.14821	0.0243589	8.7363	9.9346	9.33545	0.847326	0.0907644
497193	7.7105	7.8614	7.78595	0.106702	0.0137045	5.9279	6.1678	6.04785	0.169635	0.0280488	5.9257	6.0819	6.0038	0.11045	0.0183967	5.4154	4.9939	5.20465	0.298046	0.0572652	5.4789	6.2428	5.86085	0.540159	0.0921639
497202	6.3163	5.8302	6.07325	0.343725	0.0565965	4.2757	4.1675	4.2216	0.076509	0.0181232	4.1461	4.1469	4.1465	0.000565685	0.000136425	4.9891	5.092	5.04055	0.0727613	0.0144352	5.5416	5.5971	5.56935	0.0392444	0.0070465
497203	8.7035	10.0019	9.3527	0.918107	0.098165	6.9312	6.3768	6.654	0.39202	0.0589149	6.1946	6.7543	6.47445	0.395768	0.0611276	5.634	5.9674	5.8007	0.235749	0.0406415	7.4755	6.6772	7.07635	0.564483	0.0797704
497237	5.216	5.1653	5.19065	0.0358503	0.00690671	5.6365	5.9047	5.7706	0.189646	0.0328642	6.7686	6.3677	6.56815	0.283479	0.0431597	4.961	5.0401	5.00055	0.0559321	0.0111852	5.7859	5.4978	5.64185	0.203717	0.0361083
497243	8.2541	8.5666	8.41035	0.220971	0.0262737	5.9217	5.936	5.92885	0.0101116	0.0017055	6.332	6.2484	6.2902	0.0591141	0.00939781	6.5035	7.4028	6.95315	0.635901	0.0914551	6.1214	7.2183	6.66985	0.775625	0.116288
497248	7.4423	7.1121	7.2772	0.233487	0.0320847	5.3856	5.2722	5.3289	0.0801859	0.0150474	5.7441	5.8712	5.80765	0.0898733	0.015475	5.5596	5.5819	5.57075	0.0157685	0.00283058	6.5519	6.5336	6.54275	0.0129401	0.00197777
497251	6.407	6.7408	6.5739	0.236032	0.0359044	4.6727	4.7815	4.7271	0.0769332	0.0162749	5.3568	5.4266	5.3917	0.0493561	0.00915408	5.499	5.3469	5.42295	0.107551	0.0198326	5.9579	6.7549	6.3564	0.563564	0.0886609
497252	6.1741	5.8645	6.0193	0.21892	0.0363697	4.624	4.6101	4.61705	0.00982878	0.0021288	4.7605	4.7819	4.7712	0.0151321	0.00317155	4.7713	4.0456	4.40845	0.513147	0.116401	5.0623	5.2364	5.14935	0.123107	0.0239073
497261	10.2155	12.6253	11.4204	1.70399	0.149205	5.4669	5.8725	5.6697	0.286803	0.0505851	5.6824	5.7081	5.69525	0.0181726	0.00319084	7.1275	6.9009	7.0142	0.16023	0.0228437	7.1106	9.3622	8.2364	1.59212	0.193303
497272	9.1244	9.3987	9.26155	0.193959	0.0209424	5.7519	5.6288	5.69035	0.0870448	0.0152969	6.0297	5.9486	5.98915	0.0573464	0.00957504	7.1792	7.2713	7.22525	0.0651245	0.00901346	6.5293	7.6464	7.08785	0.789909	0.111445
497276	9.1399	8.7975	8.9687	0.242113	0.0269954	5.5705	5.5059	5.5382	0.0456791	0.008248	4.9587	4.8518	4.90525	0.0755897	0.01541	5.3359	4.9909	5.1634	0.243952	0.0472464	7.0309	7.0248	7.02785	0.00431335	0.000613751
497302	6.9689	7.0394	7.00415	0.049851	0.00711736	5.2578	5.3274	5.2926	0.0492146	0.00929876	6.3038	5.7835	6.04365	0.367908	0.0608751	4.1413	4.0147	4.078	0.0895197	0.0219519	4.6033	4.6059	4.6046	0.00183848	0.00039927
519611	7.3221	6.1821	6.7521	0.806102	0.119385	6.2398	5.473	5.8564	0.542209	0.0925841	5.414	5.7264	5.5702	0.2209	0.0396575	5.1844	4.6373	4.91085	0.386858	0.0787762	5.0862	5.1929	5.13955	0.0754483	0.0146799
519622	7.7442	7.9158	7.83	0.12134	0.0154967	6.6993	6.5091	6.6042	0.134492	0.0203646	6.2355	6.1999	6.2177	0.025173	0.0040486	4.019	4.0821	4.05055	0.0446184	0.0110154	4.4421	4.6996	4.57085	0.18208	0.039835
575054	8.735	9.2216	8.9783	0.344078	0.0383233	4.8445	4.9809	4.9127	0.0964494	0.0196327	5.1934	5.0049	5.09915	0.13329	0.0261396	4.3748	4.4602	4.4175	0.0603869	0.0136699	8.5945	8.7307	8.6626	0.0963079	0.0111177	Average Smithsonian	top	right	left	front	back
mn1	7.1051	6.8907	6.9979	0.151604	0.0216642	6.628	6.9617	6.79485	0.235962	0.0347265	5.9237	6.7075	6.3156	0.55423	0.0877558	7.3801	6.9051	7.1426	0.335876	0.0470243	4.8547	4.841	4.84785	0.00968736	0.00199828	CV	0.0426679	0.0248017	0.0225993	0.0428374	0.0469076
mn2	7.4937	7.5024	7.49805	0.00615183	0.000820457	6.5234	6.5234	6.5234	0	0	6.6615	6.6645	6.663	0.00212132	0.000318373	7.2647	7.3762	7.32045	0.0788424	0.0107702	8.0068	8.5265	8.26665	0.367483	0.0444537	Average Field
mn3	6.6704	6.877	6.7737	0.146088	0.021567	8.2602	8.2811	8.27065	0.0147785	0.00178686	5.9375	6.2947	6.1161	0.252579	0.0412973	4.7899	4.4852	4.63755	0.215455	0.0464589	7.0684	7.2982	7.1833	0.162493	0.022621	CV	0.0158569	0.0252995	0.0162812	0.0324618	0.0401945
mn8	7.314	7.5972	7.4556	0.200253	0.0268594	5.778	6.0854	5.9317	0.217365	0.0366446	5.9628	5.9226	5.9427	0.0284257	0.0047833	5.6577	5.6277	5.6427	0.0212132	0.00375941	6.0996	6.1656	6.1326	0.046669	0.00760999
mn9	7.8764	7.8068	7.8416	0.0492146	0.0062761	5.3327	6.1266	5.72965	0.561372	0.0979767	7.5107	7.4251	7.4679	0.0605283	0.00810514	5.0201	5.0595	5.0398	0.02786	0.005528	6.1225	5.5773	5.8499	0.385515	0.0659011
mn10	5.0842	5.0637	5.07395	0.0144957	0.00285688	6.0209	5.7936	5.90725	0.160725	0.0272082	5.5439	5.5988	5.57135	0.0388202	0.00696782	4.8791	5.0804	4.97975	0.142341	0.0285839	4.6895	8.3787	6.5341	2.60866
mn14	5.2616	5.2908	5.2762	0.0206475	0.00391333	5.2499	5.2382	5.24405	0.00827315	0.00157763	5.1835	5.0796	5.13155	0.0734684	0.014317	4.7443	5.1563	4.9503	0.291328	0.0588506	6.0448	6.3137	6.17925	0.190141	0.0307709
mn15	6.5058	6.5884	6.5471	0.058407	0.00892105	5.673	5.9473	5.81015	0.193959	0.0333829	5.0617	5.2571	5.1594	0.138169	0.02678	4.8051	4.95	4.87755	0.10246	0.0210064	7.2515	8.1268	7.68915	0.618931	0.080494
mn16	5.4346	5.5231	5.47885	0.062579	0.0114219	4.0342	3.8929	3.96355	0.0999142	0.0252083	3.6729	3.7118	3.69235	0.0275065	0.00744958	3.9336	4.0007	3.96715	0.0474469	0.0119599	4.2323	4.2949	4.2636	0.0442649	0.010382
mn22	5.4895	5.8729	5.6812	0.271105	0.0477196	8.0121	8.4602	8.23615	0.316855	0.0384712	7.168	7.4405	7.30425	0.192687	0.0263801	7.2558	7.3771	7.31645	0.0857721	0.0117232	9.5121	9.2097	9.3609	0.213829	0.0228428
mn24	8.2412	8.0217	8.13145	0.15521	0.0190876	8.4884	8.6331	8.56075	0.102318	0.011952	7.6579	7.5631	7.6105	0.0670337	0.00880806	8.6629	7.7506	8.20675	0.645094	0.0786052	11.8599	10.2008	11.0303	1.17316	0.106358
mn2i	7.1612	6.9696	7.0654	0.135482	0.0191754	5.9533	5.9878	5.97055	0.0243952	0.00408592	5.941	6.2327	6.08685	0.206263	0.0338867	4.2162	4.7207	4.46845	0.356735	0.0798343	6.2671	6.7142	6.49065	0.316147	0.0487081
total			7.47793	0.282258	0.0367392			5.64358	0.142405	0.0249013			5.62333	0.129559	0.0225203			5.64643	0.230612	0.0408384			6.41303	0.355109	0.0455401
	T. Test: Pvalue		0.0088666	sig diff		T. Test: Pvalue		0.0313658	sig diff		T. Test: Pvalue		0.107081	no diff		T. Test: Pvalue		0.846248	no diff		T. Test: Pvalue		0.224824	no diff
	F. Test: Pvalue SD		0.281556	no diff		F. Test: Pvalue SD		0.000196017	sig diff		F. Test: Pvalue SD		0.0932181	no diff		F. Test: Pvalue SD		0.0604599	no diff		F. Test: Pvalue SD		0.0395271	sig diff
	F. Test: Pvalue CV		0.000556028	sig diff		F. Test: Pvalue CV		0.180076	no diff		F. Test: Pvalue CV		0.14881	no diff		F. Test: Pvalue CV		0.534485	no diff		F. Test: Pvalue CV		0.383868	no diff
			Top View					Right					Left					Front					Back
	T Test Value		2.85411					-2.42835					-1.72097					-0.197572					-1.27144
	F Test Value		1.82758					4.78038					2.05492					2.23729					2.4158
	CV Test Value		15.8748					1.79982					1.87468					1.11765					5.01265

[truncated: 17 more sheets: Number of Objects, Perimeter Divided Area, Hue, Saturation, Brightness, Symmetry, Euclidean Distance, Intensity Contrast, Red Contrast, Blue contrast, Green Contrast, Yellow Contrast, Centrality Ratio, Occupation Factor, Normalized Offset, Scute Radius, Scute Eccentricity]
