# Supplementary material for: New approaches for capturing and estimating variation in complex animal color patterns from digital photographs: application to the Eastern Box Turtle (Terrapene carolina)
Source: PeerJ journal article supplement (doi:10.7717/peerj.19690), 2025-07-21
Supplement: PeerJ_All_DataAnalysisFiles.zip [file PeerJ_Data_test_reflectance_FigureS1.xlsx]

## Sheet: PeerJ_Data_test_reflectance_Fig
	visible:R:Normalised_mean	visible:G:Normalised_mean	visible:B:Normalised_mean	Hue	Saturation	Value
1	26.1707	6.45009	5.80532	0.1051	0.7761	0.2586		CvHue_123	0.187313
2	47.5039	11.0345	9.79698	0.0766	0.7925	0.477		Cv_Sat123	0.0110369
3	29.849	6.73719	6.2314	0.1106	0.7892	0.294		Cv_Val123	0.341545
4	31.2419	6.6267	5.73069	0.0073	0.8151	0.3115		CvHue456	0.0732606
5	32.1212	6.74301	5.84292	0.0065	0.8172	0.3188		CvSat456	0.00575049
6	40.8027	8.3848	7.12329	0.0064	0.8241	0.4095		CvVal456	0.157516
7	42.5312	8.34531	6.89996	0.0076	0.8357	0.4024		CVHue789	0.170383
8	46.536	9.15588	7.53593	0.0106	0.8344	0.4271		CvSat789	0.00173796
9	58.7292	11.3258	9.30023	0.0101	0.8373	0.5451		CvVal789	0.166443
10	32.1965	7.83302	8.21313	0.5479	0.7672	0.33	Significantly darker area used to see how that impacts the calculations
11	28.9971	8.29941	7.64435	0.1496	0.7326	0.2882		CvHue111213	0.432406
12	21.9459	6.72671	6.485	0.2733	0.7142	0.2886		CvSat111213	0.17561
13	193.282	53.2009	42.6344	0.126	0.5242	0.898		CvVal111213	0.715933
cv	0.918691	1.08579	0.996527	1.39047	0.109298	0.42365
