# Supplementary material for: New approaches for capturing and estimating variation in complex animal color patterns from digital photographs: application to the Eastern Box Turtle (Terrapene carolina)
Source: PeerJ journal article supplement (doi:10.7717/peerj.19690), 2025-07-21
Supplement: PeerJ_All_DataAnalysisFiles.zip [file PeerJ_Data_VariationThreshold_Table4.xlsx]

## Sheet: Top
	Turtle ID	110%(0%)	115%(+5%)	sd	cv	130%(+20%)	sd	cv	105%(-5%)	sd	cv	90%(-10%)	sd	cv	0.2	0.05	0	-0.05	-0.2
1	17923	0.394	0.3898	0.00296985	0.00757808	0.34725	0.0330572	0.0891932	0.40825	0.0100763	0.02512	0.4408	0.0330926	0.0792827	0.881345	0.98934	1	1.03617	1.11878
2	20544	0.3602	0.34655	0.00965201	0.0273138	0.3025	0.0408001	0.123133	0.37775	0.0124097	0.033633	0.4165	0.0398101	0.102511	0.839811	0.962104	1	1.04872	1.1563
3	22468	0.3649	0.36065	0.0030052	0.00828393	0.33565	0.0206829	0.0590475	0.3737	0.00622254	0.0168496	0.39985	0.0247134	0.0646313	0.919841	0.988353	1	1.02412	1.09578
4	22609	0.3891	0.37665	0.00880348	0.0229931	0.3344	0.0386787	0.106921	0.3967	0.00537401	0.0136778	0.43195	0.0302995	0.0738068	0.859419	0.968003	1	1.01953	1.11013
5	22612	0.2839	0.23185	0.0368049	0.142724	0.18665	0.0687661	0.29228	0.29375	0.006965	0.024115	0.3985	0.0810344	0.237498	0.65745	0.816661	1	1.0347	1.40366
6	22613	0.2786	0.23295	0.0322794	0.126202	0.2003	0.0553665	0.231223	0.2799	0.000919239	0.00329181	0.3658	0.0616597	0.191371	0.718952	0.836145	1	1.00467	1.31299
7	22614	0.2979	0.28575	0.00859135	0.0294401	0.25345	0.0314309	0.114014	0.3198	0.0154856	0.0501397	0.39085	0.0657256	0.190855	0.850789	0.959215	1	1.07351	1.31202
8	27761	0.2919	0.2826	0.00657609	0.0228933	0.2225	0.0490732	0.190798	0.32995	0.0269054	0.0865335	0.45635	0.116284	0.310815	0.762247	0.96814	1	1.13035	1.56338
9	36684	0.3437	0.32415	0.0138239	0.0413983	0.2959	0.0337997	0.10569	0.35505	0.00802566	0.0229715	0.3823	0.0272943	0.075191	0.860925	0.943119	1	1.03302	1.11231
10	42824	0.3172	0.3133	0.00275772	0.00874771	0.2961	0.01492	0.0486547	0.3304	0.00933381	0.0288258	0.34685	0.0209657	0.063145	0.93348	0.987705	1	1.04161	1.09347
11	42825	0.3427	0.33455	0.00576292	0.0170186	0.31185	0.0218142	0.0666542	0.35125	0.00604576	0.0174242	0.38035	0.0266226	0.0736396	0.90998	0.976218	1	1.02495	1.10986
12	45769	0.38	0.3714	0.00608112	0.0161861	0.34885	0.0220264	0.0604415	0.3836	0.00254558	0.00666732	0.4014	0.0151321	0.0387307	0.918026	0.977368	1	1.00947	1.05632
13	45779	0.2314	0.2284	0.00212132	0.00922714	0.2141	0.0122329	0.0549178	0.2461	0.0103945	0.043537	0.2694	0.0268701	0.107309	0.925238	0.987035	1	1.06353	1.16422
14	49607	0.2318	0.22605	0.00406586	0.0177607	0.20955	0.0157331	0.0712955	0.241	0.00650538	0.0275185	0.27155	0.0281075	0.111682	0.904012	0.975194	1	1.03969	1.17148
15	52615	0.2984	0.29505	0.00236881	0.00798318	0.2796	0.0132936	0.0459986	0.3037	0.00374767	0.0124486	0.32615	0.0196222	0.0628363	0.936997	0.988773	1	1.01776	1.093
16	65908	0.2918	0.291	0.000565685	0.00194127	0.2662	0.0181019	0.0648815	0.30495	0.00929845	0.0311637	0.3568	0.0459619	0.141727	0.912269	0.997258	1	1.04507	1.22276
17	139661	0.3406	0.30175	0.0274711	0.0855331	0.23725	0.0730795	0.252936	0.36285	0.0157331	0.0447313	0.44625	0.0747058	0.189886	0.696565	0.885937	1	1.06533	1.31019
18	141485	0.2026	0.19815	0.00314663	0.0157037	0.16545	0.026269	0.142747	0.22555	0.0162281	0.0758057	0.3829	0.127491	0.435496	0.816634	0.978036	1	1.11328	1.88993
19	203066	0.267	0.2554	0.00820244	0.0314029	0.22645	0.0286732	0.116215	0.2794	0.00876812	0.0320942	0.3346	0.0478004	0.158911	0.848127	0.956554	1	1.04644	1.25318
20	203309	0.2216	0.21805	0.00251023	0.0114192	0.19945	0.0156624	0.0743969	0.23495	0.00943988	0.0413531	0.25555	0.0240063	0.100624	0.900045	0.98398	1	1.06024	1.1532
21	288185	0.4184	0.38885	0.020895	0.0517684	0.27265	0.103061	0.298273	0.4525	0.0241123	0.0553734	0.5861	0.118582	0.236101	0.651649	0.929374	1	1.0815	1.40081
22	288186	0.3243	0.3087	0.0110309	0.0348527	0.2893	0.0247487	0.0806673	0.3191	0.00367696	0.0114298	0.34035	0.0113491	0.0341505	0.892075	0.951896	1	0.983965	1.04949
23	288187	0.2349	0.2241	0.00763675	0.0332756	0.1848	0.035426	0.168816	0.25285	0.0126926	0.0520454	0.27995	0.0318552	0.123745	0.786718	0.954023	1	1.07642	1.19178
24	288189	0.2784	0.2742	0.00296985	0.0107486	0.2492	0.0206475	0.0782696	0.3095	0.021991	0.0748121	0.34495	0.047058	0.150984	0.895115	0.984914	1	1.11171	1.23904
25	288199	0.2188	0.2254	0.0046669	0.0210126	0.20565	0.00929845	0.0438141	0.23695	0.012834	0.0563203	0.2765	0.0408001	0.164749	0.939899	1.03016	1	1.08295	1.26371
26	288210	0.3161	0.3171	0.000707107	0.00223344	0.27085	0.0319966	0.109027	0.3519	0.0253144	0.0757917	0.3944	0.0553665	0.155852	0.856849	1.00316	1	1.11326	1.24771
27	324296	0.2968	0.29545	0.000954594	0.00322362	0.27565	0.0149553	0.0522502	0.3065	0.00685894	0.0227381	0.33045	0.0237941	0.0758681	0.92874	0.995451	1	1.03268	1.11338
28	326308	0.2634	0.26345	3.53553e-05	0.000134214	0.25525	0.00576292	0.0222228	0.27075	0.00519723	0.0194598	0.28995	0.0187737	0.0678546	0.969058	1.00019	1	1.0279	1.1008
29	497193	0.2697	0.26535	0.00307591	0.0114977	0.2412	0.0201525	0.0788904	0.29005	0.0143896	0.0514145	0.31345	0.0309359	0.106099	0.894327	0.983871	1	1.07545	1.16222
30	497202	0.3586	0.34855	0.00710642	0.0200988	0.3022	0.0398808	0.120705	0.3835	0.017607	0.0474517	0.4153	0.040093	0.103613	0.842722	0.971974	1	1.06944	1.15811
31	497203	0.1473	0.13865	0.00611647	0.04278	0.1285	0.0132936	0.0964003	0.15025	0.00208597	0.0140209	0.18645	0.0276832	0.165892	0.872369	0.941276	1	1.02003	1.26578
32	497237	0.2697	0.27235	0.00187383	0.00691387	0.20955	0.0425325	0.177496	0.3085	0.0274357	0.0949005	0.3916	0.0861963	0.260687	0.776974	1.00983	1	1.14386	1.45198
33	497243	0.2061	0.20355	0.00180312	0.00880323	0.19065	0.0109248	0.0550715	0.22255	0.0116319	0.0542723	0.25055	0.0314309	0.137659	0.925036	0.987627	1	1.07982	1.21567
34	497248	0.3666	0.352	0.0103238	0.028733	0.3353	0.0221324	0.0630644	0.3646	0.00141421	0.0038682	0.3783	0.00827315	0.0222128	0.914621	0.960175	1	0.994544	1.03191
35	497251	0.3199	0.30555	0.010147	0.032447	0.27635	0.0307945	0.103294	0.3193	0.000424264	0.00132748	0.3558	0.0253851	0.0751373	0.863864	0.955142	1	0.998124	1.11222
36	497252	0.2876	0.2739	0.00968736	0.0345053	0.26375	0.0168645	0.0611753	0.28555	0.00144957	0.00505825	0.30975	0.0156624	0.0524397	0.917072	0.952364	1	0.992872	1.07702
37	497261	0.1797	0.17995	0.000176777	0.000983048	0.17265	0.0049851	0.0282963	0.19115	0.00809637	0.0436639	0.20565	0.0183494	0.0952351	0.960768	1.00139	1	1.06372	1.14441
38	497272	0.2397	0.2337	0.00424264	0.0179241	0.22465	0.010642	0.0458359	0.2379	0.00127279	0.00532995	0.26075	0.0148846	0.0594849	0.937213	0.974969	1	0.992491	1.08782
39	497276	0.16	0.16335	0.00236881	0.0146517	0.15075	0.00654074	0.0420965	0.16335	0.00236881	0.0146517	0.1907	0.0217082	0.123799	0.942187	1.02094	1	1.02094	1.19187
40	497302	0.3799	0.369	0.00770746	0.0205834	0.3114	0.0484368	0.140133	0.40095	0.0148846	0.0381241	0.4481	0.0482247	0.116485	0.819689	0.971308	1	1.05541	1.17952
41	519611	0.1732	0.13835	0.0246427	0.158194	0.1047	0.0484368	0.348592	0.1659	0.00516188	0.0304446	0.2779	0.0740341	0.328238	0.604503	0.798788	1	0.957852	1.6045
42	519622	0.3102	0.29975	0.00738927	0.0242291	0.26635	0.0310066	0.107559	0.32895	0.0132583	0.0414871	0.3604	0.0354968	0.105866	0.85864	0.966312	1	1.06044	1.16183
43	575054	0.2675	0.2681	0.000424264	0.00158426	0.2581	0.0066468	0.0252923	0.27365	0.00434871	0.0160721	0.28655	0.0134704	0.0486252	0.96486	1.00224	1	1.02299	1.07121
44	mn1	0.3471	0.3427	0.00311127	0.00902079	0.3283	0.0132936	0.0393651	0.3514	0.00304056	0.00870597	0.3662	0.0135057	0.0378683	0.945837	0.987324	1	1.01239	1.05503
45	mn2	0.2152	0.21385	0.000954594	0.0044498	0.2082	0.00494975	0.023381	0.21745	0.00159099	0.00735463	0.22455	0.00661145	0.0300691	0.967472	0.993727	1	1.01046	1.04345
46	mn3	0.2893	0.28555	0.00265165	0.00922554	0.2817	0.00537401	0.0188232	0.28825	0.000742462	0.00257107	0.293	0.0026163	0.00898607	0.97373	0.987038	1	0.996371	1.01279
47	mn8	0.3029	0.30945	0.00463155	0.0151271	0.30785	0.00350018	0.0114619	0.31035	0.00526795	0.0171804	0.31205	0.00647003	0.0210424	1.01634	1.02162	1	1.0246	1.03021
48	mn9	0.2977	0.2891	0.00608112	0.0207264	0.28005	0.0124804	0.0432036	0.2983	0.000424264	0.0014237	0.3099	0.0086267	0.028396	0.940712	0.971112	1	1.00202	1.04098
49	mn10	0.323	0.321	0.00141421	0.00439197	0.31585	0.00505581	0.0158279	0.3249	0.0013435	0.00414725	0.32925	0.00441942	0.0135513	0.977864	0.993808	1	1.00588	1.01935
50	mn14	0.3418	0.3307	0.00784889	0.0233424	0.3133	0.0201525	0.0615251	0.34025	0.00109602	0.00321389	0.3563	0.010253	0.0293742	0.916618	0.967525	1	0.995465	1.04242
51	mn15	0.3459	0.3418	0.00289914	0.0084314	0.327	0.0133643	0.0397216	0.35325	0.00519723	0.0148673	0.3711	0.0178191	0.0497046	0.94536	0.988147	1	1.02125	1.07285
52	mn16	0.2886	0.27975	0.0062579	0.0220213	0.2711	0.0123744	0.0442179	0.2893	0.000494975	0.00171301	0.29945	0.00767211	0.0260934	0.939362	0.969335	1	1.00243	1.0376
53	mn22	0.2625	0.25855	0.00279307	0.0107209	0.24475	0.0125511	0.049487	0.2689	0.00452548	0.0170323	0.2867	0.017112	0.062316	0.932381	0.984952	1	1.02438	1.09219
54	mn24	0.2111	0.2115	0.000282843	0.00133858	0.20795	0.00222739	0.0106306	0.21405	0.00208597	0.00981284	0.21795	0.00484368	0.0225786	0.985078	1.00189	1	1.01397	1.03245
55	mn2i	0.2634	0.2603	0.00219203	0.00837132	0.2466	0.0118794	0.0465859	0.27255	0.00647003	0.0241441	0.29385	0.0215314	0.0772773	0.936219	0.988231	1	1.03474	1.1156
	AVG SD & CV			0.00681201	0.0249108		0.0245424	0.0920529		0.00838564	0.0287296		0.0345107	0.1096	0.88262	0.969586	1	1.03881	1.17856

## Sheet: left
Turtle ID	110%(0%)	115%(+5%)	sd	cv	130%(+20%)	sd	cv	105%(-5%)	sd	cv	90%(-10%)	sd	cv	0.2	0.05	0	-0.05	-0.2
17923	0.3703	0.34525	0.017713	0.0495088	0.20675	0.115647	0.400823	0.43845	0.0481893	0.11917	0.56445	0.137285	0.293736	0.558331	0.932352	1	1.18404	1.5243
20544	0.3902	0.37095	0.0136118	0.0357664	0.30625	0.0593616	0.170469	0.40935	0.0135411	0.0338718	0.48895	0.0698268	0.158851	0.784854	0.950666	1	1.04908	1.25308
22468	0.4598	0.43315	0.0188444	0.0422071	0.34795	0.0790899	0.195828	0.484	0.017112	0.0362619	0.5336	0.0521845	0.105062	0.756742	0.94204	1	1.05263	1.1605
22609	0.4059	0.38265	0.0164402	0.0416974	0.30105	0.0741401	0.209747	0.42415	0.0129047	0.0310938	0.4785	0.051336	0.116092	0.741685	0.94272	1	1.04496	1.17886
22612	0.3814	0.3684	0.00919239	0.0245196	0.284	0.0688722	0.20701	0.41845	0.0261983	0.065508	0.5094	0.0905097	0.20321	0.744625	0.965915	1	1.09714	1.33561
22613	0.2106	0.20895	0.00116673	0.0055618	0.17655	0.024077	0.124381	0.22305	0.00880348	0.0406018	0.2937	0.0587606	0.233038	0.838319	0.992165	1	1.05912	1.39459
22614	0.3264	0.30225	0.0170766	0.0543279	0.2542	0.0510531	0.175863	0.34345	0.0120562	0.0359966	0.4221	0.0676701	0.180815	0.778799	0.926011	1	1.05224	1.2932
27761	0.3455	0.3206	0.017607	0.0528658	0.2216	0.0876105	0.308977	0.3739	0.0200818	0.0558294	0.4561	0.078206	0.195125	0.641389	0.927931	1	1.0822	1.32012
36684	0.3367	0.317	0.01393	0.0426189	0.2542	0.0583363	0.197449	0.3497	0.00919239	0.0267843	0.39865	0.0438053	0.119141	0.754975	0.941491	1	1.03861	1.18399
42824	0.369	0.35505	0.00986414	0.0272471	0.32185	0.0333401	0.096519	0.3781	0.00643467	0.0172257	0.4163	0.0334462	0.0851806	0.872222	0.962195	1	1.02466	1.12818
42825	0.3083	0.28735	0.0148139	0.0497402	0.2413	0.0473762	0.172402	0.33035	0.0155917	0.0488271	0.411	0.0726199	0.201918	0.782679	0.932047	1	1.07152	1.33312
45769	0.3637	0.34915	0.0102884	0.0288656	0.2961	0.0478004	0.144894	0.38155	0.0126219	0.0338728	0.4276	0.0451841	0.114202	0.814133	0.959995	1	1.04908	1.17569
45779	0.3052	0.2583	0.0331633	0.117705	0.17155	0.0945048	0.396454	0.3378	0.0230517	0.0717004	0.47575	0.120597	0.308847	0.56209	0.84633	1	1.10682	1.55881
49607	0.2798	0.26595	0.00979343	0.0358898	0.212	0.0479418	0.194965	0.31285	0.0233699	0.0788657	0.39515	0.0815648	0.241691	0.757684	0.9505	1	1.11812	1.41226
52615	0.3218	0.31005	0.0083085	0.026299	0.2738	0.0339411	0.113973	0.33405	0.00866206	0.0264148	0.37145	0.0351079	0.101285	0.850839	0.963487	1	1.03807	1.15429
65908	0.362	0.3467	0.0108187	0.0305312	0.27315	0.0628264	0.197832	0.4008	0.0274357	0.0719343	0.4908	0.0910754	0.213591	0.754558	0.957735	1	1.10718	1.3558
139661	0.3907	0.3117	0.0558614	0.159059	0.16985	0.156165	0.557183	0.44465	0.0381484	0.0913352	0.58255	0.135658	0.278774	0.434733	0.797799	1	1.13809	1.49104
141485	0.2897	0.2734	0.0115258	0.0409371	0.19	0.0704985	0.293928	0.33125	0.0293803	0.0946301	0.45865	0.119466	0.319278	0.655851	0.943735	1	1.14342	1.58319
203066	0.329	0.2793	0.0351432	0.115546	0.17535	0.108647	0.43084	0.3922	0.0446891	0.12393	0.56765	0.168751	0.376403	0.532979	0.848936	1	1.1921	1.72538
203309	0.2546	0.24535	0.00654074	0.0261656	0.21815	0.025774	0.109039	0.27815	0.0166524	0.0625147	0.33425	0.0563211	0.191292	0.856834	0.963668	1	1.0925	1.31284
288185	0.3022	0.2465	0.0393858	0.143561	0.1195	0.129188	0.612703	0.3853	0.0587606	0.17094	0.58	0.196434	0.445328	0.395433	0.815685	1	1.27498	1.91926
288186	0.3444	0.3224	0.0155563	0.0466597	0.24415	0.0708875	0.240888	0.37845	0.024077	0.0666168	0.4497	0.0744583	0.187529	0.708914	0.936121	1	1.09887	1.30575
288187	0.2695	0.2503	0.0135765	0.0522372	0.2061	0.0448306	0.188522	0.28835	0.013329	0.0477869	0.3617	0.0651952	0.206576	0.76475	0.928757	1	1.06994	1.34212
288189	0.2842	0.25835	0.0182787	0.0673807	0.19215	0.0650892	0.273283	0.321	0.0260215	0.0859932	0.42415	0.0989596	0.279409	0.676108	0.909043	1	1.12949	1.49243
288199	0.294	0.27335	0.0146018	0.0514735	0.23305	0.0430982	0.163545	0.30005	0.004278	0.0144028	0.3667	0.0514067	0.155613	0.792687	0.929762	1	1.02058	1.24728
288210	0.395	0.3672	0.0196576	0.0515811	0.28095	0.0806455	0.238614	0.4137	0.0132229	0.0327016	0.48795	0.0657256	0.148877	0.711266	0.92962	1	1.04734	1.23532
324296	0.3435	0.31275	0.0217435	0.066266	0.25405	0.0632507	0.2117	0.36225	0.0132583	0.0375721	0.4554	0.0791252	0.198085	0.739592	0.91048	1	1.05459	1.32576
326308	0.2993	0.29725	0.00144957	0.00485984	0.27985	0.0137532	0.0474945	0.3057	0.00452548	0.0149603	0.33485	0.0251376	0.0792798	0.935015	0.993151	1	1.02138	1.11878
497193	0.2761	0.2709	0.00367696	0.0134441	0.2393	0.0260215	0.100976	0.2919	0.0111723	0.039339	0.32915	0.037512	0.123955	0.866715	0.981166	1	1.05723	1.19214
497202	0.3801	0.35605	0.0170059	0.0462023	0.3043	0.0535987	0.15663	0.40585	0.018208	0.0463337	0.4626	0.0583363	0.138451	0.800579	0.936727	1	1.06775	1.21705
497203	0.1777	0.1761	0.00113137	0.00639554	0.1491	0.0202233	0.123765	0.2111	0.0236174	0.121489	0.27495	0.0687661	0.303838	0.839055	0.990996	1	1.18796	1.54727
497237	0.2667	0.25865	0.00569221	0.0216702	0.20925	0.0406233	0.170704	0.29625	0.020895	0.074234	0.3881	0.0858428	0.262195	0.784589	0.969816	1	1.1108	1.45519
497243	0.2867	0.2758	0.00770746	0.0274043	0.2462	0.0286378	0.107479	0.29185	0.0036416	0.0125887	0.3276	0.0289207	0.0941581	0.858737	0.961981	1	1.01796	1.14266
497248	0.287	0.27735	0.00682358	0.0241821	0.2588	0.0199404	0.0730686	0.2917	0.0033234	0.0114858	0.31115	0.0170766	0.0570981	0.901742	0.966376	1	1.01638	1.08415
497251	0.359	0.34415	0.0105005	0.0298671	0.27705	0.0579474	0.18221	0.3902	0.0220617	0.0588941	0.4531	0.0665387	0.163868	0.771727	0.958635	1	1.08691	1.26212
497252	0.2983	0.2852	0.0092631	0.0317501	0.2509	0.0335169	0.122057	0.31935	0.0148846	0.0481975	0.40105	0.0726552	0.207779	0.8411	0.956084	1	1.07057	1.34445
497261	0.2881	0.27155	0.0117026	0.0418212	0.21385	0.0525027	0.209195	0.3044	0.0115258	0.0389058	0.38695	0.0698975	0.207088	0.742277	0.942555	1	1.05658	1.34311
497272	0.2868	0.2811	0.00403051	0.0141944	0.2512	0.025173	0.0935799	0.3019	0.0106773	0.0362742	0.34165	0.0387848	0.12343	0.875872	0.980126	1	1.05265	1.19125
497276	0.2467	0.23795	0.00618718	0.0255326	0.2266	0.0142128	0.0600585	0.2556	0.00629325	0.0250577	0.2727	0.0183848	0.0707924	0.918525	0.964532	1	1.03608	1.10539
497302	0.4005	0.37865	0.0154503	0.0396593	0.25365	0.103839	0.317477	0.438	0.0265165	0.0632475	0.51625	0.0818476	0.17856	0.633333	0.945443	1	1.09363	1.28901
519611	0.2266	0.1809	0.0323148	0.1586	0.1456	0.0572756	0.307768	0.22715	0.000388909	0.0017142	0.34895	0.0865145	0.300632	0.642542	0.798323	1	1.00243	1.53994
519622	0.2867	0.2613	0.0179605	0.0655493	0.23575	0.0360271	0.137916	0.30305	0.0115612	0.0392071	0.36855	0.0578767	0.176655	0.822288	0.911406	1	1.05703	1.28549
575054	0.3121	0.2974	0.0103945	0.0341082	0.2761	0.0254558	0.0865551	0.3261	0.00989949	0.0310232	0.3497	0.0265872	0.0803482	0.884652	0.9529	1	1.04486	1.12047
mn1	0.3935	0.3957	0.00155563	0.00394231	0.3957	0.00155563	0.00394231	0.3957	0.00155563	0.00394231	0.3957	0.00155563	0.00394231	1.00559	1.00559	1	1.00559	1.00559
mn2	0.2217	0.2189	0.0019799	0.00898729	0.2102	0.00813173	0.0376556	0.2245	0.0019799	0.00887449	0.2337	0.00848528	0.0372652	0.948128	0.98737	1	1.01263	1.05413
mn3	0.262	0.2597	0.00162635	0.00623479	0.22955	0.0229456	0.0933602	0.28155	0.0138239	0.0508654	0.31025	0.0341179	0.119241	0.876145	0.991221	1	1.07462	1.18416
mn8	0.3593	0.35445	0.00342947	0.00960972	0.35315	0.00434871	0.0122078	0.35595	0.00236881	0.00662372	0.3575	0.00127279	0.00355132	0.982883	0.986502	1	0.990676	0.99499
mn9	0.2986	0.29255	0.004278	0.0144735	0.2712	0.0193747	0.0680054	0.30615	0.00533866	0.0176557	0.32605	0.0194101	0.0621471	0.908238	0.979739	1	1.02528	1.09193
mn10	0.3181	0.3185	0.000282843	0.000888604	0.3183	0.000141421	0.000444442	0.3191	0.000707107	0.00221942	0.3196	0.00106066	0.00332652	1.00063	1.00126	1	1.00314	1.00472
mn14	0.3514	0.35025	0.000813173	0.00231789	0.34225	0.00647003	0.018655	0.35545	0.00286378	0.00810294	0.3649	0.00954594	0.0266535	0.973961	0.996727	1	1.01153	1.03842
mn15	0.4128	0.41055	0.00159099	0.00386468	0.4003	0.00883883	0.0217411	0.41715	0.00307591	0.00741229	0.4273	0.010253	0.0244091	0.969719	0.994549	1	1.01054	1.03513
mn16	0.3719	0.36255	0.00661145	0.0180038	0.34535	0.0187737	0.0523491	0.3782	0.00445477	0.0118778	0.40145	0.020895	0.0540376	0.92861	0.974859	1	1.01694	1.07946
mn22	0.3162	0.3108	0.00381838	0.0121798	0.30205	0.0100056	0.0323674	0.317	0.000565685	0.00178675	0.32575	0.00675287	0.0210386	0.95525	0.982922	1	1.00253	1.0302
mn24	0.231	0.2313	0.000212132	0.000917725	0.2245	0.00459619	0.0201809	0.23705	0.004278	0.0182801	0.24635	0.0108541	0.0454764	0.971861	1.0013	1	1.02619	1.06645
mn2i	0.3269	0.3231	0.00268701	0.00826771	0.309	0.0126572	0.0398088	0.33265	0.00406586	0.0123292	0.3467	0.0140007	0.0415698	0.945243	0.988376	1	1.01759	1.06057
			0.0120851	0.0392936		0.0467378	0.169554		0.0147515	0.0442782		0.0585375	0.157632	0.797238	0.947415	1	1.06572	1.26595

## Sheet: right
Turtle ID	110%(0%)	115%(+5%)	sd	cv	130%(+20%)	sd	cv	105%(-5%)	sd	cv	90%(-10%)	sd	cv	0.2	0.05	0	-0.05	-0.2
17923	0.3239	0.3006	0.0164756	0.0527641	0.20155	0.0865145	0.329297	0.3875	0.044972	0.126432	0.51235	0.133254	0.318695	0.62226	0.928064	1	1.19636	1.58182
20544	0.3951	0.3883	0.00480833	0.0122755	0.3135	0.0576999	0.162856	0.427	0.0225567	0.0548758	0.49555	0.0710289	0.159499	0.79347	0.982789	1	1.08074	1.25424
22468	0.4556	0.42415	0.0222385	0.0505564	0.3281	0.0901561	0.230078	0.47815	0.0159453	0.0341532	0.5327	0.0545179	0.110327	0.720149	0.93097	1	1.0495	1.16923
22609	0.401	0.37815	0.0161574	0.0414744	0.3022	0.0698621	0.198698	0.42575	0.0175009	0.0423366	0.4932	0.0651952	0.145818	0.753616	0.943017	1	1.06172	1.22993
22612	0.3146	0.2961	0.0130815	0.0428409	0.2418	0.0514774	0.185037	0.33775	0.0163695	0.0501863	0.43555	0.0855246	0.22802	0.768595	0.941195	1	1.07359	1.38446
22613	0.2773	0.2543	0.0162635	0.0611868	0.21155	0.0464923	0.190211	0.2953	0.0127279	0.0444566	0.3619	0.0598212	0.187175	0.762892	0.917057	1	1.06491	1.30508
22614	0.2863	0.26505	0.015026	0.0545063	0.216	0.0497096	0.197928	0.3064	0.0142128	0.0479597	0.3737	0.0618011	0.187276	0.754453	0.925777	1	1.07021	1.30527
27761	0.3607	0.34015	0.014531	0.0414669	0.2633	0.0688722	0.220744	0.3864	0.0181726	0.0486485	0.45705	0.0681297	0.166627	0.72997	0.943027	1	1.07125	1.26712
36684	0.3566	0.3398	0.0118794	0.0341166	0.29345	0.0446538	0.137386	0.37635	0.0139654	0.0381073	0.43045	0.0522198	0.132698	0.822911	0.952888	1	1.05538	1.20709
42824	0.3697	0.3658	0.00275772	0.00749889	0.3319	0.0267286	0.0761934	0.3848	0.0106773	0.028303	0.4109	0.0291328	0.0746421	0.897755	0.989451	1	1.04084	1.11144
42825	0.2967	0.27425	0.0158745	0.0556075	0.23525	0.0434517	0.163368	0.3058	0.00643467	0.0213599	0.41195	0.0814941	0.229998	0.792888	0.924334	1	1.03067	1.38844
45769	0.4042	0.39755	0.00470226	0.01173	0.3611	0.0304763	0.0796454	0.41005	0.00413657	0.0101605	0.43735	0.0234406	0.0557081	0.89337	0.983548	1	1.01447	1.08201
45779	0.3327	0.3023	0.021496	0.0677041	0.2121	0.0852771	0.313058	0.37815	0.032138	0.0904213	0.5028	0.120279	0.287921	0.637511	0.908626	1	1.13661	1.51127
49607	0.2774	0.26205	0.0108541	0.0402413	0.2054	0.0509117	0.210902	0.30415	0.0189151	0.0650507	0.3936	0.0821658	0.244906	0.740447	0.944665	1	1.09643	1.41889
52615	0.335	0.31745	0.0124097	0.0380404	0.2709	0.0453255	0.149614	0.3559	0.0147785	0.0427805	0.39995	0.0459266	0.124979	0.808657	0.947612	1	1.06239	1.19388
65908	0.3649	0.35605	0.0062579	0.0173601	0.29875	0.0467751	0.140963	0.3932	0.0200111	0.0527928	0.4728	0.0762968	0.182158	0.818717	0.975747	1	1.07756	1.2957
139661	0.4613	0.4052	0.0396687	0.0915607	0.24345	0.154043	0.437157	0.4969	0.025173	0.0525423	0.5914	0.0919946	0.174778	0.527748	0.878387	1	1.07717	1.28203
141485	0.3011	0.27645	0.0174302	0.060359	0.19845	0.0725845	0.2906	0.34455	0.0307238	0.0951717	0.4894	0.133148	0.336871	0.659083	0.918134	1	1.1443	1.62537
203066	0.335	0.28505	0.03532	0.113926	0.1954	0.0987121	0.372218	0.39245	0.0406233	0.111687	0.54165	0.146124	0.333368	0.583284	0.850896	1	1.17149	1.61687
203309	0.2431	0.22695	0.0114198	0.0485896	0.2032	0.0282136	0.126433	0.2509	0.00551543	0.0223297	0.29695	0.0380777	0.141015	0.83587	0.933566	1	1.03209	1.22151
288185	0.374	0.28745	0.0612001	0.185048	0.1589	0.152099	0.570834	0.42135	0.0334815	0.0841931	0.5591	0.130885	0.280539	0.424866	0.768583	1	1.1266	1.49492
288186	0.3652	0.3212	0.0311127	0.0906547	0.26455	0.0711703	0.226027	0.36815	0.00208597	0.00568887	0.444	0.05572	0.137716	0.724398	0.879518	1	1.00808	1.21577
288187	0.3011	0.2514	0.0351432	0.127215	0.2134	0.0620133	0.241062	0.2953	0.00410122	0.0137533	0.3372	0.0255266	0.0799829	0.708735	0.834939	1	0.980737	1.11989
288189	0.3169	0.29515	0.0153796	0.0502559	0.22875	0.0623315	0.228467	0.34845	0.0223092	0.0670601	0.43095	0.0806455	0.215673	0.721837	0.931366	1	1.09956	1.35989
288199	0.2683	0.25655	0.0083085	0.0316605	0.2169	0.0363453	0.149816	0.2844	0.0113844	0.0411957	0.35525	0.0614829	0.197203	0.808423	0.956206	1	1.06001	1.32408
288210	0.3944	0.34415	0.0355321	0.0962213	0.24695	0.104263	0.325136	0.41905	0.0174302	0.042855	0.4959	0.0717713	0.16123	0.626141	0.872591	1	1.0625	1.25735
324296	0.3786	0.3312	0.0335169	0.0944403	0.27575	0.0727259	0.222285	0.4056	0.0190919	0.0486914	0.47425	0.0676348	0.158609	0.728341	0.874802	1	1.07132	1.25264
326308	0.3163	0.30855	0.00548008	0.0175405	0.2872	0.0205768	0.0681916	0.3191	0.0019799	0.00623198	0.34005	0.0167938	0.0511733	0.907999	0.975498	1	1.00885	1.07509
497193	0.3167	0.29425	0.0158745	0.0519668	0.25945	0.0404819	0.140525	0.3353	0.0131522	0.0403441	0.37315	0.0399162	0.115724	0.81923	0.929113	1	1.05873	1.17824
497202	0.3369	0.31835	0.0131168	0.0400361	0.27725	0.0421789	0.137357	0.34875	0.00837922	0.0244417	0.4295	0.0654781	0.170872	0.822944	0.944939	1	1.03517	1.27486
497203	0.2339	0.20095	0.0232992	0.10716	0.1705	0.0448306	0.221714	0.23435	0.000318198	0.00135909	0.3268	0.0656902	0.234315	0.728944	0.859128	1	1.00192	1.39718
497237	0.2763	0.23975	0.0258448	0.100164	0.20435	0.0508763	0.211698	0.29545	0.0135411	0.0473672	0.3666	0.0638517	0.198637	0.739595	0.867716	1	1.06931	1.32682
497243	0.2885	0.29265	0.00293449	0.0100989	0.26225	0.0185616	0.0674046	0.30655	0.0127633	0.0428982	0.33885	0.0356028	0.113502	0.909012	1.01438	1	1.06256	1.17452
497248	0.2736	0.2562	0.0123037	0.0464464	0.24155	0.0226628	0.0879851	0.2755	0.0013435	0.00489347	0.30355	0.0211778	0.0733877	0.882858	0.936404	1	1.00694	1.10947
497251	0.3393	0.32375	0.0109955	0.0331665	0.2595	0.0564271	0.188467	0.37315	0.0239356	0.0671923	0.45	0.0782767	0.198345	0.76481	0.95417	1	1.09976	1.32626
497252	0.2853	0.2735	0.00834386	0.0298635	0.238	0.0334462	0.127828	0.303	0.0125158	0.042549	0.3694	0.0594677	0.181664	0.83421	0.95864	1	1.06204	1.29478
497261	0.2719	0.2496	0.0157685	0.0604736	0.19535	0.054129	0.231692	0.317	0.0318905	0.108305	0.3848	0.0798324	0.243132	0.718463	0.917985	1	1.16587	1.41523
497272	0.3057	0.2876	0.0127986	0.0431439	0.2546	0.0361332	0.128978	0.31295	0.00512652	0.0165733	0.35485	0.0347543	0.105228	0.832843	0.940792	1	1.02372	1.16078
497276	0.2577	0.2384	0.0136472	0.0550178	0.21825	0.0278954	0.11722	0.25315	0.00321734	0.012596	0.28225	0.0173595	0.0643003	0.846915	0.925107	1	0.982344	1.09527
497302	0.3778	0.34205	0.0252791	0.0702343	0.2445	0.0942573	0.302932	0.42605	0.0341179	0.0848862	0.5284	0.10649	0.235026	0.647168	0.905373	1	1.12771	1.39862
519611	0.2339	0.2167	0.0121622	0.0539824	0.16585	0.0481186	0.240744	0.2606	0.0188798	0.076359	0.345	0.0785596	0.27141	0.709064	0.926464	1	1.11415	1.47499
519622	0.2745	0.25855	0.0112784	0.0423163	0.2323	0.0298399	0.117758	0.28895	0.0102177	0.0362683	0.3604	0.0607405	0.191339	0.846266	0.941894	1	1.05264	1.31293
575054	0.3102	0.3044	0.00410122	0.013346	0.28685	0.0165109	0.0553084	0.3174	0.00509117	0.0162242	0.3402	0.0212132	0.0652313	0.924726	0.981302	1	1.02321	1.09671
mn1	0.2965	0.2961	0.000282843	0.000954582	0.2961	0.000282843	0.000954582	0.2961	0.000282843	0.000954582	0.2961	0.000282843	0.000954582	0.998651	0.998651	1	0.998651	0.998651
mn2	0.2501	0.2471	0.00212132	0.00853307	0.2471	0.00212132	0.00853307	0.2471	0.00212132	0.00853307	0.2471	0.00212132	0.00853307	0.988005	0.988005	1	0.988005	0.988005
mn3	0.2016	0.2001	0.00106066	0.00528086	0.1865	0.0106773	0.0550235	0.2092	0.00537401	0.0261636	0.23565	0.024077	0.110129	0.925099	0.99256	1	1.0377	1.1689
mn8	0.3792	0.37535	0.00272236	0.00721585	0.37535	0.00272236	0.00721585	0.37535	0.00272236	0.00721585	0.37535	0.00272236	0.00721585	0.989847	0.989847	1	0.989847	0.989847
mn9	0.3359	0.3165	0.0137179	0.0420536	0.2879	0.0339411	0.108821	0.33985	0.00279307	0.00826658	0.37375	0.026764	0.0754287	0.8571	0.942245	1	1.01176	1.11268
mn10	0.2776	0.28195	0.00307591	0.0109942	0.28065	0.00215668	0.00772656	0.28235	0.00335876	0.0119966	0.2834	0.00410122	0.0146211	1.01099	1.01567	1	1.01711	1.02089
mn14	0.3523	0.3475	0.00339411	0.00970024	0.33855	0.00972272	0.0281471	0.353	0.000494975	0.00140359	0.36165	0.00661145	0.0185208	0.960971	0.986375	1	1.00199	1.02654
mn15	0.4091	0.40655	0.00180312	0.00442131	0.3949	0.0100409	0.0249774	0.4151	0.00424264	0.0102952	0.42745	0.0129754	0.0310212	0.96529	0.993767	1	1.01467	1.04485
mn16	0.3827	0.3765	0.00438406	0.0115492	0.3517	0.0219203	0.0596958	0.3922	0.00671751	0.0173378	0.41185	0.0206122	0.0518839	0.918997	0.983799	1	1.02482	1.07617
mn22	0.3025	0.3012	0.000919239	0.00304535	0.29335	0.00647003	0.021717	0.3062	0.0026163	0.00859634	0.31355	0.00781353	0.0253665	0.969752	0.995702	1	1.01223	1.03653
mn24	0.2344	0.23075	0.00258094	0.0110972	0.22435	0.00710642	0.0309817	0.23475	0.000247487	0.00105505	0.2429	0.00601041	0.025185	0.957125	0.984428	1	1.00149	1.03626
mn2i	0.3108	0.3072	0.00254558	0.00823814	0.29125	0.0138239	0.0459229	0.3186	0.00551543	0.017526	0.34135	0.0216021	0.0662489	0.937098	0.988417	1	1.0251	1.09829
			0.0141942	0.0457699		0.046669	0.164028		0.0132435	0.0387459		0.0544389	0.145488	0.801461	0.939566	1	1.05518	1.23974

## Sheet: front
Turtle ID	110%(0%)	115%(+5%)	sd	cv	130%(+20%)	sd	cv	105%(-5%)	sd	cv	90%(-10%)	sd	cv	0.2	0.05	0	-0.05	-0.2
17923	0.3489	0.28735	0.0435224	0.136809	0.1983	0.10649	0.389219	0.364	0.0106773	0.0299546	0.47475	0.0889894	0.216085	0.568358	0.823588	1	1.04328	1.36071
20544	0.2955	0.27625	0.0136118	0.0476145	0.22305	0.0512299	0.197589	0.3213	0.0182434	0.0591548	0.476	0.127633	0.330869	0.754822	0.934856	1	1.08731	1.61083
22468	0.3591	0.3428	0.0115258	0.0328418	0.2974	0.0436285	0.132912	0.3749	0.0111723	0.0304422	0.41235	0.0376534	0.0976173	0.828182	0.954609	1	1.044	1.14829
22609	0.3053	0.289	0.0115258	0.038788	0.23425	0.0502399	0.186229	0.3337	0.0200818	0.0628539	0.4063	0.0714178	0.200725	0.767278	0.94661	1	1.09302	1.33082
22612	0.179	0.19335	0.010147	0.0545024	0.16425	0.0104298	0.060771	0.2147	0.0252437	0.128238	0.23645	0.0406233	0.195563	0.917598	1.08017	1	1.19944	1.32095
22613	0.2065	0.20635	0.000106066	0.000513824	0.19705	0.00668216	0.0331169	0.21515	0.00611647	0.0290121	0.2421	0.025173	0.112229	0.954237	0.999274	1	1.04189	1.1724
22614	0.2326	0.22405	0.00604576	0.0264788	0.15965	0.0515834	0.263013	0.25265	0.0141775	0.0584338	0.347	0.080893	0.279134	0.686371	0.963242	1	1.0862	1.49183
27761	0.2707	0.2558	0.0105359	0.0400224	0.20875	0.0438053	0.182731	0.30575	0.0247841	0.0859887	0.38645	0.0818476	0.249099	0.771149	0.944958	1	1.12948	1.4276
36684	0.3154	0.3046	0.00763675	0.0246347	0.2773	0.0269408	0.0909086	0.32335	0.0056215	0.0176016	0.35045	0.0247841	0.0744435	0.879201	0.965758	1	1.02521	1.11113
42824	0.2282	0.21775	0.00738927	0.0331394	0.19735	0.0218142	0.102523	0.23415	0.00420729	0.0181996	0.25655	0.0200465	0.0827085	0.864812	0.954207	1	1.02607	1.12423
42825	0.3119	0.27425	0.0266226	0.0908388	0.26115	0.0358857	0.125244	0.3215	0.00678823	0.0214342	0.3684	0.0399515	0.117453	0.837288	0.879288	1	1.03078	1.18115
45769	0.3095	0.39755	0.0622608	0.176114	0.316	0.00459619	0.0146961	0.379	0.0491439	0.142756	0.40755	0.0693318	0.193381	1.021	1.28449	1	1.22456	1.3168
45779	0.3597	0.22785	0.093232	0.317359	0.1652	0.137532	0.524032	0.2766	0.0587606	0.184695	0.40865	0.0346129	0.0900966	0.459272	0.633445	1	0.768974	1.13609
49607	0.2344	0.22555	0.0062579	0.0272112	0.20755	0.0189858	0.0859184	0.2518	0.0123037	0.0506115	0.3258	0.0646296	0.230737	0.885452	0.962244	1	1.07423	1.38993
52615	0.2387	0.25145	0.00901561	0.0367872	0.215	0.0167584	0.0738745	0.28185	0.0305117	0.117229	0.3312	0.0654074	0.22954	0.900712	1.05341	1	1.18077	1.38752
65908	0.2608	0.2652	0.00311127	0.0118299	0.22745	0.023582	0.0965981	0.2991	0.0270822	0.0967394	0.3658	0.0742462	0.236981	0.872124	1.01687	1	1.14686	1.40261
139661	0.2727	0.25105	0.0153089	0.0584587	0.187	0.0605991	0.263646	0.3191	0.0328098	0.110881	0.4221	0.105642	0.304093	0.685735	0.920609	1	1.17015	1.54785
141485	0.2892	0.21525	0.0522905	0.207317	0.16475	0.0879994	0.387705	0.25375	0.0250669	0.0923361	0.3968	0.0760847	0.221821	0.569675	0.744295	1	0.87742	1.37206
203066	0.2541	0.2513	0.0019799	0.00783498	0.2287	0.0179605	0.0744015	0.2645	0.00735391	0.0283606	0.29235	0.0270468	0.0989911	0.900039	0.988981	1	1.04093	1.15053
203309	0.2309	0.22245	0.00597505	0.0263596	0.20875	0.0156624	0.0712495	0.2364	0.00388909	0.0166449	0.27685	0.0324916	0.127982	0.904071	0.963404	1	1.02382	1.199
288185	0.2755	0.234	0.0293449	0.115191	0.18755	0.06219	0.26861	0.31735	0.0295924	0.099831	0.47685	0.142376	0.378483	0.680762	0.849365	1	1.15191	1.73085
288186	0.3264	0.30025	0.0184908	0.0590149	0.24395	0.058301	0.204439	0.32995	0.00251023	0.00764906	0.38775	0.043381	0.12149	0.747396	0.919884	1	1.01088	1.18796
288187	0.2268	0.2081	0.0132229	0.0608089	0.2002	0.018809	0.0880985	0.2171	0.00685894	0.0309031	0.2496	0.016122	0.0676828	0.882716	0.917549	1	0.957231	1.10053
288189	0.3118	0.2789	0.0232638	0.0787669	0.23	0.0578413	0.213515	0.3146	0.0019799	0.00632152	0.38325	0.0505228	0.145379	0.737652	0.894484	1	1.00898	1.22915
288199	0.2168	0.20475	0.00852064	0.0404253	0.16665	0.0354614	0.18496	0.22935	0.00887419	0.0397812	0.3505	0.0945402	0.333299	0.768681	0.944419	1	1.05789	1.6167
288210	0.2993	0.2749	0.0172534	0.0600955	0.1951	0.0736805	0.29806	0.32215	0.0161574	0.051999	0.3905	0.0644881	0.186976	0.651854	0.918476	1	1.07634	1.30471
324296	0.2177	0.209	0.00615183	0.0288344	0.18655	0.0220264	0.108974	0.2305	0.00905097	0.0403881	0.27385	0.039704	0.161546	0.856913	0.960037	1	1.0588	1.25792
326308	0.2767	0.26565	0.00781353	0.0288136	0.24685	0.0211071	0.0806308	0.28355	0.00484368	0.0172911	0.30745	0.0217435	0.074445	0.892121	0.960065	1	1.02476	1.11113
497193	0.2713	0.2586	0.00898026	0.0338942	0.22765	0.0308652	0.123721	0.30695	0.0252084	0.0871884	0.3564	0.0601748	0.191731	0.839108	0.953188	1	1.1314	1.31367
497202	0.3744	0.3593	0.0106773	0.0291054	0.31755	0.040199	0.116191	0.3778	0.00240416	0.00639235	0.41235	0.0268347	0.0682166	0.848157	0.959669	1	1.00908	1.10136
497203	0.2084	0.1711	0.0263751	0.138999	0.1495	0.0416486	0.232739	0.20365	0.00335876	0.0163027	0.28745	0.0558968	0.225458	0.71737	0.821017	1	0.977207	1.37932
497237	0.2458	0.2275	0.0129401	0.0546801	0.20335	0.0300167	0.13366	0.2469	0.000777817	0.00315737	0.3216	0.0535987	0.188927	0.827299	0.925549	1	1.00448	1.30838
497243	0.1803	0.17475	0.00392444	0.0221064	0.15605	0.0171473	0.101961	0.1917	0.00806102	0.0433388	0.22395	0.0308652	0.152704	0.865502	0.969218	1	1.06323	1.2421
497248	0.3066	0.30245	0.00293449	0.0096363	0.28675	0.0140361	0.0473113	0.31005	0.00243952	0.00791217	0.3268	0.0142836	0.0451012	0.935258	0.986464	1	1.01125	1.06588
497251	0.3271	0.3148	0.00869741	0.027099	0.2914	0.0252437	0.0816288	0.33455	0.00526795	0.0159237	0.37785	0.0358857	0.101811	0.890859	0.962397	1	1.02278	1.15515
497252	0.2579	0.2456	0.00869741	0.0345478	0.2156	0.0299106	0.126338	0.2654	0.0053033	0.0202687	0.2893	0.0222032	0.0811519	0.835983	0.952307	1	1.02908	1.12175
497261	0.1901	0.16875	0.0150967	0.0841395	0.13695	0.0375827	0.229829	0.18315	0.00491439	0.026333	0.24605	0.0395626	0.181418	0.72041	0.887691	1	0.96344	1.29432
497272	0.2061	0.20115	0.00350018	0.0171893	0.19075	0.0108541	0.0547012	0.216	0.00700036	0.0331692	0.24155	0.0250669	0.111993	0.925522	0.975983	1	1.04803	1.172
497276	0.1863	0.16745	0.013329	0.0753581	0.1504	0.0253851	0.150788	0.1967	0.00735391	0.0384016	0.2447	0.041295	0.191624	0.8073	0.898819	1	1.05582	1.31347
497302	0.3358	0.3009	0.024678	0.0775185	0.2172	0.0838629	0.303301	0.36915	0.023582	0.0669041	0.4679	0.0934088	0.232447	0.646814	0.896069	1	1.09932	1.39339
519611	0.1958	0.19545	0.000247487	0.00126511	0.1217	0.0523966	0.330057	0.2342	0.0271529	0.126293	0.3226	0.0896611	0.345915	0.621553	0.998212	1	1.19612	1.6476
519622	0.3017	0.28705	0.0103591	0.0351902	0.2597	0.0296985	0.105802	0.319	0.0122329	0.0394166	0.356	0.0383959	0.116758	0.860789	0.951442	1	1.05734	1.17998
575054	0.2696	0.26415	0.00385373	0.0144402	0.23145	0.0269761	0.107678	0.27785	0.00583363	0.021312	0.3087	0.0276479	0.0956178	0.858494	0.979785	1	1.0306	1.14503
mn1	0.1256	0.1286	0.00212132	0.0166902	0.1286	0.00212132	0.0166902	0.1286	0.00212132	0.0166902	0.1286	0.00212132	0.0166902	1.02389	1.02389	1	1.02389	1.02389
mn2	0.2242	0.2242	0	0	0.221	0.00226274	0.0101651	0.22685	0.00187383	0.00830876	0.23115	0.00491439	0.0215851	0.985727	1	1	1.01182	1.031
mn3	0.325	0.3264	0.000989949	0.00303945	0.31415	0.00767211	0.0240072	0.3342	0.00650538	0.0197372	0.34785	0.0161574	0.0480267	0.966615	1.00431	1	1.02831	1.07031
mn8	0.3012	0.30875	0.00533866	0.0175052	0.30875	0.00533866	0.0175052	0.30875	0.00533866	0.0175052	0.30875	0.00533866	0.0175052	1.02507	1.02507	1	1.02507	1.02507
mn9	0.3252	0.31725	0.0056215	0.0175002	0.30175	0.0165817	0.0528963	0.33225	0.0049851	0.015165	0.35625	0.0219557	0.0644381	0.927891	0.975554	1	1.02168	1.09548
mn10	0.1516	0.1524	0.000565685	0.00372161	0.1524	0.000565685	0.00372161	0.1524	0.000565685	0.00372161	0.1524	0.000565685	0.00372161	1.00528	1.00528	1	1.00528	1.00528
mn14	0.3255	0.3241	0.000989949	0.00304787	0.32155	0.00279307	0.00863325	0.32625	0.00053033	0.0016274	0.3305	0.00353553	0.0107791	0.987865	0.995699	1	1.0023	1.01536
mn15	0.3962	0.3909	0.00374767	0.00952272	0.38355	0.0089449	0.022943	0.3956	0.000424264	0.00107164	0.40375	0.00533866	0.0133475	0.968072	0.986623	1	0.998486	1.01906
mn16	0.3283	0.31955	0.00618718	0.0191007	0.30715	0.0149553	0.04707	0.3336	0.00374767	0.011324	0.3449	0.011738	0.0348722	0.935577	0.973348	1	1.01614	1.05056
mn22	0.204	0.20015	0.00272236	0.013472	0.19075	0.00936916	0.0474689	0.2068	0.0019799	0.00963924	0.2174	0.00947523	0.0449702	0.935049	0.981127	1	1.01373	1.06569
mn24	0.2435	0.2471	0.00254558	0.0103774	0.24335	0.000106066	0.000435724	0.24985	0.00449013	0.0182026	0.2549	0.00806102	0.0323476	0.999384	1.01478	1	1.02608	1.04682
mn2i	0.3123	0.29785	0.0102177	0.0334924	0.282	0.0214253	0.0721028	0.3074	0.00346482	0.0111823	0.32475	0.00880348	0.0276383	0.902978	0.95373	1	0.98431	1.03987
AVG SD & CV			0.0130455	0.0485463		0.0321779	0.134055		0.0118331	0.0429494		0.043894	0.142284	0.83835	0.953378	1	1.04577	1.23715

## Sheet: back
Turtle ID	110%(0%)	115%(+5%)	sd	cv	130%(+20%)	sd	cv	105%(-5%)	sd	cv	90%(-10%)	sd	cv	0.2	0.05	0	-0.05	-0.2
17923	0.4036	0.3641	0.0279307	0.0727647	0.18295	0.156023	0.532003	0.4399	0.025668	0.0608606	0.55075	0.104051	0.218056	0.453295	0.902131	1	1.08994	1.36459
20544	0.3286	0.3281	0.000353553	0.00107676	0.26645	0.0439467	0.147708	0.3654	0.0260215	0.07499	0.4436	0.0813173	0.210612	0.810864	0.998478	1	1.11199	1.34997
22468	0.299	0.29705	0.00137886	0.00462665	0.2678	0.0220617	0.0778466	0.31835	0.0136825	0.0443266	0.3817	0.0584777	0.171816	0.895652	0.993478	1	1.06472	1.27659
22609	0.3799	0.33595	0.0310773	0.0868264	0.2141	0.117238	0.394742	0.42025	0.0285318	0.071316	0.5608	0.127916	0.271958	0.563569	0.884312	1	1.10621	1.47618
22612	0.294	0.25755	0.025774	0.0934604	0.2167	0.0546594	0.214057	0.30295	0.00632861	0.0212031	0.361	0.0473762	0.14466	0.737075	0.87602	1	1.03044	1.22789
22613	0.3957	0.3541	0.0294156	0.0784626	0.28355	0.079302	0.233499	0.4095	0.00975807	0.0242376	0.46195	0.0468458	0.109242	0.716578	0.89487	1	1.03487	1.16742
22614	0.3691	0.34785	0.015026	0.0419165	0.1914	0.125653	0.44836	0.42915	0.0424618	0.106387	0.52395	0.109495	0.245217	0.518559	0.942428	1	1.16269	1.41953
27761	0.2978	0.25545	0.029946	0.108255	0.20155	0.068059	0.27259	0.3083	0.00742462	0.0244997	0.38795	0.0637457	0.185915	0.676797	0.85779	1	1.03526	1.30272
36684	0.3005	0.2885	0.00848528	0.0288125	0.25255	0.0339058	0.122614	0.31765	0.0121269	0.039236	0.3786	0.055225	0.162642	0.840433	0.960067	1	1.05707	1.2599
42824	0.3309	0.30595	0.0176423	0.0554049	0.20785	0.0870095	0.323005	0.3764	0.0321734	0.0909751	0.442	0.0785596	0.203285	0.628135	0.9246	1	1.1375	1.33575
42825	0.3244	0.29435	0.0212486	0.0686822	0.23255	0.0649478	0.233227	0.344	0.0138593	0.0414701	0.39185	0.0476944	0.133178	0.716862	0.907367	1	1.06042	1.20792
45769	0.3333	0.32755	0.00406586	0.012305	0.3017	0.0223446	0.0703766	0.35215	0.013329	0.0388911	0.3763	0.0304056	0.0856978	0.905191	0.982748	1	1.05656	1.12901
45779	0.3224	0.3047	0.0125158	0.0399164	0.25515	0.0475529	0.164671	0.35395	0.0223092	0.0659695	0.4299	0.076014	0.202084	0.791408	0.945099	1	1.09786	1.33344
49607	0.343	0.32	0.0162635	0.0490602	0.2673	0.053528	0.175415	0.34955	0.00463155	0.0133754	0.41895	0.0537048	0.140967	0.7793	0.932945	1	1.0191	1.22143
52615	0.3044	0.29415	0.00724784	0.024218	0.25675	0.0336936	0.120088	0.32565	0.015026	0.0476979	0.3942	0.0634982	0.181787	0.843463	0.966327	1	1.06981	1.29501
65908	0.2887	0.25525	0.0236527	0.0869665	0.18635	0.0723724	0.304694	0.32225	0.0237234	0.0776608	0.48405	0.138133	0.357511	0.64548	0.884136	1	1.11621	1.67665
139661	0.2689	0.22055	0.0341886	0.139702	0.1216	0.104157	0.533454	0.33805	0.0488964	0.161122	0.54865	0.197813	0.483917	0.452213	0.820193	1	1.25716	2.04035
141485	0.288	0.2564	0.0223446	0.0820888	0.1792	0.0769332	0.329337	0.3112	0.0164049	0.0547559	0.50385	0.152629	0.3855	0.622222	0.890278	1	1.08056	1.74948
203066	0.2665	0.25405	0.00880348	0.0338238	0.21635	0.0354614	0.146884	0.27585	0.00661145	0.0243807	0.36875	0.0723017	0.227632	0.81182	0.953283	1	1.03508	1.38368
203309	0.2926	0.2705	0.0156271	0.0555037	0.2375	0.0389616	0.146997	0.31315	0.014531	0.047977	0.35625	0.0450073	0.13873	0.811688	0.92447	1	1.07023	1.21753
288185	0.2775	0.1798	0.0690843	0.30214	0.06245	0.152063	0.894622	0.34385	0.0469165	0.151015	0.59225	0.222562	0.511784	0.225045	0.647928	1	1.2391	2.13423
288186	0.37	0.358	0.00848528	0.0233112	0.31405	0.0395626	0.115672	0.3931	0.0163342	0.04281	0.43845	0.0484015	0.119739	0.848784	0.967568	1	1.06243	1.185
288187	0.2304	0.2053	0.0177484	0.0814706	0.18925	0.0290974	0.138675	0.2327	0.00162635	0.00702373	0.2578	0.0193747	0.0793721	0.821398	0.891059	1	1.00998	1.11892
288189	0.3496	0.30985	0.0281075	0.0852453	0.2293	0.0850649	0.293885	0.36485	0.0107834	0.0301865	0.4361	0.0611647	0.155695	0.655892	0.886299	1	1.04362	1.24743
288199	0.3531	0.29745	0.0393505	0.120976	0.1991	0.108894	0.394402	0.357	0.00275772	0.00776712	0.45575	0.0725845	0.179476	0.563863	0.842396	1	1.01105	1.29071
288210	0.4071	0.3531	0.0381838	0.100457	0.24495	0.114657	0.351683	0.44885	0.0295217	0.06898	0.5655	0.112006	0.230322	0.601695	0.867354	1	1.10255	1.38909
324296	0.2605	0.2541	0.00452548	0.0175884	0.2263	0.0241831	0.0993552	0.27365	0.00929845	0.0348159	0.3479	0.0618011	0.20316	0.868714	0.975432	1	1.05048	1.33551
326308	0.2944	0.29445	3.53553e-05	0.000120083	0.28385	0.00745998	0.0258019	0.3052	0.00763675	0.0254728	0.3195	0.0177484	0.0578217	0.964164	1.00017	1	1.03668	1.08526
497193	0.3217	0.29755	0.0170766	0.0551526	0.2516	0.0495682	0.172922	0.3347	0.00919239	0.0280085	0.3946	0.0515481	0.143929	0.782095	0.92493	1	1.04041	1.22661
497202	0.3933	0.37725	0.0113491	0.029457	0.32595	0.0476236	0.132426	0.4084	0.0106773	0.0266367	0.4552	0.0437699	0.10317	0.828757	0.959191	1	1.03839	1.15739
497203	0.2197	0.21915	0.000388909	0.0017724	0.1919	0.0196576	0.0955178	0.21915	0.000388909	0.0017724	0.2559	0.0255973	0.107642	0.873464	0.997497	1	0.997497	1.16477
497237	0.2878	0.2837	0.00289914	0.0101457	0.2382	0.0350725	0.133355	0.3291	0.0292035	0.0946783	0.38145	0.0662206	0.197895	0.827658	0.985754	1	1.1435	1.3254
497243	0.2286	0.23055	0.00137886	0.00600613	0.1873	0.0292035	0.140435	0.2681	0.0279307	0.112465	0.30585	0.054624	0.204412	0.819335	1.00853	1	1.17279	1.33793
497248	0.3304	0.324	0.00452548	0.0138309	0.2991	0.0221324	0.0703175	0.34315	0.00901561	0.0267704	0.3737	0.0306177	0.0869698	0.905266	0.98063	1	1.03859	1.13105
497251	0.4278	0.41335	0.0102177	0.0242946	0.33255	0.0673519	0.17716	0.46345	0.0252084	0.0565685	0.5404	0.0796202	0.164471	0.777349	0.966223	1	1.08333	1.26321
497252	0.3447	0.3214	0.0164756	0.0494688	0.2696	0.0531037	0.172892	0.3595	0.0104652	0.0297222	0.4172	0.0512652	0.134572	0.782129	0.932405	1	1.04294	1.21033
497261	0.2792	0.2906	0.00806102	0.0282942	0.26785	0.00802566	0.0293416	0.31155	0.0228749	0.0774436	0.3334	0.0383252	0.125123	0.959348	1.04083	1	1.11587	1.19413
497272	0.3038	0.28235	0.0151674	0.0517528	0.2451	0.0415072	0.151238	0.3233	0.0137886	0.0439757	0.36635	0.0442295	0.131999	0.806781	0.929394	1	1.06419	1.20589
497276	0.208	0.20745	0.000388909	0.00187223	0.18975	0.0129047	0.0648885	0.23185	0.0168645	0.0766829	0.2618	0.0380423	0.161951	0.91226	0.997356	1	1.11466	1.25865
497302	0.3629	0.35085	0.00852064	0.0238757	0.2553	0.0760847	0.246149	0.4209	0.0410122	0.10465	0.5533	0.134633	0.293895	0.7035	0.966795	1	1.15982	1.52466
519611	0.2859	0.2719	0.00989949	0.0354948	0.17695	0.0770393	0.332891	0.30595	0.0141775	0.0479091	0.44425	0.11197	0.306705	0.618923	0.951032	1	1.07013	1.55386
519622	0.2894	0.29355	0.00293449	0.0100677	0.2261	0.0447599	0.173656	0.3281	0.027365	0.0886317	0.41145	0.0863024	0.246279	0.781272	1.01434	1	1.13372	1.42173
575054	0.2965	0.2917	0.00339411	0.0115407	0.2756	0.0147785	0.0516642	0.30095	0.00314663	0.0105335	0.32445	0.0197636	0.0636561	0.929511	0.983811	1	1.01501	1.09427
mn1	0.4039	0.40605	0.00152028	0.00375401	0.37955	0.0172181	0.0439544	0.42215	0.0129047	0.0312444	0.4523	0.034224	0.0799439	0.939713	1.00532	1	1.04518	1.11983
mn2	0.2643	0.25435	0.00703571	0.0271309	0.2407	0.0166877	0.06609	0.2643	0	0	0.27865	0.010147	0.0373772	0.910708	0.962353	1	1	1.05429
mn3	0.2737	0.27355	0.000106066	0.000387633	0.25665	0.0120562	0.045465	0.28235	0.00611647	0.0219997	0.29955	0.0182787	0.0637722	0.937706	0.999452	1	1.0316	1.09445
mn8	0.2994	0.2956	0.00268701	0.00903195	0.28215	0.0121976	0.0419486	0.3074	0.00565685	0.0186449	0.32185	0.0158745	0.0511052	0.942385	0.987308	1	1.02672	1.07498
mn9	0.2327	0.23265	3.53553e-05	0.000151952	0.2169	0.0111723	0.0496988	0.245	0.00869741	0.0364137	0.27645	0.0309359	0.12152	0.932101	0.999785	1	1.05286	1.18801
mn10	0.2736	0.24875	0.0175716	0.067279	0.24705	0.0187737	0.0721163	0.24915	0.0172888	0.0661454	0.2496	0.0169706	0.0648722	0.902961	0.909174	1	0.910636	0.912281
mn14	0.3703	0.36575	0.00321734	0.00874217	0.3527	0.0124451	0.0344262	0.3737	0.00240416	0.0064628	0.3849	0.0103238	0.0273405	0.952471	0.987713	1	1.00918	1.03943
mn15	0.3495	0.34395	0.00392444	0.0113186	0.3297	0.0140007	0.0412271	0.35585	0.00449013	0.0127316	0.37055	0.0148846	0.0413432	0.943348	0.98412	1	1.01817	1.06023
mn16	0.3269	0.33085	0.00279307	0.00849281	0.3204	0.00459619	0.0142011	0.33455	0.00540937	0.0163561	0.3431	0.0114551	0.0341944	0.980116	1.01208	1	1.0234	1.04956
mn22	0.279	0.27825	0.00053033	0.00190338	0.26955	0.00668216	0.024363	0.28505	0.004278	0.0151689	0.29455	0.0109955	0.0383419	0.966129	0.997312	1	1.02168	1.05573
mn24	0.2204	0.2208	0.000282843	0.00128215	0.21505	0.00378302	0.0173752	0.2258	0.00381838	0.0171151	0.23415	0.00972272	0.0427795	0.975726	1.00181	1	1.0245	1.06239
mn2i	0.3352	0.33535	0.000106066	0.000316355	0.3107	0.0173241	0.0536433	0.3466	0.00806102	0.0236463	0.3628	0.0195161	0.0559202	0.926909	1.00045	1	1.03401	1.08234
AVG SD & CV			0.0129272	0.0434182		0.0480826	0.181		0.0154329	0.0471233		0.0608311	0.162345	0.788874	0.945542	1	1.06688	1.27427

## Sheet: Table
Thresholds	130%(+20%)	115%(+5%)	110%(0%)	105%(-5%)	90%(-20%)	130%(+20%) % change	115%(+5%) % change	110%(0%) % change	105%(-5%) % change	90%(-20%) % change
Top (% change)	0.88262	0.969586	1	1.03881	1.17856	-0.11738	-0.0304139		0.0388085	0.178558	These rows for percent change.
cv	0.0920529	0.0249108		0.0287296	0.1096	0.0245424	0.00681201		0.00838564	0.0345107	These rows for sd.
Left (% change)	0.797238	0.947415	1	1.06572	1.26595	-0.202762	-0.0525852		0.0657233	0.265945
cv	0.169554	0.0392936		0.0442782	0.157632	0.0467378	0.0120851		0.0147515	0.0585375
Right(% change)	0.801461	0.939566	1	1.05518	1.23974	-0.198539	-0.060434		0.0551781	0.239738
cv	0.164028	0.0457699		0.0387459	0.145488	0.046669	0.0141942		0.0132435	0.0544389
Front(% change)	0.83835	0.953378	1	1.04577	1.23715	-0.16165	-0.0466218		0.0457714	0.237146
cv	0.134055	0.0485463		0.0429494	0.142284	0.0321779	0		0.0118331	0.043894
Back(% change	0.788874	0.945542	1	1.06688	1.27427	-0.211126	-0.0544576		0.0668798	0.274266
cv	0.181	0.0434182		0.0471233	0.162345	0.0480826	0.0129272		0.0154329	0.0608311
