# Supplementary material for: New approaches for capturing and estimating variation in complex animal color patterns from digital photographs: application to the Eastern Box Turtle (Terrapene carolina)
Source: PeerJ journal article supplement (doi:10.7717/peerj.19690), 2025-07-21
Supplement: PeerJ_All_DataAnalysisFiles.zip [file PeerJ_Data_Within_Individual_Variation_Figure8.xlsx]

## Sheet: top view
Top SC ECC	Top SC ECC					Top frac area						Top ECC						Top AVG OBJ						Top Peak LEn						Top no. obj.						Top perim div area						Top hue						Top saturatn
image 1	image 2	image 1 Norm	image 2 Norm	diff		image 1	image 2	image 1 Norm	image 2 Norm	diff		image 1	image 2	image 1 Norm	image 2 Norm	diff		image 1	image 2	image 1 Norm	image 2 Norm	diff		image 1	image 2	image 1 Norm	image 2 Norm	diff		image 1	image 2	image 1 Norm	image 2 Norm	diff		image 1	image 2	image 1 Norm	image 2 Norm	diff		image 1	image 2	image 1 Norm	image 2 Norm	diff		image 1	image 2
0.6985	0.6949	1.00258	0.997416	0.00516722		0.394	0.408	0.982544	1.01746	0.0349127		0.8408	0.8456	1.07221	1.07833	0.00612109		216.45	211.429	4.46296	8.74266	4.2797		7.3926	8.2178	0.947138	1.05286	0.105724		1	1	1	1	0		0.545	0.5329	1.01123	0.988774	0.0224511		0.0708	0.0688	1.01433	0.985673	0.0286533		0.4492	0.4793
0.6432	0.689	0.965621	1.03438	0.0687584		0.3602	0.3666	0.991194	1.00881	0.0176114		0.8366	0.8241	1.06686	1.05092	0.0159403		40.9766	38.6538	0.844893	1.59835	0.753454		6.5051	6.2449	1.02041	0.979592	0.0408157		16	14	1.06667	0.933333	0.133333		0.8244	0.8419	0.989498	1.0105	0.0210046		0.0703	0.0688	1.01078	0.989216	0.0215672		0.3712	0.3781
0.7347	0.7512	0.988896	1.0111	0.0222088		0.3649	0.3735	0.988353	1.01165	0.0232936		0.9248	0.9233	1.17933	1.17742	0.00191284		105.695	108.762	2.17932	4.49734	2.31802		8.4945	8.7234	0.986706	1.01329	0.0265886		12	11	1.04348	0.956522	0.0869565		0.4633	0.4744	0.988163	1.01184	0.0236749		0.0844	0.0795	1.0299	0.970104	0.0597926		0.5632	0.5586
0.3394	0.3468	0.989216	1.01078	0.0215681		0.3891	0.3921	0.99616	1.00384	0.00768049		0.7797	0.773	0.994295	0.985751	0.00854403		34.5598	37.7657	0.712586	1.56162	0.849038		6.4444	6.3101	1.01053	0.98947	0.0210592		21	22	0.976744	1.02326	0.0465116		0.756	0.7756	0.987203	1.0128	0.0255941		0.0731	0.0708	1.01598	0.984017	0.0319666		0.7023	0.6903
0.6364	0.5222	1.09857	0.901433	0.197134		0.2839	0.2519	1.05972	0.940276	0.119448		0.8243	0.7567	1.05117	0.964965	0.0862054		25.5456	22.7147	0.526723	0.93926	0.412538		6.0079	5.8385	1.0143	0.9857	0.0285994		11	14	0.88	1.12	0.24		1.0623	0.9796	1.0405	0.959499	0.081003		0.0747	0.0711	1.02469	0.975309	0.0493827		0.3988	0.4079
0.569	0.5994	0.973982	1.02602	0.052037		0.2786	0.2812	0.995355	1.00464	0.00928903		0.7806	0.8415	0.995443	1.0731	0.0776614		34.9319	26.8232	0.720258	1.10915	0.38889		6.2371	6.6784	0.965832	1.03417	0.0683365		9	8	1.05882	0.941176	0.117647		0.9389	0.8936	1.02472	0.97528	0.0494407		0.0918	0.0836	1.04675	0.95325	0.0935006		0.3585	0.3595
0.5891	0.5437	1.04008	0.959922	0.0801554		0.2979	0.3046	0.98888	1.01112	0.0222407		0.8333	0.8138	1.06265	1.03778	0.0248669		39.809	44.9753	0.820819	1.85974	1.03892		7.3584	7.3959	0.997458	1.00254	0.00508326		10	11	0.952381	1.04762	0.0952381		0.7391	0.7348	1.00292	0.997083	0.00583486		0.0603	0.0592	1.00921	0.990795	0.01841		0.689	0.6794
0.7257	0.6897	1.02543	0.974565	0.050869		0.2919	0.3204	0.953454	1.04655	0.0930916		0.8409	0.8485	1.07234	1.08203	0.00969173		25.6104	18.8284	0.528059	0.778561	0.250502		5.4094	6.8688	0.881139	1.11886	0.237722		18	14	1.125	0.875	0.25		1.095	0.8965	1.09967	0.900326	0.199347		0.0858	0.0839	1.0112	0.988804	0.0223925		0.3563	0.3847
0.6184	0.6158	1.00211	0.997893	0.00421326		0.3437	0.3395	1.00615	0.993852	0.0122951		0.566	0.5586	0.721779	0.712342	0.00943669		68.6904	60.7348	1.41632	2.5114	1.09508		7.8163	9.0465	0.927047	1.07295	0.145907		5	5	1	1	0		0.6734	0.6307	1.03274	0.967257	0.0654858		0.0778	0.0776	1.00129	0.998713	0.002574		0.4683	0.4659
0.8377	0.7995	1.02333	0.976667	0.046665		0.3172	0.3094	1.01245	0.987552	0.0248963		0.7666	0.7666	0.97759	0.97759	0		55.5264	46.1806	1.14489	1.90958	0.764689		7.2879	7.5871	0.979886	1.02011	0.0402286		7	7	1	1	0		0.7504	0.6958	1.03775	0.962246	0.0755082		0.0641	0.0625	1.01264	0.987362	0.0252765		0.5336	0.5481
0.1625	0.182	0.943396	1.0566	0.113208		0.3427	0.342	1.00102	0.998978	0.00204469		0.7945	0.7913	1.01317	1.00909	0.00408073		67.6139	68.1042	1.39413	2.81613	1.42201		10.202	9.7516	1.02257	0.977428	0.0451447		8	8	1	1	0		0.512	0.5174	0.994754	1.00525	0.0104915		0.0912	0.0941	0.98435	1.01565	0.0313006		0.7141	0.7065
0.6246	0.6288	0.996649	1.00335	0.00670177		0.38	0.3748	1.00689	0.993111	0.0137785		0.7579	0.758	0.966495	0.966623	0.000127523		80.3095	80.321	1.6559	3.3213	1.6654		9.0245	9.1125	0.995148	1.00485	0.00970392		6	6	1	1	0		0.5609	0.5613	0.999644	1.00036	0.000712885		0.0961	0.096	1.00052	0.999479	0.00104112		0.7143	0.7145
0.6719	0.6286	1.03329	0.966705	0.0665898		0.2314	0.2459	0.969621	1.03038	0.0607584		0.7506	0.7658	0.957186	0.976569	0.0193835		37.398	37.8384	0.771106	1.56463	0.793524		7.9554	8.8077	0.949156	1.05084	0.101688		6	6	1	1	0		0.752	0.7285	1.01587	0.984127	0.031746		0.0849	0.0748	1.06324	0.936756	0.126487		0.391	0.4125
0.608	0.5903	1.01477	0.985229	0.0295419		0.2318	0.2337	0.995918	1.00408	0.00816327		0.719	0.7171	0.916889	0.914466	0.00242293		47.1074	43.1929	0.971304	1.78604	0.814737		10.1045	10.0857	1.00093	0.999069	0.00186229		6	6	1	1	0		0.6066	0.5924	1.01184	0.988157	0.0236864		0.0924	0.0915	1.00489	0.995106	0.00978793		0.696	0.6975
0.5597	0.5468	1.01166	0.988342	0.0233168		0.2984	0.2994	0.998327	1.00167	0.0033456		0.755	0.772	0.962797	0.984476	0.0216789		28.9797	30.9873	0.59753	1.28134	0.683805		7.7685	7.5748	1.01262	0.987376	0.0252488		16	16	1	1	0		0.7278	0.7406	0.991283	1.00872	0.0174339		0.0883	0.0892	0.99493	1.00507	0.0101408		0.6997	0.6934
0.5	0.4687	1.03231	0.967689	0.0646227		0.2918	0.3012	0.984148	1.01585	0.0317032		0.76	0.7605	0.969173	0.969811	0.000637614		20.9705	21.0064	0.432389	0.868622	0.436233		6.5515	6.5716	0.998468	1.00153	0.0030633		6	4	1.2	0.8	0.4		0.9146	0.9217	0.996134	1.00387	0.00773294		0.0693	0.0726	0.976744	1.02326	0.0465116		0.5283	0.52
0.7192	0.7281	0.993851	1.00615	0.0122988		0.3406	0.3494	0.987246	1.01275	0.0255072		0.6551	0.6539	0.835402	0.833871	0.00153027		51.5813	39.1405	1.06355	1.61847	0.554922		6.6186	7.2261	0.95612	1.04388	0.0877592		5	4	1.11111	0.888889	0.222222		0.8478	0.8129	1.02102	0.978985	0.0420305		0.0625	0.0647	0.982704	1.0173	0.0345912		0.4871	0.4897
0.6793	0.6089	1.05465	0.94535	0.1093		0.2026	0.1937	1.02246	0.977542	0.0449155		0.6894	0.826	0.879142	1.05334	0.174196		15.012	18.9536	0.309531	0.783738	0.474206		8.1938	7.7198	1.02979	0.970214	0.0595717		5	7	0.833333	1.16667	0.333333		0.9007	0.935	0.981315	1.01868	0.0373699		0.0682	0.0675	1.00516	0.994842	0.0103169		0.466	0.47
0.6641	0.7291	0.953345	1.04666	0.0933104		0.267	0.2637	1.00622	0.993782	0.0124364		0.8457	0.8406	1.07846	1.07196	0.00650366		24.1405	27.3812	0.497751	1.13222	0.634471		6.6923	6.4211	1.02068	0.979319	0.0413623		10	10	1	1	0		0.8887	0.9241	0.980472	1.01953	0.0390556		0.0909	0.0881	1.01564	0.984358	0.0312849		0.4599	0.4664
0.6732	0.5521	1.09883	0.901167	0.197666		0.2216	0.2145	1.01628	0.983719	0.0325613		0.7925	0.8328	1.01062	1.06201	0.0513917		51.9534	39.0103	1.07122	1.61309	0.541866		9.2612	9.4219	0.991399	1.0086	0.0172027		8	6	1.14286	0.857143	0.285714		0.7473	0.6664	1.05723	0.942774	0.114451		0.0837	0.0854	0.989947	1.01005	0.0201064		0.3896	0.4168
0.7927	0.7184	1.04917	0.950831	0.098339		0.4184	0.3948	1.02902	0.970979	0.0580423		0.7868	0.8402	1.00335	1.07145	0.0680972		66.8436	44.7932	1.37824	1.85221	0.473971		4.9629	5.2602	0.970919	1.02908	0.0581624		10	8	1.11111	0.888889	0.222222		0.8675	0.7928	1.04499	0.955008	0.0899837		0.0548	0.0533	1.01388	0.986124	0.0277521		0.499	0.5098
0.737	0.6865	1.03548	0.964524	0.0709519		0.3243	0.3139	1.0163	0.983704	0.0325917		0.8803	0.8781	1.12258	1.11978	0.0028055		75.5807	59.0444	1.55839	2.44151	0.883113		8.1952	8.3544	0.99038	1.00962	0.0192391		8	7	1.06667	0.933333	0.133333		0.6197	0.5879	1.02633	0.973667	0.0526664		0.0635	0.068	0.965779	1.03422	0.0684411		0.3632	0.39
0.6927	0.7253	0.97701	1.02299	0.0459803		0.2349	0.2133	1.04819	0.951807	0.0963855		0.7745	0.73	0.987664	0.930916	0.0567476		17.3585	17.05	0.357914	0.705023	0.34711		7.0181	6.3244	1.05199	0.948008	0.103984		9	6	1.2	0.8	0.4		0.9786	1.0742	0.953429	1.04657	0.0931411		0.0913	0.136	0.803344	1.19666	0.393313		0.3351	0.3189
0.7114	0.6859	1.01825	0.981751	0.036499		0.2784	0.3038	0.956372	1.04363	0.0872552		0.6705	0.7138	0.85504	0.910258	0.0552174		43.8178	36.482	0.903476	1.50854	0.605067		7.3316	8.0141	0.955525	1.04447	0.08895		10	8	1.11111	0.888889	0.222222		0.7256	0.7372	0.99207	1.00793	0.01586		0.0924	0.0775	1.0877	0.912301	0.175397		0.3767	0.3921
0.5066	0.5223	0.984741	1.01526	0.030518		0.2188	0.232	0.970719	1.02928	0.0585626		0.7915	0.8019	1.00934	1.02261	0.0132624		25.244	31.4458	0.520504	1.30029	0.77979		8.5938	8.633	0.997724	1.00228	0.00455105		14	15	0.965517	1.03448	0.0689655		0.8	0.8841	0.950062	1.04994	0.0998753		0.0953	0.0819	1.07562	0.924379	0.151242		0.3997	0.4113
0.4418	0.6352	0.820427	1.17957	0.359146		0.3161	0.3181	0.996846	1.00315	0.00630716		0.8069	0.7623	1.02898	0.972106	0.0568752		20.1236	29.0264	0.414927	1.20025	0.785324		6.7363	6.1323	1.04694	0.953064	0.0938719		18	21	0.923077	1.07692	0.153846		0.867	0.9755	0.941113	1.05889	0.117775		0.0629	0.0726	0.928413	1.07159	0.143173		0.454	0.4238
0.7551	0.8082	0.966033	1.03397	0.0679332		0.2968	0.3043	0.987523	1.01248	0.0249543		0.7835	0.7679	0.999141	0.979247	0.0198936		68.8396	74.0269	1.4194	3.06104	1.64164		8.7857	9.2912	0.972036	1.02796	0.0559277		7	7	1	1	0		0.5847	0.6017	0.985671	1.01433	0.0286581		0.0649	0.0654	0.996163	1.00384	0.0076746		0.4872	0.4876
0.7722	0.7155	1.03811	0.961887	0.076225		0.2634	0.2716	0.984673	1.01533	0.0306542		0.7673	0.7437	0.978482	0.948387	0.0300954		100.073	93.3389	2.06339	3.85959	1.7962		8.8923	9.6779	0.957696	1.0423	0.0846087		3	3	1	1	0		0.5645	0.5476	1.0152	0.984804	0.030393		0.0796	0.0815	0.988206	1.01179	0.0235878		0.4082	0.4246
0.5191	0.4828	1.03623	0.963769	0.0724623		0.2697	0.261	1.01639	0.983607	0.0327869		0.7044	0.7532	0.89827	0.960502	0.0622311		24.617	21.3142	0.507576	0.881349	0.373773		7.7105	7.8614	0.990309	1.00969	0.0193811		18	18	1	1	0		0.8258	0.794	1.01963	0.980368	0.0392641		0.0771	0.0821	0.968593	1.03141	0.0628141		0.343	0.328
0.6553	0.7245	0.949848	1.05015	0.100304		0.3586	0.3655	0.990471	1.00953	0.0190581		0.8189	0.764	1.04428	0.974274	0.07001		38.4651	56.5172	0.793109	2.337	1.5439		6.3163	5.8302	1.04002	0.95998	0.0800395		8	7	1.06667	0.933333	0.133333		0.6677	0.7504	0.941683	1.05832	0.116635		0.0643	0.0531	1.0954	0.9046	0.190801		0.456	0.4922
0.6003	0.5197	1.07196	0.928036	0.143929		0.1473	0.1532	0.980366	1.01963	0.0392679		0.7799	0.7799	0.99455	0.99455	0		27.5651	23.5482	0.568363	0.973726	0.405363		8.7035	10.0019	0.930587	1.06941	0.138826		8	8	1	1	0		0.9148	0.8442	1.04014	0.959864	0.0802729		0.0898	0.084	1.03337	0.966628	0.0667434		0.2924	0.3083
0.7591	0.7157	1.02943	0.970572	0.0588554		0.2697	0.275	0.99027	1.00973	0.0194603		0.7927	0.8239	1.01087	1.05066	0.0397871		17.2401	22.3075	0.355472	0.922423	0.56695		5.216	5.1653	1.00488	0.995116	0.00976756		14	18	0.875	1.125	0.25		1.0252	1.0684	0.979366	1.02063	0.0412686		0.0862	0.0854	1.00466	0.995338	0.00932401		0.2797	0.2841
0.7302	0.6986	1.02212	0.977884	0.0442329		0.2061	0.201	1.01253	0.987472	0.0250553		0.7637	0.7361	0.973891	0.938695	0.0351963		31.4731	27.2624	0.648941	1.12731	0.478368		8.2541	8.5666	0.981422	1.01858	0.0371566		7	7	1	1	0		0.9271	0.8943	1.01801	0.981992	0.0360163		0.0769	0.0786	0.989068	1.01093	0.021865		0.3772	0.3927
0.6359	0.5233	1.09714	0.902864	0.194272		0.3666	0.3499	1.02331	0.976692	0.0466155		0.8015	0.6925	1.0221	0.883095	0.139		64.2269	56.6713	1.32429	2.34338	1.01909		7.4423	7.1121	1.02269	0.977313	0.0453746		8	8	1	1	0		0.667	0.6487	1.01391	0.986091	0.0278179		0.0757	0.073	1.01816	0.981843	0.0363147		0.4042	0.4255
0.7567	0.7102	1.0317	0.9683	0.063399		0.3199	0.3187	1.00188	0.998121	0.00375822		0.8261	0.8231	1.05347	1.04964	0.00382568		122.75	63.6569	2.53097	2.63223	0.101259		6.407	6.7408	0.974612	1.02539	0.0507766		5	3	1.25	0.75	0.5		0.8105	0.755	1.03545	0.964548	0.0709039		0.0681	0.0684	0.997802	1.0022	0.0043956		0.4138	0.4178
0.6545	0.6759	0.983915	1.01609	0.0321708		0.2876	0.2835	1.00718	0.992821	0.0143583		0.7326	0.7501	0.934232	0.956548	0.0223165		17.9012	21.0624	0.369103	0.870937	0.501834		6.1741	5.8645	1.02572	0.974283	0.0514346		13	14	0.962963	1.03704	0.0740741		0.9574	1.0075	0.974503	1.0255	0.050995		0.0683	0.0703	0.98557	1.01443	0.02886		0.4274	0.4295
0.7334	0.7223	1.00763	0.992375	0.0152504		0.1797	0.1913	0.968733	1.03127	0.0625337		0.6724	0.7176	0.857463	0.915103	0.0576403		39.3076	29.9358	0.81048	1.23786	0.427375		10.2155	12.6253	0.894496	1.1055	0.211008		3	3	1	1	0		0.6986	0.6355	1.0473	0.952702	0.0945956		0.0755	0.0743	1.00801	0.991989	0.0160214		0.4369	0.4483
0.7437	0.6853	1.04087	0.959132	0.0817355		0.2397	0.2361	1.00757	0.992434	0.0151324		0.8049	0.7258	1.02643	0.92556	0.100871		90.0537	103.195	1.85681	4.26716	2.41035		9.1244	9.3987	0.985191	1.01481	0.0296171		3	4	0.857143	1.14286	0.285714		0.6844	0.6465	1.02848	0.971523	0.0569539		0.0837	0.0807	1.01825	0.981752	0.0364964		0.4421	0.4309
0.8229	0.7616	1.03869	0.961313	0.0773746		0.16	0.1667	0.979492	1.02051	0.0410162		0.8846	0.8819	1.12807	1.12462	0.00344311		27.4076	31.9862	0.565115	1.32264	0.757525		9.1399	8.7975	1.01909	0.980911	0.0381772		4	5	0.888889	1.11111	0.222222		0.8869	0.9256	0.978648	1.02135	0.0427034		0.0971	0.0937	1.01782	0.98218	0.0356394		0.3026	0.3384
0.7793	0.7241	1.03672	0.963283	0.0734336		0.3799	0.3961	0.979124	1.02088	0.0417526		0.8631	0.8681	1.10065	1.10703	0.00637614		98.9003	96.845	2.03922	4.00457	1.96536		6.9689	7.0394	0.994967	1.00503	0.0100655		5	8	0.769231	1.23077	0.461538		0.5912	0.5846	1.00561	0.994387	0.0112264		0.0828	0.0804	1.01471	0.985294	0.0294118		0.4011	0.4342
0.7006	0.6754	1.01831	0.981686	0.0366279		0.1732	0.1586	1.044	0.955998	0.0880048		0.891	0.8853	1.13623	1.12896	0.0072688		10.3242	11.5791	0.212874	0.4788	0.265926		7.3221	6.1821	1.08442	0.915582	0.168836		8	10	0.888889	1.11111	0.222222		1.4311	1.5598	0.956969	1.04303	0.0860611		0.1886	0.2031	0.962982	1.03702	0.0740363		0.2975	0.3034
0.6299	0.6189	1.00881	0.991192	0.0176169		0.3102	0.3235	0.979012	1.02099	0.0419757		0.8574	0.6759	1.09338	0.861926	0.231454		156.096	149.105	3.21852	6.16552	2.947		7.7442	7.9158	0.989042	1.01096	0.0219157		1	1	1	1	0		0.5615	0.563	0.998666	1.00133	0.00266785		0.0774	0.0792	0.988506	1.01149	0.0229885		0.4441	0.449
0.6983	0.6295	1.05182	0.948185	0.10363		0.2675	0.2737	0.988544	1.01146	0.022912		0.7733	0.7749	0.986134	0.988174	0.00204036		36.8683	35.0298	0.760185	1.44849	0.688309		8.735	9.2216	0.972901	1.0271	0.0541973		10	11	0.952381	1.04762	0.0952381		0.6775	0.6402	1.02831	0.971693	0.0566138		0.0881	0.0891	0.994357	1.00564	0.0112867		0.4251	0.4188
0.5416	0.5248	1.01575	0.984246	0.0315079		0.3471	0.3472	0.999856	1.00014	0.00028806		0.8097	0.8102	1.03255	1.03319	0.000637614		53.6216	53.8063	1.10562	2.22491	1.11929		7.1051	6.8907	1.01532	0.984681	0.0306378		8	8	1	1	0		0.6112	0.6154	0.996576	1.00342	0.0068482		0.101	0.1031	0.989711	1.01029	0.0205781		0.4016	0.403
0.5523	0.5322	1.01853	0.981466	0.0370678		0.2161	0.2152	1.00209	0.997913	0.00417343		0.8571	0.868	1.093	1.1069	0.0139		25.6895	29.0094	0.52969	1.19955	0.669859		7.4937	7.5024	0.99942	1.00058	0.0011603		9	9	1	1	0		0.8328	0.8302	1.00156	0.998437	0.00312688		0.0859	0.0853	1.0035	0.996495	0.00700935		0.5246	0.5294
0.5814	0.5549	1.02332	0.976679	0.0466426		0.285	0.2893	0.992513	1.00749	0.0149748		0.7861	0.7945	1.00246	1.01317	0.0107119		22.0862	20.7889	0.455394	0.859628	0.404234		6.6704	6.877	0.98475	1.01525	0.0305003		13	14	0.962963	1.03704	0.0740741		0.8663	0.8561	1.00592	0.994078	0.0118439		0.1121	0.114	0.991597	1.0084	0.0168067		0.3115	0.3057
0.6781	0.6751	1.00222	0.997783	0.00443393		0.3169	0.3029	1.02259	0.977412	0.0451759		0.6926	0.6947	0.883223	0.885901	0.00267798		31.4243	30.4967	0.647935	1.26105	0.613114		7.314	7.5972	0.981008	1.01899	0.0379849		10	11	0.952381	1.04762	0.0952381		0.7644	0.7347	1.01981	0.980188	0.0396238		0.1565	0.1552	1.00417	0.995829	0.00834135		0.2918	0.2693
0.6726	0.6897	0.987448	1.01255	0.0251046		0.2918	0.2977	0.989992	1.01001	0.020017		0.85	0.8358	1.08394	1.06584	0.0181082		81.8182	83.2732	1.687	3.44337	1.75637		7.8764	7.8068	1.00444	0.995562	0.00887574		2	2	1	1	0		0.6015	0.5965	1.00417	0.995826	0.00834725		0.0729	0.0724	1.00344	0.996559	0.00688231		0.6025	0.6065
0.5308	0.541	0.990483	1.00952	0.0190334		0.3229	0.323	0.999845	1.00015	0.000309645		0.7886	0.7857	1.00564	1.00195	0.00369816		46.5548	53.2637	0.95991	2.20247	1.24256		5.0842	5.0637	1.00202	0.99798	0.00404024		8	7	1.06667	0.933333	0.133333		0.8464	0.8513	0.997114	1.00289	0.00577252		0.1254	0.1205	1.01993	0.980073	0.0398536		0.2609	0.2693
0.5164	0.5226	0.994033	1.00597	0.0119346		0.3287	0.3418	0.980462	1.01954	0.0390753		0.8259	0.8383	1.05321	1.06902	0.0158128		29.5945	26.1187	0.610207	1.08002	0.46981		5.2616	5.2908	0.997233	1.00277	0.00553429		10	11	0.952381	1.04762	0.0952381		0.8886	0.8843	1.00243	0.997575	0.00485081		0.1061	0.1004	1.0276	0.972397	0.0552058		0.3976	0.4091
0.5798	0.5769	1.00251	0.997493	0.00501426		0.3483	0.3459	1.00346	0.996543	0.00691443		0.8404	0.8468	1.0717	1.07986	0.00816146		31.0887	31.1175	0.641015	1.28672	0.645704		6.5058	6.5884	0.993692	1.00631	0.0126163		13	13	1	1	0		0.7669	0.7692	0.998503	1.0015	0.0029946		0.1076	0.1055	1.00985	0.990145	0.0197091		0.424	0.4236
0.613	0.5754	1.03164	0.968361	0.0632784		0.2806	0.2886	0.985945	1.01405	0.0281096		0.7207	0.7131	0.919057	0.909365	0.00969173		36.5977	37.1968	0.754605	1.5381	0.783495		5.4346	5.5231	0.991923	1.00808	0.016153		4	4	1	1	0		0.9067	0.8995	1.00399	0.996014	0.00797254		0.0896	0.0883	1.00731	0.992693	0.014615		0.4556	0.4571
0.608	0.5786	1.02478	0.975223	0.0495533		0.2657	0.2625	1.00606	0.993942	0.0121166		0.7471	0.8008	0.952723	1.0212	0.0684797		27.0901	28.0386	0.558569	1.15941	0.600837		5.4895	5.8729	0.966257	1.03374	0.0674857		10	11	0.952381	1.04762	0.0952381		0.9375	0.8993	1.0208	0.979203	0.0415941		0.0941	0.094	1.00053	0.999468	0.00106326		0.6233	0.6225
0.6314	0.589	1.03474	0.965257	0.0694854		0.2146	0.2111	1.00822	0.991778	0.0164435		0.7468	0.7621	0.95234	0.971851	0.019511		26.0619	26.9289	0.537368	1.11352	0.576151		8.2412	8.0217	1.0135	0.986503	0.026994		9	9	1	1	0		0.8526	0.8505	1.00123	0.998767	0.00246609		0.1091	0.1142	0.977161	1.02284	0.0456785		0.6634	0.6719
0.5012	0.5077	0.993557	1.00644	0.0128853		0.2685	0.2634	1.00959	0.990412	0.0191765		0.7795	0.7636	0.99404	0.973764	0.0202761		25.4555	25.8203	0.524865	1.06768	0.542813		7.1612	6.9696	1.01356	0.986441	0.0271181		11	11	1	1	0		0.862	0.8863	0.986101	1.0139	0.0277984		0.0852	0.085	1.00118	0.998825	0.00235018		0.6393	0.635
						0.289133	0.290176	0.998573	1.00143	0.0311852
			CV Sc ECC						CV Frac AREA						CV ECC						CV AVG OBJ						CV Peak Len						CV no. obj.						CV prim div area						CV hue
			0.0644029				0.289655		0.0311852						0.0326992						0.933834						0.0519571						0.1118						0.0436299						0.0463774
		smith	0.073633					smith	0.0350794					smith	0.0373671					smith	0.97527					smith	0.0601986					smith	0.131532					smith	0.0520094					smith	0.0537829
		field	0.0313285					field	0.0172312					field	0.0159722					field	0.785353					field	0.022425					field	0.0410935					field	0.0136033					field	0.0198411
		min	0.00421326					min	0.00028806					min	0					min	0.101259					min	0.0011603					min	0					min	0.000712885					min	0.00104112
		max	0.359146					max	0.119448					max	0.231454					max	4.2797					max	0.237722					max	0.5					max	0.199347					max	0.393313
[truncated: 63 more columns]

## Sheet: Front
Front SC ECC						Front frac area						FrontECC						FrontAVG OBJ						FrontPeak LEn						Frontno. obj.						Frontperim div area						Fronthue						Frontsaturatn
image 1	image 2	image 1 Norm	image 2 Norm	diff		image 1	image 2	image 1 Norm	image 2 Norm	diff		image 1	image 2	image 1 Norm	image 2 Norm	diff		image 1	image 2	image 1 Norm	image 2 Norm	diff		image 1	image 2	image 1 Norm	image 2 Norm	diff		image 1	image 2	image 1 Norm	image 2 Norm	diff		image 1	image 2	image 1 Norm	image 2 Norm	diff		image 1	image 2	image 1 Norm	image 2 Norm	diff		image 1	image 2
0.7998	0.7943	1.00345	0.99655	0.00690045		0.3489	0.3213	1.04118	0.958818	0.0823635		0.6332	0.6368	0.753021	0.757303	0.00428123		17.0091	23.7339	0.803534	1.12122	0.317689		4.0504	4.4264	0.955644	1.04436	0.0887127		5	4	1.11111	0.888889	0.222222		1.0744	1.1649	0.959586	1.04041	0.0808288		0.0864	0.0861	1.00174	0.998261	0.00347826		0.3581	0.3669
0.6024	0.6211	0.984716	1.01528	0.030568		0.2955	0.2965	0.998311	1.00169	0.00337838		0.866	0.887	1.02987	1.05485	0.0249739		20.6519	21.4142	0.975625	1.01164	0.0360121		4.9594	5.0922	0.986788	1.01321	0.0264237		8	7	1.06667	0.933333	0.133333		1.1069	1.1572	0.977784	1.02222	0.0444327		0.0846	0.0855	0.994709	1.00529	0.010582		0.4017	0.3968
0.7311	0.7409	0.993342	1.00666	0.0133152		0.3591	0.3582	1.00125	0.998745	0.00250941		0.7919	0.7938	0.941753	0.944012	0.00225954		52.5982	54.9254	2.48481	2.59475	0.10994		5.0711	5.6159	0.949022	1.05098	0.101956		2	2	1	1	0		0.8791	0.8979	0.98942	1.01058	0.0211593		0.0832	0.0839	0.995811	1.00419	0.00837822		0.437	0.4412
0.8599	0.8502	1.00567	0.994328	0.0113444		0.3053	0.3063	0.998365	1.00164	0.00327011		0.8657	0.8632	1.02952	1.02654	0.00297308		11.6177	12.8449	0.548836	0.606811	0.0579746		5.1331	5.5076	0.964805	1.0352	0.0703901		12	11	1.04348	0.956522	0.0869565		1.2717	1.3096	0.985317	1.01468	0.029365		0.0886	0.0917	0.982806	1.01719	0.0343871		0.3096	0.3052
0.7703	0.7797	0.993935	1.00606	0.012129		0.179	0.2145	0.909784	1.09022	0.180432		0.8498	0.8816	1.01061	1.04843	0.0378176		7.4742	6.2691	0.353092	0.296161	0.0569306		4.1868	5.0234	0.909166	1.09083	0.181668		9	9	1	1	0		1.7473	1.894	0.959712	1.04029	0.0805756		0.1326	0.1233	1.03634	0.963658	0.0726846		0.3633	0.3995
0.8466	0.833	1.0081	0.991903	0.0161943		0.2065	0.2116	0.987802	1.0122	0.0243961		0.6563	0.6746	0.780493	0.802256	0.0217629		18.7444	24.7964	0.885512	1.17142	0.285905		7.071	8.2706	0.921807	1.07819	0.156385		4	3	1.14286	0.857143	0.285714		0.9386	0.9959	0.97038	1.02962	0.0592401		0.084	0.0837	1.00179	0.998211	0.00357782		0.4605	0.4676
0.8149	0.8193	0.997308	1.00269	0.0053849		0.2326	0.2461	0.971799	1.0282	0.0564028		0.8674	0.8174	1.03154	0.972078	0.0594616		13.9098	14.4159	0.657118	0.681027	0.0239089		4.9157	5.4439	0.949013	1.05099	0.101973		19	14	1.15152	0.848485	0.30303		1.2907	1.3998	0.95945	1.04055	0.0811002		0.1179	0.1133	1.0199	0.980104	0.0397924		0.3108	0.3197
0.8188	0.8207	0.998841	1.00116	0.00231778		0.2707	0.2794	0.984185	1.01582	0.0316306		0.8273	0.8551	0.983851	1.01691	0.0330606		10.269	11.4419	0.485122	0.540531	0.0554094		4.4041	4.6631	0.971436	1.02856	0.057129		8	7	1.06667	0.933333	0.133333		1.2823	1.3771	0.964353	1.03565	0.0712943		0.1186	0.1218	0.986689	1.01331	0.0266223		0.4529	0.454
0.5329	0.5463	0.987583	1.01242	0.0248332		0.3154	0.3082	1.01155	0.988454	0.0230917		0.8347	0.8747	0.992652	1.04022	0.0475693		20.5147	19.1535	0.969143	0.904838	0.064305		4.7546	4.9054	0.984389	1.01561	0.0312215		5	6	0.909091	1.09091	0.181818		0.994	1.0231	0.985573	1.01443	0.0288533		0.099	0.1009	0.990495	1.0095	0.0190095		0.5815	0.5726
0.3782	0.4423	0.921877	1.07812	0.156246		0.2282	0.2197	1.01898	0.981023	0.0379549		0.8432	0.834	1.00276	0.991819	0.0109409		23.9717	17.3333	1.13246	0.818849	0.313607		6.8084	6.1014	1.05476	0.945235	0.109529		10	10	1	1	0		0.9749	0.9086	1.0352	0.9648	0.0704008		0.0784	0.0794	0.993663	1.00634	0.0126743		0.4727	0.4672
0.862	0.8617	1.00017	0.999826	0.000348088		0.3119	0.3095	1.00386	0.996138	0.00772449		0.893	0.8967	1.06198	1.06638	0.00440016		32.1447	33.1156	1.51856	1.56443	0.0458667		6.332	6.5804	0.980763	1.01924	0.0384746		5	5	1	1	0		0.7851	0.7916	0.995877	1.00412	0.00824507		0.0927	0.0925	1.00108	0.99892	0.00215983		0.4657	0.466
0.6542	0.6542	1	1	0		0.3597	0.3651	0.99255	1.00745	0.0149007		0.8714	0.8746	1.0363	1.0401	0.00380554		21.8386	21.4248	1.03169	1.01214	0.0195485		5.1298	5.2205	0.991237	1.00876	0.0175261		8	8	1	1	0		1.0468	1.0306	1.0078	0.992202	0.0155964		0.1052	0.1034	1.00863	0.991371	0.0172579		0.3339	0.3364
0.469	0.512	0.956167	1.04383	0.0876656		0.2344	0.2656	0.9376	1.0624	0.1248		0.816	0.8842	0.970413	1.05152	0.0811056		21.3239	13.4612	1.00737	0.635926	0.371445		5.8078	5.5375	1.02382	0.976175	0.0476497		8	11	0.842105	1.15789	0.315789		1.2001	1.128	1.03097	0.969031	0.0619389		0.0835	0.0751	1.05296	0.947037	0.105927		0.3482	0.3572
0.7859	0.8	0.991109	1.00889	0.0177817		0.2387	0.2503	0.976278	1.02372	0.0474438		0.8738	0.8888	1.03915	1.05699	0.0178385		14.5371	15.0575	0.686753	0.711337	0.0245844		5.9404	5.9021	1.00323	0.996766	0.00646823		6	6	1	1	0		1.0406	1.0918	0.975989	1.02401	0.048021		0.1007	0.0992	1.0075	0.992496	0.0150075		0.5535	0.5585
0.7055	0.7113	0.995906	1.00409	0.00818746		0.2608	0.2637	0.994471	1.00553	0.0110582		0.8527	0.8713	1.01406	1.03618	0.0221197		20.0482	17.631	0.947105	0.832913	0.114192		6.05	6.0098	1.00333	0.996667	0.00666678		8	9	0.941176	1.05882	0.117647		1.0211	1.0139	1.00354	0.996462	0.00707617		0.0972	0.0982	0.994882	1.00512	0.0102354		0.4363	0.4398
0.4398	0.4774	0.959006	1.04099	0.0819887		0.2727	0.2862	0.975845	1.02415	0.0483092		0.8467	0.8717	1.00692	1.03665	0.0297308		12.1022	13.0101	0.571725	0.614615	0.0428905		5.3066	5.7668	0.958441	1.04156	0.0831181		11	10	1.04762	0.952381	0.0952381		1.2237	1.2382	0.99411	1.00589	0.0117795		0.0788	0.08	0.992443	1.00756	0.0151134		0.4671	0.4613
0.6759	0.6699	1.00446	0.995542	0.00891663		0.2892	0.2727	1.02936	0.970635	0.0587293		0.8695	0.9122	1.03404	1.08482	0.0507802		17.2342	29.6443	0.814168	1.40044	0.58627		5.4692	5.5596	0.991803	1.0082	0.0163934		3	3	1	1	0		1.1215	1.1416	0.991118	1.00888	0.0177632		0.0761	0.077	0.994121	1.00588	0.011757		0.432	0.4244
0.807	0.7992	1.00486	0.995144	0.00971236		0.2423	0.2389	1.00707	0.992934	0.0141313		0.7593	0.7614	0.902984	0.905481	0.00249739		21.4612	22.3035	1.01386	1.05365	0.0397914		5.9011	6.0741	0.985553	1.01445	0.028893		3	3	1	1	0		0.9655	0.9824	0.991324	1.00868	0.017352		0.0787	0.0786	1.00064	0.999364	0.00127146		0.4003	0.399
0.5858	0.5963	0.991118	1.00888	0.017765		0.2541	0.2639	0.981081	1.01892	0.0378378		0.8335	0.8224	0.991225	0.978024	0.0132005		15.664	14.291	0.739989	0.675127	0.0648624		5.5428	5.8869	0.969894	1.03011	0.0602116		5	5	1	1	0		1.1546	1.0916	1.02805	0.971953	0.0560947		0.1015	0.107	0.973621	1.02638	0.0527578		0.4173	0.4158
0.1259	0.0836	1.20191	0.798091	0.403819		0.2309	0.2249	1.01316	0.986836	0.0263273		0.9251	0.9174	1.10016	1.091	0.00915708		35.0232	29.6908	1.65454	1.40263	0.25191		8.3064	8.2175	1.00538	0.99462	0.0107602		12	11	1.04348	0.956522	0.0869565		0.8809	0.8388	1.02448	0.975519	0.048962		0.0978	0.0945	1.01716	0.982839	0.0343214		0.3912	0.3914
0.2817	0.2553	1.04916	0.950838	0.098324		0.2755	0.261	1.02703	0.972973	0.0540541		0.755	0.7755	0.89787	0.922249	0.0243792		20.8223	28.6715	0.983674	1.35448	0.370807		5.6388	6.4401	0.933661	1.06634	0.132678		8	6	1.14286	0.857143	0.285714		0.9708	1.0565	0.957727	1.04227	0.0845459		0.0645	0.0643	1.00155	0.998447	0.00310559		0.4308	0.4289
0.6391	0.6181	1.0167	0.983296	0.0334076		0.3264	0.3043	1.03504	0.96496	0.0700809		0.8495	0.856	1.01025	1.01798	0.00773001		27.2214	34.3122	1.28598	1.62096	0.334979		6.0829	6.6811	0.953134	1.04687	0.0937324		8	7	1.06667	0.933333	0.133333		0.8584	0.9409	0.954149	1.04585	0.0917023		0.0665	0.0674	0.993279	1.00672	0.0134429		0.3665	0.3584
0.3343	0.1777	1.30586	0.694141	0.611719		0.2268	0.2074	1.04468	0.95532	0.0893597		0.7554	0.7735	0.898346	0.919871	0.0215251		17.509	21.8208	0.82715	1.03085	0.203695		6.5472	6.6293	0.993769	1.00623	0.0124616		7	8	0.933333	1.06667	0.133333		0.9871	1.0976	0.946995	1.05301	0.10601		0.1081	0.1064	1.00793	0.992075	0.0158508		0.442	0.4317
0.4022	0.3147	1.12205	0.877947	0.244107		0.3118	0.3174	0.9911	1.0089	0.0178004		0.8013	0.8407	0.952931	0.999787	0.0468557		24.9092	36.9951	1.17675	1.7477	0.570955		5.5117	5.8263	0.972253	1.02775	0.0554948		19	17	1.05556	0.944444	0.111111		0.8837	0.9268	0.976194	1.02381	0.0476112		0.0638	0.0627	1.0087	0.991304	0.0173913		0.3953	0.3993
0.5125	0.5053	1.00707	0.992926	0.0141482		0.2168	0.2074	1.02216	0.977841	0.0443187		0.7872	0.8105	0.936163	0.963872	0.0277091		8.633	12.8014	0.407835	0.604756	0.196921		5.3977	5.9673	0.949881	1.05012	0.100238		13	9	1.18182	0.818182	0.363636		1.2441	1.4684	0.917309	1.08269	0.165382		0.0847	0.0747	1.06274	0.937265	0.125471		0.3748	0.3726
0.6581	0.6348	1.01802	0.981978	0.036043		0.2993	0.3005	0.997999	1.002	0.00400133		0.874	0.8449	1.03939	1.00478	0.0346066		19.8203	27.7356	0.936339	1.31027	0.37393		5.5001	5.8198	0.971758	1.02824	0.0564846		7	5	1.16667	0.833333	0.333333		1.0265	1.0425	0.992267	1.00773	0.0154664		0.0671	0.0654	1.01283	0.98717	0.0256604		0.4023	0.4058
0.2888	0.2042	1.1716	0.828398	0.343205		0.2177	0.212	1.01327	0.986735	0.0265301		0.8843	0.8629	1.05164	1.02619	0.0254496		18.0625	14.0535	0.853298	0.663907	0.189391		6.4352	5.8929	1.04399	0.956011	0.0879779		11	10	1.04762	0.952381	0.0952381		1.1455	1.1007	1.01994	0.980055	0.0398896		0.0726	0.0711	1.01044	0.989562	0.0208768		0.4713	0.4717
0.6253	0.6094	1.01288	0.987122	0.0257552		0.2767	0.2822	0.990159	1.00984	0.0196815		0.9449	0.9444	1.1237	1.12311	0.000594616		32.1911	31.5248	1.52075	1.48928	0.0314769		6.1892	5.9796	1.01722	0.982776	0.0344488		3	3	1	1	0		0.9539	0.9245	1.01565	0.984348	0.0313032		0.094	0.0946	0.996819	1.00318	0.00636267		0.3896	0.3979
0.5439	0.5654	0.980618	1.01938	0.0387632		0.2713	0.2883	0.969621	1.03038	0.0607577		0.8474	0.8403	1.00775	0.999311	0.00844354		18.0863	12.1788	0.854422	0.575343	0.279079		5.4154	4.9939	1.04049	0.959507	0.0809853		7	9	0.875	1.125	0.25		1.3164	1.1636	1.06161	0.938387	0.123226		0.0834	0.0821	1.00785	0.992145	0.01571		0.3382	0.3494
0.6521	0.6641	0.990883	1.00912	0.0182343		0.3744	0.3576	1.02295	0.977049	0.0459016		0.7665	0.7814	0.911546	0.929266	0.0177196		42.0224	66.9308	1.9852	3.1619	1.17671		4.9891	5.092	0.989793	1.01021	0.0204144		3	2	1.2	0.8	0.4		0.9095	1.047	0.929721	1.07028	0.140557		0.087	0.0879	0.994854	1.00515	0.0102916		0.383	0.3838
0.6869	0.6888	0.998619	1.00138	0.00276223		0.2084	0.1989	1.02332	0.976676	0.0466487		0.8379	0.7967	0.996457	0.947461	0.0489963		11.5398	13.6963	0.545156	0.647032	0.101876		5.634	5.9674	0.971262	1.02874	0.0574758		8	7	1.06667	0.933333	0.133333		1.3713	1.3641	1.00263	0.997368	0.00526431		0.095	0.0905	1.02426	0.975741	0.0485175		0.2631	0.2603
0.371	0.3086	1.09182	0.908181	0.183637		0.2458	0.2252	1.04374	0.956263	0.0874735		0.8748	0.8535	1.04034	1.01501	0.0253306		15.3287	16.9106	0.724149	0.79888	0.0747312		4.961	5.0401	0.992091	1.00791	0.0158183		7	7	1	1	0		1.2628	1.3719	0.958591	1.04141	0.0828178		0.075	0.0744	1.00402	0.995984	0.00803213		0.3344	0.3265
0.6796	0.6753	1.00317	0.996826	0.00634733		0.1803	0.1889	0.976706	1.02329	0.0465872		0.8529	0.8624	1.0143	1.02559	0.0112977		17.0607	21.4447	0.805971	1.01308	0.207106		6.5035	7.4028	0.935331	1.06467	0.129337		5	4	1.11111	0.888889	0.222222		1.0688	1.1086	0.981721	1.01828	0.0365574		0.0756	0.0793	0.976114	1.02389	0.0477728		0.3875	0.3867
0.5307	0.5556	0.977078	1.02292	0.0458437		0.3066	0.3038	1.00459	0.995413	0.00917431		0.7939	0.794	0.944131	0.94425	0.000118923		21.0063	21.1583	0.992367	0.999548	0.00718069		5.5596	5.5819	0.997998	1.002	0.00400305		11	11	1	1	0		0.9558	0.959	0.998329	1.00167	0.00334239		0.0856	0.0841	1.00884	0.991161	0.0176783		0.3785	0.3819
0.5689	0.5546	1.01273	0.987272	0.0254562		0.3271	0.3214	1.00879	0.99121	0.017579		0.8861	0.952	1.05378	1.13215	0.0783704		44.3536	34.5905	2.09533	1.6341	0.461222		5.499	5.3469	1.01402	0.985976	0.0280475		3	4	0.857143	1.14286	0.285714		1.0222	1.0173	1.0024	0.997597	0.0048051		0.0808	0.0794	1.00874	0.991261	0.0174782		0.4115	0.4102
0.7854	0.8214	0.977595	1.0224	0.0448096		0.2579	0.2555	1.00467	0.995325	0.00934944		0.7414	0.7392	0.881696	0.87908	0.00261631		13.1955	8.1228	0.623374	0.383732	0.239641		4.7713	4.0456	1.08231	0.917692	0.164616		9	9	1	1	0		1.4883	1.2234	1.09769	0.902312	0.195376		0.0768	0.0706	1.04206	0.957938	0.0841248		0.4174	0.4184
0.1688	0.2924	0.732003	1.268	0.535993		0.1901	0.1643	1.0728	0.927201	0.145598		0.7848	0.6851	0.933309	0.814743	0.118566		12.5486	18.6636	0.592813	0.881694	0.288881		7.1275	6.9009	1.01615	0.983847	0.0323059		7	7	1	1	0		1.1779	1.1398	1.01644	0.983561	0.0328774		0.0779	0.0762	1.01103	0.988968	0.0220636		0.3931	0.3737
0.644	0.6573	0.989779	1.01022	0.0204411		0.2061	0.2054	1.0017	0.998299	0.00340219		0.9622	0.9626	1.14428	1.14475	0.000475693		36.4034	37.944	1.71975	1.79253	0.0727801		7.1792	7.2713	0.993627	1.00637	0.012747		3	3	1	1	0		0.937	0.9585	0.988657	1.01134	0.0226853		0.0806	0.0834	0.982927	1.01707	0.0341463		0.4431	0.4405
0.5244	0.4852	1.03883	0.961173	0.0776545		0.1863	0.1769	1.02588	0.974119	0.0517621		0.8913	0.8899	1.05996	1.0583	0.00166492		8.2527	7.8835	0.389869	0.372428	0.0174415		5.3359	4.9909	1.03341	0.966592	0.0668164		7	8	0.933333	1.06667	0.133333		1.572	1.5463	1.00824	0.991758	0.0164833		0.0908	0.094	0.982684	1.01732	0.034632		0.3305	0.3232
0.7081	0.7267	0.987037	1.01296	0.025927		0.3358	0.3164	1.02975	0.970255	0.059491		0.6294	0.8148	0.748502	0.968986	0.220484		23.6915	23.7849	1.11922	1.12363	0.00441235		4.1413	4.0147	1.01552	0.984478	0.0310446		2	2	1	1	0		1.212	1.1371	1.03188	0.968115	0.0637691		0.0816	0.0789	1.01682	0.983178	0.0336449		0.3982	0.394
0.758	0.759	0.999341	1.00066	0.00131839		0.1958	0.1951	1.00179	0.998209	0.00358148		0.8735	0.9425	1.03879	1.12085	0.082057		9.281	5.8792	0.438447	0.277742	0.160706		5.1844	4.6373	1.0557	0.944297	0.111406		7	6	1.07692	0.923077	0.153846		2.0529	1.8544	1.0508	0.949198	0.101605		0.1071	0.0943	1.06356	0.936445	0.12711		0.2863	0.2999
0.5364	0.5455	0.991589	1.00841	0.0168223		0.3017	0.3093	0.987561	1.01244	0.0248773		0.941	0.9393	1.11907	1.11705	0.00202169		16.9474	16.5175	0.800619	0.78031	0.0203091		4.019	4.0821	0.992211	1.00779	0.0155781		3	3	1	1	0		1.3054	1.256	1.01929	0.980714	0.0385727		0.0777	0.08	0.985415	1.01458	0.0291693		0.4084	0.4163
0.4099	0.3409	1.0919	0.908098	0.183804		0.2696	0.2728	0.9941	1.0059	0.0117994		0.8586	0.8179	1.02107	0.972673	0.0484017		11.3088	12.7638	0.534243	0.60298	0.0687362		4.3748	4.4602	0.990334	1.00967	0.0193322		8	7	1.06667	0.933333	0.133333		1.468	1.4276	1.01395	0.986048	0.0279044		0.0997	0.0993	1.00201	0.99799	0.0040201		0.4173	0.4146
0.5905	0.54	1.04467	0.95533	0.089341		0.1256	0.1316	0.976672	1.02333	0.0466563		0.9115	0.9231	1.08398	1.09778	0.0137951		10.0372	9.5525	0.474171	0.451273	0.0228979		7.3801	6.9051	1.03325	0.966749	0.0665024		4	4	1	1	0		1.4957	1.4727	1.00775	0.992252	0.0154966		0.1763	0.1837	0.979444	1.02056	0.0411111		0.1487	0.1498
0.6689	0.6527	1.01226	0.987742	0.0245157		0.2242	0.2262	0.99556	1.00444	0.00888099		0.8792	0.8784	1.04557	1.04462	0.000951385		27.2459	28.7573	1.28713	1.35853	0.0714006		7.2647	7.3762	0.992384	1.00762	0.0152313		5	5	1	1	0		0.8348	0.8597	0.985305	1.01469	0.0293892		0.088	0.088	1	1	0		0.4698	0.4677
0.7874	0.7847	1.00172	0.998283	0.0034349		0.3358	0.325	1.01634	0.983656	0.0326877		0.805	0.7779	0.957331	0.925103	0.0322282		12.5729	16.2247	0.593961	0.766477	0.172516		4.7899	4.4852	1.03285	0.967149	0.0657028		15	13	1.07143	0.928571	0.142857		1.1335	1.1816	0.979223	1.02078	0.0415533		0.0995	0.0997	0.998996	1.001	0.00200803		0.295	0.291
0.905	0.8814	1.01321	0.986789	0.0264219		0.3163	0.3012	1.02445	0.975547	0.0489069		0.7633	0.8418	0.90774	1.0011	0.0933547		15.943	19.8137	0.75317	0.936027	0.182857		5.6577	5.6277	1.00266	0.997342	0.0053166		7	6	1.07692	0.923077	0.153846		0.9561	1.0071	0.974022	1.02598	0.051956		0.1972	0.1946	1.00664	0.993364	0.0132721		0.2076	0.2177
0.8064	0.8046	1.00112	0.998883	0.00223464		0.3266	0.3252	1.00215	0.997852	0.0042958		0.8189	0.8923	0.973862	1.06115	0.0872896		24.5723	31.0327	1.16083	1.46603	0.305198		5.0201	5.0595	0.996091	1.00391	0.00781777		5	4	1.11111	0.888889	0.222222		0.931	0.9066	1.01328	0.986722	0.0265564		0.0732	0.0727	1.00343	0.996573	0.00685401		0.4878	0.4888
0.7874	0.7829	1.00287	0.997134	0.00573139		0.1532	0.1516	1.00525	0.994751	0.0104987		0.7925	0.7958	0.942466	0.946391	0.00392446		8.3255	8.9503	0.393308	0.422825	0.0295164		4.8791	5.0804	0.979788	1.02021	0.0404237		9	9	1	1	0		1.5049	1.5655	0.980263	1.01974	0.0394737		0.211	0.211	1	1	0		0.1425	0.1425
0.6666	0.669	0.998203	1.0018	0.00359389		0.324	0.3255	0.997691	1.00231	0.00461894		0.8763	0.8668	1.04212	1.03083	0.0112977		24.7782	25.3183	1.17056	1.19607	0.0255151		4.7443	5.1563	0.958386	1.04161	0.0832273		6	6	1	1	0		0.9918	1.0317	0.980282	1.01972	0.0394366		0.146	0.1132	1.12654	0.873457	0.253086		0.236	0.2531
0.7341	0.7231	1.00755	0.992451	0.0150974		0.3904	0.3962	0.992626	1.00737	0.014747		0.806	0.8417	0.958521	1.00098	0.0424556		18.7598	21.946	0.886239	1.03676	0.150521		4.8051	4.95	0.985146	1.01485	0.0297075		13	11	1.08333	0.916667	0.166667		0.9644	0.98	0.991977	1.00802	0.0160461		0.1264	0.1247	1.00677	0.99323	0.0135404		0.2186	0.2281
0.8296	0.8516	0.986914	1.01309	0.0261718		0.3256	0.3283	0.995871	1.00413	0.00825814		0.8766	0.8717	1.04248	1.03665	0.00582723		18.1521	19.2335	0.857531	0.908617	0.0510868		3.9336	4.0007	0.991543	1.00846	0.0169139		3	3	1	1	0		1.2819	1.3289	0.981998	1.018	0.0360043		0.0812	0.0819	0.995708	1.00429	0.00858369		0.4279	0.4227
0.442	0.5099	0.928669	1.07133	0.142662		0.2037	0.204	0.999264	1.00074	0.00147167		0.9001	0.9083	1.07043	1.08018	0.0097517		25.3423	23.4891	1.19721	1.10966	0.0875478		7.2558	7.3771	0.99171	1.00829	0.0165791		12	13	0.96	1.04	0.08		0.8727	0.8643	1.00484	0.995164	0.00967185		0.1034	0.0914	1.0616	0.938398	0.123203		0.5054	0.5421
0.5487	0.5502	0.998635	1.00137	0.00273		0.2535	0.2435	1.02012	0.979879	0.0402414		0.8128	0.8461	0.966607	1.00621	0.0396014		35.2159	28.5127	1.66365	1.34698	0.316669		8.6629	7.7506	1.05558	0.944418	0.111165		13	17	0.866667	1.13333	0.266667		0.7678	0.7238	1.0295	0.970501	0.0589971		0.1131	0.1251	0.949622	1.05038	0.100756		0.4857	0.4591
0.8787	0.8729	1.00331	0.996689	0.00662252		0.2926	0.3123	0.967433	1.03257	0.0651347		0.9189	0.923	1.09278	1.09766	0.00487585		25.1515	28.863	1.18819	1.36353	0.175336		4.2162	4.7207	0.943549	1.05645	0.112903		4	4	1	1	0		1.2385	1.2824	0.982586	1.01741	0.0348288		0.0833	0.0816	1.01031	0.989691	0.0206186		0.5994	0.6018
			CV Sc ECC						CV Frac AREA						CV ECC						CV AVG OBJ						CV Peak Len						CV no. obj.						CV prim div area						CV hue
			0.0708818						0.0376891						0.0305546						0.180492						0.0577542						0.112032						0.0497681						0.0335015
		smith	0.0825567					smith	0.0415465					smith	0.03105					smith	0.193861					smith	0.0605812					smith	0.119291					smith	0.0543682					smith	0.0292918
		field	0.0290464					field	0.0238665					field	0.0287794					field	0.132588					field	0.0476241					field	0.0860216					field	0.0332842					field	0.0485861
		min	0					min	0.00147167					min	0.000118923					min	0.00441235					min	0.00400305					min	0					min	0.00334239					min	0
		max	0.611719					max	0.180432					max	0.220484					max	1.17671					max	0.181668					max	0.4					max	0.195376					max	0.253086
[truncated: 63 more columns]

## Sheet: Back
Back SC ECC						Back frac area						BackECC						BackAVG OBJ						BackPeak LEn						Backno. obj.						Backperim div area						Backhue						Backsaturatn
image 1	image 2	image 1 Norm	image 2 Norm	diff		image 1	image 2	image 1 Norm	image 2 Norm	diff		image 1	image 2	image 1 Norm	image 2 Norm	diff		image 1	image 2	image 1 Norm	image 2 Norm	diff		image 1	image 2	image 1 Norm	image 2 Norm	diff		image 1	image 2	image 1 Norm	image 2 Norm	diff		image 1	image 2	image 1 Norm	image 2 Norm	diff		image 1	image 2	image 1 Norm	image 2 Norm	diff		image 1	image 2
0.6627	0.6593	1.00257	0.997428	0.00514372		0.4036	0.3923	1.0142	0.985802	0.0283955		0.9206	0.9217	1.15095	1.15233	0.00137524		125.55	131.178	1.96676	2.05492	0.0881618		5.5114	5.8521	0.970018	1.02998	0.0599639		1	1	1	1	0		0.6592	0.6875	0.978986	1.02101	0.0420287		0.0741	0.0739	1.00135	0.998649	0.0027027		0.5528	0.5514
0.6224	0.5964	1.02133	0.978668	0.0426649		0.3286	0.3527	0.964626	1.03537	0.0707471		0.7313	0.7084	0.914285	0.885655	0.02863		42.3531	26.1907	0.663467	0.410281	0.253186		5.3593	5.2061	1.0145	0.9855	0.0290003		5	8	0.769231	1.23077	0.461538		0.9076	0.8988	1.00487	0.995128	0.00974314		0.0746	0.0706	1.02755	0.972452	0.0550964		0.4284	0.4499
0.6864	0.6968	0.992481	1.00752	0.0150376		0.299	0.3068	0.987124	1.01288	0.0257511		0.8599	0.858	1.07506	1.07269	0.00237542		120.383	144.368	1.88581	2.26155	0.375734		6.2615	7.7678	0.892632	1.10737	0.214736		1	1	1	1	0		0.5067	0.5702	0.941034	1.05897	0.117931		0.0825	0.0825	1	1	0		0.5414	0.5428
0.6533	0.6525	1.00061	0.999387	0.0012253		0.3799	0.3964	0.978745	1.02125	0.0425093		0.7757	0.7826	0.969795	0.978421	0.00862651		23.3837	25.1602	0.366309	0.394138	0.0278291		4.6352	4.878	0.974478	1.02552	0.0510449		15	13	1.07143	0.928571	0.142857		0.9732	0.9822	0.995397	1.0046	0.00920528		0.0706	0.0715	0.993666	1.00633	0.0126671		0.5775	0.584
0.6243	0.6359	0.990795	1.0092	0.0184098		0.294	0.2692	1.04403	0.955966	0.0880682		0.8461	0.7972	1.05781	0.996674	0.0611357		44.8269	42.571	0.702219	0.66688	0.035339		6.6297	6.0579	1.04507	0.954932	0.0901353		6	7	0.923077	1.07692	0.153846		0.8569	0.9362	0.955775	1.04423	0.0884502		0.0864	0.0834	1.01767	0.982332	0.0353357		0.426	0.4193
0.688	0.7024	0.989643	1.01036	0.0207135		0.3957	0.3771	1.02407	0.975932	0.0481366		0.7857	0.7109	0.982297	0.888781	0.0935164		84.5077	103.767	1.32382	1.62552	0.301698		6.0251	6.4507	0.965886	1.03411	0.0682281		2	2	1	1	0		0.6217	0.6896	0.948219	1.05178	0.103561		0.074	0.0743	0.997977	1.00202	0.00404585		0.6073	0.6031
0.5329	0.525	1.00747	0.992532	0.0149352		0.3691	0.388	0.975036	1.02496	0.0499274		0.6819	0.6743	0.852524	0.843023	0.00950166		123.65	116.419	1.937	1.82372	0.113278		5.0768	5.1216	0.995607	1.00439	0.00878569		17	18	0.971429	1.02857	0.0571429		0.7083	0.7061	1.00156	0.998445	0.00311086		0.1052	0.094	1.05622	0.943775	0.11245		0.2871	0.2978
0.7546	0.757	0.998412	1.00159	0.00317544		0.2978	0.2869	1.01864	0.981358	0.0372841		0.8541	0.6849	1.06781	0.856275	0.211537		52.846	114.7	0.827839	1.79679	0.968947		6.5879	6.1696	1.03279	0.967211	0.0655771		2	1	1.33333	0.666667	0.666667		0.8537	0.8941	0.976885	1.02311	0.0462295		0.111	0.114	0.986667	1.01333	0.0266667		0.4777	0.4758
0.7001	0.6827	1.01258	0.987417	0.0251663		0.3005	0.3051	0.992404	1.0076	0.0151915		0.8939	0.9044	1.11757	1.1307	0.0131273		31.5945	36.9293	0.494932	0.578502	0.0835703		5.9138	6.0549	0.988211	1.01179	0.0235782		6	5	1.09091	0.909091	0.181818		0.7371	0.7647	0.981622	1.01838	0.0367559		0.0851	0.0858	0.995904	1.0041	0.00819193		0.588	0.5946
0.7871	0.7857	1.00089	0.99911	0.00178026		0.3309	0.3422	0.983212	1.01679	0.033576		0.8764	0.869	1.09569	1.08644	0.00925162		49.9058	62.5035	0.781781	0.979125	0.197345		5.8241	5.6384	1.0162	0.983799	0.0324013		12	14	0.923077	1.07692	0.153846		0.6954	0.6943	1.00079	0.999208	0.00158308		0.0783	0.0768	1.00967	0.990329	0.0193424		0.3403	0.343
0.6109	0.6037	1.00593	0.994072	0.0118558		0.3244	0.3201	1.00667	0.993328	0.0133437		0.7717	0.7631	0.964794	0.954042	0.0107519		125.279	130.39	1.96251	2.04258	0.0800676		5.7795	5.8321	0.99547	1.00453	0.00905991		2	2	1	1	0		0.5884	0.591	0.997795	1.0022	0.00440902		0.0741	0.0753	0.991968	1.00803	0.0160643		0.6012	0.6007
0.5403	0.5475	0.993381	1.00662	0.0132377		0.3333	0.348	0.978424	1.02158	0.0431528		0.8845	0.8858	1.10582	1.10744	0.00162528		43.0942	43.6714	0.675076	0.684118	0.00904191		7.7967	7.6356	1.01044	0.989561	0.0208783		4	4	1	1	0		0.6691	0.6705	0.998955	1.00105	0.00209018		0.0847	0.0851	0.997644	1.00236	0.00471143		0.5864	0.5823
0.7937	0.7884	1.00335	0.99665	0.00669996		0.3224	0.3451	0.965993	1.03401	0.068015		0.7096	0.7537	0.887155	0.94229	0.0551346		81.7078	75.1029	1.27996	1.1765	0.103467		7.5122	7.2866	1.01524	0.984756	0.030489		3	3	1	1	0		0.5518	0.5687	0.984917	1.01508	0.0301651		0.0775	0.0808	0.979154	1.02085	0.041693		0.3392	0.342
0.7699	0.7835	0.991245	1.00875	0.01751		0.343	0.3398	1.00469	0.995313	0.00937317		0.6964	0.6744	0.870652	0.843148	0.0275048		64.6577	65.1259	1.01287	1.02021	0.00733441		5.4724	5.188	1.02668	0.973322	0.0533563		16	14	1.06667	0.933333	0.133333		0.7616	0.7389	1.01513	0.984872	0.0302566		0.0871	0.0868	1.00173	0.998275	0.00345026		0.6397	0.6396
0.6795	0.6781	1.00103	0.998969	0.00206246		0.3044	0.3065	0.996562	1.00344	0.0068751		0.7339	0.6715	0.917536	0.839522	0.0780137		96.2174	62.0593	1.50726	0.972167	0.535091		7.6193	6.5555	1.07505	0.924951	0.150097		2	3	0.8	1.2	0.4		0.7052	0.6624	1.0313	0.968704	0.0625914		0.0922	0.0922	1	1	0		0.5911	0.5922
0.792	0.794	0.998739	1.00126	0.00252207		0.2887	0.275	1.0243	0.975696	0.0486074		0.7703	0.8105	0.963044	1.0133	0.0502588		16.1694	16.4432	0.253296	0.257585	0.00428911		4.9854	4.9184	1.00677	0.993235	0.0135302		11	11	1	1	0		1.2835	1.3008	0.993306	1.00669	0.0133885		0.0774	0.0799	0.984107	1.01589	0.0317864		0.4887	0.489
0.7334	0.7043	1.02024	0.979759	0.0404813		0.2689	0.2468	1.04285	0.957146	0.0857087		0.8991	0.9099	1.12407	1.13757	0.0135024		13.9478	19.9629	0.218494	0.312721	0.0942273		5.1073	4.8292	1.02799	0.972012	0.0559754		3	2	1.2	0.8	0.4		1.2477	1.2843	0.985545	1.01445	0.02891		0.0728	0.0716	1.00831	0.99169	0.0166205		0.4137	0.4131
0.807	0.8109	0.997589	1.00241	0.00482106		0.288	0.2873	1.00122	0.998783	0.00243351		0.8692	0.8743	1.08669	1.09307	0.00637612		12.9778	11.4294	0.203299	0.179043	0.0242559		4.4073	4.1468	1.03045	0.969547	0.0609065		7	8	0.933333	1.06667	0.133333		1.3785	1.3136	1.02411	0.975892	0.0482151		0.0697	0.0691	1.00432	0.995677	0.00864553		0.4595	0.4574
0.6716	0.6469	1.01873	0.981267	0.0374668		0.2665	0.274	0.986124	1.01388	0.0277521		0.7683	0.7217	0.960543	0.902283	0.0582602		37.4842	31.1312	0.587195	0.487674	0.0995205		6.5615	5.8249	1.05947	0.940532	0.118937		3	3	1	1	0		0.8774	0.7972	1.04789	0.952108	0.0957841		0.0903	0.0917	0.992308	1.00769	0.0153846		0.3934	0.4069
0.5916	0.6132	0.982072	1.01793	0.0358566		0.2926	0.2949	0.996085	1.00391	0.00782979		0.8111	0.7452	1.01405	0.931663	0.0823894		99.7197	41.2628	1.56212	0.646387	0.915735		8.6245	8.8858	0.985077	1.01492	0.0298453		2	5	0.571429	1.42857	0.857143		0.7127	0.7089	1.00267	0.997327	0.00534609		0.0912	0.0888	1.01333	0.986667	0.0266667		0.3608	0.3643
0.7155	0.7073	1.00576	0.994237	0.0115266		0.2775	0.2654	1.02229	0.977712	0.0445754		0.8043	0.7848	1.00555	0.981172	0.0243793		20.5967	22.7766	0.32265	0.356798	0.0341484		4.7979	4.6884	1.01154	0.988457	0.0230859		9	8	1.05882	0.941176	0.117647		1.1944	1.2476	0.978215	1.02179	0.0435708		0.0697	0.067	1.01975	0.980249	0.0395026		0.4506	0.4446
0.7664	0.7669	0.999674	1.00033	0.000652188		0.37	0.3791	0.987852	1.01215	0.0242958		0.8662	0.8605	1.08294	1.07581	0.00712625		92.8953	94.5939	1.45522	1.48183	0.0266088		6.8643	6.9319	0.9951	1.0049	0.0097998		2	2	1	1	0		0.5431	0.5427	1.00037	0.999632	0.000736784		0.0627	0.063	0.997613	1.00239	0.00477327		0.4911	0.4764
0.3109	0.2953	1.02573	0.974266	0.0514682		0.2304	0.235	0.990116	1.00988	0.0197679		0.7491	0.8074	0.936539	1.00943	0.0728878		32.9429	31.5423	0.516055	0.494114	0.0219406		7.5796	7.1531	1.02895	0.971051	0.0578984		4	4	1	1	0		0.8657	0.8325	1.01955	0.98045	0.0391002		0.1038	0.1271	0.899091	1.10091	0.201819		0.4333	0.4452
0.7014	0.6846	1.01212	0.987879	0.0242424		0.3496	0.3443	1.00764	0.992362	0.015276		0.8483	0.8557	1.06056	1.06981	0.00925162		80.1556	79.2748	1.25565	1.24185	0.0137978		5.8367	5.3976	1.03909	0.960914	0.0781713		14	16	0.933333	1.06667	0.133333		0.6622	0.6038	1.04613	0.95387	0.0922591		0.0679	0.067	1.00667	0.993328	0.0133432		0.4218	0.4245
0.5808	0.5777	1.00268	0.997324	0.00535175		0.3531	0.332	1.0308	0.969202	0.0615968		0.7934	0.8207	0.991924	1.02605	0.034131		54.1121	69.9361	0.847673	1.09556	0.247885		5.7133	6.0797	0.968931	1.03107	0.0621386		5	4	1.11111	0.888889	0.222222		0.8456	0.8829	0.978421	1.02158	0.0431588		0.0709	0.0679	1.02161	0.978386	0.0432277		0.4198	0.4205
0.7884	0.7894	0.999366	1.00063	0.00126759		0.4071	0.3949	1.01521	0.984788	0.0304239		0.7323	0.7718	0.915535	0.964919	0.0493836		87.9045	89.6047	1.37703	1.40367	0.0266338		6.2145	5.7659	1.03744	0.962556	0.074889		3	3	1	1	0		0.5998	0.5936	1.0052	0.994805	0.0103905		0.0647	0.0653	0.995385	1.00462	0.00923077		0.5185	0.5162
0.6159	0.6199	0.996763	1.00324	0.00647354		0.2605	0.2628	0.995605	1.0044	0.00879037		0.8477	0.8992	1.05981	1.1242	0.0643863		30.0169	57.0884	0.470218	0.894297	0.424078		7.552	8.1468	0.962112	1.03789	0.0757765		10	9	1.05263	0.947368	0.105263		0.6487	0.7558	0.923745	1.07625	0.15251		0.0686	0.068	1.00439	0.995608	0.00878477		0.5151	0.5228
0.6831	0.6838	0.999488	1.00051	0.00102422		0.2944	0.3039	0.984122	1.01588	0.0317566		0.8448	0.8804	1.05618	1.10069	0.0445078		59.9375	124.251	0.938928	1.94641	1.00748		8.7363	9.9346	0.93582	1.06418	0.12836		2	1	1.33333	0.666667	0.666667		0.4417	0.4803	0.958134	1.04187	0.083731		0.087	0.0828	1.02473	0.975265	0.04947		0.4139	0.4189
0.6749	0.6726	1.00171	0.998293	0.00341373		0.3217	0.3262	0.993054	1.00695	0.013891		0.7267	0.7443	0.908534	0.930538	0.0220039		20.4215	24.809	0.319905	0.388636	0.0687307		5.4789	6.2428	0.93483	1.06517	0.130339		6	6	1	1	0		0.9352	1.0565	0.939097	1.0609	0.121805		0.0641	0.0643	0.998442	1.00156	0.00311526		0.4093	0.4172
0.6205	0.6415	0.98336	1.01664	0.0332805		0.3933	0.3894	1.00498	0.995017	0.0099655		0.6937	0.6625	0.867277	0.82827	0.0390068		66.2424	77.2506	1.0377	1.21014	0.172445		5.5416	5.5971	0.995017	1.00498	0.00996526		2	2	1	1	0		0.5503	0.5639	0.987794	1.01221	0.0244121		0.0573	0.0586	0.988783	1.01122	0.0224331		0.4606	0.472
0.7382	0.7001	1.02649	0.97351	0.0529792		0.2197	0.2186	1.00251	0.99749	0.00501939		0.7899	0.7589	0.987548	0.948791	0.0387568		21.08	27.0003	0.330221	0.422963	0.0927422		7.4755	6.6772	1.05641	0.943594	0.112812		14	11	1.12	0.88	0.24		0.9912	1.0106	0.990309	1.00969	0.0193826		0.0867	0.0828	1.02301	0.976991	0.0460177		0.3611	0.353
0.6603	0.6278	1.02523	0.974769	0.0504619		0.2878	0.3239	0.940984	1.05902	0.118032		0.8543	0.7967	1.06806	0.996049	0.0720126		48.0891	32.6093	0.753322	0.510829	0.242493		5.7859	5.4978	1.02553	0.974468	0.0510648		3	4	0.857143	1.14286	0.285714		1.0178	0.8596	1.08427	0.915735	0.168531		0.076	0.0708	1.03542	0.964578	0.0708447		0.3349	0.3534
0.617	0.6494	0.974416	1.02558	0.0511687		0.2286	0.2325	0.991542	1.00846	0.0169161		0.6955	0.7986	0.869527	0.998425	0.128898		30.6445	45.7407	0.48005	0.716534	0.236484		6.1214	7.2183	0.917772	1.08223	0.164456		3	2	1.2	0.8	0.4		0.8124	0.9013	0.948124	1.05188	0.103752		0.0714	0.069	1.01709	0.982906	0.034188		0.3829	0.3871
0.5546	0.5288	1.02381	0.976186	0.0476278		0.3304	0.3288	1.00243	0.997573	0.00485437		0.7273	0.7695	0.909284	0.962043	0.0527592		73.6571	50.5812	1.15385	0.792361	0.361487		6.5519	6.5336	1.0014	0.998602	0.00279699		8	8	1	1	0		0.7189	0.724	0.996465	1.00353	0.0070691		0.0769	0.0759	1.00654	0.993455	0.013089		0.4293	0.4301
0.7068	0.695	1.00842	0.991582	0.0168355		0.4278	0.4417	0.984014	1.01599	0.0319724		0.8622	0.8622	1.07794	1.07794	0		172.603	185.249	2.70384	2.90195	0.198103		5.9579	6.7549	0.937307	1.06269	0.125385		1	1	1	1	0		0.5983	0.6178	0.983965	1.01603	0.0320697		0.0756	0.0753	1.00199	0.998012	0.00397614		0.4997	0.5033
0.7158	0.7073	1.00597	0.994027	0.0119458		0.3447	0.341	1.0054	0.994604	0.0107919		0.9221	0.9265	1.15283	1.15833	0.00550096		46.4004	32.9665	0.726868	0.516424	0.210444		5.0623	5.2364	0.983095	1.01691	0.0338101		2	3	0.8	1.2	0.4		0.9625	0.9342	1.01492	0.985079	0.0298413		0.0743	0.0732	1.00746	0.992542	0.0149153		0.4374	0.4299
0.7465	0.7209	1.01745	0.982554	0.0348916		0.2792	0.3146	0.940384	1.05962	0.119232		0.831	0.8416	1.03893	1.05218	0.0132523		185.503	212.364	2.90593	3.32671	0.420771		7.1106	9.3622	0.863314	1.13669	0.273372		1	1	1	1	0		0.3733	0.4238	0.936645	1.06335	0.126709		0.0738	0.0749	0.992603	1.0074	0.0147949		0.4683	0.4598
0.7755	0.7894	0.991118	1.00888	0.0177647		0.3038	0.2967	1.01182	0.988177	0.023647		0.9427	0.8853	1.17858	1.10682	0.0717626		44.862	93.3739	0.702769	1.46271	0.759945		6.5293	7.6464	0.921196	1.0788	0.157608		4	2	1.33333	0.666667	0.666667		0.7575	0.8382	0.949427	1.05057	0.101147		0.0743	0.0766	0.984758	1.01524	0.0304838		0.4568	0.4515
0.7965	0.7869	1.00606	0.993937	0.0121258		0.208	0.2069	1.00265	0.997349	0.00530248		0.8562	0.8939	1.07044	1.11757	0.0471332		14.2658	17.4611	0.223476	0.27353	0.0500548		7.0309	7.0248	1.00043	0.999566	0.000867975		6	5	1.09091	0.909091	0.181818		1.1888	1.2945	0.957436	1.04256	0.0851287		0.0797	0.0733	1.04183	0.95817	0.0836601		0.3218	0.3203
0.7368	0.7465	0.993461	1.00654	0.0130789		0.3629	0.3715	0.98829	1.01171	0.0234205		0.9194	0.9203	1.14945	1.15058	0.0011252		89.0163	88.8005	1.39445	1.39107	0.00338053		4.6033	4.6059	0.999718	1.00028	0.000564653		1	1	1	1	0		0.9388	0.9321	1.00358	0.996419	0.00716233		0.0769	0.0771	0.998701	1.0013	0.0025974		0.3802	0.3803
0.6167	0.6385	0.982632	1.01737	0.0347355		0.2859	0.326	0.934466	1.06553	0.131067		0.6962	0.8175	0.870402	1.02205	0.151652		37.1694	32.1544	0.582263	0.503703	0.0785606		5.0862	5.1929	0.98962	1.01038	0.0207606		8	6	1.14286	0.857143	0.285714		1.0087	0.9609	1.02427	0.975731	0.0485378		0.0836	0.0882	0.973225	1.02678	0.0535506		0.268	0.2665
0.581	0.571	1.00868	0.991319	0.0173611		0.2894	0.2977	0.985863	1.01414	0.0282746		0.6555	0.5557	0.819518	0.694747	0.124772		56.8144	31.2014	0.890005	0.488774	0.401231		4.4421	4.6996	0.971832	1.02817	0.0563353		1	2	0.666667	1.33333	0.666667		1.2688	1.2408	1.01116	0.988843	0.0223143		0.0741	0.0748	0.995299	1.0047	0.00940228		0.391	0.3949
0.6263	0.6176	1.00699	0.993006	0.0139883		0.2965	0.2966	0.999831	1.00017	0.000337211		0.8244	0.8205	1.03068	1.0258	0.00487585		34.6156	35.1754	0.542258	0.551027	0.00876934		8.5945	8.7307	0.992139	1.00786	0.0157228		5	5	1	1	0		0.757	0.76	0.998022	1.00198	0.00395517		0.0949	0.0964	0.992159	1.00784	0.0156822		0.4916	0.457
0.7001	0.7042	0.99708	1.00292	0.00583921		0.4039	0.428	0.97103	1.02897	0.0579397		0.8063	0.8696	1.00805	1.08719	0.0791388		74.5856	46.7752	1.16839	0.732739	0.435653		4.8547	4.841	1.00141	0.998587	0.002826		4	6	0.8	1.2	0.4		0.7105	0.7019	1.00609	0.993911	0.0121779		0.0925	0.0883	1.02323	0.97677	0.0464602		0.2677	0.2774
0.7243	0.7236	1.00048	0.999517	0.000966918		0.2643	0.255	1.01791	0.982091	0.0358174		0.7675	0.7742	0.959543	0.967919	0.00837647		37.7905	46.2517	0.591993	0.724539	0.132546		8.0068	8.5265	0.968566	1.03143	0.0628671		5	5	1	1	0		0.6388	0.6996	0.954573	1.04543	0.0908548		0.081	0.0826	0.99022	1.00978	0.0195599		0.5596	0.5567
0.7473	0.7399	1.00498	0.995024	0.00995159		0.283	0.2737	1.01671	0.983294	0.0334112		0.883	0.9014	1.10394	1.12695	0.023004		41.8005	44.5547	0.65481	0.697955	0.0431449		7.0684	7.2982	0.984005	1.016	0.0319909		4	4	1	1	0		0.724	0.7623	0.974231	1.02577	0.0515374		0.0791	0.079	1.00063	0.999367	0.00126502		0.3874	0.3818
0.6945	0.6866	1.00572	0.99428	0.0114402		0.302	0.2994	1.00432	0.995677	0.00864649		0.7446	0.7381	0.930913	0.922786	0.00812642		30.4779	31.2457	0.47744	0.489468	0.0120277		6.0996	6.1656	0.994619	1.00538	0.0107622		6	6	1	1	0		0.7606	0.7599	1.00046	0.99954	0.00092075		0.1364	0.1372	0.997076	1.00292	0.00584795		0.3715	0.3689
0.6508	0.6593	0.993512	1.00649	0.0129761		0.2432	0.2327	1.02206	0.977937	0.0441269		0.7905	0.7956	0.988298	0.994674	0.00637612		80.5837	84.3079	1.26235	1.32069	0.0583401		6.1225	5.5773	1.0466	0.953401	0.0931982		1	1	1	1	0		0.7354	0.7625	0.981908	1.01809	0.036184		0.0534	0.0506	1.02692	0.973077	0.0538462		0.6012	0.6007
0.7506	0.8673	0.927869	1.07213	0.144261		0.2239	0.2736	0.900101	1.0999	0.199799		0.7558	0.8467	0.944915	1.05856	0.113645		17.7166	27.0176	0.277533	0.423234	0.145701		4.6895	8.3787	0.717696	1.2823	0.564607		7	2	1.55556	0.444444	1.11111		0.8948	1.0343	0.927686	1.07231	0.144627		0.1762	0.172	1.01206	0.987938	0.0241241		0.1307	0.13
0.6226	0.6403	0.985985	1.01402	0.0280307		0.3681	0.3703	0.997021	1.00298	0.00595883		0.6073	0.6221	0.759258	0.777761	0.0185032		56.3976	55.7148	0.883475	0.872779	0.0106961		6.0448	6.3137	0.978242	1.02176	0.0435166		3	3	1	1	0		0.7085	0.7156	0.995014	1.00499	0.00997121		0.0816	0.0758	1.03685	0.963151	0.0736976		0.3842	0.3969
0.6769	0.6714	1.00408	0.995921	0.00815842		0.3524	0.3495	1.00413	0.995868	0.00826329		0.8894	0.797	1.11194	0.996424	0.11552		130.199	130.831	2.03958	2.04948	0.00989879		7.2515	8.1268	0.943082	1.05692	0.113836		2	2	1	1	0		0.3584	0.3639	0.992385	1.00761	0.0152291		0.0939	0.0955	0.991552	1.00845	0.0168955		0.4411	0.4434
0.7092	0.6957	1.00961	0.990391	0.0192184		0.3372	0.3269	1.01551	0.98449	0.0310194		0.8717	0.8773	1.08982	1.09682	0.00700123		17.664	18.8835	0.276709	0.295812	0.0191036		4.2323	4.2949	0.992659	1.00734	0.0146824		4	4	1	1	0		1.1704	1.2646	0.961314	1.03869	0.0773717		0.1549	0.1604	0.982556	1.01744	0.0348874		0.2082	0.2052
0.7275	0.7417	0.990335	1.00967	0.0193302		0.2843	0.279	1.00941	0.990591	0.0188177		0.8866	0.8889	1.10844	1.11132	0.0028755		114.675	120.092	1.7964	1.88125	0.0848501		9.5121	9.2097	1.01615	0.983848	0.0323046		5	5	1	1	0		0.3856	0.3931	0.990369	1.00963	0.0192629		0.0857	0.0882	0.985624	1.01438	0.0287522		0.5295	0.5236
0.5827	0.5974	0.987543	1.01246	0.0249131		0.2261	0.2204	1.01277	0.987234	0.0255319		0.6543	0.7889	0.818018	0.986298	0.168279		48.3467	58.462	0.757357	0.915814	0.158457		11.8599	10.2008	1.07521	0.924794	0.150412		7	6	1.07692	0.923077	0.153846		0.446	0.4348	1.01272	0.987284	0.0254314		0.0909	0.0931	0.988043	1.01196	0.023913		0.6545	0.6492
0.6413	0.6178	1.01866	0.981336	0.0373283		0.3462	0.3352	1.01614	0.983857	0.0322865		0.6828	0.6661	0.853649	0.832771	0.0208787		80.2465	80.975	1.25707	1.26848	0.011412		6.2671	6.7142	0.965558	1.03444	0.0688837		2	2	1	1	0		0.6775	0.6944	0.987681	1.01232	0.0246374		0.0707	0.07	1.00498	0.995025	0.00995025		0.5367	0.5376
			CV Sc ECC						CV Frac AREA						CV ECC						CV AVG OBJ						CV Peak Len						CV no. obj.						CV prim div area						CV hue
			0.0210336						0.0369728						0.0449851						0.191785						0.0734981						0.177785						0.048277						0.0285386
		smith	0.0194054					smith	0.0356252					smith	0.0442432					smith	0.219217					smith	0.0663374					smith	0.18868					smith	0.0499309					smith	0.0286145
		field	0.0268679					field	0.0418015					field	0.0476438					field	0.0934859					field	0.0991572					field	0.138746					field	0.0423505					field	0.0282666
		min	0.000652188					min	0.000337211					min	0					min	0.00338053					min	0.000564653					min	0					min	0.000736784					min	0
		max	0.144261					max	0.199799					max	0.211537					max	1.00748					max	0.564607					max	1.11111					max	0.168531					max	0.201819
[truncated: 63 more columns]

## Sheet: Left 
LeftSC ECC						Leftfrac area						LeftECC						LeftAVG OBJ						LeftPeak LEn						Leftno. obj.						Leftperim div area						Lefthue						Leftsaturatn
image 1	image 2	image 1 Norm	image 2 Norm	diff		image 1	image 2	image 1 Norm	image 2 Norm	diff		image 1	image 2	image 1 Norm	image 2 Norm	diff		image 1	image 2	image 1 Norm	image 2 Norm	diff		image 1	image 2	image 1 Norm	image 2 Norm	diff		image 1	image 2	image 1 Norm	image 2 Norm	diff		image 1	image 2	image 1 Norm	image 2 Norm	diff		image 1	image 2	image 1 Norm	image 2 Norm	diff		image 1	image 2
0.7072	0.7018	1.00383	0.996167	0.00766501		0.3703	0.3751	0.993561	1.00644	0.012879		0.8126	0.8293	0.988784	1.00911	0.0203208		52.1971	52.8967	1.24423	1.26091	0.0166765		4.6744	4.9112	0.975296	1.0247	0.0494074		3	3	1	1	0		0.8341	0.8264	1.00464	0.995363	0.00927431		0.0757	0.076	0.998022	1.00198	0.00395517		0.5018	0.5021
0.6487	0.6452	1.00271	0.997295	0.00541		0.3902	0.3896	1.00077	0.999231	0.00153886		0.8064	0.7968	0.98124	0.969559	0.0116814		32.6952	29.2651	0.779361	0.697598	0.0817639		4.5897	4.4321	1.01747	0.982531	0.0349376		14	14	1	1	0		1.1392	1.0931	1.02065	0.979349	0.0413027		0.086	0.0881	0.987938	1.01206	0.0241241		0.3763	0.3718
0.7248	0.7353	0.992809	1.00719	0.0143826		0.4598	0.4553	1.00492	0.995083	0.00983499		0.8586	0.8372	1.04476	1.01872	0.0260399		291.386	145.132	6.94581	3.45953	3.48628		7.5381	7.2116	1.02214	0.977864	0.0442721		2	2	1	1	0		0.5646	0.5738	0.991918	1.00808	0.016163		0.0814	0.0832	0.989064	1.01094	0.0218712		0.4718	0.4715
0.6755	0.6743	1.00089	0.999111	0.00177804		0.4059	0.3996	1.00782	0.992179	0.0156425		0.7133	0.7131	0.867954	0.867711	0.000243363		23.085	22.5901	0.550281	0.538484	0.011797		4.7875	4.9112	0.987246	1.01275	0.0255086		32	31	1.01587	0.984127	0.031746		0.9028	0.9222	0.98937	1.01063	0.0212603		0.07	0.0695	1.00358	0.996416	0.00716846		0.6108	0.6039
0.6684	0.6425	1.01976	0.980243	0.0395148		0.3814	0.4044	0.97073	1.02927	0.0585391		0.8382	0.8501	1.01993	1.03441	0.0144801		39.1498	27.7966	0.933221	0.662593	0.270628		4.0469	4.1997	0.981471	1.01853	0.0370577		16	21	0.864865	1.13514	0.27027		1.0715	1.08	0.996049	1.00395	0.00790146		0.0805	0.0807	0.998759	1.00124	0.00248139		0.5167	0.5191
0.6367	0.6465	0.992363	1.00764	0.0152743		0.2106	0.2219	0.973873	1.02613	0.0522543		0.8641	0.8624	1.05145	1.04938	0.00206859		15.3619	15.3242	0.366184	0.365286	0.000898662		5.3479	5.5112	0.984962	1.01504	0.0300762		16	15	1.03226	0.967742	0.0645161		1.0597	1.1041	0.979481	1.02052	0.0410389		0.08	0.0814	0.991326	1.00867	0.0173482		0.6049	0.6107
0.6886	0.687	1.00116	0.998837	0.00232626		0.3264	0.3218	1.0071	0.992903	0.0141932		0.8312	0.8289	1.01142	1.00862	0.00279868		24.8166	24.5417	0.591558	0.585005	0.00655284		5.1376	5.2734	0.986956	1.01304	0.0260878		17	18	0.971429	1.02857	0.0571429		0.9862	1.0082	0.988969	1.01103	0.0220618		0.0667	0.0678	0.991822	1.00818	0.0163569		0.554	0.5592
0.717	0.7019	1.01064	0.989358	0.0212841		0.3455	0.3501	0.993387	1.00661	0.013226		0.8692	0.8708	1.05766	1.0596	0.0019469		16.8436	18.4997	0.401504	0.440981	0.0394768		4.348	4.4283	0.99085	1.00915	0.0182993		22	21	1.02326	0.976744	0.0465116		1.109	1.1103	0.999414	1.00059	0.00117154		0.1176	0.1159	1.00728	0.992719	0.014561		0.5714	0.5686
0.7105	0.6865	1.01718	0.98282	0.0343593		0.3367	0.3355	1.00179	0.998215	0.00357037		0.7882	0.7912	0.959094	0.962744	0.00365045		39.6091	33.981	0.944169	0.810011	0.134158		6.4412	5.9712	1.03787	0.962135	0.0757307		11	11	1	1	0		0.8086	0.7462	1.04013	0.959866	0.0802676		0.0889	0.0892	0.998316	1.00168	0.00336889		0.6341	0.63
0.5786	0.5889	0.991178	1.00882	0.0176445		0.369	0.3726	0.995146	1.00485	0.00970874		0.8164	0.8293	0.993408	1.00911	0.0156969		47.9889	39.2679	1.14392	0.936036	0.207884		6.0427	6.0717	0.997606	1.00239	0.00478769		7	7	1	1	0		0.8215	0.7934	1.0174	0.9826	0.0348009		0.0769	0.0787	0.988432	1.01157	0.0231362		0.4646	0.4659
0.5796	0.5926	0.98891	1.01109	0.0221805		0.3083	0.3056	1.0044	0.995602	0.00879622		0.8704	0.8782	1.05912	1.06861	0.00949116		69.8574	88.3231	1.6652	2.10537	0.44017		6.1182	6.056	1.00511	0.994891	0.0102183		5	4	1.11111	0.888889	0.222222		0.6414	0.7498	0.922082	1.07792	0.155837		0.0965	0.0982	0.991269	1.00873	0.0174628		0.6357	0.6334
0.7014	0.7043	0.997937	1.00206	0.00412606		0.3637	0.3697	0.991819	1.00818	0.0163621		0.8332	0.8469	1.01385	1.03052	0.0166704		31.26	30.9599	0.74515	0.737997	0.00715354		5.3497	5.3843	0.996777	1.00322	0.0064468		13	13	1	1	0		0.9863	0.9718	1.00741	0.992595	0.0148103		0.0928	0.0939	0.994108	1.00589	0.0117836		0.5374	0.5397
0.6962	0.7051	0.993649	1.00635	0.0127025		0.3052	0.2767	1.04898	0.951023	0.097955		0.8159	0.8026	0.9928	0.976616	0.0161836		16.1813	17.745	0.385717	0.422991	0.0372742		4.7673	4.5832	1.01969	0.980311	0.0393776		8	8	1	1	0		1.1094	1.1459	0.983816	1.01618	0.0323682		0.0761	0.0711	1.03397	0.966033	0.0679348		0.3937	0.3966
0.6912	0.6722	1.01394	0.986064	0.0278715		0.2798	0.2944	0.974573	1.02543	0.0508534		0.7746	0.7591	0.942545	0.923685	0.0188606		20.0066	21.2709	0.476901	0.507038	0.0301373		5.616	6.0172	0.965512	1.03449	0.068975		16	14	1.06667	0.933333	0.133333		0.8338	0.8515	0.989497	1.0105	0.0210052		0.0917	0.0923	0.996739	1.00326	0.00652174		0.6485	0.6502
0.7229	0.7206	1.00159	0.998407	0.0031867		0.3218	0.3267	0.992444	1.00756	0.0151118		0.8056	0.805	0.980267	0.979536	0.000730089		21.9737	22.5115	0.523791	0.536611	0.0128196		5.4893	5.5262	0.99665	1.00335	0.00669965		21	20	1.02439	0.97561	0.0487805		0.9263	0.9338	0.995968	1.00403	0.00806408		0.0863	0.0866	0.998265	1.00174	0.00347021		0.6393	0.6384
0.6982	0.6873	1.00787	0.992133	0.0157344		0.362	0.3759	0.981163	1.01884	0.0376745		0.7851	0.7667	0.955322	0.932932	0.0223894		23.1788	20.3064	0.552517	0.484047	0.0684699		5.2323	5.3097	0.992658	1.00734	0.0146841		17	19	0.944444	1.05556	0.111111		0.9917	0.9686	1.01178	0.988216	0.0235678		0.0795	0.0785	1.00633	0.993671	0.0126582		0.5399	0.536
0.7238	0.7229	1.00062	0.999378	0.00124421		0.3907	0.3781	1.01639	0.983611	0.0327784		0.8407	0.8076	1.02298	0.9827	0.0402766		64.2863	102.124	1.5324	2.43435	0.901944		4.5763	4.8841	0.967464	1.03254	0.0650712		5	4	1.11111	0.888889	0.222222		0.7938	1.0117	0.879313	1.12069	0.241374		0.0786	0.0746	1.02611	0.97389	0.0522193		0.4664	0.4675
0.6777	0.6805	0.997938	1.00206	0.0041231		0.2897	0.3091	0.967602	1.0324	0.0647963		0.7684	0.7808	0.935001	0.95009	0.0150885		16.9781	16.004	0.40471	0.38149	0.0232198		4.8396	4.7157	1.01297	0.987033	0.0259333		10	10	1	1	0		1.109	1.0492	1.02771	0.972292	0.0554166		0.0756	0.0761	0.996704	1.0033	0.00659196		0.462	0.4596
0.4601	0.4596	1.00054	0.999456	0.00108731		0.329	0.3284	1.00091	0.999087	0.00182537		0.9146	0.8776	1.1129	1.06788	0.0450222		30.401	55.1341	0.724674	1.31424	0.589567		4.7314	4.8256	0.990143	1.00986	0.0197133		7	4	1.27273	0.727273	0.545455		1.1358	1.1645	0.987523	1.01248	0.0249533		0.1004	0.1015	0.994552	1.00545	0.0108965		0.462	0.4601
0.4663	0.4892	0.976033	1.02397	0.047933		0.2546	0.2658	0.978478	1.02152	0.0430438		0.8041	0.8184	0.978441	0.995842	0.0174005		25.3162	30.0542	0.603467	0.716407	0.112941		6.8529	7.4392	0.958977	1.04102	0.0820453		8	7	1.06667	0.933333	0.133333		0.7981	0.814	0.990137	1.00986	0.0197258		0.0921	0.0935	0.992457	1.00754	0.0150862		0.4282	0.4332
0.6238	0.5991	1.0202	0.979802	0.0403958		0.3022	0.3344	0.949419	1.05058	0.101162		0.8256	0.8256	1.0046	1.0046	0		26.3542	20.1891	0.62821	0.481251	0.146959		4.2387	4.49	0.97121	1.02879	0.0575802		16	18	0.941176	1.05882	0.117647		1.2064	1.1295	1.03292	0.967079	0.0658419		0.0645	0.0657	0.990783	1.00922	0.0184332		0.4696	0.4714
0.6398	0.671	0.976198	1.0238	0.0476045		0.3444	0.3373	1.01042	0.989585	0.0208303		0.7883	0.782	0.959216	0.95155	0.00766594		26.9177	30.2649	0.641642	0.72143	0.0797878		4.5574	4.7364	0.98074	1.01926	0.0385203		13	12	1.04	0.96	0.08		1.0132	1.0768	0.969569	1.03043	0.0608612		0.0666	0.0606	1.04717	0.95283	0.0943396		0.4262	0.4562
0.4176	0.3325	1.11345	0.886548	0.226903		0.2695	0.251	1.03554	0.964457	0.0710855		0.8609	0.8537	1.04756	1.0388	0.00876107		27.0991	23.3261	0.645966	0.556028	0.0899377		6.5983	6.1459	1.0355	0.964501	0.070997		13	15	0.928571	1.07143	0.142857		0.9955	0.8956	1.05283	0.947174	0.105653		0.082	0.0685	1.0897	0.910299	0.179402		0.3363	0.3394
0.4878	0.5389	0.950229	1.04977	0.0995422		0.2842	0.2819	1.00406	0.995937	0.00812577		0.8687	0.8661	1.05705	1.05388	0.00316372		34.6633	29.8211	0.826275	0.710851	0.115424		5.6104	5.5624	1.0043	0.995704	0.0085923		14	16	0.933333	1.06667	0.133333		0.9349	0.9533	0.990255	1.00974	0.0194895		0.0682	0.072	0.972896	1.0271	0.0542083		0.3853	0.3868
0.5927	0.5902	1.00211	0.997887	0.0042269		0.294	0.2865	1.01292	0.98708	0.0258398		0.8843	0.8749	1.07603	1.06459	0.0114381		26.6378	30.6404	0.63497	0.730381	0.0954107		5.6667	5.4915	1.0157	0.984299	0.0314029		14	12	1.07692	0.923077	0.153846		1.0674	1.0558	1.00546	0.994537	0.0109269		0.0733	0.0706	1.01876	0.981237	0.0375261		0.4294	0.432
0.9012	0.8977	1.00195	0.998054	0.00389127		0.395	0.4052	0.987253	1.01275	0.0254936		0.8612	0.8725	1.04792	1.06167	0.01375		63.1155	64.1953	1.5045	1.53024	0.0257394		5.2943	5.3739	0.992539	1.00746	0.0149229		5	5	1	1	0		0.8423	0.8459	0.997868	1.00213	0.0042649		0.0676	0.0709	0.976173	1.02383	0.0476534		0.479	0.4637
0.6201	0.5902	1.0247	0.975295	0.0494092		0.3435	0.3464	0.995796	1.0042	0.00840702		0.8232	0.8117	1.00168	0.987689	0.0139934		38.4359	43.4553	0.916204	1.03585	0.119648		5.8979	5.8273	1.00602	0.993979	0.0120424		7	7	1	1	0		0.764	0.7471	1.01118	0.988816	0.0223678		0.0728	0.0733	0.996578	1.00342	0.00684463		0.4976	0.4992
0.7085	0.6939	1.01041	0.989589	0.0208214		0.2993	0.3033	0.993362	1.00664	0.0132758		0.914	0.9144	1.11217	1.11266	0.000486726		71.0005	70.9084	1.69245	1.69026	0.0021954		6.3947	6.4196	0.998057	1.00194	0.00388628		4	4	1	1	0		0.8317	0.8308	1.00054	0.999459	0.00108271		0.0913	0.093	0.990776	1.00922	0.0184482		0.4924	0.4922
0.6906	0.702	0.991814	1.00819	0.0163723		0.2761	0.2766	0.999095	1.0009	0.0018093		0.821	0.8216	0.999006	0.999736	0.000730089		20.0876	20.7959	0.478832	0.495716	0.0168839		5.9257	6.0819	0.986992	1.01301	0.0260169		11	11	1	1	0		1.0117	1.0434	0.984575	1.01543	0.0308501		0.0788	0.0834	0.97164	1.02836	0.0567201		0.3615	0.3559
0.4096	0.44	0.964218	1.03578	0.0715631		0.3801	0.3873	0.990618	1.00938	0.0187647		0.8161	0.828	0.993043	1.00752	0.0144801		23.7541	23.7915	0.566231	0.567122	0.000891511		4.1461	4.1469	0.999904	1.0001	0.000192934		10	11	0.952381	1.04762	0.0952381		1.0323	1.0198	1.00609	0.993909	0.0121826		0.0665	0.0659	1.00453	0.995468	0.00906344		0.4601	0.4482
0.6708	0.7006	0.97827	1.02173	0.0434592		0.1777	0.2123	0.911282	1.08872	0.177436		0.8302	0.8408	1.0102	1.0231	0.0128982		15.8422	16.5548	0.377633	0.39462	0.0169864		6.1946	6.7543	0.956776	1.04322	0.0864475		14	11	1.12	0.88	0.24		1.1293	1.1358	0.99713	1.00287	0.00573926		0.087	0.0813	1.03387	0.966132	0.0677362		0.267	0.2832
0.7052	0.7044	1.00057	0.999432	0.00113507		0.2667	0.2762	0.982501	1.0175	0.0349972		0.86	0.8564	1.04646	1.04208	0.00438054		94.1778	57.1784	2.24493	1.36297	0.881961		6.7686	6.3677	1.03052	0.969482	0.061037		3	5	0.75	1.25	0.5		0.8062	0.8209	0.990966	1.00903	0.018069		0.0777	0.0776	1.00064	0.999356	0.00128783		0.3253	0.3216
0.3924	0.4373	0.945884	1.05412	0.108232		0.2867	0.2858	1.00157	0.998428	0.0031441		0.8869	0.8857	1.07919	1.07773	0.00146018		48.0009	48.894	1.14421	1.1655	0.021289		6.332	6.2484	1.00665	0.993355	0.0132905		5	5	1	1	0		0.9273	0.9312	0.997902	1.0021	0.00419693		0.0728	0.0726	1.00138	0.998624	0.00275103		0.4462	0.4448
0.6509	0.6361	1.0115	0.9885	0.0229992		0.287	0.2828	1.00737	0.992629	0.014742		0.7946	0.7946	0.966882	0.966882	0		35.0215	35.5315	0.834814	0.846971	0.012157		5.7441	5.8712	0.989058	1.01094	0.0218849		8	8	1	1	0		0.9641	0.9742	0.994789	1.00521	0.0104215		0.0757	0.0759	0.998681	1.00132	0.00263852		0.4052	0.4038
0.6371	0.6306	1.00513	0.994873	0.0102548		0.359	0.3579	1.00153	0.998466	0.00306877		0.7831	0.7939	0.952888	0.96603	0.0131416		65.7377	82.7873	1.567	1.97342	0.406414		5.3568	5.4266	0.993527	1.00647	0.0129458		6	5	1.09091	0.909091	0.181818		0.8	0.8087	0.994592	1.00541	0.0108162		0.0735	0.0738	0.997963	1.00204	0.00407332		0.4804	0.481
0.6451	0.6531	0.993838	1.00616	0.0123248		0.2983	0.2942	1.00692	0.99308	0.0138397		0.8238	0.8249	1.00241	1.00375	0.0013385		19.0463	23.3058	0.45401	0.555545	0.101534		4.7605	4.7819	0.997757	1.00224	0.00448524		12	10	1.09091	0.909091	0.181818		1.1059	1.1185	0.994336	1.00566	0.0113289		0.0739	0.0735	1.00271	0.997286	0.00542741		0.4889	0.4924
0.6834	0.6598	1.01757	0.98243	0.03514		0.2881	0.2868	1.00226	0.997739	0.00452253		0.8289	0.8661	1.00862	1.05388	0.0452655		67.9898	46.3968	1.62069	1.10597	0.514716		5.6824	5.7081	0.997744	1.00226	0.00451253		7	6	1.07692	0.923077	0.153846		0.6431	0.7589	0.917404	1.0826	0.165193		0.0694	0.0684	1.00726	0.992743	0.0145138		0.4274	0.4281
0.6846	0.6931	0.99383	1.00617	0.0123394		0.2868	0.2954	0.985228	1.01477	0.0295431		0.7156	0.6919	0.870753	0.841915	0.0288385		62.5135	61.3516	1.49015	1.46245	0.0276964		6.0297	5.9486	1.00677	0.993229	0.0135412		5	5	1	1	0		0.9513	0.9391	1.00645	0.993546	0.0129073		0.0793	0.0781	1.00762	0.992376	0.0152478		0.4833	0.4804
0.698	0.7094	0.9919	1.0081	0.0162001		0.2467	0.2525	0.988381	1.01162	0.0232372		0.8815	0.887	1.07262	1.07932	0.00669249		26.7253	25.6518	0.637056	0.611467	0.0255892		4.9587	4.8518	1.0109	0.989104	0.021793		7	7	1	1	0		1.2687	1.2421	1.01059	0.989406	0.0211885		0.0795	0.0822	0.983302	1.0167	0.0333952		0.4116	0.4116
0.722	0.7247	0.998134	1.00187	0.00373263		0.4005	0.408	0.990724	1.00928	0.0185529		0.7503	0.8088	0.912977	0.98416	0.0711837		147.439	71.4652	3.51454	1.70353	1.81101		6.3038	5.7835	1.04305	0.956955	0.0860904		1	2	0.666667	1.33333	0.666667		0.655	0.6309	1.01874	0.981258	0.0374835		0.0789	0.0777	1.00766	0.992337	0.0153257		0.456	0.4565
0.6475	0.6494	0.998535	1.00147	0.00293006		0.2266	0.2277	0.997579	1.00242	0.00484262		0.8463	0.8184	1.02979	0.995842	0.0339492		13.1184	17.7678	0.312706	0.423534	0.110829		5.414	5.7264	0.971958	1.02804	0.0560842		8	6	1.14286	0.857143	0.285714		1.3429	1.3027	1.0152	0.984805	0.0303901		0.0815	0.0929	0.934633	1.06537	0.130734		0.2876	0.2831
0.7059	0.7137	0.994505	1.00549	0.010989		0.2867	0.2718	1.02668	0.973321	0.0533572		0.7032	0.8411	0.855665	1.02346	0.167799		24.4566	23.3326	0.582976	0.556183	0.026793		6.2355	6.1999	1.00286	0.997137	0.00572559		5	5	1	1	0		0.8477	0.7854	1.03815	0.961852	0.0762966		0.0847	0.0797	1.03041	0.969586	0.0608273		0.4366	0.433
0.573	0.5502	1.0203	0.979701	0.0405983		0.3121	0.3109	1.00193	0.998074	0.00385233		0.8959	0.9013	1.09015	1.09672	0.0065708		29.653	33.1678	0.706844	0.790627	0.0837829		5.1934	5.0049	1.01848	0.981517	0.0369669		10	9	1.05263	0.947368	0.105263		1.1601	1.1197	1.01772	0.982279	0.0354417		0.0949	0.0986	0.980879	1.01912	0.0382429		0.4053	0.4035
0.7971	0.793	1.00258	0.997422	0.00515691		0.3935	0.3979	0.99444	1.00556	0.0111195		0.7901	0.8234	0.961406	1.00193	0.04052		43.5414	74.1058	1.0379	1.76647	0.728569		5.9237	6.7075	0.937947	1.06205	0.124105		7	6	1.07692	0.923077	0.153846		0.6342	0.7615	0.908791	1.09121	0.182417		0.141	0.1405	1.00178	0.998224	0.0035524		0.2218	0.2172
0.7814	0.7777	1.00237	0.997627	0.00474633		0.2217	0.2213	1.0009	0.999097	0.00180587		0.8269	0.8451	1.00618	1.02833	0.022146		27.0583	26.5428	0.644994	0.632706	0.0122881		6.6615	6.6645	0.999775	1.00023	0.000450248		15	19	0.882353	1.11765	0.235294		0.947	0.9851	0.980281	1.01972	0.039439		0.0903	0.0909	0.996689	1.00331	0.00662252		0.4658	0.4635
0.6942	0.6852	1.00652	0.993475	0.0130492		0.2793	0.262	1.03196	0.96804	0.0639202		0.7814	0.782	0.95082	0.95155	0.000730089		17.0923	23.0103	0.407432	0.548501	0.141068		5.9375	6.2947	0.970798	1.0292	0.0584032		21	19	1.05	0.95	0.1		0.9146	1.0096	0.950629	1.04937	0.0987423		0.0819	0.0836	0.989728	1.01027	0.0205438		0.3908	0.3833
0.6471	0.6391	1.00622	0.99378	0.0124397		0.3512	0.3593	0.9886	1.0114	0.0228008		0.8182	0.7975	0.995598	0.97041	0.0251881		26.6517	26.4008	0.635301	0.629321	0.00598075		5.9628	5.9226	1.00338	0.996618	0.0067646		13	13	1	1	0		0.9066	0.8883	1.0102	0.989804	0.0203911		0.1737	0.1687	1.0146	0.985397	0.0292056		0.2602	0.2702
0.7303	0.752	0.985361	1.01464	0.0292788		0.2999	0.2986	1.00217	0.997828	0.00434419		0.7508	0.7427	0.913585	0.903729	0.00985621		57.107	91.2696	1.36127	2.17561	0.81434		7.5107	7.4251	1.00573	0.994269	0.0114624		4	3	1.14286	0.857143	0.285714		0.5703	0.5952	0.978636	1.02136	0.0427284		0.0723	0.0715	1.00556	0.994437	0.0111266		0.5455	0.5518
0.7726	0.7698	1.00182	0.998185	0.00363071		0.3191	0.3181	1.00157	0.998431	0.00313873		0.788	0.8305	0.958851	1.01057	0.0517147		54.2506	59.4073	1.29318	1.4161	0.122921		5.5439	5.5988	0.995073	1.00493	0.00985399		7	7	1	1	0		0.6533	0.6863	0.975366	1.02463	0.0492684		0.1822	0.1833	0.99699	1.00301	0.00601915		0.1792	0.1737
0.7805	0.7674	1.00846	0.991537	0.0169262		0.3541	0.3514	1.00383	0.996173	0.00765415		0.8367	0.7942	1.01811	0.966395	0.0517147		21.3122	21.1577	0.508023	0.50434	0.00368284		5.1835	5.0796	1.01012	0.989876	0.0202473		17	17	1	1	0		0.9873	0.9775	1.00499	0.995012	0.00997557		0.0944	0.0903	1.0222	0.977802	0.0443963		0.3418	0.3504
0.7851	0.7845	1.00038	0.999618	0.000764526		0.4144	0.4128	1.00193	0.998066	0.00386847		0.9473	0.9405	1.15269	1.14441	0.00827435		58.7041	58.9427	1.39934	1.40503	0.00568755		5.0617	5.2571	0.981064	1.01894	0.0378726		8	8	1	1	0		0.8399	0.8564	0.990273	1.00973	0.0194541		0.1072	0.1095	0.989386	1.01061	0.0212275		0.3397	0.339
0.6924	0.6924	1	1	0		0.3726	0.3719	1.00094	0.99906	0.00188046		0.7789	0.7911	0.947778	0.962623	0.0148451		31.5467	33.3925	0.751984	0.795983	0.0439987		3.6729	3.7118	0.994732	1.00527	0.0105353		6	6	1	1	0		1.1404	1.1764	0.984461	1.01554	0.0310773		0.0798	0.0803	0.996877	1.00312	0.0062461		0.3596	0.3572
0.7251	0.7234	1.00117	0.998826	0.00234726		0.3118	0.3162	0.992994	1.00701	0.0140127		0.8287	0.8103	1.00838	0.985986	0.0223894		43.788	49.9143	1.04378	1.18982	0.146034		7.168	7.4405	0.981346	1.01865	0.037307		21	19	1.05	0.95	0.1		0.7053	0.7228	0.987746	1.01225	0.0245081		0.0974	0.0979	0.99744	1.00256	0.00512033		0.4918	0.498
0.7256	0.7182	1.00513	0.994875	0.0102507		0.2372	0.231	1.01324	0.986758	0.0264844		0.7492	0.7911	0.911638	0.962623	0.0509846		21.7655	21.7842	0.518828	0.519274	0.000445755		7.6579	7.5631	1.00623	0.993772	0.0124565		21	23	0.954545	1.04545	0.0909091		0.7746	0.7705	1.00265	0.997346	0.0053071		0.103	0.1092	0.970782	1.02922	0.0584354		0.5766	0.5625
0.6679	0.6535	1.0109	0.989102	0.0217951		0.3271	0.3269	1.00031	0.999694	0.000611621		0.7294	0.7381	0.887545	0.898132	0.0105863		50.2215	50.8108	1.19714	1.21119	0.0140473		5.941	6.2327	0.976039	1.02396	0.047923		7	7	1	1	0		0.8279	0.8347	0.99591	1.00409	0.00817996		0.0826	0.082	1.00365	0.996355	0.0072904		0.5691	0.5696
			CV Sc ECC						CV Frac AREA						CV ECC						CV AVG OBJ						CV Peak Len						CV no. obj.						CV prim div area						CV hue
			0.0240232						0.0254937						0.0195996						0.240955						0.0318485						0.107099						0.039579						0.0267931
		smith	0.0279277					smith	0.0288491					smith	0.0178844					smith	0.260778					smith	0.0319602					smith	0.114528					smith	0.0382641					smith	0.029159
		field	0.0100321					field	0.0134701					field	0.0257458					field	0.169922					field	0.0314485					field	0.0804803					field	0.0442907					field	0.0183155
		min	0					min	0.000611621					min	0					min	0.000445755					min	0.000192934					min	0					min	0.00108271					min	0.00128783
		max	0.226903					max	0.177436					max	0.167799					max	3.48628					max	0.124105					max	0.666667					max	0.241374					max	0.179402
[truncated: 63 more columns]

## Sheet: Right
RightSC ECC						Rightfrac area						RightECC						RightAVG OBJ						RightPeak LEn						Rightno. obj.						Rightperim div area						Righthue						Rightsaturatn
image 1	image 2	image 1 Norm	image 2 Norm	diff		image 1	image 2	image 1 Norm	image 2 Norm	diff		image 1	image 2	image 1 Norm	image 2 Norm	diff		image 1	image 2	image 1 Norm	image 2 Norm	diff		image 1	image 2	image 1 Norm	image 2 Norm	diff		image 1	image 2	image 1 Norm	image 2 Norm	diff		image 1	image 2	image 1 Norm	image 2 Norm	diff		image 1	image 2	image 1 Norm	image 2 Norm	diff		image 1	image 2
0.7509	0.7632	0.991876	1.00812	0.0162473		0.3239	0.3464	0.966433	1.03357	0.0671341		0.801	0.8337	0.973464	1.0132	0.0397407		27.8348	24.636	0.745775	0.66007	0.0857051		5.5616	5.3396	1.02036	0.979635	0.0407295		6	6	1	1	0		0.9428	0.8885	1.02965	0.970349	0.0593021		0.0783	0.0799	0.989886	1.01011	0.0202276		0.4469	0.4493
0.7349	0.7318	1.00211	0.997886	0.00422718		0.3951	0.4062	0.986148	1.01385	0.027705		0.8614	0.8615	1.04687	1.04699	0.000121531		33.642	43.1554	0.901366	1.15626	0.254891		4.7906	4.9399	0.984656	1.01534	0.030687		15	12	1.11111	0.888889	0.222222		0.9955	1.0325	0.981755	1.01824	0.0364892		0.0865	0.0855	1.00581	0.994186	0.0116279		0.3339	0.3351
0.7267	0.7037	1.01608	0.983921	0.0321588		0.4556	0.459	0.996283	1.00372	0.00743494		0.8217	0.8213	0.998621	0.998135	0.000486124		139.899	150.57	3.74831	4.03419	0.285883		6.7579	6.9246	0.987817	1.01218	0.0243669		15	13	1.07143	0.928571	0.142857		0.5515	0.5786	0.97602	1.02398	0.0479604		0.0869	0.0846	1.01341	0.986589	0.0268222		0.5176	0.5177
0.7159	0.7137	1.00154	0.998461	0.00307778		0.401	0.4043	0.995902	1.0041	0.0081957		0.8366	0.7941	1.01673	0.965079	0.0516507		40.8834	38.0416	1.09538	1.01924	0.07614		5.1606	5.1869	0.997458	1.00254	0.00508335		18	19	0.972973	1.02703	0.0540541		0.865	0.8457	1.01128	0.988718	0.0225639		0.0716	0.0722	0.995828	1.00417	0.00834492		0.5363	0.5491
0.7182	0.7278	0.993361	1.00664	0.013278		0.3146	0.3114	1.00511	0.994888	0.0102236		0.8725	0.8858	1.06036	1.07652	0.0161636		17.7556	18.8881	0.475724	0.506067	0.0303429		4.7658	4.8177	0.994584	1.00542	0.0108311		25	24	1.02041	0.979592	0.0408163		1.1829	1.195	0.994911	1.00509	0.010177		0.084	0.0846	0.996441	1.00356	0.00711744		0.5806	0.5779
0.6364	0.6592	0.982402	1.0176	0.035196		0.2773	0.2823	0.991065	1.00893	0.0178699		0.8279	0.8456	1.00616	1.02767	0.021511		18.6332	17.4595	0.499237	0.46779	0.0314468		5.3998	5.2706	1.01211	0.987892	0.0242165		2	2	1	1	0		1.0643	1.0541	1.00481	0.995185	0.00962991		0.0681	0.0694	0.990545	1.00945	0.0189091		0.6087	0.6019
0.7176	0.7136	1.00279	0.997205	0.00558971		0.2863	0.2857	1.00105	0.998951	0.0020979		0.809	0.7914	0.983187	0.961797	0.0213895		21.7859	28.7654	0.583707	0.770708	0.187001		5.4405	5.5261	0.992194	1.00781	0.015611		19	14	1.15152	0.848485	0.30303		0.9976	1.002	0.9978	1.0022	0.00440088		0.0954	0.0931	1.0122	0.987798	0.0244032		0.3573	0.3572
0.7694	0.7732	0.997537	1.00246	0.00492675		0.3607	0.358	1.00376	0.996243	0.00751357		0.8555	0.8479	1.0397	1.03046	0.00923636		17.5298	16.722	0.469674	0.448031	0.0216433		4.8448	4.7524	1.00963	0.990372	0.0192556		17	17	1	1	0		1.0106	0.9822	1.01425	0.985749	0.0285026		0.1196	0.1188	1.00336	0.996644	0.00671141		0.5514	0.5486
0.6914	0.6834	1.00582	0.994181	0.0116381		0.3566	0.3598	0.995533	1.00447	0.00893356		0.8203	0.823	0.99692	1.0002	0.00328134		29.5666	31.8118	0.792175	0.85233	0.0601554		5.0977	5.3299	0.977732	1.02227	0.0445357		12	12	1	1	0		0.9013	0.9354	0.981434	1.01857	0.0371318		0.0928	0.0912	1.0087	0.991304	0.0173913		0.5954	0.5966
0.6209	0.6267	0.995351	1.00465	0.00929785		0.3697	0.3739	0.994352	1.00565	0.0112964		0.8696	0.8705	1.05683	1.05793	0.00109378		41.2923	41.279	1.10634	1.10598	0.000356345		5.8602	6.0445	0.984519	1.01548	0.0309626		2	2	1	1	0		0.8646	0.876	0.993451	1.00655	0.0130989		0.0815	0.0774	1.0258	0.974198	0.0516048		0.4248	0.432
0.6076	0.5816	1.02186	0.978137	0.0437269		0.2967	0.2913	1.00918	0.990816	0.0183673		0.6777	0.6669	0.823616	0.810491	0.0131254		82.0646	78.2081	2.19875	2.09542	0.103327		6.7042	6.7683	0.995242	1.00476	0.00951568		5	5	1	1	0		0.7023	0.6952	1.00508	0.994919	0.010161		0.0931	0.094	0.99519	1.00481	0.00962052		0.5823	0.5822
0.6985	0.7177	0.986443	1.01356	0.0271148		0.4042	0.4031	1.00136	0.998637	0.00272513		0.9254	0.9236	1.12465	1.12246	0.00218756		48.8123	48.4532	1.30782	1.2982	0.00962133		5.4733	5.4817	0.999233	1.00077	0.00153355		9	9	1	1	0		0.8856	0.8677	1.01021	0.989791	0.0204186		0.095	0.0949	1.00053	0.999473	0.00105319		0.4893	0.4883
0.7154	0.7066	1.00619	0.993812	0.0123769		0.3327	0.3367	0.994024	1.00598	0.011951		0.8009	0.7802	0.973343	0.948186	0.0251569		20.426	18.5538	0.547272	0.49711	0.0501616		4.4147	4.4444	0.996648	1.00335	0.00670497		2	2	1	1	0		1.0696	1.0425	1.01283	0.987169	0.0256617		0.0752	0.0738	1.0094	0.990604	0.0187919		0.4183	0.4121
0.6811	0.6721	1.00665	0.993349	0.0133018		0.2774	0.2823	0.991245	1.00875	0.0175094		0.798	0.7738	0.969818	0.940408	0.0294105		28.17	32.0821	0.754756	0.859572	0.104816		5.6103	5.8084	0.982651	1.01735	0.0346975		9	8	1.05882	0.941176	0.117647		0.8354	0.8516	0.990397	1.0096	0.0192057		0.0921	0.0924	0.998374	1.00163	0.00325203		0.6651	0.6672
0.7169	0.7288	0.991769	1.00823	0.0164626		0.335	0.3358	0.998807	1.00119	0.00238521		0.7892	0.806	0.959124	0.979541	0.0204172		27.8828	27.4324	0.747061	0.734993	0.0120675		4.9309	5.1001	0.983132	1.01687	0.0337354		17	18	0.971429	1.02857	0.0571429		0.9604	0.9836	0.988066	1.01193	0.0238683		0.0862	0.0865	0.998263	1.00174	0.00347423		0.5988	0.5986
0.7161	0.7276	0.992034	1.00797	0.0159313		0.3649	0.3732	0.988755	1.01125	0.0224902		0.7851	0.8018	0.954141	0.974436	0.0202957		18.9526	22.5791	0.507795	0.604959	0.0971644		5.2674	5.5485	0.97401	1.02599	0.051979		19	16	1.08571	0.914286	0.171429		0.9131	0.9475	0.981511	1.01849	0.0369773		0.0798	0.0785	1.00821	0.991788	0.0164245		0.4889	0.4945
0.7651	0.7688	0.997588	1.00241	0.0048243		0.4613	0.4535	1.00853	0.991474	0.0170529		0.8748	0.8775	1.06315	1.06644	0.00328134		80.7682	85.3814	2.16401	2.28761	0.123601		4.7467	4.8096	0.993418	1.00658	0.0131641		3	3	1	1	0		0.7723	0.8176	0.971508	1.02849	0.0569847		0.0721	0.0726	0.996545	1.00346	0.00691085		0.5137	0.5145
0.7658	0.7639	1.00124	0.998758	0.00248415		0.3011	0.2967	1.00736	0.99264	0.0147206		0.8276	0.8655	1.00579	1.05185	0.0460603		20.9698	27.0779	0.561842	0.725495	0.163654		5.3193	5.4105	0.9915	1.0085	0.0169994		8	6	1.14286	0.857143	0.285714		0.905	0.9976	0.95133	1.04867	0.0973405		0.0766	0.0747	1.01256	0.987442	0.0251157		0.4758	0.4769
0.6259	0.6428	0.986679	1.01332	0.0266414		0.335	0.3367	0.997469	1.00253	0.00506178		0.814	0.8849	0.989263	1.07543	0.0861656		20.3757	22.7982	0.545924	0.61083	0.0649058		4.4566	4.6243	0.981533	1.01847	0.0369347		10	9	1.05263	0.947368	0.105263		1.2046	1.1765	1.0118	0.988199	0.0236025		0.0988	0.1002	0.992965	1.00704	0.0140704		0.4628	0.4524
0.594	0.5989	0.995892	1.00411	0.00821527		0.2431	0.2418	1.00268	0.997319	0.00536193		0.773	0.6973	0.939436	0.847436	0.0919991		22.9621	26.1488	0.615221	0.700602	0.0853809		6.2243	6.6315	0.968326	1.03167	0.0633488		9	8	1.05882	0.941176	0.117647		0.973	1.0104	0.981143	1.01886	0.037713		0.1159	0.0972	1.08775	0.912248	0.175504		0.3938	0.4085
0.6928	0.6982	0.996118	1.00388	0.0077642		0.374	0.3828	0.988372	1.01163	0.0232558		0.8395	0.7534	1.02025	0.915615	0.104638		59.6471	37.0731	1.59812	0.993295	0.604823		4.9481	5.1377	0.981201	1.0188	0.0375974		8	12	0.8	1.2	0.4		0.8761	0.6955	1.11491	0.885085	0.229829		0.0648	0.0667	0.985551	1.01445	0.0288973		0.4625	0.4682
0.666	0.6731	0.994698	1.0053	0.0106041		0.3652	0.342	1.03281	0.967195	0.0656109		0.8359	0.8405	1.01588	1.02147	0.00559043		29.6623	35.7095	0.794739	0.956761	0.162022		5.4862	5.102	1.03629	0.963714	0.0725714		14	12	1.07692	0.923077	0.153846		0.8723	0.8782	0.99663	1.00337	0.00674093		0.0696	0.0619	1.05856	0.941445	0.11711		0.3933	0.4059
0.6107	0.562	1.04153	0.958472	0.0830562		0.3011	0.2895	1.01964	0.980359	0.0392821		0.8001	0.7604	0.97237	0.924123	0.0482479		28.8481	21.1717	0.772924	0.567251	0.205673		5.9024	5.3967	1.04476	0.955244	0.0895116		2	2	1	1	0		0.9965	0.9125	1.044	0.955998	0.0880042		0.1014	0.0974	1.02012	0.979879	0.0402414		0.2913	0.2886
0.712	0.7255	0.990609	1.00939	0.0187826		0.3169	0.3042	1.02045	0.979552	0.0408952		0.7936	0.7761	0.964471	0.943203	0.0212679		24.8927	29.3318	0.666947	0.785884	0.118936		5.096	5.5118	0.960802	1.0392	0.0783951		19	17	1.05556	0.944444	0.111111		0.9675	1.0249	0.971191	1.02881	0.057619		0.0701	0.0648	1.03929	0.960712	0.0785767		0.3501	0.3519
0.5921	0.5735	1.01596	0.984043	0.0319149		0.2683	0.2793	0.979912	1.02009	0.0401753		0.8776	0.866	1.06656	1.05246	0.0140976		14.4268	15.8316	0.386536	0.424174	0.0376386		5.1383	5.1044	1.00331	0.99669	0.00661935		28	26	1.03704	0.962963	0.0740741		1.2375	1.2255	1.00487	0.995128	0.00974421		0.0749	0.0734	1.01011	0.989885	0.0202293		0.4236	0.4252
0.5264	0.5387	0.988452	1.01155	0.0230964		0.3944	0.3696	1.03246	0.967539	0.0649215		0.9327	0.9422	1.13352	1.14507	0.0115455		41.1217	48.5149	1.10177	1.29985	0.198085		5.0522	4.8763	1.01772	0.982283	0.0354333		10	9	1.05263	0.947368	0.105263		0.8847	0.9159	0.982672	1.01733	0.0346551		0.0761	0.0768	0.995422	1.00458	0.00915631		0.4403	0.4385
0.702	0.7143	0.991315	1.00868	0.0173692		0.3786	0.3811	0.996709	1.00329	0.00658155		0.8154	0.8147	0.990965	0.990114	0.000850718		35.1091	39.9492	0.940674	1.07035	0.12968		5.4934	5.5688	0.993184	1.00682	0.013632		2	1	1.33333	0.666667	0.666667		0.7451	0.7638	0.987607	1.01239	0.0247863		0.0747	0.0758	0.992691	1.00731	0.0146179		0.4776	0.4765
0.7469	0.7894	0.972336	1.02766	0.0553277		0.3163	0.3072	1.0146	0.985405	0.0291901		0.9218	0.9159	1.12027	1.1131	0.00717034		47.2252	36.0983	1.2653	0.967178	0.298122		6.1744	5.6131	1.04762	0.952382	0.0952365		6	6	1	1	0		0.9673	0.8385	1.07133	0.928674	0.142651		0.0938	0.093	1.00428	0.995717	0.00856531		0.4243	0.4057
0.7791	0.7773	1.00116	0.998843	0.00231303		0.3167	0.3048	1.01915	0.980853	0.0382944		0.8843	0.8845	1.0747	1.07494	0.000243062		32.2558	33.9209	0.864226	0.908839	0.0446128		5.9279	6.1678	0.980167	1.01983	0.039667		9	9	1	1	0		0.8215	0.9274	0.939448	1.06055	0.121105		0.0761	0.0777	0.989597	1.0104	0.0208062		0.3466	0.3377
0.4632	0.4589	1.00466	0.995337	0.00932654		0.3369	0.3396	0.996009	1.00399	0.00798226		0.7725	0.7895	0.938828	0.959488	0.0206603		18.9668	19.248	0.508175	0.51571	0.00753416		4.2757	4.1675	1.01282	0.987185	0.0256301		5	4	1.11111	0.888889	0.222222		1.1605	1.1541	1.00277	0.997235	0.00553011		0.0733	0.0696	1.02589	0.974108	0.0517845		0.4129	0.4369
0.6963	0.6798	1.01199	0.98801	0.0239808		0.2339	0.2348	0.99808	1.00192	0.00384041		0.8918	0.9094	1.08381	1.1052	0.0213895		51.1175	25.9309	1.36959	0.694764	0.674822		6.9312	6.3768	1.04166	0.958341	0.0833183		4	8	0.666667	1.33333	0.666667		0.9972	0.8468	1.08156	0.918438	0.163124		0.08	0.0822	0.986436	1.01356	0.027127		0.284	0.2816
0.7525	0.7475	1.00333	0.996667	0.00666667		0.2763	0.2763	1	1	0		0.7989	0.8508	0.970912	1.03399	0.0630746		32.3519	27.2001	0.866801	0.728769	0.138032		5.6365	5.9047	0.976762	1.02324	0.046477		7	8	0.933333	1.06667	0.133333		0.9123	1.0148	0.946811	1.05319	0.106377		0.0851	0.0798	1.03214	0.967859	0.0642814		0.2736	0.2716
0.6863	0.6767	1.00704	0.992957	0.0140866		0.2885	0.2968	0.985819	1.01418	0.0283615		0.8745	0.8919	1.06279	1.08394	0.0211464		33.4649	39.968	0.896621	1.07086	0.174237		5.9217	5.936	0.998794	1.00121	0.00241193		6	5	1.09091	0.909091	0.181818		0.9814	0.988	0.996649	1.00335	0.00670255		0.0708	0.0725	0.988137	1.01186	0.0237264		0.3959	0.3985
0.6796	0.6653	1.01063	0.989367	0.0212655		0.2736	0.266	1.01408	0.985915	0.028169		0.879	0.8595	1.06826	1.04456	0.0236986		24.0134	24.9204	0.643388	0.667689	0.0243011		5.3856	5.2722	1.01064	0.98936	0.0212802		11	11	1	1	0		1.1326	1.1021	1.01365	0.986352	0.0272967		0.0789	0.0756	1.02136	0.978641	0.0427184		0.3907	0.3882
0.68	0.6685	1.00853	0.991472	0.017056		0.3393	0.3438	0.993412	1.00659	0.0131752		0.8169	0.8159	0.992788	0.991572	0.00121531		28.2048	30.482	0.755688	0.816701	0.0610128		4.6727	4.7815	0.988492	1.01151	0.0230162		12	11	1.04348	0.956522	0.0869565		0.9609	0.9644	0.998182	1.00182	0.0036358		0.0745	0.0749	0.997323	1.00268	0.00535475		0.4294	0.4281
0.6658	0.6648	1.00075	0.999248	0.00150308		0.2853	0.2924	0.98771	1.01229	0.0245802		0.8114	0.7816	0.986103	0.949887	0.0362163		19.3715	17.4614	0.519018	0.467841	0.0511771		4.624	4.6101	1.00151	0.998495	0.00301058		10	11	0.952381	1.04762	0.0952381		1.2175	1.1788	1.01615	0.98385	0.0322998		0.0717	0.0712	1.0035	0.996501	0.0069979		0.4453	0.4468
0.6721	0.681	0.993423	1.00658	0.013155		0.2719	0.2869	0.973157	1.02684	0.0536865		0.837	0.7571	1.01722	0.920112	0.0971034		41.9375	37.0929	1.12363	0.993826	0.129801		5.4669	5.8725	0.964231	1.03577	0.0715382		4	2	1.33333	0.666667	0.666667		0.8512	0.8241	1.01618	0.983824	0.0323524		0.0708	0.0715	0.995081	1.00492	0.00983837		0.4102	0.4155
0.77	0.7804	0.993292	1.00671	0.0134159		0.3057	0.2972	1.0141	0.985901	0.028197		0.7664	0.7456	0.931414	0.906136	0.0252785		38.0948	33.8718	1.02067	0.907523	0.113146		5.7519	5.6288	1.01082	0.989183	0.0216331		8	9	0.941176	1.05882	0.117647		0.9367	0.9538	0.990955	1.00905	0.0180905		0.0782	0.0781	1.00064	0.99936	0.00127959		0.4669	0.4606
0.8283	0.8334	0.996931	1.00307	0.00613829		0.2577	0.2486	1.01797	0.982026	0.0359471		0.8961	0.9112	1.08904	1.10739	0.0183512		23.3635	23.3616	0.625976	0.625925	5.09065e-05		5.5705	5.5059	1.00583	0.994168	0.0116644		7	7	1	1	0		1.3586	1.3614	0.998971	1.00103	0.00205882		0.0862	0.0847	1.00878	0.991223	0.0175541		0.3306	0.3191
0.7499	0.7575	0.994958	1.00504	0.0100836		0.3778	0.3999	0.971583	1.02842	0.0568343		0.6194	0.7988	0.752764	0.970791	0.218027		74.298	70.7447	1.99066	1.89545	0.0952032		5.2578	5.3274	0.993425	1.00658	0.0131504		2	2	1	1	0		0.6686	0.649	1.01488	0.985124	0.0297511		0.079	0.0813	0.985652	1.01435	0.0286962		0.4399	0.4396
0.6525	0.6767	0.981794	1.01821	0.0364129		0.2339	0.2253	1.01873	0.981272	0.0374564		0.843	0.8392	1.02451	1.01989	0.00461818		13.9621	15.432	0.374085	0.413468	0.0393829		6.2398	5.473	1.06547	0.934533	0.130934		7	6	1.07692	0.923077	0.153846		1.352	1.2084	1.05608	0.943915	0.11217		0.0776	0.0809	0.97918	1.02082	0.0416404		0.2878	0.293
0.6766	0.6907	0.989688	1.01031	0.0206246		0.2745	0.2669	1.01404	0.985962	0.0280754		0.8576	0.842	1.04225	1.02329	0.0189589		39.3234	38.9926	1.05359	1.04472	0.00886309		6.6993	6.5091	1.0144	0.9856	0.0287999		3	3	1	1	0		0.7968	0.7782	1.01181	0.98819	0.023619		0.0815	0.0812	1.00184	0.998156	0.00368777		0.4491	0.4513
0.5877	0.5774	1.00884	0.99116	0.0176809		0.3102	0.3111	0.998551	1.00145	0.00289715		0.8658	0.8513	1.05222	1.03459	0.017622		19.4928	22.614	0.522268	0.605894	0.083626		4.8445	4.9809	0.986118	1.01388	0.0277648		15	13	1.07143	0.928571	0.142857		1.183	1.2136	0.987232	1.01277	0.0255362		0.1047	0.1069	0.989603	1.0104	0.020794		0.418	0.4216
0.7952	0.7921	1.00195	0.998047	0.003906		0.2965	0.2957	1.00135	0.998649	0.00270179		0.8602	0.86	1.04541	1.04517	0.000243062		43.485	36.9039	1.16509	0.988762	0.176327		6.628	6.9617	0.975445	1.02456	0.0491107		9	8	1.05882	0.941176	0.117647		0.7882	0.8284	0.975133	1.02487	0.049734		0.1503	0.151	0.997677	1.00232	0.00464653		0.1686	0.167
0.8098	0.8098	1	1	0		0.2501	0.2501	1	1	0		0.8802	0.8802	1.06972	1.06972	0		33.2616	33.2616	0.891174	0.891174	0		6.5234	6.5234	1	1	0		15	15	1	1	0		0.8872	0.8872	1	1	0		0.0902	0.0902	1	1	0		0.4587	0.4587
0.7175	0.735	0.987952	1.01205	0.0240964		0.2075	0.2016	1.01442	0.985578	0.0288438		0.835	0.85	1.01478	1.03301	0.0182297		21.2593	24.4146	0.569598	0.654138	0.0845396		8.2602	8.2811	0.998736	1.00126	0.00252701		14	13	1.03704	0.962963	0.0740741		0.904	0.9567	0.971677	1.02832	0.0566453		0.0904	0.0887	1.00949	0.990508	0.0189838		0.4007	0.4066
0.7007	0.6926	1.00581	0.994186	0.0116271		0.3715	0.3792	0.989743	1.01026	0.0205142		0.7596	0.7768	0.92315	0.944054	0.0209034		33.8933	33.042	0.908099	0.885291	0.0228088		5.778	6.0854	0.974088	1.02591	0.0518233		12	13	0.96	1.04	0.08		0.8205	0.8231	0.998418	1.00158	0.00316379		0.187	0.1904	0.990991	1.00901	0.018018		0.2391	0.2423
0.7423	0.7709	0.9811	1.0189	0.0378007		0.3209	0.3359	0.977162	1.02284	0.045676		0.644	0.68	0.78266	0.826412	0.0437512		71.1881	48.0414	1.90733	1.28717	0.620167		5.3327	6.1266	0.93072	1.06928	0.13856		4	6	0.8	1.2	0.4		0.7357	0.7716	0.976183	1.02382	0.0476348		0.0692	0.0717	0.982257	1.01774	0.0354862		0.5153	0.5117
0.766	0.7715	0.996423	1.00358	0.00715447		0.2869	0.2776	1.01647	0.983525	0.0329495		0.7845	0.7854	0.953412	0.954505	0.00109378		38.6006	41.0454	1.03422	1.09972	0.0655033		6.0209	5.7936	1.01924	0.980761	0.0384781		8	14	0.727273	1.27273	0.545455		0.6009	0.6926	0.929107	1.07089	0.141786		0.1705	0.1715	0.997076	1.00292	0.00584795		0.1676	0.165
0.7647	0.766	0.999151	1.00085	0.00169857		0.348	0.3523	0.99386	1.00614	0.0122805		0.7465	0.7423	0.90723	0.902125	0.00510431		23.8098	27.5877	0.637933	0.739154	0.101221		5.2499	5.2382	1.00112	0.998884	0.0022311		16	14	1.06667	0.933333	0.133333		0.9415	0.9348	1.00357	0.996429	0.00714172		0.0928	0.0977	0.974278	1.02572	0.0514436		0.3079	0.312
0.8122	0.8095	1.00166	0.998335	0.00332984		0.4126	0.4091	1.00426	0.995741	0.00851892		0.8801	0.8916	1.0696	1.08357	0.0139761		66.614	93.2278	1.78478	2.49784	0.713061		5.673	5.9473	0.976395	1.02361	0.0472105		8	6	1.14286	0.857143	0.285714		0.7416	0.7559	0.990451	1.00955	0.0190985		0.114	0.1144	0.998249	1.00175	0.00350263		0.3383	0.3369
0.7164	0.7156	1.00056	0.999441	0.00111732		0.3839	0.3827	1.00157	0.998435	0.00313071		0.7138	0.6333	0.867489	0.769657	0.0978325		53.1897	55.1327	1.42511	1.47716	0.0520586		4.0342	3.8929	1.01782	0.982175	0.0356499		3	3	1	1	0		1.1598	1.1674	0.996734	1.00327	0.00653145		0.0836	0.0834	1.0012	0.998802	0.00239521		0.3621	0.3586
0.7232	0.727	0.99738	1.00262	0.00524066		0.3051	0.3025	1.00428	0.995721	0.00855826		0.8324	0.8208	1.01163	0.997527	0.0140976		52.4253	56.7726	1.40463	1.5211	0.116477		8.0121	8.4602	0.972797	1.0272	0.0544065		18	18	1	1	0		0.6386	0.6667	0.978472	1.02153	0.0430552		0.0995	0.0958	1.01895	0.981055	0.0378904		0.5124	0.515
0.7409	0.7323	1.00584	0.994162	0.0116753		0.2308	0.2344	0.992261	1.00774	0.0154772		0.8336	0.8278	1.01308	1.00603	0.0070488		29.5351	31.2839	0.791331	0.838186	0.0468554		8.4884	8.6331	0.991549	1.00845	0.0169027		17	16	1.0303	0.969697	0.0606061		0.7415	0.7433	0.998788	1.00121	0.00242457		0.0996	0.1002	0.996997	1.003	0.00600601		0.6006	0.6037
0.6786	0.6924	0.989934	1.01007	0.0201313		0.3142	0.3108	1.00544	0.99456	0.01088		0.8297	0.8418	1.00834	1.02305	0.0147053		50.1996	51.0686	1.34499	1.36828	0.023283		5.9533	5.9878	0.997111	1.00289	0.00577836		7	7	1	1	0		0.8168	0.8254	0.994763	1.00524	0.0104738		0.0884	0.0856	1.01609	0.983908	0.0321839		0.4862	0.4921
			CV Sc ECC						CV Frac AREA						CV ECC						CV AVG OBJ						CV Peak Len						CV no. obj.						CV prim div area						CV hue
			0.0162931						0.0213267						0.028014						0.132206						0.0352157						0.132598						0.0420465						0.024863
		smith	0.0178684					smith	0.0228707					smith	0.0303206					smith	0.122071					smith	0.0347485					smith	0.13014					smith	0.0447644					smith	0.0267688
		field	0.0106481					field	0.0157942					field	0.0197488					field	0.168525					field	0.0368898					field	0.141402					field	0.0323074					field	0.0180337
		min	0					min	0					min	0					min	0					min	0					min	0					min	0					min	0
		max	0.0830562					max	0.0671341					max	0.218027					max	0.713061					max	0.13856					max	0.666667					max	0.229829					max	0.175504
[truncated: 63 more columns]

## Sheet: scores
		Top View	Right View	Left View	Front View	Back View	Average CV Across Views
	CV yellow	0.0973539	0.0685427	0.125481	0.335062	0.0971437	0.144717	16	Yellow Contrast
	CV blue	0.0838184	0.0701037	0.144671	0.276535	0.106888	0.136403	14	Blue Contrast
	CV norm offset	0.168376	0.110432	0.129452	0.13264	0.140691	0.136318	19	Normalized Offset
	CV no. obj.	0.1118	0.132598	0.107099	0.112032	0.177785	0.128263	11	Number of Objects
	CV green	0.08289	0.0547993	0.0481109	0.310294	0.0625713	0.111733	15	Green Contrast
	CV int. contrast	0.082436	0.0504879	0.0431588	0.105173	0.0588309	0.0680173	10	Intensity Ratio
	CV red	0.0853055	0.0464364	0.0387788	0.0705485	0.0520957	0.058633	13	Red Contrast
	CV Euc dis	0.0831151	0.0439316	0.0396224	0.0658457	0.0556839	0.0576397	9	Euclidean Distance
	CV Value	0.0789404	0.0407809	0.0312251	0.060169	0.0456263	0.0513483	7	Brightness
	CV Peak Len	0.0519571	0.0352157	0.0318485	0.0577542	0.0734981	0.0500547	3	Peak Length
	CV prim div area	0.0436299	0.0420465	0.039579	0.0497681	0.048277	0.0446601	4	Perimeter/Area
	CV sym	0.0408302	0.0397325	0.0195274	0.0616779	0.0368515	0.0397239	8	Symmetry
	CV occ factor	0.0396675	0.0254648	0.0230355	0.045638	0.0557075	0.0379027	18	Occupation Factor
	CV hue	0.0463774	0.024863	0.0267931	0.0335015	0.0285386	0.0320147	5	Hue
	CV Frac AREA	0.0311852	0.0213267	0.0254937	0.0376891	0.0369728	0.0305335	1	Fractional Area
	CV cen ratio	0.0172248	0.0107565	0.00993427	0.0207603	0.0248896	0.0167131	17	Centrality Ratio
	CV Saturatn	0.0281891	0.0109507	0.010926	0.0180172	0.0136094	0.0163385	6	Saturation
	CV AVG OBJ	0.933834	0.132206	0.240955	0.180492	0.191785	0.335854	12	Average Area of Objects
	CV ECC	0.0326992	0.028014	0.0195996	0.0305546	0.0449851	0.0311705	2	Mean Eccentricity
	CV Sc ECC	0.0644029	0.0162931	0.0240232	0.0708818	0.0210336	0.0393269
	CV Sc rad	0.0415783	0.0247744	0.0232411	0.0223933	0.029509	0.0282992

## Sheet: scores_sorted_bad_old
	Top View			Right View			Left View			Front View			Back View				Avg CV
	CV norm offset	0.168376		CV no. obj.	0.132598		CV blue	0.144671		CV yellow	0.335062		CV no. obj.	0.177785		CV yellow	0.144717
	CV no. obj.	0.1118		CV norm offset	0.110432		CV norm offset	0.129452		CV green	0.310294		CV norm offset	0.140691		CV blue	0.136403
	CV yellow	0.0973539		CV blue	0.0701037		CV yellow	0.125481		CV blue	0.276535		CV blue	0.106888		CV norm offset	0.136318
	CV red	0.0853055		CV yellow	0.0685427		CV no. obj.	0.107099		CV norm offset	0.13264		CV yellow	0.0971437		CV no. obj.	0.128263
	CV blue	0.0838184		CV green	0.0547993		CV green	0.0481109		CV no. obj.	0.112032		Cv Peak Len	0.0734981		CV green	0.111733
	CV Euc dis	0.0831151		CV int. contrast	0.0504879		CV int. contrast	0.0431588		CV int. contrast	0.105173		CV green	0.0625713		CV int. contrast	0.0680173
	CV green	0.08289		CV red	0.0464364		CV Euc dis	0.0396224		Cv sc ECC	0.0708818		CV int. contrast	0.0588309		CV red	0.058633
	CV int. contrast	0.082436		CV Euc dis	0.0439316		CV prim div area	0.039579		CV red	0.0705485		CV occ factor	0.0557075		CV Euc dis	0.0576397
	CV Value	0.0789404		CV prim div area	0.0420465		CV red	0.0387788		CV Euc dis	0.0658457		CV Euc dis	0.0556839		CV Value	0.0513483
	CV Sc ECC	0.0644029		CV Value	0.0407809		Cv Peak Len	0.0318485		CV sym	0.0616779		CV red	0.0520957		CV Peak Len	0.0500547
	CV Peak Len	0.0519571		CV sym	0.0397325		CV Value	0.0312251		CV Value	0.060169		CV prim div area	0.048277		CV prim div area	0.0446601
	CV hue	0.0463774		Cv Peak Len	0.0352157		CV hue	0.0267931		Cv Peak Len	0.0577542		CV Value	0.0456263		CV sym	0.0397239
	CV prim div area	0.0436299		CV occ factor	0.0254648		CV Frac Area	0.0254937		CV prim div area	0.0497681		CV Frac Area	0.0369728		CV Sc ECC	0.0393269
	CV Sc rad	0.0415783		CV hue	0.024863		Cv sc ECC	0.0240232		CV occ factor	0.045638		CV sym	0.0368515		CV occ factor	0.0379027
	CV sym	0.0408302		CV sc rad	0.0247744		CV sc rad	0.0232411		CV Frac Area	0.0376891		CV sc rad	0.029509		CV hue	0.0320147
	CV occ factor	0.0396675		CV Frac Area	0.0213267		CV occ factor	0.0230355		CV hue	0.0335015		CV hue	0.0285386		CV Frac AREA	0.0305335
	CV Frac AREA	0.0311852		Cv sc ECC	0.0162931		CV sym	0.0195274		CV sc rad	0.0223933		CV cen ratio	0.0248896		CV Sc rad	0.0282992
	CV Saturatn	0.0281891		CV Saturation	0.0109507		CV Saturation	0.010926		CV cen ratio	0.0207603		Cv sc ECC	0.0210336		CV cen ratio	0.0167131
	CV cen ratio	0.0172248		CV cen ratio	0.0107565		CV cen ratio	0.00993427		CV Saturation	0.0180172		CV Saturation	0.0136094		CV Saturatn	0.0163385
	CV AVG OBJ	0.00112602		CV AVG OBJ	0.00120188		CV AVG OBJ	0.0021905		CV AVG OBJ	0.00164084		CV AVG OBJ	0.0017435		CV AVG OBJ	0.00158055
	CV ECC	0.000297265		CV ECC	0.000254673		CV ECC	0.000178178		CV ECC	0.000277769		CV ECC	0.000408956		CV ECC	0.000283368

## Sheet: scores_table
	Top View	Right View	Left View	Front View	Back View	Average CV Across Views	STDEV
Average Area of Objects	0.933834	0.132206	0.240955	0.180492	0.191785	0.335854	0.336508	12
Yellow Contrast	0.0973539	0.0685427	0.125481	0.335062	0.0971437	0.144717	0.108294	16
Blue Contrast	0.0838184	0.0701037	0.144671	0.276535	0.106888	0.136403	0.0832722	14
Normalized Offset	0.168376	0.110432	0.129452	0.13264	0.140691	0.136318	0.0210809	19
Number of Objects	0.1118	0.132598	0.107099	0.112032	0.177785	0.128263	0.0293837	11
Green Contrast	0.08289	0.0547993	0.0481109	0.310294	0.0625713	0.111733	0.111764	15
Intensity Ratio	0.082436	0.0504879	0.0431588	0.105173	0.0588309	0.0680173	0.0254856	10
Red Contrast	0.0853055	0.0464364	0.0387788	0.0705485	0.0520957	0.058633	0.0189676	13
Euclidean Distance	0.0831151	0.0439316	0.0396224	0.0658457	0.0556839	0.0576397	0.0175549	9
Brightness	0.0789404	0.0407809	0.0312251	0.060169	0.0456263	0.0513483	0.0186312	7
Peak Length	0.0519571	0.0352157	0.0318485	0.0577542	0.0734981	0.0500547	0.0170599	3
Perimeter/Area	0.0436299	0.0420465	0.039579	0.0497681	0.048277	0.0446601	0.00426858	4
Symmetry	0.0408302	0.0397325	0.0195274	0.0616779	0.0368515	0.0397239	0.0149946	8
Occupation Factor	0.0396675	0.0254648	0.0230355	0.045638	0.0557075	0.0379027	0.0137449	18
Hue	0.0463774	0.024863	0.0267931	0.0335015	0.0285386	0.0320147	0.0086457	5
Mean Eccentricity	0.0326992	0.028014	0.0195996	0.0305546	0.0449851	0.0311705	0.00918436	2
Fractional Area	0.0311852	0.0213267	0.0254937	0.0376891	0.0369728	0.0305335	0.00712838	1
Centrality Ratio	0.0172248	0.0107565	0.00993427	0.0207603	0.0248896	0.0167131	0.00642126	17
Saturation	0.0281891	0.0109507	0.010926	0.0180172	0.0136094	0.0163385	0.00722888	6

## Sheet: Visual (2)
	WS Name	Average Views
	Saturation	0.0163385	0.00722888
	Centrality Ratio	0.0167131	0.00642126
	Fractional Area	0.0305335	0.00712838
	Mean Eccentricity	0.0311705	0.00918436
	Hue	0.0320147	0.0086457
	Occupation Factor	0.0379027	0.0137449
	Symmetry	0.0397239	0.0149946
	Perimeter/Area	0.0446601	0.00426858
	Peak Length	0.0500547	0.0170599
	Brightness	0.0513483	0.0186312
	Euclidean Distance	0.0576397	0.0175549
	Red Contrast	0.058633	0.0189676
	Intensity Ratio	0.0680173	0.0254856
	Green Contrast	0.111733	0.111764
	Number of Objects	0.128263	0.0293837
	Normalized Offset	0.136318	0.0210809
	Blue Contrast	0.136403	0.0832722
	Yellow Contrast	0.144717	0.108294
	Avg Area of Objects	0.335854	0.336508
