# Supplementary material for: New approaches for capturing and estimating variation in complex animal color patterns from digital photographs: application to the Eastern Box Turtle (Terrapene carolina)
Source: PeerJ. 2025 Jul 21;13:e19690. doi: 10.7717/peerj.19690 (PMC12288748; doi:10.7717/peerj.19690)
Supplement: Supplemental Information 2 — Correspondence between the different naming schemes for the different turtle subsets (all images, Smithsonian or Mason Neck or Clifton, measurement study or consensus survey) and where to find the images in the dng directories. [file peerj-13-19690-s002.xlsx]

## Sheet: 55 Turtles Measurement Study
55 Turtles	2024 Survey Number				Indiv (as listed in Measurement Study)
45779	1001	1		1	17923
497243	1002	2		2	20544
288187	1004	3		3	22468
42825	1005	4		4	22609
20544	1006	5		5	22612
519622	1008	6		6	22613
141485	1009	7		7	22614
575054	1013	8		8	27761
497302	1015	9		9	36684
203309	1018	10		10	42824
mn2	1019	11		11	42825
22609	1025	12		12	45769
mn14	1027	13		13	45779
497248	1032	14		14	49607
497261	1033	15		15	52615
288199	1034	16		16	65908
22613	1036	17		17	139661
mn16	1038	18		18	141485
22612	1042	19		19	203066
288185	1044	20		20	203309
324296	1045	21		21	288185
288189	1046	22		22	288186
mn1	1047	23		23	288187
mn15	1049	24		24	288189
497193	1051	25		25	288199
288210	1053	26		26	288210
17923	1054	27		27	324296
52615	1055	28		28	326308
42824	1056	29		29	497193
497237	1057	30		30	497202
497203	1060	31		31	497203
497272	1062	32		32	497237
49607	1064	33		33	497243
497252	1065	34		34	497248
139661	1066	35		35	497251
22468	1067	36		36	497252
519611	1070	37		37	497261
288186	1072	38		38	497272
mn9	1075	39		39	497276
45769	1079	40		40	497302
mn10	1080	41		41	519611
65908	1081	42		42	519622
203066	1082	43		43	575054
mn2i	1083	44		44	mn1
36684	1084	45		45	mn2
mn3	1085	46		46	mn3
22614	1086	47		47	mn8
mn8	1090	48		48	mn9
497251	1091	49		49	mn10
27761	1092	50		50	mn14
497202	1095	51		51	mn15
326308	1097	52		52	mn16
497276	1098	53		53	mn22
mn22	No Label	54		54	mn24
mn24	No Label	55		55	mn2i

## Sheet: 53 Turtles
turtle	53 / 55 with Survey Labels
turtle54	17923	1
turtle06	20544	2		55 Turtles	2024 Number
turtle67	22468	3		45779	1001	1
turtle25	22609	4		497243	1002	2
turtle42	22612	5		288187	1004	3
turtle36	22613	6		42825	1005	4
turtle86	22614	7		20544	1006	5
turtle92	27761	8		519622	1008	6
turtle84	36684	9		141485	1009	7
turtle56	42824	10		575054	1013	8
turtle05	42825	11		497302	1015	9
turtle79	45769	12		203309	1018	10
turtle01	45779	13		mn2	1019	11
turtle64	49607	14		22609	1025	12
turtle55	52615	15		mn14	1027	13
turtle81	65908	16		497248	1032	14
turtle66	139661	17		497261	1033	15
turtle09	141485	18		288199	1034	16
turtle82	203066	19		22613	1036	17
turtle18	203309	20		mn16	1038	18
turtle44	288185	21		22612	1042	19
turtle72	288186	22		288185	1044	20
turtle04	288187	23		324296	1045	21
turtle46	288189	24		288189	1046	22
turtle34	288199	25		mn1	1047	23
turtle53	288210	26		mn15	1049	24
turtle45	324296	27		497193	1051	25
turtle97	326308	28		288210	1053	26
turtle51	497193	29		17923	1054	27
turtle95	497202	30		52615	1055	28
turtle60	497203	31		42824	1056	29
turtle57	497237	32		497237	1057	30
turtle02	497243	33		497203	1060	31
turtle32	497248	34		497272	1062	32
turtle91	497251	35		49607	1064	33
turtle65	497252	36		497252	1065	34
turtle33	497261	37		139661	1066	35
turtle62	497272	38		22468	1067	36
turtle98	497276	39		519611	1070	37
turtle15	497302	40		288186	1072	38
turtle70	519611	41		mn9	1075	39
turtle08	519622	42		45769	1079	40
turtle13	575054	43		mn10	1080	41
turtle47	mn1	1		65908	1081	42
turtle80	mn10	2		203066	1082	43
turtle27	mn14	3		mn2i	1083	44
turtle49	mn15	4		36684	1084	45
turtle38	mn16	5		mn3	1085	46
turtle19	mn2	6		22614	1086	47
turtle83	mn2i	7		mn8	1090	48
turtle85	mn3	8		497251	1091	49
turtle90	mn8	9		27761	1092	50
turtle75	mn9	10		497202	1095	51
turtle03				326308	1097	52
turtle07				497276	1098	53
turtle10				mn22	No Label	54
turtle11				mn24	No Label	55
turtle12
turtle14
turtle16
turtle17
turtle20
turtle21
turtle22
turtle23
turtle24
turtle26
turtle28
turtle29
turtle30
turtle31
turtle35
turtle37
turtle39
turtle40
turtle41
turtle43
turtle48
turtle50
turtle52
turtle58
turtle59
turtle61
turtle63
turtle68
turtle69
turtle71
turtle73
turtle74
turtle76
turtle77
turtle78
turtle87
turtle88
turtle89
turtle93
turtle94
turtle96

## Sheet: All161Turtles
			2023 Number	One of the 98?	2024 Number
Smithsonian Pictures	Adult	id45779	1001	1	1001
Smithsonian Pictures	Adult	id497243	1002	1	1002
Smithsonian Pictures	Juvenile	id26172	1003	0	0
Smithsonian Pictures	Juvenile	id141486	1004	1	1003
Smithsonian Pictures	Juvenile	id230328	1005	0	0
Clifton Pictures	Individuals	id7-5_94	1006	0	0
Smithsonian Pictures	Adult	id288187	1007	1	1004
Smithsonian Pictures	Juvenile	id54750	1008	0	0
Smithsonian Pictures	Adult	id42825	1009	1	1005
Smithsonian Pictures	Hatchlings	id519654	1010	0	0
Smithsonian Pictures	Adult	id20544	1011	1	1006
Smithsonian Pictures	Adult	id22608	1012	1	1007
Smithsonian Pictures	Juvenile	id16229	1013	0	0
Smithsonian Pictures	Juvenile	id519622	1014	1	1008
Smithsonian Pictures	Adult	id141485	1015	1	1009
Smithsonian Pictures	Hatchling	id519670	1016	0	0
Smithsonian Pictures	Hatchlings	id519665	1017	0	0
Smithsonian Pictures	Hatchlings	id519644	1018	0	0
Smithsonian Pictures	Juvenile	id141937	1019	1	1010
Smithsonian Pictures	Hatchling	id519671	1020	0	0
Smithsonian Pictures	Juvenile	id38892	1021	0	0
Smithsonian Pictures	Hatchling	id22289	1022	0	0
Smithsonian Pictures	Juvenile	id67773	1023	0	0
Smithsonian Pictures	Adult	id497301	1024	1	1011
Smithsonian Pictures	Adult	id22611	1025	1	1012
Smithsonian Pictures	Adult	id519624	1026	1	1013
Smithsonian Pictures	Juvenile	id497300	1027	1	1014
Smithsonian Pictures	Hatchlings	id519632	1028	0	0
Clifton Pictures	Individuals	id7-5_57	1029	0	0
Smithsonian Pictures	Adult	id497302	1030	1	1015
Smithsonian Pictures	Adult	id288184	1031	1	1016
Mason Neck Pictures	Individuals	id7-27_11x	1032	1	1017
Smithsonian Pictures	Adult	id203309	1033	1	1018
Mason Neck Pictures	Individuals	id7-11_2	1034	1	1019
Smithsonian Pictures	Hatchlings	id519664	1035	0	0
Smithsonian Pictures	Adult	id29774	1036	1	1020
Smithsonian Pictures	Juvenile	id67772	1037	0	0
Smithsonian Pictures	Adult	id575054	1038	1	1021
Mason Neck Pictures	Individuals	id7-20_12	1039	1	1022
Mason Neck Pictures	Individuals	id7-20_11	1040	1	1023
Smithsonian Pictures	Adult	id45346	1041	1	1024
Smithsonian Pictures	Adult	id22609	1042	1	1025
Smithsonian Pictures	Juvenile	id49960	1043	1	1026
Mason Neck Pictures	Individuals	id7-21_14	1044	1	1027
Smithsonian Pictures	Adult	id288188	1045	1	1028
Smithsonian Pictures	Juvenile	id54749	1046	0	0
Smithsonian Pictures	Juvenile	id497299	1047	1	1029
Smithsonian Pictures	Juvenile	id22291	1048	0	0
Smithsonian Pictures	Adult	id288190	1049	1	1030
Mason Neck Pictures	Individuals	id7-11_4	1050	1	1031
Clifton Pictures	Individuals	id6-24_71	1051	0	0
Clifton Pictures	Individuals	id7-30_108	1052	0	0
Smithsonian Pictures	Adult	id497248	1053	1	1032
Smithsonian Pictures	Hatchlings	id519653	1054	0	0
Smithsonian Pictures	Adult	id497261	1055	1	1033
Smithsonian Pictures	Hatchlings	id519649	1056	0	0
Smithsonian Pictures	Hatchlings	id519627	1057	0	0
Smithsonian Pictures	Adult	id288199	1058	1	1034
Smithsonian Pictures	Hatchlings	id519655	1059	0	0
Smithsonian Pictures	Juvenile	id22290	1060	1	1035
Smithsonian Pictures	Adult	id22613	1061	1	1036
Smithsonian Pictures	Hatchlings	id519666	1062	0	0
Smithsonian Pictures	Hatchlings	id519626	1063	0	0
Smithsonian Pictures	Juvenile	id45781	1064	1	1037
Mason Neck Pictures	Individuals	id7-25_16	1065	1	1038
Mason Neck Pictures	Individuals	id7-13_6	1066	1	1039
Smithsonian Pictures	Adult	id497246	1067	1	1040
Smithsonian Pictures	Juvenile	id22465	1068	1	1041
Smithsonian Pictures	Juvenile	id80304	1069	0	0
Smithsonian Pictures	Adult	id22612	1070	1	1042
Smithsonian Pictures	Hatchlings	id519633	1071	0	0
Smithsonian Pictures	Hatchling	id519634	1072	0	0
Smithsonian Pictures	Juvenile	id54751	1073	0	0
Smithsonian Pictures	Hatchlings	id519631	1074	0	0
Smithsonian Pictures	Juvenile	id26173	1075	0	0
Smithsonian Pictures	Adult	id497232	1076	1	1043
Smithsonian Pictures	Hatchlings	id519646	1077	0	0
Smithsonian Pictures	Adult	id288185	1078	1	1044
Smithsonian Pictures	Adult	id324296	1079	1	1045
Smithsonian Pictures	Adult	id288189	1080	1	1046
Mason Neck Pictures	Individuals	id7-11_1	1081	1	1047
Smithsonian Pictures	Adult	id22618	1082	1	1048
Smithsonian Pictures	Hatchlings	id519656	1083	0	0
Mason Neck Pictures	Individuals	id7-21_15	1084	1	1049
Smithsonian Pictures	Juvenile	id37783	1085	0	0
Smithsonian Pictures	Juvenile	id103824	1086	1	1050
Smithsonian Pictures	Adult	id497193	1087	1	1051
Clifton Pictures	Individuals	id6-29_84	1088	0	0
Mason Neck Pictures	Individuals	id8-2_17	1089	0	0
Smithsonian Pictures	Adult	id22616	1090	1	1052
Smithsonian Pictures	Adult	id288210	1091	1	1053
Smithsonian Pictures	Hatchling	id519667	1092	0	0
Smithsonian Pictures	Adult	id17923	1093	1	1054
Smithsonian Pictures	Juvenile	id17461	1094	0	0
Smithsonian Pictures	Adult	id52615	1095	1	1055
Smithsonian Pictures	Juvenile	id38891	1096	0	0
Smithsonian Pictures	Adult	id42824	1097	1	1056
Smithsonian Pictures	Hatchlings	id519652	1098	0	0
Smithsonian Pictures	Adult	id497237	1099	1	1057
Smithsonian Pictures	Adult	id22619	1100	1	1058
Smithsonian Pictures	Juvenile	id139660	1101	0	0
Smithsonian Pictures	Adult	id497250	1102	1	1059
Smithsonian Pictures	Juvenile	id67771	1103	0	0
Smithsonian Pictures	Hatchling	id519669	1104	0	0
Smithsonian Pictures	Hatchlings	id519642	1105	0	0
Smithsonian Pictures	Adult	id497203	1106	1	1060
Smithsonian Pictures	Adult	id497254	1107	1	1061
Smithsonian Pictures	Juvenile	id588439	1108	0	0
Smithsonian Pictures	Adult	id497272	1109	1	1062
Smithsonian Pictures	Hatchling	id519668	1110	0	0
Smithsonian Pictures	Adult	id288209	1111	1	1063
Smithsonian Pictures	Adult	id49607	1112	1	1064
Smithsonian Pictures	Hatchlings	id519661	1113	0	0
Smithsonian Pictures	Hatchlings	id519663	1114	0	0
Smithsonian Pictures	Adult	id497252	1115	1	1065
Smithsonian Pictures	Adult	id139661	1116	1	1066
Smithsonian Pictures	Adult	id22468	1117	1	1067
Smithsonian Pictures	Juvenile	id519618	1118	1	1068
Smithsonian Pictures	Hatchlings	id519625	1119	0	0
Mason Neck Pictures	Individuals	id7-25_440x	1120	1	1069
Smithsonian Pictures	Adult	id519611	1121	1	1070
Smithsonian Pictures	Hatchlings	id519662	1122	0	0
Smithsonian Pictures	Juvenile	id45780	1123	1	1071
Smithsonian Pictures	Hatchlings	id519643	1124	0	0
Smithsonian Pictures	Adult	id288186	1125	1	1072
Smithsonian Pictures	Juvenile	id17375	1126	0	0
Smithsonian Pictures	Juvenile	id48676	1127	1	1073
Mason Neck Pictures	Individuals	id7-13_7	1128	1	1074
Mason Neck Pictures	Individuals	id7-13_9	1129	1	1075
Smithsonian Pictures	Adult	id22610	1130	1	1076
Smithsonian Pictures	Adult	id497236	1131	1	1077
Clifton Pictures	Individuals	id6-30_93	1132	0	0
Smithsonian Pictures	Adult	id497268	1133	1	1078
Smithsonian Pictures	Adult	id45769	1134	1	1079
Mason Neck Pictures	Individuals	id7-20_10	1135	1	1080
Smithsonian Pictures	Adult	id65908	1136	1	1081
Smithsonian Pictures	Adult	id203066	1137	1	1082
Mason Neck Pictures	Individuals	id7-21_21x	1138	1	1083
Smithsonian Pictures	Adult	id36684	1139	1	1084
Mason Neck Pictures	Individuals	id7-11_3	1140	1	1085
Smithsonian Pictures	Adult	id22614	1141	1	1086
Smithsonian Pictures	Juvenile	id17014	1142	1	1087
Smithsonian Pictures	Hatchlings	id519630	1143	0	0
Mason Neck Pictures	Individuals	id7-20_13	1144	1	1088
Smithsonian Pictures	Adult	id497235	1145	1	1089
Mason Neck Pictures	Individuals	id7-13_8	1146	1	1090
Smithsonian Pictures	Adult	id497251	1147	1	1091
Smithsonian Pictures	Adult	id27761	1148	1	1092
Smithsonian Pictures	Adult	id288179	1149	1	1093
Smithsonian Pictures	Juvenile	id374959	1150	0	0
Smithsonian Pictures	Hatchlings	id519647	1151	0	0
Smithsonian Pictures	Juvenile	id62012	1152	0	0
Clifton Pictures	Individuals	id7-22_107	1153	0	0
Clifton Pictures	Individuals	id7-5_91	1154	0	0
Mason Neck Pictures	Individuals	id7-12_5	1155	1	1094
Smithsonian Pictures	Adult	id497202	1156	1	1095
Smithsonian Pictures	Adult	id11600	1157	1	1096
Smithsonian Pictures	Adult	id326308	1158	1	1097
Smithsonian Pictures	Juvenile	id19036	1159	0	0
Smithsonian Pictures	Adult	id497276	1160	1	1098

## Sheet: 98 Turtles
			2023 Number	One of the 98?	2024 Number
Mason Neck Pictures	Individuals	id7-27_11x	1032	1	1017
Mason Neck Pictures	Individuals	id7-11_2	1034	1	1019
Mason Neck Pictures	Individuals	id7-20_12	1039	1	1022
Mason Neck Pictures	Individuals	id7-20_11	1040	1	1023
Mason Neck Pictures	Individuals	id7-21_14	1044	1	1027
Mason Neck Pictures	Individuals	id7-11_4	1050	1	1031
Mason Neck Pictures	Individuals	id7-25_16	1065	1	1038
Mason Neck Pictures	Individuals	id7-13_6	1066	1	1039
Mason Neck Pictures	Individuals	id7-11_1	1081	1	1047
Mason Neck Pictures	Individuals	id7-21_15	1084	1	1049
Mason Neck Pictures	Individuals	id7-25_440x	1120	1	1069
Mason Neck Pictures	Individuals	id7-13_7	1128	1	1074
Mason Neck Pictures	Individuals	id7-13_9	1129	1	1075
Mason Neck Pictures	Individuals	id7-20_10	1135	1	1080
Mason Neck Pictures	Individuals	id7-21_21x	1138	1	1083
Mason Neck Pictures	Individuals	id7-11_3	1140	1	1085
Mason Neck Pictures	Individuals	id7-20_13	1144	1	1088
Mason Neck Pictures	Individuals	id7-13_8	1146	1	1090
Mason Neck Pictures	Individuals	id7-12_5	1155	1	1094
Smithsonian Pictures	Adult	id45779	1001	1	1001			98
Smithsonian Pictures	Adult	id497243	1002	1	1002
Smithsonian Pictures	Adult	id288187	1007	1	1004
Smithsonian Pictures	Adult	id42825	1009	1	1005
Smithsonian Pictures	Adult	id20544	1011	1	1006
Smithsonian Pictures	Adult	id22608	1012	1	1007
Smithsonian Pictures	Adult	id141485	1015	1	1009
Smithsonian Pictures	Adult	id497301	1024	1	1011
Smithsonian Pictures	Adult	id22611	1025	1	1012
Smithsonian Pictures	Adult	id519624	1026	1	1013
Smithsonian Pictures	Adult	id497302	1030	1	1015
Smithsonian Pictures	Adult	id288184	1031	1	1016
Smithsonian Pictures	Adult	id203309	1033	1	1018
Smithsonian Pictures	Adult	id29774	1036	1	1020
Smithsonian Pictures	Adult	id575054	1038	1	1021
Smithsonian Pictures	Adult	id45346	1041	1	1024
Smithsonian Pictures	Adult	id22609	1042	1	1025
Smithsonian Pictures	Adult	id288188	1045	1	1028
Smithsonian Pictures	Adult	id288190	1049	1	1030
Smithsonian Pictures	Adult	id497248	1053	1	1032
Smithsonian Pictures	Adult	id497261	1055	1	1033
Smithsonian Pictures	Adult	id288199	1058	1	1034
Smithsonian Pictures	Adult	id22613	1061	1	1036
Smithsonian Pictures	Adult	id497246	1067	1	1040
Smithsonian Pictures	Adult	id22612	1070	1	1042
Smithsonian Pictures	Adult	id497232	1076	1	1043
Smithsonian Pictures	Adult	id288185	1078	1	1044
Smithsonian Pictures	Adult	id324296	1079	1	1045
Smithsonian Pictures	Adult	id288189	1080	1	1046
Smithsonian Pictures	Adult	id22618	1082	1	1048
Smithsonian Pictures	Adult	id497193	1087	1	1051
Smithsonian Pictures	Adult	id22616	1090	1	1052
Smithsonian Pictures	Adult	id288210	1091	1	1053
Smithsonian Pictures	Adult	id17923	1093	1	1054
Smithsonian Pictures	Adult	id52615	1095	1	1055
Smithsonian Pictures	Adult	id42824	1097	1	1056
Smithsonian Pictures	Adult	id497237	1099	1	1057
Smithsonian Pictures	Adult	id22619	1100	1	1058
Smithsonian Pictures	Adult	id497250	1102	1	1059
Smithsonian Pictures	Adult	id497203	1106	1	1060
Smithsonian Pictures	Adult	id497254	1107	1	1061
Smithsonian Pictures	Adult	id497272	1109	1	1062
Smithsonian Pictures	Adult	id288209	1111	1	1063
Smithsonian Pictures	Adult	id49607	1112	1	1064
Smithsonian Pictures	Adult	id497252	1115	1	1065
Smithsonian Pictures	Adult	id139661	1116	1	1066
Smithsonian Pictures	Adult	id22468	1117	1	1067
Smithsonian Pictures	Adult	id519611	1121	1	1070
Smithsonian Pictures	Adult	id288186	1125	1	1072
Smithsonian Pictures	Adult	id22610	1130	1	1076
Smithsonian Pictures	Adult	id497236	1131	1	1077
Smithsonian Pictures	Adult	id497268	1133	1	1078
Smithsonian Pictures	Adult	id45769	1134	1	1079
Smithsonian Pictures	Adult	id65908	1136	1	1081
Smithsonian Pictures	Adult	id203066	1137	1	1082
Smithsonian Pictures	Adult	id36684	1139	1	1084
Smithsonian Pictures	Adult	id22614	1141	1	1086
Smithsonian Pictures	Adult	id497235	1145	1	1089
Smithsonian Pictures	Adult	id497251	1147	1	1091
Smithsonian Pictures	Adult	id27761	1148	1	1092
Smithsonian Pictures	Adult	id288179	1149	1	1093
Smithsonian Pictures	Adult	id497202	1156	1	1095
Smithsonian Pictures	Adult	id11600	1157	1	1096
Smithsonian Pictures	Adult	id326308	1158	1	1097
Smithsonian Pictures	Adult	id497276	1160	1	1098
Smithsonian Pictures	Juvenile	id141486	1004	1	1003		1
Smithsonian Pictures	Juvenile	id519622	1014	1	1008		2
Smithsonian Pictures	Juvenile	id141937	1019	1	1010		3
Smithsonian Pictures	Juvenile	id497300	1027	1	1014		4
Smithsonian Pictures	Juvenile	id49960	1043	1	1026		5
Smithsonian Pictures	Juvenile	id497299	1047	1	1029		6
Smithsonian Pictures	Juvenile	id22290	1060	1	1035		7
Smithsonian Pictures	Juvenile	id45781	1064	1	1037		8
Smithsonian Pictures	Juvenile	id22465	1068	1	1041		9
Smithsonian Pictures	Juvenile	id103824	1086	1	1050		10
Smithsonian Pictures	Juvenile	id519618	1118	1	1068		11
Smithsonian Pictures	Juvenile	id45780	1123	1	1071		12
Smithsonian Pictures	Juvenile	id48676	1127	1	1073		13
Smithsonian Pictures	Juvenile	id17014	1142	1	1087		14

## Sheet: MasonNeck
			2024 Number in citizen science survey	turtleID	Measures?
Mason Neck Pictures	Individuals	id7-11_1	1047	mn1	yes
Mason Neck Pictures	Individuals	id7-11_2	1019	mn2	yes
Mason Neck Pictures	Individuals	id7-11_3	1085	mn3	yes
Mason Neck Pictures	Individuals	id7-11_4	1031	mn4	no
Mason Neck Pictures	Individuals	id7-12_5	1094	mn5	no
Mason Neck Pictures	Individuals	id7-13_6	1039	mn6	no
Mason Neck Pictures	Individuals	id7-13_7	1074	mn7	no
Mason Neck Pictures	Individuals	id7-13_8	1090	mn8	yes
Mason Neck Pictures	Individuals	id7-13_9	1075	mn9	yes
Mason Neck Pictures	Individuals	id7-20_10	1080	mn10	yes
Mason Neck Pictures	Individuals	id7-20_11	1023	mn11	no
Mason Neck Pictures	Individuals	id7-20_12	1022	mn12	no
Mason Neck Pictures	Individuals	id7-20_13	1088	mn13	no
Mason Neck Pictures	Individuals	id7-21_14	1027	mn14	yes
Mason Neck Pictures	Individuals	id7-21_15	1049	mn15	yes
Mason Neck Pictures	Individuals	id7-21_21x	1083	mn2i	yes
Mason Neck Pictures	Individuals	id7-25_16	1038	mn16	yes
Mason Neck Pictures	Individuals	id7-25_440x	1069	N/A	NO
Mason Neck Pictures	Individuals	id7-27_11x	1017	N/A	NO
Mason Neck Pictures	Individuals	id8-2_17	N/A	N/A	NO
			N/A	mn22	yes
			N/A	mn24	yes

## Sheet: SmithsonianID_Location
	ID	Location	County	Location
16	45346	District of Columbia		No Further Locality Data
34	17923	District of Columbia	Southwest Quadrant	Potomac Flats
44	49607	District of Columbia		No Further Locality Data
53	45769	District of Columbia	Northeast Quadrant	Brookland
54	65908	District of Columbia	Northwest Quadrant	Rock Creek Park
56	36684	District of Columbia		Congress Heights, 1 mi E of
60	27761	District of Columbia		No Further Locality Data
63	11600	District of Columbia	Northwest Quadrant	Rock Creek
79	17014	District of Columbia	Northeast Quadrant	Brookland
3	288187	Maryland	Prince Georges	Branchville
5	20544	Maryland	Montgomery	Kensington
7	141485	Maryland	Prince Georges	Calvert Road
12	288184	Maryland	Prince Georges	Branchville, Indian Creek
18	288188	Maryland	Prince Georges	Branchville
19	288190	Maryland	Prince Georges	Branchville
22	288199	Maryland	Prince Georges	Patuxent Wildlife Research Center, near mouth of Snowden Hall Brook
27	288185	Maryland	Prince Georges	Branchville
29	288189	Maryland	Prince Georges	Branchville
33	288210	Maryland	Prince Georges	Patuxent Wildlife Research Center, 50 ft N of post 1679 on plot line at W end of Refuge
43	288209	Maryland	Prince Georges	Patuxent Wildlife Research Center, on Service Road in Plot 4544
46	139661	Maryland	Montgomery	Chesapeake and Ohio Canal, opposite High Island
49	288186	Maryland	Prince Georges	Branchville
61	288179	Maryland	Montgomery	Plummers Island, near, tow path along Chesapeake and Ohio Canal
66	141486	Maryland	Prince Georges	College Park
70	49960	Maryland	Montgomery	Plummers Island
71	22290	Maryland	Montgomery	Kensington
72	22290	Maryland	Montgomery	Kensington
74	22465	Maryland	Montgomery	Woodside
75	103824	Maryland	Montgomery	FOREST GLEN
1	45779	Virginia	Arlington	Fort Myer
2	497243	Virginia	Buckingham	New Canton, 0.75 mi SSE of, on VA Route 670
4	42825	Virginia	Fairfax	Falls Church
6	22608	Virginia	Arlington	Fort Myer
8	497301	Virginia	Lee	Pennington Gap (town), 3.75 mi ENE of, 0.6 mi NE junction of VA Route 621 and VA Route 796 on VA Route 621
9	22611	Virginia	Arlington	Fort Myer
10	519624	Virginia	Arlington	Fort Myer
11	497302	Virginia	Buckingham	Buckingham, 1.4 mi E of, on US Highway 60
13	203309	Virginia	Fairfax	Vienna, ca. 150 ft behind 436 Blair Road
14	29774	Virginia	Arlington	Chain Bridge, near
15	575054	Virginia	Stafford	Quantico Marine Corps Base; 8A training area, NW of rapelling tower
17	22609	Virginia	Arlington	Fort Myer
20	497248	Virginia	Powhatan	Hatchers, 1.2 mi S of, 0.8 mi WSW of junction of US Highway 60 and VA Route 629 on US Highway 60
21	497261	Virginia	Suffolk (city)	Great Dismal Swamp National Wildlife Refuge, Jericho Ditch Lane, 0.9 mi W of entrance gate
23	22613	Virginia	Arlington	Fort Myer
24	497246	Virginia	Suffolk (city)	Suffolk, 3 mi E of, near NW boundary of Great Dismal Swamp National Wildlife Refuge, adjacent to Old Dominion University property
25	22612	Virginia	Arlington	Fort Myer
26	497232	Virginia	Lee	Rose Hill (town), 1.5 mi N of, VA Route 797 below east ridge of Cumberland Mountain
28	324296	Virginia	Powhatan	Flat Rock (town), near, 0.6 mi E of junction of US Highway 60 and VA Route 677
30	22618	Virginia	Arlington	Fort Myer
31	497193	Virginia	Buckingham	Buckingham, 13 mi WNW of, 4.1 mi N of junction of US Highway 60 and VA Route 605, along James River on VA Route 605
32	22616	Virginia	Arlington	Fort Myer
35	52615	Virginia	Arlington	Cherrydale, near
36	42824	Virginia	Fairfax	Falls Church
37	497237	Virginia	Lee	Hagan, 0.7 mi E of, on VA Route 621
38	22619	Virginia	Arlington	Fort Myer
39	497250	Virginia	Lee	Cumberland Gap National Historic Park, at mouth of Lewis Hollow
40	497203	Virginia	Nelson	Arrington, ca. 7.5 mi W of, 0.7 mi W of junction of US Highway 60 and VA Route 626
41	497254	Virginia	Lee	Jonesville, ca 1 mi WSW of, junction of VA Route 654 and VA Route 662
42	497272	Virginia	Nelson	Colleen, 1.3 mi S of, 0.3 mi S of junction of VA Route 669 and US Highway 29 on US Highway 29
45	497252	Virginia	Lee	Jonesville, 2.0 mi E of, near junction of VA Route 783 and VA Route 641 on VA Route 783, W bank of Powell River
47	22468	Virginia	Fairfax	Clifton Station
48	519611	Virginia	Buckingham	Buckingham, 3.0 mi WSW of, 0.3 mi NE of junction of US Highway 60 and VA Route 24 on US Highway 60
50	22610	Virginia	Arlington	Fort Myer
51	497236	Virginia	Lee	Rose Hill (town), 3.25 mi ENE of, 0.5 mi SW of junction of US Highway 58 and VA Route 670
52	497268	Virginia	Suffolk (city)	Great Dismal Swamp National Wildlife Refuge, 200 m W of entrance at Washington Ditch
55	203066	Virginia	Stafford	Quantico Marine Base, on VA Route 610, ca. 2 mi E of intersection with VA Route 612
57	22614	Virginia	Arlington	Fort Myer
58	497235	Virginia	Lee	Rose Hill (town), 1.5 mi N of, VA Route 797 below east ridge of Cumberland Mountain
59	497251	Virginia	Lee	Cumberland Gap National Historic Park, Wilderness Road area, 0.3 mi W US Highway 58
62	497202	Virginia	Nelson	Arrington, ca. 7.5 mi W of, 0.7 mi W of junction of US Highway 60 and VA Route 626
64	326308	Virginia	Fairfax	Springfield, Daventry
65	497276	Virginia	Buckingham	Mt. Rush (town), 0.2 mile SW of junction of US Highway 60 and VA Route 24
67	519622	Virginia	Buckingham	Dentons Corner (junction of US Highway 60 and VA Route 56), 0.2 mile SW of, on US Highway 60
68	141937	Virginia	Arlington	Bluemont Junction
69	497300	Virginia	Lee	Jonesville, ca. 2.5 mi SE of, ca. 0.1 mile SW of junction of VA Route 783 and VA Route 641 on VA Route 783
73	45781	Virginia	Arlington	Fort Myer
76	519618	Virginia	Buckingham	Buckingham, 9.75 mi WSW of, 0.5 mi W of junction of VA Route 615 and US Highway 60 on US Highway 60
77	45780	Virginia	Arlington	Fort Myer
78	48676	Virginia	Fairfax	No Further Locality Data

## Sheet: AllImageNames
FieldData\Clifton Pictures\Individuals\6-24_71	PXL_20220624_142250101.dng	1
FieldData\Clifton Pictures\Individuals\6-24_71	PXL_20220624_142628779.dng	2
FieldData\Clifton Pictures\Individuals\6-24_71	PXL_20220624_142834869.dng	3
FieldData\Clifton Pictures\Individuals\6-24_71	PXL_20220624_143112543.dng	4
FieldData\Clifton Pictures\Individuals\6-24_71	PXL_20220624_143236132.dng	5
FieldData\Clifton Pictures\Individuals\6-29_84	PXL_20220629_140613729.dng	6
FieldData\Clifton Pictures\Individuals\6-29_84	PXL_20220629_140621196.dng	7
FieldData\Clifton Pictures\Individuals\6-29_84	PXL_20220629_140756288.dng	8
FieldData\Clifton Pictures\Individuals\6-29_84	PXL_20220629_140758117.dng	9
FieldData\Clifton Pictures\Individuals\6-29_84	PXL_20220629_141515164.dng	10
FieldData\Clifton Pictures\Individuals\6-29_84	PXL_20220629_141518242.dng	11
FieldData\Clifton Pictures\Individuals\6-29_84	PXL_20220629_141536005.dng	12
FieldData\Clifton Pictures\Individuals\6-29_84	PXL_20220629_141539780.dng	13
FieldData\Clifton Pictures\Individuals\6-29_84	PXL_20220629_141547084.dng	14
FieldData\Clifton Pictures\Individuals\6-29_84	PXL_20220629_141548643.dng	15
FieldData\Clifton Pictures\Individuals\6-29_84	PXL_20220629_141600778.dng	16
FieldData\Clifton Pictures\Individuals\6-29_84	PXL_20220629_141611976.dng	17
FieldData\Clifton Pictures\Individuals\6-29_84	PXL_20220630_173014521.dng	18
FieldData\Clifton Pictures\Individuals\6-30_93	PXL_20220630_172716587.dng	19
FieldData\Clifton Pictures\Individuals\6-30_93	PXL_20220630_172719850.dng	20
FieldData\Clifton Pictures\Individuals\6-30_93	PXL_20220630_172915161.dng	21
FieldData\Clifton Pictures\Individuals\6-30_93	PXL_20220630_172927377.dng	22
FieldData\Clifton Pictures\Individuals\6-30_93	PXL_20220630_172936034.dng	23
FieldData\Clifton Pictures\Individuals\6-30_93	PXL_20220630_172937307.dng	24
FieldData\Clifton Pictures\Individuals\6-30_93	PXL_20220630_172952509.dng	25
FieldData\Clifton Pictures\Individuals\6-30_93	PXL_20220630_172954964.dng	26
FieldData\Clifton Pictures\Individuals\6-30_93	PXL_20220630_173012534.dng	27
FieldData\Clifton Pictures\Individuals\6-30_93	PXL_20220630_173014521.dng	28
FieldData\Clifton Pictures\Individuals\7-22_107	PXL_20220722_151704337.dng	29
FieldData\Clifton Pictures\Individuals\7-22_107	PXL_20220722_151705978.dng	30
FieldData\Clifton Pictures\Individuals\7-22_107	PXL_20220722_151810753.dng	31
FieldData\Clifton Pictures\Individuals\7-22_107	PXL_20220722_151813979.dng	32
FieldData\Clifton Pictures\Individuals\7-22_107	PXL_20220722_151833373.dng	33
FieldData\Clifton Pictures\Individuals\7-22_107	PXL_20220722_151834716.dng	34
FieldData\Clifton Pictures\Individuals\7-22_107	PXL_20220722_151848604.dng	35
FieldData\Clifton Pictures\Individuals\7-22_107	PXL_20220722_151849774.dng	36
FieldData\Clifton Pictures\Individuals\7-22_107	PXL_20220722_151912760.dng	37
FieldData\Clifton Pictures\Individuals\7-22_107	PXL_20220722_151914140.dng	38
FieldData\Clifton Pictures\Individuals\7-22_107	PXL_20220722_152044452.dng	39
FieldData\Clifton Pictures\Individuals\7-22_107	PXL_20220722_152053708.dng	40
FieldData\Clifton Pictures\Individuals\7-30_108	PXL_20220730_133021401.dng	41
FieldData\Clifton Pictures\Individuals\7-30_108	PXL_20220730_133023611.dng	42
FieldData\Clifton Pictures\Individuals\7-30_108	PXL_20220730_133127010.dng	43
FieldData\Clifton Pictures\Individuals\7-30_108	PXL_20220730_133130794.dng	44
FieldData\Clifton Pictures\Individuals\7-30_108	PXL_20220730_133158416.dng	45
FieldData\Clifton Pictures\Individuals\7-30_108	PXL_20220730_133206260.dng	46
FieldData\Clifton Pictures\Individuals\7-30_108	PXL_20220730_133224400.dng	47
FieldData\Clifton Pictures\Individuals\7-30_108	PXL_20220730_133225754.dng	48
FieldData\Clifton Pictures\Individuals\7-30_108	PXL_20220730_133246066.dng	49
FieldData\Clifton Pictures\Individuals\7-30_108	PXL_20220730_133251077.dng	50
FieldData\Clifton Pictures\Individuals\7-5_57	PXL_20220705_141610852.dng	51
FieldData\Clifton Pictures\Individuals\7-5_57	PXL_20220705_141614791.dng	52
FieldData\Clifton Pictures\Individuals\7-5_57	PXL_20220705_141656555.dng	53
FieldData\Clifton Pictures\Individuals\7-5_57	PXL_20220705_141700573.dng	54
FieldData\Clifton Pictures\Individuals\7-5_57	PXL_20220705_141707378.dng	55
FieldData\Clifton Pictures\Individuals\7-5_57	PXL_20220705_141709095.dng	56
FieldData\Clifton Pictures\Individuals\7-5_57	PXL_20220705_141717409.dng	57
FieldData\Clifton Pictures\Individuals\7-5_57	PXL_20220705_141718582.dng	58
FieldData\Clifton Pictures\Individuals\7-5_57	PXL_20220705_141729657.dng	59
FieldData\Clifton Pictures\Individuals\7-5_57	PXL_20220705_141732023.dng	60
FieldData\Clifton Pictures\Individuals\7-5_91	PXL_20220705_132452585.dng	61
FieldData\Clifton Pictures\Individuals\7-5_91	PXL_20220705_132457023.dng	62
FieldData\Clifton Pictures\Individuals\7-5_91	PXL_20220705_132746534.dng	63
FieldData\Clifton Pictures\Individuals\7-5_91	PXL_20220705_132750397.dng	64
FieldData\Clifton Pictures\Individuals\7-5_91	PXL_20220705_132759984.dng	65
FieldData\Clifton Pictures\Individuals\7-5_91	PXL_20220705_132801136.dng	66
FieldData\Clifton Pictures\Individuals\7-5_91	PXL_20220705_132812988.dng	67
FieldData\Clifton Pictures\Individuals\7-5_91	PXL_20220705_132814102.dng	68
FieldData\Clifton Pictures\Individuals\7-5_91	PXL_20220705_132829108.dng	69
FieldData\Clifton Pictures\Individuals\7-5_91	PXL_20220705_132831205.dng	70
FieldData\Clifton Pictures\Individuals\7-5_94	PXL_20220705_161049910.dng	71
FieldData\Clifton Pictures\Individuals\7-5_94	PXL_20220705_161050891.dng	72
FieldData\Clifton Pictures\Individuals\7-5_94	PXL_20220705_161144184.dng	73
FieldData\Clifton Pictures\Individuals\7-5_94	PXL_20220705_161155546.dng	74
FieldData\Clifton Pictures\Individuals\7-5_94	PXL_20220705_161211122.dng	75
FieldData\Clifton Pictures\Individuals\7-5_94	PXL_20220705_161213166.dng	76
FieldData\Clifton Pictures\Individuals\7-5_94	PXL_20220705_161232944.dng	77
FieldData\Clifton Pictures\Individuals\7-5_94	PXL_20220705_161234920.dng	78
FieldData\Clifton Pictures\Individuals\7-5_94	PXL_20220705_161244949.dng	79
FieldData\Clifton Pictures\Individuals\7-5_94	PXL_20220705_161252650.dng	80
FieldData	Data.xlsx	81
FieldData\Mason Neck Pictures\Individuals\7-11_1	MN7-11_1_7.10p-mm.png	82
FieldData\Mason Neck Pictures\Individuals\7-11_1	PXL_20220711_124829532.dng	83
FieldData\Mason Neck Pictures\Individuals\7-11_1	PXL_20220711_124831077.dng	84
FieldData\Mason Neck Pictures\Individuals\7-11_1	PXL_20220711_125605964.dng	85
FieldData\Mason Neck Pictures\Individuals\7-11_1	PXL_20220711_125608870.dng	86
FieldData\Mason Neck Pictures\Individuals\7-11_1	PXL_20220711_125624652.dng	87
FieldData\Mason Neck Pictures\Individuals\7-11_1	PXL_20220711_125627361.dng	88
FieldData\Mason Neck Pictures\Individuals\7-11_1	PXL_20220711_125640970.dng	89
FieldData\Mason Neck Pictures\Individuals\7-11_1	PXL_20220711_125644438.dng	90
FieldData\Mason Neck Pictures\Individuals\7-11_1	PXL_20220711_125656778.dng	91
FieldData\Mason Neck Pictures\Individuals\7-11_1	PXL_20220711_125743980.dng	92
FieldData\Mason Neck Pictures\Individuals\7-11_1	PXL_20220711_125840730.dng	93
FieldData\Mason Neck Pictures\Individuals\7-11_1	PXL_20220711_125851725.dng	94
FieldData\Mason Neck Pictures\Individuals\7-11_2	MN7-11_2_5.87p-mm.png	95
FieldData\Mason Neck Pictures\Individuals\7-11_2\MatLab	MN7-11_2_5.87p-mm.png	96
FieldData\Mason Neck Pictures\Individuals\7-11_2	PXL_20220711_142111126.dng	97
FieldData\Mason Neck Pictures\Individuals\7-11_2	PXL_20220711_142113730.dng	98
FieldData\Mason Neck Pictures\Individuals\7-11_2	PXL_20220711_142845119.dng	99
FieldData\Mason Neck Pictures\Individuals\7-11_2	PXL_20220711_142909630.dng	100
FieldData\Mason Neck Pictures\Individuals\7-11_2	PXL_20220711_142939588.dng	101
FieldData\Mason Neck Pictures\Individuals\7-11_2	PXL_20220711_142941958.dng	102
FieldData\Mason Neck Pictures\Individuals\7-11_2	PXL_20220711_142955711.dng	103
FieldData\Mason Neck Pictures\Individuals\7-11_2	PXL_20220711_142957362.dng	104
FieldData\Mason Neck Pictures\Individuals\7-11_2	PXL_20220711_143018497.dng	105
FieldData\Mason Neck Pictures\Individuals\7-11_2	PXL_20220711_143019787.dng	106
FieldData\Mason Neck Pictures\Individuals\7-11_3	MN7-11_3_4.72p-mm.png	107
FieldData\Mason Neck Pictures\Individuals\7-11_3	PXL_20220711_153616694.dng	108
FieldData\Mason Neck Pictures\Individuals\7-11_3	PXL_20220711_153620017.dng	109
FieldData\Mason Neck Pictures\Individuals\7-11_3	PXL_20220711_153750558.dng	110
FieldData\Mason Neck Pictures\Individuals\7-11_3	PXL_20220711_153758230.dng	111
FieldData\Mason Neck Pictures\Individuals\7-11_3	PXL_20220711_153815925.dng	112
FieldData\Mason Neck Pictures\Individuals\7-11_3	PXL_20220711_153817981.dng	113
FieldData\Mason Neck Pictures\Individuals\7-11_3	PXL_20220711_153824608.dng	114
FieldData\Mason Neck Pictures\Individuals\7-11_3	PXL_20220711_153825863.dng	115
FieldData\Mason Neck Pictures\Individuals\7-11_3	PXL_20220711_153849225.dng	116
FieldData\Mason Neck Pictures\Individuals\7-11_3	PXL_20220711_153850210.dng	117
FieldData\Mason Neck Pictures\Individuals\7-11_4	MN7-11_4_5.92p-mm.png	118
FieldData\Mason Neck Pictures\Individuals\7-11_4\MatLab	MN7-11_4_5.92p-mm.png	119
FieldData\Mason Neck Pictures\Individuals\7-11_4	PXL_20220711_160228455.dng	120
FieldData\Mason Neck Pictures\Individuals\7-11_4	PXL_20220711_160229967.dng	121
FieldData\Mason Neck Pictures\Individuals\7-11_4	PXL_20220711_160349067.dng	122
FieldData\Mason Neck Pictures\Individuals\7-11_4	PXL_20220711_160350180.dng	123
FieldData\Mason Neck Pictures\Individuals\7-11_4	PXL_20220711_160407837.dng	124
FieldData\Mason Neck Pictures\Individuals\7-11_4	PXL_20220711_160409317.dng	125
FieldData\Mason Neck Pictures\Individuals\7-11_4	PXL_20220711_160419231.dng	126
FieldData\Mason Neck Pictures\Individuals\7-11_4	PXL_20220711_160420892.dng	127
FieldData\Mason Neck Pictures\Individuals\7-11_4	PXL_20220711_160435186.dng	128
FieldData\Mason Neck Pictures\Individuals\7-11_4	PXL_20220711_160436784.dng	129
FieldData\Mason Neck Pictures\Individuals\7-12_5	MN7-12_5_5.67p-mm.png	130
FieldData\Mason Neck Pictures\Individuals\7-12_5\MatLab	MN7-12_5_5.67p-mm.png	131
FieldData\Mason Neck Pictures\Individuals\7-12_5	PXL_20220712_154142065.dng	132
FieldData\Mason Neck Pictures\Individuals\7-12_5	PXL_20220712_154144737.dng	133
FieldData\Mason Neck Pictures\Individuals\7-12_5	PXL_20220712_154356192.dng	134
FieldData\Mason Neck Pictures\Individuals\7-12_5	PXL_20220712_154359359.dng	135
FieldData\Mason Neck Pictures\Individuals\7-12_5	PXL_20220712_154411970.dng	136
FieldData\Mason Neck Pictures\Individuals\7-12_5	PXL_20220712_154414098.dng	137
FieldData\Mason Neck Pictures\Individuals\7-12_5	PXL_20220712_154423152.dng	138
FieldData\Mason Neck Pictures\Individuals\7-12_5	PXL_20220712_154425548.dng	139
FieldData\Mason Neck Pictures\Individuals\7-12_5	PXL_20220712_154439305.dng	140
FieldData\Mason Neck Pictures\Individuals\7-12_5	PXL_20220712_154441401.dng	141
FieldData\Mason Neck Pictures\Individuals\7-13_6	MN7-13_6_4.51p-mm.png	142
FieldData\Mason Neck Pictures\Individuals\7-13_6\MatLab	MN7-13_6_4.51p-mm.png	143
FieldData\Mason Neck Pictures\Individuals\7-13_6	PXL_20220713_141442936.dng	144
FieldData\Mason Neck Pictures\Individuals\7-13_6	PXL_20220713_141450724.dng	145
FieldData\Mason Neck Pictures\Individuals\7-13_6	PXL_20220713_141639171.dng	146
FieldData\Mason Neck Pictures\Individuals\7-13_6	PXL_20220713_141640428.dng	147
FieldData\Mason Neck Pictures\Individuals\7-13_6	PXL_20220713_141714217.dng	148
FieldData\Mason Neck Pictures\Individuals\7-13_6	PXL_20220713_141720911.dng	149
FieldData\Mason Neck Pictures\Individuals\7-13_6	PXL_20220713_141736888.dng	150
FieldData\Mason Neck Pictures\Individuals\7-13_6	PXL_20220713_141739058.dng	151
FieldData\Mason Neck Pictures\Individuals\7-13_6	PXL_20220713_141755603.dng	152
FieldData\Mason Neck Pictures\Individuals\7-13_6	PXL_20220713_141802101.dng	153
FieldData\Mason Neck Pictures\Individuals\7-13_7	PXL_20220713_150031922.dng	154
FieldData\Mason Neck Pictures\Individuals\7-13_7	PXL_20220713_150034164.dng	155
FieldData\Mason Neck Pictures\Individuals\7-13_7	PXL_20220713_150228367.dng	156
FieldData\Mason Neck Pictures\Individuals\7-13_7	PXL_20220713_150230092.dng	157
FieldData\Mason Neck Pictures\Individuals\7-13_7	PXL_20220713_150314792.dng	158
FieldData\Mason Neck Pictures\Individuals\7-13_7	PXL_20220713_150316608.dng	159
FieldData\Mason Neck Pictures\Individuals\7-13_7	PXL_20220713_150447043.dng	160
FieldData\Mason Neck Pictures\Individuals\7-13_7	PXL_20220713_150503880.dng	161
FieldData\Mason Neck Pictures\Individuals\7-13_7	PXL_20220713_150602626.dng	162
FieldData\Mason Neck Pictures\Individuals\7-13_7	PXL_20220713_150604681.dng	163
FieldData\Mason Neck Pictures\Individuals\7-13_8	MN7-13_8_5.09p-mm.png	164
FieldData\Mason Neck Pictures\Individuals\7-13_8	PXL_20220713_152302626.dng	165
FieldData\Mason Neck Pictures\Individuals\7-13_8	PXL_20220713_152304421.dng	166
FieldData\Mason Neck Pictures\Individuals\7-13_8	PXL_20220713_152607219.dng	167
FieldData\Mason Neck Pictures\Individuals\7-13_8	PXL_20220713_152610938.dng	168
FieldData\Mason Neck Pictures\Individuals\7-13_8	PXL_20220713_152655574.dng	169
FieldData\Mason Neck Pictures\Individuals\7-13_8	PXL_20220713_152700624.dng	170
FieldData\Mason Neck Pictures\Individuals\7-13_8	PXL_20220713_152711751.dng	171
FieldData\Mason Neck Pictures\Individuals\7-13_8	PXL_20220713_152714210.dng	172
FieldData\Mason Neck Pictures\Individuals\7-13_8	PXL_20220713_152730946.dng	173
FieldData\Mason Neck Pictures\Individuals\7-13_8	PXL_20220713_152732196.dng	174
FieldData\Mason Neck Pictures\Individuals\7-13_9	MN7-13_9_4.41p-mm.png	175
FieldData\Mason Neck Pictures\Individuals\7-13_9	PXL_20220713_162313207.dng	176
FieldData\Mason Neck Pictures\Individuals\7-13_9	PXL_20220713_162314747.dng	177
FieldData\Mason Neck Pictures\Individuals\7-13_9	PXL_20220713_162522472.dng	178
FieldData\Mason Neck Pictures\Individuals\7-13_9	PXL_20220713_162526569.dng	179
FieldData\Mason Neck Pictures\Individuals\7-13_9	PXL_20220713_162616058.dng	180
FieldData\Mason Neck Pictures\Individuals\7-13_9	PXL_20220713_162617242.dng	181
FieldData\Mason Neck Pictures\Individuals\7-13_9	PXL_20220713_162624192.dng	182
FieldData\Mason Neck Pictures\Individuals\7-13_9	PXL_20220713_162625236.dng	183
FieldData\Mason Neck Pictures\Individuals\7-13_9	PXL_20220713_162637083.dng	184
FieldData\Mason Neck Pictures\Individuals\7-13_9	PXL_20220713_162643412.dng	185
FieldData\Mason Neck Pictures\Individuals\7-20_10	MN7-20_10_7.27p-mm.png	186
FieldData\Mason Neck Pictures\Individuals\7-20_10	PXL_20220720_134358844.dng	187
FieldData\Mason Neck Pictures\Individuals\7-20_10	PXL_20220720_134400446.dng	188
FieldData\Mason Neck Pictures\Individuals\7-20_10	PXL_20220720_134513666.dng	189
FieldData\Mason Neck Pictures\Individuals\7-20_10	PXL_20220720_134515727.dng	190
FieldData\Mason Neck Pictures\Individuals\7-20_10	PXL_20220720_134540875.dng	191
FieldData\Mason Neck Pictures\Individuals\7-20_10	PXL_20220720_134544069.dng	192
FieldData\Mason Neck Pictures\Individuals\7-20_10	PXL_20220720_134556482.dng	193
FieldData\Mason Neck Pictures\Individuals\7-20_10	PXL_20220720_134602194.dng	194
FieldData\Mason Neck Pictures\Individuals\7-20_10	PXL_20220720_134616766.dng	195
FieldData\Mason Neck Pictures\Individuals\7-20_10	PXL_20220720_134618170.dng	196
FieldData\Mason Neck Pictures\Individuals\7-20_11	MN7-20_11_7.59p-mm.png	197
FieldData\Mason Neck Pictures\Individuals\7-20_11	PXL_20220720_142411583.dng	198
FieldData\Mason Neck Pictures\Individuals\7-20_11	PXL_20220720_142419166.dng	199
FieldData\Mason Neck Pictures\Individuals\7-20_11	PXL_20220720_142535008.dng	200
FieldData\Mason Neck Pictures\Individuals\7-20_11	PXL_20220720_142536505.dng	201
FieldData\Mason Neck Pictures\Individuals\7-20_11	PXL_20220720_142552533.dng	202
FieldData\Mason Neck Pictures\Individuals\7-20_11	PXL_20220720_142555838.dng	203
FieldData\Mason Neck Pictures\Individuals\7-20_11	PXL_20220720_142612361.dng	204
FieldData\Mason Neck Pictures\Individuals\7-20_11	PXL_20220720_142614410.dng	205
FieldData\Mason Neck Pictures\Individuals\7-20_11	PXL_20220720_142636814.dng	206
FieldData\Mason Neck Pictures\Individuals\7-20_11	PXL_20220720_142638729.dng	207
FieldData\Mason Neck Pictures\Individuals\7-20_12	MN7-20_12_6.48p-mm.png	208
FieldData\Mason Neck Pictures\Individuals\7-20_12	PXL_20220720_152834289.dng	209
FieldData\Mason Neck Pictures\Individuals\7-20_12	PXL_20220720_152835072.dng	210
FieldData\Mason Neck Pictures\Individuals\7-20_12	PXL_20220720_152922806.dng	211
FieldData\Mason Neck Pictures\Individuals\7-20_12	PXL_20220720_152925210.dng	212
FieldData\Mason Neck Pictures\Individuals\7-20_12	PXL_20220720_152937354.dng	213
FieldData\Mason Neck Pictures\Individuals\7-20_12	PXL_20220720_152940331.dng	214
FieldData\Mason Neck Pictures\Individuals\7-20_12	PXL_20220720_153007377.dng	215
FieldData\Mason Neck Pictures\Individuals\7-20_12	PXL_20220720_153008393.dng	216
FieldData\Mason Neck Pictures\Individuals\7-20_12	PXL_20220720_153020707.dng	217
FieldData\Mason Neck Pictures\Individuals\7-20_12	PXL_20220720_153024766.dng	218
FieldData\Mason Neck Pictures\Individuals\7-20_13	MN7-20_13_8.07p-mm.png	219
FieldData\Mason Neck Pictures\Individuals\7-20_13	PXL_20220720_160232008.dng	220
FieldData\Mason Neck Pictures\Individuals\7-20_13	PXL_20220720_160233720.dng	221
FieldData\Mason Neck Pictures\Individuals\7-20_13	PXL_20220720_160314992.dng	222
FieldData\Mason Neck Pictures\Individuals\7-20_13	PXL_20220720_160317123.dng	223
FieldData\Mason Neck Pictures\Individuals\7-20_13	PXL_20220720_160336718.dng	224
FieldData\Mason Neck Pictures\Individuals\7-20_13	PXL_20220720_160341864.dng	225
FieldData\Mason Neck Pictures\Individuals\7-20_13	PXL_20220720_160410116.dng	226
FieldData\Mason Neck Pictures\Individuals\7-20_13	PXL_20220720_160411747.dng	227
FieldData\Mason Neck Pictures\Individuals\7-20_13	PXL_20220720_160432348.dng	228
FieldData\Mason Neck Pictures\Individuals\7-20_13	PXL_20220720_160433340.dng	229
FieldData\Mason Neck Pictures\Individuals\7-21_14	MN7-21_14_5.31p-mm.png	230
FieldData\Mason Neck Pictures\Individuals\7-21_14	PXL_20220721_155821966.dng	231
FieldData\Mason Neck Pictures\Individuals\7-21_14	PXL_20220721_155822816.dng	232
FieldData\Mason Neck Pictures\Individuals\7-21_14	PXL_20220721_155905227.dng	233
FieldData\Mason Neck Pictures\Individuals\7-21_14	PXL_20220721_155910576.dng	234
FieldData\Mason Neck Pictures\Individuals\7-21_14	PXL_20220721_155929373.dng	235
FieldData\Mason Neck Pictures\Individuals\7-21_14	PXL_20220721_155931455.dng	236
FieldData\Mason Neck Pictures\Individuals\7-21_14	PXL_20220721_155940491.dng	237
FieldData\Mason Neck Pictures\Individuals\7-21_14	PXL_20220721_155942900.dng	238
FieldData\Mason Neck Pictures\Individuals\7-21_14	PXL_20220721_155952022.dng	239
FieldData\Mason Neck Pictures\Individuals\7-21_14	PXL_20220721_155953541.dng	240
FieldData\Mason Neck Pictures\Individuals\7-21_15	MN7-21_15_5.17p-mm.png	241
FieldData\Mason Neck Pictures\Individuals\7-21_15	PXL_20220721_144054139.dng	242
FieldData\Mason Neck Pictures\Individuals\7-21_15	PXL_20220721_144100479.dng	243
FieldData\Mason Neck Pictures\Individuals\7-21_15	PXL_20220721_144439614.dng	244
FieldData\Mason Neck Pictures\Individuals\7-21_15	PXL_20220721_144441076.dng	245
FieldData\Mason Neck Pictures\Individuals\7-21_15	PXL_20220721_144457811.dng	246
FieldData\Mason Neck Pictures\Individuals\7-21_15	PXL_20220721_144459439.dng	247
FieldData\Mason Neck Pictures\Individuals\7-21_15	PXL_20220721_144513431.dng	248
FieldData\Mason Neck Pictures\Individuals\7-21_15	PXL_20220721_144514369.dng	249
FieldData\Mason Neck Pictures\Individuals\7-21_15	PXL_20220721_144530780.dng	250
FieldData\Mason Neck Pictures\Individuals\7-21_15	PXL_20220721_144533514.dng	251
FieldData\Mason Neck Pictures\Individuals\7-21_21x	MN7-21_21x_4.56p-mm.png	252
FieldData\Mason Neck Pictures\Individuals\7-21_21x	PXL_20220721_143458920.dng	253
FieldData\Mason Neck Pictures\Individuals\7-21_21x	PXL_20220721_143459849.dng	254
FieldData\Mason Neck Pictures\Individuals\7-21_21x	PXL_20220721_143624294.dng	255
FieldData\Mason Neck Pictures\Individuals\7-21_21x	PXL_20220721_143625538.dng	256
FieldData\Mason Neck Pictures\Individuals\7-21_21x	PXL_20220721_143653987.dng	257
FieldData\Mason Neck Pictures\Individuals\7-21_21x	PXL_20220721_143655351.dng	258
FieldData\Mason Neck Pictures\Individuals\7-21_21x	PXL_20220721_143712539.dng	259
FieldData\Mason Neck Pictures\Individuals\7-21_21x	PXL_20220721_143714159.dng	260
FieldData\Mason Neck Pictures\Individuals\7-21_21x	PXL_20220721_143729171.dng	261
FieldData\Mason Neck Pictures\Individuals\7-21_21x	PXL_20220721_143733722.dng	262
FieldData\Mason Neck Pictures\Individuals\7-25_16	MN7-25_16_9.04p-mm.png	263
FieldData\Mason Neck Pictures\Individuals\7-25_16	PXL_20220725_135537694.dng	264
FieldData\Mason Neck Pictures\Individuals\7-25_16	PXL_20220725_135538957.dng	265
FieldData\Mason Neck Pictures\Individuals\7-25_16	PXL_20220725_135656512.dng	266
FieldData\Mason Neck Pictures\Individuals\7-25_16	PXL_20220725_135658563.dng	267
FieldData\Mason Neck Pictures\Individuals\7-25_16	PXL_20220725_135711237.dng	268
FieldData\Mason Neck Pictures\Individuals\7-25_16	PXL_20220725_135714159.dng	269
FieldData\Mason Neck Pictures\Individuals\7-25_16	PXL_20220725_135748709.dng	270
FieldData\Mason Neck Pictures\Individuals\7-25_16	PXL_20220725_135750898.dng	271
FieldData\Mason Neck Pictures\Individuals\7-25_16	PXL_20220725_135847946.dng	272
FieldData\Mason Neck Pictures\Individuals\7-25_16	PXL_20220725_135853280.dng	273
FieldData\Mason Neck Pictures\Individuals\7-25_440x	MN7-25_440x_7.61p-mm.png	274
FieldData\Mason Neck Pictures\Individuals\7-25_440x	PXL_20220725_132646976.dng	275
FieldData\Mason Neck Pictures\Individuals\7-25_440x	PXL_20220725_132648441.dng	276
FieldData\Mason Neck Pictures\Individuals\7-25_440x	PXL_20220725_132815424.dng	277
FieldData\Mason Neck Pictures\Individuals\7-25_440x	PXL_20220725_132820282.dng	278
FieldData\Mason Neck Pictures\Individuals\7-25_440x	PXL_20220725_132835974.dng	279
FieldData\Mason Neck Pictures\Individuals\7-25_440x	PXL_20220725_132838452.dng	280
FieldData\Mason Neck Pictures\Individuals\7-25_440x	PXL_20220725_132850236.dng	281
FieldData\Mason Neck Pictures\Individuals\7-25_440x	PXL_20220725_132851865.dng	282
FieldData\Mason Neck Pictures\Individuals\7-25_440x	PXL_20220725_132909401.dng	283
FieldData\Mason Neck Pictures\Individuals\7-25_440x	PXL_20220725_132912720.dng	284
FieldData\Mason Neck Pictures\Individuals\7-27_11x	MN7-27_11x_4.88p-mm.png	285
FieldData\Mason Neck Pictures\Individuals\7-27_11x	PXL_20220727_154351819.dng	286
FieldData\Mason Neck Pictures\Individuals\7-27_11x	PXL_20220727_154354404.dng	287
FieldData\Mason Neck Pictures\Individuals\7-27_11x	PXL_20220727_154516191.dng	288
FieldData\Mason Neck Pictures\Individuals\7-27_11x	PXL_20220727_154518966.dng	289
FieldData\Mason Neck Pictures\Individuals\7-27_11x	PXL_20220727_154543858.dng	290
FieldData\Mason Neck Pictures\Individuals\7-27_11x	PXL_20220727_154546904.dng	291
FieldData\Mason Neck Pictures\Individuals\7-27_11x	PXL_20220727_154618073.dng	292
FieldData\Mason Neck Pictures\Individuals\7-27_11x	PXL_20220727_154619669.dng	293
FieldData\Mason Neck Pictures\Individuals\7-27_11x	PXL_20220727_154705913.dng	294
FieldData\Mason Neck Pictures\Individuals\7-27_11x	PXL_20220727_154709524.dng	295
FieldData\Mason Neck Pictures\Individuals\8-2_17	MN8-2_17_5.90p-mm.png	296
FieldData\Mason Neck Pictures\Individuals\8-2_17	PXL_20220802_150041767.dng	297
FieldData\Mason Neck Pictures\Individuals\8-2_17	PXL_20220802_150042524.dng	298
FieldData\Mason Neck Pictures\Individuals\8-2_17	PXL_20220802_150227898.dng	299
FieldData\Mason Neck Pictures\Individuals\8-2_17	PXL_20220802_150229540.dng	300
FieldData\Mason Neck Pictures\Individuals\8-2_17	PXL_20220802_150242477.dng	301
FieldData\Mason Neck Pictures\Individuals\8-2_17	PXL_20220802_150247850.dng	302
FieldData\Mason Neck Pictures\Individuals\8-2_17	PXL_20220802_150304188.dng	303
FieldData\Mason Neck Pictures\Individuals\8-2_17	PXL_20220802_150306205.dng	304
FieldData\Modified Images	CI6-24_71_8.42p-mm_col.png	305
FieldData\Modified Images	CI6-29_84_5.11p-mm_col.png	306
FieldData\Modified Images	CI6-30_93_3.80p-mm_col.png	307
FieldData\Modified Images	CI7-05_57_7.42p-mm_col.png	308
FieldData\Modified Images	CI7-05_91_7.50p-mm_col.png	309
FieldData\Modified Images	CI7-22_107_7.17p-mm_col.png	310
FieldData\Modified Images	CI7-30_108_6.78p-mm_col.png	311
FieldData\Modified Images	CI7-5_94_4.91p-mm_col.png	312
FieldData\Modified Images	MN7-11_1_7.10p-mm_col.png	313
FieldData\Modified Images	MN7-11_2_5.87p-mm_col.png	314
FieldData\Modified Images	MN7-11_3_4.72p-mm_col.png	315
FieldData\Modified Images	MN7-11_4_5.92p-mm_col.png	316
FieldData\Modified Images	MN7-12_5_5.67p-mm_col.png	317
FieldData\Modified Images	MN7-13_6_4.51p-mm_col.png	318
FieldData\Modified Images	MN7-13_8_5.09p-mm_col.png	319
FieldData\Modified Images	MN7-13_9_4.41p-mm_col.png	320
FieldData\Modified Images	MN7-20_10_7.27p-mm_col.png	321
FieldData\Modified Images	MN7-20_11_7.59p-mm_col.png	322
FieldData\Modified Images	MN7-20_12_6.48p-mm_col.png	323
FieldData\Modified Images	MN7-20_13_8.07p-mm_col.png	324
FieldData\Modified Images	MN7-21_14_5.31p-mm_col.png	325
FieldData\Modified Images	MN7-21_15_5.17p-mm_col.png	326
FieldData\Modified Images	MN7-21_21x_4.56p-mm_col.png	327
FieldData\Modified Images	MN7-25_16_9.04p-mm_col.png	328
FieldData\Modified Images	MN7-25_440x_7.61p-mm_col.png	329
FieldData\Modified Images	MN7-27_11x_4.88p-mm_col.png	330
FieldData\Modified Images	MN7_13_7_6.12p-mm_col.png	331
FieldData\Modified Images	MN8-2_17_5.90p-mm_col.png	332
FieldData\ModifiedImagesScripts	CI6-24_71_8.42p-mm_col.png	333
FieldData\ModifiedImagesScripts	CI6-29_84_5.11p-mm_col.png	334
FieldData\ModifiedImagesScripts	CI6-30_93_3.80p-mm_col.png	335
FieldData\ModifiedImagesScripts	CI7-05_57_7.42p-mm_col.png	336
FieldData\ModifiedImagesScripts	CI7-05_91_7.50p-mm_col.png	337
FieldData\ModifiedImagesScripts	CI7-05_94_4.91p-mm_col.png	338
FieldData\ModifiedImagesScripts	CI7-22_h7_7.17p-mm_col.png	339
FieldData\ModifiedImagesScripts	CI7-30_h8_6.78p-mm_col.png	340
FieldData\ModifiedImagesScripts	MN7-11_01_7.10p-mm_col.png	341
FieldData\ModifiedImagesScripts	MN7-11_02_5.87p-mm_col.png	342
FieldData\ModifiedImagesScripts	MN7-11_03_4.72p-mm_col.png	343
FieldData\ModifiedImagesScripts	MN7-11_04_5.92p-mm_col.png	344
FieldData\ModifiedImagesScripts	MN7-12_05_5.67p-mm_col.png	345
FieldData\ModifiedImagesScripts	MN7-13_06_4.51p-mm_col.png	346
FieldData\ModifiedImagesScripts	MN7-13_08_5.09p-mm_col.png	347
FieldData\ModifiedImagesScripts	MN7-13_09_4.41p-mm_col.png	348
FieldData\ModifiedImagesScripts	MN7-20_10_7.27p-mm_col.png	349
FieldData\ModifiedImagesScripts	MN7-20_11_7.59p-mm_col.png	350
FieldData\ModifiedImagesScripts	MN7-20_12_6.48p-mm_col.png	351
FieldData\ModifiedImagesScripts	MN7-20_13_8.07p-mm_col.png	352
FieldData\ModifiedImagesScripts	MN7-21_14_5.31p-mm_col.png	353
FieldData\ModifiedImagesScripts	MN7-21_15_5.17p-mm_col.png	354
FieldData\ModifiedImagesScripts	MN7-21_21_4.56p-mm_col.png	355
FieldData\ModifiedImagesScripts	MN7-25_16_9.04p-mm_col.png	356
FieldData\ModifiedImagesScripts	MN7-25_44_7.61p-mm_col.png	357
FieldData\ModifiedImagesScripts	MN7-27_11_4.88p-mm_col.png	358
FieldData\ModifiedImagesScripts	MN7_13_07_6.12p-mm_col.png	359
FieldData\ModifiedImagesScripts	MN8-02_17_5.90p-mm_col.png	360
FieldData\ModifiedImagesScripts	check_scute_IDs.m	361
FieldData\ModifiedImagesScripts	display_by_scute.m	362
FieldData\ModifiedImagesScripts	find_scute_pattern_Nov22.m	363
FieldData\ModifiedImagesScripts	find_scute_region.m	364
FieldData\ModifiedImagesScripts	make_data_list.m	365
FieldData\ModifiedImagesScripts	scute10_5by5.jpg	366
FieldData\ModifiedImagesScripts	scute1_5by5.jpg	367
FieldData\ModifiedImagesScripts	scute1_6by4.jpg	368
FieldData\ModifiedImagesScripts	scute2_5by5.jpg	369
FieldData\ModifiedImagesScripts	scute3_5by5.jpg	370
FieldData\ModifiedImagesScripts	scute4_5by5.jpg	371
FieldData\ModifiedImagesScripts	scute5_5by5.jpg	372
FieldData\ModifiedImagesScripts	scute6_5by5.jpg	373
FieldData\ModifiedImagesScripts	scute7_5by5.jpg	374
FieldData\ModifiedImagesScripts	scute8_5by5.jpg	375
FieldData\ModifiedImagesScripts	scute9_5by5.jpg	376
FieldData\ModifiedImagesScripts	statistics_by_scute.m	377
FieldData\ModifiedImagesScripts	statistics_by_turtle_and_scute.m	378
FieldData\ModifiedImagesScripts	turtle_data.csv	379
FieldData\Smithsonian Pictures	BoxTurtleSmithsonian.xlsx	380
FieldData\Smithsonian Pictures\Central VA (near Richmond)\Adult\324296	PXL_20230207_185849679.dng	381
FieldData\Smithsonian Pictures\Central VA (near Richmond)\Adult\324296	PXL_20230207_185854089.dng	382
FieldData\Smithsonian Pictures\Central VA (near Richmond)\Adult\324296	PXL_20230207_185855725.dng	383
FieldData\Smithsonian Pictures\Central VA (near Richmond)\Adult\324296	PXL_20230207_185908816.dng	384
FieldData\Smithsonian Pictures\Central VA (near Richmond)\Adult\324296	PXL_20230207_185909847.dng	385
FieldData\Smithsonian Pictures\Central VA (near Richmond)\Adult\324296	PXL_20230207_185921044.dng	386
FieldData\Smithsonian Pictures\Central VA (near Richmond)\Adult\324296	PXL_20230207_185922031.dng	387
FieldData\Smithsonian Pictures\Central VA (near Richmond)\Adult\324296	PXL_20230207_185932384.dng	388
FieldData\Smithsonian Pictures\Central VA (near Richmond)\Adult\324296	PXL_20230207_185933461.dng	389
FieldData\Smithsonian Pictures\Central VA (near Richmond)\Adult\324296	PXL_20230207_185942263.dng	390
FieldData\Smithsonian Pictures\Central VA (near Richmond)\Adult\324296	PXL_20230207_185943008.dng	391
FieldData\Smithsonian Pictures\Central VA (near Richmond)\Adult\497193	PXL_20230208_195917741.dng	392
FieldData\Smithsonian Pictures\Central VA (near Richmond)\Adult\497193	PXL_20230208_195920766.dng	393
FieldData\Smithsonian Pictures\Central VA (near Richmond)\Adult\497193	PXL_20230208_195923511.dng	394
FieldData\Smithsonian Pictures\Central VA (near Richmond)\Adult\497193	PXL_20230208_195936016.dng	395
FieldData\Smithsonian Pictures\Central VA (near Richmond)\Adult\497193	PXL_20230208_195938037.dng	396
FieldData\Smithsonian Pictures\Central VA (near Richmond)\Adult\497193	PXL_20230208_195949412.dng	397
FieldData\Smithsonian Pictures\Central VA (near Richmond)\Adult\497193	PXL_20230208_195950248.dng	398
FieldData\Smithsonian Pictures\Central VA (near Richmond)\Adult\497193	PXL_20230208_195957780.dng	399
FieldData\Smithsonian Pictures\Central VA (near Richmond)\Adult\497193	PXL_20230208_195959400.dng	400
FieldData\Smithsonian Pictures\Central VA (near Richmond)\Adult\497193	PXL_20230208_200007589.dng	401
FieldData\Smithsonian Pictures\Central VA (near Richmond)\Adult\497193	PXL_20230208_200009208.dng	402
FieldData\Smithsonian Pictures\Central VA (near Richmond)\Adult\497202	PXL_20230208_193158011.dng	403
FieldData\Smithsonian Pictures\Central VA (near Richmond)\Adult\497202	PXL_20230208_193203034.dng	404
FieldData\Smithsonian Pictures\Central VA (near Richmond)\Adult\497202	PXL_20230208_193206182.dng	405
FieldData\Smithsonian Pictures\Central VA (near Richmond)\Adult\497202	PXL_20230208_193222771.dng	406
FieldData\Smithsonian Pictures\Central VA (near Richmond)\Adult\497202	PXL_20230208_193225142.dng	407
FieldData\Smithsonian Pictures\Central VA (near Richmond)\Adult\497202	PXL_20230208_193236673.dng	408
FieldData\Smithsonian Pictures\Central VA (near Richmond)\Adult\497202	PXL_20230208_193237580.dng	409
FieldData\Smithsonian Pictures\Central VA (near Richmond)\Adult\497202	PXL_20230208_193246637.dng	410
FieldData\Smithsonian Pictures\Central VA (near Richmond)\Adult\497202	PXL_20230208_193249322.dng	411
FieldData\Smithsonian Pictures\Central VA (near Richmond)\Adult\497202	PXL_20230208_193254542.dng	412
FieldData\Smithsonian Pictures\Central VA (near Richmond)\Adult\497202	PXL_20230208_193257709.dng	413
FieldData\Smithsonian Pictures\Central VA (near Richmond)\Adult\497203	PXL_20230208_193429993.dng	414
FieldData\Smithsonian Pictures\Central VA (near Richmond)\Adult\497203	PXL_20230208_193434814.dng	415
FieldData\Smithsonian Pictures\Central VA (near Richmond)\Adult\497203	PXL_20230208_193437106.dng	416
FieldData\Smithsonian Pictures\Central VA (near Richmond)\Adult\497203	PXL_20230208_193447768.dng	417
FieldData\Smithsonian Pictures\Central VA (near Richmond)\Adult\497203	PXL_20230208_193448864.dng	418
FieldData\Smithsonian Pictures\Central VA (near Richmond)\Adult\497203	PXL_20230208_193501401.dng	419
FieldData\Smithsonian Pictures\Central VA (near Richmond)\Adult\497203	PXL_20230208_193502173.dng	420
FieldData\Smithsonian Pictures\Central VA (near Richmond)\Adult\497203	PXL_20230208_193511700.dng	421
FieldData\Smithsonian Pictures\Central VA (near Richmond)\Adult\497203	PXL_20230208_193512542.dng	422
FieldData\Smithsonian Pictures\Central VA (near Richmond)\Adult\497203	PXL_20230208_193523599.dng	423
FieldData\Smithsonian Pictures\Central VA (near Richmond)\Adult\497203	PXL_20230208_193524925.dng	424
FieldData\Smithsonian Pictures\Central VA (near Richmond)\Adult\497243	PXL_20230208_192438763.dng	425
FieldData\Smithsonian Pictures\Central VA (near Richmond)\Adult\497243	PXL_20230208_192442434.dng	426
FieldData\Smithsonian Pictures\Central VA (near Richmond)\Adult\497243	PXL_20230208_192444319.dng	427
FieldData\Smithsonian Pictures\Central VA (near Richmond)\Adult\497243	PXL_20230208_192458804.dng	428
FieldData\Smithsonian Pictures\Central VA (near Richmond)\Adult\497243	PXL_20230208_192459625.dng	429
FieldData\Smithsonian Pictures\Central VA (near Richmond)\Adult\497243	PXL_20230208_192513393.dng	430
FieldData\Smithsonian Pictures\Central VA (near Richmond)\Adult\497243	PXL_20230208_192514050.dng	431
FieldData\Smithsonian Pictures\Central VA (near Richmond)\Adult\497243	PXL_20230208_192524370.dng	432
FieldData\Smithsonian Pictures\Central VA (near Richmond)\Adult\497243	PXL_20230208_192525187.dng	433
FieldData\Smithsonian Pictures\Central VA (near Richmond)\Adult\497243	PXL_20230208_192534585.dng	434
FieldData\Smithsonian Pictures\Central VA (near Richmond)\Adult\497243	PXL_20230208_192536156.dng	435
FieldData\Smithsonian Pictures\Central VA (near Richmond)\Adult\497248	PXL_20230208_190109360.dng	436
FieldData\Smithsonian Pictures\Central VA (near Richmond)\Adult\497248	PXL_20230208_190113567.dng	437
FieldData\Smithsonian Pictures\Central VA (near Richmond)\Adult\497248	PXL_20230208_190115874.dng	438
FieldData\Smithsonian Pictures\Central VA (near Richmond)\Adult\497248	PXL_20230208_190134402.dng	439
FieldData\Smithsonian Pictures\Central VA (near Richmond)\Adult\497248	PXL_20230208_190135060.dng	440
FieldData\Smithsonian Pictures\Central VA (near Richmond)\Adult\497248	PXL_20230208_190144901.dng	441
FieldData\Smithsonian Pictures\Central VA (near Richmond)\Adult\497248	PXL_20230208_190145547.dng	442
FieldData\Smithsonian Pictures\Central VA (near Richmond)\Adult\497248	PXL_20230208_190157371.dng	443
FieldData\Smithsonian Pictures\Central VA (near Richmond)\Adult\497248	PXL_20230208_190158053.dng	444
FieldData\Smithsonian Pictures\Central VA (near Richmond)\Adult\497248	PXL_20230208_190206314.dng	445
FieldData\Smithsonian Pictures\Central VA (near Richmond)\Adult\497248	PXL_20230208_190208643.dng	446
FieldData\Smithsonian Pictures\Central VA (near Richmond)\Adult\497272	PXL_20230208_204446417.dng	447
FieldData\Smithsonian Pictures\Central VA (near Richmond)\Adult\497272	PXL_20230208_204448398.dng	448
FieldData\Smithsonian Pictures\Central VA (near Richmond)\Adult\497272	PXL_20230208_204449931.dng	449
FieldData\Smithsonian Pictures\Central VA (near Richmond)\Adult\497272	PXL_20230208_204503566.dng	450
FieldData\Smithsonian Pictures\Central VA (near Richmond)\Adult\497272	PXL_20230208_204504513.dng	451
FieldData\Smithsonian Pictures\Central VA (near Richmond)\Adult\497272	PXL_20230208_204514005.dng	452
FieldData\Smithsonian Pictures\Central VA (near Richmond)\Adult\497272	PXL_20230208_204514951.dng	453
FieldData\Smithsonian Pictures\Central VA (near Richmond)\Adult\497272	PXL_20230208_204525269.dng	454
FieldData\Smithsonian Pictures\Central VA (near Richmond)\Adult\497272	PXL_20230208_204525989.dng	455
FieldData\Smithsonian Pictures\Central VA (near Richmond)\Adult\497272	PXL_20230208_204537496.dng	456
FieldData\Smithsonian Pictures\Central VA (near Richmond)\Adult\497272	PXL_20230208_204538729.dng	457
FieldData\Smithsonian Pictures\Central VA (near Richmond)\Adult\497276	PXL_20230208_204059328.dng	458
FieldData\Smithsonian Pictures\Central VA (near Richmond)\Adult\497276	PXL_20230208_204102188.dng	459
FieldData\Smithsonian Pictures\Central VA (near Richmond)\Adult\497276	PXL_20230208_204105029.dng	460
FieldData\Smithsonian Pictures\Central VA (near Richmond)\Adult\497276	PXL_20230208_204118854.dng	461
FieldData\Smithsonian Pictures\Central VA (near Richmond)\Adult\497276	PXL_20230208_204119611.dng	462
FieldData\Smithsonian Pictures\Central VA (near Richmond)\Adult\497276	PXL_20230208_204129810.dng	463
FieldData\Smithsonian Pictures\Central VA (near Richmond)\Adult\497276	PXL_20230208_204130902.dng	464
FieldData\Smithsonian Pictures\Central VA (near Richmond)\Adult\497276	PXL_20230208_204142332.dng	465
FieldData\Smithsonian Pictures\Central VA (near Richmond)\Adult\497276	PXL_20230208_204143649.dng	466
FieldData\Smithsonian Pictures\Central VA (near Richmond)\Adult\497276	PXL_20230208_204155170.dng	467
FieldData\Smithsonian Pictures\Central VA (near Richmond)\Adult\497276	PXL_20230208_204155871.dng	468
FieldData\Smithsonian Pictures\Central VA (near Richmond)\Adult\497302	PXL_20230208_200729853.dng	469
FieldData\Smithsonian Pictures\Central VA (near Richmond)\Adult\497302	PXL_20230208_200733425.dng	470
FieldData\Smithsonian Pictures\Central VA (near Richmond)\Adult\497302	PXL_20230208_200736613.dng	471
FieldData\Smithsonian Pictures\Central VA (near Richmond)\Adult\497302	PXL_20230208_200751709.dng	472
FieldData\Smithsonian Pictures\Central VA (near Richmond)\Adult\497302	PXL_20230208_200752702.dng	473
FieldData\Smithsonian Pictures\Central VA (near Richmond)\Adult\497302	PXL_20230208_200803659.dng	474
FieldData\Smithsonian Pictures\Central VA (near Richmond)\Adult\497302	PXL_20230208_200804673.dng	475
FieldData\Smithsonian Pictures\Central VA (near Richmond)\Adult\497302	PXL_20230208_200817408.dng	476
FieldData\Smithsonian Pictures\Central VA (near Richmond)\Adult\497302	PXL_20230208_200818240.dng	477
FieldData\Smithsonian Pictures\Central VA (near Richmond)\Adult\497302	PXL_20230208_200826898.dng	478
FieldData\Smithsonian Pictures\Central VA (near Richmond)\Adult\497302	PXL_20230208_200828043.dng	479
FieldData\Smithsonian Pictures\Central VA (near Richmond)\Adult\519611	PXL_20230210_190637094.dng	480
FieldData\Smithsonian Pictures\Central VA (near Richmond)\Adult\519611	PXL_20230210_190640639.dng	481
FieldData\Smithsonian Pictures\Central VA (near Richmond)\Adult\519611	PXL_20230210_190643152.dng	482
FieldData\Smithsonian Pictures\Central VA (near Richmond)\Adult\519611	PXL_20230210_190655613.dng	483
FieldData\Smithsonian Pictures\Central VA (near Richmond)\Adult\519611	PXL_20230210_190656263.dng	484
FieldData\Smithsonian Pictures\Central VA (near Richmond)\Adult\519611	PXL_20230210_190726747.dng	485
FieldData\Smithsonian Pictures\Central VA (near Richmond)\Adult\519611	PXL_20230210_190727570.dng	486
FieldData\Smithsonian Pictures\Central VA (near Richmond)\Adult\519611	PXL_20230210_190748696.dng	487
FieldData\Smithsonian Pictures\Central VA (near Richmond)\Adult\519611	PXL_20230210_190749441.dng	488
FieldData\Smithsonian Pictures\Central VA (near Richmond)\Adult\519611	PXL_20230210_190756503.dng	489
FieldData\Smithsonian Pictures\Central VA (near Richmond)\Adult\519611	PXL_20230210_190757457.dng	490
FieldData\Smithsonian Pictures\Central VA (near Richmond)\Hatchling\22289	PXL_20230201_193501593.dng	491
FieldData\Smithsonian Pictures\Central VA (near Richmond)\Hatchling\22289	PXL_20230201_193503451.dng	492
FieldData\Smithsonian Pictures\Central VA (near Richmond)\Hatchling\22289	PXL_20230201_193519911.dng	493
FieldData\Smithsonian Pictures\Central VA (near Richmond)\Hatchling\22289	PXL_20230201_193520530.dng	494
FieldData\Smithsonian Pictures\Central VA (near Richmond)\Hatchling\22289	PXL_20230201_193536195.dng	495
FieldData\Smithsonian Pictures\Central VA (near Richmond)\Hatchling\22289	PXL_20230201_193537003.dng	496
FieldData\Smithsonian Pictures\Central VA (near Richmond)\Hatchling\22289	PXL_20230201_193548428.dng	497
FieldData\Smithsonian Pictures\Central VA (near Richmond)\Hatchling\22289	PXL_20230201_193549122.dng	498
FieldData\Smithsonian Pictures\Central VA (near Richmond)\Hatchling\22289	PXL_20230201_193607243.dng	499
FieldData\Smithsonian Pictures\Central VA (near Richmond)\Hatchling\22289	PXL_20230201_193608347.dng	500
FieldData\Smithsonian Pictures\Central VA (near Richmond)\Hatchling\519634	PXL_20230210_193254648.dng	501
FieldData\Smithsonian Pictures\Central VA (near Richmond)\Hatchling\519634	PXL_20230210_193256903.dng	502
FieldData\Smithsonian Pictures\Central VA (near Richmond)\Hatchling\519634	PXL_20230210_193258827.dng	503
FieldData\Smithsonian Pictures\Central VA (near Richmond)\Hatchling\519634	PXL_20230210_193312091.dng	504
FieldData\Smithsonian Pictures\Central VA (near Richmond)\Hatchling\519634	PXL_20230210_193312760.dng	505
FieldData\Smithsonian Pictures\Central VA (near Richmond)\Hatchling\519634	PXL_20230210_193323708.dng	506
FieldData\Smithsonian Pictures\Central VA (near Richmond)\Hatchling\519634	PXL_20230210_193324312.dng	507
FieldData\Smithsonian Pictures\Central VA (near Richmond)\Hatchling\519634	PXL_20230210_193338859.dng	508
FieldData\Smithsonian Pictures\Central VA (near Richmond)\Hatchling\519634	PXL_20230210_193339874.dng	509
FieldData\Smithsonian Pictures\Central VA (near Richmond)\Hatchling\519634	PXL_20230210_193353449.dng	510
FieldData\Smithsonian Pictures\Central VA (near Richmond)\Hatchling\519634	PXL_20230210_193354646.dng	511
FieldData\Smithsonian Pictures\Central VA (near Richmond)\Hatchling\519667	PXL_20230210_203557212.dng	512
FieldData\Smithsonian Pictures\Central VA (near Richmond)\Hatchling\519667	PXL_20230210_203600027.dng	513
FieldData\Smithsonian Pictures\Central VA (near Richmond)\Hatchling\519667	PXL_20230210_203602295.dng	514
FieldData\Smithsonian Pictures\Central VA (near Richmond)\Hatchling\519667	PXL_20230210_203618317.dng	515
FieldData\Smithsonian Pictures\Central VA (near Richmond)\Hatchling\519667	PXL_20230210_203619171.dng	516
FieldData\Smithsonian Pictures\Central VA (near Richmond)\Hatchling\519667	PXL_20230210_203626163.dng	517
FieldData\Smithsonian Pictures\Central VA (near Richmond)\Hatchling\519667	PXL_20230210_203626925.dng	518
FieldData\Smithsonian Pictures\Central VA (near Richmond)\Hatchling\519667	PXL_20230210_203638267.dng	519
FieldData\Smithsonian Pictures\Central VA (near Richmond)\Hatchling\519667	PXL_20230210_203638859.dng	520
FieldData\Smithsonian Pictures\Central VA (near Richmond)\Hatchling\519667	PXL_20230210_203650415.dng	521
FieldData\Smithsonian Pictures\Central VA (near Richmond)\Hatchling\519667	PXL_20230210_203656010.dng	522
FieldData\Smithsonian Pictures\Central VA (near Richmond)\Hatchling\519668	PXL_20230210_204000807.dng	523
FieldData\Smithsonian Pictures\Central VA (near Richmond)\Hatchling\519668	PXL_20230210_204003740.dng	524
FieldData\Smithsonian Pictures\Central VA (near Richmond)\Hatchling\519668	PXL_20230210_204005866.dng	525
FieldData\Smithsonian Pictures\Central VA (near Richmond)\Hatchling\519668	PXL_20230210_204033303.dng	526
FieldData\Smithsonian Pictures\Central VA (near Richmond)\Hatchling\519668	PXL_20230210_204036091.dng	527
FieldData\Smithsonian Pictures\Central VA (near Richmond)\Hatchling\519668	PXL_20230210_204046260.dng	528
FieldData\Smithsonian Pictures\Central VA (near Richmond)\Hatchling\519668	PXL_20230210_204047513.dng	529
FieldData\Smithsonian Pictures\Central VA (near Richmond)\Hatchling\519668	PXL_20230210_204102675.dng	530
FieldData\Smithsonian Pictures\Central VA (near Richmond)\Hatchling\519668	PXL_20230210_204103706.dng	531
FieldData\Smithsonian Pictures\Central VA (near Richmond)\Hatchling\519668	PXL_20230210_204119736.dng	532
FieldData\Smithsonian Pictures\Central VA (near Richmond)\Hatchling\519668	PXL_20230210_204120858.dng	533
FieldData\Smithsonian Pictures\Central VA (near Richmond)\Hatchling\519669	PXL_20230210_200701269.dng	534
FieldData\Smithsonian Pictures\Central VA (near Richmond)\Hatchling\519669	PXL_20230210_200703902.dng	535
FieldData\Smithsonian Pictures\Central VA (near Richmond)\Hatchling\519669	PXL_20230210_200706388.dng	536
FieldData\Smithsonian Pictures\Central VA (near Richmond)\Hatchling\519669	PXL_20230210_200724866.dng	537
FieldData\Smithsonian Pictures\Central VA (near Richmond)\Hatchling\519669	PXL_20230210_200726100.dng	538
FieldData\Smithsonian Pictures\Central VA (near Richmond)\Hatchling\519669	PXL_20230210_200738980.dng	539
FieldData\Smithsonian Pictures\Central VA (near Richmond)\Hatchling\519669	PXL_20230210_200739753.dng	540
FieldData\Smithsonian Pictures\Central VA (near Richmond)\Hatchling\519669	PXL_20230210_200752708.dng	541
FieldData\Smithsonian Pictures\Central VA (near Richmond)\Hatchling\519669	PXL_20230210_200753349.dng	542
FieldData\Smithsonian Pictures\Central VA (near Richmond)\Hatchling\519669	PXL_20230210_200806210.dng	543
FieldData\Smithsonian Pictures\Central VA (near Richmond)\Hatchling\519669	PXL_20230210_200806817.dng	544
FieldData\Smithsonian Pictures\Central VA (near Richmond)\Hatchling\519670	PXL_20230210_195935844.dng	545
FieldData\Smithsonian Pictures\Central VA (near Richmond)\Hatchling\519670	PXL_20230210_195938000.dng	546
FieldData\Smithsonian Pictures\Central VA (near Richmond)\Hatchling\519670	PXL_20230210_195939634.dng	547
FieldData\Smithsonian Pictures\Central VA (near Richmond)\Hatchling\519670	PXL_20230210_200000016.dng	548
FieldData\Smithsonian Pictures\Central VA (near Richmond)\Hatchling\519670	PXL_20230210_200000668.dng	549
FieldData\Smithsonian Pictures\Central VA (near Richmond)\Hatchling\519670	PXL_20230210_200012115.dng	550
FieldData\Smithsonian Pictures\Central VA (near Richmond)\Hatchling\519670	PXL_20230210_200013245.dng	551
FieldData\Smithsonian Pictures\Central VA (near Richmond)\Hatchling\519670	PXL_20230210_200029383.dng	552
FieldData\Smithsonian Pictures\Central VA (near Richmond)\Hatchling\519670	PXL_20230210_200030564.dng	553
FieldData\Smithsonian Pictures\Central VA (near Richmond)\Hatchling\519670	PXL_20230210_200038570.dng	554
FieldData\Smithsonian Pictures\Central VA (near Richmond)\Hatchling\519670	PXL_20230210_200039485.dng	555
FieldData\Smithsonian Pictures\Central VA (near Richmond)\Hatchling\519671	PXL_20230210_211022931.dng	556
FieldData\Smithsonian Pictures\Central VA (near Richmond)\Hatchling\519671	PXL_20230210_211025091.dng	557
FieldData\Smithsonian Pictures\Central VA (near Richmond)\Hatchling\519671	PXL_20230210_211028380.dng	558
FieldData\Smithsonian Pictures\Central VA (near Richmond)\Hatchling\519671	PXL_20230210_211047223.dng	559
FieldData\Smithsonian Pictures\Central VA (near Richmond)\Hatchling\519671	PXL_20230210_211047904.dng	560
FieldData\Smithsonian Pictures\Central VA (near Richmond)\Hatchling\519671	PXL_20230210_211056687.dng	561
FieldData\Smithsonian Pictures\Central VA (near Richmond)\Hatchling\519671	PXL_20230210_211057504.dng	562
FieldData\Smithsonian Pictures\Central VA (near Richmond)\Hatchling\519671	PXL_20230210_211111974.dng	563
FieldData\Smithsonian Pictures\Central VA (near Richmond)\Hatchling\519671	PXL_20230210_211112587.dng	564
FieldData\Smithsonian Pictures\Central VA (near Richmond)\Hatchling\519671	PXL_20230210_211126873.dng	565
FieldData\Smithsonian Pictures\Central VA (near Richmond)\Hatchling\519671	PXL_20230210_211128319.dng	566
FieldData\Smithsonian Pictures\Central VA (near Richmond)\Juvenile\519618	PXL_20230210_185653101.dng	567
FieldData\Smithsonian Pictures\Central VA (near Richmond)\Juvenile\519618	PXL_20230210_185657343.dng	568
FieldData\Smithsonian Pictures\Central VA (near Richmond)\Juvenile\519618	PXL_20230210_185659214.dng	569
FieldData\Smithsonian Pictures\Central VA (near Richmond)\Juvenile\519618	PXL_20230210_185714119.dng	570
FieldData\Smithsonian Pictures\Central VA (near Richmond)\Juvenile\519618	PXL_20230210_185714957.dng	571
FieldData\Smithsonian Pictures\Central VA (near Richmond)\Juvenile\519618	PXL_20230210_185722819.dng	572
FieldData\Smithsonian Pictures\Central VA (near Richmond)\Juvenile\519618	PXL_20230210_185723481.dng	573
FieldData\Smithsonian Pictures\Central VA (near Richmond)\Juvenile\519618	PXL_20230210_185731610.dng	574
FieldData\Smithsonian Pictures\Central VA (near Richmond)\Juvenile\519618	PXL_20230210_185732244.dng	575
FieldData\Smithsonian Pictures\Central VA (near Richmond)\Juvenile\519618	PXL_20230210_185743815.dng	576
FieldData\Smithsonian Pictures\Central VA (near Richmond)\Juvenile\519618	PXL_20230210_185747080.dng	577
FieldData\Smithsonian Pictures\Central VA (near Richmond)\Juvenile\519622	PXL_20230210_190414148.dng	578
FieldData\Smithsonian Pictures\Central VA (near Richmond)\Juvenile\519622	PXL_20230210_190417241.dng	579
FieldData\Smithsonian Pictures\Central VA (near Richmond)\Juvenile\519622	PXL_20230210_190419520.dng	580
FieldData\Smithsonian Pictures\Central VA (near Richmond)\Juvenile\519622	PXL_20230210_190430095.dng	581
FieldData\Smithsonian Pictures\Central VA (near Richmond)\Juvenile\519622	PXL_20230210_190430982.dng	582
FieldData\Smithsonian Pictures\Central VA (near Richmond)\Juvenile\519622	PXL_20230210_190436031.dng	583
FieldData\Smithsonian Pictures\Central VA (near Richmond)\Juvenile\519622	PXL_20230210_190436842.dng	584
FieldData\Smithsonian Pictures\Central VA (near Richmond)\Juvenile\519622	PXL_20230210_190442496.dng	585
FieldData\Smithsonian Pictures\Central VA (near Richmond)\Juvenile\519622	PXL_20230210_190444040.dng	586
FieldData\Smithsonian Pictures\Central VA (near Richmond)\Juvenile\519622	PXL_20230210_190455148.dng	587
FieldData\Smithsonian Pictures\Central VA (near Richmond)\Juvenile\519622	PXL_20230210_190457851.dng	588
FieldData\Smithsonian Pictures\NOVA-DC-MD\Adult\11600	PXL_20230125_145734169.dng	589
FieldData\Smithsonian Pictures\NOVA-DC-MD\Adult\11600	PXL_20230125_145748054.dng	590
FieldData\Smithsonian Pictures\NOVA-DC-MD\Adult\11600	PXL_20230125_145844768.dng	591
FieldData\Smithsonian Pictures\NOVA-DC-MD\Adult\11600	PXL_20230125_145903990.dng	592
FieldData\Smithsonian Pictures\NOVA-DC-MD\Adult\11600	PXL_20230125_145915828.dng	593
FieldData\Smithsonian Pictures\NOVA-DC-MD\Adult\11600	PXL_20230125_145918363.dng	594
FieldData\Smithsonian Pictures\NOVA-DC-MD\Adult\11600	PXL_20230125_145929335.dng	595
FieldData\Smithsonian Pictures\NOVA-DC-MD\Adult\11600	PXL_20230125_145932200.dng	596
FieldData\Smithsonian Pictures\NOVA-DC-MD\Adult\11600	PXL_20230125_145940313.dng	597
FieldData\Smithsonian Pictures\NOVA-DC-MD\Adult\11600	PXL_20230125_145941234.dng	598
FieldData\Smithsonian Pictures\NOVA-DC-MD\Adult\139661	PXL_20230131_194831549.dng	599
FieldData\Smithsonian Pictures\NOVA-DC-MD\Adult\139661	PXL_20230131_194836015.dng	600
FieldData\Smithsonian Pictures\NOVA-DC-MD\Adult\139661	PXL_20230131_194840433.dng	601
FieldData\Smithsonian Pictures\NOVA-DC-MD\Adult\139661	PXL_20230131_194852442.dng	602
FieldData\Smithsonian Pictures\NOVA-DC-MD\Adult\139661	PXL_20230131_194853632.dng	603
FieldData\Smithsonian Pictures\NOVA-DC-MD\Adult\139661	PXL_20230131_194901761.dng	604
FieldData\Smithsonian Pictures\NOVA-DC-MD\Adult\139661	PXL_20230131_194902520.dng	605
FieldData\Smithsonian Pictures\NOVA-DC-MD\Adult\139661	PXL_20230131_194909500.dng	606
FieldData\Smithsonian Pictures\NOVA-DC-MD\Adult\139661	PXL_20230131_194910235.dng	607
FieldData\Smithsonian Pictures\NOVA-DC-MD\Adult\139661	PXL_20230131_194917408.dng	608
FieldData\Smithsonian Pictures\NOVA-DC-MD\Adult\139661	PXL_20230131_194918018.dng	609
FieldData\Smithsonian Pictures\NOVA-DC-MD\Adult\141485	PXL_20230131_195525225.dng	610
FieldData\Smithsonian Pictures\NOVA-DC-MD\Adult\141485	PXL_20230131_195528402.dng	611
FieldData\Smithsonian Pictures\NOVA-DC-MD\Adult\141485	PXL_20230131_195545055.dng	612
FieldData\Smithsonian Pictures\NOVA-DC-MD\Adult\141485	PXL_20230131_195545938.dng	613
FieldData\Smithsonian Pictures\NOVA-DC-MD\Adult\141485	PXL_20230131_195555448.dng	614
FieldData\Smithsonian Pictures\NOVA-DC-MD\Adult\141485	PXL_20230131_195556107.dng	615
FieldData\Smithsonian Pictures\NOVA-DC-MD\Adult\141485	PXL_20230131_195603148.dng	616
FieldData\Smithsonian Pictures\NOVA-DC-MD\Adult\141485	PXL_20230131_195603832.dng	617
FieldData\Smithsonian Pictures\NOVA-DC-MD\Adult\141485	PXL_20230131_195615489.dng	618
FieldData\Smithsonian Pictures\NOVA-DC-MD\Adult\141485	PXL_20230131_195616142.dng	619
FieldData\Smithsonian Pictures\NOVA-DC-MD\Adult\17923	PXL_20230201_191633332.dng	620
FieldData\Smithsonian Pictures\NOVA-DC-MD\Adult\17923	PXL_20230201_191636394.dng	621
FieldData\Smithsonian Pictures\NOVA-DC-MD\Adult\17923	PXL_20230201_191648406.dng	622
FieldData\Smithsonian Pictures\NOVA-DC-MD\Adult\17923	PXL_20230201_191649069.dng	623
FieldData\Smithsonian Pictures\NOVA-DC-MD\Adult\17923	PXL_20230201_191657051.dng	624
FieldData\Smithsonian Pictures\NOVA-DC-MD\Adult\17923	PXL_20230201_191657679.dng	625
FieldData\Smithsonian Pictures\NOVA-DC-MD\Adult\17923	PXL_20230201_191705497.dng	626
FieldData\Smithsonian Pictures\NOVA-DC-MD\Adult\17923	PXL_20230201_191706662.dng	627
FieldData\Smithsonian Pictures\NOVA-DC-MD\Adult\17923	PXL_20230201_191712717.dng	628
FieldData\Smithsonian Pictures\NOVA-DC-MD\Adult\17923	PXL_20230201_191715412.dng	629
FieldData\Smithsonian Pictures\NOVA-DC-MD\Adult\203066	PXL_20230207_155958563.dng	630
FieldData\Smithsonian Pictures\NOVA-DC-MD\Adult\203066	PXL_20230207_160004674.dng	631
FieldData\Smithsonian Pictures\NOVA-DC-MD\Adult\203066	PXL_20230207_160008592.dng	632
FieldData\Smithsonian Pictures\NOVA-DC-MD\Adult\203066	PXL_20230207_160020191.dng	633
FieldData\Smithsonian Pictures\NOVA-DC-MD\Adult\203066	PXL_20230207_160020846.dng	634
FieldData\Smithsonian Pictures\NOVA-DC-MD\Adult\203066	PXL_20230207_160033061.dng	635
FieldData\Smithsonian Pictures\NOVA-DC-MD\Adult\203066	PXL_20230207_160034186.dng	636
FieldData\Smithsonian Pictures\NOVA-DC-MD\Adult\203066	PXL_20230207_160042283.dng	637
FieldData\Smithsonian Pictures\NOVA-DC-MD\Adult\203066	PXL_20230207_160043729.dng	638
FieldData\Smithsonian Pictures\NOVA-DC-MD\Adult\203066	PXL_20230207_160053365.dng	639
FieldData\Smithsonian Pictures\NOVA-DC-MD\Adult\203066	PXL_20230207_160055946.dng	640
FieldData\Smithsonian Pictures\NOVA-DC-MD\Adult\203309	PXL_20230207_155135889.dng	641
FieldData\Smithsonian Pictures\NOVA-DC-MD\Adult\203309	PXL_20230207_155139580.dng	642
FieldData\Smithsonian Pictures\NOVA-DC-MD\Adult\203309	PXL_20230207_155144415.dng	643
FieldData\Smithsonian Pictures\NOVA-DC-MD\Adult\203309	PXL_20230207_155155297.dng	644
FieldData\Smithsonian Pictures\NOVA-DC-MD\Adult\203309	PXL_20230207_155157412.dng	645
FieldData\Smithsonian Pictures\NOVA-DC-MD\Adult\203309	PXL_20230207_155204666.dng	646
FieldData\Smithsonian Pictures\NOVA-DC-MD\Adult\203309	PXL_20230207_155206327.dng	647
FieldData\Smithsonian Pictures\NOVA-DC-MD\Adult\203309	PXL_20230207_155215944.dng	648
FieldData\Smithsonian Pictures\NOVA-DC-MD\Adult\203309	PXL_20230207_155216627.dng	649
FieldData\Smithsonian Pictures\NOVA-DC-MD\Adult\203309	PXL_20230207_155225831.dng	650
FieldData\Smithsonian Pictures\NOVA-DC-MD\Adult\203309	PXL_20230207_155226499.dng	651
FieldData\Smithsonian Pictures\NOVA-DC-MD\Adult\20544	PXL_20230207_170646891.dng	652
FieldData\Smithsonian Pictures\NOVA-DC-MD\Adult\20544	PXL_20230207_170650069.dng	653
FieldData\Smithsonian Pictures\NOVA-DC-MD\Adult\20544	PXL_20230207_170652107.dng	654
FieldData\Smithsonian Pictures\NOVA-DC-MD\Adult\20544	PXL_20230207_170704971.dng	655
FieldData\Smithsonian Pictures\NOVA-DC-MD\Adult\20544	PXL_20230207_170706028.dng	656
FieldData\Smithsonian Pictures\NOVA-DC-MD\Adult\20544	PXL_20230207_170715066.dng	657
FieldData\Smithsonian Pictures\NOVA-DC-MD\Adult\20544	PXL_20230207_170715905.dng	658
FieldData\Smithsonian Pictures\NOVA-DC-MD\Adult\20544	PXL_20230207_170724858.dng	659
FieldData\Smithsonian Pictures\NOVA-DC-MD\Adult\20544	PXL_20230207_170728113.dng	660
FieldData\Smithsonian Pictures\NOVA-DC-MD\Adult\20544	PXL_20230207_170737424.dng	661
FieldData\Smithsonian Pictures\NOVA-DC-MD\Adult\20544	PXL_20230207_170739753.dng	662
FieldData\Smithsonian Pictures\NOVA-DC-MD\Adult\22468	PXL_20230201_200132761.dng	663
FieldData\Smithsonian Pictures\NOVA-DC-MD\Adult\22468	PXL_20230201_200134427.dng	664
FieldData\Smithsonian Pictures\NOVA-DC-MD\Adult\22468	PXL_20230201_200145538.dng	665
FieldData\Smithsonian Pictures\NOVA-DC-MD\Adult\22468	PXL_20230201_200146213.dng	666
FieldData\Smithsonian Pictures\NOVA-DC-MD\Adult\22468	PXL_20230201_200153144.dng	667
FieldData\Smithsonian Pictures\NOVA-DC-MD\Adult\22468	PXL_20230201_200153732.dng	668
FieldData\Smithsonian Pictures\NOVA-DC-MD\Adult\22468	PXL_20230201_200203265.dng	669
FieldData\Smithsonian Pictures\NOVA-DC-MD\Adult\22468	PXL_20230201_200203816.dng	670
FieldData\Smithsonian Pictures\NOVA-DC-MD\Adult\22468	PXL_20230201_200215613.dng	671
FieldData\Smithsonian Pictures\NOVA-DC-MD\Adult\22468	PXL_20230201_200216603.dng	672
FieldData\Smithsonian Pictures\NOVA-DC-MD\Adult\22608	PXL_20230125_162835581.dng	673
FieldData\Smithsonian Pictures\NOVA-DC-MD\Adult\22608	PXL_20230125_162838128.dng	674
FieldData\Smithsonian Pictures\NOVA-DC-MD\Adult\22608	PXL_20230125_162854703.dng	675
FieldData\Smithsonian Pictures\NOVA-DC-MD\Adult\22608	PXL_20230125_162855769.dng	676
FieldData\Smithsonian Pictures\NOVA-DC-MD\Adult\22608	PXL_20230125_162915541.dng	677
FieldData\Smithsonian Pictures\NOVA-DC-MD\Adult\22608	PXL_20230125_162916344.dng	678
FieldData\Smithsonian Pictures\NOVA-DC-MD\Adult\22608	PXL_20230125_162929914.dng	679
FieldData\Smithsonian Pictures\NOVA-DC-MD\Adult\22608	PXL_20230125_162930881.dng	680
FieldData\Smithsonian Pictures\NOVA-DC-MD\Adult\22608	aPXL_20230214_191709392.dng	681
FieldData\Smithsonian Pictures\NOVA-DC-MD\Adult\22608	aPXL_20230214_191711167.dng	682
FieldData\Smithsonian Pictures\NOVA-DC-MD\Adult\22608	aPXL_20230214_191712829.dng	683
FieldData\Smithsonian Pictures\NOVA-DC-MD\Adult\22609	PXL_20230125_163444490.dng	684
FieldData\Smithsonian Pictures\NOVA-DC-MD\Adult\22609	PXL_20230125_163446244.dng	685
FieldData\Smithsonian Pictures\NOVA-DC-MD\Adult\22609	PXL_20230125_163504615.dng	686
FieldData\Smithsonian Pictures\NOVA-DC-MD\Adult\22609	PXL_20230125_163505777.dng	687
FieldData\Smithsonian Pictures\NOVA-DC-MD\Adult\22609	PXL_20230125_163517457.dng	688
FieldData\Smithsonian Pictures\NOVA-DC-MD\Adult\22609	PXL_20230125_163518407.dng	689
FieldData\Smithsonian Pictures\NOVA-DC-MD\Adult\22609	PXL_20230125_163529458.dng	690
FieldData\Smithsonian Pictures\NOVA-DC-MD\Adult\22609	PXL_20230125_163530221.dng	691
FieldData\Smithsonian Pictures\NOVA-DC-MD\Adult\22609	PXL_20230125_163542841.dng	692
FieldData\Smithsonian Pictures\NOVA-DC-MD\Adult\22609	PXL_20230125_163543772.dng	693
FieldData\Smithsonian Pictures\NOVA-DC-MD\Adult\22610	PXL_20230125_162353337.dng	694
FieldData\Smithsonian Pictures\NOVA-DC-MD\Adult\22610	PXL_20230125_162354380.dng	695
FieldData\Smithsonian Pictures\NOVA-DC-MD\Adult\22610	PXL_20230125_162405824.dng	696
FieldData\Smithsonian Pictures\NOVA-DC-MD\Adult\22610	PXL_20230125_162406652.dng	697
FieldData\Smithsonian Pictures\NOVA-DC-MD\Adult\22610	PXL_20230125_162418393.dng	698
FieldData\Smithsonian Pictures\NOVA-DC-MD\Adult\22610	PXL_20230125_162419107.dng	699
FieldData\Smithsonian Pictures\NOVA-DC-MD\Adult\22610	PXL_20230125_162433969.dng	700
FieldData\Smithsonian Pictures\NOVA-DC-MD\Adult\22610	PXL_20230125_162435528.dng	701
FieldData\Smithsonian Pictures\NOVA-DC-MD\Adult\22610	aPXL_20230214_192649999.dng	702
FieldData\Smithsonian Pictures\NOVA-DC-MD\Adult\22610	aPXL_20230214_192651414.dng	703
FieldData\Smithsonian Pictures\NOVA-DC-MD\Adult\22610	aPXL_20230214_192652276.dng	704
FieldData\Smithsonian Pictures\NOVA-DC-MD\Adult\22611	PXL_20230125_164630374.dng	705
FieldData\Smithsonian Pictures\NOVA-DC-MD\Adult\22611	PXL_20230125_164632537.dng	706
FieldData\Smithsonian Pictures\NOVA-DC-MD\Adult\22611	PXL_20230125_164704346.dng	707
FieldData\Smithsonian Pictures\NOVA-DC-MD\Adult\22611	PXL_20230125_164705235.dng	708
FieldData\Smithsonian Pictures\NOVA-DC-MD\Adult\22611	PXL_20230125_164715577.dng	709
FieldData\Smithsonian Pictures\NOVA-DC-MD\Adult\22611	PXL_20230125_164716310.dng	710
FieldData\Smithsonian Pictures\NOVA-DC-MD\Adult\22611	PXL_20230125_164727927.dng	711
FieldData\Smithsonian Pictures\NOVA-DC-MD\Adult\22611	PXL_20230125_164732400.dng	712
FieldData\Smithsonian Pictures\NOVA-DC-MD\Adult\22611	PXL_20230125_164742071.dng	713
FieldData\Smithsonian Pictures\NOVA-DC-MD\Adult\22611	PXL_20230125_164742967.dng	714
FieldData\Smithsonian Pictures\NOVA-DC-MD\Adult\22612	PXL_20230125_165201336.dng	715
FieldData\Smithsonian Pictures\NOVA-DC-MD\Adult\22612	PXL_20230125_165202264.dng	716
FieldData\Smithsonian Pictures\NOVA-DC-MD\Adult\22612	PXL_20230125_165215038.dng	717
FieldData\Smithsonian Pictures\NOVA-DC-MD\Adult\22612	PXL_20230125_165215734.dng	718
FieldData\Smithsonian Pictures\NOVA-DC-MD\Adult\22612	PXL_20230125_165225652.dng	719
FieldData\Smithsonian Pictures\NOVA-DC-MD\Adult\22612	PXL_20230125_165226786.dng	720
FieldData\Smithsonian Pictures\NOVA-DC-MD\Adult\22612	PXL_20230125_165239682.dng	721
FieldData\Smithsonian Pictures\NOVA-DC-MD\Adult\22612	PXL_20230125_165240958.dng	722
FieldData\Smithsonian Pictures\NOVA-DC-MD\Adult\22612	aPXL_20230214_193140735.dng	723
FieldData\Smithsonian Pictures\NOVA-DC-MD\Adult\22612	aPXL_20230214_193144264.dng	724
FieldData\Smithsonian Pictures\NOVA-DC-MD\Adult\22612	aPXL_20230214_193145412.dng	725
FieldData\Smithsonian Pictures\NOVA-DC-MD\Adult\22613	PXL_20230125_164939067.dng	726
FieldData\Smithsonian Pictures\NOVA-DC-MD\Adult\22613	PXL_20230125_164940151.dng	727
FieldData\Smithsonian Pictures\NOVA-DC-MD\Adult\22613	PXL_20230125_164951451.dng	728
FieldData\Smithsonian Pictures\NOVA-DC-MD\Adult\22613	PXL_20230125_164952250.dng	729
FieldData\Smithsonian Pictures\NOVA-DC-MD\Adult\22613	PXL_20230125_165007700.dng	730
FieldData\Smithsonian Pictures\NOVA-DC-MD\Adult\22613	PXL_20230125_165009173.dng	731
FieldData\Smithsonian Pictures\NOVA-DC-MD\Adult\22613	PXL_20230125_165019653.dng	732
FieldData\Smithsonian Pictures\NOVA-DC-MD\Adult\22613	PXL_20230125_165020610.dng	733
FieldData\Smithsonian Pictures\NOVA-DC-MD\Adult\22613	aPXL_20230214_193621085.dng	734
FieldData\Smithsonian Pictures\NOVA-DC-MD\Adult\22613	aPXL_20230214_193623989.dng	735
FieldData\Smithsonian Pictures\NOVA-DC-MD\Adult\22613	aPXL_20230214_193626451.dng	736
FieldData\Smithsonian Pictures\NOVA-DC-MD\Adult\22614	PXL_20230125_164103073.dng	737
FieldData\Smithsonian Pictures\NOVA-DC-MD\Adult\22614	PXL_20230125_164104736.dng	738
FieldData\Smithsonian Pictures\NOVA-DC-MD\Adult\22614	PXL_20230125_164157631.dng	739
FieldData\Smithsonian Pictures\NOVA-DC-MD\Adult\22614	PXL_20230125_164159122.dng	740
FieldData\Smithsonian Pictures\NOVA-DC-MD\Adult\22614	PXL_20230125_164224346.dng	741
FieldData\Smithsonian Pictures\NOVA-DC-MD\Adult\22614	PXL_20230125_164225370.dng	742
FieldData\Smithsonian Pictures\NOVA-DC-MD\Adult\22614	PXL_20230125_164246637.dng	743
FieldData\Smithsonian Pictures\NOVA-DC-MD\Adult\22614	PXL_20230125_164251386.dng	744
FieldData\Smithsonian Pictures\NOVA-DC-MD\Adult\22614	PXL_20230125_164306352.dng	745
FieldData\Smithsonian Pictures\NOVA-DC-MD\Adult\22614	PXL_20230125_164307450.dng	746
FieldData\Smithsonian Pictures\NOVA-DC-MD\Adult\22616	PXL_20230201_203455695.dng	747
FieldData\Smithsonian Pictures\NOVA-DC-MD\Adult\22616	PXL_20230201_203458799.dng	748
FieldData\Smithsonian Pictures\NOVA-DC-MD\Adult\22616	PXL_20230201_203514532.dng	749
FieldData\Smithsonian Pictures\NOVA-DC-MD\Adult\22616	PXL_20230201_203515347.dng	750
FieldData\Smithsonian Pictures\NOVA-DC-MD\Adult\22616	PXL_20230201_203523371.dng	751
FieldData\Smithsonian Pictures\NOVA-DC-MD\Adult\22616	PXL_20230201_203523986.dng	752
FieldData\Smithsonian Pictures\NOVA-DC-MD\Adult\22616	PXL_20230201_203534234.dng	753
FieldData\Smithsonian Pictures\NOVA-DC-MD\Adult\22616	PXL_20230201_203534919.dng	754
FieldData\Smithsonian Pictures\NOVA-DC-MD\Adult\22616	PXL_20230201_203545069.dng	755
FieldData\Smithsonian Pictures\NOVA-DC-MD\Adult\22616	PXL_20230201_203545788.dng	756
FieldData\Smithsonian Pictures\NOVA-DC-MD\Adult\22618	PXL_20230201_201751630.dng	757
FieldData\Smithsonian Pictures\NOVA-DC-MD\Adult\22618	PXL_20230201_201753061.dng	758
FieldData\Smithsonian Pictures\NOVA-DC-MD\Adult\22618	PXL_20230201_201804618.dng	759
FieldData\Smithsonian Pictures\NOVA-DC-MD\Adult\22618	PXL_20230201_201805300.dng	760
FieldData\Smithsonian Pictures\NOVA-DC-MD\Adult\22618	PXL_20230201_201812560.dng	761
FieldData\Smithsonian Pictures\NOVA-DC-MD\Adult\22618	PXL_20230201_201813466.dng	762
FieldData\Smithsonian Pictures\NOVA-DC-MD\Adult\22618	PXL_20230201_201823624.dng	763
FieldData\Smithsonian Pictures\NOVA-DC-MD\Adult\22618	PXL_20230201_201824692.dng	764
FieldData\Smithsonian Pictures\NOVA-DC-MD\Adult\22618	PXL_20230201_201832739.dng	765
FieldData\Smithsonian Pictures\NOVA-DC-MD\Adult\22618	PXL_20230201_201833449.dng	766
FieldData\Smithsonian Pictures\NOVA-DC-MD\Adult\22619	PXL_20230201_201751630.dng	767
FieldData\Smithsonian Pictures\NOVA-DC-MD\Adult\22619	PXL_20230201_201753061.dng	768
FieldData\Smithsonian Pictures\NOVA-DC-MD\Adult\22619	PXL_20230201_201804618.dng	769
FieldData\Smithsonian Pictures\NOVA-DC-MD\Adult\22619	PXL_20230201_201805300.dng	770
FieldData\Smithsonian Pictures\NOVA-DC-MD\Adult\22619	PXL_20230201_201812560.dng	771
FieldData\Smithsonian Pictures\NOVA-DC-MD\Adult\22619	PXL_20230201_201813466.dng	772
FieldData\Smithsonian Pictures\NOVA-DC-MD\Adult\22619	PXL_20230201_201823624.dng	773
FieldData\Smithsonian Pictures\NOVA-DC-MD\Adult\22619	PXL_20230201_201824692.dng	774
FieldData\Smithsonian Pictures\NOVA-DC-MD\Adult\22619	PXL_20230201_201832739.dng	775
FieldData\Smithsonian Pictures\NOVA-DC-MD\Adult\22619	PXL_20230201_201833449.dng	776
FieldData\Smithsonian Pictures\NOVA-DC-MD\Adult\27761	PXL_20230125_174054627.dng	777
FieldData\Smithsonian Pictures\NOVA-DC-MD\Adult\27761	PXL_20230125_174055636.dng	778
FieldData\Smithsonian Pictures\NOVA-DC-MD\Adult\27761	PXL_20230125_174116124.dng	779
FieldData\Smithsonian Pictures\NOVA-DC-MD\Adult\27761	PXL_20230125_174116871.dng	780
FieldData\Smithsonian Pictures\NOVA-DC-MD\Adult\27761	PXL_20230125_174132554.dng	781
FieldData\Smithsonian Pictures\NOVA-DC-MD\Adult\27761	PXL_20230125_174133216.dng	782
FieldData\Smithsonian Pictures\NOVA-DC-MD\Adult\27761	PXL_20230125_174143388.dng	783
FieldData\Smithsonian Pictures\NOVA-DC-MD\Adult\27761	PXL_20230125_174144151.dng	784
FieldData\Smithsonian Pictures\NOVA-DC-MD\Adult\27761	aPXL_20230214_194151616.dng	785
FieldData\Smithsonian Pictures\NOVA-DC-MD\Adult\27761	aPXL_20230214_194154358.dng	786
FieldData\Smithsonian Pictures\NOVA-DC-MD\Adult\27761	aPXL_20230214_194156115.dng	787
FieldData\Smithsonian Pictures\NOVA-DC-MD\Adult\288179	PXL_20230207_154510724.dng	788
FieldData\Smithsonian Pictures\NOVA-DC-MD\Adult\288179	PXL_20230207_154514268.dng	789
FieldData\Smithsonian Pictures\NOVA-DC-MD\Adult\288179	PXL_20230207_154518690.dng	790
FieldData\Smithsonian Pictures\NOVA-DC-MD\Adult\288179	PXL_20230207_154531999.dng	791
FieldData\Smithsonian Pictures\NOVA-DC-MD\Adult\288179	PXL_20230207_154532910.dng	792
FieldData\Smithsonian Pictures\NOVA-DC-MD\Adult\288179	PXL_20230207_154544140.dng	793
FieldData\Smithsonian Pictures\NOVA-DC-MD\Adult\288179	PXL_20230207_154544797.dng	794
FieldData\Smithsonian Pictures\NOVA-DC-MD\Adult\288179	PXL_20230207_154553549.dng	795
FieldData\Smithsonian Pictures\NOVA-DC-MD\Adult\288179	PXL_20230207_154555363.dng	796
FieldData\Smithsonian Pictures\NOVA-DC-MD\Adult\288179	PXL_20230207_154605357.dng	797
FieldData\Smithsonian Pictures\NOVA-DC-MD\Adult\288179	PXL_20230207_154606611.dng	798
FieldData\Smithsonian Pictures\NOVA-DC-MD\Adult\288184	PXL_20230207_171109607.dng	799
FieldData\Smithsonian Pictures\NOVA-DC-MD\Adult\288184	PXL_20230207_171111356.dng	800
FieldData\Smithsonian Pictures\NOVA-DC-MD\Adult\288184	PXL_20230207_171113580.dng	801
FieldData\Smithsonian Pictures\NOVA-DC-MD\Adult\288184	PXL_20230207_171132844.dng	802
FieldData\Smithsonian Pictures\NOVA-DC-MD\Adult\288184	PXL_20230207_171134979.dng	803
FieldData\Smithsonian Pictures\NOVA-DC-MD\Adult\288184	PXL_20230207_171146902.dng	804
FieldData\Smithsonian Pictures\NOVA-DC-MD\Adult\288184	PXL_20230207_171147796.dng	805
FieldData\Smithsonian Pictures\NOVA-DC-MD\Adult\288184	PXL_20230207_171157155.dng	806
FieldData\Smithsonian Pictures\NOVA-DC-MD\Adult\288184	PXL_20230207_171157945.dng	807
FieldData\Smithsonian Pictures\NOVA-DC-MD\Adult\288184	PXL_20230207_171205378.dng	808
FieldData\Smithsonian Pictures\NOVA-DC-MD\Adult\288184	PXL_20230207_171206601.dng	809
FieldData\Smithsonian Pictures\NOVA-DC-MD\Adult\288185	PXL_20230207_172343181.dng	810
FieldData\Smithsonian Pictures\NOVA-DC-MD\Adult\288185	PXL_20230207_172346011.dng	811
FieldData\Smithsonian Pictures\NOVA-DC-MD\Adult\288185	PXL_20230207_172350383.dng	812
FieldData\Smithsonian Pictures\NOVA-DC-MD\Adult\288185	PXL_20230207_172416191.dng	813
FieldData\Smithsonian Pictures\NOVA-DC-MD\Adult\288185	PXL_20230207_172418585.dng	814
FieldData\Smithsonian Pictures\NOVA-DC-MD\Adult\288185	PXL_20230207_172429553.dng	815
FieldData\Smithsonian Pictures\NOVA-DC-MD\Adult\288185	PXL_20230207_172431934.dng	816
FieldData\Smithsonian Pictures\NOVA-DC-MD\Adult\288185	PXL_20230207_172442842.dng	817
FieldData\Smithsonian Pictures\NOVA-DC-MD\Adult\288185	PXL_20230207_172444044.dng	818
FieldData\Smithsonian Pictures\NOVA-DC-MD\Adult\288185	PXL_20230207_172454403.dng	819
FieldData\Smithsonian Pictures\NOVA-DC-MD\Adult\288185	PXL_20230207_172455379.dng	820
FieldData\Smithsonian Pictures\NOVA-DC-MD\Adult\288186	PXL_20230207_160752865.dng	821
FieldData\Smithsonian Pictures\NOVA-DC-MD\Adult\288186	PXL_20230207_160757466.dng	822
FieldData\Smithsonian Pictures\NOVA-DC-MD\Adult\288186	PXL_20230207_160759827.dng	823
FieldData\Smithsonian Pictures\NOVA-DC-MD\Adult\288186	PXL_20230207_160817318.dng	824
FieldData\Smithsonian Pictures\NOVA-DC-MD\Adult\288186	PXL_20230207_160818293.dng	825
FieldData\Smithsonian Pictures\NOVA-DC-MD\Adult\288186	PXL_20230207_160827020.dng	826
FieldData\Smithsonian Pictures\NOVA-DC-MD\Adult\288186	PXL_20230207_160827875.dng	827
FieldData\Smithsonian Pictures\NOVA-DC-MD\Adult\288186	PXL_20230207_160837363.dng	828
FieldData\Smithsonian Pictures\NOVA-DC-MD\Adult\288186	PXL_20230207_160838238.dng	829
FieldData\Smithsonian Pictures\NOVA-DC-MD\Adult\288186	PXL_20230207_160848550.dng	830
FieldData\Smithsonian Pictures\NOVA-DC-MD\Adult\288186	PXL_20230207_160851732.dng	831
FieldData\Smithsonian Pictures\NOVA-DC-MD\Adult\288187	PXL_20230207_174721759.dng	832
FieldData\Smithsonian Pictures\NOVA-DC-MD\Adult\288187	PXL_20230207_174724677.dng	833
FieldData\Smithsonian Pictures\NOVA-DC-MD\Adult\288187	PXL_20230207_174738295.dng	834
FieldData\Smithsonian Pictures\NOVA-DC-MD\Adult\288187	PXL_20230207_174739357.dng	835
FieldData\Smithsonian Pictures\NOVA-DC-MD\Adult\288187	PXL_20230207_174750981.dng	836
FieldData\Smithsonian Pictures\NOVA-DC-MD\Adult\288187	PXL_20230207_174752396.dng	837
FieldData\Smithsonian Pictures\NOVA-DC-MD\Adult\288187	PXL_20230207_174935935.dng	838
FieldData\Smithsonian Pictures\NOVA-DC-MD\Adult\288187	PXL_20230207_174937344.dng	839
FieldData\Smithsonian Pictures\NOVA-DC-MD\Adult\288187	PXL_20230207_174947513.dng	840
FieldData\Smithsonian Pictures\NOVA-DC-MD\Adult\288187	PXL_20230207_174949330.dng	841
FieldData\Smithsonian Pictures\NOVA-DC-MD\Adult\288188	PXL_20230207_161536433.dng	842
FieldData\Smithsonian Pictures\NOVA-DC-MD\Adult\288188	PXL_20230207_161538176.dng	843
FieldData\Smithsonian Pictures\NOVA-DC-MD\Adult\288188	PXL_20230207_161540532.dng	844
FieldData\Smithsonian Pictures\NOVA-DC-MD\Adult\288188	PXL_20230207_161615716.dng	845
FieldData\Smithsonian Pictures\NOVA-DC-MD\Adult\288188	PXL_20230207_161617564.dng	846
FieldData\Smithsonian Pictures\NOVA-DC-MD\Adult\288188	PXL_20230207_161634473.dng	847
FieldData\Smithsonian Pictures\NOVA-DC-MD\Adult\288188	PXL_20230207_161635224.dng	848
FieldData\Smithsonian Pictures\NOVA-DC-MD\Adult\288188	PXL_20230207_161648264.dng	849
FieldData\Smithsonian Pictures\NOVA-DC-MD\Adult\288188	PXL_20230207_161648976.dng	850
FieldData\Smithsonian Pictures\NOVA-DC-MD\Adult\288188	PXL_20230207_161659685.dng	851
FieldData\Smithsonian Pictures\NOVA-DC-MD\Adult\288188	PXL_20230207_161700973.dng	852
FieldData\Smithsonian Pictures\NOVA-DC-MD\Adult\288189	PXL_20230207_165914983.dng	853
FieldData\Smithsonian Pictures\NOVA-DC-MD\Adult\288189	PXL_20230207_165916294.dng	854
FieldData\Smithsonian Pictures\NOVA-DC-MD\Adult\288189	PXL_20230207_165917456.dng	855
FieldData\Smithsonian Pictures\NOVA-DC-MD\Adult\288189	PXL_20230207_165930693.dng	856
FieldData\Smithsonian Pictures\NOVA-DC-MD\Adult\288189	PXL_20230207_165931581.dng	857
FieldData\Smithsonian Pictures\NOVA-DC-MD\Adult\288189	PXL_20230207_165938557.dng	858
FieldData\Smithsonian Pictures\NOVA-DC-MD\Adult\288189	PXL_20230207_165940595.dng	859
FieldData\Smithsonian Pictures\NOVA-DC-MD\Adult\288189	PXL_20230207_165954037.dng	860
FieldData\Smithsonian Pictures\NOVA-DC-MD\Adult\288189	PXL_20230207_165954745.dng	861
FieldData\Smithsonian Pictures\NOVA-DC-MD\Adult\288189	PXL_20230207_170000424.dng	862
FieldData\Smithsonian Pictures\NOVA-DC-MD\Adult\288189	PXL_20230207_170001039.dng	863
FieldData\Smithsonian Pictures\NOVA-DC-MD\Adult\288190	PXL_20230207_162850368.dng	864
FieldData\Smithsonian Pictures\NOVA-DC-MD\Adult\288190	PXL_20230207_162852607.dng	865
FieldData\Smithsonian Pictures\NOVA-DC-MD\Adult\288190	PXL_20230207_162855884.dng	866
FieldData\Smithsonian Pictures\NOVA-DC-MD\Adult\288190	PXL_20230207_162910633.dng	867
FieldData\Smithsonian Pictures\NOVA-DC-MD\Adult\288190	PXL_20230207_162911537.dng	868
FieldData\Smithsonian Pictures\NOVA-DC-MD\Adult\288190	PXL_20230207_162923753.dng	869
FieldData\Smithsonian Pictures\NOVA-DC-MD\Adult\288190	PXL_20230207_162925268.dng	870
FieldData\Smithsonian Pictures\NOVA-DC-MD\Adult\288190	PXL_20230207_162936291.dng	871
FieldData\Smithsonian Pictures\NOVA-DC-MD\Adult\288190	PXL_20230207_162936820.dng	872
FieldData\Smithsonian Pictures\NOVA-DC-MD\Adult\288190	PXL_20230207_162945266.dng	873
FieldData\Smithsonian Pictures\NOVA-DC-MD\Adult\288190	PXL_20230207_162946134.dng	874
FieldData\Smithsonian Pictures\NOVA-DC-MD\Adult\288199	PXL_20230207_190327245.dng	875
FieldData\Smithsonian Pictures\NOVA-DC-MD\Adult\288199	PXL_20230207_190330038.dng	876
FieldData\Smithsonian Pictures\NOVA-DC-MD\Adult\288199	PXL_20230207_190332130.dng	877
FieldData\Smithsonian Pictures\NOVA-DC-MD\Adult\288199	PXL_20230207_190343535.dng	878
FieldData\Smithsonian Pictures\NOVA-DC-MD\Adult\288199	PXL_20230207_190344835.dng	879
FieldData\Smithsonian Pictures\NOVA-DC-MD\Adult\288199	PXL_20230207_190353947.dng	880
FieldData\Smithsonian Pictures\NOVA-DC-MD\Adult\288199	PXL_20230207_190355022.dng	881
FieldData\Smithsonian Pictures\NOVA-DC-MD\Adult\288199	PXL_20230207_190403630.dng	882
FieldData\Smithsonian Pictures\NOVA-DC-MD\Adult\288199	PXL_20230207_190404380.dng	883
FieldData\Smithsonian Pictures\NOVA-DC-MD\Adult\288199	PXL_20230207_190411718.dng	884
FieldData\Smithsonian Pictures\NOVA-DC-MD\Adult\288199	PXL_20230207_190415768.dng	885
FieldData\Smithsonian Pictures\NOVA-DC-MD\Adult\288209	PXL_20230207_172934972.dng	886
FieldData\Smithsonian Pictures\NOVA-DC-MD\Adult\288209	PXL_20230207_172937467.dng	887
FieldData\Smithsonian Pictures\NOVA-DC-MD\Adult\288209	PXL_20230207_172939734.dng	888
FieldData\Smithsonian Pictures\NOVA-DC-MD\Adult\288209	PXL_20230207_172951845.dng	889
FieldData\Smithsonian Pictures\NOVA-DC-MD\Adult\288209	PXL_20230207_172953168.dng	890
FieldData\Smithsonian Pictures\NOVA-DC-MD\Adult\288209	PXL_20230207_173002552.dng	891
FieldData\Smithsonian Pictures\NOVA-DC-MD\Adult\288209	PXL_20230207_173003585.dng	892
FieldData\Smithsonian Pictures\NOVA-DC-MD\Adult\288209	PXL_20230207_173011823.dng	893
FieldData\Smithsonian Pictures\NOVA-DC-MD\Adult\288209	PXL_20230207_173012442.dng	894
FieldData\Smithsonian Pictures\NOVA-DC-MD\Adult\288209	PXL_20230207_173024040.dng	895
FieldData\Smithsonian Pictures\NOVA-DC-MD\Adult\288209	PXL_20230207_173027299.dng	896
FieldData\Smithsonian Pictures\NOVA-DC-MD\Adult\288210	PXL_20230207_170352484.dng	897
FieldData\Smithsonian Pictures\NOVA-DC-MD\Adult\288210	PXL_20230207_170354580.dng	898
FieldData\Smithsonian Pictures\NOVA-DC-MD\Adult\288210	PXL_20230207_170359558.dng	899
FieldData\Smithsonian Pictures\NOVA-DC-MD\Adult\288210	PXL_20230207_170411943.dng	900
FieldData\Smithsonian Pictures\NOVA-DC-MD\Adult\288210	PXL_20230207_170412817.dng	901
FieldData\Smithsonian Pictures\NOVA-DC-MD\Adult\288210	PXL_20230207_170425214.dng	902
FieldData\Smithsonian Pictures\NOVA-DC-MD\Adult\288210	PXL_20230207_170425912.dng	903
FieldData\Smithsonian Pictures\NOVA-DC-MD\Adult\288210	PXL_20230207_170440171.dng	904
FieldData\Smithsonian Pictures\NOVA-DC-MD\Adult\288210	PXL_20230207_170440851.dng	905
FieldData\Smithsonian Pictures\NOVA-DC-MD\Adult\288210	PXL_20230207_170456504.dng	906
FieldData\Smithsonian Pictures\NOVA-DC-MD\Adult\288210	PXL_20230207_170458259.dng	907
FieldData\Smithsonian Pictures\NOVA-DC-MD\Adult\29774	PXL_20230125_174733549.dng	908
FieldData\Smithsonian Pictures\NOVA-DC-MD\Adult\29774	PXL_20230125_174735826.dng	909
FieldData\Smithsonian Pictures\NOVA-DC-MD\Adult\29774	PXL_20230125_174757068.dng	910
FieldData\Smithsonian Pictures\NOVA-DC-MD\Adult\29774	PXL_20230125_174757929.dng	911
FieldData\Smithsonian Pictures\NOVA-DC-MD\Adult\29774	PXL_20230125_174819418.dng	912
FieldData\Smithsonian Pictures\NOVA-DC-MD\Adult\29774	PXL_20230125_174820325.dng	913
FieldData\Smithsonian Pictures\NOVA-DC-MD\Adult\29774	PXL_20230125_174832440.dng	914
FieldData\Smithsonian Pictures\NOVA-DC-MD\Adult\29774	PXL_20230125_174833259.dng	915
FieldData\Smithsonian Pictures\NOVA-DC-MD\Adult\29774	PXL_20230125_174843634.dng	916
FieldData\Smithsonian Pictures\NOVA-DC-MD\Adult\29774	PXL_20230125_174844616.dng	917
FieldData\Smithsonian Pictures\NOVA-DC-MD\Adult\326308	PXL_20230208_194806355.dng	918
FieldData\Smithsonian Pictures\NOVA-DC-MD\Adult\326308	PXL_20230208_194811373.dng	919
FieldData\Smithsonian Pictures\NOVA-DC-MD\Adult\326308	PXL_20230208_194813201.dng	920
FieldData\Smithsonian Pictures\NOVA-DC-MD\Adult\326308	PXL_20230208_194829479.dng	921
FieldData\Smithsonian Pictures\NOVA-DC-MD\Adult\326308	PXL_20230208_194830414.dng	922
FieldData\Smithsonian Pictures\NOVA-DC-MD\Adult\326308	PXL_20230208_194844108.dng	923
FieldData\Smithsonian Pictures\NOVA-DC-MD\Adult\326308	PXL_20230208_194849553.dng	924
FieldData\Smithsonian Pictures\NOVA-DC-MD\Adult\326308	PXL_20230208_194856229.dng	925
FieldData\Smithsonian Pictures\NOVA-DC-MD\Adult\326308	PXL_20230208_194858400.dng	926
FieldData\Smithsonian Pictures\NOVA-DC-MD\Adult\326308	PXL_20230208_194907635.dng	927
FieldData\Smithsonian Pictures\NOVA-DC-MD\Adult\326308	PXL_20230208_194909261.dng	928
FieldData\Smithsonian Pictures\NOVA-DC-MD\Adult\36684	PXL_20230125_180023066.dng	929
FieldData\Smithsonian Pictures\NOVA-DC-MD\Adult\36684	PXL_20230125_180024509.dng	930
FieldData\Smithsonian Pictures\NOVA-DC-MD\Adult\36684	PXL_20230125_180037271.dng	931
FieldData\Smithsonian Pictures\NOVA-DC-MD\Adult\36684	PXL_20230125_180038103.dng	932
FieldData\Smithsonian Pictures\NOVA-DC-MD\Adult\36684	PXL_20230125_180052248.dng	933
FieldData\Smithsonian Pictures\NOVA-DC-MD\Adult\36684	PXL_20230125_180052997.dng	934
FieldData\Smithsonian Pictures\NOVA-DC-MD\Adult\36684	PXL_20230125_180107292.dng	935
FieldData\Smithsonian Pictures\NOVA-DC-MD\Adult\36684	PXL_20230125_180108506.dng	936
FieldData\Smithsonian Pictures\NOVA-DC-MD\Adult\36684	aPXL_20230214_194810132.dng	937
FieldData\Smithsonian Pictures\NOVA-DC-MD\Adult\36684	aPXL_20230214_194811408.dng	938
FieldData\Smithsonian Pictures\NOVA-DC-MD\Adult\36684	aPXL_20230214_194812591.dng	939
FieldData\Smithsonian Pictures\NOVA-DC-MD\Adult\42824	PXL_20230207_190759806.dng	940
FieldData\Smithsonian Pictures\NOVA-DC-MD\Adult\42824	PXL_20230207_190802592.dng	941
FieldData\Smithsonian Pictures\NOVA-DC-MD\Adult\42824	PXL_20230207_190808301.dng	942
FieldData\Smithsonian Pictures\NOVA-DC-MD\Adult\42824	PXL_20230207_190819511.dng	943
FieldData\Smithsonian Pictures\NOVA-DC-MD\Adult\42824	PXL_20230207_190820318.dng	944
FieldData\Smithsonian Pictures\NOVA-DC-MD\Adult\42824	PXL_20230207_190830348.dng	945
FieldData\Smithsonian Pictures\NOVA-DC-MD\Adult\42824	PXL_20230207_190830942.dng	946
FieldData\Smithsonian Pictures\NOVA-DC-MD\Adult\42824	PXL_20230207_190842462.dng	947
FieldData\Smithsonian Pictures\NOVA-DC-MD\Adult\42824	PXL_20230207_190843170.dng	948
FieldData\Smithsonian Pictures\NOVA-DC-MD\Adult\42824	PXL_20230207_190854478.dng	949
FieldData\Smithsonian Pictures\NOVA-DC-MD\Adult\42824	PXL_20230207_190855237.dng	950
FieldData\Smithsonian Pictures\NOVA-DC-MD\Adult\42825	PXL_20230125_185501109.dng	951
FieldData\Smithsonian Pictures\NOVA-DC-MD\Adult\42825	PXL_20230125_185502038.dng	952
FieldData\Smithsonian Pictures\NOVA-DC-MD\Adult\42825	PXL_20230125_185529341.dng	953
FieldData\Smithsonian Pictures\NOVA-DC-MD\Adult\42825	PXL_20230125_185530118.dng	954
FieldData\Smithsonian Pictures\NOVA-DC-MD\Adult\42825	PXL_20230125_185538591.dng	955
FieldData\Smithsonian Pictures\NOVA-DC-MD\Adult\42825	PXL_20230125_185539374.dng	956
FieldData\Smithsonian Pictures\NOVA-DC-MD\Adult\42825	PXL_20230125_185547778.dng	957
FieldData\Smithsonian Pictures\NOVA-DC-MD\Adult\42825	PXL_20230125_185548497.dng	958
FieldData\Smithsonian Pictures\NOVA-DC-MD\Adult\42825	PXL_20230125_185603518.dng	959
FieldData\Smithsonian Pictures\NOVA-DC-MD\Adult\42825	PXL_20230125_185604343.dng	960
FieldData\Smithsonian Pictures\NOVA-DC-MD\Adult\45346	PXL_20230125_190526020.dng	961
FieldData\Smithsonian Pictures\NOVA-DC-MD\Adult\45346	PXL_20230125_190526877.dng	962
FieldData\Smithsonian Pictures\NOVA-DC-MD\Adult\45346	PXL_20230125_190540166.dng	963
FieldData\Smithsonian Pictures\NOVA-DC-MD\Adult\45346	PXL_20230125_190552064.dng	964
FieldData\Smithsonian Pictures\NOVA-DC-MD\Adult\45346	PXL_20230125_190552862.dng	965
FieldData\Smithsonian Pictures\NOVA-DC-MD\Adult\45346	PXL_20230125_190608100.dng	966
FieldData\Smithsonian Pictures\NOVA-DC-MD\Adult\45346	PXL_20230125_190608950.dng	967
FieldData\Smithsonian Pictures\NOVA-DC-MD\Adult\45346	aPXL_20230214_195338877.dng	968
FieldData\Smithsonian Pictures\NOVA-DC-MD\Adult\45346	aPXL_20230214_195341403.dng	969
FieldData\Smithsonian Pictures\NOVA-DC-MD\Adult\45346	aPXL_20230214_195343527.dng	970
FieldData\Smithsonian Pictures\NOVA-DC-MD\Adult\45769	PXL_20230125_191244184.dng	971
FieldData\Smithsonian Pictures\NOVA-DC-MD\Adult\45769	PXL_20230125_191245573.dng	972
FieldData\Smithsonian Pictures\NOVA-DC-MD\Adult\45769	PXL_20230125_191316337.dng	973
FieldData\Smithsonian Pictures\NOVA-DC-MD\Adult\45769	PXL_20230125_191316983.dng	974
FieldData\Smithsonian Pictures\NOVA-DC-MD\Adult\45769	PXL_20230125_191332000.dng	975
FieldData\Smithsonian Pictures\NOVA-DC-MD\Adult\45769	PXL_20230125_191332643.dng	976
FieldData\Smithsonian Pictures\NOVA-DC-MD\Adult\45769	PXL_20230125_191342631.dng	977
FieldData\Smithsonian Pictures\NOVA-DC-MD\Adult\45769	PXL_20230125_191343442.dng	978
FieldData\Smithsonian Pictures\NOVA-DC-MD\Adult\45769	PXL_20230125_191353803.dng	979
FieldData\Smithsonian Pictures\NOVA-DC-MD\Adult\45769	PXL_20230125_191354763.dng	980
FieldData\Smithsonian Pictures\NOVA-DC-MD\Adult\45779	PXL_20230214_183639129.dng	981
FieldData\Smithsonian Pictures\NOVA-DC-MD\Adult\45779	PXL_20230214_183641475.dng	982
FieldData\Smithsonian Pictures\NOVA-DC-MD\Adult\45779	PXL_20230214_183643951.dng	983
FieldData\Smithsonian Pictures\NOVA-DC-MD\Adult\45779	PXL_20230214_183701099.dng	984
FieldData\Smithsonian Pictures\NOVA-DC-MD\Adult\45779	PXL_20230214_183702491.dng	985
FieldData\Smithsonian Pictures\NOVA-DC-MD\Adult\45779	PXL_20230214_183713192.dng	986
FieldData\Smithsonian Pictures\NOVA-DC-MD\Adult\45779	PXL_20230214_183715277.dng	987
FieldData\Smithsonian Pictures\NOVA-DC-MD\Adult\45779	PXL_20230214_183730226.dng	988
FieldData\Smithsonian Pictures\NOVA-DC-MD\Adult\45779	PXL_20230214_183731290.dng	989
FieldData\Smithsonian Pictures\NOVA-DC-MD\Adult\45779	PXL_20230214_183748244.dng	990
FieldData\Smithsonian Pictures\NOVA-DC-MD\Adult\45779	PXL_20230214_183749129.dng	991
FieldData\Smithsonian Pictures\NOVA-DC-MD\Adult\49607	PXL_20230125_194028906.dng	992
FieldData\Smithsonian Pictures\NOVA-DC-MD\Adult\49607	PXL_20230125_194029704.dng	993
FieldData\Smithsonian Pictures\NOVA-DC-MD\Adult\49607	PXL_20230125_194048470.dng	994
FieldData\Smithsonian Pictures\NOVA-DC-MD\Adult\49607	PXL_20230125_194049360.dng	995
FieldData\Smithsonian Pictures\NOVA-DC-MD\Adult\49607	PXL_20230125_194100165.dng	996
FieldData\Smithsonian Pictures\NOVA-DC-MD\Adult\49607	PXL_20230125_194100869.dng	997
FieldData\Smithsonian Pictures\NOVA-DC-MD\Adult\49607	PXL_20230125_194117035.dng	998
FieldData\Smithsonian Pictures\NOVA-DC-MD\Adult\49607	PXL_20230125_194118020.dng	999
FieldData\Smithsonian Pictures\NOVA-DC-MD\Adult\49607	PXL_20230125_194127596.dng	1000
FieldData\Smithsonian Pictures\NOVA-DC-MD\Adult\49607	PXL_20230125_194128341.dng	1001
FieldData\Smithsonian Pictures\NOVA-DC-MD\Adult\49607	PXL_20230125_194825592.dng	1002
FieldData\Smithsonian Pictures\NOVA-DC-MD\Adult\52615	PXL_20230125_195350611.dng	1003
FieldData\Smithsonian Pictures\NOVA-DC-MD\Adult\52615	PXL_20230125_195351621.dng	1004
FieldData\Smithsonian Pictures\NOVA-DC-MD\Adult\52615	PXL_20230125_195414556.dng	1005
FieldData\Smithsonian Pictures\NOVA-DC-MD\Adult\52615	PXL_20230125_195415455.dng	1006
FieldData\Smithsonian Pictures\NOVA-DC-MD\Adult\52615	PXL_20230125_195424935.dng	1007
FieldData\Smithsonian Pictures\NOVA-DC-MD\Adult\52615	PXL_20230125_195425643.dng	1008
FieldData\Smithsonian Pictures\NOVA-DC-MD\Adult\52615	PXL_20230125_195436823.dng	1009
FieldData\Smithsonian Pictures\NOVA-DC-MD\Adult\52615	PXL_20230125_195437417.dng	1010
FieldData\Smithsonian Pictures\NOVA-DC-MD\Adult\52615	PXL_20230125_195445713.dng	1011
FieldData\Smithsonian Pictures\NOVA-DC-MD\Adult\52615	PXL_20230125_195446420.dng	1012
FieldData\Smithsonian Pictures\NOVA-DC-MD\Adult\575054	PXL_20230210_184848930.dng	1013
FieldData\Smithsonian Pictures\NOVA-DC-MD\Adult\575054	PXL_20230210_184852437.dng	1014
FieldData\Smithsonian Pictures\NOVA-DC-MD\Adult\575054	PXL_20230210_184854405.dng	1015
FieldData\Smithsonian Pictures\NOVA-DC-MD\Adult\575054	PXL_20230210_184912358.dng	1016
FieldData\Smithsonian Pictures\NOVA-DC-MD\Adult\575054	PXL_20230210_184913153.dng	1017
FieldData\Smithsonian Pictures\NOVA-DC-MD\Adult\575054	PXL_20230210_184924144.dng	1018
FieldData\Smithsonian Pictures\NOVA-DC-MD\Adult\575054	PXL_20230210_184926495.dng	1019
FieldData\Smithsonian Pictures\NOVA-DC-MD\Adult\575054	PXL_20230210_184936372.dng	1020
FieldData\Smithsonian Pictures\NOVA-DC-MD\Adult\575054	PXL_20230210_184937253.dng	1021
FieldData\Smithsonian Pictures\NOVA-DC-MD\Adult\575054	PXL_20230210_184955141.dng	1022
FieldData\Smithsonian Pictures\NOVA-DC-MD\Adult\575054	PXL_20230210_184955797.dng	1023
FieldData\Smithsonian Pictures\NOVA-DC-MD\Adult\65908	PXL_20230131_153433134.dng	1024
FieldData\Smithsonian Pictures\NOVA-DC-MD\Adult\65908	PXL_20230131_153435839.dng	1025
FieldData\Smithsonian Pictures\NOVA-DC-MD\Adult\65908	PXL_20230131_153456788.dng	1026
FieldData\Smithsonian Pictures\NOVA-DC-MD\Adult\65908	PXL_20230131_153457786.dng	1027
FieldData\Smithsonian Pictures\NOVA-DC-MD\Adult\65908	PXL_20230131_153508359.dng	1028
FieldData\Smithsonian Pictures\NOVA-DC-MD\Adult\65908	PXL_20230131_153510831.dng	1029
FieldData\Smithsonian Pictures\NOVA-DC-MD\Adult\65908	PXL_20230131_153521590.dng	1030
FieldData\Smithsonian Pictures\NOVA-DC-MD\Adult\65908	PXL_20230131_153522705.dng	1031
FieldData\Smithsonian Pictures\NOVA-DC-MD\Adult\65908	PXL_20230131_153532204.dng	1032
FieldData\Smithsonian Pictures\NOVA-DC-MD\Adult\65908	PXL_20230131_153532968.dng	1033
FieldData\Smithsonian Pictures\NOVA-DC-MD\Juvenile\103824	PXL_20230131_193126211.dng	1034
FieldData\Smithsonian Pictures\NOVA-DC-MD\Juvenile\103824	PXL_20230131_193129841.dng	1035
FieldData\Smithsonian Pictures\NOVA-DC-MD\Juvenile\103824	PXL_20230131_193131310.dng	1036
FieldData\Smithsonian Pictures\NOVA-DC-MD\Juvenile\103824	PXL_20230131_193145576.dng	1037
FieldData\Smithsonian Pictures\NOVA-DC-MD\Juvenile\103824	PXL_20230131_193147025.dng	1038
FieldData\Smithsonian Pictures\NOVA-DC-MD\Juvenile\103824	PXL_20230131_193154924.dng	1039
FieldData\Smithsonian Pictures\NOVA-DC-MD\Juvenile\103824	PXL_20230131_193155964.dng	1040
FieldData\Smithsonian Pictures\NOVA-DC-MD\Juvenile\103824	PXL_20230131_193202835.dng	1041
FieldData\Smithsonian Pictures\NOVA-DC-MD\Juvenile\103824	PXL_20230131_193203569.dng	1042
FieldData\Smithsonian Pictures\NOVA-DC-MD\Juvenile\103824	PXL_20230131_193211144.dng	1043
FieldData\Smithsonian Pictures\NOVA-DC-MD\Juvenile\103824	PXL_20230131_193211940.dng	1044
FieldData\Smithsonian Pictures\NOVA-DC-MD\Juvenile\139660	PXL_20230131_194226549.dng	1045
FieldData\Smithsonian Pictures\NOVA-DC-MD\Juvenile\139660	PXL_20230131_194227878.dng	1046
FieldData\Smithsonian Pictures\NOVA-DC-MD\Juvenile\139660	PXL_20230131_194243418.dng	1047
FieldData\Smithsonian Pictures\NOVA-DC-MD\Juvenile\139660	PXL_20230131_194244550.dng	1048
FieldData\Smithsonian Pictures\NOVA-DC-MD\Juvenile\139660	PXL_20230131_194255912.dng	1049
FieldData\Smithsonian Pictures\NOVA-DC-MD\Juvenile\139660	PXL_20230131_194256540.dng	1050
FieldData\Smithsonian Pictures\NOVA-DC-MD\Juvenile\139660	PXL_20230131_194304949.dng	1051
FieldData\Smithsonian Pictures\NOVA-DC-MD\Juvenile\139660	PXL_20230131_194305915.dng	1052
FieldData\Smithsonian Pictures\NOVA-DC-MD\Juvenile\139660	PXL_20230131_194319926.dng	1053
FieldData\Smithsonian Pictures\NOVA-DC-MD\Juvenile\139660	PXL_20230131_194321428.dng	1054
FieldData\Smithsonian Pictures\NOVA-DC-MD\Juvenile\141486	PXL_20230131_200700233.dng	1055
FieldData\Smithsonian Pictures\NOVA-DC-MD\Juvenile\141486	PXL_20230131_200702920.dng	1056
FieldData\Smithsonian Pictures\NOVA-DC-MD\Juvenile\141486	PXL_20230131_200716750.dng	1057
FieldData\Smithsonian Pictures\NOVA-DC-MD\Juvenile\141486	PXL_20230131_200717655.dng	1058
FieldData\Smithsonian Pictures\NOVA-DC-MD\Juvenile\141486	PXL_20230131_200727038.dng	1059
FieldData\Smithsonian Pictures\NOVA-DC-MD\Juvenile\141486	PXL_20230131_200727831.dng	1060
FieldData\Smithsonian Pictures\NOVA-DC-MD\Juvenile\141486	PXL_20230131_200739399.dng	1061
FieldData\Smithsonian Pictures\NOVA-DC-MD\Juvenile\141486	PXL_20230131_200740001.dng	1062
FieldData\Smithsonian Pictures\NOVA-DC-MD\Juvenile\141486	PXL_20230131_200749244.dng	1063
FieldData\Smithsonian Pictures\NOVA-DC-MD\Juvenile\141486	PXL_20230131_200750673.dng	1064
FieldData\Smithsonian Pictures\NOVA-DC-MD\Juvenile\141937	PXL_20230131_201424046.dng	1065
FieldData\Smithsonian Pictures\NOVA-DC-MD\Juvenile\141937	PXL_20230131_201429690.dng	1066
FieldData\Smithsonian Pictures\NOVA-DC-MD\Juvenile\141937	PXL_20230131_201442790.dng	1067
FieldData\Smithsonian Pictures\NOVA-DC-MD\Juvenile\141937	PXL_20230131_201443689.dng	1068
FieldData\Smithsonian Pictures\NOVA-DC-MD\Juvenile\141937	PXL_20230131_201451242.dng	1069
FieldData\Smithsonian Pictures\NOVA-DC-MD\Juvenile\141937	PXL_20230131_201452017.dng	1070
FieldData\Smithsonian Pictures\NOVA-DC-MD\Juvenile\141937	PXL_20230131_201459617.dng	1071
FieldData\Smithsonian Pictures\NOVA-DC-MD\Juvenile\141937	PXL_20230131_201500353.dng	1072
FieldData\Smithsonian Pictures\NOVA-DC-MD\Juvenile\141937	PXL_20230131_201514045.dng	1073
FieldData\Smithsonian Pictures\NOVA-DC-MD\Juvenile\141937	PXL_20230131_201519522.dng	1074
FieldData\Smithsonian Pictures\NOVA-DC-MD\Juvenile\16229	PXL_20230201_185458738.dng	1075
FieldData\Smithsonian Pictures\NOVA-DC-MD\Juvenile\16229	PXL_20230201_185501686.dng	1076
FieldData\Smithsonian Pictures\NOVA-DC-MD\Juvenile\16229	PXL_20230201_185514968.dng	1077
FieldData\Smithsonian Pictures\NOVA-DC-MD\Juvenile\16229	PXL_20230201_185516089.dng	1078
FieldData\Smithsonian Pictures\NOVA-DC-MD\Juvenile\16229	PXL_20230201_185525360.dng	1079
FieldData\Smithsonian Pictures\NOVA-DC-MD\Juvenile\16229	PXL_20230201_185526644.dng	1080
FieldData\Smithsonian Pictures\NOVA-DC-MD\Juvenile\16229	PXL_20230201_185536228.dng	1081
FieldData\Smithsonian Pictures\NOVA-DC-MD\Juvenile\16229	PXL_20230201_185536823.dng	1082
FieldData\Smithsonian Pictures\NOVA-DC-MD\Juvenile\16229	PXL_20230201_185544236.dng	1083
FieldData\Smithsonian Pictures\NOVA-DC-MD\Juvenile\16229	PXL_20230201_185545256.dng	1084
FieldData\Smithsonian Pictures\NOVA-DC-MD\Juvenile\17014	PXL_20230201_184948167.dng	1085
FieldData\Smithsonian Pictures\NOVA-DC-MD\Juvenile\17014	PXL_20230201_184951256.dng	1086
FieldData\Smithsonian Pictures\NOVA-DC-MD\Juvenile\17014	PXL_20230201_185008006.dng	1087
FieldData\Smithsonian Pictures\NOVA-DC-MD\Juvenile\17014	PXL_20230201_185008897.dng	1088
FieldData\Smithsonian Pictures\NOVA-DC-MD\Juvenile\17014	PXL_20230201_185017411.dng	1089
FieldData\Smithsonian Pictures\NOVA-DC-MD\Juvenile\17014	PXL_20230201_185018143.dng	1090
FieldData\Smithsonian Pictures\NOVA-DC-MD\Juvenile\17014	PXL_20230201_185024938.dng	1091
FieldData\Smithsonian Pictures\NOVA-DC-MD\Juvenile\17014	PXL_20230201_185025549.dng	1092
FieldData\Smithsonian Pictures\NOVA-DC-MD\Juvenile\17014	PXL_20230201_185033035.dng	1093
FieldData\Smithsonian Pictures\NOVA-DC-MD\Juvenile\17014	PXL_20230201_185033831.dng	1094
FieldData\Smithsonian Pictures\NOVA-DC-MD\Juvenile\17375	PXL_20230201_190150085.dng	1095
FieldData\Smithsonian Pictures\NOVA-DC-MD\Juvenile\17375	PXL_20230201_190205664.dng	1096
FieldData\Smithsonian Pictures\NOVA-DC-MD\Juvenile\17375	PXL_20230201_190224816.dng	1097
FieldData\Smithsonian Pictures\NOVA-DC-MD\Juvenile\17375	PXL_20230201_190225636.dng	1098
FieldData\Smithsonian Pictures\NOVA-DC-MD\Juvenile\17375	PXL_20230201_190235215.dng	1099
FieldData\Smithsonian Pictures\NOVA-DC-MD\Juvenile\17375	PXL_20230201_190235877.dng	1100
FieldData\Smithsonian Pictures\NOVA-DC-MD\Juvenile\17375	PXL_20230201_190252640.dng	1101
FieldData\Smithsonian Pictures\NOVA-DC-MD\Juvenile\17375	PXL_20230201_190253375.dng	1102
FieldData\Smithsonian Pictures\NOVA-DC-MD\Juvenile\17375	PXL_20230201_190307354.dng	1103
FieldData\Smithsonian Pictures\NOVA-DC-MD\Juvenile\17375	PXL_20230201_190307935.dng	1104
FieldData\Smithsonian Pictures\NOVA-DC-MD\Juvenile\17461	PXL_20230201_190810450.dng	1105
FieldData\Smithsonian Pictures\NOVA-DC-MD\Juvenile\17461	PXL_20230201_190815759.dng	1106
FieldData\Smithsonian Pictures\NOVA-DC-MD\Juvenile\17461	PXL_20230201_190837987.dng	1107
FieldData\Smithsonian Pictures\NOVA-DC-MD\Juvenile\17461	PXL_20230201_190838696.dng	1108
FieldData\Smithsonian Pictures\NOVA-DC-MD\Juvenile\17461	PXL_20230201_190849544.dng	1109
FieldData\Smithsonian Pictures\NOVA-DC-MD\Juvenile\17461	PXL_20230201_190850915.dng	1110
FieldData\Smithsonian Pictures\NOVA-DC-MD\Juvenile\17461	PXL_20230201_190859438.dng	1111
FieldData\Smithsonian Pictures\NOVA-DC-MD\Juvenile\17461	PXL_20230201_190900667.dng	1112
FieldData\Smithsonian Pictures\NOVA-DC-MD\Juvenile\17461	PXL_20230201_190906927.dng	1113
FieldData\Smithsonian Pictures\NOVA-DC-MD\Juvenile\17461	PXL_20230201_190907735.dng	1114
FieldData\Smithsonian Pictures\NOVA-DC-MD\Juvenile\19034	PXL_20230201_192723482.jpg	1115
FieldData\Smithsonian Pictures\NOVA-DC-MD\Juvenile\19034	PXL_20230201_192729083.jpg	1116
FieldData\Smithsonian Pictures\NOVA-DC-MD\Juvenile\19034	PXL_20230201_192748504.jpg	1117
FieldData\Smithsonian Pictures\NOVA-DC-MD\Juvenile\19034	PXL_20230201_192749119.jpg	1118
FieldData\Smithsonian Pictures\NOVA-DC-MD\Juvenile\19034	PXL_20230201_192757078.jpg	1119
FieldData\Smithsonian Pictures\NOVA-DC-MD\Juvenile\19034	PXL_20230201_192757678.jpg	1120
FieldData\Smithsonian Pictures\NOVA-DC-MD\Juvenile\19034	PXL_20230201_192805414.jpg	1121
FieldData\Smithsonian Pictures\NOVA-DC-MD\Juvenile\19034	PXL_20230201_192805936.jpg	1122
FieldData\Smithsonian Pictures\NOVA-DC-MD\Juvenile\19034	PXL_20230201_192815707.jpg	1123
FieldData\Smithsonian Pictures\NOVA-DC-MD\Juvenile\19034	PXL_20230201_192816303.jpg	1124
FieldData\Smithsonian Pictures\NOVA-DC-MD\Juvenile\19036	PXL_20230201_192352577.dng	1125
FieldData\Smithsonian Pictures\NOVA-DC-MD\Juvenile\19036	PXL_20230201_192355370.dng	1126
FieldData\Smithsonian Pictures\NOVA-DC-MD\Juvenile\19036	PXL_20230201_192404028.dng	1127
FieldData\Smithsonian Pictures\NOVA-DC-MD\Juvenile\19036	PXL_20230201_192404660.dng	1128
FieldData\Smithsonian Pictures\NOVA-DC-MD\Juvenile\19036	PXL_20230201_192411073.dng	1129
FieldData\Smithsonian Pictures\NOVA-DC-MD\Juvenile\19036	PXL_20230201_192411840.dng	1130
FieldData\Smithsonian Pictures\NOVA-DC-MD\Juvenile\19036	PXL_20230201_192419583.dng	1131
FieldData\Smithsonian Pictures\NOVA-DC-MD\Juvenile\19036	PXL_20230201_192420345.dng	1132
FieldData\Smithsonian Pictures\NOVA-DC-MD\Juvenile\19036	PXL_20230201_192428110.dng	1133
FieldData\Smithsonian Pictures\NOVA-DC-MD\Juvenile\19036	PXL_20230201_192428749.dng	1134
FieldData\Smithsonian Pictures\NOVA-DC-MD\Juvenile\22290	PXL_20230201_194418792.dng	1135
FieldData\Smithsonian Pictures\NOVA-DC-MD\Juvenile\22290	PXL_20230201_194421617.dng	1136
FieldData\Smithsonian Pictures\NOVA-DC-MD\Juvenile\22290	PXL_20230201_194432206.dng	1137
FieldData\Smithsonian Pictures\NOVA-DC-MD\Juvenile\22290	PXL_20230201_194433049.dng	1138
FieldData\Smithsonian Pictures\NOVA-DC-MD\Juvenile\22290	PXL_20230201_194440314.dng	1139
FieldData\Smithsonian Pictures\NOVA-DC-MD\Juvenile\22290	PXL_20230201_194440976.dng	1140
FieldData\Smithsonian Pictures\NOVA-DC-MD\Juvenile\22290	PXL_20230201_194447798.dng	1141
FieldData\Smithsonian Pictures\NOVA-DC-MD\Juvenile\22290	PXL_20230201_194448411.dng	1142
FieldData\Smithsonian Pictures\NOVA-DC-MD\Juvenile\22290	PXL_20230201_194455087.dng	1143
FieldData\Smithsonian Pictures\NOVA-DC-MD\Juvenile\22290	PXL_20230201_194455728.dng	1144
FieldData\Smithsonian Pictures\NOVA-DC-MD\Juvenile\22291	PXL_20230201_194028310.dng	1145
FieldData\Smithsonian Pictures\NOVA-DC-MD\Juvenile\22291	PXL_20230201_194030621.dng	1146
FieldData\Smithsonian Pictures\NOVA-DC-MD\Juvenile\22291	PXL_20230201_194045175.dng	1147
FieldData\Smithsonian Pictures\NOVA-DC-MD\Juvenile\22291	PXL_20230201_194046015.dng	1148
FieldData\Smithsonian Pictures\NOVA-DC-MD\Juvenile\22291	PXL_20230201_194058957.dng	1149
FieldData\Smithsonian Pictures\NOVA-DC-MD\Juvenile\22291	PXL_20230201_194100139.dng	1150
FieldData\Smithsonian Pictures\NOVA-DC-MD\Juvenile\22291	PXL_20230201_194112757.dng	1151
FieldData\Smithsonian Pictures\NOVA-DC-MD\Juvenile\22291	PXL_20230201_194113533.dng	1152
FieldData\Smithsonian Pictures\NOVA-DC-MD\Juvenile\22291	PXL_20230201_194121902.dng	1153
FieldData\Smithsonian Pictures\NOVA-DC-MD\Juvenile\22291	PXL_20230201_194122875.dng	1154
FieldData\Smithsonian Pictures\NOVA-DC-MD\Juvenile\22465	PXL_20230201_200721168.dng	1155
FieldData\Smithsonian Pictures\NOVA-DC-MD\Juvenile\22465	PXL_20230201_200723765.dng	1156
FieldData\Smithsonian Pictures\NOVA-DC-MD\Juvenile\22465	PXL_20230201_200737939.dng	1157
FieldData\Smithsonian Pictures\NOVA-DC-MD\Juvenile\22465	PXL_20230201_200738596.dng	1158
FieldData\Smithsonian Pictures\NOVA-DC-MD\Juvenile\22465	PXL_20230201_200749463.dng	1159
FieldData\Smithsonian Pictures\NOVA-DC-MD\Juvenile\22465	PXL_20230201_200750053.dng	1160
FieldData\Smithsonian Pictures\NOVA-DC-MD\Juvenile\22465	PXL_20230201_200800698.dng	1161
FieldData\Smithsonian Pictures\NOVA-DC-MD\Juvenile\22465	PXL_20230201_200801876.dng	1162
FieldData\Smithsonian Pictures\NOVA-DC-MD\Juvenile\22465	PXL_20230201_200812208.dng	1163
FieldData\Smithsonian Pictures\NOVA-DC-MD\Juvenile\22465	PXL_20230201_200812994.dng	1164
FieldData\Smithsonian Pictures\NOVA-DC-MD\Juvenile\230328	PXL_20230131_204012746.dng	1165
FieldData\Smithsonian Pictures\NOVA-DC-MD\Juvenile\230328	PXL_20230131_204014212.dng	1166
FieldData\Smithsonian Pictures\NOVA-DC-MD\Juvenile\230328	PXL_20230131_204029672.dng	1167
FieldData\Smithsonian Pictures\NOVA-DC-MD\Juvenile\230328	PXL_20230131_204030809.dng	1168
FieldData\Smithsonian Pictures\NOVA-DC-MD\Juvenile\230328	PXL_20230131_204038543.dng	1169
FieldData\Smithsonian Pictures\NOVA-DC-MD\Juvenile\230328	PXL_20230131_204039744.dng	1170
FieldData\Smithsonian Pictures\NOVA-DC-MD\Juvenile\230328	PXL_20230131_204047774.dng	1171
FieldData\Smithsonian Pictures\NOVA-DC-MD\Juvenile\230328	PXL_20230131_204048887.dng	1172
FieldData\Smithsonian Pictures\NOVA-DC-MD\Juvenile\230328	PXL_20230131_204055996.dng	1173
FieldData\Smithsonian Pictures\NOVA-DC-MD\Juvenile\230328	PXL_20230131_204056951.dng	1174
FieldData\Smithsonian Pictures\NOVA-DC-MD\Juvenile\26172	PXL_20230201_204511533.dng	1175
FieldData\Smithsonian Pictures\NOVA-DC-MD\Juvenile\26172	PXL_20230201_204514821.dng	1176
FieldData\Smithsonian Pictures\NOVA-DC-MD\Juvenile\26172	PXL_20230201_204528072.dng	1177
FieldData\Smithsonian Pictures\NOVA-DC-MD\Juvenile\26172	PXL_20230201_204528838.dng	1178
FieldData\Smithsonian Pictures\NOVA-DC-MD\Juvenile\26172	PXL_20230201_204536533.dng	1179
FieldData\Smithsonian Pictures\NOVA-DC-MD\Juvenile\26172	PXL_20230201_204537240.dng	1180
FieldData\Smithsonian Pictures\NOVA-DC-MD\Juvenile\26172	PXL_20230201_204544946.dng	1181
FieldData\Smithsonian Pictures\NOVA-DC-MD\Juvenile\26172	PXL_20230201_204545512.dng	1182
FieldData\Smithsonian Pictures\NOVA-DC-MD\Juvenile\26172	PXL_20230201_204553019.dng	1183
FieldData\Smithsonian Pictures\NOVA-DC-MD\Juvenile\26172	PXL_20230201_204553713.dng	1184
FieldData\Smithsonian Pictures\NOVA-DC-MD\Juvenile\26173	PXL_20230201_204511533.dng	1185
FieldData\Smithsonian Pictures\NOVA-DC-MD\Juvenile\26173	PXL_20230201_204514821.dng	1186
FieldData\Smithsonian Pictures\NOVA-DC-MD\Juvenile\26173	PXL_20230201_204528072.dng	1187
FieldData\Smithsonian Pictures\NOVA-DC-MD\Juvenile\26173	PXL_20230201_204536533.dng	1188
FieldData\Smithsonian Pictures\NOVA-DC-MD\Juvenile\26173	PXL_20230201_204537240.dng	1189
FieldData\Smithsonian Pictures\NOVA-DC-MD\Juvenile\26173	PXL_20230201_204544946.dng	1190
FieldData\Smithsonian Pictures\NOVA-DC-MD\Juvenile\26173	PXL_20230201_204545512.dng	1191
FieldData\Smithsonian Pictures\NOVA-DC-MD\Juvenile\26173	PXL_20230201_204553019.dng	1192
FieldData\Smithsonian Pictures\NOVA-DC-MD\Juvenile\26173	PXL_20230201_204553713.dng	1193
FieldData\Smithsonian Pictures\NOVA-DC-MD\Juvenile\374959	PXL_20230208_195340167.dng	1194
FieldData\Smithsonian Pictures\NOVA-DC-MD\Juvenile\374959	PXL_20230208_195343081.dng	1195
FieldData\Smithsonian Pictures\NOVA-DC-MD\Juvenile\374959	PXL_20230208_195345123.dng	1196
FieldData\Smithsonian Pictures\NOVA-DC-MD\Juvenile\374959	PXL_20230208_195357132.dng	1197
FieldData\Smithsonian Pictures\NOVA-DC-MD\Juvenile\374959	PXL_20230208_195358120.dng	1198
FieldData\Smithsonian Pictures\NOVA-DC-MD\Juvenile\374959	PXL_20230208_195408817.dng	1199
FieldData\Smithsonian Pictures\NOVA-DC-MD\Juvenile\374959	PXL_20230208_195409876.dng	1200
FieldData\Smithsonian Pictures\NOVA-DC-MD\Juvenile\374959	PXL_20230208_195420277.dng	1201
FieldData\Smithsonian Pictures\NOVA-DC-MD\Juvenile\374959	PXL_20230208_195421042.dng	1202
FieldData\Smithsonian Pictures\NOVA-DC-MD\Juvenile\374959	PXL_20230208_195431206.dng	1203
FieldData\Smithsonian Pictures\NOVA-DC-MD\Juvenile\374959	PXL_20230208_195432405.dng	1204
FieldData\Smithsonian Pictures\NOVA-DC-MD\Juvenile\37783	PXL_20230201_205820085.dng	1205
FieldData\Smithsonian Pictures\NOVA-DC-MD\Juvenile\37783	PXL_20230201_205821801.dng	1206
FieldData\Smithsonian Pictures\NOVA-DC-MD\Juvenile\37783	PXL_20230201_205844316.dng	1207
FieldData\Smithsonian Pictures\NOVA-DC-MD\Juvenile\37783	PXL_20230201_205845359.dng	1208
FieldData\Smithsonian Pictures\NOVA-DC-MD\Juvenile\37783	PXL_20230201_205900473.dng	1209
FieldData\Smithsonian Pictures\NOVA-DC-MD\Juvenile\37783	PXL_20230201_205901059.dng	1210
FieldData\Smithsonian Pictures\NOVA-DC-MD\Juvenile\37783	PXL_20230201_205908834.dng	1211
FieldData\Smithsonian Pictures\NOVA-DC-MD\Juvenile\37783	PXL_20230201_205909352.dng	1212
FieldData\Smithsonian Pictures\NOVA-DC-MD\Juvenile\37783	PXL_20230201_205919157.dng	1213
FieldData\Smithsonian Pictures\NOVA-DC-MD\Juvenile\37783	PXL_20230201_205920233.dng	1214
FieldData\Smithsonian Pictures\NOVA-DC-MD\Juvenile\38891	PXL_20230214_183108609.dng	1215
FieldData\Smithsonian Pictures\NOVA-DC-MD\Juvenile\38891	PXL_20230214_183110879.dng	1216
FieldData\Smithsonian Pictures\NOVA-DC-MD\Juvenile\38891	PXL_20230214_183112588.dng	1217
FieldData\Smithsonian Pictures\NOVA-DC-MD\Juvenile\38891	PXL_20230214_183149533.dng	1218
FieldData\Smithsonian Pictures\NOVA-DC-MD\Juvenile\38891	PXL_20230214_183150479.dng	1219
FieldData\Smithsonian Pictures\NOVA-DC-MD\Juvenile\38891	PXL_20230214_183158336.dng	1220
FieldData\Smithsonian Pictures\NOVA-DC-MD\Juvenile\38891	PXL_20230214_183159107.dng	1221
FieldData\Smithsonian Pictures\NOVA-DC-MD\Juvenile\38891	PXL_20230214_183215599.dng	1222
FieldData\Smithsonian Pictures\NOVA-DC-MD\Juvenile\38891	PXL_20230214_183216348.dng	1223
FieldData\Smithsonian Pictures\NOVA-DC-MD\Juvenile\38891	PXL_20230214_183229940.dng	1224
FieldData\Smithsonian Pictures\NOVA-DC-MD\Juvenile\38891	PXL_20230214_183231070.dng	1225
FieldData\Smithsonian Pictures\NOVA-DC-MD\Juvenile\38892	PXL_20230214_182848686.dng	1226
FieldData\Smithsonian Pictures\NOVA-DC-MD\Juvenile\38892	PXL_20230214_182851966.dng	1227
FieldData\Smithsonian Pictures\NOVA-DC-MD\Juvenile\38892	PXL_20230214_182853221.dng	1228
FieldData\Smithsonian Pictures\NOVA-DC-MD\Juvenile\38892	PXL_20230214_182912298.dng	1229
FieldData\Smithsonian Pictures\NOVA-DC-MD\Juvenile\38892	PXL_20230214_182913106.dng	1230
FieldData\Smithsonian Pictures\NOVA-DC-MD\Juvenile\38892	PXL_20230214_182926485.dng	1231
FieldData\Smithsonian Pictures\NOVA-DC-MD\Juvenile\38892	PXL_20230214_182927078.dng	1232
FieldData\Smithsonian Pictures\NOVA-DC-MD\Juvenile\38892	PXL_20230214_182945520.dng	1233
FieldData\Smithsonian Pictures\NOVA-DC-MD\Juvenile\38892	PXL_20230214_182946313.dng	1234
FieldData\Smithsonian Pictures\NOVA-DC-MD\Juvenile\38892	PXL_20230214_183002142.dng	1235
FieldData\Smithsonian Pictures\NOVA-DC-MD\Juvenile\38892	PXL_20230214_183004377.dng	1236
FieldData\Smithsonian Pictures\NOVA-DC-MD\Juvenile\45780	PXL_20230125_192823113.dng	1237
FieldData\Smithsonian Pictures\NOVA-DC-MD\Juvenile\45780	PXL_20230125_192825451.dng	1238
FieldData\Smithsonian Pictures\NOVA-DC-MD\Juvenile\45780	PXL_20230125_192839875.dng	1239
FieldData\Smithsonian Pictures\NOVA-DC-MD\Juvenile\45780	PXL_20230125_192840832.dng	1240
FieldData\Smithsonian Pictures\NOVA-DC-MD\Juvenile\45780	PXL_20230125_192849137.dng	1241
FieldData\Smithsonian Pictures\NOVA-DC-MD\Juvenile\45780	PXL_20230125_192849939.dng	1242
FieldData\Smithsonian Pictures\NOVA-DC-MD\Juvenile\45780	PXL_20230125_192902121.dng	1243
FieldData\Smithsonian Pictures\NOVA-DC-MD\Juvenile\45780	PXL_20230125_192902907.dng	1244
FieldData\Smithsonian Pictures\NOVA-DC-MD\Juvenile\45780	PXL_20230125_192913379.dng	1245
FieldData\Smithsonian Pictures\NOVA-DC-MD\Juvenile\45780	PXL_20230125_192914078.dng	1246
FieldData\Smithsonian Pictures\NOVA-DC-MD\Juvenile\45781	PXL_20230125_192422408.dng	1247
FieldData\Smithsonian Pictures\NOVA-DC-MD\Juvenile\45781	PXL_20230125_192424035.dng	1248
FieldData\Smithsonian Pictures\NOVA-DC-MD\Juvenile\45781	PXL_20230125_192436360.dng	1249
FieldData\Smithsonian Pictures\NOVA-DC-MD\Juvenile\45781	PXL_20230125_192438526.dng	1250
FieldData\Smithsonian Pictures\NOVA-DC-MD\Juvenile\45781	PXL_20230125_192448316.dng	1251
FieldData\Smithsonian Pictures\NOVA-DC-MD\Juvenile\45781	PXL_20230125_192449133.dng	1252
FieldData\Smithsonian Pictures\NOVA-DC-MD\Juvenile\45781	PXL_20230125_192457695.dng	1253
FieldData\Smithsonian Pictures\NOVA-DC-MD\Juvenile\45781	PXL_20230125_192458393.dng	1254
FieldData\Smithsonian Pictures\NOVA-DC-MD\Juvenile\45781	PXL_20230125_192506652.dng	1255
FieldData\Smithsonian Pictures\NOVA-DC-MD\Juvenile\45781	PXL_20230125_192507440.dng	1256
FieldData\Smithsonian Pictures\NOVA-DC-MD\Juvenile\48676	PXL_20230125_193420719.dng	1257
FieldData\Smithsonian Pictures\NOVA-DC-MD\Juvenile\48676	PXL_20230125_193421768.dng	1258
FieldData\Smithsonian Pictures\NOVA-DC-MD\Juvenile\48676	PXL_20230125_193441838.dng	1259
FieldData\Smithsonian Pictures\NOVA-DC-MD\Juvenile\48676	PXL_20230125_193443686.dng	1260
FieldData\Smithsonian Pictures\NOVA-DC-MD\Juvenile\48676	PXL_20230125_193457383.dng	1261
FieldData\Smithsonian Pictures\NOVA-DC-MD\Juvenile\48676	PXL_20230125_193458204.dng	1262
FieldData\Smithsonian Pictures\NOVA-DC-MD\Juvenile\48676	PXL_20230125_193508835.dng	1263
FieldData\Smithsonian Pictures\NOVA-DC-MD\Juvenile\48676	PXL_20230125_193509617.dng	1264
FieldData\Smithsonian Pictures\NOVA-DC-MD\Juvenile\48676	PXL_20230125_193527146.dng	1265
FieldData\Smithsonian Pictures\NOVA-DC-MD\Juvenile\48676	PXL_20230125_193528158.dng	1266
FieldData\Smithsonian Pictures\NOVA-DC-MD\Juvenile\49960	PXL_20230125_194731802.dng	1267
FieldData\Smithsonian Pictures\NOVA-DC-MD\Juvenile\49960	PXL_20230125_194732699.dng	1268
FieldData\Smithsonian Pictures\NOVA-DC-MD\Juvenile\49960	PXL_20230125_194747062.dng	1269
FieldData\Smithsonian Pictures\NOVA-DC-MD\Juvenile\49960	PXL_20230125_194748384.dng	1270
FieldData\Smithsonian Pictures\NOVA-DC-MD\Juvenile\49960	PXL_20230125_194802004.dng	1271
FieldData\Smithsonian Pictures\NOVA-DC-MD\Juvenile\49960	PXL_20230125_194802938.dng	1272
FieldData\Smithsonian Pictures\NOVA-DC-MD\Juvenile\49960	PXL_20230125_194810953.dng	1273
FieldData\Smithsonian Pictures\NOVA-DC-MD\Juvenile\49960	PXL_20230125_194811691.dng	1274
FieldData\Smithsonian Pictures\NOVA-DC-MD\Juvenile\49960	PXL_20230125_194824836.dng	1275
FieldData\Smithsonian Pictures\NOVA-DC-MD\Juvenile\49960	PXL_20230125_194825592.dng	1276
FieldData\Smithsonian Pictures\NOVA-DC-MD\Juvenile\54749	PXL_20230125_200134995.dng	1277
FieldData\Smithsonian Pictures\NOVA-DC-MD\Juvenile\54749	PXL_20230125_200135907.dng	1278
FieldData\Smithsonian Pictures\NOVA-DC-MD\Juvenile\54749	PXL_20230125_200158178.dng	1279
FieldData\Smithsonian Pictures\NOVA-DC-MD\Juvenile\54749	PXL_20230125_200159107.dng	1280
FieldData\Smithsonian Pictures\NOVA-DC-MD\Juvenile\54749	PXL_20230125_200208349.dng	1281
FieldData\Smithsonian Pictures\NOVA-DC-MD\Juvenile\54749	PXL_20230125_200209136.dng	1282
FieldData\Smithsonian Pictures\NOVA-DC-MD\Juvenile\54749	PXL_20230125_200217530.dng	1283
FieldData\Smithsonian Pictures\NOVA-DC-MD\Juvenile\54749	PXL_20230125_200218118.dng	1284
FieldData\Smithsonian Pictures\NOVA-DC-MD\Juvenile\54749	PXL_20230125_200227966.dng	1285
FieldData\Smithsonian Pictures\NOVA-DC-MD\Juvenile\54749	PXL_20230125_200229472.dng	1286
FieldData\Smithsonian Pictures\NOVA-DC-MD\Juvenile\54750	PXL_20230125_200654568.dng	1287
FieldData\Smithsonian Pictures\NOVA-DC-MD\Juvenile\54750	PXL_20230207_205338957.dng	1288
FieldData\Smithsonian Pictures\NOVA-DC-MD\Juvenile\54750	PXL_20230207_205339822.dng	1289
FieldData\Smithsonian Pictures\NOVA-DC-MD\Juvenile\54750	PXL_20230207_205421955.dng	1290
FieldData\Smithsonian Pictures\NOVA-DC-MD\Juvenile\54750	PXL_20230207_205422591.dng	1291
FieldData\Smithsonian Pictures\NOVA-DC-MD\Juvenile\54750	PXL_20230207_205437590.dng	1292
FieldData\Smithsonian Pictures\NOVA-DC-MD\Juvenile\54750	PXL_20230207_205438431.dng	1293
FieldData\Smithsonian Pictures\NOVA-DC-MD\Juvenile\54750	aPXL_20230207_205316926.dng	1294
FieldData\Smithsonian Pictures\NOVA-DC-MD\Juvenile\54750	aPXL_20230207_205321137.dng	1295
FieldData\Smithsonian Pictures\NOVA-DC-MD\Juvenile\54750	bPXL_20230207_205409728.dng	1296
FieldData\Smithsonian Pictures\NOVA-DC-MD\Juvenile\54751	PXL_20230125_201120820(1).dng	1297
FieldData\Smithsonian Pictures\NOVA-DC-MD\Juvenile\54751	PXL_20230125_201120820.dng	1298
FieldData\Smithsonian Pictures\NOVA-DC-MD\Juvenile\54751	PXL_20230125_201121995.dng	1299
FieldData\Smithsonian Pictures\NOVA-DC-MD\Juvenile\54751	PXL_20230125_201138425.dng	1300
FieldData\Smithsonian Pictures\NOVA-DC-MD\Juvenile\54751	PXL_20230125_201139683.dng	1301
FieldData\Smithsonian Pictures\NOVA-DC-MD\Juvenile\54751	PXL_20230125_201147132.dng	1302
FieldData\Smithsonian Pictures\NOVA-DC-MD\Juvenile\54751	PXL_20230125_201147899.dng	1303
FieldData\Smithsonian Pictures\NOVA-DC-MD\Juvenile\54751	PXL_20230125_201201188.dng	1304
FieldData\Smithsonian Pictures\NOVA-DC-MD\Juvenile\54751	PXL_20230125_201201989.dng	1305
FieldData\Smithsonian Pictures\NOVA-DC-MD\Juvenile\54751	PXL_20230125_201210990.dng	1306
FieldData\Smithsonian Pictures\NOVA-DC-MD\Juvenile\54751	PXL_20230125_201211873.dng	1307
FieldData\Smithsonian Pictures\NOVA-DC-MD\Juvenile\588439	PXL_20230210_184104970.dng	1308
FieldData\Smithsonian Pictures\NOVA-DC-MD\Juvenile\588439	PXL_20230210_184106598.dng	1309
FieldData\Smithsonian Pictures\NOVA-DC-MD\Juvenile\588439	PXL_20230210_184108589.dng	1310
FieldData\Smithsonian Pictures\NOVA-DC-MD\Juvenile\588439	PXL_20230210_184124146.dng	1311
FieldData\Smithsonian Pictures\NOVA-DC-MD\Juvenile\588439	PXL_20230210_184124800.dng	1312
FieldData\Smithsonian Pictures\NOVA-DC-MD\Juvenile\588439	PXL_20230210_184131906.dng	1313
FieldData\Smithsonian Pictures\NOVA-DC-MD\Juvenile\588439	PXL_20230210_184132723.dng	1314
FieldData\Smithsonian Pictures\NOVA-DC-MD\Juvenile\588439	PXL_20230210_184146941.dng	1315
FieldData\Smithsonian Pictures\NOVA-DC-MD\Juvenile\588439	PXL_20230210_184147624.dng	1316
FieldData\Smithsonian Pictures\NOVA-DC-MD\Juvenile\588439	PXL_20230210_184158444.dng	1317
FieldData\Smithsonian Pictures\NOVA-DC-MD\Juvenile\588439	PXL_20230210_184159441.dng	1318
FieldData\Smithsonian Pictures\NOVA-DC-MD\Juvenile\62012	PXL_20230125_201653868.dng	1319
FieldData\Smithsonian Pictures\NOVA-DC-MD\Juvenile\62012	PXL_20230125_201655583.dng	1320
FieldData\Smithsonian Pictures\NOVA-DC-MD\Juvenile\62012	PXL_20230125_201704757.dng	1321
FieldData\Smithsonian Pictures\NOVA-DC-MD\Juvenile\62012	PXL_20230125_201705416.dng	1322
FieldData\Smithsonian Pictures\NOVA-DC-MD\Juvenile\62012	PXL_20230125_201719065.dng	1323
FieldData\Smithsonian Pictures\NOVA-DC-MD\Juvenile\62012	PXL_20230125_201719930.dng	1324
FieldData\Smithsonian Pictures\NOVA-DC-MD\Juvenile\62012	PXL_20230125_201729717.dng	1325
FieldData\Smithsonian Pictures\NOVA-DC-MD\Juvenile\62012	PXL_20230125_201730597.dng	1326
FieldData\Smithsonian Pictures\NOVA-DC-MD\Juvenile\62012	aPXL_20230214_200602005.dng	1327
FieldData\Smithsonian Pictures\NOVA-DC-MD\Juvenile\62012	aPXL_20230214_200603374.dng	1328
FieldData\Smithsonian Pictures\NOVA-DC-MD\Juvenile\62012	aPXL_20230214_200605505.dng	1329
FieldData\Smithsonian Pictures\NOVA-DC-MD\Juvenile\67771	PXL_20230131_164120152.dng	1330
FieldData\Smithsonian Pictures\NOVA-DC-MD\Juvenile\67771	PXL_20230131_164123076.dng	1331
FieldData\Smithsonian Pictures\NOVA-DC-MD\Juvenile\67771	PXL_20230131_184559142.dng	1332
FieldData\Smithsonian Pictures\NOVA-DC-MD\Juvenile\67771	PXL_20230131_184618963.dng	1333
FieldData\Smithsonian Pictures\NOVA-DC-MD\Juvenile\67771	PXL_20230131_184620116.dng	1334
FieldData\Smithsonian Pictures\NOVA-DC-MD\Juvenile\67771	PXL_20230131_184626171.dng	1335
FieldData\Smithsonian Pictures\NOVA-DC-MD\Juvenile\67771	PXL_20230131_184627058.dng	1336
FieldData\Smithsonian Pictures\NOVA-DC-MD\Juvenile\67771	PXL_20230131_184632216.dng	1337
FieldData\Smithsonian Pictures\NOVA-DC-MD\Juvenile\67771	PXL_20230131_184633303.dng	1338
FieldData\Smithsonian Pictures\NOVA-DC-MD\Juvenile\67771	PXL_20230131_184638971.dng	1339
FieldData\Smithsonian Pictures\NOVA-DC-MD\Juvenile\67771	PXL_20230131_184639916.dng	1340
FieldData\Smithsonian Pictures\NOVA-DC-MD\Juvenile\67772	PXL_20230131_191236058.dng	1341
FieldData\Smithsonian Pictures\NOVA-DC-MD\Juvenile\67772	PXL_20230131_191238130.dng	1342
FieldData\Smithsonian Pictures\NOVA-DC-MD\Juvenile\67772	PXL_20230131_191242804.dng	1343
FieldData\Smithsonian Pictures\NOVA-DC-MD\Juvenile\67772	PXL_20230131_191255669.dng	1344
FieldData\Smithsonian Pictures\NOVA-DC-MD\Juvenile\67772	PXL_20230131_191256998.dng	1345
FieldData\Smithsonian Pictures\NOVA-DC-MD\Juvenile\67772	PXL_20230131_191308430.dng	1346
FieldData\Smithsonian Pictures\NOVA-DC-MD\Juvenile\67772	PXL_20230131_191309250.dng	1347
FieldData\Smithsonian Pictures\NOVA-DC-MD\Juvenile\67772	PXL_20230131_191318660.dng	1348
FieldData\Smithsonian Pictures\NOVA-DC-MD\Juvenile\67772	PXL_20230131_191320130.dng	1349
FieldData\Smithsonian Pictures\NOVA-DC-MD\Juvenile\67772	PXL_20230131_191332687.dng	1350
FieldData\Smithsonian Pictures\NOVA-DC-MD\Juvenile\67772	PXL_20230131_191333460.dng	1351
FieldData\Smithsonian Pictures\NOVA-DC-MD\Juvenile\67773	PXL_20230131_190141629.dng	1352
FieldData\Smithsonian Pictures\NOVA-DC-MD\Juvenile\67773	PXL_20230131_190150163.dng	1353
FieldData\Smithsonian Pictures\NOVA-DC-MD\Juvenile\67773	PXL_20230131_190152779.dng	1354
FieldData\Smithsonian Pictures\NOVA-DC-MD\Juvenile\67773	PXL_20230131_190204754.dng	1355
FieldData\Smithsonian Pictures\NOVA-DC-MD\Juvenile\67773	PXL_20230131_190205866.dng	1356
FieldData\Smithsonian Pictures\NOVA-DC-MD\Juvenile\67773	PXL_20230131_190213844.dng	1357
FieldData\Smithsonian Pictures\NOVA-DC-MD\Juvenile\67773	PXL_20230131_190214647.dng	1358
FieldData\Smithsonian Pictures\NOVA-DC-MD\Juvenile\67773	PXL_20230131_190224593.dng	1359
FieldData\Smithsonian Pictures\NOVA-DC-MD\Juvenile\67773	PXL_20230131_190225971.dng	1360
FieldData\Smithsonian Pictures\NOVA-DC-MD\Juvenile\67773	PXL_20230131_190234745.dng	1361
FieldData\Smithsonian Pictures\NOVA-DC-MD\Juvenile\67773	PXL_20230131_190235497.dng	1362
FieldData\Smithsonian Pictures\NOVA-DC-MD\Juvenile\80304	PXL_20230131_191911274.dng	1363
FieldData\Smithsonian Pictures\NOVA-DC-MD\Juvenile\80304	PXL_20230131_191914601.dng	1364
FieldData\Smithsonian Pictures\NOVA-DC-MD\Juvenile\80304	PXL_20230131_191939870.dng	1365
FieldData\Smithsonian Pictures\NOVA-DC-MD\Juvenile\80304	PXL_20230131_191943543.dng	1366
FieldData\Smithsonian Pictures\NOVA-DC-MD\Juvenile\80304	PXL_20230131_191956693.dng	1367
FieldData\Smithsonian Pictures\NOVA-DC-MD\Juvenile\80304	PXL_20230131_191957502.dng	1368
FieldData\Smithsonian Pictures\NOVA-DC-MD\Juvenile\80304	PXL_20230131_192006054.dng	1369
FieldData\Smithsonian Pictures\NOVA-DC-MD\Juvenile\80304	PXL_20230131_192006900.dng	1370
FieldData\Smithsonian Pictures\NOVA-DC-MD\Juvenile\80304	PXL_20230131_192020373.dng	1371
FieldData\Smithsonian Pictures\NOVA-DC-MD\Juvenile\80304	PXL_20230131_192021188.dng	1372
FieldData\Smithsonian Pictures\Southern VA\Adult\497232	PXL_20230208_194219613.dng	1373
FieldData\Smithsonian Pictures\Southern VA\Adult\497232	PXL_20230208_194222987.dng	1374
FieldData\Smithsonian Pictures\Southern VA\Adult\497232	PXL_20230208_194226015.dng	1375
FieldData\Smithsonian Pictures\Southern VA\Adult\497232	PXL_20230208_194243767.dng	1376
FieldData\Smithsonian Pictures\Southern VA\Adult\497232	PXL_20230208_194245538.dng	1377
FieldData\Smithsonian Pictures\Southern VA\Adult\497232	PXL_20230208_194256341.dng	1378
FieldData\Smithsonian Pictures\Southern VA\Adult\497232	PXL_20230208_194256935.dng	1379
FieldData\Smithsonian Pictures\Southern VA\Adult\497232	PXL_20230208_194305393.dng	1380
FieldData\Smithsonian Pictures\Southern VA\Adult\497232	PXL_20230208_194306574.dng	1381
FieldData\Smithsonian Pictures\Southern VA\Adult\497232	PXL_20230208_194311979.dng	1382
FieldData\Smithsonian Pictures\Southern VA\Adult\497232	PXL_20230208_194313877.dng	1383
FieldData\Smithsonian Pictures\Southern VA\Adult\497235	PXL_20230208_191741972.dng	1384
FieldData\Smithsonian Pictures\Southern VA\Adult\497235	PXL_20230208_191744520.dng	1385
FieldData\Smithsonian Pictures\Southern VA\Adult\497235	PXL_20230208_191746713.dng	1386
FieldData\Smithsonian Pictures\Southern VA\Adult\497235	PXL_20230208_191755290.dng	1387
FieldData\Smithsonian Pictures\Southern VA\Adult\497235	PXL_20230208_191756457.dng	1388
FieldData\Smithsonian Pictures\Southern VA\Adult\497235	PXL_20230208_191804649.dng	1389
FieldData\Smithsonian Pictures\Southern VA\Adult\497235	PXL_20230208_191805826.dng	1390
FieldData\Smithsonian Pictures\Southern VA\Adult\497235	PXL_20230208_191814169.dng	1391
FieldData\Smithsonian Pictures\Southern VA\Adult\497235	PXL_20230208_191814849.dng	1392
FieldData\Smithsonian Pictures\Southern VA\Adult\497235	PXL_20230208_191822873.dng	1393
FieldData\Smithsonian Pictures\Southern VA\Adult\497235	PXL_20230208_191823927.dng	1394
FieldData\Smithsonian Pictures\Southern VA\Adult\497236	PXL_20230208_191515510.dng	1395
FieldData\Smithsonian Pictures\Southern VA\Adult\497236	PXL_20230208_191520966.dng	1396
FieldData\Smithsonian Pictures\Southern VA\Adult\497236	PXL_20230208_191522815.dng	1397
FieldData\Smithsonian Pictures\Southern VA\Adult\497236	PXL_20230208_191537248.dng	1398
FieldData\Smithsonian Pictures\Southern VA\Adult\497236	PXL_20230208_191538500.dng	1399
FieldData\Smithsonian Pictures\Southern VA\Adult\497236	PXL_20230208_191546060.dng	1400
FieldData\Smithsonian Pictures\Southern VA\Adult\497236	PXL_20230208_191546854.dng	1401
FieldData\Smithsonian Pictures\Southern VA\Adult\497236	PXL_20230208_191554813.dng	1402
FieldData\Smithsonian Pictures\Southern VA\Adult\497236	PXL_20230208_191555884.dng	1403
FieldData\Smithsonian Pictures\Southern VA\Adult\497236	PXL_20230208_191604392.dng	1404
FieldData\Smithsonian Pictures\Southern VA\Adult\497236	PXL_20230208_191606850.dng	1405
FieldData\Smithsonian Pictures\Southern VA\Adult\497237	PXL_20230208_191248707.dng	1406
FieldData\Smithsonian Pictures\Southern VA\Adult\497237	PXL_20230208_191251934.dng	1407
FieldData\Smithsonian Pictures\Southern VA\Adult\497237	PXL_20230208_191253758.dng	1408
FieldData\Smithsonian Pictures\Southern VA\Adult\497237	PXL_20230208_191308131.dng	1409
FieldData\Smithsonian Pictures\Southern VA\Adult\497237	PXL_20230208_191309250.dng	1410
FieldData\Smithsonian Pictures\Southern VA\Adult\497237	PXL_20230208_191320472.dng	1411
FieldData\Smithsonian Pictures\Southern VA\Adult\497237	PXL_20230208_191322231.dng	1412
FieldData\Smithsonian Pictures\Southern VA\Adult\497237	PXL_20230208_191334978.dng	1413
FieldData\Smithsonian Pictures\Southern VA\Adult\497237	PXL_20230208_191335667.dng	1414
FieldData\Smithsonian Pictures\Southern VA\Adult\497237	PXL_20230208_191342624.dng	1415
FieldData\Smithsonian Pictures\Southern VA\Adult\497237	PXL_20230208_191344732.dng	1416
FieldData\Smithsonian Pictures\Southern VA\Adult\497246	PXL_20230208_190635763.dng	1417
FieldData\Smithsonian Pictures\Southern VA\Adult\497246	PXL_20230208_190638105.dng	1418
FieldData\Smithsonian Pictures\Southern VA\Adult\497246	PXL_20230208_190640600.dng	1419
FieldData\Smithsonian Pictures\Southern VA\Adult\497246	PXL_20230208_190701229.dng	1420
FieldData\Smithsonian Pictures\Southern VA\Adult\497246	PXL_20230208_190701865.dng	1421
FieldData\Smithsonian Pictures\Southern VA\Adult\497246	PXL_20230208_190714578.dng	1422
FieldData\Smithsonian Pictures\Southern VA\Adult\497246	PXL_20230208_190715395.dng	1423
FieldData\Smithsonian Pictures\Southern VA\Adult\497246	PXL_20230208_190723913.dng	1424
FieldData\Smithsonian Pictures\Southern VA\Adult\497246	PXL_20230208_190724655.dng	1425
FieldData\Smithsonian Pictures\Southern VA\Adult\497246	PXL_20230208_190731510.dng	1426
FieldData\Smithsonian Pictures\Southern VA\Adult\497246	PXL_20230208_190732281.dng	1427
FieldData\Smithsonian Pictures\Southern VA\Adult\497250	PXL_20230208_211848683.dng	1428
FieldData\Smithsonian Pictures\Southern VA\Adult\497250	PXL_20230208_211853932.dng	1429
FieldData\Smithsonian Pictures\Southern VA\Adult\497250	PXL_20230208_211855234.dng	1430
FieldData\Smithsonian Pictures\Southern VA\Adult\497250	PXL_20230208_211907244.dng	1431
FieldData\Smithsonian Pictures\Southern VA\Adult\497250	PXL_20230208_211908159.dng	1432
FieldData\Smithsonian Pictures\Southern VA\Adult\497250	PXL_20230208_211917541.dng	1433
FieldData\Smithsonian Pictures\Southern VA\Adult\497250	PXL_20230208_211918727.dng	1434
FieldData\Smithsonian Pictures\Southern VA\Adult\497250	PXL_20230208_211932147.dng	1435
FieldData\Smithsonian Pictures\Southern VA\Adult\497250	PXL_20230208_211934894.dng	1436
FieldData\Smithsonian Pictures\Southern VA\Adult\497250	PXL_20230208_211945732.dng	1437
FieldData\Smithsonian Pictures\Southern VA\Adult\497250	PXL_20230208_211946762.dng	1438
FieldData\Smithsonian Pictures\Southern VA\Adult\497251	PXL_20230208_212753933.dng	1439
FieldData\Smithsonian Pictures\Southern VA\Adult\497251	PXL_20230208_212756144.dng	1440
FieldData\Smithsonian Pictures\Southern VA\Adult\497251	PXL_20230208_212757283.dng	1441
FieldData\Smithsonian Pictures\Southern VA\Adult\497251	PXL_20230208_212808320.dng	1442
FieldData\Smithsonian Pictures\Southern VA\Adult\497251	PXL_20230208_212809073.dng	1443
FieldData\Smithsonian Pictures\Southern VA\Adult\497251	PXL_20230208_212815392.dng	1444
FieldData\Smithsonian Pictures\Southern VA\Adult\497251	PXL_20230208_212816164.dng	1445
FieldData\Smithsonian Pictures\Southern VA\Adult\497251	PXL_20230208_212825884.dng	1446
FieldData\Smithsonian Pictures\Southern VA\Adult\497251	PXL_20230208_212827700.dng	1447
FieldData\Smithsonian Pictures\Southern VA\Adult\497251	PXL_20230208_212834777.dng	1448
FieldData\Smithsonian Pictures\Southern VA\Adult\497251	PXL_20230208_212835520.dng	1449
FieldData\Smithsonian Pictures\Southern VA\Adult\497252	PXL_20230208_210721336.dng	1450
FieldData\Smithsonian Pictures\Southern VA\Adult\497252	PXL_20230208_210723180.dng	1451
FieldData\Smithsonian Pictures\Southern VA\Adult\497252	PXL_20230208_210724244.dng	1452
FieldData\Smithsonian Pictures\Southern VA\Adult\497252	PXL_20230208_210742258.dng	1453
FieldData\Smithsonian Pictures\Southern VA\Adult\497252	PXL_20230208_210742894.dng	1454
FieldData\Smithsonian Pictures\Southern VA\Adult\497252	PXL_20230208_210800447.dng	1455
FieldData\Smithsonian Pictures\Southern VA\Adult\497252	PXL_20230208_210801111.dng	1456
FieldData\Smithsonian Pictures\Southern VA\Adult\497252	PXL_20230208_210818949.dng	1457
FieldData\Smithsonian Pictures\Southern VA\Adult\497252	PXL_20230208_210819761.dng	1458
FieldData\Smithsonian Pictures\Southern VA\Adult\497252	PXL_20230208_210831253.dng	1459
FieldData\Smithsonian Pictures\Southern VA\Adult\497252	PXL_20230208_210837833.dng	1460
FieldData\Smithsonian Pictures\Southern VA\Adult\497254	PXL_20230208_210448671.dng	1461
FieldData\Smithsonian Pictures\Southern VA\Adult\497254	PXL_20230208_210450791.dng	1462
FieldData\Smithsonian Pictures\Southern VA\Adult\497254	PXL_20230208_210453350.dng	1463
FieldData\Smithsonian Pictures\Southern VA\Adult\497254	PXL_20230208_210508890.dng	1464
FieldData\Smithsonian Pictures\Southern VA\Adult\497254	PXL_20230208_210509591.dng	1465
FieldData\Smithsonian Pictures\Southern VA\Adult\497254	PXL_20230208_210517593.dng	1466
FieldData\Smithsonian Pictures\Southern VA\Adult\497254	PXL_20230208_210518433.dng	1467
FieldData\Smithsonian Pictures\Southern VA\Adult\497254	PXL_20230208_210525604.dng	1468
FieldData\Smithsonian Pictures\Southern VA\Adult\497254	PXL_20230208_210526380.dng	1469
FieldData\Smithsonian Pictures\Southern VA\Adult\497254	PXL_20230208_210538741.dng	1470
FieldData\Smithsonian Pictures\Southern VA\Adult\497254	PXL_20230208_210540282.dng	1471
FieldData\Smithsonian Pictures\Southern VA\Adult\497261	PXL_20230208_205629687.dng	1472
FieldData\Smithsonian Pictures\Southern VA\Adult\497261	PXL_20230208_205633990.dng	1473
FieldData\Smithsonian Pictures\Southern VA\Adult\497261	PXL_20230208_205636026.dng	1474
FieldData\Smithsonian Pictures\Southern VA\Adult\497261	PXL_20230208_205650118.dng	1475
FieldData\Smithsonian Pictures\Southern VA\Adult\497261	PXL_20230208_205650871.dng	1476
FieldData\Smithsonian Pictures\Southern VA\Adult\497261	PXL_20230208_205700026.dng	1477
FieldData\Smithsonian Pictures\Southern VA\Adult\497261	PXL_20230208_205700788.dng	1478
FieldData\Smithsonian Pictures\Southern VA\Adult\497261	PXL_20230208_205708408.dng	1479
FieldData\Smithsonian Pictures\Southern VA\Adult\497261	PXL_20230208_205709644.dng	1480
FieldData\Smithsonian Pictures\Southern VA\Adult\497261	PXL_20230208_205717296.dng	1481
FieldData\Smithsonian Pictures\Southern VA\Adult\497261	PXL_20230208_205720485.dng	1482
FieldData\Smithsonian Pictures\Southern VA\Adult\497268	PXL_20230208_205038081.dng	1483
FieldData\Smithsonian Pictures\Southern VA\Adult\497268	PXL_20230208_205040579.dng	1484
FieldData\Smithsonian Pictures\Southern VA\Adult\497268	PXL_20230208_205042451.dng	1485
FieldData\Smithsonian Pictures\Southern VA\Adult\497268	PXL_20230208_205053360.dng	1486
FieldData\Smithsonian Pictures\Southern VA\Adult\497268	PXL_20230208_205059504.dng	1487
FieldData\Smithsonian Pictures\Southern VA\Adult\497268	PXL_20230208_205100157.dng	1488
FieldData\Smithsonian Pictures\Southern VA\Adult\497268	PXL_20230208_205114753.dng	1489
FieldData\Smithsonian Pictures\Southern VA\Adult\497268	PXL_20230208_205115787.dng	1490
FieldData\Smithsonian Pictures\Southern VA\Adult\497268	PXL_20230208_205128010.dng	1491
FieldData\Smithsonian Pictures\Southern VA\Adult\497268	PXL_20230208_205128692.dng	1492
FieldData\Smithsonian Pictures\Southern VA\Adult\497268	PXL_20230208_205137725.dng	1493
FieldData\Smithsonian Pictures\Southern VA\Adult\497268	PXL_20230208_205138473.dng	1494
FieldData\Smithsonian Pictures\Southern VA\Adult\497301	PXL_20230208_201554809.dng	1495
FieldData\Smithsonian Pictures\Southern VA\Adult\497301	PXL_20230208_201559697.dng	1496
FieldData\Smithsonian Pictures\Southern VA\Adult\497301	PXL_20230208_201601844.dng	1497
FieldData\Smithsonian Pictures\Southern VA\Adult\497301	PXL_20230208_201622820.dng	1498
FieldData\Smithsonian Pictures\Southern VA\Adult\497301	PXL_20230208_201623634.dng	1499
FieldData\Smithsonian Pictures\Southern VA\Adult\497301	PXL_20230208_201635626.dng	1500
FieldData\Smithsonian Pictures\Southern VA\Adult\497301	PXL_20230208_201636552.dng	1501
FieldData\Smithsonian Pictures\Southern VA\Adult\497301	PXL_20230208_201644612.dng	1502
FieldData\Smithsonian Pictures\Southern VA\Adult\497301	PXL_20230208_201645395.dng	1503
FieldData\Smithsonian Pictures\Southern VA\Adult\497301	PXL_20230208_201652258.dng	1504
FieldData\Smithsonian Pictures\Southern VA\Adult\497301	PXL_20230208_201654708.dng	1505
FieldData\Smithsonian Pictures\Southern VA\Adult\519624	PXL_20230210_192058805.dng	1506
FieldData\Smithsonian Pictures\Southern VA\Adult\519624	PXL_20230210_192102393.dng	1507
FieldData\Smithsonian Pictures\Southern VA\Adult\519624	PXL_20230210_192105121.dng	1508
FieldData\Smithsonian Pictures\Southern VA\Adult\519624	PXL_20230210_192119527.dng	1509
FieldData\Smithsonian Pictures\Southern VA\Adult\519624	PXL_20230210_192120435.dng	1510
FieldData\Smithsonian Pictures\Southern VA\Adult\519624	PXL_20230210_192131612.dng	1511
FieldData\Smithsonian Pictures\Southern VA\Adult\519624	PXL_20230210_192132330.dng	1512
FieldData\Smithsonian Pictures\Southern VA\Adult\519624	PXL_20230210_192139248.dng	1513
FieldData\Smithsonian Pictures\Southern VA\Adult\519624	PXL_20230210_192139926.dng	1514
FieldData\Smithsonian Pictures\Southern VA\Adult\519624	PXL_20230210_192151010.dng	1515
FieldData\Smithsonian Pictures\Southern VA\Adult\519624	PXL_20230210_192151779.dng	1516
FieldData\Smithsonian Pictures\Southern VA\Hatchlings\519625	PXL_20230210_205254752.dng	1517
FieldData\Smithsonian Pictures\Southern VA\Hatchlings\519625	PXL_20230210_205257885.dng	1518
FieldData\Smithsonian Pictures\Southern VA\Hatchlings\519625	PXL_20230210_205259557.dng	1519
FieldData\Smithsonian Pictures\Southern VA\Hatchlings\519625	PXL_20230210_205321702.dng	1520
FieldData\Smithsonian Pictures\Southern VA\Hatchlings\519625	PXL_20230210_205322292.dng	1521
FieldData\Smithsonian Pictures\Southern VA\Hatchlings\519625	PXL_20230210_205333123.dng	1522
FieldData\Smithsonian Pictures\Southern VA\Hatchlings\519625	PXL_20230210_205334005.dng	1523
FieldData\Smithsonian Pictures\Southern VA\Hatchlings\519625	PXL_20230210_205345087.dng	1524
FieldData\Smithsonian Pictures\Southern VA\Hatchlings\519625	PXL_20230210_205345794.dng	1525
FieldData\Smithsonian Pictures\Southern VA\Hatchlings\519625	PXL_20230210_205359306.dng	1526
FieldData\Smithsonian Pictures\Southern VA\Hatchlings\519625	PXL_20230210_205400615.dng	1527
FieldData\Smithsonian Pictures\Southern VA\Hatchlings\519626	PXL_20230210_191726947.dng	1528
FieldData\Smithsonian Pictures\Southern VA\Hatchlings\519626	PXL_20230210_191729799.dng	1529
FieldData\Smithsonian Pictures\Southern VA\Hatchlings\519626	PXL_20230210_191731496.dng	1530
FieldData\Smithsonian Pictures\Southern VA\Hatchlings\519626	PXL_20230210_191808647.dng	1531
FieldData\Smithsonian Pictures\Southern VA\Hatchlings\519626	PXL_20230210_191810354.dng	1532
FieldData\Smithsonian Pictures\Southern VA\Hatchlings\519626	PXL_20230210_191821175.dng	1533
FieldData\Smithsonian Pictures\Southern VA\Hatchlings\519626	PXL_20230210_191824482.dng	1534
FieldData\Smithsonian Pictures\Southern VA\Hatchlings\519626	PXL_20230210_191838078.dng	1535
FieldData\Smithsonian Pictures\Southern VA\Hatchlings\519626	PXL_20230210_191839919.dng	1536
FieldData\Smithsonian Pictures\Southern VA\Hatchlings\519626	PXL_20230210_191848058.dng	1537
FieldData\Smithsonian Pictures\Southern VA\Hatchlings\519626	PXL_20230210_191848916.dng	1538
FieldData\Smithsonian Pictures\Southern VA\Hatchlings\519627	PXL_20230210_204436062.dng	1539
FieldData\Smithsonian Pictures\Southern VA\Hatchlings\519627	PXL_20230210_204439482.dng	1540
FieldData\Smithsonian Pictures\Southern VA\Hatchlings\519627	PXL_20230210_204442256.dng	1541
FieldData\Smithsonian Pictures\Southern VA\Hatchlings\519627	PXL_20230210_204458053.dng	1542
FieldData\Smithsonian Pictures\Southern VA\Hatchlings\519627	PXL_20230210_204458904.dng	1543
FieldData\Smithsonian Pictures\Southern VA\Hatchlings\519627	PXL_20230210_204506183.dng	1544
FieldData\Smithsonian Pictures\Southern VA\Hatchlings\519627	PXL_20230210_204506911.dng	1545
FieldData\Smithsonian Pictures\Southern VA\Hatchlings\519627	PXL_20230210_204521296.dng	1546
FieldData\Smithsonian Pictures\Southern VA\Hatchlings\519627	PXL_20230210_204522016.dng	1547
FieldData\Smithsonian Pictures\Southern VA\Hatchlings\519627	PXL_20230210_204529404.dng	1548
FieldData\Smithsonian Pictures\Southern VA\Hatchlings\519627	PXL_20230210_204530246.dng	1549
FieldData\Smithsonian Pictures\Southern VA\Hatchlings\519630	PXL_20230210_192657859.dng	1550
FieldData\Smithsonian Pictures\Southern VA\Hatchlings\519630	PXL_20230210_192700532.dng	1551
FieldData\Smithsonian Pictures\Southern VA\Hatchlings\519630	PXL_20230210_192703854.dng	1552
FieldData\Smithsonian Pictures\Southern VA\Hatchlings\519630	PXL_20230210_192717493.dng	1553
FieldData\Smithsonian Pictures\Southern VA\Hatchlings\519630	PXL_20230210_192718144.dng	1554
FieldData\Smithsonian Pictures\Southern VA\Hatchlings\519630	PXL_20230210_192725719.dng	1555
FieldData\Smithsonian Pictures\Southern VA\Hatchlings\519630	PXL_20230210_192726870.dng	1556
FieldData\Smithsonian Pictures\Southern VA\Hatchlings\519630	PXL_20230210_192738589.dng	1557
FieldData\Smithsonian Pictures\Southern VA\Hatchlings\519630	PXL_20230210_192739181.dng	1558
FieldData\Smithsonian Pictures\Southern VA\Hatchlings\519630	PXL_20230210_192750930.dng	1559
FieldData\Smithsonian Pictures\Southern VA\Hatchlings\519630	PXL_20230210_192752169.dng	1560
FieldData\Smithsonian Pictures\Southern VA\Hatchlings\519631	PXL_20230210_202315320.dng	1561
FieldData\Smithsonian Pictures\Southern VA\Hatchlings\519631	PXL_20230210_202317412.dng	1562
FieldData\Smithsonian Pictures\Southern VA\Hatchlings\519631	PXL_20230210_202319503.dng	1563
FieldData\Smithsonian Pictures\Southern VA\Hatchlings\519631	PXL_20230210_202334798.dng	1564
FieldData\Smithsonian Pictures\Southern VA\Hatchlings\519631	PXL_20230210_202335784.dng	1565
FieldData\Smithsonian Pictures\Southern VA\Hatchlings\519631	PXL_20230210_202343866.dng	1566
FieldData\Smithsonian Pictures\Southern VA\Hatchlings\519631	PXL_20230210_202344608.dng	1567
FieldData\Smithsonian Pictures\Southern VA\Hatchlings\519631	PXL_20230210_202359316.dng	1568
FieldData\Smithsonian Pictures\Southern VA\Hatchlings\519631	PXL_20230210_202359964.dng	1569
FieldData\Smithsonian Pictures\Southern VA\Hatchlings\519631	PXL_20230210_202410634.dng	1570
FieldData\Smithsonian Pictures\Southern VA\Hatchlings\519631	PXL_20230210_202411398.dng	1571
FieldData\Smithsonian Pictures\Southern VA\Hatchlings\519632	PXL_20230210_193958574.dng	1572
FieldData\Smithsonian Pictures\Southern VA\Hatchlings\519632	PXL_20230210_194000788.dng	1573
FieldData\Smithsonian Pictures\Southern VA\Hatchlings\519632	PXL_20230210_194002538.dng	1574
FieldData\Smithsonian Pictures\Southern VA\Hatchlings\519632	PXL_20230210_194020003.dng	1575
FieldData\Smithsonian Pictures\Southern VA\Hatchlings\519632	PXL_20230210_194020642.dng	1576
FieldData\Smithsonian Pictures\Southern VA\Hatchlings\519632	PXL_20230210_194031398.dng	1577
FieldData\Smithsonian Pictures\Southern VA\Hatchlings\519632	PXL_20230210_194032122.dng	1578
FieldData\Smithsonian Pictures\Southern VA\Hatchlings\519632	PXL_20230210_194103923.dng	1579
FieldData\Smithsonian Pictures\Southern VA\Hatchlings\519632	PXL_20230210_194104545.dng	1580
FieldData\Smithsonian Pictures\Southern VA\Hatchlings\519632	PXL_20230210_194117879.dng	1581
FieldData\Smithsonian Pictures\Southern VA\Hatchlings\519632	PXL_20230210_194119552.dng	1582
FieldData\Smithsonian Pictures\Southern VA\Hatchlings\519633	PXL_20230210_193012635.dng	1583
FieldData\Smithsonian Pictures\Southern VA\Hatchlings\519633	PXL_20230210_193015123.dng	1584
FieldData\Smithsonian Pictures\Southern VA\Hatchlings\519633	PXL_20230210_193016540.dng	1585
FieldData\Smithsonian Pictures\Southern VA\Hatchlings\519633	PXL_20230210_193028915.dng	1586
FieldData\Smithsonian Pictures\Southern VA\Hatchlings\519633	PXL_20230210_193029672.dng	1587
FieldData\Smithsonian Pictures\Southern VA\Hatchlings\519633	PXL_20230210_193040760.dng	1588
FieldData\Smithsonian Pictures\Southern VA\Hatchlings\519633	PXL_20230210_193042743.dng	1589
FieldData\Smithsonian Pictures\Southern VA\Hatchlings\519633	PXL_20230210_193048177.dng	1590
FieldData\Smithsonian Pictures\Southern VA\Hatchlings\519633	PXL_20230210_193050142.dng	1591
FieldData\Smithsonian Pictures\Southern VA\Hatchlings\519633	PXL_20230210_193106143.dng	1592
FieldData\Smithsonian Pictures\Southern VA\Hatchlings\519633	PXL_20230210_193106864.dng	1593
FieldData\Smithsonian Pictures\Southern VA\Hatchlings\519642	PXL_20230210_211938284.dng	1594
FieldData\Smithsonian Pictures\Southern VA\Hatchlings\519642	PXL_20230210_211942724.dng	1595
FieldData\Smithsonian Pictures\Southern VA\Hatchlings\519642	PXL_20230210_211945411.dng	1596
FieldData\Smithsonian Pictures\Southern VA\Hatchlings\519642	PXL_20230210_212030439.dng	1597
FieldData\Smithsonian Pictures\Southern VA\Hatchlings\519642	PXL_20230210_212031116.dng	1598
FieldData\Smithsonian Pictures\Southern VA\Hatchlings\519642	PXL_20230210_212041828.dng	1599
FieldData\Smithsonian Pictures\Southern VA\Hatchlings\519642	PXL_20230210_212042448.dng	1600
FieldData\Smithsonian Pictures\Southern VA\Hatchlings\519642	PXL_20230210_212056086.dng	1601
FieldData\Smithsonian Pictures\Southern VA\Hatchlings\519642	PXL_20230210_212056626.dng	1602
FieldData\Smithsonian Pictures\Southern VA\Hatchlings\519642	PXL_20230210_212105455.dng	1603
FieldData\Smithsonian Pictures\Southern VA\Hatchlings\519642	PXL_20230210_212106338.dng	1604
FieldData\Smithsonian Pictures\Southern VA\Hatchlings\519643	PXL_20230210_205705311.dng	1605
FieldData\Smithsonian Pictures\Southern VA\Hatchlings\519643	PXL_20230210_205707579.dng	1606
FieldData\Smithsonian Pictures\Southern VA\Hatchlings\519643	PXL_20230210_205709534.dng	1607
FieldData\Smithsonian Pictures\Southern VA\Hatchlings\519643	PXL_20230210_205730379.dng	1608
FieldData\Smithsonian Pictures\Southern VA\Hatchlings\519643	PXL_20230210_205731044.dng	1609
FieldData\Smithsonian Pictures\Southern VA\Hatchlings\519643	PXL_20230210_205739685.dng	1610
FieldData\Smithsonian Pictures\Southern VA\Hatchlings\519643	PXL_20230210_205740615.dng	1611
FieldData\Smithsonian Pictures\Southern VA\Hatchlings\519643	PXL_20230210_205750829.dng	1612
FieldData\Smithsonian Pictures\Southern VA\Hatchlings\519643	PXL_20230210_205751489.dng	1613
FieldData\Smithsonian Pictures\Southern VA\Hatchlings\519643	PXL_20230210_205806418.dng	1614
FieldData\Smithsonian Pictures\Southern VA\Hatchlings\519643	PXL_20230210_205807354.dng	1615
FieldData\Smithsonian Pictures\Southern VA\Hatchlings\519644	PXL_20230210_200200959.dng	1616
FieldData\Smithsonian Pictures\Southern VA\Hatchlings\519644	PXL_20230210_200202488.dng	1617
FieldData\Smithsonian Pictures\Southern VA\Hatchlings\519644	PXL_20230210_200203736.dng	1618
FieldData\Smithsonian Pictures\Southern VA\Hatchlings\519644	PXL_20230210_200222187.dng	1619
FieldData\Smithsonian Pictures\Southern VA\Hatchlings\519644	PXL_20230210_200222821.dng	1620
FieldData\Smithsonian Pictures\Southern VA\Hatchlings\519644	PXL_20230210_200231516.dng	1621
FieldData\Smithsonian Pictures\Southern VA\Hatchlings\519644	PXL_20230210_200232117.dng	1622
FieldData\Smithsonian Pictures\Southern VA\Hatchlings\519644	PXL_20230210_200244694.dng	1623
FieldData\Smithsonian Pictures\Southern VA\Hatchlings\519644	PXL_20230210_200245396.dng	1624
FieldData\Smithsonian Pictures\Southern VA\Hatchlings\519644	PXL_20230210_200256879.dng	1625
FieldData\Smithsonian Pictures\Southern VA\Hatchlings\519644	PXL_20230210_200257493.dng	1626
FieldData\Smithsonian Pictures\Southern VA\Hatchlings\519646	PXL_20230210_211445356.dng	1627
FieldData\Smithsonian Pictures\Southern VA\Hatchlings\519646	PXL_20230210_211447311.dng	1628
FieldData\Smithsonian Pictures\Southern VA\Hatchlings\519646	PXL_20230210_211449317.dng	1629
FieldData\Smithsonian Pictures\Southern VA\Hatchlings\519646	PXL_20230210_211503107.dng	1630
FieldData\Smithsonian Pictures\Southern VA\Hatchlings\519646	PXL_20230210_211503789.dng	1631
FieldData\Smithsonian Pictures\Southern VA\Hatchlings\519646	PXL_20230210_211514344.dng	1632
FieldData\Smithsonian Pictures\Southern VA\Hatchlings\519646	PXL_20230210_211514990.dng	1633
FieldData\Smithsonian Pictures\Southern VA\Hatchlings\519646	PXL_20230210_211524156.dng	1634
FieldData\Smithsonian Pictures\Southern VA\Hatchlings\519646	PXL_20230210_211524746.dng	1635
FieldData\Smithsonian Pictures\Southern VA\Hatchlings\519646	PXL_20230210_211537327.dng	1636
FieldData\Smithsonian Pictures\Southern VA\Hatchlings\519646	PXL_20230210_211538382.dng	1637
FieldData\Smithsonian Pictures\Southern VA\Hatchlings\519647	PXL_20230210_203251001.dng	1638
FieldData\Smithsonian Pictures\Southern VA\Hatchlings\519647	PXL_20230210_203253750.dng	1639
FieldData\Smithsonian Pictures\Southern VA\Hatchlings\519647	PXL_20230210_203255624.dng	1640
FieldData\Smithsonian Pictures\Southern VA\Hatchlings\519647	PXL_20230210_203312228.dng	1641
FieldData\Smithsonian Pictures\Southern VA\Hatchlings\519647	PXL_20230210_203313818.dng	1642
FieldData\Smithsonian Pictures\Southern VA\Hatchlings\519647	PXL_20230210_203327156.dng	1643
FieldData\Smithsonian Pictures\Southern VA\Hatchlings\519647	PXL_20230210_203327835.dng	1644
FieldData\Smithsonian Pictures\Southern VA\Hatchlings\519647	PXL_20230210_203340391.dng	1645
FieldData\Smithsonian Pictures\Southern VA\Hatchlings\519647	PXL_20230210_203341261.dng	1646
FieldData\Smithsonian Pictures\Southern VA\Hatchlings\519647	PXL_20230210_203353416.dng	1647
FieldData\Smithsonian Pictures\Southern VA\Hatchlings\519647	PXL_20230210_203354789.dng	1648
FieldData\Smithsonian Pictures\Southern VA\Hatchlings\519649	PXL_20230210_195312678.dng	1649
FieldData\Smithsonian Pictures\Southern VA\Hatchlings\519649	PXL_20230210_195314119.dng	1650
FieldData\Smithsonian Pictures\Southern VA\Hatchlings\519649	PXL_20230210_195317356.dng	1651
FieldData\Smithsonian Pictures\Southern VA\Hatchlings\519649	PXL_20230210_195341567.dng	1652
FieldData\Smithsonian Pictures\Southern VA\Hatchlings\519649	PXL_20230210_195342246.dng	1653
FieldData\Smithsonian Pictures\Southern VA\Hatchlings\519649	PXL_20230210_195354943.dng	1654
FieldData\Smithsonian Pictures\Southern VA\Hatchlings\519649	PXL_20230210_195355578.dng	1655
FieldData\Smithsonian Pictures\Southern VA\Hatchlings\519649	PXL_20230210_195404826.dng	1656
FieldData\Smithsonian Pictures\Southern VA\Hatchlings\519649	PXL_20230210_195407123.dng	1657
FieldData\Smithsonian Pictures\Southern VA\Hatchlings\519649	PXL_20230210_195422587.dng	1658
FieldData\Smithsonian Pictures\Southern VA\Hatchlings\519649	PXL_20230210_195424920.dng	1659
FieldData\Smithsonian Pictures\Southern VA\Hatchlings\519649	PXL_20230210_195425537.dng	1660
FieldData\Smithsonian Pictures\Southern VA\Hatchlings\519652	PXL_20230210_192359673.dng	1661
FieldData\Smithsonian Pictures\Southern VA\Hatchlings\519652	PXL_20230210_192402129.dng	1662
FieldData\Smithsonian Pictures\Southern VA\Hatchlings\519652	PXL_20230210_192403792.dng	1663
FieldData\Smithsonian Pictures\Southern VA\Hatchlings\519652	PXL_20230210_192423736.dng	1664
FieldData\Smithsonian Pictures\Southern VA\Hatchlings\519652	PXL_20230210_192426045.dng	1665
FieldData\Smithsonian Pictures\Southern VA\Hatchlings\519652	PXL_20230210_192432322.dng	1666
FieldData\Smithsonian Pictures\Southern VA\Hatchlings\519652	PXL_20230210_192433068.dng	1667
FieldData\Smithsonian Pictures\Southern VA\Hatchlings\519652	PXL_20230210_192441316.dng	1668
FieldData\Smithsonian Pictures\Southern VA\Hatchlings\519652	PXL_20230210_192441987.dng	1669
FieldData\Smithsonian Pictures\Southern VA\Hatchlings\519652	PXL_20230210_192458805.dng	1670
FieldData\Smithsonian Pictures\Southern VA\Hatchlings\519652	PXL_20230210_192459617.dng	1671
FieldData\Smithsonian Pictures\Southern VA\Hatchlings\519653	PXL_20230210_195703767.dng	1672
FieldData\Smithsonian Pictures\Southern VA\Hatchlings\519653	PXL_20230210_195705340.dng	1673
FieldData\Smithsonian Pictures\Southern VA\Hatchlings\519653	PXL_20230210_195706390.dng	1674
FieldData\Smithsonian Pictures\Southern VA\Hatchlings\519653	PXL_20230210_195721065.dng	1675
FieldData\Smithsonian Pictures\Southern VA\Hatchlings\519653	PXL_20230210_195721637.dng	1676
FieldData\Smithsonian Pictures\Southern VA\Hatchlings\519653	PXL_20230210_195733223.dng	1677
FieldData\Smithsonian Pictures\Southern VA\Hatchlings\519653	PXL_20230210_195734666.dng	1678
FieldData\Smithsonian Pictures\Southern VA\Hatchlings\519653	PXL_20230210_195742972.dng	1679
FieldData\Smithsonian Pictures\Southern VA\Hatchlings\519653	PXL_20230210_195743743.dng	1680
FieldData\Smithsonian Pictures\Southern VA\Hatchlings\519653	PXL_20230210_195754568.dng	1681
FieldData\Smithsonian Pictures\Southern VA\Hatchlings\519653	PXL_20230210_195755283.dng	1682
FieldData\Smithsonian Pictures\Southern VA\Hatchlings\519654	PXL_20230210_204846398.dng	1683
FieldData\Smithsonian Pictures\Southern VA\Hatchlings\519654	PXL_20230210_204848678.dng	1684
FieldData\Smithsonian Pictures\Southern VA\Hatchlings\519654	PXL_20230210_204849982.dng	1685
FieldData\Smithsonian Pictures\Southern VA\Hatchlings\519654	PXL_20230210_204905856.dng	1686
FieldData\Smithsonian Pictures\Southern VA\Hatchlings\519654	PXL_20230210_204906974.dng	1687
FieldData\Smithsonian Pictures\Southern VA\Hatchlings\519654	PXL_20230210_204917024.dng	1688
FieldData\Smithsonian Pictures\Southern VA\Hatchlings\519654	PXL_20230210_204917803.dng	1689
FieldData\Smithsonian Pictures\Southern VA\Hatchlings\519654	PXL_20230210_204932401.dng	1690
FieldData\Smithsonian Pictures\Southern VA\Hatchlings\519654	PXL_20230210_204933159.dng	1691
FieldData\Smithsonian Pictures\Southern VA\Hatchlings\519654	PXL_20230210_204946416.dng	1692
FieldData\Smithsonian Pictures\Southern VA\Hatchlings\519654	PXL_20230210_204947558.dng	1693
FieldData\Smithsonian Pictures\Southern VA\Hatchlings\519655	PXL_20230210_200437089.dng	1694
FieldData\Smithsonian Pictures\Southern VA\Hatchlings\519655	PXL_20230210_200439730.dng	1695
FieldData\Smithsonian Pictures\Southern VA\Hatchlings\519655	PXL_20230210_200441607.dng	1696
FieldData\Smithsonian Pictures\Southern VA\Hatchlings\519655	PXL_20230210_200455348.dng	1697
FieldData\Smithsonian Pictures\Southern VA\Hatchlings\519655	PXL_20230210_200456265.dng	1698
FieldData\Smithsonian Pictures\Southern VA\Hatchlings\519655	PXL_20230210_200503910.dng	1699
FieldData\Smithsonian Pictures\Southern VA\Hatchlings\519655	PXL_20230210_200504589.dng	1700
FieldData\Smithsonian Pictures\Southern VA\Hatchlings\519655	PXL_20230210_200517554.dng	1701
FieldData\Smithsonian Pictures\Southern VA\Hatchlings\519655	PXL_20230210_200518281.dng	1702
FieldData\Smithsonian Pictures\Southern VA\Hatchlings\519655	PXL_20230210_200529232.dng	1703
FieldData\Smithsonian Pictures\Southern VA\Hatchlings\519655	PXL_20230210_200530052.dng	1704
FieldData\Smithsonian Pictures\Southern VA\Hatchlings\519656	PXL_20230210_193653306.dng	1705
FieldData\Smithsonian Pictures\Southern VA\Hatchlings\519656	PXL_20230210_193655354.dng	1706
FieldData\Smithsonian Pictures\Southern VA\Hatchlings\519656	PXL_20230210_193658146.dng	1707
FieldData\Smithsonian Pictures\Southern VA\Hatchlings\519656	PXL_20230210_193718185.dng	1708
FieldData\Smithsonian Pictures\Southern VA\Hatchlings\519656	PXL_20230210_193718985.dng	1709
FieldData\Smithsonian Pictures\Southern VA\Hatchlings\519656	PXL_20230210_193730775.dng	1710
FieldData\Smithsonian Pictures\Southern VA\Hatchlings\519656	PXL_20230210_193732619.dng	1711
FieldData\Smithsonian Pictures\Southern VA\Hatchlings\519656	PXL_20230210_193751951.dng	1712
FieldData\Smithsonian Pictures\Southern VA\Hatchlings\519656	PXL_20230210_193752913.dng	1713
FieldData\Smithsonian Pictures\Southern VA\Hatchlings\519656	PXL_20230210_193801698.dng	1714
FieldData\Smithsonian Pictures\Southern VA\Hatchlings\519656	PXL_20230210_193802495.dng	1715
FieldData\Smithsonian Pictures\Southern VA\Hatchlings\519661	PXL_20230210_202708821.dng	1716
FieldData\Smithsonian Pictures\Southern VA\Hatchlings\519661	PXL_20230210_202713550.dng	1717
FieldData\Smithsonian Pictures\Southern VA\Hatchlings\519661	PXL_20230210_202714753.dng	1718
FieldData\Smithsonian Pictures\Southern VA\Hatchlings\519661	PXL_20230210_202729369.dng	1719
FieldData\Smithsonian Pictures\Southern VA\Hatchlings\519661	PXL_20230210_202730237.dng	1720
FieldData\Smithsonian Pictures\Southern VA\Hatchlings\519661	PXL_20230210_202739284.dng	1721
FieldData\Smithsonian Pictures\Southern VA\Hatchlings\519661	PXL_20230210_202740506.dng	1722
FieldData\Smithsonian Pictures\Southern VA\Hatchlings\519661	PXL_20230210_202751248.dng	1723
FieldData\Smithsonian Pictures\Southern VA\Hatchlings\519661	PXL_20230210_202751988.dng	1724
FieldData\Smithsonian Pictures\Southern VA\Hatchlings\519661	PXL_20230210_202802530.dng	1725
FieldData\Smithsonian Pictures\Southern VA\Hatchlings\519661	PXL_20230210_202804116.dng	1726
FieldData\Smithsonian Pictures\Southern VA\Hatchlings\519662	PXL_20230210_203005989.dng	1727
FieldData\Smithsonian Pictures\Southern VA\Hatchlings\519662	PXL_20230210_203006869.dng	1728
FieldData\Smithsonian Pictures\Southern VA\Hatchlings\519662	PXL_20230210_203009627.dng	1729
FieldData\Smithsonian Pictures\Southern VA\Hatchlings\519662	PXL_20230210_203025358.dng	1730
FieldData\Smithsonian Pictures\Southern VA\Hatchlings\519662	PXL_20230210_203026090.dng	1731
FieldData\Smithsonian Pictures\Southern VA\Hatchlings\519662	PXL_20230210_203036503.dng	1732
FieldData\Smithsonian Pictures\Southern VA\Hatchlings\519662	PXL_20230210_203037118.dng	1733
FieldData\Smithsonian Pictures\Southern VA\Hatchlings\519662	PXL_20230210_203047748.dng	1734
FieldData\Smithsonian Pictures\Southern VA\Hatchlings\519662	PXL_20230210_203048383.dng	1735
FieldData\Smithsonian Pictures\Southern VA\Hatchlings\519662	PXL_20230210_203100412.dng	1736
FieldData\Smithsonian Pictures\Southern VA\Hatchlings\519662	PXL_20230210_203101061.dng	1737
FieldData\Smithsonian Pictures\Southern VA\Hatchlings\519663	PXL_20230210_191523204.dng	1738
FieldData\Smithsonian Pictures\Southern VA\Hatchlings\519663	PXL_20230210_191523951.dng	1739
FieldData\Smithsonian Pictures\Southern VA\Hatchlings\519663	PXL_20230210_191526300.dng	1740
FieldData\Smithsonian Pictures\Southern VA\Hatchlings\519663	PXL_20230210_191538519.dng	1741
FieldData\Smithsonian Pictures\Southern VA\Hatchlings\519663	PXL_20230210_191539122.dng	1742
FieldData\Smithsonian Pictures\Southern VA\Hatchlings\519663	PXL_20230210_191546955.dng	1743
FieldData\Smithsonian Pictures\Southern VA\Hatchlings\519663	PXL_20230210_191547818.dng	1744
FieldData\Smithsonian Pictures\Southern VA\Hatchlings\519663	PXL_20230210_191558627.dng	1745
FieldData\Smithsonian Pictures\Southern VA\Hatchlings\519663	PXL_20230210_191559262.dng	1746
FieldData\Smithsonian Pictures\Southern VA\Hatchlings\519663	PXL_20230210_191611171.dng	1747
FieldData\Smithsonian Pictures\Southern VA\Hatchlings\519663	PXL_20230210_191611808.dng	1748
FieldData\Smithsonian Pictures\Southern VA\Hatchlings\519664	PXL_20230210_194751502.dng	1749
FieldData\Smithsonian Pictures\Southern VA\Hatchlings\519664	PXL_20230210_194752617.dng	1750
FieldData\Smithsonian Pictures\Southern VA\Hatchlings\519664	PXL_20230210_194753504.dng	1751
FieldData\Smithsonian Pictures\Southern VA\Hatchlings\519664	PXL_20230210_194819583.dng	1752
FieldData\Smithsonian Pictures\Southern VA\Hatchlings\519664	PXL_20230210_194822133.dng	1753
FieldData\Smithsonian Pictures\Southern VA\Hatchlings\519664	PXL_20230210_194833940.dng	1754
FieldData\Smithsonian Pictures\Southern VA\Hatchlings\519664	PXL_20230210_194834644.dng	1755
FieldData\Smithsonian Pictures\Southern VA\Hatchlings\519664	PXL_20230210_194857154.dng	1756
FieldData\Smithsonian Pictures\Southern VA\Hatchlings\519664	PXL_20230210_194857811.dng	1757
FieldData\Smithsonian Pictures\Southern VA\Hatchlings\519665	PXL_20230210_210647249.dng	1758
FieldData\Smithsonian Pictures\Southern VA\Hatchlings\519665	PXL_20230210_210650755.dng	1759
FieldData\Smithsonian Pictures\Southern VA\Hatchlings\519665	PXL_20230210_210652965.dng	1760
FieldData\Smithsonian Pictures\Southern VA\Hatchlings\519665	PXL_20230210_210714523.dng	1761
FieldData\Smithsonian Pictures\Southern VA\Hatchlings\519665	PXL_20230210_210715211.dng	1762
FieldData\Smithsonian Pictures\Southern VA\Hatchlings\519665	PXL_20230210_210733097.dng	1763
FieldData\Smithsonian Pictures\Southern VA\Hatchlings\519665	PXL_20230210_210734290.dng	1764
FieldData\Smithsonian Pictures\Southern VA\Hatchlings\519665	PXL_20230210_210746439.dng	1765
FieldData\Smithsonian Pictures\Southern VA\Hatchlings\519665	PXL_20230210_210747093.dng	1766
FieldData\Smithsonian Pictures\Southern VA\Hatchlings\519665	PXL_20230210_210758291.dng	1767
FieldData\Smithsonian Pictures\Southern VA\Hatchlings\519665	PXL_20230210_210759154.dng	1768
FieldData\Smithsonian Pictures\Southern VA\Hatchlings\519666	PXL_20230210_201116894.dng	1769
FieldData\Smithsonian Pictures\Southern VA\Hatchlings\519666	PXL_20230210_201118922.dng	1770
FieldData\Smithsonian Pictures\Southern VA\Hatchlings\519666	PXL_20230210_201120697.dng	1771
FieldData\Smithsonian Pictures\Southern VA\Hatchlings\519666	PXL_20230210_201136715.dng	1772
FieldData\Smithsonian Pictures\Southern VA\Hatchlings\519666	PXL_20230210_201137371.dng	1773
FieldData\Smithsonian Pictures\Southern VA\Hatchlings\519666	PXL_20230210_201148423.dng	1774
FieldData\Smithsonian Pictures\Southern VA\Hatchlings\519666	PXL_20230210_201148978.dng	1775
FieldData\Smithsonian Pictures\Southern VA\Hatchlings\519666	PXL_20230210_201203171.dng	1776
FieldData\Smithsonian Pictures\Southern VA\Hatchlings\519666	PXL_20230210_201203808.dng	1777
FieldData\Smithsonian Pictures\Southern VA\Hatchlings\519666	PXL_20230210_201217326.dng	1778
FieldData\Smithsonian Pictures\Southern VA\Hatchlings\519666	PXL_20230210_201218741.dng	1779
FieldData\Smithsonian Pictures\Southern VA\Hatchlings\519666	PXL_20230210_201219500.dng	1780
FieldData\Smithsonian Pictures\Southern VA\Juvenile\497299	PXL_20230208_202317920.dng	1781
FieldData\Smithsonian Pictures\Southern VA\Juvenile\497299	PXL_20230208_202320747.dng	1782
FieldData\Smithsonian Pictures\Southern VA\Juvenile\497299	PXL_20230208_202322847.dng	1783
FieldData\Smithsonian Pictures\Southern VA\Juvenile\497299	PXL_20230208_202352483.dng	1784
FieldData\Smithsonian Pictures\Southern VA\Juvenile\497299	PXL_20230208_202353304.dng	1785
FieldData\Smithsonian Pictures\Southern VA\Juvenile\497299	PXL_20230208_202359909.dng	1786
FieldData\Smithsonian Pictures\Southern VA\Juvenile\497299	PXL_20230208_202400721.dng	1787
FieldData\Smithsonian Pictures\Southern VA\Juvenile\497299	PXL_20230208_202409493.dng	1788
FieldData\Smithsonian Pictures\Southern VA\Juvenile\497299	PXL_20230208_202411413.dng	1789
FieldData\Smithsonian Pictures\Southern VA\Juvenile\497299	PXL_20230208_202420377.dng	1790
FieldData\Smithsonian Pictures\Southern VA\Juvenile\497299	PXL_20230208_202426861.dng	1791
FieldData\Smithsonian Pictures\Southern VA\Juvenile\497300	PXL_20230208_201942855.dng	1792
FieldData\Smithsonian Pictures\Southern VA\Juvenile\497300	PXL_20230208_201947236.dng	1793
FieldData\Smithsonian Pictures\Southern VA\Juvenile\497300	PXL_20230208_201949321.dng	1794
FieldData\Smithsonian Pictures\Southern VA\Juvenile\497300	PXL_20230208_202005992.dng	1795
FieldData\Smithsonian Pictures\Southern VA\Juvenile\497300	PXL_20230208_202006776.dng	1796
FieldData\Smithsonian Pictures\Southern VA\Juvenile\497300	PXL_20230208_202014300.dng	1797
FieldData\Smithsonian Pictures\Southern VA\Juvenile\497300	PXL_20230208_202015278.dng	1798
FieldData\Smithsonian Pictures\Southern VA\Juvenile\497300	PXL_20230208_202028512.dng	1799
FieldData\Smithsonian Pictures\Southern VA\Juvenile\497300	PXL_20230208_202029332.dng	1800
FieldData\Smithsonian Pictures\Southern VA\Juvenile\497300	PXL_20230208_202047277.dng	1801
FieldData\Smithsonian Pictures\Southern VA\Juvenile\497300	PXL_20230208_202048426.dng	1802

## Sheet: dng
FieldData\Clifton Pictures\Individuals\6-24_71	1	PXL_20220624_142250101.dng	1	PXL_20220624_142250101	dng	1	1	1
FieldData\Clifton Pictures\Individuals\6-24_71	2	PXL_20220624_142628779.dng	2	PXL_20220624_142628779	dng	2	2	1
FieldData\Clifton Pictures\Individuals\6-24_71	3	PXL_20220624_142834869.dng	3	PXL_20220624_142834869	dng	3	3	1
FieldData\Clifton Pictures\Individuals\6-24_71	4	PXL_20220624_143112543.dng	4	PXL_20220624_143112543	dng	4	4	1
FieldData\Clifton Pictures\Individuals\6-24_71	5	PXL_20220624_143236132.dng	5	PXL_20220624_143236132	dng	5	5	1
FieldData\Clifton Pictures\Individuals\6-29_84	1	PXL_20220629_140613729.dng	6	PXL_20220629_140613729	dng	1	1	1
FieldData\Clifton Pictures\Individuals\6-29_84	2	PXL_20220629_140621196.dng	7	PXL_20220629_140621196	dng	2	2	1
FieldData\Clifton Pictures\Individuals\6-29_84	3	PXL_20220629_140756288.dng	8	PXL_20220629_140756288	dng	3	3	1
FieldData\Clifton Pictures\Individuals\6-29_84	4	PXL_20220629_140758117.dng	9	PXL_20220629_140758117	dng	4	4	1
FieldData\Clifton Pictures\Individuals\6-29_84	5	PXL_20220629_141515164.dng	10	PXL_20220629_141515164	dng	5	5	1
FieldData\Clifton Pictures\Individuals\6-29_84	6	PXL_20220629_141518242.dng	11	PXL_20220629_141518242	dng	6	6	1
FieldData\Clifton Pictures\Individuals\6-29_84	7	PXL_20220629_141536005.dng	12	PXL_20220629_141536005	dng	7	7	1
FieldData\Clifton Pictures\Individuals\6-29_84	8	PXL_20220629_141539780.dng	13	PXL_20220629_141539780	dng	8	8	1
FieldData\Clifton Pictures\Individuals\6-29_84	9	PXL_20220629_141547084.dng	14	PXL_20220629_141547084	dng	9	9	1
FieldData\Clifton Pictures\Individuals\6-29_84	10	PXL_20220629_141548643.dng	15	PXL_20220629_141548643	dng	10	10	1
FieldData\Clifton Pictures\Individuals\6-29_84	11	PXL_20220629_141600778.dng	16	PXL_20220629_141600778	dng	11	11	1
FieldData\Clifton Pictures\Individuals\6-29_84	12	PXL_20220629_141611976.dng	17	PXL_20220629_141611976	dng	12	12	1
FieldData\Clifton Pictures\Individuals\6-29_84	13	PXL_20220630_173014521.dng	18	PXL_20220630_173014521	dng	13	13	1
FieldData\Clifton Pictures\Individuals\6-30_93	1	PXL_20220630_172716587.dng	19	PXL_20220630_172716587	dng	1	1	1
FieldData\Clifton Pictures\Individuals\6-30_93	2	PXL_20220630_172719850.dng	20	PXL_20220630_172719850	dng	2	2	1
FieldData\Clifton Pictures\Individuals\6-30_93	3	PXL_20220630_172915161.dng	21	PXL_20220630_172915161	dng	3	3	1
FieldData\Clifton Pictures\Individuals\6-30_93	4	PXL_20220630_172927377.dng	22	PXL_20220630_172927377	dng	4	4	1
FieldData\Clifton Pictures\Individuals\6-30_93	5	PXL_20220630_172936034.dng	23	PXL_20220630_172936034	dng	5	5	1
FieldData\Clifton Pictures\Individuals\6-30_93	6	PXL_20220630_172937307.dng	24	PXL_20220630_172937307	dng	6	6	1
FieldData\Clifton Pictures\Individuals\6-30_93	7	PXL_20220630_172952509.dng	25	PXL_20220630_172952509	dng	7	7	1
FieldData\Clifton Pictures\Individuals\6-30_93	8	PXL_20220630_172954964.dng	26	PXL_20220630_172954964	dng	8	8	1
FieldData\Clifton Pictures\Individuals\6-30_93	9	PXL_20220630_173012534.dng	27	PXL_20220630_173012534	dng	9	9	1
FieldData\Clifton Pictures\Individuals\6-30_93	10	PXL_20220630_173014521.dng	28	PXL_20220630_173014521	dng	10	10	1
FieldData\Clifton Pictures\Individuals\7-22_107	1	PXL_20220722_151704337.dng	29	PXL_20220722_151704337	dng	1	1	1
FieldData\Clifton Pictures\Individuals\7-22_107	2	PXL_20220722_151705978.dng	30	PXL_20220722_151705978	dng	2	2	1
FieldData\Clifton Pictures\Individuals\7-22_107	3	PXL_20220722_151810753.dng	31	PXL_20220722_151810753	dng	3	3	1
FieldData\Clifton Pictures\Individuals\7-22_107	4	PXL_20220722_151813979.dng	32	PXL_20220722_151813979	dng	4	4	1
FieldData\Clifton Pictures\Individuals\7-22_107	5	PXL_20220722_151833373.dng	33	PXL_20220722_151833373	dng	5	5	1
FieldData\Clifton Pictures\Individuals\7-22_107	6	PXL_20220722_151834716.dng	34	PXL_20220722_151834716	dng	6	6	1
FieldData\Clifton Pictures\Individuals\7-22_107	7	PXL_20220722_151848604.dng	35	PXL_20220722_151848604	dng	7	7	1
FieldData\Clifton Pictures\Individuals\7-22_107	8	PXL_20220722_151849774.dng	36	PXL_20220722_151849774	dng	8	8	1
FieldData\Clifton Pictures\Individuals\7-22_107	9	PXL_20220722_151912760.dng	37	PXL_20220722_151912760	dng	9	9	1
FieldData\Clifton Pictures\Individuals\7-22_107	10	PXL_20220722_151914140.dng	38	PXL_20220722_151914140	dng	10	10	1
FieldData\Clifton Pictures\Individuals\7-22_107	11	PXL_20220722_152044452.dng	39	PXL_20220722_152044452	dng	11	11	1
FieldData\Clifton Pictures\Individuals\7-22_107	12	PXL_20220722_152053708.dng	40	PXL_20220722_152053708	dng	12	12	1
FieldData\Clifton Pictures\Individuals\7-30_108	1	PXL_20220730_133021401.dng	41	PXL_20220730_133021401	dng	1	1	1
FieldData\Clifton Pictures\Individuals\7-30_108	2	PXL_20220730_133023611.dng	42	PXL_20220730_133023611	dng	2	2	1
FieldData\Clifton Pictures\Individuals\7-30_108	3	PXL_20220730_133127010.dng	43	PXL_20220730_133127010	dng	3	3	1
FieldData\Clifton Pictures\Individuals\7-30_108	4	PXL_20220730_133130794.dng	44	PXL_20220730_133130794	dng	4	4	1
FieldData\Clifton Pictures\Individuals\7-30_108	5	PXL_20220730_133158416.dng	45	PXL_20220730_133158416	dng	5	5	1
FieldData\Clifton Pictures\Individuals\7-30_108	6	PXL_20220730_133206260.dng	46	PXL_20220730_133206260	dng	6	6	1
FieldData\Clifton Pictures\Individuals\7-30_108	7	PXL_20220730_133224400.dng	47	PXL_20220730_133224400	dng	7	7	1
FieldData\Clifton Pictures\Individuals\7-30_108	8	PXL_20220730_133225754.dng	48	PXL_20220730_133225754	dng	8	8	1
FieldData\Clifton Pictures\Individuals\7-30_108	9	PXL_20220730_133246066.dng	49	PXL_20220730_133246066	dng	9	9	1
FieldData\Clifton Pictures\Individuals\7-30_108	10	PXL_20220730_133251077.dng	50	PXL_20220730_133251077	dng	10	10	1
FieldData\Clifton Pictures\Individuals\7-5_57	1	PXL_20220705_141610852.dng	51	PXL_20220705_141610852	dng	1	1	1
FieldData\Clifton Pictures\Individuals\7-5_57	2	PXL_20220705_141614791.dng	52	PXL_20220705_141614791	dng	2	2	1
FieldData\Clifton Pictures\Individuals\7-5_57	3	PXL_20220705_141656555.dng	53	PXL_20220705_141656555	dng	3	3	1
FieldData\Clifton Pictures\Individuals\7-5_57	4	PXL_20220705_141700573.dng	54	PXL_20220705_141700573	dng	4	4	1
FieldData\Clifton Pictures\Individuals\7-5_57	5	PXL_20220705_141707378.dng	55	PXL_20220705_141707378	dng	5	5	1
FieldData\Clifton Pictures\Individuals\7-5_57	6	PXL_20220705_141709095.dng	56	PXL_20220705_141709095	dng	6	6	1
FieldData\Clifton Pictures\Individuals\7-5_57	7	PXL_20220705_141717409.dng	57	PXL_20220705_141717409	dng	7	7	1
FieldData\Clifton Pictures\Individuals\7-5_57	8	PXL_20220705_141718582.dng	58	PXL_20220705_141718582	dng	8	8	1
FieldData\Clifton Pictures\Individuals\7-5_57	9	PXL_20220705_141729657.dng	59	PXL_20220705_141729657	dng	9	9	1
FieldData\Clifton Pictures\Individuals\7-5_57	10	PXL_20220705_141732023.dng	60	PXL_20220705_141732023	dng	10	10	1
FieldData\Clifton Pictures\Individuals\7-5_91	1	PXL_20220705_132452585.dng	61	PXL_20220705_132452585	dng	1	1	1
FieldData\Clifton Pictures\Individuals\7-5_91	2	PXL_20220705_132457023.dng	62	PXL_20220705_132457023	dng	2	2	1
FieldData\Clifton Pictures\Individuals\7-5_91	3	PXL_20220705_132746534.dng	63	PXL_20220705_132746534	dng	3	3	1
FieldData\Clifton Pictures\Individuals\7-5_91	4	PXL_20220705_132750397.dng	64	PXL_20220705_132750397	dng	4	4	1
FieldData\Clifton Pictures\Individuals\7-5_91	5	PXL_20220705_132759984.dng	65	PXL_20220705_132759984	dng	5	5	1
FieldData\Clifton Pictures\Individuals\7-5_91	6	PXL_20220705_132801136.dng	66	PXL_20220705_132801136	dng	6	6	1
FieldData\Clifton Pictures\Individuals\7-5_91	7	PXL_20220705_132812988.dng	67	PXL_20220705_132812988	dng	7	7	1
FieldData\Clifton Pictures\Individuals\7-5_91	8	PXL_20220705_132814102.dng	68	PXL_20220705_132814102	dng	8	8	1
FieldData\Clifton Pictures\Individuals\7-5_91	9	PXL_20220705_132829108.dng	69	PXL_20220705_132829108	dng	9	9	1
FieldData\Clifton Pictures\Individuals\7-5_91	10	PXL_20220705_132831205.dng	70	PXL_20220705_132831205	dng	10	10	1
FieldData\Clifton Pictures\Individuals\7-5_94	1	PXL_20220705_161049910.dng	71	PXL_20220705_161049910	dng	1	1	1
FieldData\Clifton Pictures\Individuals\7-5_94	2	PXL_20220705_161050891.dng	72	PXL_20220705_161050891	dng	2	2	1
FieldData\Clifton Pictures\Individuals\7-5_94	3	PXL_20220705_161144184.dng	73	PXL_20220705_161144184	dng	3	3	1
FieldData\Clifton Pictures\Individuals\7-5_94	4	PXL_20220705_161155546.dng	74	PXL_20220705_161155546	dng	4	4	1
FieldData\Clifton Pictures\Individuals\7-5_94	5	PXL_20220705_161211122.dng	75	PXL_20220705_161211122	dng	5	5	1
FieldData\Clifton Pictures\Individuals\7-5_94	6	PXL_20220705_161213166.dng	76	PXL_20220705_161213166	dng	6	6	1
FieldData\Clifton Pictures\Individuals\7-5_94	7	PXL_20220705_161232944.dng	77	PXL_20220705_161232944	dng	7	7	1
FieldData\Clifton Pictures\Individuals\7-5_94	8	PXL_20220705_161234920.dng	78	PXL_20220705_161234920	dng	8	8	1
FieldData\Clifton Pictures\Individuals\7-5_94	9	PXL_20220705_161244949.dng	79	PXL_20220705_161244949	dng	9	9	1
FieldData\Clifton Pictures\Individuals\7-5_94	10	PXL_20220705_161252650.dng	80	PXL_20220705_161252650	dng	10	10	1
FieldData\Mason Neck Pictures\Individuals\7-11_1	1	PXL_20220711_124829532.dng	83	PXL_20220711_124829532	dng	1	1	1
FieldData\Mason Neck Pictures\Individuals\7-11_1	2	PXL_20220711_124831077.dng	84	PXL_20220711_124831077	dng	2	2	1
FieldData\Mason Neck Pictures\Individuals\7-11_1	3	PXL_20220711_125605964.dng	85	PXL_20220711_125605964	dng	3	3	1
FieldData\Mason Neck Pictures\Individuals\7-11_1	4	PXL_20220711_125608870.dng	86	PXL_20220711_125608870	dng	4	4	1
FieldData\Mason Neck Pictures\Individuals\7-11_1	5	PXL_20220711_125624652.dng	87	PXL_20220711_125624652	dng	5	5	1
FieldData\Mason Neck Pictures\Individuals\7-11_1	6	PXL_20220711_125627361.dng	88	PXL_20220711_125627361	dng	6	6	1
FieldData\Mason Neck Pictures\Individuals\7-11_1	7	PXL_20220711_125640970.dng	89	PXL_20220711_125640970	dng	7	7	1
FieldData\Mason Neck Pictures\Individuals\7-11_1	8	PXL_20220711_125644438.dng	90	PXL_20220711_125644438	dng	8	8	1
FieldData\Mason Neck Pictures\Individuals\7-11_1	9	PXL_20220711_125656778.dng	91	PXL_20220711_125656778	dng	9	9	1
FieldData\Mason Neck Pictures\Individuals\7-11_1	10	PXL_20220711_125743980.dng	92	PXL_20220711_125743980	dng	10	10	1
FieldData\Mason Neck Pictures\Individuals\7-11_1	11	PXL_20220711_125840730.dng	93	PXL_20220711_125840730	dng	11	11	1
FieldData\Mason Neck Pictures\Individuals\7-11_1	12	PXL_20220711_125851725.dng	94	PXL_20220711_125851725	dng	12	12	1
FieldData\Mason Neck Pictures\Individuals\7-11_2	1	PXL_20220711_142111126.dng	97	PXL_20220711_142111126	dng	1	1	1
FieldData\Mason Neck Pictures\Individuals\7-11_2	2	PXL_20220711_142113730.dng	98	PXL_20220711_142113730	dng	2	2	1
FieldData\Mason Neck Pictures\Individuals\7-11_2	3	PXL_20220711_142845119.dng	99	PXL_20220711_142845119	dng	3	3	1
FieldData\Mason Neck Pictures\Individuals\7-11_2	4	PXL_20220711_142909630.dng	100	PXL_20220711_142909630	dng	4	4	1
FieldData\Mason Neck Pictures\Individuals\7-11_2	5	PXL_20220711_142939588.dng	101	PXL_20220711_142939588	dng	5	5	1
FieldData\Mason Neck Pictures\Individuals\7-11_2	6	PXL_20220711_142941958.dng	102	PXL_20220711_142941958	dng	6	6	1
FieldData\Mason Neck Pictures\Individuals\7-11_2	7	PXL_20220711_142955711.dng	103	PXL_20220711_142955711	dng	7	7	1
FieldData\Mason Neck Pictures\Individuals\7-11_2	8	PXL_20220711_142957362.dng	104	PXL_20220711_142957362	dng	8	8	1
FieldData\Mason Neck Pictures\Individuals\7-11_2	9	PXL_20220711_143018497.dng	105	PXL_20220711_143018497	dng	9	9	1
FieldData\Mason Neck Pictures\Individuals\7-11_2	10	PXL_20220711_143019787.dng	106	PXL_20220711_143019787	dng	10	10	1
FieldData\Mason Neck Pictures\Individuals\7-11_3	1	PXL_20220711_153616694.dng	108	PXL_20220711_153616694	dng	1	1	1
FieldData\Mason Neck Pictures\Individuals\7-11_3	2	PXL_20220711_153620017.dng	109	PXL_20220711_153620017	dng	2	2	1
FieldData\Mason Neck Pictures\Individuals\7-11_3	3	PXL_20220711_153750558.dng	110	PXL_20220711_153750558	dng	3	3	1
FieldData\Mason Neck Pictures\Individuals\7-11_3	4	PXL_20220711_153758230.dng	111	PXL_20220711_153758230	dng	4	4	1
FieldData\Mason Neck Pictures\Individuals\7-11_3	5	PXL_20220711_153815925.dng	112	PXL_20220711_153815925	dng	5	5	1
FieldData\Mason Neck Pictures\Individuals\7-11_3	6	PXL_20220711_153817981.dng	113	PXL_20220711_153817981	dng	6	6	1
FieldData\Mason Neck Pictures\Individuals\7-11_3	7	PXL_20220711_153824608.dng	114	PXL_20220711_153824608	dng	7	7	1
FieldData\Mason Neck Pictures\Individuals\7-11_3	8	PXL_20220711_153825863.dng	115	PXL_20220711_153825863	dng	8	8	1
FieldData\Mason Neck Pictures\Individuals\7-11_3	9	PXL_20220711_153849225.dng	116	PXL_20220711_153849225	dng	9	9	1
FieldData\Mason Neck Pictures\Individuals\7-11_3	10	PXL_20220711_153850210.dng	117	PXL_20220711_153850210	dng	10	10	1
FieldData\Mason Neck Pictures\Individuals\7-11_4	1	PXL_20220711_160228455.dng	120	PXL_20220711_160228455	dng	1	1	1
FieldData\Mason Neck Pictures\Individuals\7-11_4	2	PXL_20220711_160229967.dng	121	PXL_20220711_160229967	dng	2	2	1
FieldData\Mason Neck Pictures\Individuals\7-11_4	3	PXL_20220711_160349067.dng	122	PXL_20220711_160349067	dng	3	3	1
FieldData\Mason Neck Pictures\Individuals\7-11_4	4	PXL_20220711_160350180.dng	123	PXL_20220711_160350180	dng	4	4	1
FieldData\Mason Neck Pictures\Individuals\7-11_4	5	PXL_20220711_160407837.dng	124	PXL_20220711_160407837	dng	5	5	1
FieldData\Mason Neck Pictures\Individuals\7-11_4	6	PXL_20220711_160409317.dng	125	PXL_20220711_160409317	dng	6	6	1
FieldData\Mason Neck Pictures\Individuals\7-11_4	7	PXL_20220711_160419231.dng	126	PXL_20220711_160419231	dng	7	7	1
FieldData\Mason Neck Pictures\Individuals\7-11_4	8	PXL_20220711_160420892.dng	127	PXL_20220711_160420892	dng	8	8	1
FieldData\Mason Neck Pictures\Individuals\7-11_4	9	PXL_20220711_160435186.dng	128	PXL_20220711_160435186	dng	9	9	1
FieldData\Mason Neck Pictures\Individuals\7-11_4	10	PXL_20220711_160436784.dng	129	PXL_20220711_160436784	dng	10	10	1
FieldData\Mason Neck Pictures\Individuals\7-12_5	1	PXL_20220712_154142065.dng	132	PXL_20220712_154142065	dng	1	1	1
FieldData\Mason Neck Pictures\Individuals\7-12_5	2	PXL_20220712_154144737.dng	133	PXL_20220712_154144737	dng	2	2	1
FieldData\Mason Neck Pictures\Individuals\7-12_5	3	PXL_20220712_154356192.dng	134	PXL_20220712_154356192	dng	3	3	1
FieldData\Mason Neck Pictures\Individuals\7-12_5	4	PXL_20220712_154359359.dng	135	PXL_20220712_154359359	dng	4	4	1
FieldData\Mason Neck Pictures\Individuals\7-12_5	5	PXL_20220712_154411970.dng	136	PXL_20220712_154411970	dng	5	5	1
FieldData\Mason Neck Pictures\Individuals\7-12_5	6	PXL_20220712_154414098.dng	137	PXL_20220712_154414098	dng	6	6	1
FieldData\Mason Neck Pictures\Individuals\7-12_5	7	PXL_20220712_154423152.dng	138	PXL_20220712_154423152	dng	7	7	1
FieldData\Mason Neck Pictures\Individuals\7-12_5	8	PXL_20220712_154425548.dng	139	PXL_20220712_154425548	dng	8	8	1
FieldData\Mason Neck Pictures\Individuals\7-12_5	9	PXL_20220712_154439305.dng	140	PXL_20220712_154439305	dng	9	9	1
FieldData\Mason Neck Pictures\Individuals\7-12_5	10	PXL_20220712_154441401.dng	141	PXL_20220712_154441401	dng	10	10	1
FieldData\Mason Neck Pictures\Individuals\7-13_6	1	PXL_20220713_141442936.dng	144	PXL_20220713_141442936	dng	1	1	1
FieldData\Mason Neck Pictures\Individuals\7-13_6	2	PXL_20220713_141450724.dng	145	PXL_20220713_141450724	dng	2	2	1
FieldData\Mason Neck Pictures\Individuals\7-13_6	3	PXL_20220713_141639171.dng	146	PXL_20220713_141639171	dng	3	3	1
FieldData\Mason Neck Pictures\Individuals\7-13_6	4	PXL_20220713_141640428.dng	147	PXL_20220713_141640428	dng	4	4	1
FieldData\Mason Neck Pictures\Individuals\7-13_6	5	PXL_20220713_141714217.dng	148	PXL_20220713_141714217	dng	5	5	1
FieldData\Mason Neck Pictures\Individuals\7-13_6	6	PXL_20220713_141720911.dng	149	PXL_20220713_141720911	dng	6	6	1
FieldData\Mason Neck Pictures\Individuals\7-13_6	7	PXL_20220713_141736888.dng	150	PXL_20220713_141736888	dng	7	7	1
FieldData\Mason Neck Pictures\Individuals\7-13_6	8	PXL_20220713_141739058.dng	151	PXL_20220713_141739058	dng	8	8	1
FieldData\Mason Neck Pictures\Individuals\7-13_6	9	PXL_20220713_141755603.dng	152	PXL_20220713_141755603	dng	9	9	1
FieldData\Mason Neck Pictures\Individuals\7-13_6	10	PXL_20220713_141802101.dng	153	PXL_20220713_141802101	dng	10	10	1
FieldData\Mason Neck Pictures\Individuals\7-13_7	1	PXL_20220713_150031922.dng	154	PXL_20220713_150031922	dng	1	1	1
FieldData\Mason Neck Pictures\Individuals\7-13_7	2	PXL_20220713_150034164.dng	155	PXL_20220713_150034164	dng	2	2	1
FieldData\Mason Neck Pictures\Individuals\7-13_7	3	PXL_20220713_150228367.dng	156	PXL_20220713_150228367	dng	3	3	1
FieldData\Mason Neck Pictures\Individuals\7-13_7	4	PXL_20220713_150230092.dng	157	PXL_20220713_150230092	dng	4	4	1
FieldData\Mason Neck Pictures\Individuals\7-13_7	5	PXL_20220713_150314792.dng	158	PXL_20220713_150314792	dng	5	5	1
FieldData\Mason Neck Pictures\Individuals\7-13_7	6	PXL_20220713_150316608.dng	159	PXL_20220713_150316608	dng	6	6	1
FieldData\Mason Neck Pictures\Individuals\7-13_7	7	PXL_20220713_150447043.dng	160	PXL_20220713_150447043	dng	7	7	1
FieldData\Mason Neck Pictures\Individuals\7-13_7	8	PXL_20220713_150503880.dng	161	PXL_20220713_150503880	dng	8	8	1
FieldData\Mason Neck Pictures\Individuals\7-13_7	9	PXL_20220713_150602626.dng	162	PXL_20220713_150602626	dng	9	9	1
FieldData\Mason Neck Pictures\Individuals\7-13_7	10	PXL_20220713_150604681.dng	163	PXL_20220713_150604681	dng	10	10	1
FieldData\Mason Neck Pictures\Individuals\7-13_8	1	PXL_20220713_152302626.dng	165	PXL_20220713_152302626	dng	1	1	1
FieldData\Mason Neck Pictures\Individuals\7-13_8	2	PXL_20220713_152304421.dng	166	PXL_20220713_152304421	dng	2	2	1
FieldData\Mason Neck Pictures\Individuals\7-13_8	3	PXL_20220713_152607219.dng	167	PXL_20220713_152607219	dng	3	3	1
FieldData\Mason Neck Pictures\Individuals\7-13_8	4	PXL_20220713_152610938.dng	168	PXL_20220713_152610938	dng	4	4	1
FieldData\Mason Neck Pictures\Individuals\7-13_8	5	PXL_20220713_152655574.dng	169	PXL_20220713_152655574	dng	5	5	1
FieldData\Mason Neck Pictures\Individuals\7-13_8	6	PXL_20220713_152700624.dng	170	PXL_20220713_152700624	dng	6	6	1
FieldData\Mason Neck Pictures\Individuals\7-13_8	7	PXL_20220713_152711751.dng	171	PXL_20220713_152711751	dng	7	7	1
FieldData\Mason Neck Pictures\Individuals\7-13_8	8	PXL_20220713_152714210.dng	172	PXL_20220713_152714210	dng	8	8	1
FieldData\Mason Neck Pictures\Individuals\7-13_8	9	PXL_20220713_152730946.dng	173	PXL_20220713_152730946	dng	9	9	1
FieldData\Mason Neck Pictures\Individuals\7-13_8	10	PXL_20220713_152732196.dng	174	PXL_20220713_152732196	dng	10	10	1
FieldData\Mason Neck Pictures\Individuals\7-13_9	1	PXL_20220713_162313207.dng	176	PXL_20220713_162313207	dng	1	1	1
FieldData\Mason Neck Pictures\Individuals\7-13_9	2	PXL_20220713_162314747.dng	177	PXL_20220713_162314747	dng	2	2	1
FieldData\Mason Neck Pictures\Individuals\7-13_9	3	PXL_20220713_162522472.dng	178	PXL_20220713_162522472	dng	3	3	1
FieldData\Mason Neck Pictures\Individuals\7-13_9	4	PXL_20220713_162526569.dng	179	PXL_20220713_162526569	dng	4	4	1
FieldData\Mason Neck Pictures\Individuals\7-13_9	5	PXL_20220713_162616058.dng	180	PXL_20220713_162616058	dng	5	5	1
FieldData\Mason Neck Pictures\Individuals\7-13_9	6	PXL_20220713_162617242.dng	181	PXL_20220713_162617242	dng	6	6	1
FieldData\Mason Neck Pictures\Individuals\7-13_9	7	PXL_20220713_162624192.dng	182	PXL_20220713_162624192	dng	7	7	1
FieldData\Mason Neck Pictures\Individuals\7-13_9	8	PXL_20220713_162625236.dng	183	PXL_20220713_162625236	dng	8	8	1
FieldData\Mason Neck Pictures\Individuals\7-13_9	9	PXL_20220713_162637083.dng	184	PXL_20220713_162637083	dng	9	9	1
FieldData\Mason Neck Pictures\Individuals\7-13_9	10	PXL_20220713_162643412.dng	185	PXL_20220713_162643412	dng	10	10	1
FieldData\Mason Neck Pictures\Individuals\7-20_10	1	PXL_20220720_134358844.dng	187	PXL_20220720_134358844	dng	1	1	1
FieldData\Mason Neck Pictures\Individuals\7-20_10	2	PXL_20220720_134400446.dng	188	PXL_20220720_134400446	dng	2	2	1
FieldData\Mason Neck Pictures\Individuals\7-20_10	3	PXL_20220720_134513666.dng	189	PXL_20220720_134513666	dng	3	3	1
FieldData\Mason Neck Pictures\Individuals\7-20_10	4	PXL_20220720_134515727.dng	190	PXL_20220720_134515727	dng	4	4	1
FieldData\Mason Neck Pictures\Individuals\7-20_10	5	PXL_20220720_134540875.dng	191	PXL_20220720_134540875	dng	5	5	1
FieldData\Mason Neck Pictures\Individuals\7-20_10	6	PXL_20220720_134544069.dng	192	PXL_20220720_134544069	dng	6	6	1
FieldData\Mason Neck Pictures\Individuals\7-20_10	7	PXL_20220720_134556482.dng	193	PXL_20220720_134556482	dng	7	7	1
FieldData\Mason Neck Pictures\Individuals\7-20_10	8	PXL_20220720_134602194.dng	194	PXL_20220720_134602194	dng	8	8	1
FieldData\Mason Neck Pictures\Individuals\7-20_10	9	PXL_20220720_134616766.dng	195	PXL_20220720_134616766	dng	9	9	1
FieldData\Mason Neck Pictures\Individuals\7-20_10	10	PXL_20220720_134618170.dng	196	PXL_20220720_134618170	dng	10	10	1
FieldData\Mason Neck Pictures\Individuals\7-20_11	1	PXL_20220720_142411583.dng	198	PXL_20220720_142411583	dng	1	1	1
FieldData\Mason Neck Pictures\Individuals\7-20_11	2	PXL_20220720_142419166.dng	199	PXL_20220720_142419166	dng	2	2	1
FieldData\Mason Neck Pictures\Individuals\7-20_11	3	PXL_20220720_142535008.dng	200	PXL_20220720_142535008	dng	3	3	1
FieldData\Mason Neck Pictures\Individuals\7-20_11	4	PXL_20220720_142536505.dng	201	PXL_20220720_142536505	dng	4	4	1
FieldData\Mason Neck Pictures\Individuals\7-20_11	5	PXL_20220720_142552533.dng	202	PXL_20220720_142552533	dng	5	5	1
FieldData\Mason Neck Pictures\Individuals\7-20_11	6	PXL_20220720_142555838.dng	203	PXL_20220720_142555838	dng	6	6	1
FieldData\Mason Neck Pictures\Individuals\7-20_11	7	PXL_20220720_142612361.dng	204	PXL_20220720_142612361	dng	7	7	1
FieldData\Mason Neck Pictures\Individuals\7-20_11	8	PXL_20220720_142614410.dng	205	PXL_20220720_142614410	dng	8	8	1
FieldData\Mason Neck Pictures\Individuals\7-20_11	9	PXL_20220720_142636814.dng	206	PXL_20220720_142636814	dng	9	9	1
FieldData\Mason Neck Pictures\Individuals\7-20_11	10	PXL_20220720_142638729.dng	207	PXL_20220720_142638729	dng	10	10	1
FieldData\Mason Neck Pictures\Individuals\7-20_12	1	PXL_20220720_152834289.dng	209	PXL_20220720_152834289	dng	1	1	1
FieldData\Mason Neck Pictures\Individuals\7-20_12	2	PXL_20220720_152835072.dng	210	PXL_20220720_152835072	dng	2	2	1
FieldData\Mason Neck Pictures\Individuals\7-20_12	3	PXL_20220720_152922806.dng	211	PXL_20220720_152922806	dng	3	3	1
FieldData\Mason Neck Pictures\Individuals\7-20_12	4	PXL_20220720_152925210.dng	212	PXL_20220720_152925210	dng	4	4	1
FieldData\Mason Neck Pictures\Individuals\7-20_12	5	PXL_20220720_152937354.dng	213	PXL_20220720_152937354	dng	5	5	1
FieldData\Mason Neck Pictures\Individuals\7-20_12	6	PXL_20220720_152940331.dng	214	PXL_20220720_152940331	dng	6	6	1
FieldData\Mason Neck Pictures\Individuals\7-20_12	7	PXL_20220720_153007377.dng	215	PXL_20220720_153007377	dng	7	7	1
FieldData\Mason Neck Pictures\Individuals\7-20_12	8	PXL_20220720_153008393.dng	216	PXL_20220720_153008393	dng	8	8	1
FieldData\Mason Neck Pictures\Individuals\7-20_12	9	PXL_20220720_153020707.dng	217	PXL_20220720_153020707	dng	9	9	1
FieldData\Mason Neck Pictures\Individuals\7-20_12	10	PXL_20220720_153024766.dng	218	PXL_20220720_153024766	dng	10	10	1
FieldData\Mason Neck Pictures\Individuals\7-20_13	1	PXL_20220720_160232008.dng	220	PXL_20220720_160232008	dng	1	1	1
FieldData\Mason Neck Pictures\Individuals\7-20_13	2	PXL_20220720_160233720.dng	221	PXL_20220720_160233720	dng	2	2	1
FieldData\Mason Neck Pictures\Individuals\7-20_13	3	PXL_20220720_160314992.dng	222	PXL_20220720_160314992	dng	3	3	1
FieldData\Mason Neck Pictures\Individuals\7-20_13	4	PXL_20220720_160317123.dng	223	PXL_20220720_160317123	dng	4	4	1
FieldData\Mason Neck Pictures\Individuals\7-20_13	5	PXL_20220720_160336718.dng	224	PXL_20220720_160336718	dng	5	5	1
FieldData\Mason Neck Pictures\Individuals\7-20_13	6	PXL_20220720_160341864.dng	225	PXL_20220720_160341864	dng	6	6	1
FieldData\Mason Neck Pictures\Individuals\7-20_13	7	PXL_20220720_160410116.dng	226	PXL_20220720_160410116	dng	7	7	1
FieldData\Mason Neck Pictures\Individuals\7-20_13	8	PXL_20220720_160411747.dng	227	PXL_20220720_160411747	dng	8	8	1
FieldData\Mason Neck Pictures\Individuals\7-20_13	9	PXL_20220720_160432348.dng	228	PXL_20220720_160432348	dng	9	9	1
FieldData\Mason Neck Pictures\Individuals\7-20_13	10	PXL_20220720_160433340.dng	229	PXL_20220720_160433340	dng	10	10	1
FieldData\Mason Neck Pictures\Individuals\7-21_14	1	PXL_20220721_155821966.dng	231	PXL_20220721_155821966	dng	1	1	1
FieldData\Mason Neck Pictures\Individuals\7-21_14	2	PXL_20220721_155822816.dng	232	PXL_20220721_155822816	dng	2	2	1
FieldData\Mason Neck Pictures\Individuals\7-21_14	3	PXL_20220721_155905227.dng	233	PXL_20220721_155905227	dng	3	3	1
FieldData\Mason Neck Pictures\Individuals\7-21_14	4	PXL_20220721_155910576.dng	234	PXL_20220721_155910576	dng	4	4	1
FieldData\Mason Neck Pictures\Individuals\7-21_14	5	PXL_20220721_155929373.dng	235	PXL_20220721_155929373	dng	5	5	1
FieldData\Mason Neck Pictures\Individuals\7-21_14	6	PXL_20220721_155931455.dng	236	PXL_20220721_155931455	dng	6	6	1
FieldData\Mason Neck Pictures\Individuals\7-21_14	7	PXL_20220721_155940491.dng	237	PXL_20220721_155940491	dng	7	7	1
FieldData\Mason Neck Pictures\Individuals\7-21_14	8	PXL_20220721_155942900.dng	238	PXL_20220721_155942900	dng	8	8	1
FieldData\Mason Neck Pictures\Individuals\7-21_14	9	PXL_20220721_155952022.dng	239	PXL_20220721_155952022	dng	9	9	1
FieldData\Mason Neck Pictures\Individuals\7-21_14	10	PXL_20220721_155953541.dng	240	PXL_20220721_155953541	dng	10	10	1
FieldData\Mason Neck Pictures\Individuals\7-21_15	1	PXL_20220721_144054139.dng	242	PXL_20220721_144054139	dng	1	1	1
FieldData\Mason Neck Pictures\Individuals\7-21_15	2	PXL_20220721_144100479.dng	243	PXL_20220721_144100479	dng	2	2	1
FieldData\Mason Neck Pictures\Individuals\7-21_15	3	PXL_20220721_144439614.dng	244	PXL_20220721_144439614	dng	3	3	1
FieldData\Mason Neck Pictures\Individuals\7-21_15	4	PXL_20220721_144441076.dng	245	PXL_20220721_144441076	dng	4	4	1
FieldData\Mason Neck Pictures\Individuals\7-21_15	5	PXL_20220721_144457811.dng	246	PXL_20220721_144457811	dng	5	5	1
FieldData\Mason Neck Pictures\Individuals\7-21_15	6	PXL_20220721_144459439.dng	247	PXL_20220721_144459439	dng	6	6	1
FieldData\Mason Neck Pictures\Individuals\7-21_15	7	PXL_20220721_144513431.dng	248	PXL_20220721_144513431	dng	7	7	1
FieldData\Mason Neck Pictures\Individuals\7-21_15	8	PXL_20220721_144514369.dng	249	PXL_20220721_144514369	dng	8	8	1
FieldData\Mason Neck Pictures\Individuals\7-21_15	9	PXL_20220721_144530780.dng	250	PXL_20220721_144530780	dng	9	9	1
FieldData\Mason Neck Pictures\Individuals\7-21_15	10	PXL_20220721_144533514.dng	251	PXL_20220721_144533514	dng	10	10	1
FieldData\Mason Neck Pictures\Individuals\7-21_21x	1	PXL_20220721_143458920.dng	253	PXL_20220721_143458920	dng	1	1	1
FieldData\Mason Neck Pictures\Individuals\7-21_21x	2	PXL_20220721_143459849.dng	254	PXL_20220721_143459849	dng	2	2	1
FieldData\Mason Neck Pictures\Individuals\7-21_21x	3	PXL_20220721_143624294.dng	255	PXL_20220721_143624294	dng	3	3	1
FieldData\Mason Neck Pictures\Individuals\7-21_21x	4	PXL_20220721_143625538.dng	256	PXL_20220721_143625538	dng	4	4	1
FieldData\Mason Neck Pictures\Individuals\7-21_21x	5	PXL_20220721_143653987.dng	257	PXL_20220721_143653987	dng	5	5	1
FieldData\Mason Neck Pictures\Individuals\7-21_21x	6	PXL_20220721_143655351.dng	258	PXL_20220721_143655351	dng	6	6	1
FieldData\Mason Neck Pictures\Individuals\7-21_21x	7	PXL_20220721_143712539.dng	259	PXL_20220721_143712539	dng	7	7	1
FieldData\Mason Neck Pictures\Individuals\7-21_21x	8	PXL_20220721_143714159.dng	260	PXL_20220721_143714159	dng	8	8	1
FieldData\Mason Neck Pictures\Individuals\7-21_21x	9	PXL_20220721_143729171.dng	261	PXL_20220721_143729171	dng	9	9	1
FieldData\Mason Neck Pictures\Individuals\7-21_21x	10	PXL_20220721_143733722.dng	262	PXL_20220721_143733722	dng	10	10	1
FieldData\Mason Neck Pictures\Individuals\7-25_16	1	PXL_20220725_135537694.dng	264	PXL_20220725_135537694	dng	1	1	1
FieldData\Mason Neck Pictures\Individuals\7-25_16	2	PXL_20220725_135538957.dng	265	PXL_20220725_135538957	dng	2	2	1
FieldData\Mason Neck Pictures\Individuals\7-25_16	3	PXL_20220725_135656512.dng	266	PXL_20220725_135656512	dng	3	3	1
FieldData\Mason Neck Pictures\Individuals\7-25_16	4	PXL_20220725_135658563.dng	267	PXL_20220725_135658563	dng	4	4	1
FieldData\Mason Neck Pictures\Individuals\7-25_16	5	PXL_20220725_135711237.dng	268	PXL_20220725_135711237	dng	5	5	1
FieldData\Mason Neck Pictures\Individuals\7-25_16	6	PXL_20220725_135714159.dng	269	PXL_20220725_135714159	dng	6	6	1
FieldData\Mason Neck Pictures\Individuals\7-25_16	7	PXL_20220725_135748709.dng	270	PXL_20220725_135748709	dng	7	7	1
FieldData\Mason Neck Pictures\Individuals\7-25_16	8	PXL_20220725_135750898.dng	271	PXL_20220725_135750898	dng	8	8	1
FieldData\Mason Neck Pictures\Individuals\7-25_16	9	PXL_20220725_135847946.dng	272	PXL_20220725_135847946	dng	9	9	1
FieldData\Mason Neck Pictures\Individuals\7-25_16	10	PXL_20220725_135853280.dng	273	PXL_20220725_135853280	dng	10	10	1
FieldData\Mason Neck Pictures\Individuals\7-25_440x	1	PXL_20220725_132646976.dng	275	PXL_20220725_132646976	dng	1	1	1
FieldData\Mason Neck Pictures\Individuals\7-25_440x	2	PXL_20220725_132648441.dng	276	PXL_20220725_132648441	dng	2	2	1
FieldData\Mason Neck Pictures\Individuals\7-25_440x	3	PXL_20220725_132815424.dng	277	PXL_20220725_132815424	dng	3	3	1
FieldData\Mason Neck Pictures\Individuals\7-25_440x	4	PXL_20220725_132820282.dng	278	PXL_20220725_132820282	dng	4	4	1
FieldData\Mason Neck Pictures\Individuals\7-25_440x	5	PXL_20220725_132835974.dng	279	PXL_20220725_132835974	dng	5	5	1
FieldData\Mason Neck Pictures\Individuals\7-25_440x	6	PXL_20220725_132838452.dng	280	PXL_20220725_132838452	dng	6	6	1
FieldData\Mason Neck Pictures\Individuals\7-25_440x	7	PXL_20220725_132850236.dng	281	PXL_20220725_132850236	dng	7	7	1
FieldData\Mason Neck Pictures\Individuals\7-25_440x	8	PXL_20220725_132851865.dng	282	PXL_20220725_132851865	dng	8	8	1
FieldData\Mason Neck Pictures\Individuals\7-25_440x	9	PXL_20220725_132909401.dng	283	PXL_20220725_132909401	dng	9	9	1
FieldData\Mason Neck Pictures\Individuals\7-25_440x	10	PXL_20220725_132912720.dng	284	PXL_20220725_132912720	dng	10	10	1
FieldData\Mason Neck Pictures\Individuals\7-27_11x	1	PXL_20220727_154351819.dng	286	PXL_20220727_154351819	dng	1	1	1
FieldData\Mason Neck Pictures\Individuals\7-27_11x	2	PXL_20220727_154354404.dng	287	PXL_20220727_154354404	dng	2	2	1
FieldData\Mason Neck Pictures\Individuals\7-27_11x	3	PXL_20220727_154516191.dng	288	PXL_20220727_154516191	dng	3	3	1
FieldData\Mason Neck Pictures\Individuals\7-27_11x	4	PXL_20220727_154518966.dng	289	PXL_20220727_154518966	dng	4	4	1
FieldData\Mason Neck Pictures\Individuals\7-27_11x	5	PXL_20220727_154543858.dng	290	PXL_20220727_154543858	dng	5	5	1
FieldData\Mason Neck Pictures\Individuals\7-27_11x	6	PXL_20220727_154546904.dng	291	PXL_20220727_154546904	dng	6	6	1
FieldData\Mason Neck Pictures\Individuals\7-27_11x	7	PXL_20220727_154618073.dng	292	PXL_20220727_154618073	dng	7	7	1
FieldData\Mason Neck Pictures\Individuals\7-27_11x	8	PXL_20220727_154619669.dng	293	PXL_20220727_154619669	dng	8	8	1
FieldData\Mason Neck Pictures\Individuals\7-27_11x	9	PXL_20220727_154705913.dng	294	PXL_20220727_154705913	dng	9	9	1
FieldData\Mason Neck Pictures\Individuals\7-27_11x	10	PXL_20220727_154709524.dng	295	PXL_20220727_154709524	dng	10	10	1
FieldData\Mason Neck Pictures\Individuals\8-2_17	1	PXL_20220802_150041767.dng	297	PXL_20220802_150041767	dng	1	1	1
FieldData\Mason Neck Pictures\Individuals\8-2_17	2	PXL_20220802_150042524.dng	298	PXL_20220802_150042524	dng	2	2	1
FieldData\Mason Neck Pictures\Individuals\8-2_17	3	PXL_20220802_150227898.dng	299	PXL_20220802_150227898	dng	3	3	1
FieldData\Mason Neck Pictures\Individuals\8-2_17	4	PXL_20220802_150229540.dng	300	PXL_20220802_150229540	dng	4	4	1
FieldData\Mason Neck Pictures\Individuals\8-2_17	5	PXL_20220802_150242477.dng	301	PXL_20220802_150242477	dng	5	5	1
FieldData\Mason Neck Pictures\Individuals\8-2_17	6	PXL_20220802_150247850.dng	302	PXL_20220802_150247850	dng	6	6	1
FieldData\Mason Neck Pictures\Individuals\8-2_17	7	PXL_20220802_150304188.dng	303	PXL_20220802_150304188	dng	7	7	1
FieldData\Mason Neck Pictures\Individuals\8-2_17	8	PXL_20220802_150306205.dng	304	PXL_20220802_150306205	dng	8	8	1
FieldData\Smithsonian Pictures\Central VA (near Richmond)\Adult\324296	1	PXL_20230207_185849679.dng	381	PXL_20230207_185849679	dng	1	1	1
FieldData\Smithsonian Pictures\Central VA (near Richmond)\Adult\324296	2	PXL_20230207_185854089.dng	382	PXL_20230207_185854089	dng	2	2	1
FieldData\Smithsonian Pictures\Central VA (near Richmond)\Adult\324296	3	PXL_20230207_185855725.dng	383	PXL_20230207_185855725	dng	3	3	1
FieldData\Smithsonian Pictures\Central VA (near Richmond)\Adult\324296	4	PXL_20230207_185908816.dng	384	PXL_20230207_185908816	dng	4	4	1
FieldData\Smithsonian Pictures\Central VA (near Richmond)\Adult\324296	5	PXL_20230207_185909847.dng	385	PXL_20230207_185909847	dng	5	5	1
FieldData\Smithsonian Pictures\Central VA (near Richmond)\Adult\324296	6	PXL_20230207_185921044.dng	386	PXL_20230207_185921044	dng	6	6	1
FieldData\Smithsonian Pictures\Central VA (near Richmond)\Adult\324296	7	PXL_20230207_185922031.dng	387	PXL_20230207_185922031	dng	7	7	1
FieldData\Smithsonian Pictures\Central VA (near Richmond)\Adult\324296	8	PXL_20230207_185932384.dng	388	PXL_20230207_185932384	dng	8	8	1
FieldData\Smithsonian Pictures\Central VA (near Richmond)\Adult\324296	9	PXL_20230207_185933461.dng	389	PXL_20230207_185933461	dng	9	9	1
FieldData\Smithsonian Pictures\Central VA (near Richmond)\Adult\324296	10	PXL_20230207_185942263.dng	390	PXL_20230207_185942263	dng	10	10	1
FieldData\Smithsonian Pictures\Central VA (near Richmond)\Adult\324296	11	PXL_20230207_185943008.dng	391	PXL_20230207_185943008	dng	11	11	1
FieldData\Smithsonian Pictures\Central VA (near Richmond)\Adult\497193	1	PXL_20230208_195917741.dng	392	PXL_20230208_195917741	dng	1	1	1
FieldData\Smithsonian Pictures\Central VA (near Richmond)\Adult\497193	2	PXL_20230208_195920766.dng	393	PXL_20230208_195920766	dng	2	2	1
FieldData\Smithsonian Pictures\Central VA (near Richmond)\Adult\497193	3	PXL_20230208_195923511.dng	394	PXL_20230208_195923511	dng	3	3	1
FieldData\Smithsonian Pictures\Central VA (near Richmond)\Adult\497193	4	PXL_20230208_195936016.dng	395	PXL_20230208_195936016	dng	4	4	1
FieldData\Smithsonian Pictures\Central VA (near Richmond)\Adult\497193	5	PXL_20230208_195938037.dng	396	PXL_20230208_195938037	dng	5	5	1
FieldData\Smithsonian Pictures\Central VA (near Richmond)\Adult\497193	6	PXL_20230208_195949412.dng	397	PXL_20230208_195949412	dng	6	6	1
FieldData\Smithsonian Pictures\Central VA (near Richmond)\Adult\497193	7	PXL_20230208_195950248.dng	398	PXL_20230208_195950248	dng	7	7	1
FieldData\Smithsonian Pictures\Central VA (near Richmond)\Adult\497193	8	PXL_20230208_195957780.dng	399	PXL_20230208_195957780	dng	8	8	1
FieldData\Smithsonian Pictures\Central VA (near Richmond)\Adult\497193	9	PXL_20230208_195959400.dng	400	PXL_20230208_195959400	dng	9	9	1
FieldData\Smithsonian Pictures\Central VA (near Richmond)\Adult\497193	10	PXL_20230208_200007589.dng	401	PXL_20230208_200007589	dng	10	10	1
FieldData\Smithsonian Pictures\Central VA (near Richmond)\Adult\497193	11	PXL_20230208_200009208.dng	402	PXL_20230208_200009208	dng	11	11	1
FieldData\Smithsonian Pictures\Central VA (near Richmond)\Adult\497202	1	PXL_20230208_193158011.dng	403	PXL_20230208_193158011	dng	1	1	1
FieldData\Smithsonian Pictures\Central VA (near Richmond)\Adult\497202	2	PXL_20230208_193203034.dng	404	PXL_20230208_193203034	dng	2	2	1
FieldData\Smithsonian Pictures\Central VA (near Richmond)\Adult\497202	3	PXL_20230208_193206182.dng	405	PXL_20230208_193206182	dng	3	3	1
FieldData\Smithsonian Pictures\Central VA (near Richmond)\Adult\497202	4	PXL_20230208_193222771.dng	406	PXL_20230208_193222771	dng	4	4	1
FieldData\Smithsonian Pictures\Central VA (near Richmond)\Adult\497202	5	PXL_20230208_193225142.dng	407	PXL_20230208_193225142	dng	5	5	1
FieldData\Smithsonian Pictures\Central VA (near Richmond)\Adult\497202	6	PXL_20230208_193236673.dng	408	PXL_20230208_193236673	dng	6	6	1
FieldData\Smithsonian Pictures\Central VA (near Richmond)\Adult\497202	7	PXL_20230208_193237580.dng	409	PXL_20230208_193237580	dng	7	7	1
FieldData\Smithsonian Pictures\Central VA (near Richmond)\Adult\497202	8	PXL_20230208_193246637.dng	410	PXL_20230208_193246637	dng	8	8	1
FieldData\Smithsonian Pictures\Central VA (near Richmond)\Adult\497202	9	PXL_20230208_193249322.dng	411	PXL_20230208_193249322	dng	9	9	1
FieldData\Smithsonian Pictures\Central VA (near Richmond)\Adult\497202	10	PXL_20230208_193254542.dng	412	PXL_20230208_193254542	dng	10	10	1
FieldData\Smithsonian Pictures\Central VA (near Richmond)\Adult\497202	11	PXL_20230208_193257709.dng	413	PXL_20230208_193257709	dng	11	11	1
FieldData\Smithsonian Pictures\Central VA (near Richmond)\Adult\497203	1	PXL_20230208_193429993.dng	414	PXL_20230208_193429993	dng	1	1	1
FieldData\Smithsonian Pictures\Central VA (near Richmond)\Adult\497203	2	PXL_20230208_193434814.dng	415	PXL_20230208_193434814	dng	2	2	1
FieldData\Smithsonian Pictures\Central VA (near Richmond)\Adult\497203	3	PXL_20230208_193437106.dng	416	PXL_20230208_193437106	dng	3	3	1
FieldData\Smithsonian Pictures\Central VA (near Richmond)\Adult\497203	4	PXL_20230208_193447768.dng	417	PXL_20230208_193447768	dng	4	4	1
FieldData\Smithsonian Pictures\Central VA (near Richmond)\Adult\497203	5	PXL_20230208_193448864.dng	418	PXL_20230208_193448864	dng	5	5	1
FieldData\Smithsonian Pictures\Central VA (near Richmond)\Adult\497203	6	PXL_20230208_193501401.dng	419	PXL_20230208_193501401	dng	6	6	1
FieldData\Smithsonian Pictures\Central VA (near Richmond)\Adult\497203	7	PXL_20230208_193502173.dng	420	PXL_20230208_193502173	dng	7	7	1
FieldData\Smithsonian Pictures\Central VA (near Richmond)\Adult\497203	8	PXL_20230208_193511700.dng	421	PXL_20230208_193511700	dng	8	8	1
FieldData\Smithsonian Pictures\Central VA (near Richmond)\Adult\497203	9	PXL_20230208_193512542.dng	422	PXL_20230208_193512542	dng	9	9	1
FieldData\Smithsonian Pictures\Central VA (near Richmond)\Adult\497203	10	PXL_20230208_193523599.dng	423	PXL_20230208_193523599	dng	10	10	1
FieldData\Smithsonian Pictures\Central VA (near Richmond)\Adult\497203	11	PXL_20230208_193524925.dng	424	PXL_20230208_193524925	dng	11	11	1
FieldData\Smithsonian Pictures\Central VA (near Richmond)\Adult\497243	1	PXL_20230208_192438763.dng	425	PXL_20230208_192438763	dng	1	1	1
FieldData\Smithsonian Pictures\Central VA (near Richmond)\Adult\497243	2	PXL_20230208_192442434.dng	426	PXL_20230208_192442434	dng	2	2	1
FieldData\Smithsonian Pictures\Central VA (near Richmond)\Adult\497243	3	PXL_20230208_192444319.dng	427	PXL_20230208_192444319	dng	3	3	1
FieldData\Smithsonian Pictures\Central VA (near Richmond)\Adult\497243	4	PXL_20230208_192458804.dng	428	PXL_20230208_192458804	dng	4	4	1
FieldData\Smithsonian Pictures\Central VA (near Richmond)\Adult\497243	5	PXL_20230208_192459625.dng	429	PXL_20230208_192459625	dng	5	5	1
FieldData\Smithsonian Pictures\Central VA (near Richmond)\Adult\497243	6	PXL_20230208_192513393.dng	430	PXL_20230208_192513393	dng	6	6	1
FieldData\Smithsonian Pictures\Central VA (near Richmond)\Adult\497243	7	PXL_20230208_192514050.dng	431	PXL_20230208_192514050	dng	7	7	1
FieldData\Smithsonian Pictures\Central VA (near Richmond)\Adult\497243	8	PXL_20230208_192524370.dng	432	PXL_20230208_192524370	dng	8	8	1
FieldData\Smithsonian Pictures\Central VA (near Richmond)\Adult\497243	9	PXL_20230208_192525187.dng	433	PXL_20230208_192525187	dng	9	9	1
FieldData\Smithsonian Pictures\Central VA (near Richmond)\Adult\497243	10	PXL_20230208_192534585.dng	434	PXL_20230208_192534585	dng	10	10	1
FieldData\Smithsonian Pictures\Central VA (near Richmond)\Adult\497243	11	PXL_20230208_192536156.dng	435	PXL_20230208_192536156	dng	11	11	1
FieldData\Smithsonian Pictures\Central VA (near Richmond)\Adult\497248	1	PXL_20230208_190109360.dng	436	PXL_20230208_190109360	dng	1	1	1
FieldData\Smithsonian Pictures\Central VA (near Richmond)\Adult\497248	2	PXL_20230208_190113567.dng	437	PXL_20230208_190113567	dng	2	2	1
FieldData\Smithsonian Pictures\Central VA (near Richmond)\Adult\497248	3	PXL_20230208_190115874.dng	438	PXL_20230208_190115874	dng	3	3	1
FieldData\Smithsonian Pictures\Central VA (near Richmond)\Adult\497248	4	PXL_20230208_190134402.dng	439	PXL_20230208_190134402	dng	4	4	1
FieldData\Smithsonian Pictures\Central VA (near Richmond)\Adult\497248	5	PXL_20230208_190135060.dng	440	PXL_20230208_190135060	dng	5	5	1
FieldData\Smithsonian Pictures\Central VA (near Richmond)\Adult\497248	6	PXL_20230208_190144901.dng	441	PXL_20230208_190144901	dng	6	6	1
FieldData\Smithsonian Pictures\Central VA (near Richmond)\Adult\497248	7	PXL_20230208_190145547.dng	442	PXL_20230208_190145547	dng	7	7	1
FieldData\Smithsonian Pictures\Central VA (near Richmond)\Adult\497248	8	PXL_20230208_190157371.dng	443	PXL_20230208_190157371	dng	8	8	1
FieldData\Smithsonian Pictures\Central VA (near Richmond)\Adult\497248	9	PXL_20230208_190158053.dng	444	PXL_20230208_190158053	dng	9	9	1
FieldData\Smithsonian Pictures\Central VA (near Richmond)\Adult\497248	10	PXL_20230208_190206314.dng	445	PXL_20230208_190206314	dng	10	10	1
FieldData\Smithsonian Pictures\Central VA (near Richmond)\Adult\497248	11	PXL_20230208_190208643.dng	446	PXL_20230208_190208643	dng	11	11	1
FieldData\Smithsonian Pictures\Central VA (near Richmond)\Adult\497272	1	PXL_20230208_204446417.dng	447	PXL_20230208_204446417	dng	1	1	1
FieldData\Smithsonian Pictures\Central VA (near Richmond)\Adult\497272	2	PXL_20230208_204448398.dng	448	PXL_20230208_204448398	dng	2	2	1
FieldData\Smithsonian Pictures\Central VA (near Richmond)\Adult\497272	3	PXL_20230208_204449931.dng	449	PXL_20230208_204449931	dng	3	3	1
FieldData\Smithsonian Pictures\Central VA (near Richmond)\Adult\497272	4	PXL_20230208_204503566.dng	450	PXL_20230208_204503566	dng	4	4	1
FieldData\Smithsonian Pictures\Central VA (near Richmond)\Adult\497272	5	PXL_20230208_204504513.dng	451	PXL_20230208_204504513	dng	5	5	1
FieldData\Smithsonian Pictures\Central VA (near Richmond)\Adult\497272	6	PXL_20230208_204514005.dng	452	PXL_20230208_204514005	dng	6	6	1
FieldData\Smithsonian Pictures\Central VA (near Richmond)\Adult\497272	7	PXL_20230208_204514951.dng	453	PXL_20230208_204514951	dng	7	7	1
FieldData\Smithsonian Pictures\Central VA (near Richmond)\Adult\497272	8	PXL_20230208_204525269.dng	454	PXL_20230208_204525269	dng	8	8	1
FieldData\Smithsonian Pictures\Central VA (near Richmond)\Adult\497272	9	PXL_20230208_204525989.dng	455	PXL_20230208_204525989	dng	9	9	1
FieldData\Smithsonian Pictures\Central VA (near Richmond)\Adult\497272	10	PXL_20230208_204537496.dng	456	PXL_20230208_204537496	dng	10	10	1
FieldData\Smithsonian Pictures\Central VA (near Richmond)\Adult\497272	11	PXL_20230208_204538729.dng	457	PXL_20230208_204538729	dng	11	11	1
FieldData\Smithsonian Pictures\Central VA (near Richmond)\Adult\497276	1	PXL_20230208_204059328.dng	458	PXL_20230208_204059328	dng	1	1	1
FieldData\Smithsonian Pictures\Central VA (near Richmond)\Adult\497276	2	PXL_20230208_204102188.dng	459	PXL_20230208_204102188	dng	2	2	1
FieldData\Smithsonian Pictures\Central VA (near Richmond)\Adult\497276	3	PXL_20230208_204105029.dng	460	PXL_20230208_204105029	dng	3	3	1
FieldData\Smithsonian Pictures\Central VA (near Richmond)\Adult\497276	4	PXL_20230208_204118854.dng	461	PXL_20230208_204118854	dng	4	4	1
FieldData\Smithsonian Pictures\Central VA (near Richmond)\Adult\497276	5	PXL_20230208_204119611.dng	462	PXL_20230208_204119611	dng	5	5	1
FieldData\Smithsonian Pictures\Central VA (near Richmond)\Adult\497276	6	PXL_20230208_204129810.dng	463	PXL_20230208_204129810	dng	6	6	1
FieldData\Smithsonian Pictures\Central VA (near Richmond)\Adult\497276	7	PXL_20230208_204130902.dng	464	PXL_20230208_204130902	dng	7	7	1
FieldData\Smithsonian Pictures\Central VA (near Richmond)\Adult\497276	8	PXL_20230208_204142332.dng	465	PXL_20230208_204142332	dng	8	8	1
FieldData\Smithsonian Pictures\Central VA (near Richmond)\Adult\497276	9	PXL_20230208_204143649.dng	466	PXL_20230208_204143649	dng	9	9	1
FieldData\Smithsonian Pictures\Central VA (near Richmond)\Adult\497276	10	PXL_20230208_204155170.dng	467	PXL_20230208_204155170	dng	10	10	1
FieldData\Smithsonian Pictures\Central VA (near Richmond)\Adult\497276	11	PXL_20230208_204155871.dng	468	PXL_20230208_204155871	dng	11	11	1
FieldData\Smithsonian Pictures\Central VA (near Richmond)\Adult\497302	1	PXL_20230208_200729853.dng	469	PXL_20230208_200729853	dng	1	1	1
FieldData\Smithsonian Pictures\Central VA (near Richmond)\Adult\497302	2	PXL_20230208_200733425.dng	470	PXL_20230208_200733425	dng	2	2	1
FieldData\Smithsonian Pictures\Central VA (near Richmond)\Adult\497302	3	PXL_20230208_200736613.dng	471	PXL_20230208_200736613	dng	3	3	1
FieldData\Smithsonian Pictures\Central VA (near Richmond)\Adult\497302	4	PXL_20230208_200751709.dng	472	PXL_20230208_200751709	dng	4	4	1
FieldData\Smithsonian Pictures\Central VA (near Richmond)\Adult\497302	5	PXL_20230208_200752702.dng	473	PXL_20230208_200752702	dng	5	5	1
FieldData\Smithsonian Pictures\Central VA (near Richmond)\Adult\497302	6	PXL_20230208_200803659.dng	474	PXL_20230208_200803659	dng	6	6	1
FieldData\Smithsonian Pictures\Central VA (near Richmond)\Adult\497302	7	PXL_20230208_200804673.dng	475	PXL_20230208_200804673	dng	7	7	1
FieldData\Smithsonian Pictures\Central VA (near Richmond)\Adult\497302	8	PXL_20230208_200817408.dng	476	PXL_20230208_200817408	dng	8	8	1
FieldData\Smithsonian Pictures\Central VA (near Richmond)\Adult\497302	9	PXL_20230208_200818240.dng	477	PXL_20230208_200818240	dng	9	9	1
FieldData\Smithsonian Pictures\Central VA (near Richmond)\Adult\497302	10	PXL_20230208_200826898.dng	478	PXL_20230208_200826898	dng	10	10	1
FieldData\Smithsonian Pictures\Central VA (near Richmond)\Adult\497302	11	PXL_20230208_200828043.dng	479	PXL_20230208_200828043	dng	11	11	1
FieldData\Smithsonian Pictures\Central VA (near Richmond)\Adult\519611	1	PXL_20230210_190637094.dng	480	PXL_20230210_190637094	dng	1	1	1
FieldData\Smithsonian Pictures\Central VA (near Richmond)\Adult\519611	2	PXL_20230210_190640639.dng	481	PXL_20230210_190640639	dng	2	2	1
FieldData\Smithsonian Pictures\Central VA (near Richmond)\Adult\519611	3	PXL_20230210_190643152.dng	482	PXL_20230210_190643152	dng	3	3	1
FieldData\Smithsonian Pictures\Central VA (near Richmond)\Adult\519611	4	PXL_20230210_190655613.dng	483	PXL_20230210_190655613	dng	4	4	1
FieldData\Smithsonian Pictures\Central VA (near Richmond)\Adult\519611	5	PXL_20230210_190656263.dng	484	PXL_20230210_190656263	dng	5	5	1
FieldData\Smithsonian Pictures\Central VA (near Richmond)\Adult\519611	6	PXL_20230210_190726747.dng	485	PXL_20230210_190726747	dng	6	6	1
FieldData\Smithsonian Pictures\Central VA (near Richmond)\Adult\519611	7	PXL_20230210_190727570.dng	486	PXL_20230210_190727570	dng	7	7	1
FieldData\Smithsonian Pictures\Central VA (near Richmond)\Adult\519611	8	PXL_20230210_190748696.dng	487	PXL_20230210_190748696	dng	8	8	1
FieldData\Smithsonian Pictures\Central VA (near Richmond)\Adult\519611	9	PXL_20230210_190749441.dng	488	PXL_20230210_190749441	dng	9	9	1
FieldData\Smithsonian Pictures\Central VA (near Richmond)\Adult\519611	10	PXL_20230210_190756503.dng	489	PXL_20230210_190756503	dng	10	10	1
FieldData\Smithsonian Pictures\Central VA (near Richmond)\Adult\519611	11	PXL_20230210_190757457.dng	490	PXL_20230210_190757457	dng	11	11	1
FieldData\Smithsonian Pictures\Central VA (near Richmond)\Hatchling\22289	1	PXL_20230201_193501593.dng	491	PXL_20230201_193501593	dng	1	1	1
FieldData\Smithsonian Pictures\Central VA (near Richmond)\Hatchling\22289	2	PXL_20230201_193503451.dng	492	PXL_20230201_193503451	dng	2	2	1
FieldData\Smithsonian Pictures\Central VA (near Richmond)\Hatchling\22289	3	PXL_20230201_193519911.dng	493	PXL_20230201_193519911	dng	3	3	1
FieldData\Smithsonian Pictures\Central VA (near Richmond)\Hatchling\22289	4	PXL_20230201_193520530.dng	494	PXL_20230201_193520530	dng	4	4	1
FieldData\Smithsonian Pictures\Central VA (near Richmond)\Hatchling\22289	5	PXL_20230201_193536195.dng	495	PXL_20230201_193536195	dng	5	5	1
FieldData\Smithsonian Pictures\Central VA (near Richmond)\Hatchling\22289	6	PXL_20230201_193537003.dng	496	PXL_20230201_193537003	dng	6	6	1
FieldData\Smithsonian Pictures\Central VA (near Richmond)\Hatchling\22289	7	PXL_20230201_193548428.dng	497	PXL_20230201_193548428	dng	7	7	1
FieldData\Smithsonian Pictures\Central VA (near Richmond)\Hatchling\22289	8	PXL_20230201_193549122.dng	498	PXL_20230201_193549122	dng	8	8	1
FieldData\Smithsonian Pictures\Central VA (near Richmond)\Hatchling\22289	9	PXL_20230201_193607243.dng	499	PXL_20230201_193607243	dng	9	9	1
FieldData\Smithsonian Pictures\Central VA (near Richmond)\Hatchling\22289	10	PXL_20230201_193608347.dng	500	PXL_20230201_193608347	dng	10	10	1
FieldData\Smithsonian Pictures\Central VA (near Richmond)\Hatchling\519634	1	PXL_20230210_193254648.dng	501	PXL_20230210_193254648	dng	1	1	1
FieldData\Smithsonian Pictures\Central VA (near Richmond)\Hatchling\519634	2	PXL_20230210_193256903.dng	502	PXL_20230210_193256903	dng	2	2	1
FieldData\Smithsonian Pictures\Central VA (near Richmond)\Hatchling\519634	3	PXL_20230210_193258827.dng	503	PXL_20230210_193258827	dng	3	3	1
FieldData\Smithsonian Pictures\Central VA (near Richmond)\Hatchling\519634	4	PXL_20230210_193312091.dng	504	PXL_20230210_193312091	dng	4	4	1
FieldData\Smithsonian Pictures\Central VA (near Richmond)\Hatchling\519634	5	PXL_20230210_193312760.dng	505	PXL_20230210_193312760	dng	5	5	1
FieldData\Smithsonian Pictures\Central VA (near Richmond)\Hatchling\519634	6	PXL_20230210_193323708.dng	506	PXL_20230210_193323708	dng	6	6	1
FieldData\Smithsonian Pictures\Central VA (near Richmond)\Hatchling\519634	7	PXL_20230210_193324312.dng	507	PXL_20230210_193324312	dng	7	7	1
FieldData\Smithsonian Pictures\Central VA (near Richmond)\Hatchling\519634	8	PXL_20230210_193338859.dng	508	PXL_20230210_193338859	dng	8	8	1
FieldData\Smithsonian Pictures\Central VA (near Richmond)\Hatchling\519634	9	PXL_20230210_193339874.dng	509	PXL_20230210_193339874	dng	9	9	1
FieldData\Smithsonian Pictures\Central VA (near Richmond)\Hatchling\519634	10	PXL_20230210_193353449.dng	510	PXL_20230210_193353449	dng	10	10	1
FieldData\Smithsonian Pictures\Central VA (near Richmond)\Hatchling\519634	11	PXL_20230210_193354646.dng	511	PXL_20230210_193354646	dng	11	11	1
FieldData\Smithsonian Pictures\Central VA (near Richmond)\Hatchling\519667	1	PXL_20230210_203557212.dng	512	PXL_20230210_203557212	dng	1	1	1
FieldData\Smithsonian Pictures\Central VA (near Richmond)\Hatchling\519667	2	PXL_20230210_203600027.dng	513	PXL_20230210_203600027	dng	2	2	1
FieldData\Smithsonian Pictures\Central VA (near Richmond)\Hatchling\519667	3	PXL_20230210_203602295.dng	514	PXL_20230210_203602295	dng	3	3	1
FieldData\Smithsonian Pictures\Central VA (near Richmond)\Hatchling\519667	4	PXL_20230210_203618317.dng	515	PXL_20230210_203618317	dng	4	4	1
FieldData\Smithsonian Pictures\Central VA (near Richmond)\Hatchling\519667	5	PXL_20230210_203619171.dng	516	PXL_20230210_203619171	dng	5	5	1
FieldData\Smithsonian Pictures\Central VA (near Richmond)\Hatchling\519667	6	PXL_20230210_203626163.dng	517	PXL_20230210_203626163	dng	6	6	1
FieldData\Smithsonian Pictures\Central VA (near Richmond)\Hatchling\519667	7	PXL_20230210_203626925.dng	518	PXL_20230210_203626925	dng	7	7	1
FieldData\Smithsonian Pictures\Central VA (near Richmond)\Hatchling\519667	8	PXL_20230210_203638267.dng	519	PXL_20230210_203638267	dng	8	8	1
FieldData\Smithsonian Pictures\Central VA (near Richmond)\Hatchling\519667	9	PXL_20230210_203638859.dng	520	PXL_20230210_203638859	dng	9	9	1
FieldData\Smithsonian Pictures\Central VA (near Richmond)\Hatchling\519667	10	PXL_20230210_203650415.dng	521	PXL_20230210_203650415	dng	10	10	1
FieldData\Smithsonian Pictures\Central VA (near Richmond)\Hatchling\519667	11	PXL_20230210_203656010.dng	522	PXL_20230210_203656010	dng	11	11	1
FieldData\Smithsonian Pictures\Central VA (near Richmond)\Hatchling\519668	1	PXL_20230210_204000807.dng	523	PXL_20230210_204000807	dng	1	1	1
FieldData\Smithsonian Pictures\Central VA (near Richmond)\Hatchling\519668	2	PXL_20230210_204003740.dng	524	PXL_20230210_204003740	dng	2	2	1
FieldData\Smithsonian Pictures\Central VA (near Richmond)\Hatchling\519668	3	PXL_20230210_204005866.dng	525	PXL_20230210_204005866	dng	3	3	1
FieldData\Smithsonian Pictures\Central VA (near Richmond)\Hatchling\519668	4	PXL_20230210_204033303.dng	526	PXL_20230210_204033303	dng	4	4	1
FieldData\Smithsonian Pictures\Central VA (near Richmond)\Hatchling\519668	5	PXL_20230210_204036091.dng	527	PXL_20230210_204036091	dng	5	5	1
FieldData\Smithsonian Pictures\Central VA (near Richmond)\Hatchling\519668	6	PXL_20230210_204046260.dng	528	PXL_20230210_204046260	dng	6	6	1
FieldData\Smithsonian Pictures\Central VA (near Richmond)\Hatchling\519668	7	PXL_20230210_204047513.dng	529	PXL_20230210_204047513	dng	7	7	1
FieldData\Smithsonian Pictures\Central VA (near Richmond)\Hatchling\519668	8	PXL_20230210_204102675.dng	530	PXL_20230210_204102675	dng	8	8	1
FieldData\Smithsonian Pictures\Central VA (near Richmond)\Hatchling\519668	9	PXL_20230210_204103706.dng	531	PXL_20230210_204103706	dng	9	9	1
FieldData\Smithsonian Pictures\Central VA (near Richmond)\Hatchling\519668	10	PXL_20230210_204119736.dng	532	PXL_20230210_204119736	dng	10	10	1
FieldData\Smithsonian Pictures\Central VA (near Richmond)\Hatchling\519668	11	PXL_20230210_204120858.dng	533	PXL_20230210_204120858	dng	11	11	1
FieldData\Smithsonian Pictures\Central VA (near Richmond)\Hatchling\519669	1	PXL_20230210_200701269.dng	534	PXL_20230210_200701269	dng	1	1	1
FieldData\Smithsonian Pictures\Central VA (near Richmond)\Hatchling\519669	2	PXL_20230210_200703902.dng	535	PXL_20230210_200703902	dng	2	2	1
FieldData\Smithsonian Pictures\Central VA (near Richmond)\Hatchling\519669	3	PXL_20230210_200706388.dng	536	PXL_20230210_200706388	dng	3	3	1
FieldData\Smithsonian Pictures\Central VA (near Richmond)\Hatchling\519669	4	PXL_20230210_200724866.dng	537	PXL_20230210_200724866	dng	4	4	1
FieldData\Smithsonian Pictures\Central VA (near Richmond)\Hatchling\519669	5	PXL_20230210_200726100.dng	538	PXL_20230210_200726100	dng	5	5	1
FieldData\Smithsonian Pictures\Central VA (near Richmond)\Hatchling\519669	6	PXL_20230210_200738980.dng	539	PXL_20230210_200738980	dng	6	6	1
FieldData\Smithsonian Pictures\Central VA (near Richmond)\Hatchling\519669	7	PXL_20230210_200739753.dng	540	PXL_20230210_200739753	dng	7	7	1
FieldData\Smithsonian Pictures\Central VA (near Richmond)\Hatchling\519669	8	PXL_20230210_200752708.dng	541	PXL_20230210_200752708	dng	8	8	1
FieldData\Smithsonian Pictures\Central VA (near Richmond)\Hatchling\519669	9	PXL_20230210_200753349.dng	542	PXL_20230210_200753349	dng	9	9	1
FieldData\Smithsonian Pictures\Central VA (near Richmond)\Hatchling\519669	10	PXL_20230210_200806210.dng	543	PXL_20230210_200806210	dng	10	10	1
FieldData\Smithsonian Pictures\Central VA (near Richmond)\Hatchling\519669	11	PXL_20230210_200806817.dng	544	PXL_20230210_200806817	dng	11	11	1
FieldData\Smithsonian Pictures\Central VA (near Richmond)\Hatchling\519670	1	PXL_20230210_195935844.dng	545	PXL_20230210_195935844	dng	1	1	1
FieldData\Smithsonian Pictures\Central VA (near Richmond)\Hatchling\519670	2	PXL_20230210_195938000.dng	546	PXL_20230210_195938000	dng	2	2	1
FieldData\Smithsonian Pictures\Central VA (near Richmond)\Hatchling\519670	3	PXL_20230210_195939634.dng	547	PXL_20230210_195939634	dng	3	3	1
FieldData\Smithsonian Pictures\Central VA (near Richmond)\Hatchling\519670	4	PXL_20230210_200000016.dng	548	PXL_20230210_200000016	dng	4	4	1
FieldData\Smithsonian Pictures\Central VA (near Richmond)\Hatchling\519670	5	PXL_20230210_200000668.dng	549	PXL_20230210_200000668	dng	5	5	1
FieldData\Smithsonian Pictures\Central VA (near Richmond)\Hatchling\519670	6	PXL_20230210_200012115.dng	550	PXL_20230210_200012115	dng	6	6	1
FieldData\Smithsonian Pictures\Central VA (near Richmond)\Hatchling\519670	7	PXL_20230210_200013245.dng	551	PXL_20230210_200013245	dng	7	7	1
FieldData\Smithsonian Pictures\Central VA (near Richmond)\Hatchling\519670	8	PXL_20230210_200029383.dng	552	PXL_20230210_200029383	dng	8	8	1
FieldData\Smithsonian Pictures\Central VA (near Richmond)\Hatchling\519670	9	PXL_20230210_200030564.dng	553	PXL_20230210_200030564	dng	9	9	1
FieldData\Smithsonian Pictures\Central VA (near Richmond)\Hatchling\519670	10	PXL_20230210_200038570.dng	554	PXL_20230210_200038570	dng	10	10	1
FieldData\Smithsonian Pictures\Central VA (near Richmond)\Hatchling\519670	11	PXL_20230210_200039485.dng	555	PXL_20230210_200039485	dng	11	11	1
FieldData\Smithsonian Pictures\Central VA (near Richmond)\Hatchling\519671	1	PXL_20230210_211022931.dng	556	PXL_20230210_211022931	dng	1	1	1
FieldData\Smithsonian Pictures\Central VA (near Richmond)\Hatchling\519671	2	PXL_20230210_211025091.dng	557	PXL_20230210_211025091	dng	2	2	1
FieldData\Smithsonian Pictures\Central VA (near Richmond)\Hatchling\519671	3	PXL_20230210_211028380.dng	558	PXL_20230210_211028380	dng	3	3	1
FieldData\Smithsonian Pictures\Central VA (near Richmond)\Hatchling\519671	4	PXL_20230210_211047223.dng	559	PXL_20230210_211047223	dng	4	4	1
FieldData\Smithsonian Pictures\Central VA (near Richmond)\Hatchling\519671	5	PXL_20230210_211047904.dng	560	PXL_20230210_211047904	dng	5	5	1
FieldData\Smithsonian Pictures\Central VA (near Richmond)\Hatchling\519671	6	PXL_20230210_211056687.dng	561	PXL_20230210_211056687	dng	6	6	1
FieldData\Smithsonian Pictures\Central VA (near Richmond)\Hatchling\519671	7	PXL_20230210_211057504.dng	562	PXL_20230210_211057504	dng	7	7	1
FieldData\Smithsonian Pictures\Central VA (near Richmond)\Hatchling\519671	8	PXL_20230210_211111974.dng	563	PXL_20230210_211111974	dng	8	8	1
FieldData\Smithsonian Pictures\Central VA (near Richmond)\Hatchling\519671	9	PXL_20230210_211112587.dng	564	PXL_20230210_211112587	dng	9	9	1
FieldData\Smithsonian Pictures\Central VA (near Richmond)\Hatchling\519671	10	PXL_20230210_211126873.dng	565	PXL_20230210_211126873	dng	10	10	1
FieldData\Smithsonian Pictures\Central VA (near Richmond)\Hatchling\519671	11	PXL_20230210_211128319.dng	566	PXL_20230210_211128319	dng	11	11	1
FieldData\Smithsonian Pictures\Central VA (near Richmond)\Juvenile\519618	1	PXL_20230210_185653101.dng	567	PXL_20230210_185653101	dng	1	1	1
FieldData\Smithsonian Pictures\Central VA (near Richmond)\Juvenile\519618	2	PXL_20230210_185657343.dng	568	PXL_20230210_185657343	dng	2	2	1
FieldData\Smithsonian Pictures\Central VA (near Richmond)\Juvenile\519618	3	PXL_20230210_185659214.dng	569	PXL_20230210_185659214	dng	3	3	1
FieldData\Smithsonian Pictures\Central VA (near Richmond)\Juvenile\519618	4	PXL_20230210_185714119.dng	570	PXL_20230210_185714119	dng	4	4	1
FieldData\Smithsonian Pictures\Central VA (near Richmond)\Juvenile\519618	5	PXL_20230210_185714957.dng	571	PXL_20230210_185714957	dng	5	5	1
FieldData\Smithsonian Pictures\Central VA (near Richmond)\Juvenile\519618	6	PXL_20230210_185722819.dng	572	PXL_20230210_185722819	dng	6	6	1
FieldData\Smithsonian Pictures\Central VA (near Richmond)\Juvenile\519618	7	PXL_20230210_185723481.dng	573	PXL_20230210_185723481	dng	7	7	1
FieldData\Smithsonian Pictures\Central VA (near Richmond)\Juvenile\519618	8	PXL_20230210_185731610.dng	574	PXL_20230210_185731610	dng	8	8	1
FieldData\Smithsonian Pictures\Central VA (near Richmond)\Juvenile\519618	9	PXL_20230210_185732244.dng	575	PXL_20230210_185732244	dng	9	9	1
FieldData\Smithsonian Pictures\Central VA (near Richmond)\Juvenile\519618	10	PXL_20230210_185743815.dng	576	PXL_20230210_185743815	dng	10	10	1
FieldData\Smithsonian Pictures\Central VA (near Richmond)\Juvenile\519618	11	PXL_20230210_185747080.dng	577	PXL_20230210_185747080	dng	11	11	1
FieldData\Smithsonian Pictures\Central VA (near Richmond)\Juvenile\519622	1	PXL_20230210_190414148.dng	578	PXL_20230210_190414148	dng	1	1	1
FieldData\Smithsonian Pictures\Central VA (near Richmond)\Juvenile\519622	2	PXL_20230210_190417241.dng	579	PXL_20230210_190417241	dng	2	2	1
FieldData\Smithsonian Pictures\Central VA (near Richmond)\Juvenile\519622	3	PXL_20230210_190419520.dng	580	PXL_20230210_190419520	dng	3	3	1
FieldData\Smithsonian Pictures\Central VA (near Richmond)\Juvenile\519622	4	PXL_20230210_190430095.dng	581	PXL_20230210_190430095	dng	4	4	1
FieldData\Smithsonian Pictures\Central VA (near Richmond)\Juvenile\519622	5	PXL_20230210_190430982.dng	582	PXL_20230210_190430982	dng	5	5	1
FieldData\Smithsonian Pictures\Central VA (near Richmond)\Juvenile\519622	6	PXL_20230210_190436031.dng	583	PXL_20230210_190436031	dng	6	6	1
FieldData\Smithsonian Pictures\Central VA (near Richmond)\Juvenile\519622	7	PXL_20230210_190436842.dng	584	PXL_20230210_190436842	dng	7	7	1
FieldData\Smithsonian Pictures\Central VA (near Richmond)\Juvenile\519622	8	PXL_20230210_190442496.dng	585	PXL_20230210_190442496	dng	8	8	1
FieldData\Smithsonian Pictures\Central VA (near Richmond)\Juvenile\519622	9	PXL_20230210_190444040.dng	586	PXL_20230210_190444040	dng	9	9	1
FieldData\Smithsonian Pictures\Central VA (near Richmond)\Juvenile\519622	10	PXL_20230210_190455148.dng	587	PXL_20230210_190455148	dng	10	10	1
FieldData\Smithsonian Pictures\Central VA (near Richmond)\Juvenile\519622	11	PXL_20230210_190457851.dng	588	PXL_20230210_190457851	dng	11	11	1
FieldData\Smithsonian Pictures\NOVA-DC-MD\Adult\11600	1	PXL_20230125_145734169.dng	589	PXL_20230125_145734169	dng	1	1	1
FieldData\Smithsonian Pictures\NOVA-DC-MD\Adult\11600	2	PXL_20230125_145748054.dng	590	PXL_20230125_145748054	dng	2	2	1
FieldData\Smithsonian Pictures\NOVA-DC-MD\Adult\11600	3	PXL_20230125_145844768.dng	591	PXL_20230125_145844768	dng	3	3	1
FieldData\Smithsonian Pictures\NOVA-DC-MD\Adult\11600	4	PXL_20230125_145903990.dng	592	PXL_20230125_145903990	dng	4	4	1
FieldData\Smithsonian Pictures\NOVA-DC-MD\Adult\11600	5	PXL_20230125_145915828.dng	593	PXL_20230125_145915828	dng	5	5	1
FieldData\Smithsonian Pictures\NOVA-DC-MD\Adult\11600	6	PXL_20230125_145918363.dng	594	PXL_20230125_145918363	dng	6	6	1
FieldData\Smithsonian Pictures\NOVA-DC-MD\Adult\11600	7	PXL_20230125_145929335.dng	595	PXL_20230125_145929335	dng	7	7	1
FieldData\Smithsonian Pictures\NOVA-DC-MD\Adult\11600	8	PXL_20230125_145932200.dng	596	PXL_20230125_145932200	dng	8	8	1
FieldData\Smithsonian Pictures\NOVA-DC-MD\Adult\11600	9	PXL_20230125_145940313.dng	597	PXL_20230125_145940313	dng	9	9	1
FieldData\Smithsonian Pictures\NOVA-DC-MD\Adult\11600	10	PXL_20230125_145941234.dng	598	PXL_20230125_145941234	dng	10	10	1
FieldData\Smithsonian Pictures\NOVA-DC-MD\Adult\139661	1	PXL_20230131_194831549.dng	599	PXL_20230131_194831549	dng	1	1	1
FieldData\Smithsonian Pictures\NOVA-DC-MD\Adult\139661	2	PXL_20230131_194836015.dng	600	PXL_20230131_194836015	dng	2	2	1
FieldData\Smithsonian Pictures\NOVA-DC-MD\Adult\139661	3	PXL_20230131_194840433.dng	601	PXL_20230131_194840433	dng	3	3	1
FieldData\Smithsonian Pictures\NOVA-DC-MD\Adult\139661	4	PXL_20230131_194852442.dng	602	PXL_20230131_194852442	dng	4	4	1
FieldData\Smithsonian Pictures\NOVA-DC-MD\Adult\139661	5	PXL_20230131_194853632.dng	603	PXL_20230131_194853632	dng	5	5	1
FieldData\Smithsonian Pictures\NOVA-DC-MD\Adult\139661	6	PXL_20230131_194901761.dng	604	PXL_20230131_194901761	dng	6	6	1
FieldData\Smithsonian Pictures\NOVA-DC-MD\Adult\139661	7	PXL_20230131_194902520.dng	605	PXL_20230131_194902520	dng	7	7	1
FieldData\Smithsonian Pictures\NOVA-DC-MD\Adult\139661	8	PXL_20230131_194909500.dng	606	PXL_20230131_194909500	dng	8	8	1
FieldData\Smithsonian Pictures\NOVA-DC-MD\Adult\139661	9	PXL_20230131_194910235.dng	607	PXL_20230131_194910235	dng	9	9	1
FieldData\Smithsonian Pictures\NOVA-DC-MD\Adult\139661	10	PXL_20230131_194917408.dng	608	PXL_20230131_194917408	dng	10	10	1
FieldData\Smithsonian Pictures\NOVA-DC-MD\Adult\139661	11	PXL_20230131_194918018.dng	609	PXL_20230131_194918018	dng	11	11	1
FieldData\Smithsonian Pictures\NOVA-DC-MD\Adult\141485	1	PXL_20230131_195525225.dng	610	PXL_20230131_195525225	dng	1	1	1
FieldData\Smithsonian Pictures\NOVA-DC-MD\Adult\141485	2	PXL_20230131_195528402.dng	611	PXL_20230131_195528402	dng	2	2	1
FieldData\Smithsonian Pictures\NOVA-DC-MD\Adult\141485	3	PXL_20230131_195545055.dng	612	PXL_20230131_195545055	dng	3	3	1
FieldData\Smithsonian Pictures\NOVA-DC-MD\Adult\141485	4	PXL_20230131_195545938.dng	613	PXL_20230131_195545938	dng	4	4	1
FieldData\Smithsonian Pictures\NOVA-DC-MD\Adult\141485	5	PXL_20230131_195555448.dng	614	PXL_20230131_195555448	dng	5	5	1
FieldData\Smithsonian Pictures\NOVA-DC-MD\Adult\141485	6	PXL_20230131_195556107.dng	615	PXL_20230131_195556107	dng	6	6	1
FieldData\Smithsonian Pictures\NOVA-DC-MD\Adult\141485	7	PXL_20230131_195603148.dng	616	PXL_20230131_195603148	dng	7	7	1
FieldData\Smithsonian Pictures\NOVA-DC-MD\Adult\141485	8	PXL_20230131_195603832.dng	617	PXL_20230131_195603832	dng	8	8	1
FieldData\Smithsonian Pictures\NOVA-DC-MD\Adult\141485	9	PXL_20230131_195615489.dng	618	PXL_20230131_195615489	dng	9	9	1
FieldData\Smithsonian Pictures\NOVA-DC-MD\Adult\141485	10	PXL_20230131_195616142.dng	619	PXL_20230131_195616142	dng	10	10	1
FieldData\Smithsonian Pictures\NOVA-DC-MD\Adult\17923	1	PXL_20230201_191633332.dng	620	PXL_20230201_191633332	dng	1	1	1
FieldData\Smithsonian Pictures\NOVA-DC-MD\Adult\17923	2	PXL_20230201_191636394.dng	621	PXL_20230201_191636394	dng	2	2	1
FieldData\Smithsonian Pictures\NOVA-DC-MD\Adult\17923	3	PXL_20230201_191648406.dng	622	PXL_20230201_191648406	dng	3	3	1
FieldData\Smithsonian Pictures\NOVA-DC-MD\Adult\17923	4	PXL_20230201_191649069.dng	623	PXL_20230201_191649069	dng	4	4	1
FieldData\Smithsonian Pictures\NOVA-DC-MD\Adult\17923	5	PXL_20230201_191657051.dng	624	PXL_20230201_191657051	dng	5	5	1
FieldData\Smithsonian Pictures\NOVA-DC-MD\Adult\17923	6	PXL_20230201_191657679.dng	625	PXL_20230201_191657679	dng	6	6	1
FieldData\Smithsonian Pictures\NOVA-DC-MD\Adult\17923	7	PXL_20230201_191705497.dng	626	PXL_20230201_191705497	dng	7	7	1
FieldData\Smithsonian Pictures\NOVA-DC-MD\Adult\17923	8	PXL_20230201_191706662.dng	627	PXL_20230201_191706662	dng	8	8	1
FieldData\Smithsonian Pictures\NOVA-DC-MD\Adult\17923	9	PXL_20230201_191712717.dng	628	PXL_20230201_191712717	dng	9	9	1
FieldData\Smithsonian Pictures\NOVA-DC-MD\Adult\17923	10	PXL_20230201_191715412.dng	629	PXL_20230201_191715412	dng	10	10	1
FieldData\Smithsonian Pictures\NOVA-DC-MD\Adult\203066	1	PXL_20230207_155958563.dng	630	PXL_20230207_155958563	dng	1	1	1
FieldData\Smithsonian Pictures\NOVA-DC-MD\Adult\203066	2	PXL_20230207_160004674.dng	631	PXL_20230207_160004674	dng	2	2	1
FieldData\Smithsonian Pictures\NOVA-DC-MD\Adult\203066	3	PXL_20230207_160008592.dng	632	PXL_20230207_160008592	dng	3	3	1
FieldData\Smithsonian Pictures\NOVA-DC-MD\Adult\203066	4	PXL_20230207_160020191.dng	633	PXL_20230207_160020191	dng	4	4	1
FieldData\Smithsonian Pictures\NOVA-DC-MD\Adult\203066	5	PXL_20230207_160020846.dng	634	PXL_20230207_160020846	dng	5	5	1
FieldData\Smithsonian Pictures\NOVA-DC-MD\Adult\203066	6	PXL_20230207_160033061.dng	635	PXL_20230207_160033061	dng	6	6	1
FieldData\Smithsonian Pictures\NOVA-DC-MD\Adult\203066	7	PXL_20230207_160034186.dng	636	PXL_20230207_160034186	dng	7	7	1
FieldData\Smithsonian Pictures\NOVA-DC-MD\Adult\203066	8	PXL_20230207_160042283.dng	637	PXL_20230207_160042283	dng	8	8	1
FieldData\Smithsonian Pictures\NOVA-DC-MD\Adult\203066	9	PXL_20230207_160043729.dng	638	PXL_20230207_160043729	dng	9	9	1
FieldData\Smithsonian Pictures\NOVA-DC-MD\Adult\203066	10	PXL_20230207_160053365.dng	639	PXL_20230207_160053365	dng	10	10	1
FieldData\Smithsonian Pictures\NOVA-DC-MD\Adult\203066	11	PXL_20230207_160055946.dng	640	PXL_20230207_160055946	dng	11	11	1
FieldData\Smithsonian Pictures\NOVA-DC-MD\Adult\203309	1	PXL_20230207_155135889.dng	641	PXL_20230207_155135889	dng	1	1	1
FieldData\Smithsonian Pictures\NOVA-DC-MD\Adult\203309	2	PXL_20230207_155139580.dng	642	PXL_20230207_155139580	dng	2	2	1
FieldData\Smithsonian Pictures\NOVA-DC-MD\Adult\203309	3	PXL_20230207_155144415.dng	643	PXL_20230207_155144415	dng	3	3	1
FieldData\Smithsonian Pictures\NOVA-DC-MD\Adult\203309	4	PXL_20230207_155155297.dng	644	PXL_20230207_155155297	dng	4	4	1
FieldData\Smithsonian Pictures\NOVA-DC-MD\Adult\203309	5	PXL_20230207_155157412.dng	645	PXL_20230207_155157412	dng	5	5	1
FieldData\Smithsonian Pictures\NOVA-DC-MD\Adult\203309	6	PXL_20230207_155204666.dng	646	PXL_20230207_155204666	dng	6	6	1
FieldData\Smithsonian Pictures\NOVA-DC-MD\Adult\203309	7	PXL_20230207_155206327.dng	647	PXL_20230207_155206327	dng	7	7	1
FieldData\Smithsonian Pictures\NOVA-DC-MD\Adult\203309	8	PXL_20230207_155215944.dng	648	PXL_20230207_155215944	dng	8	8	1
FieldData\Smithsonian Pictures\NOVA-DC-MD\Adult\203309	9	PXL_20230207_155216627.dng	649	PXL_20230207_155216627	dng	9	9	1
FieldData\Smithsonian Pictures\NOVA-DC-MD\Adult\203309	10	PXL_20230207_155225831.dng	650	PXL_20230207_155225831	dng	10	10	1
FieldData\Smithsonian Pictures\NOVA-DC-MD\Adult\203309	11	PXL_20230207_155226499.dng	651	PXL_20230207_155226499	dng	11	11	1
FieldData\Smithsonian Pictures\NOVA-DC-MD\Adult\20544	1	PXL_20230207_170646891.dng	652	PXL_20230207_170646891	dng	1	1	1
FieldData\Smithsonian Pictures\NOVA-DC-MD\Adult\20544	2	PXL_20230207_170650069.dng	653	PXL_20230207_170650069	dng	2	2	1
FieldData\Smithsonian Pictures\NOVA-DC-MD\Adult\20544	3	PXL_20230207_170652107.dng	654	PXL_20230207_170652107	dng	3	3	1
FieldData\Smithsonian Pictures\NOVA-DC-MD\Adult\20544	4	PXL_20230207_170704971.dng	655	PXL_20230207_170704971	dng	4	4	1
FieldData\Smithsonian Pictures\NOVA-DC-MD\Adult\20544	5	PXL_20230207_170706028.dng	656	PXL_20230207_170706028	dng	5	5	1
FieldData\Smithsonian Pictures\NOVA-DC-MD\Adult\20544	6	PXL_20230207_170715066.dng	657	PXL_20230207_170715066	dng	6	6	1
FieldData\Smithsonian Pictures\NOVA-DC-MD\Adult\20544	7	PXL_20230207_170715905.dng	658	PXL_20230207_170715905	dng	7	7	1
FieldData\Smithsonian Pictures\NOVA-DC-MD\Adult\20544	8	PXL_20230207_170724858.dng	659	PXL_20230207_170724858	dng	8	8	1
FieldData\Smithsonian Pictures\NOVA-DC-MD\Adult\20544	9	PXL_20230207_170728113.dng	660	PXL_20230207_170728113	dng	9	9	1
FieldData\Smithsonian Pictures\NOVA-DC-MD\Adult\20544	10	PXL_20230207_170737424.dng	661	PXL_20230207_170737424	dng	10	10	1
FieldData\Smithsonian Pictures\NOVA-DC-MD\Adult\20544	11	PXL_20230207_170739753.dng	662	PXL_20230207_170739753	dng	11	11	1
FieldData\Smithsonian Pictures\NOVA-DC-MD\Adult\22468	1	PXL_20230201_200132761.dng	663	PXL_20230201_200132761	dng	1	1	1
FieldData\Smithsonian Pictures\NOVA-DC-MD\Adult\22468	2	PXL_20230201_200134427.dng	664	PXL_20230201_200134427	dng	2	2	1
FieldData\Smithsonian Pictures\NOVA-DC-MD\Adult\22468	3	PXL_20230201_200145538.dng	665	PXL_20230201_200145538	dng	3	3	1
FieldData\Smithsonian Pictures\NOVA-DC-MD\Adult\22468	4	PXL_20230201_200146213.dng	666	PXL_20230201_200146213	dng	4	4	1
FieldData\Smithsonian Pictures\NOVA-DC-MD\Adult\22468	5	PXL_20230201_200153144.dng	667	PXL_20230201_200153144	dng	5	5	1
FieldData\Smithsonian Pictures\NOVA-DC-MD\Adult\22468	6	PXL_20230201_200153732.dng	668	PXL_20230201_200153732	dng	6	6	1
FieldData\Smithsonian Pictures\NOVA-DC-MD\Adult\22468	7	PXL_20230201_200203265.dng	669	PXL_20230201_200203265	dng	7	7	1
FieldData\Smithsonian Pictures\NOVA-DC-MD\Adult\22468	8	PXL_20230201_200203816.dng	670	PXL_20230201_200203816	dng	8	8	1
FieldData\Smithsonian Pictures\NOVA-DC-MD\Adult\22468	9	PXL_20230201_200215613.dng	671	PXL_20230201_200215613	dng	9	9	1
FieldData\Smithsonian Pictures\NOVA-DC-MD\Adult\22468	10	PXL_20230201_200216603.dng	672	PXL_20230201_200216603	dng	10	10	1
FieldData\Smithsonian Pictures\NOVA-DC-MD\Adult\22608	1	PXL_20230125_162835581.dng	673	PXL_20230125_162835581	dng	4	1	0
FieldData\Smithsonian Pictures\NOVA-DC-MD\Adult\22608	2	PXL_20230125_162838128.dng	674	PXL_20230125_162838128	dng	5	2	0
FieldData\Smithsonian Pictures\NOVA-DC-MD\Adult\22608	3	PXL_20230125_162854703.dng	675	PXL_20230125_162854703	dng	6	3	0
FieldData\Smithsonian Pictures\NOVA-DC-MD\Adult\22608	4	PXL_20230125_162855769.dng	676	PXL_20230125_162855769	dng	7	4	0
FieldData\Smithsonian Pictures\NOVA-DC-MD\Adult\22608	5	PXL_20230125_162915541.dng	677	PXL_20230125_162915541	dng	8	5	0
FieldData\Smithsonian Pictures\NOVA-DC-MD\Adult\22608	6	PXL_20230125_162916344.dng	678	PXL_20230125_162916344	dng	9	6	0
FieldData\Smithsonian Pictures\NOVA-DC-MD\Adult\22608	7	PXL_20230125_162929914.dng	679	PXL_20230125_162929914	dng	10	7	0
FieldData\Smithsonian Pictures\NOVA-DC-MD\Adult\22608	8	PXL_20230125_162930881.dng	680	PXL_20230125_162930881	dng	11	8	0
FieldData\Smithsonian Pictures\NOVA-DC-MD\Adult\22608	9	aPXL_20230214_191709392.dng	681	aPXL_20230214_191709392	dng	1	9	0
FieldData\Smithsonian Pictures\NOVA-DC-MD\Adult\22608	10	aPXL_20230214_191711167.dng	682	aPXL_20230214_191711167	dng	2	10	0
FieldData\Smithsonian Pictures\NOVA-DC-MD\Adult\22608	11	aPXL_20230214_191712829.dng	683	aPXL_20230214_191712829	dng	3	11	0
FieldData\Smithsonian Pictures\NOVA-DC-MD\Adult\22609	1	PXL_20230125_163444490.dng	684	PXL_20230125_163444490	dng	1	1	1
FieldData\Smithsonian Pictures\NOVA-DC-MD\Adult\22609	2	PXL_20230125_163446244.dng	685	PXL_20230125_163446244	dng	2	2	1
FieldData\Smithsonian Pictures\NOVA-DC-MD\Adult\22609	3	PXL_20230125_163504615.dng	686	PXL_20230125_163504615	dng	3	3	1
FieldData\Smithsonian Pictures\NOVA-DC-MD\Adult\22609	4	PXL_20230125_163505777.dng	687	PXL_20230125_163505777	dng	4	4	1
FieldData\Smithsonian Pictures\NOVA-DC-MD\Adult\22609	5	PXL_20230125_163517457.dng	688	PXL_20230125_163517457	dng	5	5	1
FieldData\Smithsonian Pictures\NOVA-DC-MD\Adult\22609	6	PXL_20230125_163518407.dng	689	PXL_20230125_163518407	dng	6	6	1
FieldData\Smithsonian Pictures\NOVA-DC-MD\Adult\22609	7	PXL_20230125_163529458.dng	690	PXL_20230125_163529458	dng	7	7	1
FieldData\Smithsonian Pictures\NOVA-DC-MD\Adult\22609	8	PXL_20230125_163530221.dng	691	PXL_20230125_163530221	dng	8	8	1
FieldData\Smithsonian Pictures\NOVA-DC-MD\Adult\22609	9	PXL_20230125_163542841.dng	692	PXL_20230125_163542841	dng	9	9	1
FieldData\Smithsonian Pictures\NOVA-DC-MD\Adult\22609	10	PXL_20230125_163543772.dng	693	PXL_20230125_163543772	dng	10	10	1
FieldData\Smithsonian Pictures\NOVA-DC-MD\Adult\22610	1	PXL_20230125_162353337.dng	694	PXL_20230125_162353337	dng	4	1	0
FieldData\Smithsonian Pictures\NOVA-DC-MD\Adult\22610	2	PXL_20230125_162354380.dng	695	PXL_20230125_162354380	dng	5	2	0
FieldData\Smithsonian Pictures\NOVA-DC-MD\Adult\22610	3	PXL_20230125_162405824.dng	696	PXL_20230125_162405824	dng	6	3	0
FieldData\Smithsonian Pictures\NOVA-DC-MD\Adult\22610	4	PXL_20230125_162406652.dng	697	PXL_20230125_162406652	dng	7	4	0
FieldData\Smithsonian Pictures\NOVA-DC-MD\Adult\22610	5	PXL_20230125_162418393.dng	698	PXL_20230125_162418393	dng	8	5	0
FieldData\Smithsonian Pictures\NOVA-DC-MD\Adult\22610	6	PXL_20230125_162419107.dng	699	PXL_20230125_162419107	dng	9	6	0
FieldData\Smithsonian Pictures\NOVA-DC-MD\Adult\22610	7	PXL_20230125_162433969.dng	700	PXL_20230125_162433969	dng	10	7	0
FieldData\Smithsonian Pictures\NOVA-DC-MD\Adult\22610	8	PXL_20230125_162435528.dng	701	PXL_20230125_162435528	dng	11	8	0
FieldData\Smithsonian Pictures\NOVA-DC-MD\Adult\22610	9	aPXL_20230214_192649999.dng	702	aPXL_20230214_192649999	dng	1	9	0
FieldData\Smithsonian Pictures\NOVA-DC-MD\Adult\22610	10	aPXL_20230214_192651414.dng	703	aPXL_20230214_192651414	dng	2	10	0
FieldData\Smithsonian Pictures\NOVA-DC-MD\Adult\22610	11	aPXL_20230214_192652276.dng	704	aPXL_20230214_192652276	dng	3	11	0
FieldData\Smithsonian Pictures\NOVA-DC-MD\Adult\22611	1	PXL_20230125_164630374.dng	705	PXL_20230125_164630374	dng	1	1	1
FieldData\Smithsonian Pictures\NOVA-DC-MD\Adult\22611	2	PXL_20230125_164632537.dng	706	PXL_20230125_164632537	dng	2	2	1
FieldData\Smithsonian Pictures\NOVA-DC-MD\Adult\22611	3	PXL_20230125_164704346.dng	707	PXL_20230125_164704346	dng	3	3	1
FieldData\Smithsonian Pictures\NOVA-DC-MD\Adult\22611	4	PXL_20230125_164705235.dng	708	PXL_20230125_164705235	dng	4	4	1
FieldData\Smithsonian Pictures\NOVA-DC-MD\Adult\22611	5	PXL_20230125_164715577.dng	709	PXL_20230125_164715577	dng	5	5	1
FieldData\Smithsonian Pictures\NOVA-DC-MD\Adult\22611	6	PXL_20230125_164716310.dng	710	PXL_20230125_164716310	dng	6	6	1
FieldData\Smithsonian Pictures\NOVA-DC-MD\Adult\22611	7	PXL_20230125_164727927.dng	711	PXL_20230125_164727927	dng	7	7	1
FieldData\Smithsonian Pictures\NOVA-DC-MD\Adult\22611	8	PXL_20230125_164732400.dng	712	PXL_20230125_164732400	dng	8	8	1
FieldData\Smithsonian Pictures\NOVA-DC-MD\Adult\22611	9	PXL_20230125_164742071.dng	713	PXL_20230125_164742071	dng	9	9	1
FieldData\Smithsonian Pictures\NOVA-DC-MD\Adult\22611	10	PXL_20230125_164742967.dng	714	PXL_20230125_164742967	dng	10	10	1
FieldData\Smithsonian Pictures\NOVA-DC-MD\Adult\22612	1	PXL_20230125_165201336.dng	715	PXL_20230125_165201336	dng	4	1	0
FieldData\Smithsonian Pictures\NOVA-DC-MD\Adult\22612	2	PXL_20230125_165202264.dng	716	PXL_20230125_165202264	dng	5	2	0
FieldData\Smithsonian Pictures\NOVA-DC-MD\Adult\22612	3	PXL_20230125_165215038.dng	717	PXL_20230125_165215038	dng	6	3	0
FieldData\Smithsonian Pictures\NOVA-DC-MD\Adult\22612	4	PXL_20230125_165215734.dng	718	PXL_20230125_165215734	dng	7	4	0
FieldData\Smithsonian Pictures\NOVA-DC-MD\Adult\22612	5	PXL_20230125_165225652.dng	719	PXL_20230125_165225652	dng	8	5	0
FieldData\Smithsonian Pictures\NOVA-DC-MD\Adult\22612	6	PXL_20230125_165226786.dng	720	PXL_20230125_165226786	dng	9	6	0
FieldData\Smithsonian Pictures\NOVA-DC-MD\Adult\22612	7	PXL_20230125_165239682.dng	721	PXL_20230125_165239682	dng	10	7	0
FieldData\Smithsonian Pictures\NOVA-DC-MD\Adult\22612	8	PXL_20230125_165240958.dng	722	PXL_20230125_165240958	dng	11	8	0
FieldData\Smithsonian Pictures\NOVA-DC-MD\Adult\22612	9	aPXL_20230214_193140735.dng	723	aPXL_20230214_193140735	dng	1	9	0
FieldData\Smithsonian Pictures\NOVA-DC-MD\Adult\22612	10	aPXL_20230214_193144264.dng	724	aPXL_20230214_193144264	dng	2	10	0
FieldData\Smithsonian Pictures\NOVA-DC-MD\Adult\22612	11	aPXL_20230214_193145412.dng	725	aPXL_20230214_193145412	dng	3	11	0
FieldData\Smithsonian Pictures\NOVA-DC-MD\Adult\22613	1	PXL_20230125_164939067.dng	726	PXL_20230125_164939067	dng	4	1	0
FieldData\Smithsonian Pictures\NOVA-DC-MD\Adult\22613	2	PXL_20230125_164940151.dng	727	PXL_20230125_164940151	dng	5	2	0
FieldData\Smithsonian Pictures\NOVA-DC-MD\Adult\22613	3	PXL_20230125_164951451.dng	728	PXL_20230125_164951451	dng	6	3	0
FieldData\Smithsonian Pictures\NOVA-DC-MD\Adult\22613	4	PXL_20230125_164952250.dng	729	PXL_20230125_164952250	dng	7	4	0
FieldData\Smithsonian Pictures\NOVA-DC-MD\Adult\22613	5	PXL_20230125_165007700.dng	730	PXL_20230125_165007700	dng	8	5	0
FieldData\Smithsonian Pictures\NOVA-DC-MD\Adult\22613	6	PXL_20230125_165009173.dng	731	PXL_20230125_165009173	dng	9	6	0
FieldData\Smithsonian Pictures\NOVA-DC-MD\Adult\22613	7	PXL_20230125_165019653.dng	732	PXL_20230125_165019653	dng	10	7	0
FieldData\Smithsonian Pictures\NOVA-DC-MD\Adult\22613	8	PXL_20230125_165020610.dng	733	PXL_20230125_165020610	dng	11	8	0
FieldData\Smithsonian Pictures\NOVA-DC-MD\Adult\22613	9	aPXL_20230214_193621085.dng	734	aPXL_20230214_193621085	dng	1	9	0
FieldData\Smithsonian Pictures\NOVA-DC-MD\Adult\22613	10	aPXL_20230214_193623989.dng	735	aPXL_20230214_193623989	dng	2	10	0
FieldData\Smithsonian Pictures\NOVA-DC-MD\Adult\22613	11	aPXL_20230214_193626451.dng	736	aPXL_20230214_193626451	dng	3	11	0
FieldData\Smithsonian Pictures\NOVA-DC-MD\Adult\22614	1	PXL_20230125_164103073.dng	737	PXL_20230125_164103073	dng	1	1	1
FieldData\Smithsonian Pictures\NOVA-DC-MD\Adult\22614	2	PXL_20230125_164104736.dng	738	PXL_20230125_164104736	dng	2	2	1
FieldData\Smithsonian Pictures\NOVA-DC-MD\Adult\22614	3	PXL_20230125_164157631.dng	739	PXL_20230125_164157631	dng	3	3	1
FieldData\Smithsonian Pictures\NOVA-DC-MD\Adult\22614	4	PXL_20230125_164159122.dng	740	PXL_20230125_164159122	dng	4	4	1
FieldData\Smithsonian Pictures\NOVA-DC-MD\Adult\22614	5	PXL_20230125_164224346.dng	741	PXL_20230125_164224346	dng	5	5	1
FieldData\Smithsonian Pictures\NOVA-DC-MD\Adult\22614	6	PXL_20230125_164225370.dng	742	PXL_20230125_164225370	dng	6	6	1
FieldData\Smithsonian Pictures\NOVA-DC-MD\Adult\22614	7	PXL_20230125_164246637.dng	743	PXL_20230125_164246637	dng	7	7	1
FieldData\Smithsonian Pictures\NOVA-DC-MD\Adult\22614	8	PXL_20230125_164251386.dng	744	PXL_20230125_164251386	dng	8	8	1
FieldData\Smithsonian Pictures\NOVA-DC-MD\Adult\22614	9	PXL_20230125_164306352.dng	745	PXL_20230125_164306352	dng	9	9	1
FieldData\Smithsonian Pictures\NOVA-DC-MD\Adult\22614	10	PXL_20230125_164307450.dng	746	PXL_20230125_164307450	dng	10	10	1
FieldData\Smithsonian Pictures\NOVA-DC-MD\Adult\22616	1	PXL_20230201_203455695.dng	747	PXL_20230201_203455695	dng	1	1	1
FieldData\Smithsonian Pictures\NOVA-DC-MD\Adult\22616	2	PXL_20230201_203458799.dng	748	PXL_20230201_203458799	dng	2	2	1
FieldData\Smithsonian Pictures\NOVA-DC-MD\Adult\22616	3	PXL_20230201_203514532.dng	749	PXL_20230201_203514532	dng	3	3	1
FieldData\Smithsonian Pictures\NOVA-DC-MD\Adult\22616	4	PXL_20230201_203515347.dng	750	PXL_20230201_203515347	dng	4	4	1
FieldData\Smithsonian Pictures\NOVA-DC-MD\Adult\22616	5	PXL_20230201_203523371.dng	751	PXL_20230201_203523371	dng	5	5	1
FieldData\Smithsonian Pictures\NOVA-DC-MD\Adult\22616	6	PXL_20230201_203523986.dng	752	PXL_20230201_203523986	dng	6	6	1
FieldData\Smithsonian Pictures\NOVA-DC-MD\Adult\22616	7	PXL_20230201_203534234.dng	753	PXL_20230201_203534234	dng	7	7	1
FieldData\Smithsonian Pictures\NOVA-DC-MD\Adult\22616	8	PXL_20230201_203534919.dng	754	PXL_20230201_203534919	dng	8	8	1
FieldData\Smithsonian Pictures\NOVA-DC-MD\Adult\22616	9	PXL_20230201_203545069.dng	755	PXL_20230201_203545069	dng	9	9	1
FieldData\Smithsonian Pictures\NOVA-DC-MD\Adult\22616	10	PXL_20230201_203545788.dng	756	PXL_20230201_203545788	dng	10	10	1
FieldData\Smithsonian Pictures\NOVA-DC-MD\Adult\22618	1	PXL_20230201_201751630.dng	757	PXL_20230201_201751630	dng	1	1	1
FieldData\Smithsonian Pictures\NOVA-DC-MD\Adult\22618	2	PXL_20230201_201753061.dng	758	PXL_20230201_201753061	dng	2	2	1
FieldData\Smithsonian Pictures\NOVA-DC-MD\Adult\22618	3	PXL_20230201_201804618.dng	759	PXL_20230201_201804618	dng	3	3	1
FieldData\Smithsonian Pictures\NOVA-DC-MD\Adult\22618	4	PXL_20230201_201805300.dng	760	PXL_20230201_201805300	dng	4	4	1
FieldData\Smithsonian Pictures\NOVA-DC-MD\Adult\22618	5	PXL_20230201_201812560.dng	761	PXL_20230201_201812560	dng	5	5	1
FieldData\Smithsonian Pictures\NOVA-DC-MD\Adult\22618	6	PXL_20230201_201813466.dng	762	PXL_20230201_201813466	dng	6	6	1
FieldData\Smithsonian Pictures\NOVA-DC-MD\Adult\22618	7	PXL_20230201_201823624.dng	763	PXL_20230201_201823624	dng	7	7	1
FieldData\Smithsonian Pictures\NOVA-DC-MD\Adult\22618	8	PXL_20230201_201824692.dng	764	PXL_20230201_201824692	dng	8	8	1
FieldData\Smithsonian Pictures\NOVA-DC-MD\Adult\22618	9	PXL_20230201_201832739.dng	765	PXL_20230201_201832739	dng	9	9	1
FieldData\Smithsonian Pictures\NOVA-DC-MD\Adult\22618	10	PXL_20230201_201833449.dng	766	PXL_20230201_201833449	dng	10	10	1
FieldData\Smithsonian Pictures\NOVA-DC-MD\Adult\22619	1	PXL_20230201_201751630.dng	767	PXL_20230201_201751630	dng	1	1	1
FieldData\Smithsonian Pictures\NOVA-DC-MD\Adult\22619	2	PXL_20230201_201753061.dng	768	PXL_20230201_201753061	dng	2	2	1
FieldData\Smithsonian Pictures\NOVA-DC-MD\Adult\22619	3	PXL_20230201_201804618.dng	769	PXL_20230201_201804618	dng	3	3	1
FieldData\Smithsonian Pictures\NOVA-DC-MD\Adult\22619	4	PXL_20230201_201805300.dng	770	PXL_20230201_201805300	dng	4	4	1
FieldData\Smithsonian Pictures\NOVA-DC-MD\Adult\22619	5	PXL_20230201_201812560.dng	771	PXL_20230201_201812560	dng	5	5	1
FieldData\Smithsonian Pictures\NOVA-DC-MD\Adult\22619	6	PXL_20230201_201813466.dng	772	PXL_20230201_201813466	dng	6	6	1
FieldData\Smithsonian Pictures\NOVA-DC-MD\Adult\22619	7	PXL_20230201_201823624.dng	773	PXL_20230201_201823624	dng	7	7	1
FieldData\Smithsonian Pictures\NOVA-DC-MD\Adult\22619	8	PXL_20230201_201824692.dng	774	PXL_20230201_201824692	dng	8	8	1
FieldData\Smithsonian Pictures\NOVA-DC-MD\Adult\22619	9	PXL_20230201_201832739.dng	775	PXL_20230201_201832739	dng	9	9	1
FieldData\Smithsonian Pictures\NOVA-DC-MD\Adult\22619	10	PXL_20230201_201833449.dng	776	PXL_20230201_201833449	dng	10	10	1
FieldData\Smithsonian Pictures\NOVA-DC-MD\Adult\27761	1	PXL_20230125_174054627.dng	777	PXL_20230125_174054627	dng	4	1	0
FieldData\Smithsonian Pictures\NOVA-DC-MD\Adult\27761	2	PXL_20230125_174055636.dng	778	PXL_20230125_174055636	dng	5	2	0
FieldData\Smithsonian Pictures\NOVA-DC-MD\Adult\27761	3	PXL_20230125_174116124.dng	779	PXL_20230125_174116124	dng	6	3	0
FieldData\Smithsonian Pictures\NOVA-DC-MD\Adult\27761	4	PXL_20230125_174116871.dng	780	PXL_20230125_174116871	dng	7	4	0
FieldData\Smithsonian Pictures\NOVA-DC-MD\Adult\27761	5	PXL_20230125_174132554.dng	781	PXL_20230125_174132554	dng	8	5	0
FieldData\Smithsonian Pictures\NOVA-DC-MD\Adult\27761	6	PXL_20230125_174133216.dng	782	PXL_20230125_174133216	dng	9	6	0
FieldData\Smithsonian Pictures\NOVA-DC-MD\Adult\27761	7	PXL_20230125_174143388.dng	783	PXL_20230125_174143388	dng	10	7	0
FieldData\Smithsonian Pictures\NOVA-DC-MD\Adult\27761	8	PXL_20230125_174144151.dng	784	PXL_20230125_174144151	dng	11	8	0
FieldData\Smithsonian Pictures\NOVA-DC-MD\Adult\27761	9	aPXL_20230214_194151616.dng	785	aPXL_20230214_194151616	dng	1	9	0
FieldData\Smithsonian Pictures\NOVA-DC-MD\Adult\27761	10	aPXL_20230214_194154358.dng	786	aPXL_20230214_194154358	dng	2	10	0
FieldData\Smithsonian Pictures\NOVA-DC-MD\Adult\27761	11	aPXL_20230214_194156115.dng	787	aPXL_20230214_194156115	dng	3	11	0
FieldData\Smithsonian Pictures\NOVA-DC-MD\Adult\288179	1	PXL_20230207_154510724.dng	788	PXL_20230207_154510724	dng	1	1	1
FieldData\Smithsonian Pictures\NOVA-DC-MD\Adult\288179	2	PXL_20230207_154514268.dng	789	PXL_20230207_154514268	dng	2	2	1
FieldData\Smithsonian Pictures\NOVA-DC-MD\Adult\288179	3	PXL_20230207_154518690.dng	790	PXL_20230207_154518690	dng	3	3	1
FieldData\Smithsonian Pictures\NOVA-DC-MD\Adult\288179	4	PXL_20230207_154531999.dng	791	PXL_20230207_154531999	dng	4	4	1
FieldData\Smithsonian Pictures\NOVA-DC-MD\Adult\288179	5	PXL_20230207_154532910.dng	792	PXL_20230207_154532910	dng	5	5	1
FieldData\Smithsonian Pictures\NOVA-DC-MD\Adult\288179	6	PXL_20230207_154544140.dng	793	PXL_20230207_154544140	dng	6	6	1
FieldData\Smithsonian Pictures\NOVA-DC-MD\Adult\288179	7	PXL_20230207_154544797.dng	794	PXL_20230207_154544797	dng	7	7	1
FieldData\Smithsonian Pictures\NOVA-DC-MD\Adult\288179	8	PXL_20230207_154553549.dng	795	PXL_20230207_154553549	dng	8	8	1
FieldData\Smithsonian Pictures\NOVA-DC-MD\Adult\288179	9	PXL_20230207_154555363.dng	796	PXL_20230207_154555363	dng	9	9	1
FieldData\Smithsonian Pictures\NOVA-DC-MD\Adult\288179	10	PXL_20230207_154605357.dng	797	PXL_20230207_154605357	dng	10	10	1
FieldData\Smithsonian Pictures\NOVA-DC-MD\Adult\288179	11	PXL_20230207_154606611.dng	798	PXL_20230207_154606611	dng	11	11	1
FieldData\Smithsonian Pictures\NOVA-DC-MD\Adult\288184	1	PXL_20230207_171109607.dng	799	PXL_20230207_171109607	dng	1	1	1
FieldData\Smithsonian Pictures\NOVA-DC-MD\Adult\288184	2	PXL_20230207_171111356.dng	800	PXL_20230207_171111356	dng	2	2	1
FieldData\Smithsonian Pictures\NOVA-DC-MD\Adult\288184	3	PXL_20230207_171113580.dng	801	PXL_20230207_171113580	dng	3	3	1
FieldData\Smithsonian Pictures\NOVA-DC-MD\Adult\288184	4	PXL_20230207_171132844.dng	802	PXL_20230207_171132844	dng	4	4	1
FieldData\Smithsonian Pictures\NOVA-DC-MD\Adult\288184	5	PXL_20230207_171134979.dng	803	PXL_20230207_171134979	dng	5	5	1
FieldData\Smithsonian Pictures\NOVA-DC-MD\Adult\288184	6	PXL_20230207_171146902.dng	804	PXL_20230207_171146902	dng	6	6	1
FieldData\Smithsonian Pictures\NOVA-DC-MD\Adult\288184	7	PXL_20230207_171147796.dng	805	PXL_20230207_171147796	dng	7	7	1
FieldData\Smithsonian Pictures\NOVA-DC-MD\Adult\288184	8	PXL_20230207_171157155.dng	806	PXL_20230207_171157155	dng	8	8	1
FieldData\Smithsonian Pictures\NOVA-DC-MD\Adult\288184	9	PXL_20230207_171157945.dng	807	PXL_20230207_171157945	dng	9	9	1
FieldData\Smithsonian Pictures\NOVA-DC-MD\Adult\288184	10	PXL_20230207_171205378.dng	808	PXL_20230207_171205378	dng	10	10	1
FieldData\Smithsonian Pictures\NOVA-DC-MD\Adult\288184	11	PXL_20230207_171206601.dng	809	PXL_20230207_171206601	dng	11	11	1
FieldData\Smithsonian Pictures\NOVA-DC-MD\Adult\288185	1	PXL_20230207_172343181.dng	810	PXL_20230207_172343181	dng	1	1	1
FieldData\Smithsonian Pictures\NOVA-DC-MD\Adult\288185	2	PXL_20230207_172346011.dng	811	PXL_20230207_172346011	dng	2	2	1
FieldData\Smithsonian Pictures\NOVA-DC-MD\Adult\288185	3	PXL_20230207_172350383.dng	812	PXL_20230207_172350383	dng	3	3	1
FieldData\Smithsonian Pictures\NOVA-DC-MD\Adult\288185	4	PXL_20230207_172416191.dng	813	PXL_20230207_172416191	dng	4	4	1
FieldData\Smithsonian Pictures\NOVA-DC-MD\Adult\288185	5	PXL_20230207_172418585.dng	814	PXL_20230207_172418585	dng	5	5	1
FieldData\Smithsonian Pictures\NOVA-DC-MD\Adult\288185	6	PXL_20230207_172429553.dng	815	PXL_20230207_172429553	dng	6	6	1
FieldData\Smithsonian Pictures\NOVA-DC-MD\Adult\288185	7	PXL_20230207_172431934.dng	816	PXL_20230207_172431934	dng	7	7	1
FieldData\Smithsonian Pictures\NOVA-DC-MD\Adult\288185	8	PXL_20230207_172442842.dng	817	PXL_20230207_172442842	dng	8	8	1
FieldData\Smithsonian Pictures\NOVA-DC-MD\Adult\288185	9	PXL_20230207_172444044.dng	818	PXL_20230207_172444044	dng	9	9	1
FieldData\Smithsonian Pictures\NOVA-DC-MD\Adult\288185	10	PXL_20230207_172454403.dng	819	PXL_20230207_172454403	dng	10	10	1
FieldData\Smithsonian Pictures\NOVA-DC-MD\Adult\288185	11	PXL_20230207_172455379.dng	820	PXL_20230207_172455379	dng	11	11	1
FieldData\Smithsonian Pictures\NOVA-DC-MD\Adult\288186	1	PXL_20230207_160752865.dng	821	PXL_20230207_160752865	dng	1	1	1
FieldData\Smithsonian Pictures\NOVA-DC-MD\Adult\288186	2	PXL_20230207_160757466.dng	822	PXL_20230207_160757466	dng	2	2	1
FieldData\Smithsonian Pictures\NOVA-DC-MD\Adult\288186	3	PXL_20230207_160759827.dng	823	PXL_20230207_160759827	dng	3	3	1
FieldData\Smithsonian Pictures\NOVA-DC-MD\Adult\288186	4	PXL_20230207_160817318.dng	824	PXL_20230207_160817318	dng	4	4	1
FieldData\Smithsonian Pictures\NOVA-DC-MD\Adult\288186	5	PXL_20230207_160818293.dng	825	PXL_20230207_160818293	dng	5	5	1
FieldData\Smithsonian Pictures\NOVA-DC-MD\Adult\288186	6	PXL_20230207_160827020.dng	826	PXL_20230207_160827020	dng	6	6	1
FieldData\Smithsonian Pictures\NOVA-DC-MD\Adult\288186	7	PXL_20230207_160827875.dng	827	PXL_20230207_160827875	dng	7	7	1
FieldData\Smithsonian Pictures\NOVA-DC-MD\Adult\288186	8	PXL_20230207_160837363.dng	828	PXL_20230207_160837363	dng	8	8	1
FieldData\Smithsonian Pictures\NOVA-DC-MD\Adult\288186	9	PXL_20230207_160838238.dng	829	PXL_20230207_160838238	dng	9	9	1
FieldData\Smithsonian Pictures\NOVA-DC-MD\Adult\288186	10	PXL_20230207_160848550.dng	830	PXL_20230207_160848550	dng	10	10	1
FieldData\Smithsonian Pictures\NOVA-DC-MD\Adult\288186	11	PXL_20230207_160851732.dng	831	PXL_20230207_160851732	dng	11	11	1
FieldData\Smithsonian Pictures\NOVA-DC-MD\Adult\288187	1	PXL_20230207_174721759.dng	832	PXL_20230207_174721759	dng	1	1	1
FieldData\Smithsonian Pictures\NOVA-DC-MD\Adult\288187	2	PXL_20230207_174724677.dng	833	PXL_20230207_174724677	dng	2	2	1
FieldData\Smithsonian Pictures\NOVA-DC-MD\Adult\288187	3	PXL_20230207_174738295.dng	834	PXL_20230207_174738295	dng	3	3	1
FieldData\Smithsonian Pictures\NOVA-DC-MD\Adult\288187	4	PXL_20230207_174739357.dng	835	PXL_20230207_174739357	dng	4	4	1
FieldData\Smithsonian Pictures\NOVA-DC-MD\Adult\288187	5	PXL_20230207_174750981.dng	836	PXL_20230207_174750981	dng	5	5	1
FieldData\Smithsonian Pictures\NOVA-DC-MD\Adult\288187	6	PXL_20230207_174752396.dng	837	PXL_20230207_174752396	dng	6	6	1
FieldData\Smithsonian Pictures\NOVA-DC-MD\Adult\288187	7	PXL_20230207_174935935.dng	838	PXL_20230207_174935935	dng	7	7	1
FieldData\Smithsonian Pictures\NOVA-DC-MD\Adult\288187	8	PXL_20230207_174937344.dng	839	PXL_20230207_174937344	dng	8	8	1
FieldData\Smithsonian Pictures\NOVA-DC-MD\Adult\288187	9	PXL_20230207_174947513.dng	840	PXL_20230207_174947513	dng	9	9	1
FieldData\Smithsonian Pictures\NOVA-DC-MD\Adult\288187	10	PXL_20230207_174949330.dng	841	PXL_20230207_174949330	dng	10	10	1
FieldData\Smithsonian Pictures\NOVA-DC-MD\Adult\288188	1	PXL_20230207_161536433.dng	842	PXL_20230207_161536433	dng	1	1	1
FieldData\Smithsonian Pictures\NOVA-DC-MD\Adult\288188	2	PXL_20230207_161538176.dng	843	PXL_20230207_161538176	dng	2	2	1
FieldData\Smithsonian Pictures\NOVA-DC-MD\Adult\288188	3	PXL_20230207_161540532.dng	844	PXL_20230207_161540532	dng	3	3	1
FieldData\Smithsonian Pictures\NOVA-DC-MD\Adult\288188	4	PXL_20230207_161615716.dng	845	PXL_20230207_161615716	dng	4	4	1
FieldData\Smithsonian Pictures\NOVA-DC-MD\Adult\288188	5	PXL_20230207_161617564.dng	846	PXL_20230207_161617564	dng	5	5	1
FieldData\Smithsonian Pictures\NOVA-DC-MD\Adult\288188	6	PXL_20230207_161634473.dng	847	PXL_20230207_161634473	dng	6	6	1
FieldData\Smithsonian Pictures\NOVA-DC-MD\Adult\288188	7	PXL_20230207_161635224.dng	848	PXL_20230207_161635224	dng	7	7	1
FieldData\Smithsonian Pictures\NOVA-DC-MD\Adult\288188	8	PXL_20230207_161648264.dng	849	PXL_20230207_161648264	dng	8	8	1
FieldData\Smithsonian Pictures\NOVA-DC-MD\Adult\288188	9	PXL_20230207_161648976.dng	850	PXL_20230207_161648976	dng	9	9	1
FieldData\Smithsonian Pictures\NOVA-DC-MD\Adult\288188	10	PXL_20230207_161659685.dng	851	PXL_20230207_161659685	dng	10	10	1
FieldData\Smithsonian Pictures\NOVA-DC-MD\Adult\288188	11	PXL_20230207_161700973.dng	852	PXL_20230207_161700973	dng	11	11	1
FieldData\Smithsonian Pictures\NOVA-DC-MD\Adult\288189	1	PXL_20230207_165914983.dng	853	PXL_20230207_165914983	dng	1	1	1
FieldData\Smithsonian Pictures\NOVA-DC-MD\Adult\288189	2	PXL_20230207_165916294.dng	854	PXL_20230207_165916294	dng	2	2	1
FieldData\Smithsonian Pictures\NOVA-DC-MD\Adult\288189	3	PXL_20230207_165917456.dng	855	PXL_20230207_165917456	dng	3	3	1
FieldData\Smithsonian Pictures\NOVA-DC-MD\Adult\288189	4	PXL_20230207_165930693.dng	856	PXL_20230207_165930693	dng	4	4	1
FieldData\Smithsonian Pictures\NOVA-DC-MD\Adult\288189	5	PXL_20230207_165931581.dng	857	PXL_20230207_165931581	dng	5	5	1
FieldData\Smithsonian Pictures\NOVA-DC-MD\Adult\288189	6	PXL_20230207_165938557.dng	858	PXL_20230207_165938557	dng	6	6	1
FieldData\Smithsonian Pictures\NOVA-DC-MD\Adult\288189	7	PXL_20230207_165940595.dng	859	PXL_20230207_165940595	dng	7	7	1
FieldData\Smithsonian Pictures\NOVA-DC-MD\Adult\288189	8	PXL_20230207_165954037.dng	860	PXL_20230207_165954037	dng	8	8	1
FieldData\Smithsonian Pictures\NOVA-DC-MD\Adult\288189	9	PXL_20230207_165954745.dng	861	PXL_20230207_165954745	dng	9	9	1
FieldData\Smithsonian Pictures\NOVA-DC-MD\Adult\288189	10	PXL_20230207_170000424.dng	862	PXL_20230207_170000424	dng	10	10	1
FieldData\Smithsonian Pictures\NOVA-DC-MD\Adult\288189	11	PXL_20230207_170001039.dng	863	PXL_20230207_170001039	dng	11	11	1
FieldData\Smithsonian Pictures\NOVA-DC-MD\Adult\288190	1	PXL_20230207_162850368.dng	864	PXL_20230207_162850368	dng	1	1	1
FieldData\Smithsonian Pictures\NOVA-DC-MD\Adult\288190	2	PXL_20230207_162852607.dng	865	PXL_20230207_162852607	dng	2	2	1
FieldData\Smithsonian Pictures\NOVA-DC-MD\Adult\288190	3	PXL_20230207_162855884.dng	866	PXL_20230207_162855884	dng	3	3	1
FieldData\Smithsonian Pictures\NOVA-DC-MD\Adult\288190	4	PXL_20230207_162910633.dng	867	PXL_20230207_162910633	dng	4	4	1
FieldData\Smithsonian Pictures\NOVA-DC-MD\Adult\288190	5	PXL_20230207_162911537.dng	868	PXL_20230207_162911537	dng	5	5	1
FieldData\Smithsonian Pictures\NOVA-DC-MD\Adult\288190	6	PXL_20230207_162923753.dng	869	PXL_20230207_162923753	dng	6	6	1
FieldData\Smithsonian Pictures\NOVA-DC-MD\Adult\288190	7	PXL_20230207_162925268.dng	870	PXL_20230207_162925268	dng	7	7	1
FieldData\Smithsonian Pictures\NOVA-DC-MD\Adult\288190	8	PXL_20230207_162936291.dng	871	PXL_20230207_162936291	dng	8	8	1
FieldData\Smithsonian Pictures\NOVA-DC-MD\Adult\288190	9	PXL_20230207_162936820.dng	872	PXL_20230207_162936820	dng	9	9	1
FieldData\Smithsonian Pictures\NOVA-DC-MD\Adult\288190	10	PXL_20230207_162945266.dng	873	PXL_20230207_162945266	dng	10	10	1
FieldData\Smithsonian Pictures\NOVA-DC-MD\Adult\288190	11	PXL_20230207_162946134.dng	874	PXL_20230207_162946134	dng	11	11	1
FieldData\Smithsonian Pictures\NOVA-DC-MD\Adult\288199	1	PXL_20230207_190327245.dng	875	PXL_20230207_190327245	dng	1	1	1
FieldData\Smithsonian Pictures\NOVA-DC-MD\Adult\288199	2	PXL_20230207_190330038.dng	876	PXL_20230207_190330038	dng	2	2	1
FieldData\Smithsonian Pictures\NOVA-DC-MD\Adult\288199	3	PXL_20230207_190332130.dng	877	PXL_20230207_190332130	dng	3	3	1
FieldData\Smithsonian Pictures\NOVA-DC-MD\Adult\288199	4	PXL_20230207_190343535.dng	878	PXL_20230207_190343535	dng	4	4	1
FieldData\Smithsonian Pictures\NOVA-DC-MD\Adult\288199	5	PXL_20230207_190344835.dng	879	PXL_20230207_190344835	dng	5	5	1
FieldData\Smithsonian Pictures\NOVA-DC-MD\Adult\288199	6	PXL_20230207_190353947.dng	880	PXL_20230207_190353947	dng	6	6	1
FieldData\Smithsonian Pictures\NOVA-DC-MD\Adult\288199	7	PXL_20230207_190355022.dng	881	PXL_20230207_190355022	dng	7	7	1
FieldData\Smithsonian Pictures\NOVA-DC-MD\Adult\288199	8	PXL_20230207_190403630.dng	882	PXL_20230207_190403630	dng	8	8	1
FieldData\Smithsonian Pictures\NOVA-DC-MD\Adult\288199	9	PXL_20230207_190404380.dng	883	PXL_20230207_190404380	dng	9	9	1
FieldData\Smithsonian Pictures\NOVA-DC-MD\Adult\288199	10	PXL_20230207_190411718.dng	884	PXL_20230207_190411718	dng	10	10	1
FieldData\Smithsonian Pictures\NOVA-DC-MD\Adult\288199	11	PXL_20230207_190415768.dng	885	PXL_20230207_190415768	dng	11	11	1
FieldData\Smithsonian Pictures\NOVA-DC-MD\Adult\288209	1	PXL_20230207_172934972.dng	886	PXL_20230207_172934972	dng	1	1	1
FieldData\Smithsonian Pictures\NOVA-DC-MD\Adult\288209	2	PXL_20230207_172937467.dng	887	PXL_20230207_172937467	dng	2	2	1
FieldData\Smithsonian Pictures\NOVA-DC-MD\Adult\288209	3	PXL_20230207_172939734.dng	888	PXL_20230207_172939734	dng	3	3	1
FieldData\Smithsonian Pictures\NOVA-DC-MD\Adult\288209	4	PXL_20230207_172951845.dng	889	PXL_20230207_172951845	dng	4	4	1
FieldData\Smithsonian Pictures\NOVA-DC-MD\Adult\288209	5	PXL_20230207_172953168.dng	890	PXL_20230207_172953168	dng	5	5	1
FieldData\Smithsonian Pictures\NOVA-DC-MD\Adult\288209	6	PXL_20230207_173002552.dng	891	PXL_20230207_173002552	dng	6	6	1
FieldData\Smithsonian Pictures\NOVA-DC-MD\Adult\288209	7	PXL_20230207_173003585.dng	892	PXL_20230207_173003585	dng	7	7	1
FieldData\Smithsonian Pictures\NOVA-DC-MD\Adult\288209	8	PXL_20230207_173011823.dng	893	PXL_20230207_173011823	dng	8	8	1
FieldData\Smithsonian Pictures\NOVA-DC-MD\Adult\288209	9	PXL_20230207_173012442.dng	894	PXL_20230207_173012442	dng	9	9	1
FieldData\Smithsonian Pictures\NOVA-DC-MD\Adult\288209	10	PXL_20230207_173024040.dng	895	PXL_20230207_173024040	dng	10	10	1
FieldData\Smithsonian Pictures\NOVA-DC-MD\Adult\288209	11	PXL_20230207_173027299.dng	896	PXL_20230207_173027299	dng	11	11	1
FieldData\Smithsonian Pictures\NOVA-DC-MD\Adult\288210	1	PXL_20230207_170352484.dng	897	PXL_20230207_170352484	dng	1	1	1
FieldData\Smithsonian Pictures\NOVA-DC-MD\Adult\288210	2	PXL_20230207_170354580.dng	898	PXL_20230207_170354580	dng	2	2	1
FieldData\Smithsonian Pictures\NOVA-DC-MD\Adult\288210	3	PXL_20230207_170359558.dng	899	PXL_20230207_170359558	dng	3	3	1
FieldData\Smithsonian Pictures\NOVA-DC-MD\Adult\288210	4	PXL_20230207_170411943.dng	900	PXL_20230207_170411943	dng	4	4	1
FieldData\Smithsonian Pictures\NOVA-DC-MD\Adult\288210	5	PXL_20230207_170412817.dng	901	PXL_20230207_170412817	dng	5	5	1
FieldData\Smithsonian Pictures\NOVA-DC-MD\Adult\288210	6	PXL_20230207_170425214.dng	902	PXL_20230207_170425214	dng	6	6	1
FieldData\Smithsonian Pictures\NOVA-DC-MD\Adult\288210	7	PXL_20230207_170425912.dng	903	PXL_20230207_170425912	dng	7	7	1
FieldData\Smithsonian Pictures\NOVA-DC-MD\Adult\288210	8	PXL_20230207_170440171.dng	904	PXL_20230207_170440171	dng	8	8	1
FieldData\Smithsonian Pictures\NOVA-DC-MD\Adult\288210	9	PXL_20230207_170440851.dng	905	PXL_20230207_170440851	dng	9	9	1
FieldData\Smithsonian Pictures\NOVA-DC-MD\Adult\288210	10	PXL_20230207_170456504.dng	906	PXL_20230207_170456504	dng	10	10	1
FieldData\Smithsonian Pictures\NOVA-DC-MD\Adult\288210	11	PXL_20230207_170458259.dng	907	PXL_20230207_170458259	dng	11	11	1
FieldData\Smithsonian Pictures\NOVA-DC-MD\Adult\29774	1	PXL_20230125_174733549.dng	908	PXL_20230125_174733549	dng	1	1	1
FieldData\Smithsonian Pictures\NOVA-DC-MD\Adult\29774	2	PXL_20230125_174735826.dng	909	PXL_20230125_174735826	dng	2	2	1
FieldData\Smithsonian Pictures\NOVA-DC-MD\Adult\29774	3	PXL_20230125_174757068.dng	910	PXL_20230125_174757068	dng	3	3	1
FieldData\Smithsonian Pictures\NOVA-DC-MD\Adult\29774	4	PXL_20230125_174757929.dng	911	PXL_20230125_174757929	dng	4	4	1
FieldData\Smithsonian Pictures\NOVA-DC-MD\Adult\29774	5	PXL_20230125_174819418.dng	912	PXL_20230125_174819418	dng	5	5	1
FieldData\Smithsonian Pictures\NOVA-DC-MD\Adult\29774	6	PXL_20230125_174820325.dng	913	PXL_20230125_174820325	dng	6	6	1
FieldData\Smithsonian Pictures\NOVA-DC-MD\Adult\29774	7	PXL_20230125_174832440.dng	914	PXL_20230125_174832440	dng	7	7	1
FieldData\Smithsonian Pictures\NOVA-DC-MD\Adult\29774	8	PXL_20230125_174833259.dng	915	PXL_20230125_174833259	dng	8	8	1
FieldData\Smithsonian Pictures\NOVA-DC-MD\Adult\29774	9	PXL_20230125_174843634.dng	916	PXL_20230125_174843634	dng	9	9	1
FieldData\Smithsonian Pictures\NOVA-DC-MD\Adult\29774	10	PXL_20230125_174844616.dng	917	PXL_20230125_174844616	dng	10	10	1
FieldData\Smithsonian Pictures\NOVA-DC-MD\Adult\326308	1	PXL_20230208_194806355.dng	918	PXL_20230208_194806355	dng	1	1	1
FieldData\Smithsonian Pictures\NOVA-DC-MD\Adult\326308	2	PXL_20230208_194811373.dng	919	PXL_20230208_194811373	dng	2	2	1
FieldData\Smithsonian Pictures\NOVA-DC-MD\Adult\326308	3	PXL_20230208_194813201.dng	920	PXL_20230208_194813201	dng	3	3	1
FieldData\Smithsonian Pictures\NOVA-DC-MD\Adult\326308	4	PXL_20230208_194829479.dng	921	PXL_20230208_194829479	dng	4	4	1
FieldData\Smithsonian Pictures\NOVA-DC-MD\Adult\326308	5	PXL_20230208_194830414.dng	922	PXL_20230208_194830414	dng	5	5	1
FieldData\Smithsonian Pictures\NOVA-DC-MD\Adult\326308	6	PXL_20230208_194844108.dng	923	PXL_20230208_194844108	dng	6	6	1
FieldData\Smithsonian Pictures\NOVA-DC-MD\Adult\326308	7	PXL_20230208_194849553.dng	924	PXL_20230208_194849553	dng	7	7	1
FieldData\Smithsonian Pictures\NOVA-DC-MD\Adult\326308	8	PXL_20230208_194856229.dng	925	PXL_20230208_194856229	dng	8	8	1
FieldData\Smithsonian Pictures\NOVA-DC-MD\Adult\326308	9	PXL_20230208_194858400.dng	926	PXL_20230208_194858400	dng	9	9	1
FieldData\Smithsonian Pictures\NOVA-DC-MD\Adult\326308	10	PXL_20230208_194907635.dng	927	PXL_20230208_194907635	dng	10	10	1
FieldData\Smithsonian Pictures\NOVA-DC-MD\Adult\326308	11	PXL_20230208_194909261.dng	928	PXL_20230208_194909261	dng	11	11	1
FieldData\Smithsonian Pictures\NOVA-DC-MD\Adult\36684	1	PXL_20230125_180023066.dng	929	PXL_20230125_180023066	dng	4	1	0
FieldData\Smithsonian Pictures\NOVA-DC-MD\Adult\36684	2	PXL_20230125_180024509.dng	930	PXL_20230125_180024509	dng	5	2	0
FieldData\Smithsonian Pictures\NOVA-DC-MD\Adult\36684	3	PXL_20230125_180037271.dng	931	PXL_20230125_180037271	dng	6	3	0
FieldData\Smithsonian Pictures\NOVA-DC-MD\Adult\36684	4	PXL_20230125_180038103.dng	932	PXL_20230125_180038103	dng	7	4	0
FieldData\Smithsonian Pictures\NOVA-DC-MD\Adult\36684	5	PXL_20230125_180052248.dng	933	PXL_20230125_180052248	dng	8	5	0
FieldData\Smithsonian Pictures\NOVA-DC-MD\Adult\36684	6	PXL_20230125_180052997.dng	934	PXL_20230125_180052997	dng	9	6	0
FieldData\Smithsonian Pictures\NOVA-DC-MD\Adult\36684	7	PXL_20230125_180107292.dng	935	PXL_20230125_180107292	dng	10	7	0
FieldData\Smithsonian Pictures\NOVA-DC-MD\Adult\36684	8	PXL_20230125_180108506.dng	936	PXL_20230125_180108506	dng	11	8	0
FieldData\Smithsonian Pictures\NOVA-DC-MD\Adult\36684	9	aPXL_20230214_194810132.dng	937	aPXL_20230214_194810132	dng	1	9	0
FieldData\Smithsonian Pictures\NOVA-DC-MD\Adult\36684	10	aPXL_20230214_194811408.dng	938	aPXL_20230214_194811408	dng	2	10	0
FieldData\Smithsonian Pictures\NOVA-DC-MD\Adult\36684	11	aPXL_20230214_194812591.dng	939	aPXL_20230214_194812591	dng	3	11	0
FieldData\Smithsonian Pictures\NOVA-DC-MD\Adult\42824	1	PXL_20230207_190759806.dng	940	PXL_20230207_190759806	dng	1	1	1
FieldData\Smithsonian Pictures\NOVA-DC-MD\Adult\42824	2	PXL_20230207_190802592.dng	941	PXL_20230207_190802592	dng	2	2	1
FieldData\Smithsonian Pictures\NOVA-DC-MD\Adult\42824	3	PXL_20230207_190808301.dng	942	PXL_20230207_190808301	dng	3	3	1
FieldData\Smithsonian Pictures\NOVA-DC-MD\Adult\42824	4	PXL_20230207_190819511.dng	943	PXL_20230207_190819511	dng	4	4	1
FieldData\Smithsonian Pictures\NOVA-DC-MD\Adult\42824	5	PXL_20230207_190820318.dng	944	PXL_20230207_190820318	dng	5	5	1
FieldData\Smithsonian Pictures\NOVA-DC-MD\Adult\42824	6	PXL_20230207_190830348.dng	945	PXL_20230207_190830348	dng	6	6	1
FieldData\Smithsonian Pictures\NOVA-DC-MD\Adult\42824	7	PXL_20230207_190830942.dng	946	PXL_20230207_190830942	dng	7	7	1
FieldData\Smithsonian Pictures\NOVA-DC-MD\Adult\42824	8	PXL_20230207_190842462.dng	947	PXL_20230207_190842462	dng	8	8	1
FieldData\Smithsonian Pictures\NOVA-DC-MD\Adult\42824	9	PXL_20230207_190843170.dng	948	PXL_20230207_190843170	dng	9	9	1
FieldData\Smithsonian Pictures\NOVA-DC-MD\Adult\42824	10	PXL_20230207_190854478.dng	949	PXL_20230207_190854478	dng	10	10	1
FieldData\Smithsonian Pictures\NOVA-DC-MD\Adult\42824	11	PXL_20230207_190855237.dng	950	PXL_20230207_190855237	dng	11	11	1
FieldData\Smithsonian Pictures\NOVA-DC-MD\Adult\42825	1	PXL_20230125_185501109.dng	951	PXL_20230125_185501109	dng	1	1	1
FieldData\Smithsonian Pictures\NOVA-DC-MD\Adult\42825	2	PXL_20230125_185502038.dng	952	PXL_20230125_185502038	dng	2	2	1
FieldData\Smithsonian Pictures\NOVA-DC-MD\Adult\42825	3	PXL_20230125_185529341.dng	953	PXL_20230125_185529341	dng	3	3	1
FieldData\Smithsonian Pictures\NOVA-DC-MD\Adult\42825	4	PXL_20230125_185530118.dng	954	PXL_20230125_185530118	dng	4	4	1
FieldData\Smithsonian Pictures\NOVA-DC-MD\Adult\42825	5	PXL_20230125_185538591.dng	955	PXL_20230125_185538591	dng	5	5	1
FieldData\Smithsonian Pictures\NOVA-DC-MD\Adult\42825	6	PXL_20230125_185539374.dng	956	PXL_20230125_185539374	dng	6	6	1
FieldData\Smithsonian Pictures\NOVA-DC-MD\Adult\42825	7	PXL_20230125_185547778.dng	957	PXL_20230125_185547778	dng	7	7	1
FieldData\Smithsonian Pictures\NOVA-DC-MD\Adult\42825	8	PXL_20230125_185548497.dng	958	PXL_20230125_185548497	dng	8	8	1
FieldData\Smithsonian Pictures\NOVA-DC-MD\Adult\42825	9	PXL_20230125_185603518.dng	959	PXL_20230125_185603518	dng	9	9	1
FieldData\Smithsonian Pictures\NOVA-DC-MD\Adult\42825	10	PXL_20230125_185604343.dng	960	PXL_20230125_185604343	dng	10	10	1
FieldData\Smithsonian Pictures\NOVA-DC-MD\Adult\45346	1	PXL_20230125_190526020.dng	961	PXL_20230125_190526020	dng	4	1	0
FieldData\Smithsonian Pictures\NOVA-DC-MD\Adult\45346	2	PXL_20230125_190526877.dng	962	PXL_20230125_190526877	dng	5	2	0
FieldData\Smithsonian Pictures\NOVA-DC-MD\Adult\45346	3	PXL_20230125_190540166.dng	963	PXL_20230125_190540166	dng	6	3	0
FieldData\Smithsonian Pictures\NOVA-DC-MD\Adult\45346	4	PXL_20230125_190552064.dng	964	PXL_20230125_190552064	dng	7	4	0
FieldData\Smithsonian Pictures\NOVA-DC-MD\Adult\45346	5	PXL_20230125_190552862.dng	965	PXL_20230125_190552862	dng	8	5	0
FieldData\Smithsonian Pictures\NOVA-DC-MD\Adult\45346	6	PXL_20230125_190608100.dng	966	PXL_20230125_190608100	dng	9	6	0
FieldData\Smithsonian Pictures\NOVA-DC-MD\Adult\45346	7	PXL_20230125_190608950.dng	967	PXL_20230125_190608950	dng	10	7	0
FieldData\Smithsonian Pictures\NOVA-DC-MD\Adult\45346	8	aPXL_20230214_195338877.dng	968	aPXL_20230214_195338877	dng	1	8	0
FieldData\Smithsonian Pictures\NOVA-DC-MD\Adult\45346	9	aPXL_20230214_195341403.dng	969	aPXL_20230214_195341403	dng	2	9	0
FieldData\Smithsonian Pictures\NOVA-DC-MD\Adult\45346	10	aPXL_20230214_195343527.dng	970	aPXL_20230214_195343527	dng	3	10	0
FieldData\Smithsonian Pictures\NOVA-DC-MD\Adult\45769	1	PXL_20230125_191244184.dng	971	PXL_20230125_191244184	dng	1	1	1
FieldData\Smithsonian Pictures\NOVA-DC-MD\Adult\45769	2	PXL_20230125_191245573.dng	972	PXL_20230125_191245573	dng	2	2	1
FieldData\Smithsonian Pictures\NOVA-DC-MD\Adult\45769	3	PXL_20230125_191316337.dng	973	PXL_20230125_191316337	dng	3	3	1
FieldData\Smithsonian Pictures\NOVA-DC-MD\Adult\45769	4	PXL_20230125_191316983.dng	974	PXL_20230125_191316983	dng	4	4	1
FieldData\Smithsonian Pictures\NOVA-DC-MD\Adult\45769	5	PXL_20230125_191332000.dng	975	PXL_20230125_191332000	dng	5	5	1
FieldData\Smithsonian Pictures\NOVA-DC-MD\Adult\45769	6	PXL_20230125_191332643.dng	976	PXL_20230125_191332643	dng	6	6	1
FieldData\Smithsonian Pictures\NOVA-DC-MD\Adult\45769	7	PXL_20230125_191342631.dng	977	PXL_20230125_191342631	dng	7	7	1
FieldData\Smithsonian Pictures\NOVA-DC-MD\Adult\45769	8	PXL_20230125_191343442.dng	978	PXL_20230125_191343442	dng	8	8	1
FieldData\Smithsonian Pictures\NOVA-DC-MD\Adult\45769	9	PXL_20230125_191353803.dng	979	PXL_20230125_191353803	dng	9	9	1
FieldData\Smithsonian Pictures\NOVA-DC-MD\Adult\45769	10	PXL_20230125_191354763.dng	980	PXL_20230125_191354763	dng	10	10	1
FieldData\Smithsonian Pictures\NOVA-DC-MD\Adult\45779	1	PXL_20230214_183639129.dng	981	PXL_20230214_183639129	dng	1	1	1
FieldData\Smithsonian Pictures\NOVA-DC-MD\Adult\45779	2	PXL_20230214_183641475.dng	982	PXL_20230214_183641475	dng	2	2	1
FieldData\Smithsonian Pictures\NOVA-DC-MD\Adult\45779	3	PXL_20230214_183643951.dng	983	PXL_20230214_183643951	dng	3	3	1
FieldData\Smithsonian Pictures\NOVA-DC-MD\Adult\45779	4	PXL_20230214_183701099.dng	984	PXL_20230214_183701099	dng	4	4	1
FieldData\Smithsonian Pictures\NOVA-DC-MD\Adult\45779	5	PXL_20230214_183702491.dng	985	PXL_20230214_183702491	dng	5	5	1
FieldData\Smithsonian Pictures\NOVA-DC-MD\Adult\45779	6	PXL_20230214_183713192.dng	986	PXL_20230214_183713192	dng	6	6	1
FieldData\Smithsonian Pictures\NOVA-DC-MD\Adult\45779	7	PXL_20230214_183715277.dng	987	PXL_20230214_183715277	dng	7	7	1
FieldData\Smithsonian Pictures\NOVA-DC-MD\Adult\45779	8	PXL_20230214_183730226.dng	988	PXL_20230214_183730226	dng	8	8	1
FieldData\Smithsonian Pictures\NOVA-DC-MD\Adult\45779	9	PXL_20230214_183731290.dng	989	PXL_20230214_183731290	dng	9	9	1
FieldData\Smithsonian Pictures\NOVA-DC-MD\Adult\45779	10	PXL_20230214_183748244.dng	990	PXL_20230214_183748244	dng	10	10	1
FieldData\Smithsonian Pictures\NOVA-DC-MD\Adult\45779	11	PXL_20230214_183749129.dng	991	PXL_20230214_183749129	dng	11	11	1
FieldData\Smithsonian Pictures\NOVA-DC-MD\Adult\49607	1	PXL_20230125_194028906.dng	992	PXL_20230125_194028906	dng	1	1	1
FieldData\Smithsonian Pictures\NOVA-DC-MD\Adult\49607	2	PXL_20230125_194029704.dng	993	PXL_20230125_194029704	dng	2	2	1
FieldData\Smithsonian Pictures\NOVA-DC-MD\Adult\49607	3	PXL_20230125_194048470.dng	994	PXL_20230125_194048470	dng	3	3	1
FieldData\Smithsonian Pictures\NOVA-DC-MD\Adult\49607	4	PXL_20230125_194049360.dng	995	PXL_20230125_194049360	dng	4	4	1
FieldData\Smithsonian Pictures\NOVA-DC-MD\Adult\49607	5	PXL_20230125_194100165.dng	996	PXL_20230125_194100165	dng	5	5	1
FieldData\Smithsonian Pictures\NOVA-DC-MD\Adult\49607	6	PXL_20230125_194100869.dng	997	PXL_20230125_194100869	dng	6	6	1
FieldData\Smithsonian Pictures\NOVA-DC-MD\Adult\49607	7	PXL_20230125_194117035.dng	998	PXL_20230125_194117035	dng	7	7	1
FieldData\Smithsonian Pictures\NOVA-DC-MD\Adult\49607	8	PXL_20230125_194118020.dng	999	PXL_20230125_194118020	dng	8	8	1
FieldData\Smithsonian Pictures\NOVA-DC-MD\Adult\49607	9	PXL_20230125_194127596.dng	1000	PXL_20230125_194127596	dng	9	9	1
FieldData\Smithsonian Pictures\NOVA-DC-MD\Adult\49607	10	PXL_20230125_194128341.dng	1001	PXL_20230125_194128341	dng	10	10	1
FieldData\Smithsonian Pictures\NOVA-DC-MD\Adult\49607	11	PXL_20230125_194825592.dng	1002	PXL_20230125_194825592	dng	11	11	1
FieldData\Smithsonian Pictures\NOVA-DC-MD\Adult\52615	1	PXL_20230125_195350611.dng	1003	PXL_20230125_195350611	dng	1	1	1
FieldData\Smithsonian Pictures\NOVA-DC-MD\Adult\52615	2	PXL_20230125_195351621.dng	1004	PXL_20230125_195351621	dng	2	2	1
FieldData\Smithsonian Pictures\NOVA-DC-MD\Adult\52615	3	PXL_20230125_195414556.dng	1005	PXL_20230125_195414556	dng	3	3	1
FieldData\Smithsonian Pictures\NOVA-DC-MD\Adult\52615	4	PXL_20230125_195415455.dng	1006	PXL_20230125_195415455	dng	4	4	1
FieldData\Smithsonian Pictures\NOVA-DC-MD\Adult\52615	5	PXL_20230125_195424935.dng	1007	PXL_20230125_195424935	dng	5	5	1
FieldData\Smithsonian Pictures\NOVA-DC-MD\Adult\52615	6	PXL_20230125_195425643.dng	1008	PXL_20230125_195425643	dng	6	6	1
FieldData\Smithsonian Pictures\NOVA-DC-MD\Adult\52615	7	PXL_20230125_195436823.dng	1009	PXL_20230125_195436823	dng	7	7	1
FieldData\Smithsonian Pictures\NOVA-DC-MD\Adult\52615	8	PXL_20230125_195437417.dng	1010	PXL_20230125_195437417	dng	8	8	1
FieldData\Smithsonian Pictures\NOVA-DC-MD\Adult\52615	9	PXL_20230125_195445713.dng	1011	PXL_20230125_195445713	dng	9	9	1
FieldData\Smithsonian Pictures\NOVA-DC-MD\Adult\52615	10	PXL_20230125_195446420.dng	1012	PXL_20230125_195446420	dng	10	10	1
FieldData\Smithsonian Pictures\NOVA-DC-MD\Adult\575054	1	PXL_20230210_184848930.dng	1013	PXL_20230210_184848930	dng	1	1	1
FieldData\Smithsonian Pictures\NOVA-DC-MD\Adult\575054	2	PXL_20230210_184852437.dng	1014	PXL_20230210_184852437	dng	2	2	1
FieldData\Smithsonian Pictures\NOVA-DC-MD\Adult\575054	3	PXL_20230210_184854405.dng	1015	PXL_20230210_184854405	dng	3	3	1
FieldData\Smithsonian Pictures\NOVA-DC-MD\Adult\575054	4	PXL_20230210_184912358.dng	1016	PXL_20230210_184912358	dng	4	4	1
FieldData\Smithsonian Pictures\NOVA-DC-MD\Adult\575054	5	PXL_20230210_184913153.dng	1017	PXL_20230210_184913153	dng	5	5	1
FieldData\Smithsonian Pictures\NOVA-DC-MD\Adult\575054	6	PXL_20230210_184924144.dng	1018	PXL_20230210_184924144	dng	6	6	1
FieldData\Smithsonian Pictures\NOVA-DC-MD\Adult\575054	7	PXL_20230210_184926495.dng	1019	PXL_20230210_184926495	dng	7	7	1
FieldData\Smithsonian Pictures\NOVA-DC-MD\Adult\575054	8	PXL_20230210_184936372.dng	1020	PXL_20230210_184936372	dng	8	8	1
FieldData\Smithsonian Pictures\NOVA-DC-MD\Adult\575054	9	PXL_20230210_184937253.dng	1021	PXL_20230210_184937253	dng	9	9	1
FieldData\Smithsonian Pictures\NOVA-DC-MD\Adult\575054	10	PXL_20230210_184955141.dng	1022	PXL_20230210_184955141	dng	10	10	1
FieldData\Smithsonian Pictures\NOVA-DC-MD\Adult\575054	11	PXL_20230210_184955797.dng	1023	PXL_20230210_184955797	dng	11	11	1
FieldData\Smithsonian Pictures\NOVA-DC-MD\Adult\65908	1	PXL_20230131_153433134.dng	1024	PXL_20230131_153433134	dng	1	1	1
FieldData\Smithsonian Pictures\NOVA-DC-MD\Adult\65908	2	PXL_20230131_153435839.dng	1025	PXL_20230131_153435839	dng	2	2	1
FieldData\Smithsonian Pictures\NOVA-DC-MD\Adult\65908	3	PXL_20230131_153456788.dng	1026	PXL_20230131_153456788	dng	3	3	1
FieldData\Smithsonian Pictures\NOVA-DC-MD\Adult\65908	4	PXL_20230131_153457786.dng	1027	PXL_20230131_153457786	dng	4	4	1
FieldData\Smithsonian Pictures\NOVA-DC-MD\Adult\65908	5	PXL_20230131_153508359.dng	1028	PXL_20230131_153508359	dng	5	5	1
FieldData\Smithsonian Pictures\NOVA-DC-MD\Adult\65908	6	PXL_20230131_153510831.dng	1029	PXL_20230131_153510831	dng	6	6	1
FieldData\Smithsonian Pictures\NOVA-DC-MD\Adult\65908	7	PXL_20230131_153521590.dng	1030	PXL_20230131_153521590	dng	7	7	1
FieldData\Smithsonian Pictures\NOVA-DC-MD\Adult\65908	8	PXL_20230131_153522705.dng	1031	PXL_20230131_153522705	dng	8	8	1
FieldData\Smithsonian Pictures\NOVA-DC-MD\Adult\65908	9	PXL_20230131_153532204.dng	1032	PXL_20230131_153532204	dng	9	9	1
FieldData\Smithsonian Pictures\NOVA-DC-MD\Adult\65908	10	PXL_20230131_153532968.dng	1033	PXL_20230131_153532968	dng	10	10	1
FieldData\Smithsonian Pictures\NOVA-DC-MD\Juvenile\103824	1	PXL_20230131_193126211.dng	1034	PXL_20230131_193126211	dng	1	1	1
FieldData\Smithsonian Pictures\NOVA-DC-MD\Juvenile\103824	2	PXL_20230131_193129841.dng	1035	PXL_20230131_193129841	dng	2	2	1
FieldData\Smithsonian Pictures\NOVA-DC-MD\Juvenile\103824	3	PXL_20230131_193131310.dng	1036	PXL_20230131_193131310	dng	3	3	1
FieldData\Smithsonian Pictures\NOVA-DC-MD\Juvenile\103824	4	PXL_20230131_193145576.dng	1037	PXL_20230131_193145576	dng	4	4	1
FieldData\Smithsonian Pictures\NOVA-DC-MD\Juvenile\103824	5	PXL_20230131_193147025.dng	1038	PXL_20230131_193147025	dng	5	5	1
FieldData\Smithsonian Pictures\NOVA-DC-MD\Juvenile\103824	6	PXL_20230131_193154924.dng	1039	PXL_20230131_193154924	dng	6	6	1
FieldData\Smithsonian Pictures\NOVA-DC-MD\Juvenile\103824	7	PXL_20230131_193155964.dng	1040	PXL_20230131_193155964	dng	7	7	1
FieldData\Smithsonian Pictures\NOVA-DC-MD\Juvenile\103824	8	PXL_20230131_193202835.dng	1041	PXL_20230131_193202835	dng	8	8	1
FieldData\Smithsonian Pictures\NOVA-DC-MD\Juvenile\103824	9	PXL_20230131_193203569.dng	1042	PXL_20230131_193203569	dng	9	9	1
FieldData\Smithsonian Pictures\NOVA-DC-MD\Juvenile\103824	10	PXL_20230131_193211144.dng	1043	PXL_20230131_193211144	dng	10	10	1
FieldData\Smithsonian Pictures\NOVA-DC-MD\Juvenile\103824	11	PXL_20230131_193211940.dng	1044	PXL_20230131_193211940	dng	11	11	1
FieldData\Smithsonian Pictures\NOVA-DC-MD\Juvenile\139660	1	PXL_20230131_194226549.dng	1045	PXL_20230131_194226549	dng	1	1	1
FieldData\Smithsonian Pictures\NOVA-DC-MD\Juvenile\139660	2	PXL_20230131_194227878.dng	1046	PXL_20230131_194227878	dng	2	2	1
FieldData\Smithsonian Pictures\NOVA-DC-MD\Juvenile\139660	3	PXL_20230131_194243418.dng	1047	PXL_20230131_194243418	dng	3	3	1
FieldData\Smithsonian Pictures\NOVA-DC-MD\Juvenile\139660	4	PXL_20230131_194244550.dng	1048	PXL_20230131_194244550	dng	4	4	1
FieldData\Smithsonian Pictures\NOVA-DC-MD\Juvenile\139660	5	PXL_20230131_194255912.dng	1049	PXL_20230131_194255912	dng	5	5	1
FieldData\Smithsonian Pictures\NOVA-DC-MD\Juvenile\139660	6	PXL_20230131_194256540.dng	1050	PXL_20230131_194256540	dng	6	6	1
FieldData\Smithsonian Pictures\NOVA-DC-MD\Juvenile\139660	7	PXL_20230131_194304949.dng	1051	PXL_20230131_194304949	dng	7	7	1
FieldData\Smithsonian Pictures\NOVA-DC-MD\Juvenile\139660	8	PXL_20230131_194305915.dng	1052	PXL_20230131_194305915	dng	8	8	1
FieldData\Smithsonian Pictures\NOVA-DC-MD\Juvenile\139660	9	PXL_20230131_194319926.dng	1053	PXL_20230131_194319926	dng	9	9	1
FieldData\Smithsonian Pictures\NOVA-DC-MD\Juvenile\139660	10	PXL_20230131_194321428.dng	1054	PXL_20230131_194321428	dng	10	10	1
FieldData\Smithsonian Pictures\NOVA-DC-MD\Juvenile\141486	1	PXL_20230131_200700233.dng	1055	PXL_20230131_200700233	dng	1	1	1
FieldData\Smithsonian Pictures\NOVA-DC-MD\Juvenile\141486	2	PXL_20230131_200702920.dng	1056	PXL_20230131_200702920	dng	2	2	1
FieldData\Smithsonian Pictures\NOVA-DC-MD\Juvenile\141486	3	PXL_20230131_200716750.dng	1057	PXL_20230131_200716750	dng	3	3	1
FieldData\Smithsonian Pictures\NOVA-DC-MD\Juvenile\141486	4	PXL_20230131_200717655.dng	1058	PXL_20230131_200717655	dng	4	4	1
FieldData\Smithsonian Pictures\NOVA-DC-MD\Juvenile\141486	5	PXL_20230131_200727038.dng	1059	PXL_20230131_200727038	dng	5	5	1
FieldData\Smithsonian Pictures\NOVA-DC-MD\Juvenile\141486	6	PXL_20230131_200727831.dng	1060	PXL_20230131_200727831	dng	6	6	1
FieldData\Smithsonian Pictures\NOVA-DC-MD\Juvenile\141486	7	PXL_20230131_200739399.dng	1061	PXL_20230131_200739399	dng	7	7	1
FieldData\Smithsonian Pictures\NOVA-DC-MD\Juvenile\141486	8	PXL_20230131_200740001.dng	1062	PXL_20230131_200740001	dng	8	8	1
FieldData\Smithsonian Pictures\NOVA-DC-MD\Juvenile\141486	9	PXL_20230131_200749244.dng	1063	PXL_20230131_200749244	dng	9	9	1
FieldData\Smithsonian Pictures\NOVA-DC-MD\Juvenile\141486	10	PXL_20230131_200750673.dng	1064	PXL_20230131_200750673	dng	10	10	1
FieldData\Smithsonian Pictures\NOVA-DC-MD\Juvenile\141937	1	PXL_20230131_201424046.dng	1065	PXL_20230131_201424046	dng	1	1	1
FieldData\Smithsonian Pictures\NOVA-DC-MD\Juvenile\141937	2	PXL_20230131_201429690.dng	1066	PXL_20230131_201429690	dng	2	2	1
FieldData\Smithsonian Pictures\NOVA-DC-MD\Juvenile\141937	3	PXL_20230131_201442790.dng	1067	PXL_20230131_201442790	dng	3	3	1
FieldData\Smithsonian Pictures\NOVA-DC-MD\Juvenile\141937	4	PXL_20230131_201443689.dng	1068	PXL_20230131_201443689	dng	4	4	1
FieldData\Smithsonian Pictures\NOVA-DC-MD\Juvenile\141937	5	PXL_20230131_201451242.dng	1069	PXL_20230131_201451242	dng	5	5	1
FieldData\Smithsonian Pictures\NOVA-DC-MD\Juvenile\141937	6	PXL_20230131_201452017.dng	1070	PXL_20230131_201452017	dng	6	6	1
FieldData\Smithsonian Pictures\NOVA-DC-MD\Juvenile\141937	7	PXL_20230131_201459617.dng	1071	PXL_20230131_201459617	dng	7	7	1
FieldData\Smithsonian Pictures\NOVA-DC-MD\Juvenile\141937	8	PXL_20230131_201500353.dng	1072	PXL_20230131_201500353	dng	8	8	1
FieldData\Smithsonian Pictures\NOVA-DC-MD\Juvenile\141937	9	PXL_20230131_201514045.dng	1073	PXL_20230131_201514045	dng	9	9	1
FieldData\Smithsonian Pictures\NOVA-DC-MD\Juvenile\141937	10	PXL_20230131_201519522.dng	1074	PXL_20230131_201519522	dng	10	10	1
FieldData\Smithsonian Pictures\NOVA-DC-MD\Juvenile\16229	1	PXL_20230201_185458738.dng	1075	PXL_20230201_185458738	dng	1	1	1
FieldData\Smithsonian Pictures\NOVA-DC-MD\Juvenile\16229	2	PXL_20230201_185501686.dng	1076	PXL_20230201_185501686	dng	2	2	1
FieldData\Smithsonian Pictures\NOVA-DC-MD\Juvenile\16229	3	PXL_20230201_185514968.dng	1077	PXL_20230201_185514968	dng	3	3	1
FieldData\Smithsonian Pictures\NOVA-DC-MD\Juvenile\16229	4	PXL_20230201_185516089.dng	1078	PXL_20230201_185516089	dng	4	4	1
FieldData\Smithsonian Pictures\NOVA-DC-MD\Juvenile\16229	5	PXL_20230201_185525360.dng	1079	PXL_20230201_185525360	dng	5	5	1
FieldData\Smithsonian Pictures\NOVA-DC-MD\Juvenile\16229	6	PXL_20230201_185526644.dng	1080	PXL_20230201_185526644	dng	6	6	1
FieldData\Smithsonian Pictures\NOVA-DC-MD\Juvenile\16229	7	PXL_20230201_185536228.dng	1081	PXL_20230201_185536228	dng	7	7	1
FieldData\Smithsonian Pictures\NOVA-DC-MD\Juvenile\16229	8	PXL_20230201_185536823.dng	1082	PXL_20230201_185536823	dng	8	8	1
FieldData\Smithsonian Pictures\NOVA-DC-MD\Juvenile\16229	9	PXL_20230201_185544236.dng	1083	PXL_20230201_185544236	dng	9	9	1
FieldData\Smithsonian Pictures\NOVA-DC-MD\Juvenile\16229	10	PXL_20230201_185545256.dng	1084	PXL_20230201_185545256	dng	10	10	1
FieldData\Smithsonian Pictures\NOVA-DC-MD\Juvenile\17014	1	PXL_20230201_184948167.dng	1085	PXL_20230201_184948167	dng	1	1	1
FieldData\Smithsonian Pictures\NOVA-DC-MD\Juvenile\17014	2	PXL_20230201_184951256.dng	1086	PXL_20230201_184951256	dng	2	2	1
FieldData\Smithsonian Pictures\NOVA-DC-MD\Juvenile\17014	3	PXL_20230201_185008006.dng	1087	PXL_20230201_185008006	dng	3	3	1
FieldData\Smithsonian Pictures\NOVA-DC-MD\Juvenile\17014	4	PXL_20230201_185008897.dng	1088	PXL_20230201_185008897	dng	4	4	1
FieldData\Smithsonian Pictures\NOVA-DC-MD\Juvenile\17014	5	PXL_20230201_185017411.dng	1089	PXL_20230201_185017411	dng	5	5	1
FieldData\Smithsonian Pictures\NOVA-DC-MD\Juvenile\17014	6	PXL_20230201_185018143.dng	1090	PXL_20230201_185018143	dng	6	6	1
FieldData\Smithsonian Pictures\NOVA-DC-MD\Juvenile\17014	7	PXL_20230201_185024938.dng	1091	PXL_20230201_185024938	dng	7	7	1
FieldData\Smithsonian Pictures\NOVA-DC-MD\Juvenile\17014	8	PXL_20230201_185025549.dng	1092	PXL_20230201_185025549	dng	8	8	1
FieldData\Smithsonian Pictures\NOVA-DC-MD\Juvenile\17014	9	PXL_20230201_185033035.dng	1093	PXL_20230201_185033035	dng	9	9	1
FieldData\Smithsonian Pictures\NOVA-DC-MD\Juvenile\17014	10	PXL_20230201_185033831.dng	1094	PXL_20230201_185033831	dng	10	10	1
FieldData\Smithsonian Pictures\NOVA-DC-MD\Juvenile\17375	1	PXL_20230201_190150085.dng	1095	PXL_20230201_190150085	dng	1	1	1
FieldData\Smithsonian Pictures\NOVA-DC-MD\Juvenile\17375	2	PXL_20230201_190205664.dng	1096	PXL_20230201_190205664	dng	2	2	1
FieldData\Smithsonian Pictures\NOVA-DC-MD\Juvenile\17375	3	PXL_20230201_190224816.dng	1097	PXL_20230201_190224816	dng	3	3	1
FieldData\Smithsonian Pictures\NOVA-DC-MD\Juvenile\17375	4	PXL_20230201_190225636.dng	1098	PXL_20230201_190225636	dng	4	4	1
FieldData\Smithsonian Pictures\NOVA-DC-MD\Juvenile\17375	5	PXL_20230201_190235215.dng	1099	PXL_20230201_190235215	dng	5	5	1
FieldData\Smithsonian Pictures\NOVA-DC-MD\Juvenile\17375	6	PXL_20230201_190235877.dng	1100	PXL_20230201_190235877	dng	6	6	1
FieldData\Smithsonian Pictures\NOVA-DC-MD\Juvenile\17375	7	PXL_20230201_190252640.dng	1101	PXL_20230201_190252640	dng	7	7	1
FieldData\Smithsonian Pictures\NOVA-DC-MD\Juvenile\17375	8	PXL_20230201_190253375.dng	1102	PXL_20230201_190253375	dng	8	8	1
FieldData\Smithsonian Pictures\NOVA-DC-MD\Juvenile\17375	9	PXL_20230201_190307354.dng	1103	PXL_20230201_190307354	dng	9	9	1
FieldData\Smithsonian Pictures\NOVA-DC-MD\Juvenile\17375	10	PXL_20230201_190307935.dng	1104	PXL_20230201_190307935	dng	10	10	1
FieldData\Smithsonian Pictures\NOVA-DC-MD\Juvenile\17461	1	PXL_20230201_190810450.dng	1105	PXL_20230201_190810450	dng	1	1	1
FieldData\Smithsonian Pictures\NOVA-DC-MD\Juvenile\17461	2	PXL_20230201_190815759.dng	1106	PXL_20230201_190815759	dng	2	2	1
FieldData\Smithsonian Pictures\NOVA-DC-MD\Juvenile\17461	3	PXL_20230201_190837987.dng	1107	PXL_20230201_190837987	dng	3	3	1
FieldData\Smithsonian Pictures\NOVA-DC-MD\Juvenile\17461	4	PXL_20230201_190838696.dng	1108	PXL_20230201_190838696	dng	4	4	1
FieldData\Smithsonian Pictures\NOVA-DC-MD\Juvenile\17461	5	PXL_20230201_190849544.dng	1109	PXL_20230201_190849544	dng	5	5	1
FieldData\Smithsonian Pictures\NOVA-DC-MD\Juvenile\17461	6	PXL_20230201_190850915.dng	1110	PXL_20230201_190850915	dng	6	6	1
FieldData\Smithsonian Pictures\NOVA-DC-MD\Juvenile\17461	7	PXL_20230201_190859438.dng	1111	PXL_20230201_190859438	dng	7	7	1
FieldData\Smithsonian Pictures\NOVA-DC-MD\Juvenile\17461	8	PXL_20230201_190900667.dng	1112	PXL_20230201_190900667	dng	8	8	1
FieldData\Smithsonian Pictures\NOVA-DC-MD\Juvenile\17461	9	PXL_20230201_190906927.dng	1113	PXL_20230201_190906927	dng	9	9	1
FieldData\Smithsonian Pictures\NOVA-DC-MD\Juvenile\17461	10	PXL_20230201_190907735.dng	1114	PXL_20230201_190907735	dng	10	10	1
FieldData\Smithsonian Pictures\NOVA-DC-MD\Juvenile\19036	1	PXL_20230201_192352577.dng	1125	PXL_20230201_192352577	dng	1	1	1
FieldData\Smithsonian Pictures\NOVA-DC-MD\Juvenile\19036	2	PXL_20230201_192355370.dng	1126	PXL_20230201_192355370	dng	2	2	1
FieldData\Smithsonian Pictures\NOVA-DC-MD\Juvenile\19036	3	PXL_20230201_192404028.dng	1127	PXL_20230201_192404028	dng	3	3	1
FieldData\Smithsonian Pictures\NOVA-DC-MD\Juvenile\19036	4	PXL_20230201_192404660.dng	1128	PXL_20230201_192404660	dng	4	4	1
FieldData\Smithsonian Pictures\NOVA-DC-MD\Juvenile\19036	5	PXL_20230201_192411073.dng	1129	PXL_20230201_192411073	dng	5	5	1
FieldData\Smithsonian Pictures\NOVA-DC-MD\Juvenile\19036	6	PXL_20230201_192411840.dng	1130	PXL_20230201_192411840	dng	6	6	1
FieldData\Smithsonian Pictures\NOVA-DC-MD\Juvenile\19036	7	PXL_20230201_192419583.dng	1131	PXL_20230201_192419583	dng	7	7	1
FieldData\Smithsonian Pictures\NOVA-DC-MD\Juvenile\19036	8	PXL_20230201_192420345.dng	1132	PXL_20230201_192420345	dng	8	8	1
FieldData\Smithsonian Pictures\NOVA-DC-MD\Juvenile\19036	9	PXL_20230201_192428110.dng	1133	PXL_20230201_192428110	dng	9	9	1
FieldData\Smithsonian Pictures\NOVA-DC-MD\Juvenile\19036	10	PXL_20230201_192428749.dng	1134	PXL_20230201_192428749	dng	10	10	1
FieldData\Smithsonian Pictures\NOVA-DC-MD\Juvenile\22290	1	PXL_20230201_194418792.dng	1135	PXL_20230201_194418792	dng	1	1	1
FieldData\Smithsonian Pictures\NOVA-DC-MD\Juvenile\22290	2	PXL_20230201_194421617.dng	1136	PXL_20230201_194421617	dng	2	2	1
FieldData\Smithsonian Pictures\NOVA-DC-MD\Juvenile\22290	3	PXL_20230201_194432206.dng	1137	PXL_20230201_194432206	dng	3	3	1
FieldData\Smithsonian Pictures\NOVA-DC-MD\Juvenile\22290	4	PXL_20230201_194433049.dng	1138	PXL_20230201_194433049	dng	4	4	1
FieldData\Smithsonian Pictures\NOVA-DC-MD\Juvenile\22290	5	PXL_20230201_194440314.dng	1139	PXL_20230201_194440314	dng	5	5	1
FieldData\Smithsonian Pictures\NOVA-DC-MD\Juvenile\22290	6	PXL_20230201_194440976.dng	1140	PXL_20230201_194440976	dng	6	6	1
FieldData\Smithsonian Pictures\NOVA-DC-MD\Juvenile\22290	7	PXL_20230201_194447798.dng	1141	PXL_20230201_194447798	dng	7	7	1
FieldData\Smithsonian Pictures\NOVA-DC-MD\Juvenile\22290	8	PXL_20230201_194448411.dng	1142	PXL_20230201_194448411	dng	8	8	1
FieldData\Smithsonian Pictures\NOVA-DC-MD\Juvenile\22290	9	PXL_20230201_194455087.dng	1143	PXL_20230201_194455087	dng	9	9	1
FieldData\Smithsonian Pictures\NOVA-DC-MD\Juvenile\22290	10	PXL_20230201_194455728.dng	1144	PXL_20230201_194455728	dng	10	10	1
FieldData\Smithsonian Pictures\NOVA-DC-MD\Juvenile\22291	1	PXL_20230201_194028310.dng	1145	PXL_20230201_194028310	dng	1	1	1
FieldData\Smithsonian Pictures\NOVA-DC-MD\Juvenile\22291	2	PXL_20230201_194030621.dng	1146	PXL_20230201_194030621	dng	2	2	1
FieldData\Smithsonian Pictures\NOVA-DC-MD\Juvenile\22291	3	PXL_20230201_194045175.dng	1147	PXL_20230201_194045175	dng	3	3	1
FieldData\Smithsonian Pictures\NOVA-DC-MD\Juvenile\22291	4	PXL_20230201_194046015.dng	1148	PXL_20230201_194046015	dng	4	4	1
FieldData\Smithsonian Pictures\NOVA-DC-MD\Juvenile\22291	5	PXL_20230201_194058957.dng	1149	PXL_20230201_194058957	dng	5	5	1
FieldData\Smithsonian Pictures\NOVA-DC-MD\Juvenile\22291	6	PXL_20230201_194100139.dng	1150	PXL_20230201_194100139	dng	6	6	1
FieldData\Smithsonian Pictures\NOVA-DC-MD\Juvenile\22291	7	PXL_20230201_194112757.dng	1151	PXL_20230201_194112757	dng	7	7	1
FieldData\Smithsonian Pictures\NOVA-DC-MD\Juvenile\22291	8	PXL_20230201_194113533.dng	1152	PXL_20230201_194113533	dng	8	8	1
FieldData\Smithsonian Pictures\NOVA-DC-MD\Juvenile\22291	9	PXL_20230201_194121902.dng	1153	PXL_20230201_194121902	dng	9	9	1
FieldData\Smithsonian Pictures\NOVA-DC-MD\Juvenile\22291	10	PXL_20230201_194122875.dng	1154	PXL_20230201_194122875	dng	10	10	1
FieldData\Smithsonian Pictures\NOVA-DC-MD\Juvenile\22465	1	PXL_20230201_200721168.dng	1155	PXL_20230201_200721168	dng	1	1	1
FieldData\Smithsonian Pictures\NOVA-DC-MD\Juvenile\22465	2	PXL_20230201_200723765.dng	1156	PXL_20230201_200723765	dng	2	2	1
FieldData\Smithsonian Pictures\NOVA-DC-MD\Juvenile\22465	3	PXL_20230201_200737939.dng	1157	PXL_20230201_200737939	dng	3	3	1
FieldData\Smithsonian Pictures\NOVA-DC-MD\Juvenile\22465	4	PXL_20230201_200738596.dng	1158	PXL_20230201_200738596	dng	4	4	1
FieldData\Smithsonian Pictures\NOVA-DC-MD\Juvenile\22465	5	PXL_20230201_200749463.dng	1159	PXL_20230201_200749463	dng	5	5	1
FieldData\Smithsonian Pictures\NOVA-DC-MD\Juvenile\22465	6	PXL_20230201_200750053.dng	1160	PXL_20230201_200750053	dng	6	6	1
FieldData\Smithsonian Pictures\NOVA-DC-MD\Juvenile\22465	7	PXL_20230201_200800698.dng	1161	PXL_20230201_200800698	dng	7	7	1
FieldData\Smithsonian Pictures\NOVA-DC-MD\Juvenile\22465	8	PXL_20230201_200801876.dng	1162	PXL_20230201_200801876	dng	8	8	1
FieldData\Smithsonian Pictures\NOVA-DC-MD\Juvenile\22465	9	PXL_20230201_200812208.dng	1163	PXL_20230201_200812208	dng	9	9	1
FieldData\Smithsonian Pictures\NOVA-DC-MD\Juvenile\22465	10	PXL_20230201_200812994.dng	1164	PXL_20230201_200812994	dng	10	10	1
FieldData\Smithsonian Pictures\NOVA-DC-MD\Juvenile\230328	1	PXL_20230131_204012746.dng	1165	PXL_20230131_204012746	dng	1	1	1
FieldData\Smithsonian Pictures\NOVA-DC-MD\Juvenile\230328	2	PXL_20230131_204014212.dng	1166	PXL_20230131_204014212	dng	2	2	1
FieldData\Smithsonian Pictures\NOVA-DC-MD\Juvenile\230328	3	PXL_20230131_204029672.dng	1167	PXL_20230131_204029672	dng	3	3	1
FieldData\Smithsonian Pictures\NOVA-DC-MD\Juvenile\230328	4	PXL_20230131_204030809.dng	1168	PXL_20230131_204030809	dng	4	4	1
FieldData\Smithsonian Pictures\NOVA-DC-MD\Juvenile\230328	5	PXL_20230131_204038543.dng	1169	PXL_20230131_204038543	dng	5	5	1
FieldData\Smithsonian Pictures\NOVA-DC-MD\Juvenile\230328	6	PXL_20230131_204039744.dng	1170	PXL_20230131_204039744	dng	6	6	1
FieldData\Smithsonian Pictures\NOVA-DC-MD\Juvenile\230328	7	PXL_20230131_204047774.dng	1171	PXL_20230131_204047774	dng	7	7	1
FieldData\Smithsonian Pictures\NOVA-DC-MD\Juvenile\230328	8	PXL_20230131_204048887.dng	1172	PXL_20230131_204048887	dng	8	8	1
FieldData\Smithsonian Pictures\NOVA-DC-MD\Juvenile\230328	9	PXL_20230131_204055996.dng	1173	PXL_20230131_204055996	dng	9	9	1
FieldData\Smithsonian Pictures\NOVA-DC-MD\Juvenile\230328	10	PXL_20230131_204056951.dng	1174	PXL_20230131_204056951	dng	10	10	1
FieldData\Smithsonian Pictures\NOVA-DC-MD\Juvenile\26172	1	PXL_20230201_204511533.dng	1175	PXL_20230201_204511533	dng	1	1	1
FieldData\Smithsonian Pictures\NOVA-DC-MD\Juvenile\26172	2	PXL_20230201_204514821.dng	1176	PXL_20230201_204514821	dng	2	2	1
FieldData\Smithsonian Pictures\NOVA-DC-MD\Juvenile\26172	3	PXL_20230201_204528072.dng	1177	PXL_20230201_204528072	dng	3	3	1
FieldData\Smithsonian Pictures\NOVA-DC-MD\Juvenile\26172	4	PXL_20230201_204528838.dng	1178	PXL_20230201_204528838	dng	4	4	1
FieldData\Smithsonian Pictures\NOVA-DC-MD\Juvenile\26172	5	PXL_20230201_204536533.dng	1179	PXL_20230201_204536533	dng	5	5	1
FieldData\Smithsonian Pictures\NOVA-DC-MD\Juvenile\26172	6	PXL_20230201_204537240.dng	1180	PXL_20230201_204537240	dng	6	6	1
FieldData\Smithsonian Pictures\NOVA-DC-MD\Juvenile\26172	7	PXL_20230201_204544946.dng	1181	PXL_20230201_204544946	dng	7	7	1
FieldData\Smithsonian Pictures\NOVA-DC-MD\Juvenile\26172	8	PXL_20230201_204545512.dng	1182	PXL_20230201_204545512	dng	8	8	1
FieldData\Smithsonian Pictures\NOVA-DC-MD\Juvenile\26172	9	PXL_20230201_204553019.dng	1183	PXL_20230201_204553019	dng	9	9	1
FieldData\Smithsonian Pictures\NOVA-DC-MD\Juvenile\26172	10	PXL_20230201_204553713.dng	1184	PXL_20230201_204553713	dng	10	10	1
FieldData\Smithsonian Pictures\NOVA-DC-MD\Juvenile\26173	1	PXL_20230201_204511533.dng	1185	PXL_20230201_204511533	dng	1	1	1
FieldData\Smithsonian Pictures\NOVA-DC-MD\Juvenile\26173	2	PXL_20230201_204514821.dng	1186	PXL_20230201_204514821	dng	2	2	1
FieldData\Smithsonian Pictures\NOVA-DC-MD\Juvenile\26173	3	PXL_20230201_204528072.dng	1187	PXL_20230201_204528072	dng	3	3	1
FieldData\Smithsonian Pictures\NOVA-DC-MD\Juvenile\26173	4	PXL_20230201_204536533.dng	1188	PXL_20230201_204536533	dng	4	4	1
FieldData\Smithsonian Pictures\NOVA-DC-MD\Juvenile\26173	5	PXL_20230201_204537240.dng	1189	PXL_20230201_204537240	dng	5	5	1
FieldData\Smithsonian Pictures\NOVA-DC-MD\Juvenile\26173	6	PXL_20230201_204544946.dng	1190	PXL_20230201_204544946	dng	6	6	1
FieldData\Smithsonian Pictures\NOVA-DC-MD\Juvenile\26173	7	PXL_20230201_204545512.dng	1191	PXL_20230201_204545512	dng	7	7	1
FieldData\Smithsonian Pictures\NOVA-DC-MD\Juvenile\26173	8	PXL_20230201_204553019.dng	1192	PXL_20230201_204553019	dng	8	8	1
FieldData\Smithsonian Pictures\NOVA-DC-MD\Juvenile\26173	9	PXL_20230201_204553713.dng	1193	PXL_20230201_204553713	dng	9	9	1
FieldData\Smithsonian Pictures\NOVA-DC-MD\Juvenile\374959	1	PXL_20230208_195340167.dng	1194	PXL_20230208_195340167	dng	1	1	1
FieldData\Smithsonian Pictures\NOVA-DC-MD\Juvenile\374959	2	PXL_20230208_195343081.dng	1195	PXL_20230208_195343081	dng	2	2	1
FieldData\Smithsonian Pictures\NOVA-DC-MD\Juvenile\374959	3	PXL_20230208_195345123.dng	1196	PXL_20230208_195345123	dng	3	3	1
FieldData\Smithsonian Pictures\NOVA-DC-MD\Juvenile\374959	4	PXL_20230208_195357132.dng	1197	PXL_20230208_195357132	dng	4	4	1
FieldData\Smithsonian Pictures\NOVA-DC-MD\Juvenile\374959	5	PXL_20230208_195358120.dng	1198	PXL_20230208_195358120	dng	5	5	1
FieldData\Smithsonian Pictures\NOVA-DC-MD\Juvenile\374959	6	PXL_20230208_195408817.dng	1199	PXL_20230208_195408817	dng	6	6	1
FieldData\Smithsonian Pictures\NOVA-DC-MD\Juvenile\374959	7	PXL_20230208_195409876.dng	1200	PXL_20230208_195409876	dng	7	7	1
FieldData\Smithsonian Pictures\NOVA-DC-MD\Juvenile\374959	8	PXL_20230208_195420277.dng	1201	PXL_20230208_195420277	dng	8	8	1
FieldData\Smithsonian Pictures\NOVA-DC-MD\Juvenile\374959	9	PXL_20230208_195421042.dng	1202	PXL_20230208_195421042	dng	9	9	1
FieldData\Smithsonian Pictures\NOVA-DC-MD\Juvenile\374959	10	PXL_20230208_195431206.dng	1203	PXL_20230208_195431206	dng	10	10	1
FieldData\Smithsonian Pictures\NOVA-DC-MD\Juvenile\374959	11	PXL_20230208_195432405.dng	1204	PXL_20230208_195432405	dng	11	11	1
FieldData\Smithsonian Pictures\NOVA-DC-MD\Juvenile\37783	1	PXL_20230201_205820085.dng	1205	PXL_20230201_205820085	dng	1	1	1
FieldData\Smithsonian Pictures\NOVA-DC-MD\Juvenile\37783	2	PXL_20230201_205821801.dng	1206	PXL_20230201_205821801	dng	2	2	1
FieldData\Smithsonian Pictures\NOVA-DC-MD\Juvenile\37783	3	PXL_20230201_205844316.dng	1207	PXL_20230201_205844316	dng	3	3	1
FieldData\Smithsonian Pictures\NOVA-DC-MD\Juvenile\37783	4	PXL_20230201_205845359.dng	1208	PXL_20230201_205845359	dng	4	4	1
FieldData\Smithsonian Pictures\NOVA-DC-MD\Juvenile\37783	5	PXL_20230201_205900473.dng	1209	PXL_20230201_205900473	dng	5	5	1
FieldData\Smithsonian Pictures\NOVA-DC-MD\Juvenile\37783	6	PXL_20230201_205901059.dng	1210	PXL_20230201_205901059	dng	6	6	1
FieldData\Smithsonian Pictures\NOVA-DC-MD\Juvenile\37783	7	PXL_20230201_205908834.dng	1211	PXL_20230201_205908834	dng	7	7	1
FieldData\Smithsonian Pictures\NOVA-DC-MD\Juvenile\37783	8	PXL_20230201_205909352.dng	1212	PXL_20230201_205909352	dng	8	8	1
FieldData\Smithsonian Pictures\NOVA-DC-MD\Juvenile\37783	9	PXL_20230201_205919157.dng	1213	PXL_20230201_205919157	dng	9	9	1
FieldData\Smithsonian Pictures\NOVA-DC-MD\Juvenile\37783	10	PXL_20230201_205920233.dng	1214	PXL_20230201_205920233	dng	10	10	1
FieldData\Smithsonian Pictures\NOVA-DC-MD\Juvenile\38891	1	PXL_20230214_183108609.dng	1215	PXL_20230214_183108609	dng	1	1	1
FieldData\Smithsonian Pictures\NOVA-DC-MD\Juvenile\38891	2	PXL_20230214_183110879.dng	1216	PXL_20230214_183110879	dng	2	2	1
FieldData\Smithsonian Pictures\NOVA-DC-MD\Juvenile\38891	3	PXL_20230214_183112588.dng	1217	PXL_20230214_183112588	dng	3	3	1
FieldData\Smithsonian Pictures\NOVA-DC-MD\Juvenile\38891	4	PXL_20230214_183149533.dng	1218	PXL_20230214_183149533	dng	4	4	1
FieldData\Smithsonian Pictures\NOVA-DC-MD\Juvenile\38891	5	PXL_20230214_183150479.dng	1219	PXL_20230214_183150479	dng	5	5	1
FieldData\Smithsonian Pictures\NOVA-DC-MD\Juvenile\38891	6	PXL_20230214_183158336.dng	1220	PXL_20230214_183158336	dng	6	6	1
FieldData\Smithsonian Pictures\NOVA-DC-MD\Juvenile\38891	7	PXL_20230214_183159107.dng	1221	PXL_20230214_183159107	dng	7	7	1
FieldData\Smithsonian Pictures\NOVA-DC-MD\Juvenile\38891	8	PXL_20230214_183215599.dng	1222	PXL_20230214_183215599	dng	8	8	1
FieldData\Smithsonian Pictures\NOVA-DC-MD\Juvenile\38891	9	PXL_20230214_183216348.dng	1223	PXL_20230214_183216348	dng	9	9	1
FieldData\Smithsonian Pictures\NOVA-DC-MD\Juvenile\38891	10	PXL_20230214_183229940.dng	1224	PXL_20230214_183229940	dng	10	10	1
FieldData\Smithsonian Pictures\NOVA-DC-MD\Juvenile\38891	11	PXL_20230214_183231070.dng	1225	PXL_20230214_183231070	dng	11	11	1
FieldData\Smithsonian Pictures\NOVA-DC-MD\Juvenile\38892	1	PXL_20230214_182848686.dng	1226	PXL_20230214_182848686	dng	1	1	1
FieldData\Smithsonian Pictures\NOVA-DC-MD\Juvenile\38892	2	PXL_20230214_182851966.dng	1227	PXL_20230214_182851966	dng	2	2	1
FieldData\Smithsonian Pictures\NOVA-DC-MD\Juvenile\38892	3	PXL_20230214_182853221.dng	1228	PXL_20230214_182853221	dng	3	3	1
FieldData\Smithsonian Pictures\NOVA-DC-MD\Juvenile\38892	4	PXL_20230214_182912298.dng	1229	PXL_20230214_182912298	dng	4	4	1
FieldData\Smithsonian Pictures\NOVA-DC-MD\Juvenile\38892	5	PXL_20230214_182913106.dng	1230	PXL_20230214_182913106	dng	5	5	1
FieldData\Smithsonian Pictures\NOVA-DC-MD\Juvenile\38892	6	PXL_20230214_182926485.dng	1231	PXL_20230214_182926485	dng	6	6	1
FieldData\Smithsonian Pictures\NOVA-DC-MD\Juvenile\38892	7	PXL_20230214_182927078.dng	1232	PXL_20230214_182927078	dng	7	7	1
FieldData\Smithsonian Pictures\NOVA-DC-MD\Juvenile\38892	8	PXL_20230214_182945520.dng	1233	PXL_20230214_182945520	dng	8	8	1
FieldData\Smithsonian Pictures\NOVA-DC-MD\Juvenile\38892	9	PXL_20230214_182946313.dng	1234	PXL_20230214_182946313	dng	9	9	1
FieldData\Smithsonian Pictures\NOVA-DC-MD\Juvenile\38892	10	PXL_20230214_183002142.dng	1235	PXL_20230214_183002142	dng	10	10	1
FieldData\Smithsonian Pictures\NOVA-DC-MD\Juvenile\38892	11	PXL_20230214_183004377.dng	1236	PXL_20230214_183004377	dng	11	11	1
FieldData\Smithsonian Pictures\NOVA-DC-MD\Juvenile\45780	1	PXL_20230125_192823113.dng	1237	PXL_20230125_192823113	dng	1	1	1
FieldData\Smithsonian Pictures\NOVA-DC-MD\Juvenile\45780	2	PXL_20230125_192825451.dng	1238	PXL_20230125_192825451	dng	2	2	1
FieldData\Smithsonian Pictures\NOVA-DC-MD\Juvenile\45780	3	PXL_20230125_192839875.dng	1239	PXL_20230125_192839875	dng	3	3	1
FieldData\Smithsonian Pictures\NOVA-DC-MD\Juvenile\45780	4	PXL_20230125_192840832.dng	1240	PXL_20230125_192840832	dng	4	4	1
FieldData\Smithsonian Pictures\NOVA-DC-MD\Juvenile\45780	5	PXL_20230125_192849137.dng	1241	PXL_20230125_192849137	dng	5	5	1
FieldData\Smithsonian Pictures\NOVA-DC-MD\Juvenile\45780	6	PXL_20230125_192849939.dng	1242	PXL_20230125_192849939	dng	6	6	1
FieldData\Smithsonian Pictures\NOVA-DC-MD\Juvenile\45780	7	PXL_20230125_192902121.dng	1243	PXL_20230125_192902121	dng	7	7	1
FieldData\Smithsonian Pictures\NOVA-DC-MD\Juvenile\45780	8	PXL_20230125_192902907.dng	1244	PXL_20230125_192902907	dng	8	8	1
FieldData\Smithsonian Pictures\NOVA-DC-MD\Juvenile\45780	9	PXL_20230125_192913379.dng	1245	PXL_20230125_192913379	dng	9	9	1
FieldData\Smithsonian Pictures\NOVA-DC-MD\Juvenile\45780	10	PXL_20230125_192914078.dng	1246	PXL_20230125_192914078	dng	10	10	1
FieldData\Smithsonian Pictures\NOVA-DC-MD\Juvenile\45781	1	PXL_20230125_192422408.dng	1247	PXL_20230125_192422408	dng	1	1	1
FieldData\Smithsonian Pictures\NOVA-DC-MD\Juvenile\45781	2	PXL_20230125_192424035.dng	1248	PXL_20230125_192424035	dng	2	2	1
FieldData\Smithsonian Pictures\NOVA-DC-MD\Juvenile\45781	3	PXL_20230125_192436360.dng	1249	PXL_20230125_192436360	dng	3	3	1
FieldData\Smithsonian Pictures\NOVA-DC-MD\Juvenile\45781	4	PXL_20230125_192438526.dng	1250	PXL_20230125_192438526	dng	4	4	1
FieldData\Smithsonian Pictures\NOVA-DC-MD\Juvenile\45781	5	PXL_20230125_192448316.dng	1251	PXL_20230125_192448316	dng	5	5	1
FieldData\Smithsonian Pictures\NOVA-DC-MD\Juvenile\45781	6	PXL_20230125_192449133.dng	1252	PXL_20230125_192449133	dng	6	6	1
FieldData\Smithsonian Pictures\NOVA-DC-MD\Juvenile\45781	7	PXL_20230125_192457695.dng	1253	PXL_20230125_192457695	dng	7	7	1
FieldData\Smithsonian Pictures\NOVA-DC-MD\Juvenile\45781	8	PXL_20230125_192458393.dng	1254	PXL_20230125_192458393	dng	8	8	1
FieldData\Smithsonian Pictures\NOVA-DC-MD\Juvenile\45781	9	PXL_20230125_192506652.dng	1255	PXL_20230125_192506652	dng	9	9	1
FieldData\Smithsonian Pictures\NOVA-DC-MD\Juvenile\45781	10	PXL_20230125_192507440.dng	1256	PXL_20230125_192507440	dng	10	10	1
FieldData\Smithsonian Pictures\NOVA-DC-MD\Juvenile\48676	1	PXL_20230125_193420719.dng	1257	PXL_20230125_193420719	dng	1	1	1
FieldData\Smithsonian Pictures\NOVA-DC-MD\Juvenile\48676	2	PXL_20230125_193421768.dng	1258	PXL_20230125_193421768	dng	2	2	1
FieldData\Smithsonian Pictures\NOVA-DC-MD\Juvenile\48676	3	PXL_20230125_193441838.dng	1259	PXL_20230125_193441838	dng	3	3	1
FieldData\Smithsonian Pictures\NOVA-DC-MD\Juvenile\48676	4	PXL_20230125_193443686.dng	1260	PXL_20230125_193443686	dng	4	4	1
FieldData\Smithsonian Pictures\NOVA-DC-MD\Juvenile\48676	5	PXL_20230125_193457383.dng	1261	PXL_20230125_193457383	dng	5	5	1
FieldData\Smithsonian Pictures\NOVA-DC-MD\Juvenile\48676	6	PXL_20230125_193458204.dng	1262	PXL_20230125_193458204	dng	6	6	1
FieldData\Smithsonian Pictures\NOVA-DC-MD\Juvenile\48676	7	PXL_20230125_193508835.dng	1263	PXL_20230125_193508835	dng	7	7	1
FieldData\Smithsonian Pictures\NOVA-DC-MD\Juvenile\48676	8	PXL_20230125_193509617.dng	1264	PXL_20230125_193509617	dng	8	8	1
FieldData\Smithsonian Pictures\NOVA-DC-MD\Juvenile\48676	9	PXL_20230125_193527146.dng	1265	PXL_20230125_193527146	dng	9	9	1
FieldData\Smithsonian Pictures\NOVA-DC-MD\Juvenile\48676	10	PXL_20230125_193528158.dng	1266	PXL_20230125_193528158	dng	10	10	1
FieldData\Smithsonian Pictures\NOVA-DC-MD\Juvenile\49960	1	PXL_20230125_194731802.dng	1267	PXL_20230125_194731802	dng	1	1	1
FieldData\Smithsonian Pictures\NOVA-DC-MD\Juvenile\49960	2	PXL_20230125_194732699.dng	1268	PXL_20230125_194732699	dng	2	2	1
FieldData\Smithsonian Pictures\NOVA-DC-MD\Juvenile\49960	3	PXL_20230125_194747062.dng	1269	PXL_20230125_194747062	dng	3	3	1
FieldData\Smithsonian Pictures\NOVA-DC-MD\Juvenile\49960	4	PXL_20230125_194748384.dng	1270	PXL_20230125_194748384	dng	4	4	1
FieldData\Smithsonian Pictures\NOVA-DC-MD\Juvenile\49960	5	PXL_20230125_194802004.dng	1271	PXL_20230125_194802004	dng	5	5	1
FieldData\Smithsonian Pictures\NOVA-DC-MD\Juvenile\49960	6	PXL_20230125_194802938.dng	1272	PXL_20230125_194802938	dng	6	6	1
FieldData\Smithsonian Pictures\NOVA-DC-MD\Juvenile\49960	7	PXL_20230125_194810953.dng	1273	PXL_20230125_194810953	dng	7	7	1
FieldData\Smithsonian Pictures\NOVA-DC-MD\Juvenile\49960	8	PXL_20230125_194811691.dng	1274	PXL_20230125_194811691	dng	8	8	1
FieldData\Smithsonian Pictures\NOVA-DC-MD\Juvenile\49960	9	PXL_20230125_194824836.dng	1275	PXL_20230125_194824836	dng	9	9	1
FieldData\Smithsonian Pictures\NOVA-DC-MD\Juvenile\49960	10	PXL_20230125_194825592.dng	1276	PXL_20230125_194825592	dng	10	10	1
FieldData\Smithsonian Pictures\NOVA-DC-MD\Juvenile\54749	1	PXL_20230125_200134995.dng	1277	PXL_20230125_200134995	dng	1	1	1
FieldData\Smithsonian Pictures\NOVA-DC-MD\Juvenile\54749	2	PXL_20230125_200135907.dng	1278	PXL_20230125_200135907	dng	2	2	1
FieldData\Smithsonian Pictures\NOVA-DC-MD\Juvenile\54749	3	PXL_20230125_200158178.dng	1279	PXL_20230125_200158178	dng	3	3	1
FieldData\Smithsonian Pictures\NOVA-DC-MD\Juvenile\54749	4	PXL_20230125_200159107.dng	1280	PXL_20230125_200159107	dng	4	4	1
FieldData\Smithsonian Pictures\NOVA-DC-MD\Juvenile\54749	5	PXL_20230125_200208349.dng	1281	PXL_20230125_200208349	dng	5	5	1
FieldData\Smithsonian Pictures\NOVA-DC-MD\Juvenile\54749	6	PXL_20230125_200209136.dng	1282	PXL_20230125_200209136	dng	6	6	1
FieldData\Smithsonian Pictures\NOVA-DC-MD\Juvenile\54749	7	PXL_20230125_200217530.dng	1283	PXL_20230125_200217530	dng	7	7	1
FieldData\Smithsonian Pictures\NOVA-DC-MD\Juvenile\54749	8	PXL_20230125_200218118.dng	1284	PXL_20230125_200218118	dng	8	8	1
FieldData\Smithsonian Pictures\NOVA-DC-MD\Juvenile\54749	9	PXL_20230125_200227966.dng	1285	PXL_20230125_200227966	dng	9	9	1
FieldData\Smithsonian Pictures\NOVA-DC-MD\Juvenile\54749	10	PXL_20230125_200229472.dng	1286	PXL_20230125_200229472	dng	10	10	1
FieldData\Smithsonian Pictures\NOVA-DC-MD\Juvenile\54750	1	PXL_20230125_200654568.dng	1287	PXL_20230125_200654568	dng	4	1	0
FieldData\Smithsonian Pictures\NOVA-DC-MD\Juvenile\54750	2	PXL_20230207_205338957.dng	1288	PXL_20230207_205338957	dng	5	2	0
FieldData\Smithsonian Pictures\NOVA-DC-MD\Juvenile\54750	3	PXL_20230207_205339822.dng	1289	PXL_20230207_205339822	dng	6	3	0
FieldData\Smithsonian Pictures\NOVA-DC-MD\Juvenile\54750	4	PXL_20230207_205421955.dng	1290	PXL_20230207_205421955	dng	7	4	0
FieldData\Smithsonian Pictures\NOVA-DC-MD\Juvenile\54750	5	PXL_20230207_205422591.dng	1291	PXL_20230207_205422591	dng	8	5	0
FieldData\Smithsonian Pictures\NOVA-DC-MD\Juvenile\54750	6	PXL_20230207_205437590.dng	1292	PXL_20230207_205437590	dng	9	6	0
FieldData\Smithsonian Pictures\NOVA-DC-MD\Juvenile\54750	7	PXL_20230207_205438431.dng	1293	PXL_20230207_205438431	dng	10	7	0
FieldData\Smithsonian Pictures\NOVA-DC-MD\Juvenile\54750	8	aPXL_20230207_205316926.dng	1294	aPXL_20230207_205316926	dng	1	8	0
FieldData\Smithsonian Pictures\NOVA-DC-MD\Juvenile\54750	9	aPXL_20230207_205321137.dng	1295	aPXL_20230207_205321137	dng	2	9	0
FieldData\Smithsonian Pictures\NOVA-DC-MD\Juvenile\54750	10	bPXL_20230207_205409728.dng	1296	bPXL_20230207_205409728	dng	3	10	0
FieldData\Smithsonian Pictures\NOVA-DC-MD\Juvenile\54751	1	PXL_20230125_201120820(1).dng	1297	PXL_20230125_201120820(1)	dng	1	1	1
FieldData\Smithsonian Pictures\NOVA-DC-MD\Juvenile\54751	2	PXL_20230125_201120820.dng	1298	PXL_20230125_201120820	dng	2	2	1
FieldData\Smithsonian Pictures\NOVA-DC-MD\Juvenile\54751	3	PXL_20230125_201121995.dng	1299	PXL_20230125_201121995	dng	3	3	1
FieldData\Smithsonian Pictures\NOVA-DC-MD\Juvenile\54751	4	PXL_20230125_201138425.dng	1300	PXL_20230125_201138425	dng	4	4	1
FieldData\Smithsonian Pictures\NOVA-DC-MD\Juvenile\54751	5	PXL_20230125_201139683.dng	1301	PXL_20230125_201139683	dng	5	5	1
FieldData\Smithsonian Pictures\NOVA-DC-MD\Juvenile\54751	6	PXL_20230125_201147132.dng	1302	PXL_20230125_201147132	dng	6	6	1
FieldData\Smithsonian Pictures\NOVA-DC-MD\Juvenile\54751	7	PXL_20230125_201147899.dng	1303	PXL_20230125_201147899	dng	7	7	1
FieldData\Smithsonian Pictures\NOVA-DC-MD\Juvenile\54751	8	PXL_20230125_201201188.dng	1304	PXL_20230125_201201188	dng	8	8	1
FieldData\Smithsonian Pictures\NOVA-DC-MD\Juvenile\54751	9	PXL_20230125_201201989.dng	1305	PXL_20230125_201201989	dng	9	9	1
FieldData\Smithsonian Pictures\NOVA-DC-MD\Juvenile\54751	10	PXL_20230125_201210990.dng	1306	PXL_20230125_201210990	dng	10	10	1
FieldData\Smithsonian Pictures\NOVA-DC-MD\Juvenile\54751	11	PXL_20230125_201211873.dng	1307	PXL_20230125_201211873	dng	11	11	1
FieldData\Smithsonian Pictures\NOVA-DC-MD\Juvenile\588439	1	PXL_20230210_184104970.dng	1308	PXL_20230210_184104970	dng	1	1	1
FieldData\Smithsonian Pictures\NOVA-DC-MD\Juvenile\588439	2	PXL_20230210_184106598.dng	1309	PXL_20230210_184106598	dng	2	2	1
FieldData\Smithsonian Pictures\NOVA-DC-MD\Juvenile\588439	3	PXL_20230210_184108589.dng	1310	PXL_20230210_184108589	dng	3	3	1
FieldData\Smithsonian Pictures\NOVA-DC-MD\Juvenile\588439	4	PXL_20230210_184124146.dng	1311	PXL_20230210_184124146	dng	4	4	1
FieldData\Smithsonian Pictures\NOVA-DC-MD\Juvenile\588439	5	PXL_20230210_184124800.dng	1312	PXL_20230210_184124800	dng	5	5	1
FieldData\Smithsonian Pictures\NOVA-DC-MD\Juvenile\588439	6	PXL_20230210_184131906.dng	1313	PXL_20230210_184131906	dng	6	6	1
FieldData\Smithsonian Pictures\NOVA-DC-MD\Juvenile\588439	7	PXL_20230210_184132723.dng	1314	PXL_20230210_184132723	dng	7	7	1
FieldData\Smithsonian Pictures\NOVA-DC-MD\Juvenile\588439	8	PXL_20230210_184146941.dng	1315	PXL_20230210_184146941	dng	8	8	1
FieldData\Smithsonian Pictures\NOVA-DC-MD\Juvenile\588439	9	PXL_20230210_184147624.dng	1316	PXL_20230210_184147624	dng	9	9	1
FieldData\Smithsonian Pictures\NOVA-DC-MD\Juvenile\588439	10	PXL_20230210_184158444.dng	1317	PXL_20230210_184158444	dng	10	10	1
FieldData\Smithsonian Pictures\NOVA-DC-MD\Juvenile\588439	11	PXL_20230210_184159441.dng	1318	PXL_20230210_184159441	dng	11	11	1
FieldData\Smithsonian Pictures\NOVA-DC-MD\Juvenile\62012	1	PXL_20230125_201653868.dng	1319	PXL_20230125_201653868	dng	4	1	0
FieldData\Smithsonian Pictures\NOVA-DC-MD\Juvenile\62012	2	PXL_20230125_201655583.dng	1320	PXL_20230125_201655583	dng	5	2	0
FieldData\Smithsonian Pictures\NOVA-DC-MD\Juvenile\62012	3	PXL_20230125_201704757.dng	1321	PXL_20230125_201704757	dng	6	3	0
FieldData\Smithsonian Pictures\NOVA-DC-MD\Juvenile\62012	4	PXL_20230125_201705416.dng	1322	PXL_20230125_201705416	dng	7	4	0
FieldData\Smithsonian Pictures\NOVA-DC-MD\Juvenile\62012	5	PXL_20230125_201719065.dng	1323	PXL_20230125_201719065	dng	8	5	0
FieldData\Smithsonian Pictures\NOVA-DC-MD\Juvenile\62012	6	PXL_20230125_201719930.dng	1324	PXL_20230125_201719930	dng	9	6	0
FieldData\Smithsonian Pictures\NOVA-DC-MD\Juvenile\62012	7	PXL_20230125_201729717.dng	1325	PXL_20230125_201729717	dng	10	7	0
FieldData\Smithsonian Pictures\NOVA-DC-MD\Juvenile\62012	8	PXL_20230125_201730597.dng	1326	PXL_20230125_201730597	dng	11	8	0
FieldData\Smithsonian Pictures\NOVA-DC-MD\Juvenile\62012	9	aPXL_20230214_200602005.dng	1327	aPXL_20230214_200602005	dng	1	9	0
FieldData\Smithsonian Pictures\NOVA-DC-MD\Juvenile\62012	10	aPXL_20230214_200603374.dng	1328	aPXL_20230214_200603374	dng	2	10	0
FieldData\Smithsonian Pictures\NOVA-DC-MD\Juvenile\62012	11	aPXL_20230214_200605505.dng	1329	aPXL_20230214_200605505	dng	3	11	0
FieldData\Smithsonian Pictures\NOVA-DC-MD\Juvenile\67771	1	PXL_20230131_164120152.dng	1330	PXL_20230131_164120152	dng	1	1	1
FieldData\Smithsonian Pictures\NOVA-DC-MD\Juvenile\67771	2	PXL_20230131_164123076.dng	1331	PXL_20230131_164123076	dng	2	2	1
FieldData\Smithsonian Pictures\NOVA-DC-MD\Juvenile\67771	3	PXL_20230131_184559142.dng	1332	PXL_20230131_184559142	dng	3	3	1
FieldData\Smithsonian Pictures\NOVA-DC-MD\Juvenile\67771	4	PXL_20230131_184618963.dng	1333	PXL_20230131_184618963	dng	4	4	1
FieldData\Smithsonian Pictures\NOVA-DC-MD\Juvenile\67771	5	PXL_20230131_184620116.dng	1334	PXL_20230131_184620116	dng	5	5	1
FieldData\Smithsonian Pictures\NOVA-DC-MD\Juvenile\67771	6	PXL_20230131_184626171.dng	1335	PXL_20230131_184626171	dng	6	6	1
FieldData\Smithsonian Pictures\NOVA-DC-MD\Juvenile\67771	7	PXL_20230131_184627058.dng	1336	PXL_20230131_184627058	dng	7	7	1
FieldData\Smithsonian Pictures\NOVA-DC-MD\Juvenile\67771	8	PXL_20230131_184632216.dng	1337	PXL_20230131_184632216	dng	8	8	1
FieldData\Smithsonian Pictures\NOVA-DC-MD\Juvenile\67771	9	PXL_20230131_184633303.dng	1338	PXL_20230131_184633303	dng	9	9	1
FieldData\Smithsonian Pictures\NOVA-DC-MD\Juvenile\67771	10	PXL_20230131_184638971.dng	1339	PXL_20230131_184638971	dng	10	10	1
FieldData\Smithsonian Pictures\NOVA-DC-MD\Juvenile\67771	11	PXL_20230131_184639916.dng	1340	PXL_20230131_184639916	dng	11	11	1
FieldData\Smithsonian Pictures\NOVA-DC-MD\Juvenile\67772	1	PXL_20230131_191236058.dng	1341	PXL_20230131_191236058	dng	1	1	1
FieldData\Smithsonian Pictures\NOVA-DC-MD\Juvenile\67772	2	PXL_20230131_191238130.dng	1342	PXL_20230131_191238130	dng	2	2	1
FieldData\Smithsonian Pictures\NOVA-DC-MD\Juvenile\67772	3	PXL_20230131_191242804.dng	1343	PXL_20230131_191242804	dng	3	3	1
FieldData\Smithsonian Pictures\NOVA-DC-MD\Juvenile\67772	4	PXL_20230131_191255669.dng	1344	PXL_20230131_191255669	dng	4	4	1
FieldData\Smithsonian Pictures\NOVA-DC-MD\Juvenile\67772	5	PXL_20230131_191256998.dng	1345	PXL_20230131_191256998	dng	5	5	1
FieldData\Smithsonian Pictures\NOVA-DC-MD\Juvenile\67772	6	PXL_20230131_191308430.dng	1346	PXL_20230131_191308430	dng	6	6	1
FieldData\Smithsonian Pictures\NOVA-DC-MD\Juvenile\67772	7	PXL_20230131_191309250.dng	1347	PXL_20230131_191309250	dng	7	7	1
FieldData\Smithsonian Pictures\NOVA-DC-MD\Juvenile\67772	8	PXL_20230131_191318660.dng	1348	PXL_20230131_191318660	dng	8	8	1
FieldData\Smithsonian Pictures\NOVA-DC-MD\Juvenile\67772	9	PXL_20230131_191320130.dng	1349	PXL_20230131_191320130	dng	9	9	1
FieldData\Smithsonian Pictures\NOVA-DC-MD\Juvenile\67772	10	PXL_20230131_191332687.dng	1350	PXL_20230131_191332687	dng	10	10	1
FieldData\Smithsonian Pictures\NOVA-DC-MD\Juvenile\67772	11	PXL_20230131_191333460.dng	1351	PXL_20230131_191333460	dng	11	11	1
FieldData\Smithsonian Pictures\NOVA-DC-MD\Juvenile\67773	1	PXL_20230131_190141629.dng	1352	PXL_20230131_190141629	dng	1	1	1
FieldData\Smithsonian Pictures\NOVA-DC-MD\Juvenile\67773	2	PXL_20230131_190150163.dng	1353	PXL_20230131_190150163	dng	2	2	1
FieldData\Smithsonian Pictures\NOVA-DC-MD\Juvenile\67773	3	PXL_20230131_190152779.dng	1354	PXL_20230131_190152779	dng	3	3	1
FieldData\Smithsonian Pictures\NOVA-DC-MD\Juvenile\67773	4	PXL_20230131_190204754.dng	1355	PXL_20230131_190204754	dng	4	4	1
FieldData\Smithsonian Pictures\NOVA-DC-MD\Juvenile\67773	5	PXL_20230131_190205866.dng	1356	PXL_20230131_190205866	dng	5	5	1
FieldData\Smithsonian Pictures\NOVA-DC-MD\Juvenile\67773	6	PXL_20230131_190213844.dng	1357	PXL_20230131_190213844	dng	6	6	1
FieldData\Smithsonian Pictures\NOVA-DC-MD\Juvenile\67773	7	PXL_20230131_190214647.dng	1358	PXL_20230131_190214647	dng	7	7	1
FieldData\Smithsonian Pictures\NOVA-DC-MD\Juvenile\67773	8	PXL_20230131_190224593.dng	1359	PXL_20230131_190224593	dng	8	8	1
FieldData\Smithsonian Pictures\NOVA-DC-MD\Juvenile\67773	9	PXL_20230131_190225971.dng	1360	PXL_20230131_190225971	dng	9	9	1
FieldData\Smithsonian Pictures\NOVA-DC-MD\Juvenile\67773	10	PXL_20230131_190234745.dng	1361	PXL_20230131_190234745	dng	10	10	1
FieldData\Smithsonian Pictures\NOVA-DC-MD\Juvenile\67773	11	PXL_20230131_190235497.dng	1362	PXL_20230131_190235497	dng	11	11	1
FieldData\Smithsonian Pictures\NOVA-DC-MD\Juvenile\80304	1	PXL_20230131_191911274.dng	1363	PXL_20230131_191911274	dng	1	1	1
FieldData\Smithsonian Pictures\NOVA-DC-MD\Juvenile\80304	2	PXL_20230131_191914601.dng	1364	PXL_20230131_191914601	dng	2	2	1
FieldData\Smithsonian Pictures\NOVA-DC-MD\Juvenile\80304	3	PXL_20230131_191939870.dng	1365	PXL_20230131_191939870	dng	3	3	1
FieldData\Smithsonian Pictures\NOVA-DC-MD\Juvenile\80304	4	PXL_20230131_191943543.dng	1366	PXL_20230131_191943543	dng	4	4	1
FieldData\Smithsonian Pictures\NOVA-DC-MD\Juvenile\80304	5	PXL_20230131_191956693.dng	1367	PXL_20230131_191956693	dng	5	5	1
FieldData\Smithsonian Pictures\NOVA-DC-MD\Juvenile\80304	6	PXL_20230131_191957502.dng	1368	PXL_20230131_191957502	dng	6	6	1
FieldData\Smithsonian Pictures\NOVA-DC-MD\Juvenile\80304	7	PXL_20230131_192006054.dng	1369	PXL_20230131_192006054	dng	7	7	1
FieldData\Smithsonian Pictures\NOVA-DC-MD\Juvenile\80304	8	PXL_20230131_192006900.dng	1370	PXL_20230131_192006900	dng	8	8	1
FieldData\Smithsonian Pictures\NOVA-DC-MD\Juvenile\80304	9	PXL_20230131_192020373.dng	1371	PXL_20230131_192020373	dng	9	9	1
FieldData\Smithsonian Pictures\NOVA-DC-MD\Juvenile\80304	10	PXL_20230131_192021188.dng	1372	PXL_20230131_192021188	dng	10	10	1
FieldData\Smithsonian Pictures\Southern VA\Adult\497232	1	PXL_20230208_194219613.dng	1373	PXL_20230208_194219613	dng	1	1	1
FieldData\Smithsonian Pictures\Southern VA\Adult\497232	2	PXL_20230208_194222987.dng	1374	PXL_20230208_194222987	dng	2	2	1
FieldData\Smithsonian Pictures\Southern VA\Adult\497232	3	PXL_20230208_194226015.dng	1375	PXL_20230208_194226015	dng	3	3	1
FieldData\Smithsonian Pictures\Southern VA\Adult\497232	4	PXL_20230208_194243767.dng	1376	PXL_20230208_194243767	dng	4	4	1
FieldData\Smithsonian Pictures\Southern VA\Adult\497232	5	PXL_20230208_194245538.dng	1377	PXL_20230208_194245538	dng	5	5	1
FieldData\Smithsonian Pictures\Southern VA\Adult\497232	6	PXL_20230208_194256341.dng	1378	PXL_20230208_194256341	dng	6	6	1
FieldData\Smithsonian Pictures\Southern VA\Adult\497232	7	PXL_20230208_194256935.dng	1379	PXL_20230208_194256935	dng	7	7	1
FieldData\Smithsonian Pictures\Southern VA\Adult\497232	8	PXL_20230208_194305393.dng	1380	PXL_20230208_194305393	dng	8	8	1
FieldData\Smithsonian Pictures\Southern VA\Adult\497232	9	PXL_20230208_194306574.dng	1381	PXL_20230208_194306574	dng	9	9	1
FieldData\Smithsonian Pictures\Southern VA\Adult\497232	10	PXL_20230208_194311979.dng	1382	PXL_20230208_194311979	dng	10	10	1
FieldData\Smithsonian Pictures\Southern VA\Adult\497232	11	PXL_20230208_194313877.dng	1383	PXL_20230208_194313877	dng	11	11	1
FieldData\Smithsonian Pictures\Southern VA\Adult\497235	1	PXL_20230208_191741972.dng	1384	PXL_20230208_191741972	dng	1	1	1
FieldData\Smithsonian Pictures\Southern VA\Adult\497235	2	PXL_20230208_191744520.dng	1385	PXL_20230208_191744520	dng	2	2	1
FieldData\Smithsonian Pictures\Southern VA\Adult\497235	3	PXL_20230208_191746713.dng	1386	PXL_20230208_191746713	dng	3	3	1
FieldData\Smithsonian Pictures\Southern VA\Adult\497235	4	PXL_20230208_191755290.dng	1387	PXL_20230208_191755290	dng	4	4	1
FieldData\Smithsonian Pictures\Southern VA\Adult\497235	5	PXL_20230208_191756457.dng	1388	PXL_20230208_191756457	dng	5	5	1
FieldData\Smithsonian Pictures\Southern VA\Adult\497235	6	PXL_20230208_191804649.dng	1389	PXL_20230208_191804649	dng	6	6	1
FieldData\Smithsonian Pictures\Southern VA\Adult\497235	7	PXL_20230208_191805826.dng	1390	PXL_20230208_191805826	dng	7	7	1
FieldData\Smithsonian Pictures\Southern VA\Adult\497235	8	PXL_20230208_191814169.dng	1391	PXL_20230208_191814169	dng	8	8	1
FieldData\Smithsonian Pictures\Southern VA\Adult\497235	9	PXL_20230208_191814849.dng	1392	PXL_20230208_191814849	dng	9	9	1
FieldData\Smithsonian Pictures\Southern VA\Adult\497235	10	PXL_20230208_191822873.dng	1393	PXL_20230208_191822873	dng	10	10	1
FieldData\Smithsonian Pictures\Southern VA\Adult\497235	11	PXL_20230208_191823927.dng	1394	PXL_20230208_191823927	dng	11	11	1
FieldData\Smithsonian Pictures\Southern VA\Adult\497236	1	PXL_20230208_191515510.dng	1395	PXL_20230208_191515510	dng	1	1	1
FieldData\Smithsonian Pictures\Southern VA\Adult\497236	2	PXL_20230208_191520966.dng	1396	PXL_20230208_191520966	dng	2	2	1
FieldData\Smithsonian Pictures\Southern VA\Adult\497236	3	PXL_20230208_191522815.dng	1397	PXL_20230208_191522815	dng	3	3	1
FieldData\Smithsonian Pictures\Southern VA\Adult\497236	4	PXL_20230208_191537248.dng	1398	PXL_20230208_191537248	dng	4	4	1
FieldData\Smithsonian Pictures\Southern VA\Adult\497236	5	PXL_20230208_191538500.dng	1399	PXL_20230208_191538500	dng	5	5	1
FieldData\Smithsonian Pictures\Southern VA\Adult\497236	6	PXL_20230208_191546060.dng	1400	PXL_20230208_191546060	dng	6	6	1
FieldData\Smithsonian Pictures\Southern VA\Adult\497236	7	PXL_20230208_191546854.dng	1401	PXL_20230208_191546854	dng	7	7	1
FieldData\Smithsonian Pictures\Southern VA\Adult\497236	8	PXL_20230208_191554813.dng	1402	PXL_20230208_191554813	dng	8	8	1
FieldData\Smithsonian Pictures\Southern VA\Adult\497236	9	PXL_20230208_191555884.dng	1403	PXL_20230208_191555884	dng	9	9	1
FieldData\Smithsonian Pictures\Southern VA\Adult\497236	10	PXL_20230208_191604392.dng	1404	PXL_20230208_191604392	dng	10	10	1
FieldData\Smithsonian Pictures\Southern VA\Adult\497236	11	PXL_20230208_191606850.dng	1405	PXL_20230208_191606850	dng	11	11	1
FieldData\Smithsonian Pictures\Southern VA\Adult\497237	1	PXL_20230208_191248707.dng	1406	PXL_20230208_191248707	dng	1	1	1
FieldData\Smithsonian Pictures\Southern VA\Adult\497237	2	PXL_20230208_191251934.dng	1407	PXL_20230208_191251934	dng	2	2	1
FieldData\Smithsonian Pictures\Southern VA\Adult\497237	3	PXL_20230208_191253758.dng	1408	PXL_20230208_191253758	dng	3	3	1
FieldData\Smithsonian Pictures\Southern VA\Adult\497237	4	PXL_20230208_191308131.dng	1409	PXL_20230208_191308131	dng	4	4	1
FieldData\Smithsonian Pictures\Southern VA\Adult\497237	5	PXL_20230208_191309250.dng	1410	PXL_20230208_191309250	dng	5	5	1
FieldData\Smithsonian Pictures\Southern VA\Adult\497237	6	PXL_20230208_191320472.dng	1411	PXL_20230208_191320472	dng	6	6	1
FieldData\Smithsonian Pictures\Southern VA\Adult\497237	7	PXL_20230208_191322231.dng	1412	PXL_20230208_191322231	dng	7	7	1
FieldData\Smithsonian Pictures\Southern VA\Adult\497237	8	PXL_20230208_191334978.dng	1413	PXL_20230208_191334978	dng	8	8	1
FieldData\Smithsonian Pictures\Southern VA\Adult\497237	9	PXL_20230208_191335667.dng	1414	PXL_20230208_191335667	dng	9	9	1
FieldData\Smithsonian Pictures\Southern VA\Adult\497237	10	PXL_20230208_191342624.dng	1415	PXL_20230208_191342624	dng	10	10	1
FieldData\Smithsonian Pictures\Southern VA\Adult\497237	11	PXL_20230208_191344732.dng	1416	PXL_20230208_191344732	dng	11	11	1
FieldData\Smithsonian Pictures\Southern VA\Adult\497246	1	PXL_20230208_190635763.dng	1417	PXL_20230208_190635763	dng	1	1	1
FieldData\Smithsonian Pictures\Southern VA\Adult\497246	2	PXL_20230208_190638105.dng	1418	PXL_20230208_190638105	dng	2	2	1
FieldData\Smithsonian Pictures\Southern VA\Adult\497246	3	PXL_20230208_190640600.dng	1419	PXL_20230208_190640600	dng	3	3	1
FieldData\Smithsonian Pictures\Southern VA\Adult\497246	4	PXL_20230208_190701229.dng	1420	PXL_20230208_190701229	dng	4	4	1
FieldData\Smithsonian Pictures\Southern VA\Adult\497246	5	PXL_20230208_190701865.dng	1421	PXL_20230208_190701865	dng	5	5	1
FieldData\Smithsonian Pictures\Southern VA\Adult\497246	6	PXL_20230208_190714578.dng	1422	PXL_20230208_190714578	dng	6	6	1
FieldData\Smithsonian Pictures\Southern VA\Adult\497246	7	PXL_20230208_190715395.dng	1423	PXL_20230208_190715395	dng	7	7	1
FieldData\Smithsonian Pictures\Southern VA\Adult\497246	8	PXL_20230208_190723913.dng	1424	PXL_20230208_190723913	dng	8	8	1
FieldData\Smithsonian Pictures\Southern VA\Adult\497246	9	PXL_20230208_190724655.dng	1425	PXL_20230208_190724655	dng	9	9	1
FieldData\Smithsonian Pictures\Southern VA\Adult\497246	10	PXL_20230208_190731510.dng	1426	PXL_20230208_190731510	dng	10	10	1
FieldData\Smithsonian Pictures\Southern VA\Adult\497246	11	PXL_20230208_190732281.dng	1427	PXL_20230208_190732281	dng	11	11	1
FieldData\Smithsonian Pictures\Southern VA\Adult\497250	1	PXL_20230208_211848683.dng	1428	PXL_20230208_211848683	dng	1	1	1
FieldData\Smithsonian Pictures\Southern VA\Adult\497250	2	PXL_20230208_211853932.dng	1429	PXL_20230208_211853932	dng	2	2	1
FieldData\Smithsonian Pictures\Southern VA\Adult\497250	3	PXL_20230208_211855234.dng	1430	PXL_20230208_211855234	dng	3	3	1
FieldData\Smithsonian Pictures\Southern VA\Adult\497250	4	PXL_20230208_211907244.dng	1431	PXL_20230208_211907244	dng	4	4	1
FieldData\Smithsonian Pictures\Southern VA\Adult\497250	5	PXL_20230208_211908159.dng	1432	PXL_20230208_211908159	dng	5	5	1
FieldData\Smithsonian Pictures\Southern VA\Adult\497250	6	PXL_20230208_211917541.dng	1433	PXL_20230208_211917541	dng	6	6	1
FieldData\Smithsonian Pictures\Southern VA\Adult\497250	7	PXL_20230208_211918727.dng	1434	PXL_20230208_211918727	dng	7	7	1
FieldData\Smithsonian Pictures\Southern VA\Adult\497250	8	PXL_20230208_211932147.dng	1435	PXL_20230208_211932147	dng	8	8	1
FieldData\Smithsonian Pictures\Southern VA\Adult\497250	9	PXL_20230208_211934894.dng	1436	PXL_20230208_211934894	dng	9	9	1
FieldData\Smithsonian Pictures\Southern VA\Adult\497250	10	PXL_20230208_211945732.dng	1437	PXL_20230208_211945732	dng	10	10	1
FieldData\Smithsonian Pictures\Southern VA\Adult\497250	11	PXL_20230208_211946762.dng	1438	PXL_20230208_211946762	dng	11	11	1
FieldData\Smithsonian Pictures\Southern VA\Adult\497251	1	PXL_20230208_212753933.dng	1439	PXL_20230208_212753933	dng	1	1	1
FieldData\Smithsonian Pictures\Southern VA\Adult\497251	2	PXL_20230208_212756144.dng	1440	PXL_20230208_212756144	dng	2	2	1
FieldData\Smithsonian Pictures\Southern VA\Adult\497251	3	PXL_20230208_212757283.dng	1441	PXL_20230208_212757283	dng	3	3	1
FieldData\Smithsonian Pictures\Southern VA\Adult\497251	4	PXL_20230208_212808320.dng	1442	PXL_20230208_212808320	dng	4	4	1
FieldData\Smithsonian Pictures\Southern VA\Adult\497251	5	PXL_20230208_212809073.dng	1443	PXL_20230208_212809073	dng	5	5	1
FieldData\Smithsonian Pictures\Southern VA\Adult\497251	6	PXL_20230208_212815392.dng	1444	PXL_20230208_212815392	dng	6	6	1
FieldData\Smithsonian Pictures\Southern VA\Adult\497251	7	PXL_20230208_212816164.dng	1445	PXL_20230208_212816164	dng	7	7	1
FieldData\Smithsonian Pictures\Southern VA\Adult\497251	8	PXL_20230208_212825884.dng	1446	PXL_20230208_212825884	dng	8	8	1
FieldData\Smithsonian Pictures\Southern VA\Adult\497251	9	PXL_20230208_212827700.dng	1447	PXL_20230208_212827700	dng	9	9	1
FieldData\Smithsonian Pictures\Southern VA\Adult\497251	10	PXL_20230208_212834777.dng	1448	PXL_20230208_212834777	dng	10	10	1
FieldData\Smithsonian Pictures\Southern VA\Adult\497251	11	PXL_20230208_212835520.dng	1449	PXL_20230208_212835520	dng	11	11	1
FieldData\Smithsonian Pictures\Southern VA\Adult\497252	1	PXL_20230208_210721336.dng	1450	PXL_20230208_210721336	dng	1	1	1
FieldData\Smithsonian Pictures\Southern VA\Adult\497252	2	PXL_20230208_210723180.dng	1451	PXL_20230208_210723180	dng	2	2	1
FieldData\Smithsonian Pictures\Southern VA\Adult\497252	3	PXL_20230208_210724244.dng	1452	PXL_20230208_210724244	dng	3	3	1
FieldData\Smithsonian Pictures\Southern VA\Adult\497252	4	PXL_20230208_210742258.dng	1453	PXL_20230208_210742258	dng	4	4	1
FieldData\Smithsonian Pictures\Southern VA\Adult\497252	5	PXL_20230208_210742894.dng	1454	PXL_20230208_210742894	dng	5	5	1
FieldData\Smithsonian Pictures\Southern VA\Adult\497252	6	PXL_20230208_210800447.dng	1455	PXL_20230208_210800447	dng	6	6	1
FieldData\Smithsonian Pictures\Southern VA\Adult\497252	7	PXL_20230208_210801111.dng	1456	PXL_20230208_210801111	dng	7	7	1
FieldData\Smithsonian Pictures\Southern VA\Adult\497252	8	PXL_20230208_210818949.dng	1457	PXL_20230208_210818949	dng	8	8	1
FieldData\Smithsonian Pictures\Southern VA\Adult\497252	9	PXL_20230208_210819761.dng	1458	PXL_20230208_210819761	dng	9	9	1
FieldData\Smithsonian Pictures\Southern VA\Adult\497252	10	PXL_20230208_210831253.dng	1459	PXL_20230208_210831253	dng	10	10	1
FieldData\Smithsonian Pictures\Southern VA\Adult\497252	11	PXL_20230208_210837833.dng	1460	PXL_20230208_210837833	dng	11	11	1
FieldData\Smithsonian Pictures\Southern VA\Adult\497254	1	PXL_20230208_210448671.dng	1461	PXL_20230208_210448671	dng	1	1	1
FieldData\Smithsonian Pictures\Southern VA\Adult\497254	2	PXL_20230208_210450791.dng	1462	PXL_20230208_210450791	dng	2	2	1
FieldData\Smithsonian Pictures\Southern VA\Adult\497254	3	PXL_20230208_210453350.dng	1463	PXL_20230208_210453350	dng	3	3	1
FieldData\Smithsonian Pictures\Southern VA\Adult\497254	4	PXL_20230208_210508890.dng	1464	PXL_20230208_210508890	dng	4	4	1
FieldData\Smithsonian Pictures\Southern VA\Adult\497254	5	PXL_20230208_210509591.dng	1465	PXL_20230208_210509591	dng	5	5	1
FieldData\Smithsonian Pictures\Southern VA\Adult\497254	6	PXL_20230208_210517593.dng	1466	PXL_20230208_210517593	dng	6	6	1
FieldData\Smithsonian Pictures\Southern VA\Adult\497254	7	PXL_20230208_210518433.dng	1467	PXL_20230208_210518433	dng	7	7	1
FieldData\Smithsonian Pictures\Southern VA\Adult\497254	8	PXL_20230208_210525604.dng	1468	PXL_20230208_210525604	dng	8	8	1
FieldData\Smithsonian Pictures\Southern VA\Adult\497254	9	PXL_20230208_210526380.dng	1469	PXL_20230208_210526380	dng	9	9	1
FieldData\Smithsonian Pictures\Southern VA\Adult\497254	10	PXL_20230208_210538741.dng	1470	PXL_20230208_210538741	dng	10	10	1
FieldData\Smithsonian Pictures\Southern VA\Adult\497254	11	PXL_20230208_210540282.dng	1471	PXL_20230208_210540282	dng	11	11	1
FieldData\Smithsonian Pictures\Southern VA\Adult\497261	1	PXL_20230208_205629687.dng	1472	PXL_20230208_205629687	dng	1	1	1
FieldData\Smithsonian Pictures\Southern VA\Adult\497261	2	PXL_20230208_205633990.dng	1473	PXL_20230208_205633990	dng	2	2	1
FieldData\Smithsonian Pictures\Southern VA\Adult\497261	3	PXL_20230208_205636026.dng	1474	PXL_20230208_205636026	dng	3	3	1
FieldData\Smithsonian Pictures\Southern VA\Adult\497261	4	PXL_20230208_205650118.dng	1475	PXL_20230208_205650118	dng	4	4	1
FieldData\Smithsonian Pictures\Southern VA\Adult\497261	5	PXL_20230208_205650871.dng	1476	PXL_20230208_205650871	dng	5	5	1
FieldData\Smithsonian Pictures\Southern VA\Adult\497261	6	PXL_20230208_205700026.dng	1477	PXL_20230208_205700026	dng	6	6	1
FieldData\Smithsonian Pictures\Southern VA\Adult\497261	7	PXL_20230208_205700788.dng	1478	PXL_20230208_205700788	dng	7	7	1
FieldData\Smithsonian Pictures\Southern VA\Adult\497261	8	PXL_20230208_205708408.dng	1479	PXL_20230208_205708408	dng	8	8	1
FieldData\Smithsonian Pictures\Southern VA\Adult\497261	9	PXL_20230208_205709644.dng	1480	PXL_20230208_205709644	dng	9	9	1
FieldData\Smithsonian Pictures\Southern VA\Adult\497261	10	PXL_20230208_205717296.dng	1481	PXL_20230208_205717296	dng	10	10	1
FieldData\Smithsonian Pictures\Southern VA\Adult\497261	11	PXL_20230208_205720485.dng	1482	PXL_20230208_205720485	dng	11	11	1
FieldData\Smithsonian Pictures\Southern VA\Adult\497268	1	PXL_20230208_205038081.dng	1483	PXL_20230208_205038081	dng	1	1	1
FieldData\Smithsonian Pictures\Southern VA\Adult\497268	2	PXL_20230208_205040579.dng	1484	PXL_20230208_205040579	dng	2	2	1
FieldData\Smithsonian Pictures\Southern VA\Adult\497268	3	PXL_20230208_205042451.dng	1485	PXL_20230208_205042451	dng	3	3	1
FieldData\Smithsonian Pictures\Southern VA\Adult\497268	4	PXL_20230208_205053360.dng	1486	PXL_20230208_205053360	dng	4	4	1
FieldData\Smithsonian Pictures\Southern VA\Adult\497268	5	PXL_20230208_205059504.dng	1487	PXL_20230208_205059504	dng	5	5	1
FieldData\Smithsonian Pictures\Southern VA\Adult\497268	6	PXL_20230208_205100157.dng	1488	PXL_20230208_205100157	dng	6	6	1
FieldData\Smithsonian Pictures\Southern VA\Adult\497268	7	PXL_20230208_205114753.dng	1489	PXL_20230208_205114753	dng	7	7	1
FieldData\Smithsonian Pictures\Southern VA\Adult\497268	8	PXL_20230208_205115787.dng	1490	PXL_20230208_205115787	dng	8	8	1
FieldData\Smithsonian Pictures\Southern VA\Adult\497268	9	PXL_20230208_205128010.dng	1491	PXL_20230208_205128010	dng	9	9	1
FieldData\Smithsonian Pictures\Southern VA\Adult\497268	10	PXL_20230208_205128692.dng	1492	PXL_20230208_205128692	dng	10	10	1
FieldData\Smithsonian Pictures\Southern VA\Adult\497268	11	PXL_20230208_205137725.dng	1493	PXL_20230208_205137725	dng	11	11	1
FieldData\Smithsonian Pictures\Southern VA\Adult\497268	12	PXL_20230208_205138473.dng	1494	PXL_20230208_205138473	dng	12	12	1
FieldData\Smithsonian Pictures\Southern VA\Adult\497301	1	PXL_20230208_201554809.dng	1495	PXL_20230208_201554809	dng	1	1	1
FieldData\Smithsonian Pictures\Southern VA\Adult\497301	2	PXL_20230208_201559697.dng	1496	PXL_20230208_201559697	dng	2	2	1
FieldData\Smithsonian Pictures\Southern VA\Adult\497301	3	PXL_20230208_201601844.dng	1497	PXL_20230208_201601844	dng	3	3	1
FieldData\Smithsonian Pictures\Southern VA\Adult\497301	4	PXL_20230208_201622820.dng	1498	PXL_20230208_201622820	dng	4	4	1
FieldData\Smithsonian Pictures\Southern VA\Adult\497301	5	PXL_20230208_201623634.dng	1499	PXL_20230208_201623634	dng	5	5	1
FieldData\Smithsonian Pictures\Southern VA\Adult\497301	6	PXL_20230208_201635626.dng	1500	PXL_20230208_201635626	dng	6	6	1
FieldData\Smithsonian Pictures\Southern VA\Adult\497301	7	PXL_20230208_201636552.dng	1501	PXL_20230208_201636552	dng	7	7	1
FieldData\Smithsonian Pictures\Southern VA\Adult\497301	8	PXL_20230208_201644612.dng	1502	PXL_20230208_201644612	dng	8	8	1
FieldData\Smithsonian Pictures\Southern VA\Adult\497301	9	PXL_20230208_201645395.dng	1503	PXL_20230208_201645395	dng	9	9	1
FieldData\Smithsonian Pictures\Southern VA\Adult\497301	10	PXL_20230208_201652258.dng	1504	PXL_20230208_201652258	dng	10	10	1
FieldData\Smithsonian Pictures\Southern VA\Adult\497301	11	PXL_20230208_201654708.dng	1505	PXL_20230208_201654708	dng	11	11	1
FieldData\Smithsonian Pictures\Southern VA\Adult\519624	1	PXL_20230210_192058805.dng	1506	PXL_20230210_192058805	dng	1	1	1
FieldData\Smithsonian Pictures\Southern VA\Adult\519624	2	PXL_20230210_192102393.dng	1507	PXL_20230210_192102393	dng	2	2	1
FieldData\Smithsonian Pictures\Southern VA\Adult\519624	3	PXL_20230210_192105121.dng	1508	PXL_20230210_192105121	dng	3	3	1
FieldData\Smithsonian Pictures\Southern VA\Adult\519624	4	PXL_20230210_192119527.dng	1509	PXL_20230210_192119527	dng	4	4	1
FieldData\Smithsonian Pictures\Southern VA\Adult\519624	5	PXL_20230210_192120435.dng	1510	PXL_20230210_192120435	dng	5	5	1
FieldData\Smithsonian Pictures\Southern VA\Adult\519624	6	PXL_20230210_192131612.dng	1511	PXL_20230210_192131612	dng	6	6	1
FieldData\Smithsonian Pictures\Southern VA\Adult\519624	7	PXL_20230210_192132330.dng	1512	PXL_20230210_192132330	dng	7	7	1
FieldData\Smithsonian Pictures\Southern VA\Adult\519624	8	PXL_20230210_192139248.dng	1513	PXL_20230210_192139248	dng	8	8	1
FieldData\Smithsonian Pictures\Southern VA\Adult\519624	9	PXL_20230210_192139926.dng	1514	PXL_20230210_192139926	dng	9	9	1
FieldData\Smithsonian Pictures\Southern VA\Adult\519624	10	PXL_20230210_192151010.dng	1515	PXL_20230210_192151010	dng	10	10	1
FieldData\Smithsonian Pictures\Southern VA\Adult\519624	11	PXL_20230210_192151779.dng	1516	PXL_20230210_192151779	dng	11	11	1
FieldData\Smithsonian Pictures\Southern VA\Hatchlings\519625	1	PXL_20230210_205254752.dng	1517	PXL_20230210_205254752	dng	1	1	1
FieldData\Smithsonian Pictures\Southern VA\Hatchlings\519625	2	PXL_20230210_205257885.dng	1518	PXL_20230210_205257885	dng	2	2	1
FieldData\Smithsonian Pictures\Southern VA\Hatchlings\519625	3	PXL_20230210_205259557.dng	1519	PXL_20230210_205259557	dng	3	3	1
FieldData\Smithsonian Pictures\Southern VA\Hatchlings\519625	4	PXL_20230210_205321702.dng	1520	PXL_20230210_205321702	dng	4	4	1
FieldData\Smithsonian Pictures\Southern VA\Hatchlings\519625	5	PXL_20230210_205322292.dng	1521	PXL_20230210_205322292	dng	5	5	1
FieldData\Smithsonian Pictures\Southern VA\Hatchlings\519625	6	PXL_20230210_205333123.dng	1522	PXL_20230210_205333123	dng	6	6	1
FieldData\Smithsonian Pictures\Southern VA\Hatchlings\519625	7	PXL_20230210_205334005.dng	1523	PXL_20230210_205334005	dng	7	7	1
FieldData\Smithsonian Pictures\Southern VA\Hatchlings\519625	8	PXL_20230210_205345087.dng	1524	PXL_20230210_205345087	dng	8	8	1
FieldData\Smithsonian Pictures\Southern VA\Hatchlings\519625	9	PXL_20230210_205345794.dng	1525	PXL_20230210_205345794	dng	9	9	1
FieldData\Smithsonian Pictures\Southern VA\Hatchlings\519625	10	PXL_20230210_205359306.dng	1526	PXL_20230210_205359306	dng	10	10	1
FieldData\Smithsonian Pictures\Southern VA\Hatchlings\519625	11	PXL_20230210_205400615.dng	1527	PXL_20230210_205400615	dng	11	11	1
FieldData\Smithsonian Pictures\Southern VA\Hatchlings\519626	1	PXL_20230210_191726947.dng	1528	PXL_20230210_191726947	dng	1	1	1
FieldData\Smithsonian Pictures\Southern VA\Hatchlings\519626	2	PXL_20230210_191729799.dng	1529	PXL_20230210_191729799	dng	2	2	1
FieldData\Smithsonian Pictures\Southern VA\Hatchlings\519626	3	PXL_20230210_191731496.dng	1530	PXL_20230210_191731496	dng	3	3	1
FieldData\Smithsonian Pictures\Southern VA\Hatchlings\519626	4	PXL_20230210_191808647.dng	1531	PXL_20230210_191808647	dng	4	4	1
FieldData\Smithsonian Pictures\Southern VA\Hatchlings\519626	5	PXL_20230210_191810354.dng	1532	PXL_20230210_191810354	dng	5	5	1
FieldData\Smithsonian Pictures\Southern VA\Hatchlings\519626	6	PXL_20230210_191821175.dng	1533	PXL_20230210_191821175	dng	6	6	1
FieldData\Smithsonian Pictures\Southern VA\Hatchlings\519626	7	PXL_20230210_191824482.dng	1534	PXL_20230210_191824482	dng	7	7	1
FieldData\Smithsonian Pictures\Southern VA\Hatchlings\519626	8	PXL_20230210_191838078.dng	1535	PXL_20230210_191838078	dng	8	8	1
FieldData\Smithsonian Pictures\Southern VA\Hatchlings\519626	9	PXL_20230210_191839919.dng	1536	PXL_20230210_191839919	dng	9	9	1
FieldData\Smithsonian Pictures\Southern VA\Hatchlings\519626	10	PXL_20230210_191848058.dng	1537	PXL_20230210_191848058	dng	10	10	1
FieldData\Smithsonian Pictures\Southern VA\Hatchlings\519626	11	PXL_20230210_191848916.dng	1538	PXL_20230210_191848916	dng	11	11	1
FieldData\Smithsonian Pictures\Southern VA\Hatchlings\519627	1	PXL_20230210_204436062.dng	1539	PXL_20230210_204436062	dng	1	1	1
FieldData\Smithsonian Pictures\Southern VA\Hatchlings\519627	2	PXL_20230210_204439482.dng	1540	PXL_20230210_204439482	dng	2	2	1
FieldData\Smithsonian Pictures\Southern VA\Hatchlings\519627	3	PXL_20230210_204442256.dng	1541	PXL_20230210_204442256	dng	3	3	1
FieldData\Smithsonian Pictures\Southern VA\Hatchlings\519627	4	PXL_20230210_204458053.dng	1542	PXL_20230210_204458053	dng	4	4	1
FieldData\Smithsonian Pictures\Southern VA\Hatchlings\519627	5	PXL_20230210_204458904.dng	1543	PXL_20230210_204458904	dng	5	5	1
FieldData\Smithsonian Pictures\Southern VA\Hatchlings\519627	6	PXL_20230210_204506183.dng	1544	PXL_20230210_204506183	dng	6	6	1
FieldData\Smithsonian Pictures\Southern VA\Hatchlings\519627	7	PXL_20230210_204506911.dng	1545	PXL_20230210_204506911	dng	7	7	1
FieldData\Smithsonian Pictures\Southern VA\Hatchlings\519627	8	PXL_20230210_204521296.dng	1546	PXL_20230210_204521296	dng	8	8	1
FieldData\Smithsonian Pictures\Southern VA\Hatchlings\519627	9	PXL_20230210_204522016.dng	1547	PXL_20230210_204522016	dng	9	9	1
FieldData\Smithsonian Pictures\Southern VA\Hatchlings\519627	10	PXL_20230210_204529404.dng	1548	PXL_20230210_204529404	dng	10	10	1
FieldData\Smithsonian Pictures\Southern VA\Hatchlings\519627	11	PXL_20230210_204530246.dng	1549	PXL_20230210_204530246	dng	11	11	1
FieldData\Smithsonian Pictures\Southern VA\Hatchlings\519630	1	PXL_20230210_192657859.dng	1550	PXL_20230210_192657859	dng	1	1	1
FieldData\Smithsonian Pictures\Southern VA\Hatchlings\519630	2	PXL_20230210_192700532.dng	1551	PXL_20230210_192700532	dng	2	2	1
FieldData\Smithsonian Pictures\Southern VA\Hatchlings\519630	3	PXL_20230210_192703854.dng	1552	PXL_20230210_192703854	dng	3	3	1
FieldData\Smithsonian Pictures\Southern VA\Hatchlings\519630	4	PXL_20230210_192717493.dng	1553	PXL_20230210_192717493	dng	4	4	1
FieldData\Smithsonian Pictures\Southern VA\Hatchlings\519630	5	PXL_20230210_192718144.dng	1554	PXL_20230210_192718144	dng	5	5	1
FieldData\Smithsonian Pictures\Southern VA\Hatchlings\519630	6	PXL_20230210_192725719.dng	1555	PXL_20230210_192725719	dng	6	6	1
FieldData\Smithsonian Pictures\Southern VA\Hatchlings\519630	7	PXL_20230210_192726870.dng	1556	PXL_20230210_192726870	dng	7	7	1
FieldData\Smithsonian Pictures\Southern VA\Hatchlings\519630	8	PXL_20230210_192738589.dng	1557	PXL_20230210_192738589	dng	8	8	1
FieldData\Smithsonian Pictures\Southern VA\Hatchlings\519630	9	PXL_20230210_192739181.dng	1558	PXL_20230210_192739181	dng	9	9	1
FieldData\Smithsonian Pictures\Southern VA\Hatchlings\519630	10	PXL_20230210_192750930.dng	1559	PXL_20230210_192750930	dng	10	10	1
FieldData\Smithsonian Pictures\Southern VA\Hatchlings\519630	11	PXL_20230210_192752169.dng	1560	PXL_20230210_192752169	dng	11	11	1
FieldData\Smithsonian Pictures\Southern VA\Hatchlings\519631	1	PXL_20230210_202315320.dng	1561	PXL_20230210_202315320	dng	1	1	1
FieldData\Smithsonian Pictures\Southern VA\Hatchlings\519631	2	PXL_20230210_202317412.dng	1562	PXL_20230210_202317412	dng	2	2	1
FieldData\Smithsonian Pictures\Southern VA\Hatchlings\519631	3	PXL_20230210_202319503.dng	1563	PXL_20230210_202319503	dng	3	3	1
FieldData\Smithsonian Pictures\Southern VA\Hatchlings\519631	4	PXL_20230210_202334798.dng	1564	PXL_20230210_202334798	dng	4	4	1
FieldData\Smithsonian Pictures\Southern VA\Hatchlings\519631	5	PXL_20230210_202335784.dng	1565	PXL_20230210_202335784	dng	5	5	1
FieldData\Smithsonian Pictures\Southern VA\Hatchlings\519631	6	PXL_20230210_202343866.dng	1566	PXL_20230210_202343866	dng	6	6	1
FieldData\Smithsonian Pictures\Southern VA\Hatchlings\519631	7	PXL_20230210_202344608.dng	1567	PXL_20230210_202344608	dng	7	7	1
FieldData\Smithsonian Pictures\Southern VA\Hatchlings\519631	8	PXL_20230210_202359316.dng	1568	PXL_20230210_202359316	dng	8	8	1
FieldData\Smithsonian Pictures\Southern VA\Hatchlings\519631	9	PXL_20230210_202359964.dng	1569	PXL_20230210_202359964	dng	9	9	1
FieldData\Smithsonian Pictures\Southern VA\Hatchlings\519631	10	PXL_20230210_202410634.dng	1570	PXL_20230210_202410634	dng	10	10	1
FieldData\Smithsonian Pictures\Southern VA\Hatchlings\519631	11	PXL_20230210_202411398.dng	1571	PXL_20230210_202411398	dng	11	11	1
FieldData\Smithsonian Pictures\Southern VA\Hatchlings\519632	1	PXL_20230210_193958574.dng	1572	PXL_20230210_193958574	dng	1	1	1
FieldData\Smithsonian Pictures\Southern VA\Hatchlings\519632	2	PXL_20230210_194000788.dng	1573	PXL_20230210_194000788	dng	2	2	1
FieldData\Smithsonian Pictures\Southern VA\Hatchlings\519632	3	PXL_20230210_194002538.dng	1574	PXL_20230210_194002538	dng	3	3	1
FieldData\Smithsonian Pictures\Southern VA\Hatchlings\519632	4	PXL_20230210_194020003.dng	1575	PXL_20230210_194020003	dng	4	4	1
FieldData\Smithsonian Pictures\Southern VA\Hatchlings\519632	5	PXL_20230210_194020642.dng	1576	PXL_20230210_194020642	dng	5	5	1
FieldData\Smithsonian Pictures\Southern VA\Hatchlings\519632	6	PXL_20230210_194031398.dng	1577	PXL_20230210_194031398	dng	6	6	1
FieldData\Smithsonian Pictures\Southern VA\Hatchlings\519632	7	PXL_20230210_194032122.dng	1578	PXL_20230210_194032122	dng	7	7	1
FieldData\Smithsonian Pictures\Southern VA\Hatchlings\519632	8	PXL_20230210_194103923.dng	1579	PXL_20230210_194103923	dng	8	8	1
FieldData\Smithsonian Pictures\Southern VA\Hatchlings\519632	9	PXL_20230210_194104545.dng	1580	PXL_20230210_194104545	dng	9	9	1
FieldData\Smithsonian Pictures\Southern VA\Hatchlings\519632	10	PXL_20230210_194117879.dng	1581	PXL_20230210_194117879	dng	10	10	1
FieldData\Smithsonian Pictures\Southern VA\Hatchlings\519632	11	PXL_20230210_194119552.dng	1582	PXL_20230210_194119552	dng	11	11	1
FieldData\Smithsonian Pictures\Southern VA\Hatchlings\519633	1	PXL_20230210_193012635.dng	1583	PXL_20230210_193012635	dng	1	1	1
FieldData\Smithsonian Pictures\Southern VA\Hatchlings\519633	2	PXL_20230210_193015123.dng	1584	PXL_20230210_193015123	dng	2	2	1
FieldData\Smithsonian Pictures\Southern VA\Hatchlings\519633	3	PXL_20230210_193016540.dng	1585	PXL_20230210_193016540	dng	3	3	1
FieldData\Smithsonian Pictures\Southern VA\Hatchlings\519633	4	PXL_20230210_193028915.dng	1586	PXL_20230210_193028915	dng	4	4	1
FieldData\Smithsonian Pictures\Southern VA\Hatchlings\519633	5	PXL_20230210_193029672.dng	1587	PXL_20230210_193029672	dng	5	5	1
FieldData\Smithsonian Pictures\Southern VA\Hatchlings\519633	6	PXL_20230210_193040760.dng	1588	PXL_20230210_193040760	dng	6	6	1
FieldData\Smithsonian Pictures\Southern VA\Hatchlings\519633	7	PXL_20230210_193042743.dng	1589	PXL_20230210_193042743	dng	7	7	1
FieldData\Smithsonian Pictures\Southern VA\Hatchlings\519633	8	PXL_20230210_193048177.dng	1590	PXL_20230210_193048177	dng	8	8	1
FieldData\Smithsonian Pictures\Southern VA\Hatchlings\519633	9	PXL_20230210_193050142.dng	1591	PXL_20230210_193050142	dng	9	9	1
FieldData\Smithsonian Pictures\Southern VA\Hatchlings\519633	10	PXL_20230210_193106143.dng	1592	PXL_20230210_193106143	dng	10	10	1
FieldData\Smithsonian Pictures\Southern VA\Hatchlings\519633	11	PXL_20230210_193106864.dng	1593	PXL_20230210_193106864	dng	11	11	1
FieldData\Smithsonian Pictures\Southern VA\Hatchlings\519642	1	PXL_20230210_211938284.dng	1594	PXL_20230210_211938284	dng	1	1	1
FieldData\Smithsonian Pictures\Southern VA\Hatchlings\519642	2	PXL_20230210_211942724.dng	1595	PXL_20230210_211942724	dng	2	2	1
FieldData\Smithsonian Pictures\Southern VA\Hatchlings\519642	3	PXL_20230210_211945411.dng	1596	PXL_20230210_211945411	dng	3	3	1
FieldData\Smithsonian Pictures\Southern VA\Hatchlings\519642	4	PXL_20230210_212030439.dng	1597	PXL_20230210_212030439	dng	4	4	1
FieldData\Smithsonian Pictures\Southern VA\Hatchlings\519642	5	PXL_20230210_212031116.dng	1598	PXL_20230210_212031116	dng	5	5	1
FieldData\Smithsonian Pictures\Southern VA\Hatchlings\519642	6	PXL_20230210_212041828.dng	1599	PXL_20230210_212041828	dng	6	6	1
FieldData\Smithsonian Pictures\Southern VA\Hatchlings\519642	7	PXL_20230210_212042448.dng	1600	PXL_20230210_212042448	dng	7	7	1
FieldData\Smithsonian Pictures\Southern VA\Hatchlings\519642	8	PXL_20230210_212056086.dng	1601	PXL_20230210_212056086	dng	8	8	1
FieldData\Smithsonian Pictures\Southern VA\Hatchlings\519642	9	PXL_20230210_212056626.dng	1602	PXL_20230210_212056626	dng	9	9	1
FieldData\Smithsonian Pictures\Southern VA\Hatchlings\519642	10	PXL_20230210_212105455.dng	1603	PXL_20230210_212105455	dng	10	10	1
FieldData\Smithsonian Pictures\Southern VA\Hatchlings\519642	11	PXL_20230210_212106338.dng	1604	PXL_20230210_212106338	dng	11	11	1
FieldData\Smithsonian Pictures\Southern VA\Hatchlings\519643	1	PXL_20230210_205705311.dng	1605	PXL_20230210_205705311	dng	1	1	1
FieldData\Smithsonian Pictures\Southern VA\Hatchlings\519643	2	PXL_20230210_205707579.dng	1606	PXL_20230210_205707579	dng	2	2	1
FieldData\Smithsonian Pictures\Southern VA\Hatchlings\519643	3	PXL_20230210_205709534.dng	1607	PXL_20230210_205709534	dng	3	3	1
FieldData\Smithsonian Pictures\Southern VA\Hatchlings\519643	4	PXL_20230210_205730379.dng	1608	PXL_20230210_205730379	dng	4	4	1
FieldData\Smithsonian Pictures\Southern VA\Hatchlings\519643	5	PXL_20230210_205731044.dng	1609	PXL_20230210_205731044	dng	5	5	1
FieldData\Smithsonian Pictures\Southern VA\Hatchlings\519643	6	PXL_20230210_205739685.dng	1610	PXL_20230210_205739685	dng	6	6	1
FieldData\Smithsonian Pictures\Southern VA\Hatchlings\519643	7	PXL_20230210_205740615.dng	1611	PXL_20230210_205740615	dng	7	7	1
FieldData\Smithsonian Pictures\Southern VA\Hatchlings\519643	8	PXL_20230210_205750829.dng	1612	PXL_20230210_205750829	dng	8	8	1
FieldData\Smithsonian Pictures\Southern VA\Hatchlings\519643	9	PXL_20230210_205751489.dng	1613	PXL_20230210_205751489	dng	9	9	1
FieldData\Smithsonian Pictures\Southern VA\Hatchlings\519643	10	PXL_20230210_205806418.dng	1614	PXL_20230210_205806418	dng	10	10	1
FieldData\Smithsonian Pictures\Southern VA\Hatchlings\519643	11	PXL_20230210_205807354.dng	1615	PXL_20230210_205807354	dng	11	11	1
FieldData\Smithsonian Pictures\Southern VA\Hatchlings\519644	1	PXL_20230210_200200959.dng	1616	PXL_20230210_200200959	dng	1	1	1
FieldData\Smithsonian Pictures\Southern VA\Hatchlings\519644	2	PXL_20230210_200202488.dng	1617	PXL_20230210_200202488	dng	2	2	1
FieldData\Smithsonian Pictures\Southern VA\Hatchlings\519644	3	PXL_20230210_200203736.dng	1618	PXL_20230210_200203736	dng	3	3	1
FieldData\Smithsonian Pictures\Southern VA\Hatchlings\519644	4	PXL_20230210_200222187.dng	1619	PXL_20230210_200222187	dng	4	4	1
FieldData\Smithsonian Pictures\Southern VA\Hatchlings\519644	5	PXL_20230210_200222821.dng	1620	PXL_20230210_200222821	dng	5	5	1
FieldData\Smithsonian Pictures\Southern VA\Hatchlings\519644	6	PXL_20230210_200231516.dng	1621	PXL_20230210_200231516	dng	6	6	1
FieldData\Smithsonian Pictures\Southern VA\Hatchlings\519644	7	PXL_20230210_200232117.dng	1622	PXL_20230210_200232117	dng	7	7	1
FieldData\Smithsonian Pictures\Southern VA\Hatchlings\519644	8	PXL_20230210_200244694.dng	1623	PXL_20230210_200244694	dng	8	8	1
FieldData\Smithsonian Pictures\Southern VA\Hatchlings\519644	9	PXL_20230210_200245396.dng	1624	PXL_20230210_200245396	dng	9	9	1
FieldData\Smithsonian Pictures\Southern VA\Hatchlings\519644	10	PXL_20230210_200256879.dng	1625	PXL_20230210_200256879	dng	10	10	1
FieldData\Smithsonian Pictures\Southern VA\Hatchlings\519644	11	PXL_20230210_200257493.dng	1626	PXL_20230210_200257493	dng	11	11	1
FieldData\Smithsonian Pictures\Southern VA\Hatchlings\519646	1	PXL_20230210_211445356.dng	1627	PXL_20230210_211445356	dng	1	1	1
FieldData\Smithsonian Pictures\Southern VA\Hatchlings\519646	2	PXL_20230210_211447311.dng	1628	PXL_20230210_211447311	dng	2	2	1
FieldData\Smithsonian Pictures\Southern VA\Hatchlings\519646	3	PXL_20230210_211449317.dng	1629	PXL_20230210_211449317	dng	3	3	1
FieldData\Smithsonian Pictures\Southern VA\Hatchlings\519646	4	PXL_20230210_211503107.dng	1630	PXL_20230210_211503107	dng	4	4	1
FieldData\Smithsonian Pictures\Southern VA\Hatchlings\519646	5	PXL_20230210_211503789.dng	1631	PXL_20230210_211503789	dng	5	5	1
FieldData\Smithsonian Pictures\Southern VA\Hatchlings\519646	6	PXL_20230210_211514344.dng	1632	PXL_20230210_211514344	dng	6	6	1
FieldData\Smithsonian Pictures\Southern VA\Hatchlings\519646	7	PXL_20230210_211514990.dng	1633	PXL_20230210_211514990	dng	7	7	1
FieldData\Smithsonian Pictures\Southern VA\Hatchlings\519646	8	PXL_20230210_211524156.dng	1634	PXL_20230210_211524156	dng	8	8	1
FieldData\Smithsonian Pictures\Southern VA\Hatchlings\519646	9	PXL_20230210_211524746.dng	1635	PXL_20230210_211524746	dng	9	9	1
FieldData\Smithsonian Pictures\Southern VA\Hatchlings\519646	10	PXL_20230210_211537327.dng	1636	PXL_20230210_211537327	dng	10	10	1
FieldData\Smithsonian Pictures\Southern VA\Hatchlings\519646	11	PXL_20230210_211538382.dng	1637	PXL_20230210_211538382	dng	11	11	1
FieldData\Smithsonian Pictures\Southern VA\Hatchlings\519647	1	PXL_20230210_203251001.dng	1638	PXL_20230210_203251001	dng	1	1	1
FieldData\Smithsonian Pictures\Southern VA\Hatchlings\519647	2	PXL_20230210_203253750.dng	1639	PXL_20230210_203253750	dng	2	2	1
FieldData\Smithsonian Pictures\Southern VA\Hatchlings\519647	3	PXL_20230210_203255624.dng	1640	PXL_20230210_203255624	dng	3	3	1
FieldData\Smithsonian Pictures\Southern VA\Hatchlings\519647	4	PXL_20230210_203312228.dng	1641	PXL_20230210_203312228	dng	4	4	1
FieldData\Smithsonian Pictures\Southern VA\Hatchlings\519647	5	PXL_20230210_203313818.dng	1642	PXL_20230210_203313818	dng	5	5	1
FieldData\Smithsonian Pictures\Southern VA\Hatchlings\519647	6	PXL_20230210_203327156.dng	1643	PXL_20230210_203327156	dng	6	6	1
FieldData\Smithsonian Pictures\Southern VA\Hatchlings\519647	7	PXL_20230210_203327835.dng	1644	PXL_20230210_203327835	dng	7	7	1
FieldData\Smithsonian Pictures\Southern VA\Hatchlings\519647	8	PXL_20230210_203340391.dng	1645	PXL_20230210_203340391	dng	8	8	1
FieldData\Smithsonian Pictures\Southern VA\Hatchlings\519647	9	PXL_20230210_203341261.dng	1646	PXL_20230210_203341261	dng	9	9	1
FieldData\Smithsonian Pictures\Southern VA\Hatchlings\519647	10	PXL_20230210_203353416.dng	1647	PXL_20230210_203353416	dng	10	10	1
FieldData\Smithsonian Pictures\Southern VA\Hatchlings\519647	11	PXL_20230210_203354789.dng	1648	PXL_20230210_203354789	dng	11	11	1
FieldData\Smithsonian Pictures\Southern VA\Hatchlings\519649	1	PXL_20230210_195312678.dng	1649	PXL_20230210_195312678	dng	1	1	1
FieldData\Smithsonian Pictures\Southern VA\Hatchlings\519649	2	PXL_20230210_195314119.dng	1650	PXL_20230210_195314119	dng	2	2	1
FieldData\Smithsonian Pictures\Southern VA\Hatchlings\519649	3	PXL_20230210_195317356.dng	1651	PXL_20230210_195317356	dng	3	3	1
FieldData\Smithsonian Pictures\Southern VA\Hatchlings\519649	4	PXL_20230210_195341567.dng	1652	PXL_20230210_195341567	dng	4	4	1
FieldData\Smithsonian Pictures\Southern VA\Hatchlings\519649	5	PXL_20230210_195342246.dng	1653	PXL_20230210_195342246	dng	5	5	1
FieldData\Smithsonian Pictures\Southern VA\Hatchlings\519649	6	PXL_20230210_195354943.dng	1654	PXL_20230210_195354943	dng	6	6	1
FieldData\Smithsonian Pictures\Southern VA\Hatchlings\519649	7	PXL_20230210_195355578.dng	1655	PXL_20230210_195355578	dng	7	7	1
FieldData\Smithsonian Pictures\Southern VA\Hatchlings\519649	8	PXL_20230210_195404826.dng	1656	PXL_20230210_195404826	dng	8	8	1
FieldData\Smithsonian Pictures\Southern VA\Hatchlings\519649	9	PXL_20230210_195407123.dng	1657	PXL_20230210_195407123	dng	9	9	1
FieldData\Smithsonian Pictures\Southern VA\Hatchlings\519649	10	PXL_20230210_195422587.dng	1658	PXL_20230210_195422587	dng	10	10	1
FieldData\Smithsonian Pictures\Southern VA\Hatchlings\519649	11	PXL_20230210_195424920.dng	1659	PXL_20230210_195424920	dng	11	11	1
FieldData\Smithsonian Pictures\Southern VA\Hatchlings\519649	12	PXL_20230210_195425537.dng	1660	PXL_20230210_195425537	dng	12	12	1
FieldData\Smithsonian Pictures\Southern VA\Hatchlings\519652	1	PXL_20230210_192359673.dng	1661	PXL_20230210_192359673	dng	1	1	1
FieldData\Smithsonian Pictures\Southern VA\Hatchlings\519652	2	PXL_20230210_192402129.dng	1662	PXL_20230210_192402129	dng	2	2	1
FieldData\Smithsonian Pictures\Southern VA\Hatchlings\519652	3	PXL_20230210_192403792.dng	1663	PXL_20230210_192403792	dng	3	3	1
FieldData\Smithsonian Pictures\Southern VA\Hatchlings\519652	4	PXL_20230210_192423736.dng	1664	PXL_20230210_192423736	dng	4	4	1
FieldData\Smithsonian Pictures\Southern VA\Hatchlings\519652	5	PXL_20230210_192426045.dng	1665	PXL_20230210_192426045	dng	5	5	1
FieldData\Smithsonian Pictures\Southern VA\Hatchlings\519652	6	PXL_20230210_192432322.dng	1666	PXL_20230210_192432322	dng	6	6	1
FieldData\Smithsonian Pictures\Southern VA\Hatchlings\519652	7	PXL_20230210_192433068.dng	1667	PXL_20230210_192433068	dng	7	7	1
FieldData\Smithsonian Pictures\Southern VA\Hatchlings\519652	8	PXL_20230210_192441316.dng	1668	PXL_20230210_192441316	dng	8	8	1
FieldData\Smithsonian Pictures\Southern VA\Hatchlings\519652	9	PXL_20230210_192441987.dng	1669	PXL_20230210_192441987	dng	9	9	1
FieldData\Smithsonian Pictures\Southern VA\Hatchlings\519652	10	PXL_20230210_192458805.dng	1670	PXL_20230210_192458805	dng	10	10	1
FieldData\Smithsonian Pictures\Southern VA\Hatchlings\519652	11	PXL_20230210_192459617.dng	1671	PXL_20230210_192459617	dng	11	11	1
FieldData\Smithsonian Pictures\Southern VA\Hatchlings\519653	1	PXL_20230210_195703767.dng	1672	PXL_20230210_195703767	dng	1	1	1
FieldData\Smithsonian Pictures\Southern VA\Hatchlings\519653	2	PXL_20230210_195705340.dng	1673	PXL_20230210_195705340	dng	2	2	1
FieldData\Smithsonian Pictures\Southern VA\Hatchlings\519653	3	PXL_20230210_195706390.dng	1674	PXL_20230210_195706390	dng	3	3	1
FieldData\Smithsonian Pictures\Southern VA\Hatchlings\519653	4	PXL_20230210_195721065.dng	1675	PXL_20230210_195721065	dng	4	4	1
FieldData\Smithsonian Pictures\Southern VA\Hatchlings\519653	5	PXL_20230210_195721637.dng	1676	PXL_20230210_195721637	dng	5	5	1
FieldData\Smithsonian Pictures\Southern VA\Hatchlings\519653	6	PXL_20230210_195733223.dng	1677	PXL_20230210_195733223	dng	6	6	1
FieldData\Smithsonian Pictures\Southern VA\Hatchlings\519653	7	PXL_20230210_195734666.dng	1678	PXL_20230210_195734666	dng	7	7	1
FieldData\Smithsonian Pictures\Southern VA\Hatchlings\519653	8	PXL_20230210_195742972.dng	1679	PXL_20230210_195742972	dng	8	8	1
FieldData\Smithsonian Pictures\Southern VA\Hatchlings\519653	9	PXL_20230210_195743743.dng	1680	PXL_20230210_195743743	dng	9	9	1
FieldData\Smithsonian Pictures\Southern VA\Hatchlings\519653	10	PXL_20230210_195754568.dng	1681	PXL_20230210_195754568	dng	10	10	1
FieldData\Smithsonian Pictures\Southern VA\Hatchlings\519653	11	PXL_20230210_195755283.dng	1682	PXL_20230210_195755283	dng	11	11	1
FieldData\Smithsonian Pictures\Southern VA\Hatchlings\519654	1	PXL_20230210_204846398.dng	1683	PXL_20230210_204846398	dng	1	1	1
FieldData\Smithsonian Pictures\Southern VA\Hatchlings\519654	2	PXL_20230210_204848678.dng	1684	PXL_20230210_204848678	dng	2	2	1
FieldData\Smithsonian Pictures\Southern VA\Hatchlings\519654	3	PXL_20230210_204849982.dng	1685	PXL_20230210_204849982	dng	3	3	1
FieldData\Smithsonian Pictures\Southern VA\Hatchlings\519654	4	PXL_20230210_204905856.dng	1686	PXL_20230210_204905856	dng	4	4	1
FieldData\Smithsonian Pictures\Southern VA\Hatchlings\519654	5	PXL_20230210_204906974.dng	1687	PXL_20230210_204906974	dng	5	5	1
FieldData\Smithsonian Pictures\Southern VA\Hatchlings\519654	6	PXL_20230210_204917024.dng	1688	PXL_20230210_204917024	dng	6	6	1
FieldData\Smithsonian Pictures\Southern VA\Hatchlings\519654	7	PXL_20230210_204917803.dng	1689	PXL_20230210_204917803	dng	7	7	1
FieldData\Smithsonian Pictures\Southern VA\Hatchlings\519654	8	PXL_20230210_204932401.dng	1690	PXL_20230210_204932401	dng	8	8	1
FieldData\Smithsonian Pictures\Southern VA\Hatchlings\519654	9	PXL_20230210_204933159.dng	1691	PXL_20230210_204933159	dng	9	9	1
FieldData\Smithsonian Pictures\Southern VA\Hatchlings\519654	10	PXL_20230210_204946416.dng	1692	PXL_20230210_204946416	dng	10	10	1
FieldData\Smithsonian Pictures\Southern VA\Hatchlings\519654	11	PXL_20230210_204947558.dng	1693	PXL_20230210_204947558	dng	11	11	1
FieldData\Smithsonian Pictures\Southern VA\Hatchlings\519655	1	PXL_20230210_200437089.dng	1694	PXL_20230210_200437089	dng	1	1	1
FieldData\Smithsonian Pictures\Southern VA\Hatchlings\519655	2	PXL_20230210_200439730.dng	1695	PXL_20230210_200439730	dng	2	2	1
FieldData\Smithsonian Pictures\Southern VA\Hatchlings\519655	3	PXL_20230210_200441607.dng	1696	PXL_20230210_200441607	dng	3	3	1
FieldData\Smithsonian Pictures\Southern VA\Hatchlings\519655	4	PXL_20230210_200455348.dng	1697	PXL_20230210_200455348	dng	4	4	1
FieldData\Smithsonian Pictures\Southern VA\Hatchlings\519655	5	PXL_20230210_200456265.dng	1698	PXL_20230210_200456265	dng	5	5	1
FieldData\Smithsonian Pictures\Southern VA\Hatchlings\519655	6	PXL_20230210_200503910.dng	1699	PXL_20230210_200503910	dng	6	6	1
FieldData\Smithsonian Pictures\Southern VA\Hatchlings\519655	7	PXL_20230210_200504589.dng	1700	PXL_20230210_200504589	dng	7	7	1
FieldData\Smithsonian Pictures\Southern VA\Hatchlings\519655	8	PXL_20230210_200517554.dng	1701	PXL_20230210_200517554	dng	8	8	1
FieldData\Smithsonian Pictures\Southern VA\Hatchlings\519655	9	PXL_20230210_200518281.dng	1702	PXL_20230210_200518281	dng	9	9	1
FieldData\Smithsonian Pictures\Southern VA\Hatchlings\519655	10	PXL_20230210_200529232.dng	1703	PXL_20230210_200529232	dng	10	10	1
FieldData\Smithsonian Pictures\Southern VA\Hatchlings\519655	11	PXL_20230210_200530052.dng	1704	PXL_20230210_200530052	dng	11	11	1
FieldData\Smithsonian Pictures\Southern VA\Hatchlings\519656	1	PXL_20230210_193653306.dng	1705	PXL_20230210_193653306	dng	1	1	1
FieldData\Smithsonian Pictures\Southern VA\Hatchlings\519656	2	PXL_20230210_193655354.dng	1706	PXL_20230210_193655354	dng	2	2	1
FieldData\Smithsonian Pictures\Southern VA\Hatchlings\519656	3	PXL_20230210_193658146.dng	1707	PXL_20230210_193658146	dng	3	3	1
FieldData\Smithsonian Pictures\Southern VA\Hatchlings\519656	4	PXL_20230210_193718185.dng	1708	PXL_20230210_193718185	dng	4	4	1
FieldData\Smithsonian Pictures\Southern VA\Hatchlings\519656	5	PXL_20230210_193718985.dng	1709	PXL_20230210_193718985	dng	5	5	1
FieldData\Smithsonian Pictures\Southern VA\Hatchlings\519656	6	PXL_20230210_193730775.dng	1710	PXL_20230210_193730775	dng	6	6	1
FieldData\Smithsonian Pictures\Southern VA\Hatchlings\519656	7	PXL_20230210_193732619.dng	1711	PXL_20230210_193732619	dng	7	7	1
FieldData\Smithsonian Pictures\Southern VA\Hatchlings\519656	8	PXL_20230210_193751951.dng	1712	PXL_20230210_193751951	dng	8	8	1
FieldData\Smithsonian Pictures\Southern VA\Hatchlings\519656	9	PXL_20230210_193752913.dng	1713	PXL_20230210_193752913	dng	9	9	1
FieldData\Smithsonian Pictures\Southern VA\Hatchlings\519656	10	PXL_20230210_193801698.dng	1714	PXL_20230210_193801698	dng	10	10	1
FieldData\Smithsonian Pictures\Southern VA\Hatchlings\519656	11	PXL_20230210_193802495.dng	1715	PXL_20230210_193802495	dng	11	11	1
FieldData\Smithsonian Pictures\Southern VA\Hatchlings\519661	1	PXL_20230210_202708821.dng	1716	PXL_20230210_202708821	dng	1	1	1
FieldData\Smithsonian Pictures\Southern VA\Hatchlings\519661	2	PXL_20230210_202713550.dng	1717	PXL_20230210_202713550	dng	2	2	1
FieldData\Smithsonian Pictures\Southern VA\Hatchlings\519661	3	PXL_20230210_202714753.dng	1718	PXL_20230210_202714753	dng	3	3	1
FieldData\Smithsonian Pictures\Southern VA\Hatchlings\519661	4	PXL_20230210_202729369.dng	1719	PXL_20230210_202729369	dng	4	4	1
FieldData\Smithsonian Pictures\Southern VA\Hatchlings\519661	5	PXL_20230210_202730237.dng	1720	PXL_20230210_202730237	dng	5	5	1
FieldData\Smithsonian Pictures\Southern VA\Hatchlings\519661	6	PXL_20230210_202739284.dng	1721	PXL_20230210_202739284	dng	6	6	1
FieldData\Smithsonian Pictures\Southern VA\Hatchlings\519661	7	PXL_20230210_202740506.dng	1722	PXL_20230210_202740506	dng	7	7	1
FieldData\Smithsonian Pictures\Southern VA\Hatchlings\519661	8	PXL_20230210_202751248.dng	1723	PXL_20230210_202751248	dng	8	8	1
FieldData\Smithsonian Pictures\Southern VA\Hatchlings\519661	9	PXL_20230210_202751988.dng	1724	PXL_20230210_202751988	dng	9	9	1
FieldData\Smithsonian Pictures\Southern VA\Hatchlings\519661	10	PXL_20230210_202802530.dng	1725	PXL_20230210_202802530	dng	10	10	1
FieldData\Smithsonian Pictures\Southern VA\Hatchlings\519661	11	PXL_20230210_202804116.dng	1726	PXL_20230210_202804116	dng	11	11	1
FieldData\Smithsonian Pictures\Southern VA\Hatchlings\519662	1	PXL_20230210_203005989.dng	1727	PXL_20230210_203005989	dng	1	1	1
FieldData\Smithsonian Pictures\Southern VA\Hatchlings\519662	2	PXL_20230210_203006869.dng	1728	PXL_20230210_203006869	dng	2	2	1
FieldData\Smithsonian Pictures\Southern VA\Hatchlings\519662	3	PXL_20230210_203009627.dng	1729	PXL_20230210_203009627	dng	3	3	1
FieldData\Smithsonian Pictures\Southern VA\Hatchlings\519662	4	PXL_20230210_203025358.dng	1730	PXL_20230210_203025358	dng	4	4	1
FieldData\Smithsonian Pictures\Southern VA\Hatchlings\519662	5	PXL_20230210_203026090.dng	1731	PXL_20230210_203026090	dng	5	5	1
FieldData\Smithsonian Pictures\Southern VA\Hatchlings\519662	6	PXL_20230210_203036503.dng	1732	PXL_20230210_203036503	dng	6	6	1
FieldData\Smithsonian Pictures\Southern VA\Hatchlings\519662	7	PXL_20230210_203037118.dng	1733	PXL_20230210_203037118	dng	7	7	1
FieldData\Smithsonian Pictures\Southern VA\Hatchlings\519662	8	PXL_20230210_203047748.dng	1734	PXL_20230210_203047748	dng	8	8	1
FieldData\Smithsonian Pictures\Southern VA\Hatchlings\519662	9	PXL_20230210_203048383.dng	1735	PXL_20230210_203048383	dng	9	9	1
FieldData\Smithsonian Pictures\Southern VA\Hatchlings\519662	10	PXL_20230210_203100412.dng	1736	PXL_20230210_203100412	dng	10	10	1
FieldData\Smithsonian Pictures\Southern VA\Hatchlings\519662	11	PXL_20230210_203101061.dng	1737	PXL_20230210_203101061	dng	11	11	1
FieldData\Smithsonian Pictures\Southern VA\Hatchlings\519663	1	PXL_20230210_191523204.dng	1738	PXL_20230210_191523204	dng	1	1	1
FieldData\Smithsonian Pictures\Southern VA\Hatchlings\519663	2	PXL_20230210_191523951.dng	1739	PXL_20230210_191523951	dng	2	2	1
FieldData\Smithsonian Pictures\Southern VA\Hatchlings\519663	3	PXL_20230210_191526300.dng	1740	PXL_20230210_191526300	dng	3	3	1
FieldData\Smithsonian Pictures\Southern VA\Hatchlings\519663	4	PXL_20230210_191538519.dng	1741	PXL_20230210_191538519	dng	4	4	1
FieldData\Smithsonian Pictures\Southern VA\Hatchlings\519663	5	PXL_20230210_191539122.dng	1742	PXL_20230210_191539122	dng	5	5	1
FieldData\Smithsonian Pictures\Southern VA\Hatchlings\519663	6	PXL_20230210_191546955.dng	1743	PXL_20230210_191546955	dng	6	6	1
FieldData\Smithsonian Pictures\Southern VA\Hatchlings\519663	7	PXL_20230210_191547818.dng	1744	PXL_20230210_191547818	dng	7	7	1
FieldData\Smithsonian Pictures\Southern VA\Hatchlings\519663	8	PXL_20230210_191558627.dng	1745	PXL_20230210_191558627	dng	8	8	1
FieldData\Smithsonian Pictures\Southern VA\Hatchlings\519663	9	PXL_20230210_191559262.dng	1746	PXL_20230210_191559262	dng	9	9	1
FieldData\Smithsonian Pictures\Southern VA\Hatchlings\519663	10	PXL_20230210_191611171.dng	1747	PXL_20230210_191611171	dng	10	10	1
FieldData\Smithsonian Pictures\Southern VA\Hatchlings\519663	11	PXL_20230210_191611808.dng	1748	PXL_20230210_191611808	dng	11	11	1
FieldData\Smithsonian Pictures\Southern VA\Hatchlings\519664	1	PXL_20230210_194751502.dng	1749	PXL_20230210_194751502	dng	1	1	1
FieldData\Smithsonian Pictures\Southern VA\Hatchlings\519664	2	PXL_20230210_194752617.dng	1750	PXL_20230210_194752617	dng	2	2	1
FieldData\Smithsonian Pictures\Southern VA\Hatchlings\519664	3	PXL_20230210_194753504.dng	1751	PXL_20230210_194753504	dng	3	3	1
FieldData\Smithsonian Pictures\Southern VA\Hatchlings\519664	4	PXL_20230210_194819583.dng	1752	PXL_20230210_194819583	dng	4	4	1
FieldData\Smithsonian Pictures\Southern VA\Hatchlings\519664	5	PXL_20230210_194822133.dng	1753	PXL_20230210_194822133	dng	5	5	1
FieldData\Smithsonian Pictures\Southern VA\Hatchlings\519664	6	PXL_20230210_194833940.dng	1754	PXL_20230210_194833940	dng	6	6	1
FieldData\Smithsonian Pictures\Southern VA\Hatchlings\519664	7	PXL_20230210_194834644.dng	1755	PXL_20230210_194834644	dng	7	7	1
FieldData\Smithsonian Pictures\Southern VA\Hatchlings\519664	8	PXL_20230210_194857154.dng	1756	PXL_20230210_194857154	dng	8	8	1
FieldData\Smithsonian Pictures\Southern VA\Hatchlings\519664	9	PXL_20230210_194857811.dng	1757	PXL_20230210_194857811	dng	9	9	1
FieldData\Smithsonian Pictures\Southern VA\Hatchlings\519665	1	PXL_20230210_210647249.dng	1758	PXL_20230210_210647249	dng	1	1	1
FieldData\Smithsonian Pictures\Southern VA\Hatchlings\519665	2	PXL_20230210_210650755.dng	1759	PXL_20230210_210650755	dng	2	2	1
FieldData\Smithsonian Pictures\Southern VA\Hatchlings\519665	3	PXL_20230210_210652965.dng	1760	PXL_20230210_210652965	dng	3	3	1
FieldData\Smithsonian Pictures\Southern VA\Hatchlings\519665	4	PXL_20230210_210714523.dng	1761	PXL_20230210_210714523	dng	4	4	1
FieldData\Smithsonian Pictures\Southern VA\Hatchlings\519665	5	PXL_20230210_210715211.dng	1762	PXL_20230210_210715211	dng	5	5	1
FieldData\Smithsonian Pictures\Southern VA\Hatchlings\519665	6	PXL_20230210_210733097.dng	1763	PXL_20230210_210733097	dng	6	6	1
FieldData\Smithsonian Pictures\Southern VA\Hatchlings\519665	7	PXL_20230210_210734290.dng	1764	PXL_20230210_210734290	dng	7	7	1
FieldData\Smithsonian Pictures\Southern VA\Hatchlings\519665	8	PXL_20230210_210746439.dng	1765	PXL_20230210_210746439	dng	8	8	1
FieldData\Smithsonian Pictures\Southern VA\Hatchlings\519665	9	PXL_20230210_210747093.dng	1766	PXL_20230210_210747093	dng	9	9	1
FieldData\Smithsonian Pictures\Southern VA\Hatchlings\519665	10	PXL_20230210_210758291.dng	1767	PXL_20230210_210758291	dng	10	10	1
FieldData\Smithsonian Pictures\Southern VA\Hatchlings\519665	11	PXL_20230210_210759154.dng	1768	PXL_20230210_210759154	dng	11	11	1
FieldData\Smithsonian Pictures\Southern VA\Hatchlings\519666	1	PXL_20230210_201116894.dng	1769	PXL_20230210_201116894	dng	1	1	1
FieldData\Smithsonian Pictures\Southern VA\Hatchlings\519666	2	PXL_20230210_201118922.dng	1770	PXL_20230210_201118922	dng	2	2	1
FieldData\Smithsonian Pictures\Southern VA\Hatchlings\519666	3	PXL_20230210_201120697.dng	1771	PXL_20230210_201120697	dng	3	3	1
FieldData\Smithsonian Pictures\Southern VA\Hatchlings\519666	4	PXL_20230210_201136715.dng	1772	PXL_20230210_201136715	dng	4	4	1
FieldData\Smithsonian Pictures\Southern VA\Hatchlings\519666	5	PXL_20230210_201137371.dng	1773	PXL_20230210_201137371	dng	5	5	1
FieldData\Smithsonian Pictures\Southern VA\Hatchlings\519666	6	PXL_20230210_201148423.dng	1774	PXL_20230210_201148423	dng	6	6	1
FieldData\Smithsonian Pictures\Southern VA\Hatchlings\519666	7	PXL_20230210_201148978.dng	1775	PXL_20230210_201148978	dng	7	7	1
FieldData\Smithsonian Pictures\Southern VA\Hatchlings\519666	8	PXL_20230210_201203171.dng	1776	PXL_20230210_201203171	dng	8	8	1
FieldData\Smithsonian Pictures\Southern VA\Hatchlings\519666	9	PXL_20230210_201203808.dng	1777	PXL_20230210_201203808	dng	9	9	1
FieldData\Smithsonian Pictures\Southern VA\Hatchlings\519666	10	PXL_20230210_201217326.dng	1778	PXL_20230210_201217326	dng	10	10	1
FieldData\Smithsonian Pictures\Southern VA\Hatchlings\519666	11	PXL_20230210_201218741.dng	1779	PXL_20230210_201218741	dng	11	11	1
FieldData\Smithsonian Pictures\Southern VA\Hatchlings\519666	12	PXL_20230210_201219500.dng	1780	PXL_20230210_201219500	dng	12	12	1
FieldData\Smithsonian Pictures\Southern VA\Juvenile\497299	1	PXL_20230208_202317920.dng	1781	PXL_20230208_202317920	dng	1	1	1
FieldData\Smithsonian Pictures\Southern VA\Juvenile\497299	2	PXL_20230208_202320747.dng	1782	PXL_20230208_202320747	dng	2	2	1
FieldData\Smithsonian Pictures\Southern VA\Juvenile\497299	3	PXL_20230208_202322847.dng	1783	PXL_20230208_202322847	dng	3	3	1
FieldData\Smithsonian Pictures\Southern VA\Juvenile\497299	4	PXL_20230208_202352483.dng	1784	PXL_20230208_202352483	dng	4	4	1
FieldData\Smithsonian Pictures\Southern VA\Juvenile\497299	5	PXL_20230208_202353304.dng	1785	PXL_20230208_202353304	dng	5	5	1
FieldData\Smithsonian Pictures\Southern VA\Juvenile\497299	6	PXL_20230208_202359909.dng	1786	PXL_20230208_202359909	dng	6	6	1
FieldData\Smithsonian Pictures\Southern VA\Juvenile\497299	7	PXL_20230208_202400721.dng	1787	PXL_20230208_202400721	dng	7	7	1
FieldData\Smithsonian Pictures\Southern VA\Juvenile\497299	8	PXL_20230208_202409493.dng	1788	PXL_20230208_202409493	dng	8	8	1
FieldData\Smithsonian Pictures\Southern VA\Juvenile\497299	9	PXL_20230208_202411413.dng	1789	PXL_20230208_202411413	dng	9	9	1
FieldData\Smithsonian Pictures\Southern VA\Juvenile\497299	10	PXL_20230208_202420377.dng	1790	PXL_20230208_202420377	dng	10	10	1
FieldData\Smithsonian Pictures\Southern VA\Juvenile\497299	11	PXL_20230208_202426861.dng	1791	PXL_20230208_202426861	dng	11	11	1
FieldData\Smithsonian Pictures\Southern VA\Juvenile\497300	1	PXL_20230208_201942855.dng	1792	PXL_20230208_201942855	dng	1	1	1
FieldData\Smithsonian Pictures\Southern VA\Juvenile\497300	2	PXL_20230208_201947236.dng	1793	PXL_20230208_201947236	dng	2	2	1
FieldData\Smithsonian Pictures\Southern VA\Juvenile\497300	3	PXL_20230208_201949321.dng	1794	PXL_20230208_201949321	dng	3	3	1
FieldData\Smithsonian Pictures\Southern VA\Juvenile\497300	4	PXL_20230208_202005992.dng	1795	PXL_20230208_202005992	dng	4	4	1
FieldData\Smithsonian Pictures\Southern VA\Juvenile\497300	5	PXL_20230208_202006776.dng	1796	PXL_20230208_202006776	dng	5	5	1
FieldData\Smithsonian Pictures\Southern VA\Juvenile\497300	6	PXL_20230208_202014300.dng	1797	PXL_20230208_202014300	dng	6	6	1
FieldData\Smithsonian Pictures\Southern VA\Juvenile\497300	7	PXL_20230208_202015278.dng	1798	PXL_20230208_202015278	dng	7	7	1
FieldData\Smithsonian Pictures\Southern VA\Juvenile\497300	8	PXL_20230208_202028512.dng	1799	PXL_20230208_202028512	dng	8	8	1
FieldData\Smithsonian Pictures\Southern VA\Juvenile\497300	9	PXL_20230208_202029332.dng	1800	PXL_20230208_202029332	dng	9	9	1
FieldData\Smithsonian Pictures\Southern VA\Juvenile\497300	10	PXL_20230208_202047277.dng	1801	PXL_20230208_202047277	dng	10	10	1
FieldData\Smithsonian Pictures\Southern VA\Juvenile\497300	11	PXL_20230208_202048426.dng	1802	PXL_20230208_202048426	dng	11	11	1
160

## Sheet: ImagesAndLabels
											2023 Number		2024 Number
FieldData\Smithsonian Pictures\NOVA-DC-MD\Adult\45779	1	FieldData	Smithsonian Pictures	NOVA-DC-MD	Adult	id45779	PXL_20230214_183639129.dng	TOP	981	1001	1001	1	1001		98
FieldData\Smithsonian Pictures\Central VA (near Richmond)\Adult\497243	1	FieldData	Smithsonian Pictures	Central VA (near Richmond)	Adult	id497243	PXL_20230208_192438763.dng	TOP	425	1002	1002	1	1002
FieldData\Smithsonian Pictures\NOVA-DC-MD\Juvenile\26172	1	FieldData	Smithsonian Pictures	NOVA-DC-MD	Juvenile	id26172	PXL_20230201_204511533.dng	TOP	1175	1003	1003	0	0
FieldData\Smithsonian Pictures\NOVA-DC-MD\Juvenile\141486	1	FieldData	Smithsonian Pictures	NOVA-DC-MD	Juvenile	id141486	PXL_20230131_200700233.dng	TOP	1055	1004	1004	1	1003
FieldData\Smithsonian Pictures\NOVA-DC-MD\Juvenile\230328	1	FieldData	Smithsonian Pictures	NOVA-DC-MD	Juvenile	id230328	PXL_20230131_204012746.dng	TOP	1165	1005	1005	0	0
FieldData\Clifton Pictures\Individuals\7-5_94	1	FieldData	Clifton Pictures		Individuals	id7-5_94	PXL_20220705_161049910.dng	TOP	71	1006	1006	0	0
FieldData\Smithsonian Pictures\NOVA-DC-MD\Adult\288187	1	FieldData	Smithsonian Pictures	NOVA-DC-MD	Adult	id288187	PXL_20230207_174721759.dng	TOP	832	1007	1007	1	1004
FieldData\Smithsonian Pictures\NOVA-DC-MD\Juvenile\54750	1	FieldData	Smithsonian Pictures	NOVA-DC-MD	Juvenile	id54750	aPXL_20230207_205316926.dng	TOP	1294	1008	1008	0	0
FieldData\Smithsonian Pictures\NOVA-DC-MD\Adult\42825	1	FieldData	Smithsonian Pictures	NOVA-DC-MD	Adult	id42825	PXL_20230125_185501109.dng	TOP	951	1009	1009	1	1005
FieldData\Smithsonian Pictures\Southern VA\Hatchlings\519654	1	FieldData	Smithsonian Pictures	Southern VA	Hatchlings	id519654	PXL_20230210_204846398.dng	TOP	1683	1010	1010	0	0
FieldData\Smithsonian Pictures\NOVA-DC-MD\Adult\20544	1	FieldData	Smithsonian Pictures	NOVA-DC-MD	Adult	id20544	PXL_20230207_170646891.dng	TOP	652	1011	1011	1	1006
FieldData\Smithsonian Pictures\NOVA-DC-MD\Adult\22608	1	FieldData	Smithsonian Pictures	NOVA-DC-MD	Adult	id22608	aPXL_20230214_191709392.dng	TOP	681	1012	1012	1	1007
FieldData\Smithsonian Pictures\NOVA-DC-MD\Juvenile\16229	1	FieldData	Smithsonian Pictures	NOVA-DC-MD	Juvenile	id16229	PXL_20230201_185458738.dng	TOP	1075	1013	1013	0	0
FieldData\Smithsonian Pictures\Central VA (near Richmond)\Juvenile\519622	1	FieldData	Smithsonian Pictures	Central VA (near Richmond)	Juvenile	id519622	PXL_20230210_190414148.dng	TOP	578	1014	1014	1	1008
FieldData\Smithsonian Pictures\NOVA-DC-MD\Adult\141485	1	FieldData	Smithsonian Pictures	NOVA-DC-MD	Adult	id141485	PXL_20230131_195525225.dng	TOP	610	1015	1015	1	1009
FieldData\Smithsonian Pictures\Central VA (near Richmond)\Hatchling\519670	1	FieldData	Smithsonian Pictures	Central VA (near Richmond)	Hatchling	id519670	PXL_20230210_195935844.dng	TOP	545	1016	1016	0	0
FieldData\Smithsonian Pictures\Southern VA\Hatchlings\519665	1	FieldData	Smithsonian Pictures	Southern VA	Hatchlings	id519665	PXL_20230210_210647249.dng	TOP	1758	1017	1017	0	0
FieldData\Smithsonian Pictures\Southern VA\Hatchlings\519644	1	FieldData	Smithsonian Pictures	Southern VA	Hatchlings	id519644	PXL_20230210_200200959.dng	TOP	1616	1018	1018	0	0
FieldData\Smithsonian Pictures\NOVA-DC-MD\Juvenile\141937	1	FieldData	Smithsonian Pictures	NOVA-DC-MD	Juvenile	id141937	PXL_20230131_201424046.dng	TOP	1065	1019	1019	1	1010
FieldData\Smithsonian Pictures\Central VA (near Richmond)\Hatchling\519671	1	FieldData	Smithsonian Pictures	Central VA (near Richmond)	Hatchling	id519671	PXL_20230210_211022931.dng	TOP	556	1020	1020	0	0
FieldData\Smithsonian Pictures\NOVA-DC-MD\Juvenile\38892	1	FieldData	Smithsonian Pictures	NOVA-DC-MD	Juvenile	id38892	PXL_20230214_182848686.dng	TOP	1226	1021	1021	0	0
FieldData\Smithsonian Pictures\Central VA (near Richmond)\Hatchling\22289	1	FieldData	Smithsonian Pictures	Central VA (near Richmond)	Hatchling	id22289	PXL_20230201_193501593.dng	TOP	491	1022	1022	0	0
FieldData\Smithsonian Pictures\NOVA-DC-MD\Juvenile\67773	1	FieldData	Smithsonian Pictures	NOVA-DC-MD	Juvenile	id67773	PXL_20230131_190141629.dng	TOP	1352	1023	1023	0	0
FieldData\Smithsonian Pictures\Southern VA\Adult\497301	1	FieldData	Smithsonian Pictures	Southern VA	Adult	id497301	PXL_20230208_201554809.dng	TOP	1495	1024	1024	1	1011
[truncated: 136 more rows]
