# Supplementary material for: New approaches for capturing and estimating variation in complex animal color patterns from digital photographs: application to the Eastern Box Turtle (Terrapene carolina)
Source: PeerJ. 2025 Jul 21;13:e19690. doi: 10.7717/peerj.19690 (PMC12288748; doi:10.7717/peerj.19690)
Supplement: Supplemental Information 3 — Dates found, location, measurements, observations. [file peerj-13-19690-s003.xlsx]

## Sheet: TurtData
Locatlity	Date	Sampling time	Time	GPS coordinates	Animal ID	sex	A/J/S	Blood ID	CL (mm)	CW (mm)	GPS Y/N	Image #	Habitat	Light (lux)	Temp (C)	Humidity	Weather	Who with	Notes
Clifton	2022-06-14		11:39:00	38.781679, -77.799588	58	m	a	na	115	99	n		Grassland/shrubland	84.5	27	70	overcast	Jordan Davis, Kathryn Long, Elizabeth Forbes, Erik Maki	Found on trail, moving between dense shrubs, missing anterior marginal scutes above head
Clifton	2022-06-14		13:30:00	38.784759, -77.800880	59	f	a	na	74	78	n		Grassland/Shrubland, Forest edge	62	27	67	overcast	Jordan Davis, Kathryn Long, Elizabeth Forbes, Erik Maki	Found with in the tall grass
Clifton	2022-06-14		13:47:00		60	f	a	na	106	54	n		Grassland/shrubland	53.7	27	67	overcast	Jordan Davis, Kathryn Long, Elizabeth Forbes, Erik Maki	Found at the edge of the forest near thick undgergrowth and was within tall grass
Clifton	2022-06-17		11:21:00	38.785458, -77.801553	16	m	a	na	135	104	n		Edge of Secondary forest, near this shrubs	239	32.4	71	clear/sunny	max	Forest edge near dense vegetation,
Clifton	2022-06-17		12:01:00	38.782763, -77.802755	67	f	a	6/17 va67f	na	na	n		Secondary Forest	348	32.2	80	clear/sunny	max	on trail moving between 2 dense areas of vegetation
Clifton	2022-06-17		12:53:00	38.782736, -77.799708	68	m	a	6/17_VA68M	125	94	n		Secondary Forest/brushpile	305	32.2	80	clear/sunny	max	No Annuli, In trail under a brush pile, Missing back right leg/left foot (predation)
Clifton	2022-06-24	9:13am to 3pm	10:37:00	38.783396, -77.791671	71	f	a	na	134	105	n	ID 71	wetland	1730	29	65	partly cloudy	max	would not open up need to try to find again to take blood sample
Clifton	2022-06-27	7am to 1pm	11:42:00	38.79283,-77.768284	77	f	a	na	117	91	n	ID77	edge	380	22.3	89	rainy	paige	unable to take photos because the shell had too much shine. Return for habitat photos and try to find turtle again for blood
Clifton	2022-06-29	8am to 2pm	09:53:00	38.777925. -77.794732	84	m	a	6/29 84	148	109	n	ID84	wetland/shrubland	230	30.4	58	sunny	paige	left 3 and 4 costal scutes are white (could just be shedding
Clifton	2022-06-30	7:45am to 2pm	13:18:00	38.782429, -77.800967	93	f	a	6/30 93	114	95	n	ID 93	early successional	4290	30	36	sunny	jordan	was found under thick bushes. Moved out to the open since it was not possible to take photos where it was found.
Clifton	2022-07-05	8am to 2pm	09:30:00	38.782733, -77.803223	91	m	a	7/5 91	142	106	n	ID 91	late successional forest/Dense shrubs	29	21.8	71.5	patly cloudy	Max, Jordan, Paige, Kathryn	Found under thick vegetation, Low light levels because individual was found under a thick canopy
Clifton	2022-07-05	8am to 2pm	10:09:00	38.783065, -77.805756	57	m	a	na	125	89	n	ID 57	late successional forest/gap	380	23.9	74.5	partly cloudy	Max, Jordan, Paige, Kathryn	Found under a fallen tree in a gap in the forest canopy. Recapture for the survey run by Clifton
Clifton	2022-07-05	8am to 2pm	12:00:00	38.786129, -77.800518	94	m	a	7/5 94	130	109	n	ID 94	LS Forest	10.8	24.2	77.2	overcast/rainy	Max, Jordan	Located under dense canopy with little vegetation growth on the forest floor. Low light levels because under a thicker canopy and a storm was forming
Mason Neck	2022-07-11	8am to 3pm	08:40:00	38.631130, -77.172952	1	f	a	na	136	105	n	7/11_1	Grassland/edge	979	21.4	68	sunny	Kathryn
Mason Neck	2022-07-11	8am to 3pm	10:00:00	38.631296, -77.173254	2	f	a	7/11 mn 2	130	101	n	7/11_2	Grassland/edge	4360	26.8	52	sunny	kathryn
Mason Neck	2022-07-11	8am to 3pm	11:30:00	38.629306, -77.172113	3	m	a	na	135	96	n	7/11_3	Late successional/ leaf litter	845	24.4	42.4	sunny	kathryn
Mason Neck	2022-07-11	8am to 3pm	11:55:00	38.629781, -77.174552	4	m	a	7/11 4	135	110	n	7/11_4	LS forest/ leaf litter	64	22.4	55	sunny	kathryn
Mason Neck	2022-07-12	8am to 2pm	11:26:00	38.628451, -77.172290	5	m	a	7/12 mn 5	125	103	n	7/12_4	LS forest/ leaf litter	61.4	26.5	67	sunny	Paige, Naomi
Mason Neck	2022-07-13	8am to 1pm	09:50:00	38.627298, -77.170941	6	m	a	7/13 mn 6	133	101	n	7/13_6	LS forest/short undergrowth	42.8	24.3	81.7	sunny	paige, Naomi
Mason Neck	2022-07-13	8am to 1pm	10:40:00	38.628228, -77.170646	7	m	a	7/13 mn 7	122	90	n	7/13_7	LS forest/ leaf litter	58	26.3	79	sunny	paige, Naomi
Mason Neck	2022-07-13	8am to 1pm	10:50:00	38.628228, -77.170646	8	m	a	7/13 mn 8	125	97	n	7/13_8	LS forest/ leaf litter	58	26.3	79	sunny	paige, Naomi
Mason Neck	2022-07-13	8am to 1pm	12:15:00	38.627088, -77.170444	9	f	a	7/13 mn 9	104	78	n	7/13_9	Grassland/edge	2920	33.5	57	sunny	paige, Naomi
Mason Neck	2022-07-20	8am to 12:17pm	09:25:00	38.631461, -77.169752	10	m	a	na	126	101	n	7/20_10	LS forest/litter	50.2	25.5	76.2	sunny	fws interns
Mason Neck	2022-07-20	8am to 12:17pm	09:59:00	38.631029, -77.169114	11	m	a	7/20 mn 11	134	103	n	7/20_11	LS forest/litter	110.2	26.5	72.6	sunny	fws interns
Mason Neck	2022-07-20	8am to 12:17pm	11:13:00	38.630560, -77.172145	12	f	a	11/20 mn 12	134	95	n	7/20_12	ES forest/low UG	80.3	28.7	67.5	sunny	fws interns
Mason Neck	2022-07-20	8am to 12:17pm	11:57:00	38.630632, -77.171882	13	m	a	7/20 mn 13	137	114	n	7/20_13	LS forest/ litter	66.4	28	62	sunny	fws interns
MN	2022-07-21	8am to 12pm	10:23:00	38.630243, -77.173641	21x	m	a	7/21 mn 21x	135	114	n	7/21_21x	LS/edge	990	30	71	sunny	jess, max, naomi	already marked
MN	2022-07-21	8am to 12pm	10:23:00	38.630243, -77.173641	15	f	a	7/21 mn 15	122	93	n	7/21_15	LS/edge	990	30	71	sunny	jess, max, naomi
MN	2022-07-21	8am to 12pm	11:46:00	38.633352, -77.174240	14	m	a	7/21 mn 16	124	95	n	7/21_14	LS/edge	95.8	28.7	56	sunny	jess, max, naomi
CI	2022-07-22	8am to 12pm	10:54:00	38.781110, -77.798464	107	f	a	na	106	87	n	7/22_107	Shrub land	109	26.4	66.4	sunny	kathryn	Found half burried under a bush.
MN	2022-07-25	8:41am to 12:41am	09:12:00	38.627396, -77.172682	440x	m	a	7/25 mn 440x	126	89	n	7/25_440x	LS/edge	96.5	26.9	73.6	sunny		previously marked
MN	2022-07-25	8:41am to 12:41am	09:43:00	38.625832, -77.176095	16	f	j	12/25 mn 16	90	74	n	7/25_16	LS/edge	78	27.5	74.4	sunny
MN	2022-07-27	8am to 12:00pm	11:30:00	38.629647, -77.173140	11x	m	a	11/27, MN, 11x	114	91	n	7/27_11x	LS/low Ug	150	28	72	sunny	Naomi	anterior marginal scutes missing looked recent, unable to mark in order (11x)
CI	2022-07-30	8:17am to 12:30pm	09:15:00	38.783085, -77.803650	108	f	a	7/30, CI, 108	132	92	n	7/30_108	LS/path	71	21.8	85	patly cloudy	David
MN	2022-08-02	8:04am to 1:00pm	10:48:00	38.626369, -77.169221	17	na	j	na	65	55	n	8/2_17	ES/Dense undergrowth/grassq	68	26	75	partly sunny	FWS interns, naomi, u18 FWS employees	Because of the size of the individual I did not feel comfortable drawing blood.

## Sheet: EnvDataInfo
Site	Date	Animal ID	Tracked/1st cap/recap	Coordinate	Pic ID	sampling time	time	season	Habitat	weather	temp	humidity	light	volunteers	notes
MN		1	c1	38.631130, -77.172952				early fall
MN		2	c1	38.631296, -77.173254				early fall
MN		3	c1	38.629306, -77.172113				early fall
MN		4	c1	38.629781, -77.174552				early fall
MN		5	c1	38.628451, -77.172290				early fall
MN		6	c1	38.627298, -77.170941				early fall
MN		7	c1	38.628228, -77.170646				early fall
MN		8	c1	38.628228, -77.170646				early fall
MN		9	c1	38.627088, -77.170444				early fall
MN		10	c1	38.631461, -77.169752				early fall
MN		11	c1	38.631029, -77.169114				early fall
MN		12	c1	38.630560, -77.172145				early fall
MN		13	c1	38.630632, -77.171882				early fall
MN		21x	c1	38.630243, -77.173641				early fall
MN		15	c1	38.630243, -77.173641				early fall
MN		14	c1	38.633352, -77.174240				early fall
MN		440x	c1	38.627396, -77.172682				early fall
MN		16	c1	38.625832, -77.176095				early fall
MN		11x	c1	38.629647, -77.173140				early fall
MN		17	c1	38.626369, -77.169221				early fall
CI		71	c1	38.783396, -77.791671				early fall
CI		77	c1	38.79283,-77.768284				early fall
CI		84	c1	38.777925. -77.794732				early fall
CI		93	c1	38.782429, -77.800967				early fall
CI		91	c1	38.782733, -77.803223				early fall
CI		57	c1	38.783065, -77.805756				early fall
CI		94	c1	38.786129, -77.800518				early fall
CI		107	c1	38.781110, -77.798464				early fall
CI		108	c1	38.783085, -77.803650				early fall
Cl		2	recap	38.782434, -77.801
Cl		2	RT	38.782468, -77.80093					Grassland/shrubland
Cl		2	recap	38.782568, -77.800884					ES forest/woodland
Cl		2	RT	38.782427, -77.800897					grassland/shrubland
Cl		2	RT	38.782518, -77.800974					ES forest/woodland
Cl		2	RT	38.782526, -77.800871					grassland/shrubland
Cl		2	RT	38.782357, -77.800818					wetland
Cl		2	RT	38.782508, -77.801101					es forest/woodland
Cl		2	RT	38.782545, -77.800804					es forest/woodland
Cl		2	RT	38.782474, -77.800965					es forest/woodland
Cl		2	RT	38.782503, -77.800845					grassland/shrubland
Cl		3	rc	38.782996, -77.800809					es forest/woodland
Cl		3	c1	38.782664, -77.80067					es forest/woodland
Cl		3	rt	38.783053, -77.800812					na
Cl		3	rt	38.78295, -77.800767					na
CI		5	c1	38.782827, -77.800596					grassland/shrubland
Cl		5	rt	38.782915, -77.800366					thicket
CI		5	rt	38.78273, -77.80041					grassland/shrubland
CI		5	rt	38.782847, -77.800439					grassland/shrubland: in tall vines and grasses
CI		5	rt	38.782389, -77.801236					es forest/woodland: on trail
CI		5	rt	38.782789, -77.800382					grassland/shrubland
CI		5	rt	38.782633, -77.800313					es forest/woodland: near creek
CI		5	rt	38.782766, -77.800803					grassland/shrubland
CI		5	rt	38.78315, -77.800003					es forest/ woodland: thicket, base of slope, edge of flood plain
CI		5	rt	38.782608, -77.800326					thicket near creek
CI		5	rt	38.782639, -77.80062					grassland/shrubland: thicket
CI		5	rt	38.783057, -77.800411					grassland/shrubland: tall grasses
CI		5	rt	38.782592, -77.80031					mature forest/woodland: thicket near flowing stream
CI		26	rt	38.777799, -77.793872					Grassland/shrubland: thicket, fallen trees
CI		26	rt	38.778129, -77.793639					grassland/shrubland
CI		26	rt	38.777519, -77.793679					mature forest/woodland:under fallen trees
CI		26	rt	38.77717, -77.794725					wetland:ephemeral swamp
CI		26	rt	38.777295, -77.793932					grassland/shrubland
CI		26	rt	38.777957, -77.793402					Wetland:thicket
CI		26	rt	38.777085, -77.794112					es forest/woodland
CI		26	rt	38.777253, -77.793839					mature forest/woodland: edge between grassland and forest
CI		26	rt	38.778095, -77.79372					grassland/shrubland: near berry thicket
CI		26	rt	38.778385, -77.792832					grassland/shrubland: thicket
CI		26	rt	38.777076, -77.794259					es froest/woodland
CI		26	rt	38.777821, -77.794051					thicket/brushpile
CI		26	rt	38.777125, -77.793836					grassland/shrubland
CI		26	rt	38.776967, -77.794961					wetland
CI		27	rt	38.782023, -77.791814					grassland/schubland: dense grasses meadow
CI		27	rt	38.782055, -77.791686					grassland/shrubland: tall grasses
CI		27	rt	38.782227, -77.791926					grassland/shrubland
CI		27	rt	38.782921, -77.793187					es forest/woodland: in tall grasses
CI		27	rt	38.783867, -77.800883					grassland/shrubland
CI		27	rt	38.78257, -77.801411					grassland/shrubland: on trail
CI		27	rt	38.782223, -77.792301					grassland: deep in tall grass
CI		27	rt	38.782815, -77.793268					grassland/shrubland: tall grasses
CI		27	rt	38.782008, -77.791639					grassland/shrubland: tall grasses
CI		27	rt	38.783259, -77.79743					grassland/shrubland: on trail
CI		27	rt	38.783241, -77.79279					grassland/shrubland
CI		27	rt	38.782951, -77.793322					grassland/shrubland: tall grasses
CI		27	rt	38.782807, -77.793415					mature forest/woodland: thorny thicket
CI		27	rt	38.783936, -77.800522					wetland: found on trial
CI		42	rt	38.78594, -77.80207					es forest/woodland
CI		42	rt	38.785302, -77.803138					thicket
CI		42	rt	38.785489, -77.802597					grassland/shrubland:tall grasses
CI		42	rt	38.785968, -77.801443					mature forest/woodland:
CI		42	rt	38.786296, -77.80141					mature forest/woodland: under fallen trees/brush
CI		42	rt	38.78651, -77.801058					es foreset/woodland:thichet
CI		42	rt	38.785108, -77.800771					es forest/woodland: thicket
CI		42	rt	38.786367, -77.801185					mature forest/woodland
CI		42	rt	38.785532, -77.80297					grassland/shrubland: thicket/brushpile
CI		42	rt	38.785047, -77.803533					grassland/shrubland: thiket
CI		42	rt	38.786785, -77.800749					mature forest/woodland
CI		42	rt	38.785337, -77.803152					grassland/shrubland: tall grasses

## Sheet: Summary
Site	total # Days	Successful Days	individuals	male	female	Juvenile/unsexed	success rate	recaptures	Photos/m	photos/f	Photos/j	Blood
CI	12	9	15	7	8	0	0.75	0	4	5	0	7
MN	12	8	20	13	6	1	0.73	0	13	6	1	16
