# Supplementary material for: New approaches for capturing and estimating variation in complex animal color patterns from digital photographs: application to the Eastern Box Turtle (Terrapene carolina)
Source: PeerJ journal article supplement (doi:10.7717/peerj.19690), 2025-07-21
Supplement: TurtleClassification_SurveyResults.zip [file Anonymized_Student_Data.xlsx]

## Sheet: Student01
2024 Number	Categories
	M-shaped	Single spotted	Striated	Blotchy	Spotted	Starburst	Speckled	Banded	Patchy
1001	0	0	0	1	0	0	0	0	1
1002	1	0	0	0	0	0	1	0	0
1003	0	1	0	0	0	0	1	0	0
1004	0	0	0	1	0	0	1	0	1
1005	0	0	0	1	0	1	0	1	1
1006	0	0	0	1	0	0	0	1	1
1007	0	0	0	1	0	0	0	0	1
1008	1	0	1	0	0	1	0	1	0
1009	1	0	1	0	0	1	0	1	0
1010	1	0	1	0	0	1	0	1	0
1011	0	0	0	1	0	1	1	0	1
1012	1	0	0	0	1	1	1	0	0
1013	0	1	1	0	0	0	0	0	0
1014	1	1	0	0	0	0	1	0	0
1015	1	0	0	0	1	1	0	0	0
1016	0	0	0	1	0	0	0	0	1
1017	1	0	1	0	1	1	0	0	0
1018	1	1	1	0	0	0	1	1	0
1019	0	0	0	1	0	0	0	0	1
1020	0	0	1	1	0	0	1	0	1
1021	0	0	0	1	0	0	1	0	1
1022	0	0	0	1	1	0	1	0	1
1023	0	0	0	1	0	0	1	0	1
1024	0	0	0	0	0	0	0	0	1
1025	0	0	0	1	1	0	1	0	1
1026	0	0	0	1	1	0	1	0	1
1027	0	0	0	1	1	0	1	0	1
1028	0	0	0	0	0	0	0	0	1
1029	0	1	0	0	0	0	0	0	0
1030	0	1	0	0	0	0	0	0	1
1031	1	0	0	1	1	0	1	0	0
1032	0	0	0	1	0	0	1	1	1
1033	1	0	1	0	0	1	0	0	0
1034	0	0	0	0	1	0	1	0	1
1035	0	0	0	1	0	0	0	0	1
1036	0	0	0	1	0	0	0	0	1
1037	0	0	0	1	0	0	0	1	1
1038	1	0	1	0	1	0	0	1	0
1039	0	1	1	0	0	0	1	1	0
1040	0	0	0	1	0	0	0	1	1
1041	0	1	0	1	0	0	0	0	1
1042	0	0	0	1	0	0	0	0	0
1043	0	0	0	1	0	1	0	0	1
1044	0	0	0	1	0	0	0	0	1
1045	1	0	0	1	0	0	1	1	0
1046	0	0	0	1	0	0	0	1	1
1047	0	0	0	1	1	1	1	0	0
1048	0	0	0	0	0	0	0	0	1
1049	0	0	0	1	0	1	1	0	1
1050	0	0	0	0	0	0	0	0	1
1051	0	0	0	1	0	0	1	0	0
1052	1	0	0	0	0	0	0	1	0
1053	0	0	0	1	1	0	1	0	1
1054	1	0	0	0	0	0	0	1	0
1055	0	0	0	1	1	0	1	0	0
1056	1	0	0	1	1	0	0	0	1
1057	0	0	0	1	0	0	0	0	1
1058	0	0	0	1	0	0	0	0	0
1059	0	0	0	1	1	0	1	0	0
1060	0	0	0	0	0	0	1	0	1
1061	0	0	1	1	0	0	1	0	1
1062	1	0	0	0	0	0	0	1	0
1063	0	0	0	0	1	0	0	0	0
1064	1	0	0	0	0	0	0	1	0
1065	1	0	0	1	1	0	1	0	0
1066	0	0	0	1	1	1	1	0	0
1067	1	0	0	0	0	1	0	1	0
1068	0	0	0	1	0	0	0	0	1
1069	0	0	0	1	0	1	1	0	1
1070	0	1	0	1	0	0	0	0	1
1071	0	1	0	1	0	0	0	0	1
1072	1	0	0	1	0	0	0	0	1
1073	1	0	0	1	0	1	0	0	1
1074	1	0	0	0	0	0	0	1	1
1075	1	0	0	0	0	1	0	1	0
1076	0	0	1	0	0	0	0	0	0
1077	0	0	1	0	0	0	0	0	0
1078	0	0	0	1	1	0	1	0	1
1079	0	0	1	0	0	1	0	1	0
1080	0	0	1	0	0	1	0	1	1
1081	0	0	0	1	1	0	1	0	1
1082	1	0	0	1	0	0	0	1	0
1083	0	0	0	0	1	0	1	0	0
1084	0	0	0	1	1	1	0	0	1
1085	1	0	0	1	0	0	1	0	1
1086	0	0	0	1	1	0	1	0	0
1087	0	1	0	1	0	0	0	0	0
1088	0	0	0	0	1	0	1	0	1
1089	0	0	0	0	0	1	0	0	1
1090	0	0	0	1	1	0	1	0	1
1091	0	0	0	1	1	0	0	0	1
1092	0	0	1	1	1	0	0	0	0
1093	0	1	0	1	0	0	0	0	1
1094	0	0	0	1	1	1	0	0	1
1095	0	0	0	1	1	0	1	0	1
1096	0	0	0	1	0	0	1	0	1
1097	1	0	0	1	1	0	1	0	0
1098	0	0	0	1	0	1	1	0	1

## Sheet: Student02
2024 Number	Categories
	M-shaped	Single spotted	Striated	Blotchy	Spotted	Starburst	Speckled	Banded	Patchy
1001	0	0	0	0	1	0	0	0	0
1002	1	0	0	0	0	0	0	0	0
1003	0	1	1	0	0	0	0	0	0
1004	0	0	0	0	1	0	0	0	0
1005	1	0	0	0	1	0	0	0	0
1006	1	0	0	0	0	0	0	1	0
1007	1	0	0	0	0	0	0	0	1
1008	1	0	0	0	0	0	0	0	0
1009	1	0	0	0	0	0	0	1	0
1010	1	1	0	0	0	0	0	0	0
1011	1	0	0	0	1	1	0	0	0
1012	1	0	0	0	1	0	0	1	0
1013	0	1	1	0	0	1	0	0	0
1014	1	1	0	0	0	1	0	0	0
1015	1	1	0	0	0	0	0	0	0
1016	0	0	0	1	1	0	1	0	1
1017	1	0	0	0	1	0	0	0	0
1018	1	1	0	0	0	0	0	0	0
1019	0	0	0	1	1	0	0	0	0
1020	0	0	0	1	0	0	0	0	1
1021	0	0	0	1	1	0	0	0	0
1022	0	0	0	1	0	1	0	0	1
1023	1	0	0	0	0	0	1	0	0
1024	1	0	1	0	0	0	0	0	0
1025	0	0	0	1	1	0	0	0	0
1026	0	0	0	1	0	0	0	0	1
1027	1	0	0	1	0	0	0	0	1
1028	0	0	1	0	0	1	0	0	0
1029	1	0	1	0	0	1	0	0	0
1030	1	0	1	0	0	0	0	0	0
1031	1	0	0	0	0	0	1	0	0
1032	0	0	0	1	0	0	1	0	0
1033	1	0	0	0	0	0	0	0	0
1034	0	0	0	1	0	0	1	0	0
1035	0	0	1	0	0	1	0	1	0
1036	1	0	0	0	0	0	0	1	0
1037	0	0	0	1	0	0	0	0	0
1038	1	0	0	0	0	1	0	0	0
1039	1	0	0	0	1	0	0	0	0
1040	0	0	0	1	0	0	0	0	0
1041	0	0	0	1	0	0	0	0	1
1042	1	0	0	1	0	0	0	0	0
1043	0	0	0	0	0	0	0	1	0
1044	0	0	1	0	0	1	0	0	0
1045	1	0	0	1	0	0	0	0	0
1046	1	0	1	0	0	0	0	0	0
1047	1	0	0	1	1	0	0	0	0
1048	0	0	1	0	0	1	0	0	0
1049	0	0	0	1	0	0	1	0	0
1050	0	0	1	0	0	0	0	0	0
1051	0	0	0	1	0	0	1	0	0
1052	1	0	0	0	0	0	0	0	0
1053	0	0	0	0	0	0	1	0	0
1054	1	0	0	0	0	0	0	0	0
1055	1	0	0	0	0	0	1	0	0
1056	1	0	0	1	0	0	1	0	0
1057	0	0	0	1	0	0	0	0	1
1058	0	0	1	0	0	0	0	0	0
1059	0	0	0	0	0	1	1	0	0
1060	0	0	0	0	0	0	1	0	0
1061	0	0	0	1	0	1	0	0	0
1062	1	0	0	0	0	1	0	0	0
1063	0	0	0	0	0	0	0	0	1
1064	1	0	1	0	0	0	0	0	0
1065	1	0	0	0	0	1	1	0	0
1066	1	0	1	0	0	1	0	0	0
1067	1	0	0	0	0	0	0	0	0
1068	0	0	1	0	0	0	0	1	0
1069	0	0	0	1	0	0	1	0	0
1070	0	1	0	0	0	0	0	0	0
1071	1	0	0	1	0	0	0	0	0
1072	1	0	0	1	0	0	0	0	0
1073	1	0	0	0	0	1	0	0	0
1074	1	0	0	0	1	0	0	0	0
1075	1	0	0	0	0	0	0	0	0
1076	0	0	1	0	0	0	1	0	0
1077	1	0	0	0	0	0	1	0	0
1078	0	0	0	0	0	0	1	0	0
1079	0	0	0	0	1	0	1	0	0
1080	0	0	0	0	1	1	0	0	0
1081	0	0	0	0	0	0	1	0	0
1082	1	0	0	0	0	0	0	0	0
1083	1	0	0	0	0	0	1	0	0
1084	1	0	0	0	0	0	1	0	0
1085	1	0	0	0	0	0	1	0	0
1086	0	0	1	1	0	0	0	0	0
1087	1	0	0	0	0	0	1	0	0
1088	0	0	1	0	0	0	1	0	0
1089	1	0	0	0	0	1	1	0	0
1090	0	0	0	0	1	0	1	0	0
1091	0	0	0	1	0	0	0	0	0
1092	0	0	0	1	0	0	1	0	0
1093	0	0	1	0	0	0	0	0	0
1094	0	0	0	1	1	0	0	0	0
1095	0	0	0	1	0	0	1	0	0
1096	1	0	1	0	0	1	0	0	0
1097	1	0	0	1	0	0	0	0	0
1098	0	0	0	0	0	0	1	0	0

## Sheet: Student03
2024 Number	Categories
	M-shaped	Single spotted	Striated	Blotchy	Spotted	Starburst	Speckled	Banded	Patchy
1001	0	0	0	1	1	0	1	0	0
1002	1	0	0	0	0	0	0	0	0
1003	0	1	0	1	1	0	1	0	0
1004	0	0	0	1	1	0	0	0	0
1005	1	0	0	1	1	0	1	0	1
1006	0	0	0	0	0	0	0	0	0
1007	0	0	0	1	1	1	0	0	0
1008	1	0	0	0	0	0	0	0	0
1009	1	0	0	1	0	0	0	0	0
1010	1	0	0	0	1	0	0	0	0
1011	0	0	0	1	0	0	0	0	1
1012	1	0	0	0	1	0	0	0	0
1013	0	1	1	0	1	0	0	1	0
1014	1	1	0	1	1	0	0	0	0
1015	1	0	0	1	0	0	0	0	0
1016	0	0	0	1	0	0	1	0	1
1017	1	0	0	0	0	0	0	0	0
1018	1	0	0	1	0	1	0	0	1
1019	0	0	0	1	0	0	0	0	1
1020	0	0	1	1	0	0	0	0	1
1021	0	0	0	0	1	0	1	0	1
1022	0	0	1	1	0	0	0	1	1
1023	0	0	0	1	0	0	0	0	1
1024	0	0	0	1	0	0	0	1	0
1025	0	0	0	0	1	0	1	0	0
1026	0	0	0	0	1	0	1	1	1
1027	0	0	0	1	0	0	0	0	1
1028	0	0	1	0	0	0	0	0	0
1029	0	0	0	1	1	0	0	0	0
1030	0	0	0	1	0	0	0	0	1
1031	1	0	0	1	1	0	0	0	1
1032	0	0	0	1	1	0	1	0	0
1033	1	0	0	0	1	0	0	0	1
1034	0	0	0	1	1	0	1	0	0
1035	0	0	1	1	0	0	0	0	1
1036	0	0	1	1	0	0	0	1	1
1037	0	0	1	1	0	0	0	1	0
1038	1	1	0	0	0	1	0	0	0
1039	1	1	0	1	0	1	0	0	0
1040	0	0	0	1	0	0	0	1	1
1041	0	1	0	1	0	0	0	1	0
1042	0	0	0	0	0	0	1	1	1
1043	0	0	0	1	0	0	0	1	0
1044	1	0	0	1	1	0	0	0	1
1045	1	0	0	1	0	0	0	0	1
1046	1	0	0	1	0	0	1	0	1
1047	1	0	0	0	1	1	1	0	0
1048	0	1	0	1	0	0	0	1	0
1049	1	0	0	1	1	1	0	0	0
1050	0	0	0	1	0	0	0	1	1
1051	0	0	0	0	1	0	1	0	0
1052	1	0	0	0	0	0	0	0	0
1053	0	0	0	0	1	1	1	0	0
1054	1	0	0	1	0	0	0	0	0
1055	0	0	0	0	1	1	1	0	0
1056	1	0	0	1	1	0	0	0	1
1057	0	0	0	1	0	0	0	0	0
1058	0	1	1	0	0	0	0	0	1
1059	0	0	0	1	1	1	1	0	0
1060	0	0	0	0	1	0	0	0	0
1061	0	0	0	1	1	1	0	0	0
1062	1	0	0	1	0	1	0	0	0
1063	0	0	0	1	0	0	0	0	1
1064	1	0	0	1	0	0	0	1	1
1065	1	0	0	1	1	1	0	0	0
1066	1	0	0	0	1	0	0	1	1
1067	1	0	0	1	0	0	0	0	0
1068	1	1	0	1	0	0	0	0	0
1069	0	0	0	1	1	0	0	1	0
1070	0	1	0	0	0	0	0	1	0
1071	1	1	0	1	0	0	0	0	0
1072	1	0	0	1	0	0	0	1	1
1073	1	0	0	1	0	0	0	1	0
1074	1	0	0	1	1	0	0	0	0
1075	1	1	0	0	0	1	0	1	0
1076	0	0	0	1	0	0	0	1	0
1077	0	0	0	0	1	0	0	1	0
1078	0	0	0	1	1	0	0	0	0
1079	0	0	0	0	1	0	1	0	0
1080	0	0	0	1	0	1	0	0	1
1081	0	0	0	0	1	0	1	1	0
1082	1	0	0	1	1	0	0	1	0
1083	0	1	0	1	0	1	0	0	0
1084	1	0	0	1	0	0	0	1	1
1085	1	1	0	0	0	1	1	0	0
1086	0	0	1	1	1	0	0	0	0
1087	0	0	0	1	1	0	0	0	0
1088	0	0	0	0	1	1	1	0	0
1089	0	0	0	1	0	0	0	1	0
1090	0	0	0	0	1	1	1	0	0
1091	0	0	0	1	0	0	0	1	1
1092	1	0	0	1	1	0	0	1	0
1093	0	0	0	1	0	0	0	1	0
1094	0	0	0	0	1	1	0	0	0
1095	0	0	0	1	1	0	0	0	1
1096	0	0	0	0	1	0	0	1	1
1097	1	0	0	1	0	0	0	0	1
1098	0	0	0	1	1	0	0	1	0

## Sheet: Student04
2024 Number	Categories
	M-shaped	Single spotted	Striated	Blotchy	Spotted	Starburst	Speckled	Banded	Patchy
1001	0	0	1	1	0	0	0	0	1
1002	1	0	1	1	0	0	0	0	1
1003	1	1	1	0	0	0	0	1	0
1004	1	0	1	0	1	0	1	0	0
1005	1	0	1	1	0	0	0	0	1
1006	0	0	1	1	0	0	0	0	0
1007	0	0	1	1	0	0	0	0	1
1008	1	0	1	0	0	0	0	0	0
1009	1	0	1	0	0	0	0	0	1
1010	1	1	1	0	0	0	0	0	0
1011	1	0	1	0	0	1	0	0	1
1012	1	0	1	0	1	0	0	0	0
1013	0	1	1	0	0	1	0	1	0
1014	1	1	1	0	0	1	0	0	0
1015	1	0	1	0	0	0	0	1	1
1016	0	0	1	1	0	0	0	0	1
1017	1	0	1	0	0	0	0	0	1
1018	1	0	1	0	0	0	0	0	1
1019	0	0	0	1	0	0	0	0	1
1020	0	0	1	1	0	0	0	0	1
1021	0	0	1	1	1	0	0	0	1
1022	1	0	0	1	0	0	0	0	1
1023	0	0	1	1	0	0	0	0	1
1024	1	0	1	0	0	0	0	0	1
1025	0	0	1	1	1	0	0	0	1
1026	0	0	1	1	0	0	0	0	1
1027	1	0	0	1	0	0	0	0	1
1028	0	0	1	0	0	0	0	1	1
1029	0	1	1	0	0	0	1	0	1
1030	0	0	1	1	0	0	0	0	1
1031	1	0	1	1	0	0	0	0	1
1032	0	0	1	1	0	0	0	0	1
1033	1	0	1	1	0	0	0	0	1
1034	1	0	1	0	1	0	0	0	1
1035	0	0	1	1	0	0	0	0	1
1036	1	0	1	1	0	0	0	0	1
1037	1	0	1	0	0	1	0	0	1
1038	1	0	1	0	0	0	0	0	0
1039	1	0	1	0	0	0	0	0	1
1040	0	0	1	1	0	0	0	0	1
1041	1	1	1	0	0	0	0	0	1
1042	0	0	1	1	0	0	0	1	1
1043	0	0	1	1	0	0	0	0	1
1044	1	0	1	0	0	1	0	1	0
1045	1	0	1	0	0	0	0	0	1
1046	1	0	1	1	0	0	0	0	1
1047	1	0	1	1	0	0	0	0	1
1048	0	0	1	0	0	1	0	1	0
1049	0	0	0	1	0	0	0	0	1
1050	0	0	1	1	0	0	0	0	1
1051	0	0	1	0	1	0	1	0	1
1052	1	0	1	0	0	0	0	0	0
1053	0	0	1	1	1	0	0	0	1
1054	1	0	1	0	0	0	0	1	0
1055	0	0	1	1	0	0	0	0	1
1056	1	0	1	1	0	0	0	0	1
1057	0	0	1	1	0	0	0	0	1
1058	0	0	1	0	0	1	0	1	0
1059	0	0	1	1	0	0	0	0	1
1060	0	0	1	1	0	0	0	0	1
1061	0	0	1	1	0	0	0	0	1
1062	1	0	1	0	0	0	0	0	1
1063	0	0	0	1	0	0	1	0	1
1064	1	0	1	0	0	0	0	0	1
1065	1	0	1	1	0	0	0	0	1
1066	1	0	1	0	0	0	0	1	1
1067	1	0	1	0	0	0	0	0	0
1068	1	1	1	0	0	0	0	1	0
1069	0	0	0	1	0	0	1	0	1
1070	0	1	1	0	0	0	0	0	1
1071	1	0	1	0	0	0	0	1	1
1072	1	0	1	1	0	0	0	0	1
1073	1	0	1	0	0	1	0	1	0
1074	1	0	0	1	0	0	0	0	1
1075	1	0	1	0	0	1	0	0	0
1076	0	0	1	1	0	0	1	0	1
1077	1	0	1	0	0	0	0	0	1
1078	0	0	1	1	1	0	0	0	1
1079	0	0	1	1	0	0	0	0	1
1080	0	0	0	1	0	0	0	0	1
1081	0	0	1	1	1	0	1	0	0
1082	1	0	1	0	0	0	0	0	1
1083	1	0	0	1	0	0	0	0	1
1084	1	0	1	0	0	0	1	0	1
1085	1	0	1	0	1	0	0	0	1
1086	1	0	1	0	0	0	0	1	1
1087	1	1	1	0	0	0	0	0	1
1088	0	0	0	1	1	0	1	0	1
1089	1	0	1	0	0	0	0	0	1
1090	0	0	0	1	1	0	1	0	1
1091	0	0	1	1	0	0	0	0	1
1092	1	0	1	0	0	0	0	0	1
1093	0	1	1	0	0	0	0	0	0
1094	0	0	0	1	0	0	0	0	1
1095	0	0	0	1	1	0	1	0	1
1096	1	0	1	0	0	1	0	0	1
1097	1	0	1	0	0	0	0	0	1
1098	0	0	1	1	0	0	1	0	1

## Sheet: Student05
2024 Number	Categories
	M-shaped	Single spotted	Striated	Blotchy	Spotted	Starburst	Speckled	Banded	Patchy
1001	0	0	1	0	1	0	0	0	0
1002	1	0	0	0	0	0	0	0	1
1003	1	1	0	0	0	0	0	0	0
1004	0	0	1	0	1	0	1	0	0
1005	0	0	0	0	0	0	1	1	1
1006	0	0	0	0	0	0	1	1	0
1007	1	0	1	0	0	0	0	0	0
1008	1	0	0	0	0	0	0	0	0
1009	0	0	0	1	0	0	0	0	1
1010	1	0	0	0	0	0	0	0	0
1011	0	0	0	1	0	0	1	0	1
1012	1	0	1	0	1	0	1	0	0
1013	1	1	0	0	0	0	0	0	0
1014	1	0	0	0	0	0	0	0	0
1015	1	0	0	0	0	0	0	0	1
1016	0	0	0	0	1	0	1	0	0
1017	1	0	0	0	1	0	0	0	0
1018	1	0	0	0	0	0	0	0	1
1019	0	0	0	0	0	0	0	0	1
1020	1	0	0	0	1	0	0	0	0
1021	0	0	0	0	1	0	1	0	0
1022	0	0	0	0	1	0	0	0	1
1023	0	0	0	0	1	0	0	0	1
1024	1	0	1	0	0	0	0	0	0
1025	0	0	0	0	1	0	1	0	0
1026	0	0	0	1	1	0	0	0	1
1027	0	0	0	0	0	0	0	0	1
1028	0	0	1	0	0	0	0	0	1
1029	0	1	0	0	0	0	0	0	1
1030	0	0	1	1	0	1	0	0	0
1031	1	0	0	0	1	0	0	0	1
1032	0	0	0	0	0	0	0	0	1
1033	0	0	0	0	0	0	0	0	1
1034	0	0	0	0	1	0	1	0	0
1035	1	0	0	1	0	0	0	0	0
1036	0	0	0	1	0	0	0	0	1
1037	1	0	0	0	0	0	0	0	0
1038	1	0	0	0	0	0	0	0	0
1039	1	0	0	0	1	0	0	0	0
1040	0	0	0	1	0	0	0	0	1
1041	1	1	0	0	0	0	0	0	0
1042	0	0	1	0	1	0	0	0	0
1043	0	0	0	1	0	0	0	0	0
1044	1	0	0	0	0	0	0	0	1
1045	1	0	0	1	0	0	0	0	0
1046	1	0	1	0	1	0	0	0	0
1047	1	0	0	0	0	0	0	0	1
1048	0	0	1	0	0	0	0	0	0
1049	0	0	0	0	0	0	0	0	1
1050	1	0	0	0	0	0	0	0	0
1051	0	0	0	0	1	0	0	0	0
1052	1	0	0	0	0	0	0	0	0
1053	0	0	0	0	1	0	0	0	0
1054	1	0	0	0	0	0	0	0	0
1055	0	0	0	0	1	0	0	0	1
1056	1	0	0	0	1	0	0	0	0
1057	0	0	0	1	0	0	0	0	0
1058	0	0	1	0	0	0	0	0	0
1059	0	0	1	0	1	0	0	0	0
1060	0	0	0	1	1	0	0	0	0
1061	0	0	0	1	0	0	0	0	0
1062	1	0	0	0	0	0	0	0	0
1063	0	0	0	0	0	0	0	0	1
1064	1	0	0	0	0	0	0	0	0
1065	1	0	0	0	1	0	0	0	0
1066	0	0	0	0	0	0	0	0	1
1067	1	0	0	0	0	0	0	0	0
1068	1	0	0	0	0	0	0	0	0
1069	0	0	0	0	0	0	1	0	1
1070	0	1	0	0	0	0	0	0	0
1071	1	1	0	0	0	0	0	0	0
1072	1	0	0	0	0	0	0	0	1
1073	1	0	0	0	0	0	0	0	0
1074	1	0	0	0	0	0	0	0	1
1075	1	0	0	0	0	0	0	0	0
1076	0	0	0	0	1	0	1	0	0
1077	1	0	0	0	0	0	0	0	0
1078	0	0	1	0	1	0	1	0	0
1079	0	0	0	0	0	0	0	1	1
1080	0	0	1	0	0	0	0	0	1
1081	0	0	0	0	1	0	1	0	0
1082	1	0	0	0	0	0	0	0	0
1083	1	1	0	0	1	0	0	0	0
1084	1	0	0	0	0	0	0	0	1
1085	1	0	0	0	1	0	0	0	0
1086	1	0	0	0	0	0	0	0	1
1087	1	1	0	0	0	0	0	0	0
1088	0	0	0	0	1	0	1	0	1
1089	0	0	1	0	0	0	0	0	1
1090	0	0	0	0	1	0	1	1	0
1091	0	0	0	1	0	0	0	0	1
1092	1	0	1	0	1	1	0	0	0
1093	1	0	1	0	0	1	0	0	0
1094	1	0	0	1	0	0	0	1	0
1095	0	0	0	1	1	0	1	0	1
1096	0	0	1	0	0	1	0	0	0
1097	1	0	0	1	1	0	0	0	0
1098	0	0	0	1	1	0	1	0	0

## Sheet: Student06
2024 Number	Categories
	M-shaped	Single spotted	Striated	Blotchy	Spotted	Starburst	Speckled	Banded	Patchy
1001	0	0	0	0	0	0	1	0	1
1002	0	0	0	0	0	0	0	0	1
1003	0	1	1	0	0	1	0	0	0
1004	0	0	0	0	1	0	1	0	0
1005	0	0	0	1	0	0	0	0	0
1006	0	0	0	1	0	0	0	0	0
1007	0	0	0	1	0	1	0	0	1
1008	1	0	0	0	0	0	0	0	0
1009	0	0	0	1	0	0	0	0	0
1010	0	1	0	0	0	0	0	1	0
1011	0	0	0	0	0	1	0	0	0
1012	0	0	0	1	0	0	0	1	1
1013	0	1	1	0	0	1	0	0	0
1014	0	0	1	0	0	1	0	0	0
1015	0	0	0	1	0	1	0	0	1
1016	0	0	0	0	0	0	0	0	1
1017	1	0	0	0	0	0	0	0	0
1018	0	0	0	0	0	0	0	0	1
1019	0	0	0	0	0	0	0	1	1
1020	0	0	1	0	0	0	0	0	0
1021	0	0	0	0	0	0	0	0	1
1022	0	0	0	1	0	0	0	0	1
1023	0	0	0	0	0	1	0	0	0
1024	0	0	0	1	0	0	0	0	0
1025	0	0	0	1	0	0	0	0	1
1026	0	0	0	0	0	0	1	0	0
1027	0	0	0	0	0	0	0	0	1
1028	0	0	1	0	0	0	0	0	0
1029	0	0	0	1	0	0	1	0	0
1030	0	0	0	0	0	0	0	0	1
1031	0	0	0	0	0	0	0	1	0
1032	0	0	0	1	0	0	0	0	0
1033	0	0	0	0	0	0	0	1	0
1034	0	0	0	0	1	0	0	0	0
1035	0	0	0	0	0	0	1	0	0
1036	0	0	0	0	0	0	0	0	1
1037	0	0	0	0	0	0	1	0	0
1038	0	0	0	1	0	1	0	0	0
1039	0	0	0	1	0	0	0	1	0
1040	0	0	0	0	0	0	0	0	1
1041	0	0	0	0	0	0	1	0	0
1042	0	0	0	1	0	0	0	0	1
1043	0	0	0	1	0	1	0	0	0
1044	0	0	1	0	0	0	0	0	0
1045	1	0	0	0	0	0	0	0	0
1046	0	0	0	0	0	0	0	1	0
1047	0	0	0	1	0	0	1	0	0
1048	0	0	1	0	0	0	0	0	0
1049	0	0	0	0	0	0	1	1	0
1050	0	0	0	1	0	0	0	0	0
1051	0	0	0	0	1	0	1	0	0
1052	0	0	0	0	0	1	1	0	0
1053	0	0	0	0	0	0	1	0	0
1054	0	0	0	0	0	0	0	0	1
1055	0	0	0	1	0	0	0	0	0
1056	0	0	0	1	0	0	0	0	0
1057	0	0	0	0	0	0	0	1	0
1058	0	0	1	0	0	0	0	0	0
1059	0	0	0	1	0	0	1	0	0
1060	0	0	0	0	0	0	1	0	0
1061	0	0	0	0	0	1	0	0	0
1062	0	0	0	0	0	0	0	1	0
1063	0	0	0	0	0	0	1	0	0
1064	0	0	0	0	0	0	0	0	1
1065	0	0	0	0	0	1	1	0	0
1066	0	0	0	0	0	1	1	0	0
1067	1	0	0	0	0	0	0	0	0
1068	0	0	0	0	0	1	1	0	1
1069	0	0	0	0	0	0	0	0	1
1070	0	1	0	0	0	0	0	0	0
1071	0	0	0	1	0	0	0	0	1
1072	0	0	0	1	0	0	1	0	0
1073	1	0	0	0	0	0	0	0	1
1074	0	0	0	0	0	0	0	1	0
1075	0	0	0	1	0	1	0	0	0
1076	0	0	1	1	0	0	0	0	0
1077	0	0	0	1	0	0	1	0	0
1078	0	0	0	0	0	0	1	0	0
1079	0	0	0	0	0	0	0	1	0
1080	0	0	0	0	0	1	0	0	0
1081	0	0	0	0	1	0	0	0	0
1082	0	0	0	1	0	0	0	0	0
1083	0	0	0	0	0	1	0	1	0
1084	0	0	0	0	0	0	0	0	1
1085	0	0	0	0	0	0	1	0	0
1086	0	0	0	1	0	0	1	0	0
1087	0	0	0	0	0	0	1	0	0
1088	0	0	0	0	0	0	1	0	0
1089	0	0	0	1	0	0	0	0	0
1090	0	0	0	1	0	0	1	0	0
1091	0	0	0	0	0	0	0	0	1
1092	0	0	0	1	0	0	0	0	0
1093	0	0	1	0	0	0	0	0	0
1094	0	0	0	0	0	0	0	1	0
1095	0	0	0	0	0	0	1	0	0
1096	0	0	0	0	0	1	1	1	0
1097	0	0	0	0	0	0	0	0	1
1098	0	0	0	0	0	0	0	0	1

## Sheet: Student07
2024 Number	Categories
	M-shaped	Single spotted	Striated	Blotchy	Spotted	Starburst	Speckled	Banded	Patchy
1001	1	0	0	1	0	0	1	0	1
1002	0	0	1	1	0	1	0	0	1
1003	1	0	1	0	0	0	1	1	1
1004	0	0	1	1	0	1	0	0	1
1005	0	0	1	1	1	1	0	0	0
1006	0	0	0	1	0	0	1	1	1
1007	0	0	0	1	0	0	1	1	1
1008	1	0	0	0	0	0	1	1	1
1009	1	0	0	1	1	0	0	1	0
1010	1	0	1	0	0	0	0	1	1
1011	0	0	1	1	0	1	0	0	1
1012	1	0	0	0	0	1	0	1	1
1013	0	0	1	1	1	0	1	0	0
1014	1	0	1	1	0	0	0	0	1
1015	1	0	1	1	0	0	0	1	0
1016	0	0	0	1	0	0	1	1	1
1017	1	0	1	0	0	1	0	0	1
1018	1	0	0	0	0	1	0	1	1
1019	0	0	0	1	0	0	1	1	1
1020	0	0	0	0	0	1	1	1	1
1021	0	0	1	1	0	1	0	0	1
1022	1	0	1	0	0	1	0	1	1
1023	0	0	0	1	0	0	1	1	1
1024	0	0	1	1	0	0	1	1	0
1025	0	0	0	0	0	1	1	1	1
1026	0	0	1	1	0	0	0	1	1
1027	0	0	0	1	0	0	1	1	1
1028	0	0	1	1	0	0	0	1	1
1029	0	1	1	0	0	1	0	0	1
1030	1	0	1	1	0	0	0	1	0
1031	1	0	0	1	0	1	0	1	0
1032	0	0	0	1	0	0	1	1	1
1033	1	0	0	0	0	1	0	1	1
1034	0	0	1	1	0	1	0	1	1
1035	0	0	1	0	0	0	1	1	1
1036	0	0	0	1	0	0	1	1	1
1037	1	0	1	0	0	0	0	1	1
1038	1	0	1	0	0	1	0	1	0
1039	0	0	0	1	0	1	0	1	1
1040	0	0	1	1	0	0	0	1	1
1041	0	0	1	1	0	0	0	1	1
1042	1	0	0	1	0	1	0	1	0
1043	0	0	1	1	0	0	0	1	1
1044	0	0	1	1	0	1	0	1	0
1045	1	0	0	0	0	1	0	1	1
1046	0	0	1	1	0	1	0	1	0
1047	0	0	0	0	0	1	1	1	1
1048	0	0	0	1	0	0	1	1	1
1049	1	0	0	0	0	1	0	1	1
1050	0	0	1	1	0	0	0	1	1
1051	0	0	1	1	0	1	0	1	0
1052	1	0	1	0	0	1	0	1	0
1053	0	0	0	1	0	1	0	1	1
1054	1	0	1	1	0	0	0	1	0
1055	0	0	1	1	0	1	0	1	0
1056	0	0	0	1	0	1	0	1	1
1057	0	0	0	1	0	0	1	1	1
1058	0	1	0	0	0	0	1	1	1
1059	0	0	0	0	0	1	1	1	1
1060	0	0	0	1	0	0	1	1	1
1061	0	0	0	1	0	1	1	1	0
1062	1	0	0	1	0	0	0	1	1
1063	0	0	0	1	0	0	1	1	1
1064	1	0	0	1	0	0	0	1	1
1065	0	0	0	1	0	1	0	1	1
1066	0	0	1	0	0	1	0	1	1
1067	1	0	1	0	0	0	0	1	1
1068	0	0	0	1	0	1	1	1	0
1069	0	0	1	1	0	0	0	1	1
1070	0	1	1	1	0	0	0	1	0
1071	0	0	0	1	0	1	0	1	1
1072	0	1	0	1	0	0	0	1	1
1073	1	0	1	0	0	0	0	1	1
1074	1	0	1	1	0	0	0	1	0
1075	1	0	1	1	0	0	0	1	0
1076	0	0	0	1	0	1	1	1	0
1077	0	0	0	1	0	0	1	1	1
1078	0	1	0	1	0	1	0	1	0
1079	0	0	1	1	0	0	0	1	1
1080	0	0	0	1	0	1	0	1	1
1081	0	0	1	0	0	1	0	1	1
1082	1	0	0	1	0	0	0	1	1
1083	1	0	0	1	0	1	1	1	0
1084	0	0	0	1	1	0	0	1	1
1085	1	0	0	0	0	1	0	1	1
1086	0	0	1	1	0	0	0	1	1
1087	1	1	0	1	0	0	0	1	0
1088	0	0	0	1	1	0	0	1	1
1089	0	0	1	1	0	0	1	1	0
1090	0	0	0	1	1	1	0	1	0
1091	0	0	1	1	0	0	1	1	0
1092	1	0	1	1	0	0	0	1	0
1093	0	0	1	1	0	0	1	0	1
1094	0	0	1	0	0	1	0	1	1
1095	0	0	0	1	0	0	1	1	1
1096	0	0	1	1	0	1	0	1	0
1097	1	0	0	1	0	0	1	1	0
1098	0	0	1	0	0	0	1	1	1

## Sheet: Student08
2024 Number	Categories
	M-shaped	Single spotted	Striated	Blotchy	Spotted	Starburst	Speckled	Banded	Patchy
1001	0	0	1	1	0	0	0	0	1
1002	1	0	0	1	0	0	0	0	1
1003	0	1	1	0	0	0	0	1	0
1004	0	0	1	0	1	1	0	1	0
1005	1	0	0	0	1	0	1	0	1
1006	0	0	0	1	1	0	1	0	1
1007	0	0	1	1	1	0	1	0	0
1008	1	0	0	0	0	0	0	0	0
1009	1	0	1	0	0	0	0	0	1
1010	1	1	1	0	0	0	0	0	0
1011	0	0	1	1	0	0	1	0	1
1012	0	0	1	0	1	0	1	1	0
1013	0	1	1	0	0	0	0	1	0
1014	0	1	1	0	0	1	0	1	0
1015	1	0	0	1	0	0	0	1	0
1016	1	0	0	1	0	0	1	0	1
1017	1	0	0	0	0	0	0	1	1
1018	1	0	0	0	0	0	0	1	1
1019	0	0	1	1	0	0	0	0	0
1020	0	0	0	1	0	0	0	1	0
1021	1	0	0	1	0	0	1	1	0
1022	1	0	0	1	1	0	0	1	0
1023	0	0	1	1	0	0	1	0	0
1024	0	1	0	1	0	0	0	0	1
1025	0	0	1	0	1	1	0	0	0
1026	0	0	1	1	1	0	0	0	1
1027	0	0	0	1	0	0	0	1	0
1028	0	0	1	0	0	0	0	0	1
1029	0	0	0	0	1	0	0	0	1
1030	0	0	0	1	0	0	0	1	0
1031	1	0	1	1	0	0	0	0	0
1032	0	0	1	1	0	0	0	0	0
1033	1	0	1	0	0	0	0	0	1
1034	0	0	1	0	1	0	1	0	0
1035	0	0	0	1	0	0	0	1	0
1036	0	0	1	0	0	0	0	0	1
1037	0	0	0	1	0	0	0	1	1
1038	1	1	0	1	0	0	0	1	1
1039	1	0	0	1	1	0	1	0	0
1040	0	0	0	1	0	0	0	1	1
1041	0	1	0	1	0	0	0	1	0
1042	0	0	0	0	0	1	0	1	1
1043	0	0	1	0	0	0	0	0	1
1044	0	0	0	1	0	0	0	1	0
1045	1	0	1	0	0	0	0	0	0
1046	1	0	0	1	0	0	0	1	0
1047	0	0	0	1	0	1	0	1	0
1048	0	1	0	1	0	0	0	0	1
1049	0	0	1	1	0	0	0	0	0
1050	0	0	0	1	0	0	0	1	0
1051	0	0	1	0	1	1	1	0	0
1052	1	1	0	0	0	0	0	1	1
1053	0	0	1	0	1	1	0	0	0
1054	1	0	0	1	0	0	0	1	0
1055	0	0	0	0	1	0	0	1	1
1056	1	0	1	1	1	0	0	0	0
1057	0	0	1	0	0	0	0	0	1
1058	0	0	1	1	0	0	0	0	0
1059	0	0	1	0	0	1	0	0	1
1060	0	0	1	0	0	0	1	0	1
1061	0	0	1	1	0	1	0	0	0
1062	1	0	0	1	0	0	0	1	0
1063	0	0	0	0	0	0	1	0	0
1064	1	0	0	1	0	0	0	1	0
1065	1	0	0	1	0	1	0	0	1
1066	1	0	0	1	0	0	1	0	1
1067	1	0	0	1	0	0	0	1	1
1068	1	0	1	1	0	0	0	0	0
1069	0	0	1	1	0	0	1	0	1
1070	0	1	1	0	0	0	0	0	0
1071	0	1	0	1	0	0	0	1	0
1072	1	0	0	1	0	0	0	1	0
1073	1	0	0	1	0	0	0	1	1
1074	1	0	1	1	0	0	0	0	1
1075	1	0	0	1	0	0	1	0	0
1076	1	0	1	1	0	0	0	0	0
1077	1	0	1	1	0	0	0	0	0
1078	0	0	1	0	0	1	1	0	1
1079	0	0	0	1	0	0	0	1	1
1080	0	0	1	0	0	1	0	0	1
1081	0	0	1	0	1	0	0	0	0
1082	1	0	1	1	0	0	0	0	0
1083	0	0	0	1	0	1	0	0	1
1084	1	0	1	0	0	0	1	0	1
1085	0	0	1	0	1	1	0	1	0
1086	1	0	1	0	0	0	0	0	1
1087	0	1	0	1	0	0	0	1	0
1088	0	0	1	1	1	0	0	0	0
1089	1	0	1	1	0	0	0	0	1
1090	0	0	1	0	1	0	0	0	1
1091	0	0	0	1	0	0	0	1	1
1092	1	0	1	0	0	0	1	1	0
1093	0	1	1	0	0	0	0	0	0
1094	0	0	1	0	0	1	1	0	1
1095	0	0	0	1	1	0	0	0	0
1096	1	0	1	1	0	1	0	0	0
1097	1	0	1	1	0	0	1	0	0
1098	0	0	1	1	0	0	1	0	1

## Sheet: Student09
2024 Number	Categories
	M-shaped	Single spotted	Striated	Blotchy	Spotted	Starburst	Speckled	Banded	Patchy
1001	0	0	0	1	1	0	0	0	1
1002	1	0	0	0	0	0	0	1	1
1003	1	1	0	0	0	0	0	0	0
1004	0	0	0	0	1	0	0	0	0
1005	1	0	0	1	0	0	0	1	0
1006	1	0	1	0	0	0	0	1	0
1007	0	0	0	1	0	1	0	1	0
1008	1	0	0	0	0	0	0	1	0
1009	1	0	0	0	0	0	0	1	0
1010	1	1	0	0	0	0	0	0	0
1011	1	0	0	0	0	0	0	1	0
1012	1	0	0	1	1	0	0	1	0
1013	0	1	0	0	0	0	0	0	0
1014	1	1	0	0	0	0	0	1	0
1015	1	0	0	0	0	0	0	0	0
1016	0	0	0	1	1	0	0	0	0
1017	1	0	0	0	0	0	0	0	0
1018	1	0	0	1	0	0	0	0	0
1019	0	0	1	1	0	0	0	1	1
1020	0	0	0	1	0	0	0	1	0
1021	0	0	0	1	1	0	1	0	0
1022	0	0	0	1	0	0	0	1	1
1023	0	0	1	1	0	0	0	1	1
1024	1	0	0	0	0	0	0	1	0
1025	0	0	0	0	1	0	1	0	0
1026	0	0	0	0	0	0	1	1	0
1027	0	0	0	1	1	0	0	1	0
1028	1	0	0	0	0	0	0	1	0
1029	0	1	0	0	0	0	0	0	0
1030	1	0	0	0	0	0	0	1	0
1031	1	0	0	1	0	0	0	0	0
1032	0	0	0	1	0	0	0	1	0
1033	1	0	0	1	0	0	0	1	0
1034	0	0	0	0	1	0	1	0	0
1035	1	0	0	1	0	0	0	0	0
1036	1	0	0	1	0	0	0	1	0
1037	1	0	0	0	0	0	0	0	0
1038	1	1	0	0	0	0	0	1	0
1039	1	0	0	0	0	0	1	0	0
1040	0	0	0	1	0	0	0	1	1
1041	1	1	0	0	0	0	0	0	0
1042	0	0	1	0	1	0	1	0	0
1043	0	0	0	0	0	0	0	0	1
1044	0	0	0	0	0	0	0	0	1
1045	1	0	0	0	0	0	0	1	0
1046	1	0	0	1	0	0	0	0	0
1047	1	0	0	0	1	0	0	1	0
1048	0	1	0	0	0	0	0	0	0
1049	1	0	1	0	0	0	0	1	0
1050	0	1	0	0	0	0	0	0	0
1051	0	0	0	0	1	0	1	0	0
1052	1	0	0	0	0	0	0	1	0
1053	0	0	0	0	1	0	1	0	0
1054	1	0	0	0	0	0	0	1	0
1055	0	0	0	0	1	0	0	0	0
1056	1	0	0	0	0	0	0	1	0
1057	0	0	0	1	0	0	0	0	1
1058	0	1	0	0	0	0	0	0	0
1059	0	0	0	0	0	1	0	1	0
1060	0	0	0	0	1	0	1	0	0
1061	0	0	1	0	0	1	0	1	0
1062	1	0	0	0	0	0	0	1	0
1063	0	0	0	0	1	0	1	0	0
1064	1	0	0	0	0	0	0	1	0
1065	1	0	1	0	0	1	0	1	0
1066	1	0	0	0	0	0	0	0	0
1067	1	0	0	1	0	0	0	1	0
1068	1	0	0	0	0	0	0	0	0
1069	1	0	0	1	0	0	0	0	1
1070	0	1	0	0	0	0	0	0	0
1071	1	1	0	0	0	0	0	0	0
1072	1	0	0	1	0	0	0	0	0
1073	1	0	0	0	0	0	0	0	0
1074	1	0	0	1	0	0	0	0	0
1075	1	0	0	0	0	0	0	0	0
1076	0	0	0	1	1	0	0	0	0
1077	1	0	0	0	0	0	0	0	1
1078	0	0	0	0	1	0	0	1	0
1079	0	0	1	0	0	0	0	1	0
1080	0	0	0	0	0	1	0	0	1
1081	0	0	0	0	1	0	1	0	0
1082	1	0	0	0	0	0	0	0	0
1083	1	0	0	0	0	0	0	1	0
1084	1	0	0	0	0	0	0	1	0
1085	1	0	0	0	1	0	1	0	0
1086	1	0	0	1	0	0	0	0	0
1087	1	1	0	0	1	0	0	0	0
1088	0	0	0	0	1	0	1	0	0
1089	0	0	0	0	0	0	0	1	1
1090	0	0	0	0	1	0	0	1	0
1091	0	0	0	1	0	0	0	1	1
1092	1	0	0	0	0	0	0	1	0
1093	1	1	0	0	0	0	0	0	0
1094	0	0	1	1	0	0	0	1	0
1095	0	0	0	0	0	0	1	0	1
1096	1	0	0	0	0	1	0	1	0
1097	1	0	0	0	0	0	0	0	1
1098	0	0	0	0	0	0	0	1	1

## Sheet: Student10
2024 Number	Categories
	M-shaped	Single spotted	Striated	Blotchy	Spotted	Starburst	Speckled	Banded	Patchy
1001	0	0	0	1	0	0	0	0	1
1002	0	0	0	0	0	0	0	1	1
1003	1	1	0	0	0	0	0	0	0
1004	0	0	1	0	0	1	1	0	0
1005	0	0	0	1	0	0	0	0	0
1006	0	0	1	0	0	1	0	1	0
1007	1	0	0	0	0	1	0	0	0
1008	1	0	0	0	0	0	0	0	0
1009	1	0	0	1	0	0	0	0	0
1010	1	1	0	0	0	0	0	0	0
1011	1	0	0	0	0	1	0	0	0
1012	0	0	0	0	0	1	0	0	0
1013	0	1	0	0	0	1	0	0	0
1014	1	1	0	0	0	1	0	0	0
1015	1	0	0	1	0	0	0	0	0
1016	0	0	0	1	0	0	0	0	1
1017	1	0	0	0	0	0	0	0	0
1018	1	0	0	1	1	0	0	0	0
1019	0	0	0	1	0	0	0	0	1
1020	0	0	0	1	1	0	0	0	0
1021	0	0	0	1	0	0	0	0	0
1022	0	0	0	0	0	1	0	0	1
1023	0	0	0	1	0	0	0	0	0
1024	0	1	0	0	0	0	0	0	0
1025	0	0	0	0	1	0	0	0	1
1026	0	0	0	1	0	1	0	0	1
1027	0	0	0	1	0	0	0	0	0
1028	1	0	0	0	0	0	0	0	0
1029	1	1	0	0	0	0	0	0	0
1030	1	0	0	0	0	0	0	0	1
1031	1	0	0	1	0	0	0	0	0
1032	0	0	0	1	0	1	0	0	0
1033	1	0	0	0	0	0	0	0	1
1034	0	0	0	0	1	1	0	0	1
1035	0	1	0	0	0	0	0	0	0
1036	1	0	0	0	0	0	0	0	0
1037	1	1	0	0	0	0	0	0	0
1038	1	1	0	1	0	0	0	0	0
1039	0	0	0	1	1	0	1	0	0
1040	0	0	0	1	0	0	0	0	0
1041	0	1	0	0	0	0	0	0	0
1042	0	0	0	0	0	1	1	0	0
1043	0	0	0	0	0	0	0	0	1
1044	0	0	0	0	0	1	0	0	0
1045	1	0	0	0	0	0	0	0	0
1046	1	0	0	1	0	0	0	0	0
1047	0	0	0	1	1	0	0	0	0
1048	1	1	0	0	0	0	0	0	0
1049	0	0	0	1	0	0	0	0	0
1050	1	1	0	0	0	0	0	0	0
1051	0	0	0	0	0	0	1	0	1
1052	1	1	0	0	0	0	0	0	0
1053	0	0	0	1	1	0	0	0	0
1054	1	0	0	0	0	0	0	0	0
1055	0	0	0	1	0	0	0	0	0
1056	0	0	0	0	1	1	0	0	0
1057	0	0	0	0	0	0	0	0	1
1058	0	1	0	0	0	0	0	0	0
1059	0	0	0	0	0	1	0	0	0
1060	0	0	0	0	1	0	1	0	0
1061	0	0	1	0	0	1	0	1	0
1062	1	0	1	0	0	1	0	0	0
1063	0	1	0	0	1	0	0	0	0
1064	1	0	0	1	0	0	0	0	0
1065	0	0	1	1	0	1	0	0	0
1066	0	0	0	1	0	0	0	0	0
1067	1	0	0	0	0	0	0	0	0
1068	0	1	0	0	0	0	0	0	0
1069	0	0	0	1	0	0	0	0	0
1070	0	1	0	0	0	0	0	0	0
1071	1	0	0	0	0	0	0	0	0
1072	0	0	0	1	0	0	0	0	1
1073	1	0	0	0	0	0	0	0	0
1074	1	0	0	0	0	0	0	0	0
1075	1	1	0	0	0	0	0	0	1
1076	0	0	0	0	0	1	0	1	0
1077	0	0	0	0	0	0	0	0	1
1078	0	0	0	0	0	0	1	0	0
1079	0	0	0	0	0	1	0	1	0
1080	0	0	1	0	0	0	1	0	0
1081	0	0	0	0	1	0	1	0	0
1082	0	0	0	1	0	0	0	0	0
1083	0	0	1	1	0	0	0	0	0
1084	0	0	0	0	0	0	0	0	1
1085	0	0	0	1	1	0	0	0	0
1086	1	0	0	1	0	0	0	0	0
1087	1	1	0	0	0	0	0	0	0
1088	0	0	1	0	1	0	1	0	0
1089	0	0	1	0	0	1	0	0	0
1090	0	0	0	0	1	0	1	0	0
1091	0	0	0	0	0	0	0	0	1
1092	1	0	0	1	0	0	0	0	0
1093	0	1	1	0	0	0	0	0	0
1094	0	0	0	1	0	0	0	0	1
1095	0	0	0	0	1	0	1	0	0
1096	0	0	1	0	0	1	0	0	0
1097	0	0	0	1	0	0	0	0	0
1098	0	0	0	0	0	0	1	0	0

[truncated: 21 more sheets: Student11, Student12, Student13, Student14, Student15, Student16, Student17, Student18, Student19, Student20, Student21, Student22, Student23, Student24, Student25, Student26, Student27, Student28, Student29, Student30 …]
